# Supplementary material
Source: PubMed Central journal article supplement (PMC3165532)

### Supplemental Figure 1

Microarray transcript expression data for genes in the *S. meliloti smb20055-cbtJKL* *smb20059* gene region. Microarray data are available from CIBEX Accession: CBX157.

#### Microarray Expression for Genes in SMb20056 Region

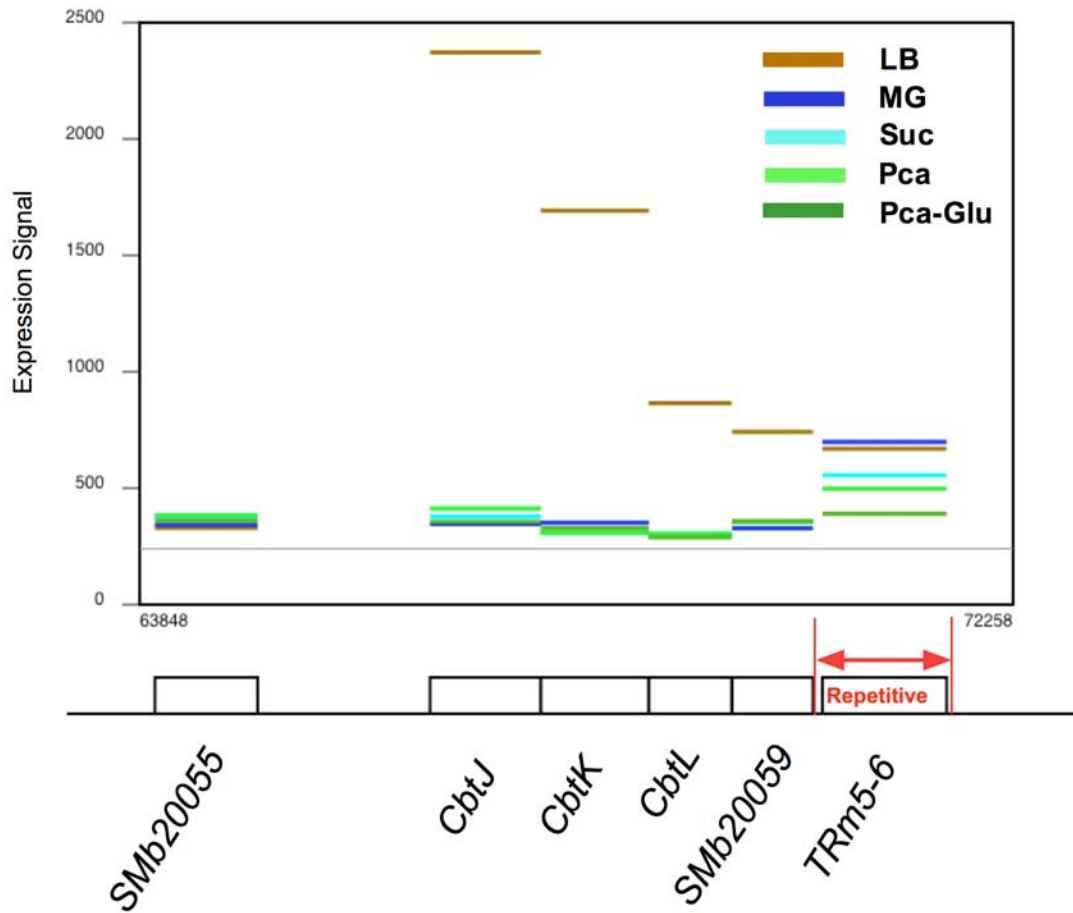

Supplement: supp_193_17_4405__1.pdf [file supp_193_17_4405__1.pdf]
