# Supplementary material
Source: PubMed Central journal article supplement (PMC3165532)

## Supplemental Figure 2

Growth of *Sinorhizobium meliloti* wild-type (RmP110),  $\Delta cbtJLK$  (RmP2361) and RmP2361 (pTH2563 -  $cbtJLK^+$ ) in agar plates containing M9-Succinate +/-CoCl<sub>2</sub> +/- 1  $\mu$ M EDTA and in LB +/-CoCl<sub>2</sub>.

(Each plate contained RmP110 (wild-type) -Upper Right, RmP2361( $\Delta cbtJLK$ ) - Bottom, and RmP2361 ( $\Delta cbtJLK$ , pTH2563 -  $cbtJLK^+$ ) – Upper Left)

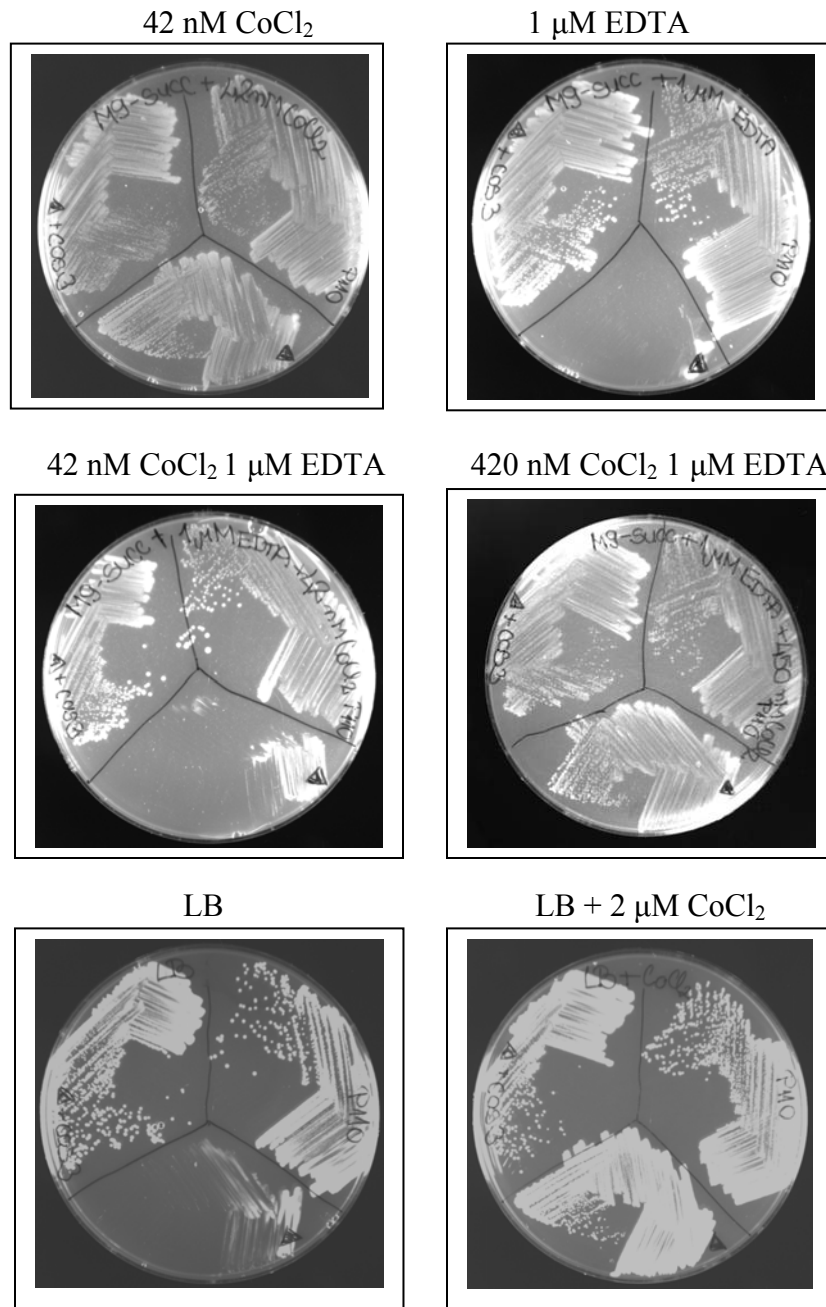

Supplement: supp_193_17_4405__2.pdf [file supp_193_17_4405__2.pdf]
