# Supplementary material
Source: PubMed Central journal article supplement (PMC3165532)
Supplement: supp_193_17_4405__3.pdf [file supp_193_17_4405__3.pdf]

SMGM\_E Experieme Replicate  
Exp#1 LB 3  
Exp#2 MG 3  
Exp#3 SUC 3  
Exp#4 PCA 3  
Exp#5 GLU\_PCA 3

Estimate of experimental background:

LB 227.42  
MG 241.9  
SUC 258.15  
PCA 236.95  
GLU\_PCA 282.96  
Average 249.48

| Index | Genome | Gene                | Type | start | end   | Direct | Total | S  | Unique | LB=>(LB=>Gene_E | MG=>MG=>Gene_f | SUC=:SUC=>Gene_ | PCA=:PCA=>Gene_ | GLU_P  | GLU_PCA=>( |
|-------|--------|---------------------|------|-------|-------|--------|-------|----|--------|-----------------|----------------|-----------------|-----------------|--------|------------|
| 1     | chrSm  | ?_SMC02793          | CDS  | 478   | 1299  | +      | 30    | 30 | 30     | ON              | 412.16         | ON              | 341.65          | 351.97 | 332.88     |
| 2     | chrSm  | ?_SMC02792          | CDS  | 1347  | 1946  | +      | 30    | 30 | 30     | ON              | 344.07         | NIL             | 359.59          | 348.27 | 348.27     |
| 3     | chrSm  | aroE1:_SMC02791     | CDS  | 1939  | 2799  | +      | 30    | 30 | 30     | ON              | 424.62         | ON              | 421.37          | 384.91 | 401.86     |
| 4     | chrSm  | ?_SMC02790          | CDS  | 2796  | 3380  | +      | 30    | 30 | 30     | ON              | 391.51         | ON              | 338.7           | 315.94 | 342.99     |
| 5     | chrSm  | dhao:_SMC02789      | CDS  | 3574  | 4302  | +      | 30    | 30 | 30     | ON              | 489.29         | ON              | 354.86          | 342.04 | 353.97     |
| 6     | chrSm  | secB:_SMC02788      | CDS  | 4408  | 4914  | -      | 30    | 30 | 30     | ON              | 843.01         | ON              | 378.79          | 450.79 | 357.76     |
| 7     | chrSm  | ?_SMC02787          | CDS  | 5082  | 5657  | -      | 30    | 30 | 30     | ON              | 642.04         | ON              | 302.73          | 431.14 | 364.98     |
| 8     | chrSm  | ?_SMC02786          | CDS  | 5792  | 6493  | +      | 30    | 30 | 30     | ON              | 690.49         | ON              | 414.09          | 462.64 | 399.67     |
| 9     | chrSm  | ?_SMC02785          | CDS  | 6511  | 7629  | +      | 31    | 31 | 31     | ON              | 465.67         | ON              | 372.47          | 375.68 | 335.43     |
| 10    | chrSm  | ?_SMC02784          | CDS  | 7622  | 8188  | +      | 30    | 30 | 30     | ON              | 506.26         | ON              | 393.46          | 403.08 | 381.59     |
| 11    | chrSm  | ?_SMC02783          | CDS  | 8185  | 8862  | +      | 30    | 30 | 30     | NIL             | 270.56         | NIL             | 297.88          | 271.01 | 296.08     |
| 12    | chrSm  | gyrB:_SMC02782      | CDS  | 8697  | 11132 | -      | 30    | 30 | 30     | ON              | 503.4          | ON              | 396.74          | 359.56 | 351.35     |
| 13    | chrSm  | ?_SMC02781          | CDS  | 11232 | 11828 | -      | 30    | 30 | 30     | ON              | 412.08         | ON              | 363.06          | 326.13 | 354.47     |
| 14    | chrSm  | gabD1:_SMC02780     | CDS  | 11996 | 13450 | +      | 30    | 30 | 30     | ON              | 398.49         | ON              | 372.43          | 359.86 | 359.86     |
| 15    | chrSm  | Trm1191-1:_SMC02779 | CDS  | 13646 | 14611 | -      | 68    | 0  | 0      | ON              | 384.19         | ON              | 291.16          | 343.21 | 299.92     |
| 16    | chrSm  | ?_SMC02778          | CDS  | 14893 | 15694 | -      | 30    | 30 | 30     | ON              | 362.39         | ON              | 332.64          | 387.42 | 413.92     |
| 17    | chrSm  | ?_SMC02777          | CDS  | 15706 | 16584 | -      | 30    | 30 | 30     | ON              | 321.51         | NIL             | 323.64          | 343.06 | 348.87     |
| 18    | chrSm  | ?_SMC02776          | CDS  | 16752 | 18257 | +      | 30    | 30 | 30     | ON              | 369.75         | ON              | 349.23          | 399.23 | 348.71     |
| 19    | chrSm  | ?_SMC02775          | CDS  | 18314 | 19333 | +      | 30    | 30 | 30     | ON              | 355.76         | ON              | 373.82          | 377.23 | 381.61     |
| 20    | chrSm  | ?_SMC02774          | CDS  | 19442 | 20431 | +      | 30    | 30 | 30     | ON              | 339.71         | ON              | 380.42          | 342.65 | 404.69     |
| 21    | chrSm  | ?_SMC02773          | CDS  | 20543 | 22094 | +      | 30    | 30 | 30     | NIL             | 312.03         | ON              | 338.76          | 274.92 | 304.79     |
| 22    | chrSm  | ?_SMC02772          | CDS  | 22130 | 23104 | +      | 30    | 30 | 30     | ON              | 321.7          | ON              | 361.81          | 263.87 | 282.24     |
| 23    | chrSm  | ?_SMC02771          | CDS  | 23151 | 24167 | +      | 30    | 30 | 30     | ON              | 316.14         | ON              | 462.2           | 463.31 | 412.22     |
| 24    | chrSm  | ?_SMC02770          | CDS  | 24435 | 25709 | +      | 30    | 30 | 30     | ON              | 368.05         | ON              | 376.03          | 328.12 | 358.03     |
| 25    | chrSm  | ?_SMC02769          | CDS  | 25859 | 26284 | +      | 30    | 30 | 30     | ON              | 375.37         | ON              | 337.37          | 422.96 | 323.91     |
| 26    | chrSm  | ?_SMC02768          | CDS  | 26383 | 27138 | +      | 30    | 30 | 30     | ON              | 375.04         | ON              | 337.59          | 336.63 | 364.72     |
| 27    | chrSm  | trpE:_SMC02767      | CDS  | 27376 | 28023 | +      | 30    | 30 | 30     | ON              | 453.3          | ON              | 367.54          | 348.58 | 383.3      |
| 28    | chrSm  | trpB:_SMC02766      | CDS  | 28048 | 29268 | +      | 30    | 30 | 30     | ON              | 558.4          | ON              | 445.21          | 430.71 | 409.57     |
| 29    | chrSm  | trpA:_SMC02765      | CDS  | 29274 | 30113 | +      | 30    | 30 | 30     | ON              | 457.34         | ON              | 388.23          | 326.25 | 367.9      |
| 30    | chrSm  | accD:_SMC02764      | CDS  | 30167 | 31081 | +      | 30    | 30 | 30     | ON              | 410.41         | ON              | 408.96          | 365.91 | 381.62     |
| 31    | chrSm  | folC:_SMC02763      | CDS  | 31097 | 32440 | +      | 30    | 30 | 30     | ON              | 534.46         | ON              | 482.25          | 401.22 | 466.2      |
| 32    | chrSm  | TRN22-1:_SMC02762   | CDS  | 32788 | 33951 | +      | 49    | 0  | 0      | ON              | 459.79         | ON              | 423.01          | 352.47 | 393.61     |
| 33    | chrSm  | trxA:_SMC02761      | CDS  | 34091 | 34414 | -      | 30    | 30 | 30     | ON              | 868.58         | ON              | 661             | 506.87 | 576.06     |
| 34    | chrSm  | ?_SMC02760          | CDS  | 34496 | 38065 | -      | 30    | 30 | 30     | ON              | 378.29         | ON              | 382.83          | 354.97 | 363.5      |
| 35    | chrSm  | ?_SMC02759          | CDS  | 38055 | 41234 | -      | 30    | 30 | 30     | ON              | 406.51         | ON              | 399.73          | 362.81 | 359.06     |
| 36    | chrSm  | ?_SMC02758          | CDS  | 41236 | 41967 | -      | 30    | 30 | 30     | ON              | 531.17         | ON              | 438.82          | 352.23 | 362.28     |
| 37    | chrSm  | ?_SMC02757          | CDS  | 41974 | 43488 | -      | 30    | 30 | 30     | ON              | 355.47         | ON              | 347.74          | 436.01 | 350.69     |
| 38    | chrSm  | ?_SMC02756          | CDS  | 43498 | 45978 | -      | 30    | 30 | 30     | ON              | 409.01         | ON              | 328.15          | 329.8  | 338.1      |
| 39    | chrSm  | ahcY:_SMC02755      | CDS  | 46380 | 47680 | -      | 30    | 30 | 30     | ON              | 1190.4         | ON              | 453.21          | 328.65 | 385.17     |
| 40    | chrSm  | ?_SMC02754          | CDS  | 47837 | 48127 | -      | 30    | 30 | 30     | ON              | 419.79         | ON              | 463.87          | 472.27 | 385.17     |
| 41    | chrSm  | ?_SMC02753          | CDS  | 48127 | 48528 | -      | 30    | 30 | 30     | ON              | 732.1          | ON              | 489.72          | 470.87 | 445.38     |
| 42    | chrSm  | chvG:_SMC02752      | CDS  | 48809 | 49255 | -      | 30    | 30 | 30     | ON              | 326.77         | NIL             | 306.35          | 470.87 | 435.27     |
| 43    | chrSm  | dhvG:_SMC04446      | CDS  | 49252 | 51039 | -      | 30    | 30 | 30     | ON              | 465.37         | ON              | 334.65          | 394.47 | 511.2      |
| 44    | chrSm  | chvI:_SMC02560      | CDS  | 51419 | 52141 | -      | 30    | 30 | 30     | ON              | 541.44         | ON              | 523.57          | 470.59 | 325.74     |
| 45    | chrSm  | pkfA:_SMC02562      | CDS  | 52483 | 54093 | +      | 30    | 30 | 30     | ON              | 393.08         | ON              | 432.98          | 430.06 | 394.06     |
| 46    | chrSm  | ?_SMC02563          | CDS  | 54631 | 55493 | +      | 30    | 30 | 30     | ON              | 317.23         | NIL             | 288.77          | 344.23 | 2320.87    |
| 47    | chrSm  | ?_SMC02564          | CDS  | 54717 | 55190 | +      | 30    | 30 | 30     | ON              | 359.16         | ON              | 471.77          | 385.29 | 346.27     |
| 48    | chrSm  | hskB:_SMC02566      | CDS  | 55295 | 55915 | +      | 30    | 30 | 30     | NIL             | 299.73         | ON              | 347.75          | 424.98 | 410.18     |
| 49    | chrSm  | coaA:_SMC02567      | CDS  | 56529 | 57524 | -      | 30    | 30 | 30     | ON              | 393.88         | ON              | 407.31          | 424.98 | 409.2      |
| 50    | chrSm  | hse:_SMC02568       | CDS  | 57521 | 57844 | -      | 30    | 30 | 30     | ON              | 340.77         | NIL             | 324.95          | 334.71 | 347.38     |
| 51    | chrSm  | hseF:_SMC02569      | CDS  | 57909 | 58685 | -      | 31    | 31 | 31     | ON              | 550.22         | ON              | 419.63          | 406.51 | 298.03     |
| 52    | chrSm  | hseA:_SMC02570      | CDS  | 58682 | 59425 | -      | 30    | 30 | 30     | ON              | 514.19         | ON              | 391             | 524.45 | 402.16     |

|           |                   |      |        |          |    |    |     |         |     |        |     |        |     |        |     |        |
|-----------|-------------------|------|--------|----------|----|----|-----|---------|-----|--------|-----|--------|-----|--------|-----|--------|
| 53 chrSm  | hsh-SM02572       | CDS  | 59458  | 60108 -  | 30 | 30 | ON  | 449.82  | ON  | 372.64 | ON  | 438.1  | ON  | 420.51 | ON  | 395.91 |
| 54 chrSm  | ?-SM02573         | CDS  | 60108  | 60581 -  | 30 | 30 | ON  | 406.4   | ON  | 308.2  | NIL | 308.2  | NIL | 319.84 | NIL | 292.9  |
| 55 chrSm  | hsh-SM02574       | CDS  | 60608  | 61216 -  | 30 | 30 | ON  | 457.12  | ON  | 386.12 | NIL | 342.85 | ON  | 387.92 | NIL | 320.58 |
| 56 chrSm  | hslv-SM02575      | CDS  | 61537  | 62094 +  | 31 | 31 | ON  | 320.34  | NIL | 266.8  | NIL | 281.76 | NIL | 266.48 | NIL | 300.73 |
| 57 chrSm  | ?-SM02576         | CDS  | 62602  | 62605 +  | 30 | 30 | ON  | 426.36  | ON  | 337.42 | ON  | 365.44 | ON  | 401.58 | NIL | 342.65 |
| 58 chrSm  | hslu-SM02577      | CDS  | 62602  | 63909 +  | 30 | 30 | ON  | 436.6   | ON  | 357.98 | NIL | 365.44 | ON  | 398.86 | NIL | 308.45 |
| 59 chrSm  | ?-SM02578         | CDS  | 64116  | 65066 +  | 30 | 30 | ON  | 367.83  | ON  | 342.38 | NIL | 336.56 | ON  | 347.31 | NIL | 334.56 |
| 60 chrSm  | ?-SM02579         | CDS  | 65218  | 66618 +  | 30 | 30 | ON  | 330.95  | ON  | 359.49 | NIL | 285.29 | NIL | 324.39 | NIL | 330.05 |
| 61 chrSm  | ?-SM02580         | CDS  | 66749  | 68755 +  | 30 | 30 | ON  | 525.29  | ON  | 479.29 | ON  | 426.93 | ON  | 418.1  | ON  | 421.01 |
| 62 chrSm  | gicB-SM02581      | CDS  | 68916  | 71087 +  | 30 | 30 | ON  | 428.91  | ON  | 339.32 | NIL | 332.51 | NIL | 324.42 | ON  | 398.69 |
| 63 chrSm  | ?-SM02582         | CDS  | 71294  | 72130 -  | 30 | 30 | ON  | 464.28  | ON  | 358.94 | ON  | 313.92 | NIL | 324.42 | ON  | 398.69 |
| 64 chrSm  | ?-SM02583         | CDS  | 72194  | 72718 +  | 30 | 30 | ON  | 326.31  | ON  | 384.64 | ON  | 339.18 | ON  | 324.42 | ON  | 398.69 |
| 65 chrSm  | actR-SM02584      | CDS  | 72733  | 73317 -  | 30 | 30 | ON  | 537.88  | ON  | 453.5  | ON  | 430.54 | ON  | 477.67 | ON  | 471.32 |
| 66 chrSm  | actS-SM02585      | CDS  | 73504  | 74805 -  | 30 | 30 | ON  | 366.96  | NIL | 312.83 | NIL | 321.04 | ON  | 365.19 | NIL | 354    |
| 67 chrSm  | hefO-SM02586      | CDS  | 74986  | 77488 -  | 30 | 30 | ON  | 360.26  | ON  | 380.88 | ON  | 383.1  | ON  | 359.52 | NIL | 371.75 |
| 68 chrSm  | ?-SM02587         | CDS  | 77448  | 78131 -  | 30 | 30 | ON  | 360.89  | NIL | 315.14 | NIL | 329.16 | NIL | 316.8  | NIL | 356.27 |
| 69 chrSm  | ?-SM02588         | CDS  | 78132  | 79820 -  | 31 | 31 | ON  | 397.1   | ON  | 402.04 | NIL | 343.3  | ON  | 374.64 | NIL | 337.49 |
| 70 chrSm  | ?-SM02589         | CDS  | 79804  | 81030 -  | 30 | 30 | ON  | 383.56  | ON  | 448.37 | ON  | 448.37 | ON  | 396.8  | ON  | 408.31 |
| 72 chrSm  | trNALE-1-SM02621  | trNA | 83507  | 83583 +  | 30 | 0  | ON  | 1407.95 | ON  | 586.82 | ON  | 761.23 | ON  | 627.49 | ON  | 535.29 |
| 73 chrSm  | trNAALA-1-SM02622 | trNA | 83723  | 83798 +  | 30 | 0  | ON  | 408.32  | ON  | 290.31 | NIL | 290.26 | ON  | 292.07 | NIL | 334.05 |
| 76 chrSm  | trNAAL-1-SM02623  | trNA | 87815  | 87891 +  | 30 | 0  | ON  | 716.98  | ON  | 408.24 | ON  | 371.41 | ON  | 441.67 | ON  | 362.77 |
| 77 chrSm  | ?-SM02590         | CDS  | 88719  | 89423 +  | 31 | 31 | ON  | 363.69  | ON  | 343.28 | NIL | 343.7  | NIL | 377.3  | NIL | 315.34 |
| 78 chrSm  | ?-SM02591         | CDS  | 89374  | 89913 -  | 32 | 32 | ON  | 327.78  | ON  | 341.02 | NIL | 329.39 | NIL | 295.97 | NIL | 323.94 |
| 79 chrSm  | ?-SM02592         | CDS  | 89913  | 90503 -  | 30 | 30 | ON  | 371.5   | ON  | 379.81 | NIL | 368.99 | ON  | 361.54 | NIL | 356.76 |
| 80 chrSm  | ?-SM02593         | CDS  | 90500  | 91132 -  | 30 | 30 | ON  | 342.4   | ON  | 331.38 | ON  | 459.31 | ON  | 374.28 | ON  | 397.73 |
| 81 chrSm  | ?-SM02594         | CDS  | 91222  | 91890 -  | 30 | 30 | ON  | 380.57  | ON  | 330.28 | ON  | 420.69 | ON  | 372.48 | NIL | 364.34 |
| 82 chrSm  | meiB-SM02595      | CDS  | 91920  | 93146 -  | 30 | 30 | ON  | 366.06  | ON  | 305.74 | NIL | 431.16 | ON  | 357.06 | NIL | 359.27 |
| 83 chrSm  | ?-SM02596         | CDS  | 92387  | 94138 +  | 30 | 30 | ON  | 326.24  | NIL | 305.26 | NIL | 305.74 | NIL | 334.06 | NIL | 314.96 |
| 84 chrSm  | ?-SM04463         | CDS  | 94214  | 94570 +  | 30 | 30 | ON  | 866.77  | ON  | 474.08 | ON  | 390.79 | ON  | 342.03 | NIL | 369.84 |
| 85 chrSm  | ?-SM02600         | CDS  | 94619  | 95767 +  | 30 | 30 | ON  | 412.07  | ON  | 356.44 | ON  | 390.84 | ON  | 387.8  | NIL | 344.35 |
| 86 chrSm  | ?-SM02602         | CDS  | 96049  | 96345 +  | 30 | 30 | ON  | 308.34  | ON  | 327.83 | NIL | 299.08 | NIL | 284.27 | NIL | 320.81 |
| 87 chrSm  | fofD1-SM02604     | CDS  | 96439  | 97359 -  | 30 | 30 | NIL | 301.14  | NIL | 294.19 | NIL | 364.37 | ON  | 347.26 | NIL | 338.7  |
| 88 chrSm  | soxG1-SM02605     | CDS  | 97382  | 97915 -  | 31 | 31 | NIL | 333.16  | NIL | 320.27 | NIL | 328.84 | NIL | 347.26 | NIL | 307.87 |
| 89 chrSm  | soxG1-SM02606     | CDS  | 97908  | 100871 - | 30 | 30 | NIL | 327.43  | ON  | 335.81 | NIL | 343.7  | NIL | 326.45 | NIL | 356.07 |
| 90 chrSm  | soxDT1-SM02607    | CDS  | 100868 | 101146 - | 30 | 30 | NIL | 270.13  | NIL | 288.77 | NIL | 363.56 | NIL | 319.89 | NIL | 310.06 |
| 91 chrSm  | soxB1-SM02608     | CDS  | 101172 | 102422 - | 30 | 30 | ON  | 403.42  | ON  | 359.22 | ON  | 411.57 | ON  | 372.69 | ON  | 418.54 |
| 92 chrSm  | gkxA-SM02609      | CDS  | 102517 | 103491 + | 30 | 30 | NIL | 336.52  | ON  | 391.95 | NIL | 346.3  | ON  | 389.47 | NIL | 389.47 |
| 93 chrSm  | gkxB-SM02610      | CDS  | 103542 | 104504 + | 30 | 30 | NIL | 312.42  | ON  | 363.86 | NIL | 372.35 | ON  | 388.31 | NIL | 368.06 |
| 94 chrSm  | gkxG-SM02611      | CDS  | 104542 | 105228 + | 30 | 30 | NIL | 336.98  | ON  | 374.56 | NIL | 332.35 | ON  | 375.4  | NIL | 375.4  |
| 95 chrSm  | gkxD-SM02612      | CDS  | 105243 | 106571 + | 30 | 30 | ON  | 335.91  | ON  | 444.1  | NIL | 367.83 | ON  | 413.87 | ON  | 409.9  |
| 96 chrSm  | gkT-SM02613       | CDS  | 106453 | 107960 + | 30 | 30 | NIL | 392.98  | ON  | 414.57 | ON  | 386.61 | ON  | 394.23 | NIL | 386.21 |
| 97 chrSm  | ?-SM02614         | CDS  | 108064 | 108327 - | 30 | 30 | NIL | 307.3   | ON  | 403.87 | NIL | 301.01 | NIL | 296.68 | NIL | 344.16 |
| 98 chrSm  | ?-SM02615         | CDS  | 108352 | 109095 - | 30 | 30 | ON  | 317.12  | NIL | 289.12 | ON  | 399.18 | ON  | 387.89 | ON  | 431.16 |
| 99 chrSm  | ?-SM02616         | CDS  | 109201 | 110598 - | 30 | 30 | NIL | 305.57  | NIL | 322    | NIL | 306.64 | ON  | 343.93 | NIL | 324.47 |
| 100 chrSm | ?-SM02617         | CDS  | 110613 | 110774 - | 30 | 30 | NIL | 241.05  | NIL | 251.18 | NIL | 249.11 | NIL | 278.77 | NIL | 260.78 |
| 101 chrSm | ?-SM02618         | CDS  | 110788 | 111171 - | 30 | 30 | NIL | 262.31  | NIL | 289.98 | NIL | 316.26 | NIL | 297.25 | NIL | 325.02 |
| 102 chrSm | ?-SM02619         | CDS  | 111180 | 111497 - | 30 | 30 | NIL | 272.44  | NIL | 309.74 | NIL | 238.94 | NIL | 309.51 | NIL | 281.56 |
| 103 chrSm | ?-SM02620         | CDS  | 111802 | 112533 + | 30 | 30 | ON  | 355.69  | ON  | 331.95 | NIL | 332.46 | NIL | 338.48 | NIL | 366.78 |
| 104 chrSm | purU2-SM04154     | CDS  | 112737 | 113627 + | 38 | 20 | NIL | 480.22  | ON  | 337.44 | NIL | 325.16 | ON  | 324.74 | NIL | 338.74 |
| 105 chrSm | ?-SM04153         | CDS  | 113903 | 114958 + | 30 | 30 | NIL | 291.3   | ON  | 328.83 | NIL | 316.17 | ON  | 358.02 | NIL | 311.59 |
| 106 chrSm | ?-SM04152         | CDS  | 114969 | 115574 + | 30 | 30 | ON  | 331.68  | NIL | 318.71 | NIL | 314.31 | NIL | 340.24 | ON  | 340.24 |
| 107 chrSm | ?-SM04151         | CDS  | 115610 | 116536 + | 30 | 30 | ON  | 326.77  | ON  | 328.17 | NIL | 337.49 | ON  | 347.85 | NIL | 335.9  |
| 108 chrSm | ?-SM04150         | CDS  | 116646 | 117686 + | 30 | 30 | NIL | 319.83  | NIL | 307.25 | NIL | 337.49 | ON  | 331.63 | NIL | 337.18 |
| 109 chrSm | ?-SM04149         | CDS  | 117754 | 119091 + | 30 | 30 | NIL | 282.74  | NIL | 334.13 | NIL | 335.4  | ON  | 359.51 | NIL | 363.03 |
| 110 chrSm | ?-SM04148         | CDS  | 119188 | 121597 + | 30 | 30 | ON  | 325.53  | NIL | 321.38 | NIL | 346.17 | ON  | 344.88 | NIL | 325.49 |
| 111 chrSm | ?-SM04147         | CDS  | 121792 | 123576 + | 30 | 30 | ON  | 312.63  | NIL | 316.78 | NIL | 297.7  | NIL | 306.55 | NIL | 327.15 |
| 112 chrSm | ?-SM04146         | CDS  | 123688 | 126057 - | 30 | 30 | NIL | 297.78  | NIL | 314.84 | NIL | 353.25 | ON  | 356.04 | NIL | 358.97 |
| 113 chrSm | ?-SM04145         | CDS  | 126289 | 127074 - | 30 | 30 | NIL | 371.47  | ON  | 381.53 | ON  | 388.74 | ON  | 376.41 | NIL | 376.41 |
| 114 chrSm | hvd3-SM04144      | CDS  | 127138 | 128862 + | 30 | 30 | NIL | 300.38  | NIL | 305.37 | NIL | 291.31 | NIL | 310.2  | NIL | 358.97 |
| 115 chrSm | ?-SM04143         | CDS  | 128940 | 129662 + | 30 | 30 | ON  | 419.46  | ON  | 447.87 | NIL | 362.28 | ON  | 396.77 | ON  | 414.79 |
| 116 chrSm | ?-SM04142         | CDS  | 129937 | 130821 + | 30 | 30 | ON  | 418.84  | ON  | 459.76 | NIL | 361.93 | ON  | 390.4  | NIL | 355.44 |
| 117 chrSm | gstr-SM04141      | CDS  | 130842 | 131483 - | 30 | 30 | ON  | 352.01  | NIL | 309.76 | NIL | 352.52 | ON  | 322.44 | NIL | 297.16 |
| 118 chrSm | ?-SM04139         | CDS  | 131480 | 132562 - | 30 | 30 | ON  | 331.16  | NIL | 286.11 | NIL | 340.27 | ON  | 366.05 | NIL | 350.88 |
| 119 chrSm | ?-SM04138         | CDS  | 132586 | 133659 - | 30 | 30 | ON  | 326.37  | NIL | 308.25 | NIL | 343.25 | ON  | 306.89 | NIL | 314.49 |
| 120 chrSm | ?-SM04137         | CDS  | 133661 | 134677 - | 30 | 30 | NIL | 275.96  | NIL | 308.25 | NIL | 343.25 | ON  | 306.89 | NIL | 314.49 |
| 121 chrSm | ?-SM04136         | CDS  | 134700 | 135587 - | 31 | 31 | NIL | 293.56  | NIL | 299.57 | NIL | 269.88 | NIL | 273.81 | NIL | 300.71 |
| 122 chrSm | ?-SM04135         | CDS  | 135580 | 136527 - | 30 | 30 | NIL | 313.78  | NIL | 289.57 | NIL | 301.57 | NIL | 282.07 | NIL | 300.56 |
| 123 chrSm | ?-SM04134         | CDS  | 136454 | 137825 - | 30 | 30 | NIL | 285.45  | NIL | 305.53 | NIL | 373.5  | NIL | 314.11 | NIL | 321.88 |
| 124 chrSm | ?-SM04133         | CDS  | 138020 | 138697 + | 30 | 30 | NIL | 266.88  | NIL | 307.77 | NIL | 297.36 | NIL | 256.82 | NIL | 297.85 |
| 125 chrSm | ?-SM04132         | CDS  | 138820 | 139696 + | 30 | 30 | ON  | 350.07  | NIL | 300.07 | NIL | 297.82 | NIL | 347.83 | NIL | 336.24 |
| 126 chrSm | ?-SM04131         | CDS  | 139722 | 141135 + | 30 | 30 | ON  | 340.95  | NIL | 306.51 | NIL | 341.1  | NIL | 331.27 | NIL | 337.19 |
| 127 chrSm | ?-SM04131         | CDS  | 141146 | 142561 + | 30 | 30 | ON  | 358.83  | ON  | 411.76 | NIL | 343.09 | ON  | 347.38 | NIL | 334.32 |



|     |       |                     |     |        |   |        |   |    |    |     |         |     |         |     |        |     |         |     |        |
|-----|-------|---------------------|-----|--------|---|--------|---|----|----|-----|---------|-----|---------|-----|--------|-----|---------|-----|--------|
| 200 | chrSm | 7: SMc02869         | CDS | 224764 | - | 225774 | - | 30 | 30 | ON  | 341.47  | ON  | 532.3   | NIL | 330.89 | ON  | 562.09  | NIL | 343.62 |
| 201 | chrSm | 7: SMc02870         | CDS | 225791 | - | 226855 | - | 30 | 30 | ON  | 349.9   | ON  | 474.91  | NIL | 387.8  | ON  | 580     | NIL | 343.67 |
| 202 | chrSm | 7: SMc02871         | CDS | 227691 | - | 227691 | - | 30 | 30 | ON  | 438.04  | ON  | 572.94  | NIL | 353.8  | ON  | 629.76  | NIL | 334.76 |
| 203 | chrSm | 7: SMc02872         | CDS | 227704 | - | 228651 | - | 30 | 30 | NIL | 375.73  | ON  | 413.5   | NIL | 262.72 | ON  | 464.45  | NIL | 318.27 |
| 204 | chrSm | 7: SMc02873         | CDS | 228920 | - | 230179 | - | 30 | 30 | ON  | 446.82  | ON  | 1202.41 | ON  | 467.51 | ON  | 1967.64 | ON  | 579.41 |
| 205 | chrSm | 7: SMc02874         | CDS | 230235 | - | 231131 | - | 30 | 30 | ON  | 391.85  | ON  | 496.32  | ON  | 446.86 | ON  | 464.9   | ON  | 388.06 |
| 206 | chrSm | 7: SMc02875         | CDS | 231331 | - | 232215 | + | 30 | 30 | ON  | 396.82  | ON  | 483.32  | ON  | 383.15 | ON  | 497.8   | NIL | 471.46 |
| 207 | chrSm | 7: SMc02876         | CDS | 232212 | - | 232976 | + | 30 | 30 | ON  | 324.04  | ON  | 346.85  | NIL | 328.24 | ON  | 597.04  | ON  | 379.32 |
| 208 | chrSm | 7: SMc02877         | CDS | 233070 | - | 234092 | + | 30 | 30 | ON  | 429.35  | ON  | 475.4   | ON  | 520.15 | ON  | 518.17  | ON  | 379.11 |
| 209 | chrSm | hpaA: SMc02878      | CDS | 234089 | - | 235249 | + | 30 | 30 | ON  | 419.98  | ON  | 466.17  | ON  | 419.53 | ON  | 306.87  | NIL | 319.11 |
| 210 | chrSm | 7: SMc02879         | CDS | 235333 | - | 236270 | - | 31 | 31 | ON  | 332.79  | NIL | 315.42  | NIL | 323.75 | NIL | 297.72  | NIL | 303.31 |
| 211 | chrSm | 7: SMc02880         | CDS | 236539 | - | 237178 | - | 30 | 30 | ON  | 343.01  | ON  | 334.9   | NIL | 286.76 | NIL | 357.93  | NIL | 359    |
| 212 | chrSm | 7: SMc02881         | CDS | 237175 | - | 238536 | - | 30 | 30 | ON  | 401.21  | ON  | 375.91  | NIL | 374.91 | ON  | 320.2   | NIL | 323.18 |
| 213 | chrSm | 7: SMc02882         | CDS | 238922 | - | 239656 | + | 30 | 30 | ON  | 369.36  | ON  | 333.07  | NIL | 322.4  | ON  | 314.42  | NIL | 338.5  |
| 214 | chrSm | 7: SMc02883         | CDS | 239733 | - | 239945 | + | 30 | 30 | NIL | 294.98  | NIL | 287.89  | NIL | 370.52 | ON  | 565.3   | ON  | 428.6  |
| 215 | chrSm | 7: SMc02884         | CDS | 240021 | - | 241013 | - | 30 | 30 | ON  | 534.15  | ON  | 660.76  | ON  | 462.2  | ON  | 428.6   | ON  | 434.07 |
| 216 | chrSm | msrA1: SMc02885     | CDS | 241298 | - | 241951 | - | 30 | 30 | ON  | 411.64  | ON  | 414.22  | NIL | 348.64 | ON  | 408.14  | ON  | 402.83 |
| 217 | chrSm | 7: SMc02886         | CDS | 242004 | - | 242321 | - | 30 | 30 | ON  | 393.41  | NIL | 313.38  | ON  | 443.66 | ON  | 404.36  | ON  | 319.85 |
| 218 | chrSm | IRNASER-2: SMc02915 | RNA | 242351 | - | 242640 | + | 30 | 30 | ON  | 354.91  | ON  | 385.96  | NIL | 324.73 | ON  | 359.77  | NIL | 369.97 |
| 219 | chrSm | 7: SMc02887         | CDS | 242730 | - | 242894 | - | 30 | 30 | ON  | 330.84  | ON  | 724.66  | ON  | 437.97 | ON  | 379.88  | ON  | 402.29 |
| 220 | chrSm | 7: SMc02888         | CDS | 243152 | - | 244174 | - | 30 | 30 | ON  | 321.83  | ON  | 550.59  | ON  | 542.57 | ON  | 379.88  | ON  | 302.96 |
| 221 | chrSm | 7: SMc02889         | CDS | 244292 | - | 245557 | + | 30 | 30 | ON  | 353.57  | ON  | 361.88  | NIL | 363.87 | NIL | 333.86  | NIL | 392.84 |
| 222 | chrSm | 7: SMc02890         | CDS | 245554 | - | 247554 | + | 30 | 30 | NIL | 260.38  | NIL | 282.11  | NIL | 311.19 | NIL | 293.64  | ON  | 371.64 |
| 223 | chrSm | 7: SMc02891         | CDS | 248726 | + | 248726 | + | 30 | 30 | NIL | 298.38  | ON  | 348.59  | NIL | 361.64 | ON  | 354.07  | NIL | 371.5  |
| 224 | chrSm | 7: SMc02892         | CDS | 250291 | - | 250291 | - | 30 | 30 | ON  | 405.56  | ON  | 438.55  | NIL | 382.34 | ON  | 378.55  | NIL | 317.82 |
| 225 | chrSm | 7: SMc02893         | CDS | 250422 | - | 251348 | + | 30 | 30 | ON  | 394.57  | ON  | 351.19  | NIL | 398.69 | ON  | 311.16  | NIL | 371.82 |
| 226 | chrSm | 7: SMc02894         | CDS | 251362 | - | 251631 | - | 30 | 30 | NIL | 264.98  | NIL | 281.14  | NIL | 372.77 | NIL | 392.32  | NIL | 343.28 |
| 227 | chrSm | 7: SMc02895         | CDS | 251835 | - | 252779 | + | 30 | 30 | ON  | 463.63  | ON  | 406.16  | ON  | 396.64 | ON  | 377.8   | NIL | 377.8  |
| 228 | chrSm | lucE1: SMc02896     | CDS | 253002 | - | 254099 | - | 30 | 30 | ON  | 545.33  | ON  | 450.49  | NIL | 376.64 | ON  | 420.85  | ON  | 413.73 |
| 229 | chrSm | 7: SMc02897         | CDS | 254271 | - | 255050 | - | 30 | 30 | ON  | 800.36  | ON  | 425.94  | NIL | 367.12 | ON  | 544.07  | ON  | 437.03 |
| 230 | chrSm | KdsB: SMc02898      | CDS | 255204 | - | 255956 | + | 30 | 30 | ON  | 982.12  | ON  | 581.43  | ON  | 486.2  | ON  | 530.75  | ON  | 460.84 |
| 231 | chrSm | pheaA: SMc02899     | CDS | 255833 | - | 256633 | + | 30 | 30 | ON  | 490.89  | ON  | 372.92  | NIL | 364.65 | ON  | 391.91  | NIL | 351.63 |
| 232 | chrSm | 7: SMc02900         | CDS | 257006 | - | 257143 | + | 30 | 30 | ON  | 335.82  | ON  | 478.95  | NIL | 288.88 | NIL | 264.79  | NIL | 330.45 |
| 233 | chrSm | 7: SMc02901         | CDS | 257136 | - | 257643 | - | 30 | 30 | ON  | 363.87  | ON  | 372.44  | NIL | 319.93 | NIL | 343.31  | NIL | 364.18 |
| 234 | chrSm | 7: SMc02902         | CDS | 257736 | - | 258428 | - | 30 | 30 | ON  | 369.9   | ON  | 339.44  | ON  | 405.77 | ON  | 377.63  | NIL | 342.73 |
| 235 | chrSm | 7: SMc02903         | CDS | 258435 | - | 259415 | - | 30 | 30 | ON  | 369.62  | ON  | 339.04  | NIL | 346.28 | ON  | 352.07  | NIL | 358.45 |
| 236 | chrSm | 7: SMc02904         | CDS | 259822 | - | 259822 | - | 30 | 30 | ON  | 361.23  | ON  | 333.33  | NIL | 296.66 | ON  | 344.43  | NIL | 338.45 |
| 237 | chrSm | dhxX: SMc02905      | CDS | 260124 | - | 262004 | + | 30 | 30 | ON  | 445.59  | ON  | 359.91  | NIL | 343.38 | ON  | 350.74  | NIL | 328.97 |
| 238 | chrSm | 7: SMc02906         | CDS | 262113 | - | 262436 | + | 30 | 30 | ON  | 587.65  | ON  | 560.03  | NIL | 373.4  | ON  | 465.67  | NIL | 398.63 |
| 239 | chrSm | recR: SMc02908      | CDS | 262512 | - | 263123 | + | 30 | 30 | ON  | 447.27  | ON  | 357.85  | NIL | 322.72 | NIL | 329.44  | NIL | 338.57 |
| 240 | chrSm | 7: SMc02907         | CDS | 263174 | - | 263779 | + | 30 | 30 | ON  | 416.34  | ON  | 339.31  | ON  | 435.52 | NIL | 428.42  | NIL | 375.31 |
| 241 | chrSm | 7: SMc02909         | CDS | 263817 | - | 265055 | + | 30 | 30 | ON  | 394.06  | ON  | 323.8   | NIL | 351.82 | NIL | 315.02  | NIL | 377.23 |
| 242 | chrSm | 7: SMc02910         | CDS | 265263 | - | 266918 | - | 30 | 30 | ON  | 369.25  | ON  | 376.52  | NIL | 303.1  | ON  | 335.96  | NIL | 328.58 |
| 243 | chrSm | 7: SMc02911         | CDS | 267141 | - | 267758 | + | 30 | 30 | ON  | 769.97  | ON  | 468.08  | NIL | 489.13 | ON  | 498.2   | ON  | 382.83 |
| 244 | chrSm | rusaA: SMc02912     | CDS | 267804 | - | 269432 | + | 30 | 30 | ON  | 894.33  | ON  | 566.34  | ON  | 514.99 | ON  | 621.44  | ON  | 401.14 |
| 245 | chrSm | 7: SMc02913         | CDS | 269438 | - | 270130 | + | 30 | 30 | ON  | 1034.89 | ON  | 586.54  | ON  | 491.66 | ON  | 517.51  | NIL | 354.66 |
| 246 | chrSm | mfbA: SMc02914      | CDS | 270236 | - | 272905 | + | 30 | 30 | ON  | 273472  | +   | 282.07  | ON  | 385.31 | ON  | 409.42  | NIL | 451.16 |
| 247 | chrSm | tubB: SMc03020      | CDS | 270365 | - | 273485 | - | 30 | 30 | ON  | 273485  | -   | 319.29  | NIL | 282.15 | NIL | 469.85  | NIL | 354.66 |
| 248 | chrSm | 7: SMc03021         | CDS | 273485 | - | 274420 | + | 30 | 30 | ON  | 274420  | +   | 854.17  | ON  | 367.38 | ON  | 393.92  | NIL | 288.09 |
| 249 | chrSm | 7: SMc03022         | CDS | 274729 | - | 276686 | - | 30 | 30 | ON  | 276686  | -   | 345.73  | NIL | 351.16 | NIL | 332.02  | NIL | 343.71 |
| 250 | chrSm | rpsO: SMc03023      | CDS | 277323 | - | 279655 | + | 30 | 30 | ON  | 1581.97 | ON  | 864.17  | ON  | 405.48 | ON  | 678.73  | ON  | 473.23 |
| 251 | chrSm | ppm: SMc03024       | CDS | 277956 | - | 279556 | - | 30 | 30 | ON  | 1512.15 | ON  | 344.99  | ON  | 437.65 | ON  | 541.05  | ON  | 445.1  |
| 252 | chrSm | 7: SMc03025         | CDS | 280795 | - | 281601 | - | 30 | 30 | ON  | 597.32  | ON  | 395.13  | NIL | 323.41 | ON  | 349.65  | NIL | 330.34 |
| 253 | chrSm | fbf12: SMc03026     | CDS | 281606 | - | 282826 | - | 30 | 30 | ON  | 578.19  | ON  | 485.6   | NIL | 323.41 | ON  | 337.62  | NIL | 333.86 |
| 254 | chrSm | fbfB: SMc03027      | CDS | 282876 | - | 283391 | - | 30 | 30 | ON  | 640.74  | ON  | 399.89  | NIL | 370.44 | ON  | 386.8   | ON  | 429.1  |
| 255 | chrSm | fbfA: SMc03028      | CDS | 282876 | - | 283391 | - | 30 | 30 | ON  | 640.74  | ON  | 399.89  | NIL | 322.94 | ON  | 348.32  | ON  | 370.08 |
| 256 | chrSm | lfr: SMc03029       | CDS | 283769 | - | 284191 | + | 30 | 30 | NIL | 280.17  | NIL | 317.96  | NIL | 286.36 | ON  | 338.64  | NIL | 280.76 |
| 257 | chrSm | 7: SMc03030         | CDS | 284222 | - | 284857 | - | 30 | 30 | NIL | 364.18  | ON  | 346.05  | NIL | 332.77 | ON  | 348.21  | NIL | 357.76 |
| 258 | chrSm | 7: SMc03031         | CDS | 284921 | - | 285928 | - | 30 | 30 | ON  | 347.3   | NIL | 325.37  | NIL | 343.77 | ON  | 342.47  | NIL | 334.32 |
| 259 | chrSm | trmAALA-4: SMc0435  | RNA | 285983 | - | 286656 | - | 30 | 30 | ON  | 380.11  | NIL | 300.65  | NIL | 357.28 | NIL | 310.55  | ON  | 334.32 |
| 260 | chrSm | 7: SMc03032         | CDS | 286304 | - | 286693 | - | 30 | 30 | ON  | 1569.86 | ON  | 769.79  | ON  | 790.8  | ON  | 791.19  | ON  | 704.58 |
| 261 | chrSm | aroA: SMc03033      | CDS | 286978 | - | 288345 | + | 30 | 30 | ON  | 675.34  | ON  | 359.61  | ON  | 432.86 | ON  | 393.26  | ON  | 405.66 |
| 262 | chrSm | cmk: SMc03034       | CDS | 288345 | + | 288983 | + | 30 | 30 | ON  | 492.05  | ON  | 450.8   | ON  | 370.23 | ON  | 375.31  | NIL | 372.79 |
| 263 | chrSm | rpsA: SMc03035      | CDS | 289147 | - | 290853 | + | 30 | 30 | ON  | 289147  | -   | 885.28  | ON  | 576.86 | ON  | 609.14  | ON  | 455.38 |
| 264 | chrSm | 7: SMc03036         | CDS | 291267 | - | 292987 | - | 30 | 30 | ON  | 449.1   | ON  | 445.8   | ON  | 413.98 | ON  | 470.41  | ON  | 453.13 |
| 265 | chrSm | 7: SMc03037         | CDS | 292987 | - | 293310 | + | 30 | 30 | NIL | 284.66  | NIL | 313.11  | NIL | 314.37 | NIL | 267.68  | NIL | 298.76 |
| 266 | chrSm | 7: SMc03038         | CDS | 293383 | - | 293910 | - | 30 | 30 | ON  | 378.45  | ON  | 397.91  | NIL | 338.44 | ON  | 375.19  | NIL | 361.28 |
| 267 | chrSm | trmALEU-2: SMc0434  | RNA | 294302 | - | 294388 | + | 30 | 30 | ON  | 1048.05 | ON  | 1024.3  | ON  | 627.36 | ON  | 496.34  | ON  | 532.85 |
| 268 | chrSm | gyaA: SMc03039      | CDS | 294516 | - | 296513 | - | 30 | 30 | ON  | 382.44  | NIL | 318.11  | NIL | 330.28 | NIL | 313.21  | NIL | 339.8  |
| 269 | chrSm | 7: SMc03040         | CDS | 296607 | - | 297653 | - | 30 | 30 | ON  | 353.94  | ON  | 333.27  | NIL | 323.7  | NIL | 364.04  | NIL | 352.99 |
| 270 | chrSm | 7: SMc03041         | CDS | 297739 | - | 298068 | - | 30 | 30 | ON  | 340.24  | NIL | 304.18  | NIL | 269.5  | NIL | 269.04  | NIL | 288.41 |
| 271 | chrSm | 7: SMc03042         | CDS | 298249 | - | 298902 | + | 30 | 30 | ON  | 691     | ON  | 521.7   | NIL | 312.3  | ON  | 377.11  | NIL | 347.57 |

|     |       |                  |     |          |          |    |    |     |         |     |         |     |         |     |         |     |        |
|-----|-------|------------------|-----|----------|----------|----|----|-----|---------|-----|---------|-----|---------|-----|---------|-----|--------|
| 272 | chrSm | TRn20-1:SMC00343 | CDS | 299237   | 300409 + | 74 | 0  | ON  | 351.96  | ON  | 359.43  | ON  | 333.29  | NIL | 367.97  | ON  | 325.53 |
| 273 | chrSm | ?_SMC00344       | CDS | 301029   | 301319 - | 30 | 30 | NIL | 290.98  | ON  | 327.02  | NIL | 303.62  | NIL | 282.24  | ON  | 334.68 |
| 274 | chrSm | ?_SMC00345       | CDS | 301499   | 301780 - | 30 | 30 | ON  | 329.51  | ON  | 374.76  | NIL | 386.84  | ON  | 390.39  | ON  | 380.86 |
| 275 | chrSm | ?_SMC00346       | CDS | 301983   | 302435 + | 30 | 30 | ON  | 522.52  | ON  | 451.25  | NIL | 329.13  | ON  | 374.23  | NIL | 354.85 |
| 276 | chrSm | TRn_SMC00347     | CDS | 302529   | 302936 - | 30 | 30 | ON  | 403.59  | ON  | 460.79  | ON  | 471.23  | ON  | 448.45  | ON  | 412.44 |
| 277 | chrSm | ?_SMC00348       | CDS | 303335   | 303548 - | 30 | 30 | ON  | 373.89  | NIL | 298.83  | NIL | 329.07  | NIL | 321.18  | NIL | 357.05 |
| 278 | chrSm | IRpA_SMC00349    | CDS | 303622   | 306772 - | 30 | 30 | ON  | 648.17  | ON  | 510.79  | ON  | 389.54  | ON  | 380.27  | NIL | 356.59 |
| 279 | chrSm | ?_SMC00350       | CDS | 305507   | 306772 + | 30 | 30 | ON  | 314.37  | NIL | 303.8   | NIL | 309.08  | NIL | 294.54  | NIL | 298.12 |
| 280 | chrSm | ?_SMC00351       | CDS | 306948   | 307541 + | 30 | 30 | ON  | 432.92  | ON  | 349.52  | NIL | 352.64  | ON  | 399.99  | ON  | 410.24 |
| 281 | chrSm | ?_SMC00352       | CDS | 307543   | 308070 + | 30 | 30 | NIL | 288.93  | NIL | 292.98  | NIL | 299.49  | NIL | 304.18  | NIL | 289.75 |
| 282 | chrSm | exonD_SMC00353   | CDS | 308106   | 308828 - | 30 | 30 | ON  | 372.37  | ON  | 373.5   | NIL | 328.74  | ON  | 313.46  | NIL | 322.41 |
| 283 | chrSm | ?_SMC00354       | CDS | 309005   | 309670 + | 30 | 30 | ON  | 509.94  | ON  | 570.5   | ON  | 478.08  | ON  | 384.94  | NIL | 358.99 |
| 284 | chrSm | ?_SMC00355       | CDS | 309988   | 310640 - | 30 | 30 | ON  | 393.85  | ON  | 336.3   | ON  | 470.36  | ON  | 398.4   | ON  | 379.95 |
| 285 | chrSm | genX_SMC00356    | CDS | 311037   | 312089 - | 30 | 30 | ON  | 377.95  | ON  | 405.04  | ON  | 410.35  | ON  | 362.81  | ON  | 369.68 |
| 286 | chrSm | epi_SMC00357     | CDS | 311251   | 312820 - | 30 | 30 | ON  | 758.87  | ON  | 581.36  | ON  | 471.36  | ON  | 456.39  | ON  | 413.8  |
| 287 | chrSm | cdt1_SMC00358    | CDS | 313033   | 314274 + | 30 | 30 | ON  | 407.94  | ON  | 440.7   | ON  | 435.85  | ON  | 433.82  | NIL | 441.2  |
| 288 | chrSm | ?_SMC00359       | CDS | 314549   | 315532 + | 30 | 30 | ON  | 325.72  | ON  | 329.31  | NIL | 295.52  | NIL | 312.47  | NIL | 312.75 |
| 289 | chrSm | ?_SMC00360       | CDS | 315764   | 316441 - | 30 | 30 | ON  | 437.75  | ON  | 520.09  | ON  | 466.29  | ON  | 549.49  | ON  | 457.47 |
| 290 | chrSm | ?_SMC00361       | CDS | 316668   | 317510 - | 30 | 30 | ON  | 491.14  | ON  | 401.44  | ON  | 465.41  | ON  | 493.46  | ON  | 430.46 |
| 291 | chrSm | IRnC_SMC00362    | CDS | 317832   | 318263 + | 30 | 30 | ON  | 2052.7  | ON  | 1109.05 | ON  | 771.15  | ON  | 994.45  | ON  | 877.53 |
| 292 | chrSm | IRpnl_SMC00363   | CDS | 318504   | 318707 + | 30 | 30 | ON  | 4217.68 | ON  | 1612.77 | ON  | 1109.16 | ON  | 1237.23 | ON  | 798.15 |
| 293 | chrSm | IRpT_SMC00364    | CDS | 318744   | 320376 + | 30 | 30 | ON  | 3416.57 | ON  | 829.27  | ON  | 763.46  | ON  | 739.86  | ON  | 657.17 |
| 294 | chrSm | ?_SMC00365       | CDS | 319294   | 320376 + | 30 | 30 | ON  | 570.28  | ON  | 411.07  | NIL | 367.97  | ON  | 387.43  | NIL | 354.29 |
| 295 | chrSm | phnE_SMC00366    | CDS | 320410   | 322517 - | 30 | 30 | NIL | 279.13  | NIL | 284.52  | NIL | 346.28  | ON  | 362.83  | NIL | 386.47 |
| 296 | chrSm | ?_SMC00367       | CDS | 323158   | 323517 - | 30 | 30 | NIL | 325.17  | ON  | 369.42  | NIL | 329.96  | NIL | 296     | NIL | 310.27 |
| 297 | chrSm | ?_SMC00368       | CDS | 323683   | 324441 - | 30 | 30 | NIL | 338.06  | ON  | 316.58  | NIL | 298.89  | NIL | 335.66  | NIL | 317.2  |
| 298 | chrSm | ?_SMC00369       | CDS | 324459   | 324662 - | 30 | 30 | NIL | 264.44  | NIL | 620.53  | NIL | 294.08  | NIL | 302.78  | NIL | 314.5  |
| 299 | chrSm | ?_SMC00370       | CDS | 324843   | 325733 + | 30 | 30 | NIL | 423.72  | ON  | 337.87  | NIL | 337.87  | ON  | 419.59  | NIL | 404.27 |
| 300 | chrSm | ?_SMC00371       | CDS | 325767   | 326288 - | 30 | 30 | NIL | 266.64  | ON  | 387.86  | NIL | 310.29  | ON  | 362.59  | NIL | 289.33 |
| 301 | chrSm | ?_SMC00372       | CDS | 327479   | 327249 + | 30 | 30 | ON  | 386.6   | ON  | 363.95  | ON  | 426.16  | ON  | 405.32  | NIL | 371.11 |
| 302 | chrSm | ?_SMC00373       | CDS | 327990   | 328064 + | 30 | 30 | ON  | 348.94  | ON  | 345.22  | NIL | 355.63  | ON  | 383.33  | NIL | 329.12 |
| 303 | chrSm | ?_SMC00374       | CDS | 328151   | 329194 - | 30 | 30 | ON  | 381.75  | ON  | 514.81  | ON  | 444.27  | ON  | 449.76  | NIL | 428.77 |
| 304 | chrSm | ?_SMC00375       | CDS | 329317   | 330303 + | 30 | 30 | ON  | 364.81  | ON  | 395.21  | NIL | 355.2   | NIL | 372.13  | NIL | 303.23 |
| 305 | chrSm | ?_SMC00376       | CDS | 330352   | 330762 + | 30 | 30 | ON  | 318.46  | NIL | 317.7   | NIL | 321.35  | NIL | 346.5   | NIL | 325.8  |
| 306 | chrSm | ?_SMC00377       | CDS | 330891   | 331682 + | 30 | 30 | ON  | 349.98  | NIL | 318.77  | NIL | 344.22  | NIL | 342.18  | NIL | 327.42 |
| 307 | chrSm | ?_SMC00378       | CDS | 331801   | 333381 + | 30 | 30 | ON  | 390.93  | ON  | 368.58  | ON  | 422.63  | ON  | 312.25  | ON  | 312.25 |
| 308 | chrSm | ?_SMC00379       | CDS | 333971   | 333971 + | 30 | 30 | ON  | 349.68  | NIL | 309.3   | ON  | 445.17  | ON  | 373.67  | NIL | 379.73 |
| 309 | chrSm | ?_SMC00380       | CDS | 333980   | 334474 - | 30 | 30 | ON  | 349.68  | NIL | 368.58  | ON  | 422.63  | ON  | 373.67  | NIL | 379.73 |
| 310 | chrSm | ?_SMC00381       | CDS | 334560   | 335460 + | 30 | 30 | NIL | 313.99  | ON  | 332.4   | NIL | 313.57  | NIL | 307.64  | NIL | 341.83 |
| 311 | chrSm | ?_SMC00382       | CDS | 335699   | 336955 - | 30 | 30 | ON  | 574.41  | ON  | 618.36  | ON  | 400.76  | ON  | 482.54  | NIL | 482.54 |
| 312 | chrSm | IRnI_SMC00383    | CDS | 337712 - | 337712 - | 30 | 30 | ON  | 352.83  | ON  | 332.61  | NIL | 294.21  | NIL | 343.35  | NIL | 306.73 |
| 313 | chrSm | ?_SMC00384       | CDS | 337736   | 338245 + | 30 | 30 | NIL | 291.98  | NIL | 298.91  | NIL | 322.66  | NIL | 279.35  | NIL | 309.94 |
| 314 | chrSm | ?_SMC00385       | CDS | 338537   | 339010 - | 30 | 30 | ON  | 387.25  | ON  | 388     | NIL | 323.88  | NIL | 289.01  | NIL | 320.5  |
| 315 | chrSm | ?_SMC00386       | CDS | 339014   | 339264 - | 30 | 30 | ON  | 352.14  | ON  | 352.14  | NIL | 350.4   | NIL | 323.13  | NIL | 328.62 |
| 316 | chrSm | IRnA_SMC00387    | CDS | 339573   | 340742 - | 30 | 30 | ON  | 384.11  | ON  | 448.18  | ON  | 446.84  | ON  | 437.28  | ON  | 434.2  |
| 317 | chrSm | ?_SMC00388       | CDS | 340940   | 341901 - | 30 | 30 | ON  | 473.68  | ON  | 473.68  | ON  | 390.65  | ON  | 367.73  | ON  | 380.38 |
| 318 | chrSm | ?_SMC00389       | CDS | 341999   | 342586 - | 30 | 30 | NIL | 256.2   | NIL | 284.13  | NIL | 329.29  | NIL | 275.87  | NIL | 307.67 |
| 319 | chrSm | ?_SMC00390       | CDS | 342920   | 343218 + | 30 | 30 | NIL | 344.2   | NIL | 351.27  | NIL | 320.83  | NIL | 326.3   | NIL | 340.02 |
| 320 | chrSm | ?_SMC00391       | CDS | 343024   | 343504 - | 30 | 30 | NIL | 350.02  | NIL | 290.08  | NIL | 251.74  | NIL | 263.82  | NIL | 304.82 |
| 321 | chrSm | ?_SMC00392       | CDS | 343262   | 343929 + | 30 | 30 | NIL | 250.11  | NIL | 275.87  | NIL | 290.52  | NIL | 283.82  | NIL | 289.27 |
| 322 | chrSm | ?_SMC00393       | CDS | 343504   | 344521 - | 30 | 30 | NIL | 302.86  | NIL | 276.64  | NIL | 302.76  | NIL | 308.91  | NIL | 345.18 |
| 323 | chrSm | quaA_SMC00394    | CDS | 343959   | 345628   | 30 | 30 | ON  | 604.5   | ON  | 421.14  | NIL | 342.86  | NIL | 359.35  | NIL | 356.43 |
| 324 | chrSm | IRnE_SMC00395    | CDS | 346263   | 346966 - | 30 | 30 | ON  | 372.41  | ON  | 496.88  | ON  | 483.89  | NIL | 431.85  | NIL | 388.63 |
| 325 | chrSm | ?_SMC00396       | CDS | 346637   | 347675 - | 30 | 30 | NIL | 443.87  | ON  | 260.58  | NIL | 277.34  | NIL | 293.43  | ON  | 297.72 |
| 326 | chrSm | ?_SMC00397       | CDS | 347427   | 347427 + | 30 | 30 | NIL | 245.49  | NIL | 260.58  | NIL | 277.34  | NIL | 293.43  | ON  | 297.72 |
| 327 | chrSm | ?_SMC00400       | CDS | 347376   | 348509 - | 30 | 30 | ON  | 446.63  | ON  | 426.34  | ON  | 409.8   | NIL | 376.15  | NIL | 366.82 |
| 328 | chrSm | corA1_SMC00399   | CDS | 347723   | 349712 - | 30 | 30 | ON  | 326.7   | ON  | 325.49  | ON  | 385.35  | NIL | 334.93  | NIL | 353.35 |
| 329 | chrSm | ?_SMC00401       | CDS | 349932   | 351059 - | 30 | 30 | ON  | 372.33  | ON  | 411.12  | ON  | 380.2   | ON  | 404.57  | NIL | 322.41 |
| 330 | chrSm | ?_SMC00402       | CDS | 351059   | 352402 - | 30 | 30 | ON  | 326.7   | ON  | 325.49  | ON  | 385.35  | NIL | 334.93  | NIL | 353.35 |
| 331 | chrSm | ?_SMC00403       | CDS | 352658   | 353938 - | 30 | 30 | ON  | 384.76  | ON  | 451.47  | ON  | 380.2   | ON  | 404.57  | NIL | 322.41 |
| 332 | chrSm | ?_SMC00404       | CDS | 354093   | 355382 - | 30 | 30 | ON  | 461.69  | ON  | 1615.22 | ON  | 787.02  | ON  | 849.75  | ON  | 597.98 |
| 333 | chrSm | ?_SMC00405       | CDS | 355519   | 355893 - | 30 | 30 | ON  | 430.56  | ON  | 575.16  | NIL | 374.77  | ON  | 377.51  | ON  | 331.97 |
| 334 | chrSm | ?_SMC00406       | CDS | 356554   | 357229 - | 30 | 30 | ON  | 430.56  | ON  | 575.16  | NIL | 346.32  | ON  | 447.79  | NIL | 356.24 |
| 335 | chrSm | ?_SMC00407       | CDS | 357289   | 358389 - | 30 | 30 | ON  | 437.38  | ON  | 575.16  | NIL | 346.32  | ON  | 447.79  | NIL | 356.24 |
| 336 | chrSm | IRn4_SMC00408    | CDS | 358400   | 359092 - | 30 | 30 | ON  | 312.75  | NIL | 484.34  | NIL | 314.95  | ON  | 352.23  | NIL | 412.4  |
| 337 | chrSm | ?_SMC00409       | CDS | 359249   | 360055 + | 30 | 30 | ON  | 470.57  | ON  | 484.34  | NIL | 314.95  | ON  | 352.23  | NIL | 412.4  |
| 338 | chrSm | ?_SMC00410       | CDS | 360327   | 360327 - | 30 | 30 | ON  | 531.35  | ON  | 409.66  | NIL | 328.66  | ON  | 382.97  | NIL | 356.01 |
| 339 | chrSm | ?_SMC00411       | CDS | 360766   | 360766 - | 30 | 30 | ON  | 593     | ON  | 393.88  | NIL | 299.08  | ON  | 451     | NIL | 324.2  |
| 340 | chrSm | ?_SMC00412       | CDS | 360976   | 361536 - | 30 | 30 | ON  | 688.2   | ON  | 492.06  | ON  | 379.18  | ON  | 445.36  | NIL | 347.5  |
| 341 | chrSm | pyrE_SMC00413    | CDS | 361677   | 361964 - | 30 | 30 | ON  | 602.18  | ON  | 503.27  | ON  | 417.47  | ON  | 451.79  | NIL | 370.57 |
| 342 | chrSm | ?_SMC00414       | CDS | 362070   | 362274 - | 30 | 30 | ON  | 425.64  | ON  | 390.88  | NIL | 372.14  | ON  | 348.36  | NIL | 371.38 |
| 343 | chrSm | ?_SMC00414       | CDS | 362782   | 363363 - | 30 | 30 | ON  | 393.77  | ON  | 537.33  | ON  | 382.66  | ON  | 388.58  | NIL | 371.48 |
| 344 | chrSm | ?_SMC00414       | CDS | 363378   | 363980 - | 30 | 30 | ON  | 439.07  | ON  | 537.33  | ON  | 382.66  | ON  | 388.58  | NIL | 371.48 |

|           |                |     |        |          |    |    |     |          |     |         |     |        |     |         |     |         |
|-----------|----------------|-----|--------|----------|----|----|-----|----------|-----|---------|-----|--------|-----|---------|-----|---------|
| 344 chrSm | dhaf:SMC00415  | CDS | 364184 | 365302 - | 30 | 30 | ON  | 761.33   | ON  | 734.7   | ON  | 543.81 | ON  | 623.89  | ON  | 548.24  |
| 345 chrSm | ?_SMC00416     | CDS | 365580 | 365509 + | 35 | 35 | ON  | 461.61   | ON  | 420.91  | NIL | 367.04 | ON  | 349.36  | NIL | 344.8   |
| 346 chrSm | ?_SMC00418     | CDS | 366499 | 366867 + | 30 | 30 | ON  | 391.87   | ON  | 358.87  | ON  | 598.91 | ON  | 471.48  | ON  | 396.69  |
| 347 chrSm | gsrB1:SMC00419 | CDS | 367072 | 368019 + | 30 | 30 | ON  | 421.73   | ON  | 436.77  | NIL | 327.06 | ON  | 354.87  | NIL | 370.18  |
| 348 chrSm | ?_SMC00420     | CDS | 368205 | 369737 + | 30 | 30 | ON  | 336.36   | ON  | 308.25  | NIL | 303.89 | NIL | 317.79  | NIL | 316.14  |
| 349 chrSm | cyxK1:SMC00421 | CDS | 370367 | 371335 - | 30 | 30 | ON  | 421.96   | ON  | 421.44  | NIL | 394.71 | ON  | 415.46  | NIL | 343.68  |
| 350 chrSm | ?_SMC00422     | CDS | 371474 | 372091 - | 30 | 30 | ON  | 343.67   | ON  | 339.01  | NIL | 319.73 | ON  | 346.11  | NIL | 315.82  |
| 351 chrSm | ?_SMC00423     | CDS | 372254 | 372886 + | 30 | 30 | NIL | 323.92   | ON  | 329.01  | NIL | 289.72 | NIL | 287.67  | NIL | 277.61  |
| 352 chrSm | ?_SMC00424     | CDS | 373253 | 373797 - | 30 | 30 | NIL | 302      | NIL | 331.86  | NIL | 299.11 | NIL | 310.41  | NIL | 308.13  |
| 353 chrSm | ?_SMC00425     | CDS | 373932 | 374369 + | 30 | 30 | NIL | 261.63   | NIL | 246.81  | NIL | 244.74 | NIL | 244.27  | NIL | 296.29  |
| 354 chrSm | dhaf:SMC00461  | CDS | 373932 | 374844 - | 30 | 30 | ON  | 588.93   | ON  | 474.76  | ON  | 461.19 | ON  | 455.05  | ON  | 422.47  |
| 355 chrSm | prfC:SMC00427  | CDS | 374943 | 376526 + | 30 | 30 | ON  | 588.08   | ON  | 390.98  | ON  | 497.42 | ON  | 472.77  | NIL | 374.56  |
| 356 chrSm | ?_SMC00428     | CDS | 374943 | 377399 - | 30 | 30 | ON  | 347.9    | ON  | 349.47  | NIL | 279.25 | ON  | 340.19  | NIL | 324.07  |
| 357 chrSm | ?_SMC00429     | CDS | 377524 | 378533 - | 30 | 30 | ON  | 325.34   | ON  | 351.47  | NIL | 357.37 | ON  | 361.41  | NIL | 385.5   |
| 358 chrSm | ?_SMC00430     | CDS | 378451 | 379843 + | 30 | 30 | ON  | 344.83   | ON  | 352.84  | ON  | 390.64 | NIL | 328.19  | ON  | 354.29  |
| 359 chrSm | ?_SMC00431     | CDS | 379439 | 380720 - | 30 | 30 | ON  | 449.34   | ON  | 362.09  | NIL | 415.06 | ON  | 368.26  | ON  | 379.19  |
| 360 chrSm | kDB:SMC00432   | CDS | 379920 | 380720 - | 30 | 30 | ON  | 464.71   | NIL | 292.13  | NIL | 345.03 | NIL | 309.61  | NIL | 281.86  |
| 361 chrSm | kDE:SMC00433   | CDS | 380875 | 381777 - | 30 | 30 | ON  | 857.28   | ON  | 423.1   | ON  | 442.63 | ON  | 456.35  | NIL | 359.77  |
| 362 chrSm | kID:SMC01166   | CDS | 381949 | 383802 - | 30 | 30 | ON  | 482.49   | ON  | 368.12  | NIL | 366.45 | ON  | 383.3   | NIL | 348.24  |
| 363 chrSm | kIC:SMC01165   | CDS | 383852 | 385804 - | 30 | 30 | ON  | 419.37   | ON  | 318.47  | NIL | 298.32 | NIL | 312.01  | NIL | 307.27  |
| 364 chrSm | ?_SMC01164     | CDS | 385924 | 386778 - | 30 | 30 | ON  | 367.73   | ON  | 339.11  | NIL | 289.6  | NIL | 291.33  | NIL | 329.46  |
| 365 chrSm | ?_SMC01163     | CDS | 385924 | 388218 - | 30 | 30 | ON  | 358.01   | NIL | 280.33  | NIL | 298.66 | NIL | 267     | NIL | 361.59  |
| 366 chrSm | ?_SMC01162     | CDS | 387088 | 389286 + | 30 | 30 | ON  | 367.85   | ON  | 368.07  | ON  | 373.97 | ON  | 361.59  | ON  | 385.8   |
| 367 chrSm | dtp:SMC01161   | CDS | 388470 | 390482 - | 30 | 30 | NIL | 430.42   | ON  | 483.66  | NIL | 397.58 | ON  | 463.71  | NIL | 302.84  |
| 368 chrSm | ?_SMC01160     | CDS | 389277 | 391083 + | 30 | 30 | NIL | 314.02   | NIL | 286.47  | NIL | 382.56 | ON  | 317.77  | NIL | 345.38  |
| 369 chrSm | ?_SMC01159     | CDS | 390625 | 391978 + | 30 | 30 | NIL | 395.49   | ON  | 351.55  | ON  | 314.04 | NIL | 325.29  | ON  | 334.19  |
| 370 chrSm | ?_SMC01158     | CDS | 391073 | 392701 - | 30 | 30 | ON  | 319.83   | NIL | 300.73  | NIL | 314.04 | NIL | 468.58  | ON  | 417.15  |
| 371 chrSm | ?_SMC01157     | CDS | 392096 | 393585 - | 30 | 30 | ON  | 418.14   | ON  | 386.21  | ON  | 456.38 | ON  | 314.98  | NIL | 305.47  |
| 372 chrSm | BRF:SMC01156   | CDS | 393673 | 395247 - | 30 | 30 | ON  | 319.84   | NIL | 322.38  | NIL | 315.25 | NIL | 200.09  | NIL | 304.33  |
| 373 chrSm | UBI:SMC01155   | CDS | 395252 | 396064 - | 30 | 30 | ON  | 360.27   | NIL | 311.13  | NIL | 285.75 | NIL | 280.9   | NIL | 304.33  |
| 374 chrSm | fig:SMC01154   | CDS | 396210 | 397115 + | 30 | 30 | ON  | 384.75   | ON  | 385.22  | NIL | 366.27 | NIL | 375.09  | NIL | 375.09  |
| 375 chrSm | ?_SMC01153     | CDS | 397173 | 397946 + | 30 | 30 | ON  | 462.41   | ON  | 519.74  | ON  | 423.49 | ON  | 396.44  | ON  | 431.63  |
| 376 chrSm | ?_SMC01152     | CDS | 397173 | 398404 + | 30 | 30 | ON  | 866.72   | ON  | 483.34  | ON  | 443.54 | ON  | 366.21  | ON  | 343.46  |
| 377 chrSm | dhaf:SMC01167  | CDS | 399330 | 400853 + | 30 | 30 | NIL | 1165.37  | ON  | 443.54  | ON  | 307.2  | NIL | 324.84  | NIL | 313.03  |
| 378 chrSm | ?_SMC01151     | CDS | 400977 | 401351 + | 30 | 30 | NIL | 308.81   | ON  | 341.67  | NIL | 397.27 | NIL | 334.97  | NIL | 364.11  |
| 379 chrSm | ?_SMC01150     | CDS | 401348 | 402619 + | 30 | 30 | ON  | 345.8    | ON  | 434.88  | ON  | 352.84 | NIL | 364.97  | NIL | 364.11  |
| 380 chrSm | ?_SMC01149     | CDS | 402694 | 403176 + | 30 | 30 | NIL | 292.88   | ON  | 322.61  | NIL | 352.84 | NIL | 311.95  | NIL | 330.35  |
| 381 chrSm | ?_SMC01148     | CDS | 403192 | 404058 + | 30 | 30 | ON  | 380.21   | ON  | 392.02  | ON  | 394.72 | ON  | 381.64  | NIL | 335.04  |
| 382 chrSm | ?_SMC01147     | CDS | 404075 | 405256 - | 30 | 30 | ON  | 376.34   | NIL | 310.71  | NIL | 313.28 | NIL | 318.99  | NIL | 338.79  |
| 383 chrSm | ?_SMC01146     | CDS | 405268 | 405912 - | 30 | 30 | ON  | 355.45   | ON  | 324.48  | NIL | 348.84 | NIL | 330.86  | NIL | 334.45  |
| 384 chrSm | ?_SMC01145     | CDS | 405943 | 406356 - | 30 | 30 | ON  | 534.52   | ON  | 392.78  | ON  | 416.36 | NIL | 396.83  | NIL | 396.83  |
| 385 chrSm | prfN:SMC01144  | CDS | 406593 | 407312 - | 30 | 30 | ON  | 435.82   | ON  | 377.37  | NIL | 345.63 | ON  | 341.74  | NIL | 342.82  |
| 386 chrSm | trcA:SMC01143  | CDS | 407570 | 408649 + | 30 | 30 | ON  | 424.04   | ON  | 448.99  | ON  | 435.87 | ON  | 477.79  | ON  | 423.49  |
| 387 chrSm | gPE:SMC01142   | CDS | 408808 | 409434 + | 30 | 30 | ON  | 692.07   | ON  | 358.13  | ON  | 445.16 | ON  | 384.23  | NIL | 463.82  |
| 388 chrSm | psN:SMC01141   | CDS | 409714 | 410238 - | 30 | 30 | ON  | 528.62   | ON  | 468.29  | ON  | 402.61 | ON  | 453.12  | NIL | 403.72  |
| 389 chrSm | ?_SMC01140     | CDS | 410413 | 410985 - | 30 | 30 | ON  | 1168.14  | ON  | 2241.79 | ON  | 989.4  | ON  | 1318.69 | ON  | 1232.45 |
| 390 chrSm | ppN:SMC01139   | CDS | 411264 | 412808 - | 30 | 30 | ON  | 329.8    | ON  | 338.12  | NIL | 303.23 | NIL | 320.1   | NIL | 307.62  |
| 391 chrSm | ?_SMC01138     | CDS | 412984 | 413796 - | 30 | 30 | ON  | 533.74   | ON  | 445.71  | NIL | 345.26 | ON  | 374.07  | NIL | 370.18  |
| 392 chrSm | ?_SMC01137     | CDS | 413810 | 414370 - | 30 | 30 | ON  | 488.27   | ON  | 378.25  | NIL | 307.47 | ON  | 345.37  | NIL | 312.25  |
| 393 chrSm | ?_SMC01136     | CDS | 414402 | 415070 - | 30 | 30 | ON  | 409.03   | NIL | 315.98  | NIL | 357.36 | ON  | 373.77  | NIL | 369.55  |
| 394 chrSm | ?_SMC01135     | CDS | 415411 | 416370 + | 30 | 30 | ON  | 459.35   | ON  | 443.21  | NIL | 371.63 | ON  | 413.99  | NIL | 343.43  |
| 395 chrSm | trfB:SMC01134  | CDS | 416474 | 416785 + | 30 | 30 | ON  | 1093.73  | ON  | 1275.21 | NIL | 572    | ON  | 942.51  | ON  | 610.7   |
| 396 chrSm | ?_SMC01133     | CDS | 416966 | 417310 + | 30 | 30 | NIL | 299.56   | ON  | 381.69  | NIL | 362.57 | ON  | 425.56  | NIL | 347.54  |
| 397 chrSm | ?_SMC01132     | CDS | 417338 | 417796 - | 30 | 30 | NIL | 299.56   | ON  | 381.69  | NIL | 276.97 | ON  | 361.57  | NIL | 293.53  |
| 398 chrSm | ?_SMC01131     | CDS | 417869 | 419123 + | 30 | 30 | ON  | 492.19   | ON  | 489.94  | NIL | 366.2  | ON  | 404.51  | NIL | 345.65  |
| 399 chrSm | ?_SMC01130     | CDS | 419120 | 419986 + | 31 | 31 | ON  | 439.99   | ON  | 404.15  | NIL | 355.65 | ON  | 352.39  | NIL | 343.58  |
| 400 chrSm | lbpA:SMC01129  | CDS | 419883 | 420483 + | 30 | 30 | ON  | 344.66   | ON  | 404.15  | NIL | 278.67 | NIL | 295.96  | ON  | 306.96  |
| 401 chrSm | ?_SMC01128     | CDS | 420888 | 423080 + | 30 | 30 | ON  | 483.86   | ON  | 403.95  | ON  | 388.78 | ON  | 463.61  | NIL | 388.78  |
| 402 chrSm | ?_SMC01127     | CDS | 423198 | 424367 - | 30 | 30 | NIL | 307.74   | ON  | 332.96  | NIL | 357.58 | ON  | 345.49  | NIL | 359.45  |
| 403 chrSm | trmS:SMC01126  | CDS | 424657 | 426652 - | 30 | 30 | ON  | 513.26   | ON  | 414.43  | ON  | 413.19 | ON  | 462.51  | NIL | 462.51  |
| 404 chrSm | mutS:SMC01125  | CDS | 426755 | 429505 + | 30 | 30 | ON  | 389.75   | ON  | 347.42  | ON  | 376.5  | ON  | 382.4   | NIL | 342.35  |
| 405 chrSm | gnd:SMC01124   | CDS | 429607 | 432450 + | 30 | 30 | NIL | 285.94   | NIL | 305.73  | NIL | 309.16 | NIL | 282.04  | NIL | 323.5   |
| 406 chrSm | trvN:SMC01123  | CDS | 432453 | 434060 + | 32 | 32 | ON  | 365      | ON  | 351.19  | NIL | 360.08 | NIL | 335.68  | NIL | 319.1   |
| 407 chrSm | ?_SMC01122     | CDS | 434057 | 434446 + | 30 | 30 | ON  | 330.05   | ON  | 322.33  | NIL | 285.09 | NIL | 276.19  | ON  | 338.28  |
| 408 chrSm | trpS:SMC01121  | CDS | 434538 | 435602 + | 30 | 30 | ON  | 687.8    | ON  | 400.31  | NIL | 364.73 | ON  | 390.76  | NIL | 333.8   |
| 409 chrSm | ?_SMC01120     | CDS | 435679 | 436746 + | 30 | 30 | ON  | 480.06   | ON  | 425.11  | ON  | 425.46 | ON  | 443.96  | NIL | 381.42  |
| 410 chrSm | ?_SMC01119     | CDS | 436505 | 436871 + | 30 | 30 | ON  | 408.14   | ON  | 499.46  | NIL | 340.96 | ON  | 372.38  | NIL | 366.35  |
| 411 chrSm | ?_SMC01118     | CDS | 437108 | 437764 + | 30 | 30 | ON  | 456.37   | ON  | 371.62  | NIL | 386.71 | ON  | 349.42  | NIL | 346.38  |
| 412 chrSm | trmI:SMC01117  | CDS | 437819 | 438322 + | 30 | 30 | NIL | 220.65   | NIL | 232.03  | NIL | 242.78 | ON  | 226.72  | NIL | 258.63  |
| 413 chrSm | oka:SMC01116   | CDS | 438442 | 439320 + | 30 | 30 | ON  | 376.06   | ON  | 337.21  | NIL | 321.29 | NIL | 327.5   | NIL | 342.21  |
| 414 chrSm | ?_SMC01115     | CDS | 439370 | 440788 + | 30 | 30 | ON  | 440.88 + | ON  | 383.39  | NIL | 376.58 | ON  | 359.27  | NIL | 362.11  |
| 415 chrSm | ?_SMC01114     | CDS | 440793 | 441848 + | 30 | 30 | ON  | 401.06   | ON  | 387.42  | ON  | 392.6  | ON  | 403.37  | NIL | 325.47  |

|           |                    |      |        |          |    |    |     |         |     |        |     |        |     |        |     |        |
|-----------|--------------------|------|--------|----------|----|----|-----|---------|-----|--------|-----|--------|-----|--------|-----|--------|
| 416 chrSm | 2:SMC01113         | CDS  | 441865 | 442371 + | 30 | 30 | ON  | 386.8   | ON  | 406.8  | NIL | 300.59 | NIL | 303.72 | NIL | 314.75 |
| 417 chrSm | 2:SMC01112         | CDS  | 442384 | 443547 + | 30 | 30 | ON  | 490.35  | ON  | 399.02 | ON  | 403.48 | ON  | 411.25 | NIL | 374.67 |
| 419 chrSm | Int:SMC01111       | CDS  | 443701 | 445296 + | 30 | 30 | ON  | 501.38  | ON  | 415.75 | ON  | 398.64 | ON  | 418.4  | ON  | 407.3  |
| 420 chrSm | phr:SMC01110       | CDS  | 445435 | 445854 + | 30 | 30 | ON  | 459.64  | ON  | 446.65 | ON  | 403.26 | ON  | 507.25 | ON  | 390.67 |
| 421 chrSm | meK:SMC01109       | CDS  | 446191 | 447471 + | 30 | 30 | ON  | 751.47  | ON  | 355.4  | ON  | 590.34 | ON  | 800.88 | ON  | 568.18 |
| 422 chrSm | 2:SMC01108         | CDS  | 447637 | 448392 + | 30 | 30 | ON  | 488.55  | ON  | 381.68 | ON  | 376.61 | ON  | 403.65 | NIL | 339.25 |
| 423 chrSm | 2:SMC01106         | CDS  | 448527 | 448784 - | 30 | 30 | ON  | 445.56  | ON  | 599.79 | NIL | 353.77 | ON  | 726.71 | NIL | 345.49 |
| 424 chrSm | 2:SMC01105         | CDS  | 448833 | 449264 - | 30 | 30 | ON  | 487     | ON  | 459.08 | ON  | 400.09 | ON  | 460.47 | NIL | 352.79 |
| 425 chrSm | mcpx:SMC01104      | CDS  | 450468 | 450373 + | 30 | 30 | ON  | 550.1   | ON  | 471.26 | ON  | 418.89 | ON  | 440.47 | ON  | 395.08 |
| 426 chrSm | rbxK:SMC01103      | CDS  | 452834 | 452834 - | 30 | 30 | ON  | 382.89  | ON  | 331.82 | ON  | 479.4  | ON  | 438.48 | ON  | 429.09 |
| 427 chrSm | def1:SMC01102      | CDS  | 453189 | 454088 - | 30 | 30 | ON  | 405.2   | ON  | 341.26 | ON  | 409.63 | ON  | 373.73 | ON  | 378.85 |
| 428 chrSm | 2:SMC01101         | CDS  | 454194 | 455399 - | 30 | 30 | ON  | 907.47  | ON  | 413.03 | NIL | 369.49 | ON  | 383.5  | ON  | 387.59 |
| 429 chrSm | fmt:SMC01100       | CDS  | 455537 | 456073 + | 30 | 30 | ON  | 425.57  | ON  | 399.19 | ON  | 425.57 | ON  | 378.01 | NIL | 391.94 |
| 430 chrSm | ttuA:SMC01099      | CDS  | 456143 | 457078 + | 30 | 30 | ON  | 339.44  | ON  | 326.57 | NIL | 294.02 | NIL | 280.83 | ON  | 298.71 |
| 431 chrSm | Trn1 9C:SMC01098   | CDS  | 457959 | 459564 - | 33 | 0  | ON  | 389.57  | ON  | 325.94 | NIL | 291.61 | NIL | 358.87 | NIL | 317.95 |
| 432 chrSm | Trn1 9A:SMC01394   | CDS  | 458431 | 458886 - | 39 | 0  | ON  | 414.29  | NIL | 299.01 | NIL | 315.89 | ON  | 344.81 | NIL | 297.74 |
| 433 chrSm | 2:SMC01097         | CDS  | 459140 | 459736 - | 30 | 30 | NIL | 293.52  | NIL | 306.44 | NIL | 283.79 | NIL | 286.12 | NIL | 300.31 |
| 434 chrSm | dape:SMC01096      | CDS  | 459723 | 460916 - | 30 | 30 | ON  | 399.59  | ON  | 356.98 | ON  | 436.26 | ON  | 420.99 | NIL | 418.81 |
| 435 chrSm | meK1:SMC01095      | CDS  | 461103 | 462488 - | 30 | 30 | ON  | 453.77  | ON  | 400.71 | NIL | 352.73 | ON  | 381.2  | NIL | 353.61 |
| 436 chrSm | 2:SMC01094         | CDS  | 464417 | 465625 - | 30 | 30 | ON  | 415.55  | ON  | 373.93 | ON  | 423.07 | ON  | 384.43 | ON  | 429.04 |
| 437 chrSm | 2:SMC01093         | CDS  | 465477 | 466492 - | 30 | 30 | ON  | 355.31  | NIL | 315.58 | ON  | 400.81 | ON  | 358.3  | NIL | 317.32 |
| 438 chrSm | 2:SMC01092         | CDS  | 466650 | 467540 + | 30 | 30 | ON  | 332.31  | NIL | 352.44 | NIL | 367.43 | ON  | 347.56 | ON  | 339.41 |
| 439 chrSm | 2:SMC01091         | CDS  | 467551 | 467694 - | 30 | 30 | NIL | 314.25  | NIL | 312    | ON  | 491.93 | ON  | 397.38 | NIL | 408.88 |
| 440 chrSm | dead:SMC01090      | CDS  | 467773 | 469665 - | 30 | 30 | ON  | 430.46  | ON  | 357.84 | NIL | 365.13 | ON  | 336.07 | NIL | 372.95 |
| 441 chrSm | 2:SMC01089         | CDS  | 469818 | 470204 - | 30 | 30 | ON  | 521.06  | ON  | 424.9  | NIL | 334.95 | ON  | 328.1  | NIL | 360.77 |
| 442 chrSm | dapD:SMC01732      | CDS  | 470207 | 471097 - | 30 | 30 | ON  | 587     | ON  | 441.62 | ON  | 437.19 | ON  | 406.63 | ON  | 409.95 |
| 443 chrSm | 2:SMC01731         | CDS  | 471359 | 472258 + | 30 | 30 | ON  | 605.08  | ON  | 401.83 | NIL | 352.09 | NIL | 330.02 | NIL | 320.51 |
| 444 chrSm | 2:SMC01730         | CDS  | 472329 | 473105 - | 30 | 30 | ON  | 406.06  | ON  | 333.4  | NIL | 323.65 | ON  | 366.73 | NIL | 323.92 |
| 445 chrSm | 2:SMC01729         | CDS  | 473140 | 474054 + | 30 | 30 | ON  | 355.21  | ON  | 348.96 | NIL | 339.14 | NIL | 336.71 | NIL | 333.93 |
| 446 chrSm | adu:SMC01728       | CDS  | 474128 | 475240 + | 30 | 30 | ON  | 347.29  | ON  | 337.87 | NIL | 343.07 | NIL | 347.64 | NIL | 316.42 |
| 447 chrSm | 2:SMC01727         | CDS  | 475278 | 476048 + | 30 | 30 | ON  | 335.68  | ON  | 388.9  | ON  | 409.45 | ON  | 354.88 | ON  | 422.33 |
| 448 chrSm | argB:SMC01726      | CDS  | 476243 | 477130 - | 30 | 30 | ON  | 597.97  | ON  | 509.01 | ON  | 438.86 | ON  | 547.89 | ON  | 392.28 |
| 449 chrSm | 2:SMC01725         | CDS  | 477420 | 478133 + | 30 | 30 | ON  | 387.89  | ON  | 412.08 | ON  | 397.06 | ON  | 407.14 | NIL | 363.78 |
| 450 chrSm | 2:SMC01724         | CDS  | 478241 | 478733 + | 30 | 30 | NIL | 292.45  | NIL | 304.94 | NIL | 317.92 | NIL | 271.81 | NIL | 305.09 |
| 451 chrSm | 2:SMC01723         | CDS  | 478809 | 479348 - | 30 | 30 | NIL | 285.8   | NIL | 315.21 | NIL | 281.22 | NIL | 285.16 | NIL | 320.25 |
| 452 chrSm | 2:SMC01722         | CDS  | 479477 | 480130 - | 30 | 30 | ON  | 380.82  | ON  | 365.67 | NIL | 325.63 | NIL | 330.96 | NIL | 330.96 |
| 453 chrSm | 2:SMC01721         | CDS  | 480482 | 482269 - | 31 | 31 | ON  | 875.13  | ON  | 628.52 | ON  | 492.45 | ON  | 491.83 | ON  | 415.86 |
| 454 chrSm | mpa:SMC04434       | CDS  | 482266 | 482652 - | 30 | 30 | ON  | 1606.16 | ON  | 718.94 | ON  | 492.45 | ON  | 598.28 | ON  | 499.19 |
| 455 chrSm | trpH:SMC0434       | CDS  | 482686 | 482820 - | 30 | 30 | ON  | 477.88  | ON  | 349.94 | NIL | 268.65 | ON  | 368.44 | NIL | 316.63 |
| 456 chrSm | trpT:SMC01719      | CDS  | 483128 | 485125 + | 30 | 30 | ON  | 387.31  | ON  | 326.87 | NIL | 351.2  | ON  | 509.47 | NIL | 354.43 |
| 457 chrSm | 2:SMC01718         | CDS  | 485369 | 486169 + | 30 | 30 | ON  | 332.68  | ON  | 362.19 | NIL | 315.27 | ON  | 351.3  | NIL | 296.8  |
| 458 chrSm | meA1:SMC01717      | CDS  | 486192 | 487613 + | 30 | 30 | ON  | 353.07  | ON  | 336.99 | NIL | 349.46 | NIL | 345.71 | NIL | 363.63 |
| 459 chrSm | 2:SMC01716         | CDS  | 487688 | 489208 + | 30 | 30 | ON  | 363.68  | ON  | 365.89 | NIL | 335.96 | NIL | 329.9  | NIL | 360.93 |
| 460 chrSm | trnAARG-2:SMC01733 | trnA | 489328 | 489404 + | 30 | 30 | ON  | 363.2   | NIL | 323.92 | NIL | 339.78 | NIL | 297.07 | ON  | 461.81 |
| 461 chrSm | 2:SMC01715         | CDS  | 489742 | 490437 - | 30 | 30 | ON  | 320.55  | ON  | 340.09 | NIL | 339.35 | NIL | 377.84 | NIL | 332.22 |
| 462 chrSm | 2:SMC01714         | CDS  | 490630 | 491118 + | 30 | 30 | ON  | 195.9   | NIL | 299.22 | NIL | 313.56 | NIL | 298.5  | NIL | 317.74 |
| 463 chrSm | 2:SMC01713         | CDS  | 491327 | 491944 + | 30 | 30 | ON  | 596.23  | ON  | 350.82 | NIL | 364.61 | NIL | 320.17 | NIL | 316.46 |
| 464 chrSm | lhd2:SMC01712      | CDS  | 491966 | 493177 + | 30 | 30 | ON  | 514.3   | ON  | 405.79 | ON  | 397.91 | NIL | 371.53 | NIL | 374.4  |
| 465 chrSm | 2:SMC01711         | CDS  | 493804 | 496527 + | 30 | 30 | NIL | 307.24  | NIL | 298.41 | NIL | 355.83 | NIL | 312.52 | NIL | 361.9  |
| 466 chrSm | 2:SMC01710         | CDS  | 496646 | 501478 + | 48 | 48 | ON  | 292.51  | ON  | 299.53 | NIL | 289.9  | ON  | 307.89 | NIL | 329.88 |
| 467 chrSm | 2:SMC01709         | CDS  | 501270 | 501773 + | 31 | 31 | NIL | 287.47  | NIL | 302.53 | NIL | 289.9  | NIL | 304.01 | NIL | 295.4  |
| 468 chrSm | 2:SMC01708         | CDS  | 502436 | 505431 + | 30 | 30 | ON  | 329.39  | ON  | 345.32 | NIL | 378.24 | ON  | 361.73 | ON  | 390.03 |
| 469 chrSm | 2:SMC01707         | CDS  | 506320 | 506889 + | 30 | 30 | ON  | 319.27  | NIL | 317.5  | NIL | 338.74 | ON  | 345.05 | ON  | 378.84 |
| 470 chrSm | 2:SMC01706         | CDS  | 506999 | 507574 + | 30 | 30 | ON  | 324.76  | NIL | 313.17 | NIL | 327.61 | NIL | 302.41 | ON  | 345.05 |
| 471 chrSm | 2:SMC01705         | CDS  | 507611 | 508081 - | 30 | 30 | ON  | 331.5   | ON  | 326.74 | NIL | 286.74 | NIL | 302.41 | ON  | 323.64 |
| 472 chrSm | 2:SMC01704         | CDS  | 508266 | 508943 - | 30 | 30 | NIL | 307.7   | ON  | 376.63 | NIL | 292.67 | NIL | 387.96 | NIL | 317.83 |
| 473 chrSm | 2:SMC01703         | CDS  | 509457 | 509888 - | 30 | 30 | NIL | 336.12  | NIL | 330.7  | NIL | 288.95 | NIL | 271.39 | NIL | 288.95 |
| 474 chrSm | 2:SMC01702         | CDS  | 509911 | 510897 - | 30 | 30 | ON  | 473.57  | ON  | 481.75 | NIL | 308.77 | NIL | 333.33 | NIL | 308.41 |
| 475 chrSm | 2:SMC01701         | CDS  | 510986 | 511570 - | 30 | 30 | ON  | 364.31  | ON  | 344.83 | NIL | 349.13 | ON  | 434.31 | ON  | 403.97 |
| 476 chrSm | putA:SMC02181      | CDS  | 511820 | 515521 - | 30 | 30 | ON  | 512.66  | ON  | 370.38 | ON  | 322.32 | NIL | 329.39 | NIL | 328.21 |
| 477 chrSm | 2:SMC02180         | CDS  | 515708 | 516022 - | 30 | 30 | ON  | 369.01  | ON  | 364.36 | ON  | 391.33 | NIL | 327.69 | NIL | 368.21 |
| 478 chrSm | 2:SMC02179         | CDS  | 516081 | 516887 - | 30 | 30 | ON  | 331.5   | ON  | 374.45 | ON  | 380.93 | ON  | 381.5  | NIL | 335.77 |
| 479 chrSm | 2:SMC02178         | CDS  | 516999 | 517460 - | 30 | 30 | ON  | 320.8   | NIL | 305.54 | NIL | 378.46 | ON  | 372.49 | NIL | 326.48 |
| 480 chrSm | 2:SMC02177         | CDS  | 517659 | 518273 + | 30 | 30 | ON  | 379.47  | ON  | 397.86 | ON  | 479.11 | ON  | 393.81 | ON  | 319.23 |
| 481 chrSm | crd1:SMC02176      | CDS  | 518501 | 520372 - | 30 | 30 | ON  | 358.67  | ON  | 373.49 | NIL | 326.97 | ON  | 359.36 | NIL | 392.63 |
| 482 chrSm | 2:SMC02175         | CDS  | 520434 | 521138 - | 30 | 30 | ON  | 332.27  | ON  | 332.97 | NIL | 315.52 | ON  | 375.23 | NIL | 322.98 |
| 483 chrSm | 2:SMC02174         | CDS  | 521374 | 521811 + | 30 | 30 | ON  | 366.29  | ON  | 388.1  | NIL | 315.52 | ON  | 376.89 | NIL | 349.78 |
| 484 chrSm | 2:SMC02173         | CDS  | 521878 | 522306 - | 30 | 30 | NIL | 304.52  | NIL | 312.32 | NIL | 332.47 | ON  | 358.11 | NIL | 358.69 |
| 485 chrSm | 2:SMC02172         | CDS  | 522311 | 523540 - | 30 | 30 | ON  | 323.12  | NIL | 315.56 | NIL | 361.5  | ON  | 341.86 | NIL | 348.94 |
| 486 chrSm | 2:SMC02171         | CDS  | 523892 | 524917 + | 30 | 30 | ON  | 360.46  | ON  | 725.42 | ON  | 474.22 | ON  | 702.75 | NIL | 418.66 |
| 487 chrSm | 2:SMC02170         | CDS  | 525199 | 526281 + | 31 | 31 | ON  | 330.6   | ON  | 495.31 | NIL | 359.04 | ON  | 374.81 | NIL | 337.59 |

|           |                     |      |          |          |    |    |     |        |     |        |     |        |     |        |
|-----------|---------------------|------|----------|----------|----|----|-----|--------|-----|--------|-----|--------|-----|--------|
| 488 chrSm | 2: SMC02169         | CDS  | 526281   | 527063 + | 30 | 30 | ON  | 340.97 | NIL | 291.16 | NIL | 316.65 | NIL | 302.32 |
| 489 chrSm | 2: SMC02167         | CDS  | 527060   | 527080 + | 30 | 30 | ON  | 345.72 | NIL | 313.27 | NIL | 309.84 | NIL | 305.54 |
| 490 chrSm | pyrc: SMC02166      | CDS  | 527870   | 528913 + | 30 | 30 | ON  | 471.44 | NIL | 361.6  | ON  | 387.69 | NIL | 364.16 |
| 491 chrSm | pyre: SMC02165      | CDS  | 528931   | 529629 + | 30 | 30 | ON  | 544.82 | ON  | 431.95 | NIL | 415.04 | NIL | 337.05 |
| 492 chrSm | tkr: SMC02164       | CDS  | 529686   | 530612 + | 30 | 30 | ON  | 545.82 | ON  | 362.98 | ON  | 401.18 | NIL | 360.48 |
| 493 chrSm | pgl: SMC02163       | CDS  | 530745   | 532370 - | 30 | 30 | ON  | 545.23 | ON  | 588.22 | ON  | 406.14 | ON  | 430.19 |
| 494 chrSm | fadD: SMC02162      | CDS  | 532686   | 534386 - | 30 | 30 | ON  | 390.48 | ON  | 386.7  | NIL | 457.33 | NIL | 329.91 |
| 495 chrSm | 2: SMC02161         | CDS  | 534724   | 535959 + | 30 | 30 | ON  | 334.19 | ON  | 339.64 | NIL | 309.7  | NIL | 311.64 |
| 496 chrSm | 2: SMC02160         | CDS  | 536151   | 537329 + | 30 | 30 | ON  | 415.99 | ON  | 411.41 | NIL | 381.04 | NIL | 349.14 |
| 497 chrSm | 2: SMC02159         | CDS  | 537425   | 538090 + | 30 | 30 | ON  | 313.93 | NIL | 307.28 | NIL | 283.99 | NIL | 313.49 |
| 498 chrSm | 2: SMC02158         | CDS  | 538087   | 538698 + | 30 | 30 | ON  | 340.74 | NIL | 306.61 | NIL | 371.07 | NIL | 358.53 |
| 499 chrSm | 2: SMC02157         | CDS  | 539647 + | 539647 + | 30 | 30 | NIL | 272.41 | NIL | 300.66 | NIL | 278.2  | NIL | 331.16 |
| 500 chrSm | 2: SMC02156         | CDS  | 539798   | 540595 + | 30 | 30 | ON  | 363.83 | ON  | 332.17 | ON  | 332.17 | ON  | 319.58 |
| 501 chrSm | 2: SMC02187         | CDS  | 540915   | 542123 + | 30 | 30 | ON  | 333.44 | ON  | 344.61 | NIL | 414.09 | ON  | 390.97 |
| 502 chrSm | 2: SMC02182         | CDS  | 542113   | 542955 + | 30 | 30 | NIL | 309.1  | ON  | 346.76 | NIL | 346.21 | ON  | 377.64 |
| 503 chrSm | 2: SMC02201         | CDS  | 543112   | 543309 + | 30 | 30 | NIL | 281.29 | NIL | 294.87 | NIL | 274.91 | ON  | 307.75 |
| 504 chrSm | 2: SMC02189         | CDS  | 545715   | 545969 - | 30 | 30 | NIL | 293.9  | ON  | 362.42 | ON  | 282.89 | NIL | 299    |
| 505 chrSm | 2: SMC02200         | CDS  | 545971   | 546495 - | 30 | 30 | NIL | 238.08 | ON  | 289.51 | NIL | 444.79 | NIL | 368.88 |
| 506 chrSm | 2: SMC02184         | CDS  | 546632   | 546901 + | 30 | 30 | NIL | 268.84 | NIL | 262.67 | NIL | 268.84 | NIL | 283.27 |
| 507 chrSm | 2: SMC02199         | CDS  | 547181   | 547675 + | 30 | 30 | ON  | 410.58 | ON  | 418.92 | ON  | 424.67 | ON  | 450.53 |
| 508 chrSm | 2: SMC02155         | CDS  | 547672   | 548811 + | 30 | 30 | ON  | 327.18 | ON  | 418.92 | NIL | 424.67 | ON  | 450.53 |
| 509 chrSm | 2: SMC02154         | CDS  | 548970   | 551798 - | 30 | 30 | ON  | 399.55 | ON  | 452    | ON  | 455.88 | ON  | 439.06 |
| 510 chrSm | 2: SMC02154         | CDS  | 551813   | 554713 - | 30 | 30 | ON  | 468.63 | ON  | 401.6  | ON  | 455.88 | ON  | 439.06 |
| 511 chrSm | 2: SMC04429         | CDS  | 554710   | 555357 - | 30 | 30 | ON  | 381.7  | NIL | 327.76 | NIL | 347.44 | NIL | 331.16 |
| 512 chrSm | 2: SMC02153         | CDS  | 555359   | 555690 - | 30 | 30 | ON  | 396.86 | ON  | 330.04 | NIL | 386.98 | ON  | 289.18 |
| 513 chrSm | 2: SMC02152         | CDS  | 556687   | 560199 - | 30 | 30 | ON  | 392    | ON  | 333.53 | NIL | 321.6  | NIL | 319.58 |
| 514 chrSm | 2: SMC02151         | CDS  | 560247   | 560579 - | 30 | 30 | ON  | 430.66 | ON  | 357.28 | NIL | 346.69 | ON  | 386.65 |
| 515 chrSm | trnATHR:1: SMC02183 | trNA | 561409   | 561484 - | 30 | 30 | ON  | 335.55 | ON  | 340.41 | NIL | 344.19 | ON  | 345.33 |
| 516 chrSm | 2: SMC02150         | CDS  | 561561   | 562571 - | 30 | 30 | ON  | 434.41 | ON  | 380.81 | NIL | 328.05 | ON  | 313.33 |
| 517 chrSm | 2: SMC02149         | CDS  | 562964   | 564124 + | 30 | 30 | ON  | 332.95 | ON  | 360.98 | ON  | 374.28 | NIL | 318.47 |
| 518 chrSm | 2: SMC02148         | CDS  | 564142   | 565054 + | 30 | 30 | ON  | 397.31 | ON  | 391.22 | NIL | 346.32 | NIL | 335.52 |
| 519 chrSm | phoR: SMC02147      | CDS  | 565258   | 566520 + | 30 | 30 | ON  | 368.02 | ON  | 411.95 | ON  | 424.09 | NIL | 364.76 |
| 520 chrSm | 2: SMC02146         | CDS  | 566715   | 567749 + | 30 | 30 | ON  | 351.29 | ON  | 337.23 | NIL | 424.09 | NIL | 349.23 |
| 521 chrSm | 2: SMC02145         | CDS  | 567841   | 568446 + | 32 | 32 | ON  | 476.29 | ON  | 391.31 | NIL | 347.66 | NIL | 367.1  |
| 522 chrSm | psrC: SMC02144      | CDS  | 569321   | 569324 + | 30 | 30 | ON  | 440.87 | ON  | 350.67 | NIL | 444.76 | NIL | 309.68 |
| 523 chrSm | psrA: SMC02143      | CDS  | 5698413  | 570643 + | 30 | 30 | ON  | 341.87 | ON  | 326.31 | NIL | 444.76 | NIL | 309.68 |
| 524 chrSm | psrB: SMC02142      | CDS  | 570637   | 571472 + | 30 | 30 | ON  | 359.84 | ON  | 339.68 | NIL | 329.67 | NIL | 321.01 |
| 525 chrSm | phoU: SMC02141      | CDS  | 571559   | 572272 + | 30 | 30 | ON  | 419.94 | ON  | 329.37 | NIL | 334.27 | NIL | 319.03 |
| 526 chrSm | phoB: SMC02140      | CDS  | 572383   | 573066 + | 30 | 30 | ON  | 381.02 | ON  | 354.77 | NIL | 379.26 | NIL | 379.26 |
| 527 chrSm | 2: SMC02139         | CDS  | 573161   | 573682 + | 30 | 30 | ON  | 601.09 | ON  | 618.35 | ON  | 329.77 | NIL | 369.53 |
| 528 chrSm | argD: SMC02138      | CDS  | 573693   | 575292 + | 30 | 30 | ON  | 549.44 | ON  | 491.81 | ON  | 377.01 | NIL | 328.5  |
| 529 chrSm | argF1: SMC02137     | CDS  | 575367   | 576278 + | 30 | 30 | ON  | 423.07 | ON  | 349.69 | ON  | 443.74 | ON  | 405.76 |
| 530 chrSm | 2: SMC02136         | CDS  | 576645   | 577637 + | 30 | 30 | ON  | 378.39 | ON  | 369.06 | NIL | 436.27 | ON  | 388.4  |
| 531 chrSm | apag: SMC02135      | CDS  | 577654   | 578046 - | 30 | 30 | ON  | 365.49 | ON  | 423.87 | NIL | 403.32 | ON  | 379.55 |
| 532 chrSm | 2: SMC02134         | CDS  | 578236   | 578847 + | 30 | 30 | NIL | 285.3  | ON  | 353.19 | NIL | 403.32 | ON  | 388.4  |
| 533 chrSm | meiz: SMC02217      | CDS  | 578883   | 580067 - | 30 | 30 | ON  | 585.21 | ON  | 449.62 | ON  | 556.21 | ON  | 562.35 |
| 534 chrSm | 2: SMC02218         | CDS  | 580265   | 581362 + | 30 | 30 | ON  | 408.34 | ON  | 382.55 | NIL | 556.21 | ON  | 562.35 |
| 535 chrSm | trnAGLY:2: SMC02206 | trNA | 581412   | 581486 + | 30 | 30 | ON  | 312.55 | NIL | 311.25 | NIL | 298.52 | NIL | 327.49 |
| 536 chrSm | 2: SMC02219         | CDS  | 581564   | 582349 + | 30 | 30 | ON  | 320.85 | ON  | 320.76 | NIL | 372.36 | NIL | 280.56 |
| 537 chrSm | 2: SMC02220         | CDS  | 582385   | 583197 - | 30 | 30 | ON  | 321.2  | NIL | 348.57 | NIL | 326.89 | NIL | 326.89 |
| 538 chrSm | 2: SMC02221         | CDS  | 583276   | 583686 - | 30 | 30 | NIL | 278.32 | NIL | 268.33 | NIL | 309.99 | NIL | 340.13 |
| 539 chrSm | 2: SMC02222         | CDS  | 583799   | 584605 - | 30 | 30 | NIL | 399.26 | ON  | 342.6  | ON  | 270.23 | NIL | 423.3  |
| 540 chrSm | 2: SMC02223         | CDS  | 585415   | 585971 - | 30 | 30 | NIL | 295.9  | ON  | 317.4  | ON  | 298.81 | NIL | 319.11 |
| 541 chrSm | trnAA: SMC02224     | CDS  | 585497   | 586582 + | 30 | 30 | NIL | 263.96 | NIL | 307.24 | NIL | 270.62 | NIL | 288.78 |
| 542 chrSm | 2: SMC02225         | CDS  | 586464   | 587211 - | 30 | 30 | NIL | 282.36 | NIL | 304.5  | NIL | 273.75 | NIL | 288.78 |
| 543 chrSm | 2: SMC02226         | CDS  | 587336   | 587809 + | 30 | 30 | NIL | 349.29 | ON  | 361.09 | ON  | 275.29 | NIL | 306.48 |
| 544 chrSm | fadB: SMC02227      | CDS  | 587900   | 590713 - | 30 | 30 | ON  | 349.14 | ON  | 405.9  | ON  | 353.67 | NIL | 333.79 |
| 545 chrSm | fadA: SMC02228      | CDS  | 590135   | 591343 - | 30 | 30 | ON  | 379.14 | ON  | 409.2  | NIL | 353.25 | ON  | 363.91 |
| 546 chrSm | 2: SMC02229         | CDS  | 591449   | 593245 - | 30 | 30 | ON  | 391.8  | ON  | 400.49 | NIL | 363.25 | ON  | 356.59 |
| 547 chrSm | 2: SMC02230         | CDS  | 593695   | 596577 + | 30 | 30 | ON  | 316.48 | ON  | 341.73 | NIL | 341.75 | NIL | 330.46 |
| 548 chrSm | 2: SMC02231         | CDS  | 596668   | 597357 + | 30 | 30 | ON  | 484.27 | ON  | 522.77 | ON  | 448.05 | ON  | 447.74 |
| 549 chrSm | 2: SMC02232         | CDS  | 597695   | 598621 + | 30 | 30 | ON  | 357.96 | ON  | 351.54 | NIL | 388.91 | NIL | 335.94 |
| 550 chrSm | 2: SMC02234         | CDS  | 598621   | 599424 + | 30 | 30 | ON  | 392.65 | ON  | 396.64 | NIL | 336.75 | NIL | 305.32 |
| 551 chrSm | 2: SMC02235         | CDS  | 599523   | 599759 + | 30 | 30 | ON  | 333.84 | ON  | 336.43 | NIL | 302.44 | ON  | 349.84 |
| 552 chrSm | 2: SMC02236         | CDS  | 599797   | 600607 - | 30 | 30 | ON  | 534.28 | ON  | 461.13 | NIL | 340.67 | NIL | 299.8  |
| 553 chrSm | 2: SMC02237         | CDS  | 600851   | 603400 - | 30 | 30 | ON  | 358.04 | ON  | 374.29 | NIL | 320.99 | ON  | 334.68 |
| 554 chrSm | 2: SMC02238         | CDS  | 603508   | 604014 + | 30 | 30 | NIL | 336.86 | ON  | 383.91 | NIL | 333.39 | NIL | 335.54 |
| 555 chrSm | 2: SMC02239         | CDS  | 604053   | 604514 + | 30 | 30 | NIL | 300.32 | ON  | 350.45 | NIL | 335.54 | NIL | 305.72 |
| 556 chrSm | 2: SMC02240         | CDS  | 604544   | 605179 - | 30 | 30 | NIL | 306.31 | ON  | 352.79 | NIL | 346.64 | NIL | 335.51 |
| 557 chrSm | 2: SMC02241         | CDS  | 604544   | 605626 - | 30 | 30 | ON  | 318.34 | NIL | 299.49 | NIL | 318.15 | NIL | 320.88 |
| 558 chrSm | 2: SMC02242         | CDS  | 606288   | 606640 - | 30 | 30 | ON  | 357.81 | NIL | 353.08 | NIL | 251.7  | NIL | 284.19 |
| 559 chrSm | 2: SMC02243         | CDS  | 606643   | 607146 + | 30 | 30 | NIL | 305.7  | ON  | 359.88 | NIL | 329.15 | NIL | 340.17 |
|           |                     |      |          |          | 30 | 30 | ON  | 497.73 | ON  | 454.49 | NIL | 299.26 | NIL | 316.69 |

|           |                     |      |        |           |    |    |     |        |     |        |     |        |     |        |     |        |
|-----------|---------------------|------|--------|-----------|----|----|-----|--------|-----|--------|-----|--------|-----|--------|-----|--------|
| 560 chrSm | dhfr: SMC02244      | CDS  | 607193 | 608560 +  | 31 | 31 | ON  | 383.36 | ON  | 392.73 | NIL | 349.56 | ON  | 357.18 | NIL | 351.09 |
| 561 chrSm | pyrD: SMC02245      | CDS  | 608536 | 609624 -  | 30 | 30 | ON  | 457.24 | ON  | 394.04 | NIL | 403.66 | ON  | 425.61 | ON  | 396.31 |
| 562 chrSm | ?_SMC02246          | CDS  | 609621 | 609968 -  | 30 | 30 | ON  | 490.89 | ON  | 434.78 | NIL | 349.38 | ON  | 415.46 | NIL | 341.74 |
| 563 chrSm | ?_SMC02247          | CDS  | 610089 | 610526 +  | 30 | 30 | ON  | 356.93 | ON  | 369.06 | NIL | 373.54 | ON  | 373.54 | ON  | 383.72 |
| 564 chrSm | ?_SMC02248          | CDS  | 610668 | 611318 +  | 30 | 30 | NIL | 311.58 | NIL | 309.09 | ON  | 438.44 | ON  | 374.57 | ON  | 328.64 |
| 566 chrSm | mscL: SMC02250      | CDS  | 611472 | 614978 +  | 30 | 30 | ON  | 346.48 | ON  | 358.01 | NIL | 335.37 | ON  | 373.08 | NIL | 327.93 |
| 567 chrSm | ?_SMC02251          | CDS  | 615700 | 615626 +  | 30 | 30 | ON  | 387.32 | ON  | 592.27 | ON  | 390.47 | ON  | 434.54 | ON  | 377.3  |
| 568 chrSm | galE: SMC02252      | CDS  | 616926 | 616926 +  | 30 | 30 | ON  | 524.7  | ON  | 358.09 | ON  | 386.73 | ON  | 438.17 | ON  | 430.75 |
| 569 chrSm | pctB: SMC02253      | CDS  | 618154 | 618459 -  | 30 | 30 | ON  | 384.9  | ON  | 380.96 | ON  | 390.59 | ON  | 409.73 | NIL | 318.57 |
| 570 chrSm | qxB: SMC02254       | CDS  | 619688 | 619698 -  | 31 | 31 | ON  | 394.48 | ON  | 380.96 | ON  | 401.79 | ON  | 389.42 | ON  | 397.14 |
| 571 chrSm | qXA: SMC02255       | CDS  | 619854 | 621169 -  | 30 | 30 | ON  | 374.26 | ON  | 330.69 | NIL | 361.33 | ON  | 385.07 | NIL | 322.77 |
| 572 chrSm | hpoX: SMC02256      | CDS  | 619868 | 622477 -  | 30 | 30 | ON  | 349.55 | ON  | 375.9  | NIL | 359.62 | ON  | 340.6  | ON  | 383.28 |
| 573 chrSm | ?_SMC02257          | CDS  | 621308 | 623303 -  | 30 | 30 | ON  | 373.06 | ON  | 441.22 | NIL | 305.15 | ON  | 374.43 | NIL | 338    |
| 574 chrSm | ?_SMC02258          | CDS  | 622479 | 623303 -  | 30 | 30 | ON  | 373.06 | ON  | 441.22 | NIL | 305.15 | ON  | 345.46 | NIL | 289.18 |
| 575 chrSm | ?_SMC02259          | CDS  | 623300 | 624025 -  | 30 | 30 | ON  | 323.77 | ON  | 531.2  | NIL | 321.9  | ON  | 341.03 | NIL | 317.71 |
| 576 chrSm | ?_SMC02260          | CDS  | 624133 | 624915 -  | 30 | 30 | ON  | 483.61 | ON  | 531.2  | ON  | 427.8  | ON  | 479.41 | NIL | 373.63 |
| 577 chrSm | ?_SMC02261          | CDS  | 624952 | 625804 -  | 30 | 30 | ON  | 318.71 | NIL | 295.85 | NIL | 294.27 | NIL | 310.26 | NIL | 313.74 |
| 578 chrSm | ?_SMC02262          | CDS  | 625996 | 626610 +  | 30 | 30 | ON  | 331.4  | ON  | 357.92 | NIL | 278.49 | NIL | 325.26 | NIL | 317.89 |
| 579 chrSm | lhb1: SMC02263      | CDS  | 626634 | 627824 +  | 30 | 30 | ON  | 358.28 | ON  | 380.08 | NIL | 270.77 | ON  | 325.26 | NIL | 351.93 |
| 580 chrSm | ?_SMC02264          | CDS  | 627821 | 629434 +  | 30 | 30 | ON  | 429.61 | ON  | 379.37 | ON  | 417.18 | ON  | 372.77 | NIL | 378.81 |
| 581 chrSm | secD2: SMC02265     | CDS  | 629624 | 630016 +  | 30 | 30 | ON  | 605.74 | ON  | 509.81 | NIL | 298.26 | ON  | 388.97 | NIL | 347.8  |
| 582 chrSm | ?_SMC02266          | CDS  | 630110 | 632644 +  | 30 | 30 | ON  | 530.21 | ON  | 495.42 | NIL | 368.46 | ON  | 402.94 | ON  | 408.51 |
| 583 chrSm | ?_SMC02267          | CDS  | 63193  | 633411 +  | 30 | 30 | ON  | 721.67 | ON  | 498.69 | NIL | 364.91 | ON  | 377.3  | ON  | 381.56 |
| 584 chrSm | kpsF3: SMC02268     | CDS  | 633648 | 634103 +  | 30 | 30 | ON  | 471.74 | ON  | 451.58 | NIL | 332.2  | ON  | 433.01 | ON  | 381.99 |
| 585 chrSm | kpsJ: SMC02269      | CDS  | 634287 | 635300 +  | 31 | 38 | ON  | 349.45 | NIL | 281.39 | NIL | 328.59 | ON  | 339.18 | NIL | 334.82 |
| 586 chrSm | kpiJ: SMC02270      | CDS  | 635270 | 636595 -  | 30 | 30 | ON  | 360.18 | ON  | 384.19 | ON  | 463.32 | ON  | 369.72 | NIL | 332.61 |
| 587 chrSm | kpiJ: SMC02271      | CDS  | 636819 | 638235 -  | 30 | 30 | NIL | 303.93 | NIL | 320.51 | NIL | 290.45 | NIL | 291.11 | NIL | 298.65 |
| 588 chrSm | kpiG: SMC02272      | CDS  | 638317 | 639120 -  | 30 | 30 | NIL | 331.22 | NIL | 308.8  | NIL | 320.5  | NIL | 305.36 | NIL | 306.51 |
| 589 chrSm | kpiG: SMC02273      | CDS  | 639160 | 640575 -  | 30 | 30 | ON  | 384.06 | NIL | 319.01 | NIL | 367.15 | ON  | 352.11 | NIL | 303.62 |
| 590 chrSm | kpiU: SMC02274      | CDS  | 640572 | 648068 -  | 30 | 30 | ON  | 475.19 | ON  | 391.5  | NIL | 386.82 | ON  | 382.38 | NIL | 362.2  |
| 591 chrSm | pncA: SMC02275      | CDS  | 648544 | 649677 +  | 30 | 30 | ON  | 509.08 | ON  | 520.27 | NIL | 368.8  | ON  | 469.05 | NIL | 439.75 |
| 592 chrSm | pncB: SMC02276      | CDS  | 649987 | 650622 +  | 30 | 30 | ON  | 483.26 | ON  | 378.03 | NIL | 370.16 | ON  | 366.35 | NIL | 349.58 |
| 593 chrSm | ?_SMC02277          | CDS  | 650739 | 652043 +  | 30 | 30 | ON  | 389.26 | ON  | 374.03 | ON  | 373.08 | ON  | 340.86 | NIL | 336.86 |
| 594 chrSm | ?_SMC02278          | CDS  | 652391 | 652590 -  | 30 | 30 | NIL | 287.17 | NIL | 323.61 | NIL | 257.89 | ON  | 335.07 | NIL | 316.27 |
| 595 chrSm | ?_SMC02279          | CDS  | 652438 | 653298 +  | 30 | 30 | ON  | 393.45 | ON  | 388.64 | NIL | 299.77 | NIL | 335.06 | NIL | 304.27 |
| 596 chrSm | ?_SMC02280          | CDS  | 653292 | 653620 +  | 30 | 30 | ON  | 631.18 | ON  | 677.64 | ON  | 453.04 | ON  | 431.87 | NIL | 499.1  |
| 597 chrSm | ?_SMC02281          | CDS  | 653351 | 655062 +  | 30 | 29 | NIL | 364.83 | NIL | 305.68 | NIL | 361.67 | ON  | 342.39 | NIL | 351.08 |
| 598 chrSm | ?_SMC02282          | CDS  | 655077 | 655626 +  | 30 | 18 | ON  | 278.2  | ON  | 498.57 | NIL | 470.75 | ON  | 460.62 | ON  | 433.99 |
| 599 chrSm | ?_SMC02283          | CDS  | 655666 | 656945 +  | 30 | 28 | ON  | 582.56 | ON  | 411.38 | NIL | 343.71 | ON  | 436.31 | ON  | 400.14 |
| 600 chrSm | ?_SMC02284          | CDS  | 656967 | 657251 +  | 30 | 30 | ON  | 574.85 | ON  | 422.51 | ON  | 390.61 | ON  | 413.99 | NIL | 413.49 |
| 601 chrSm | gjaE: SMC02285      | CDS  | 657248 | 658595 +  | 30 | 30 | ON  | 404.84 | ON  | 390.11 | NIL | 366.05 | ON  | 368.99 | NIL | 353.76 |
| 602 chrSm | ?_SMC02286          | CDS  | 658860 | 659342 -  | 30 | 30 | ON  | 332.33 | ON  | 377.17 | NIL | 402.03 | ON  | 360.59 | NIL | 320.46 |
| 603 chrSm | rnhA2: SMC02327     | CDS  | 660004 | 660513 -  | 30 | 30 | NIL | 301.88 | NIL | 292.62 | ON  | 424.83 | ON  | 358.84 | NIL | 322.83 |
| 604 chrSm | ?_SMC02328          | CDS  | 660620 | 661264 -  | 30 | 30 | NIL | 296.66 | NIL | 309.82 | ON  | 414.08 | NIL | 334.27 | NIL | 319.92 |
| 605 chrSm | ?_SMC02287          | CDS  | 661487 | 661735 -  | 30 | 30 | NIL | 240.05 | NIL | 254.29 | NIL | 275.13 | ON  | 243.45 | NIL | 252.16 |
| 606 chrSm | Trm11b: 3: SMC02289 | CDS  | 661816 | 662370 -  | 30 | 30 | ON  | 327.72 | NIL | 299.87 | NIL | 377.58 | NIL | 377.58 | NIL | 355.64 |
| 607 chrSm | Trm11b: 3: SMC02289 | CDS  | 663823 | 663889 -  | 88 | 0  | ON  | 522.1  | ON  | 426.79 | ON  | 425.71 | ON  | 459.45 | ON  | 364.46 |
| 608 chrSm | hsaR: SMC02292      | CDS  | 664606 | 664230 -  | 30 | 30 | ON  | 967.09 | ON  | 511.59 | ON  | 476.16 | ON  | 413.15 | NIL | 465.21 |
| 609 chrSm | Trm11a: 3: SMC02291 | CDS  | 664623 | 6667803 - | 30 | 30 | ON  | 368.47 | ON  | 407.81 | ON  | 416.81 | ON  | 413.15 | NIL | 362.2  |
| 610 chrSm | hsdS: SMC02295      | CDS  | 667807 | 669081 -  | 30 | 30 | ON  | 421.35 | ON  | 449.22 | ON  | 374.79 | ON  | 406.82 | ON  | 413.23 |
| 611 chrSm | hsdM: SMC02296      | CDS  | 669078 | 670658 -  | 30 | 30 | ON  | 481.53 | ON  | 407.59 | NIL | 374.54 | ON  | 402.61 | ON  | 409.1  |
| 612 chrSm | ?_SMC02297          | CDS  | 670768 | 672309 -  | 30 | 30 | NIL | 268.45 | NIL | 301.88 | NIL | 287.63 | NIL | 269.94 | NIL | 289.09 |
| 613 chrSm | Trm11a: 3: SMC02298 | CDS  | 672823 | 672823 +  | 48 | 0  | ON  | 558.03 | ON  | 449.52 | ON  | 385.05 | ON  | 545.86 | ON  | 478.71 |
| 614 chrSm | Trm11b: 3: SMC02329 | CDS  | 672820 | 673812 +  | 50 | 2  | ON  | 415.34 | ON  | 357.38 | ON  | 396.91 | ON  | 391.97 | ON  | 478.71 |
| 615 chrSm | Trm30.3: SMC02300   | CDS  | 673474 | 675558 -  | 33 | 0  | NIL | 277.76 | NIL | 308.18 | NIL | 311.39 | NIL | 299.53 | NIL | 304.38 |
| 616 chrSm | Trm30.3: SMC02301   | CDS  | 675548 | 675910 -  | 47 | 0  | ON  | 328.9  | NIL | 300.55 | NIL | 296.33 | ON  | 342.56 | NIL | 324.34 |
| 617 chrSm | Trm30.2: SMC02302   | CDS  | 675640 | 676289 -  | 32 | 0  | ON  | 380.02 | ON  | 367.85 | NIL | 383.98 | ON  | 409.55 | NIL | 356.35 |
| 618 chrSm | Trm30.1: SMC0430    | CDS  | 676470 | 676640 -  | 30 | 0  | NIL | 292.04 | NIL | 269.73 | NIL | 334.01 | NIL | 270.96 | NIL | 314.64 |
| 619 chrSm | ?_SMC02303          | CDS  | 676784 | 676966 +  | 34 | 0  | ON  | 696.44 | ON  | 430.12 | NIL | 264.64 | ON  | 342.41 | NIL | 278.8  |
| 620 chrSm | TRNAHTR-2: SMC02208 | trNA | 677219 | 677293 -  | 30 | 30 | ON  | 419.88 | ON  | 382.31 | ON  | 460.7  | ON  | 466.36 | NIL | 533.28 |
| 621 chrSm | ?_SMC02304          | CDS  | 677555 | 677770 +  | 30 | 30 | ON  | 348.95 | ON  | 343.96 | NIL | 348.32 | ON  | 376.66 | NIL | 364.63 |
| 622 chrSm | muFA: SMC02305      | CDS  | 677941 | 679233 +  | 30 | 30 | ON  | 475.15 | ON  | 394.52 | NIL | 362.37 | ON  | 379.41 | NIL | 334.71 |
| 623 chrSm | ?_SMC02306          | CDS  | 679388 | 679828 +  | 30 | 30 | ON  | 397.99 | ON  | 383.43 | NIL | 293.86 | NIL | 322.6  | NIL | 323.38 |
| 624 chrSm | hslD1: SMC02307     | CDS  | 679893 | 681197 +  | 30 | 30 | ON  | 473.41 | ON  | 396.56 | ON  | 408.39 | NIL | 421.83 | NIL | 419.26 |
| 625 chrSm | ?_SMC02308          | CDS  | 681194 | 681670 +  | 30 | 30 | ON  | 447.54 | ON  | 440.31 | NIL | 326.41 | ON  | 333.15 | NIL | 328.17 |
| 626 chrSm | ?_SMC02309          | CDS  | 681684 | 682163 +  | 30 | 30 | ON  | 338.01 | NIL | 426.46 | NIL | 347.48 | ON  | 314.5  | ON  | 328.08 |
| 627 chrSm | InfA: SMC02310      | CDS  | 682321 | 682839 +  | 30 | 30 | ON  | 731.2  | ON  | 436.24 | NIL | 364.7  | ON  | 412.5  | ON  | 328.04 |
| 628 chrSm | InfA: SMC02311      | CDS  | 682637 | 683257 +  | 30 | 30 | ON  | 417.71 | ON  | 323.94 | NIL | 319.9  | NIL | 310.97 | NIL | 329.25 |
| 629 chrSm | ?_SMC02312          | CDS  | 683474 | 683474 +  | 30 | 30 | ON  | 404.73 | ON  | 370.14 | NIL | 343.85 | ON  | 359.3  | NIL | 304.24 |
| 630 chrSm | TRNAPHH-1: SMC02207 | trNA | 683714 | 683789 +  | 30 | 30 | ON  | 381.91 | NIL | 294.09 | ON  | 426.2  | ON  | 400.05 | NIL | 394.9  |
| 631 chrSm | ?_SMC04431          | CDS  | 684058 | 684321 +  | 30 | 30 | ON  | 346.36 | ON  | 347.75 | NIL | 315.03 | NIL | 311.61 | NIL | 302.73 |

|     |       |                  |     |        |          |    |    |     |         |     |        |     |        |     |         |     |        |
|-----|-------|------------------|-----|--------|----------|----|----|-----|---------|-----|--------|-----|--------|-----|---------|-----|--------|
| 632 | chrSm | 7: SM604432      | CDS | 684318 | 684635 + | 30 | 30 | ON  | 467.28  | ON  | 495.06 | ON  | 431.74 | ON  | 471.43  | ON  | 377.77 |
| 633 | chrSm | 7: SM602313      | CDS | 684838 | 685194 - | 30 | 30 | ON  | 427.7   | ON  | 488.94 | ON  | 416.01 | ON  | 408.15  | ON  | 371.06 |
| 634 | chrSm | 7: SM602314      | CDS | 685807 | 686907 + | 30 | 30 | CDS | 329.22  | NIL | 314.36 | NIL | 368.79 | ON  | 342.22  | NIL | 325.82 |
| 635 | chrSm | 7: SM602315      | CDS | 686894 | 687976 + | 30 | 30 | NIL | 276.3   | NIL | 290.57 | NIL | 335.99 | NIL | 310.89  | NIL | 295.14 |
| 636 | chrSm | 7: SM602316      | CDS | 688179 | 688490 + | 30 | 30 | NIL | 290.9   | NIL | 301.13 | ON  | 389.5  | ON  | 356.58  | NIL | 330.81 |
| 637 | chrSm | 7: SM602317      | CDS | 688700 | 689159 - | 30 | 30 | ON  | 412.84  | ON  | 400.11 | NIL | 362.57 | ON  | 362.41  | NIL | 351.73 |
| 638 | chrSm | 7: SM602318      | CDS | 689306 | 689767 - | 30 | 30 | ON  | 381.27  | ON  | 339.91 | NIL | 370.73 | NIL | 313.4   | NIL | 330.73 |
| 639 | chrSm | 7: SM602319      | CDS | 689847 | 690035 - | 30 | 30 | ON  | 347.91  | ON  | 377.91 | NIL | 287.4  | NIL | 312.33  | NIL | 325.26 |
| 640 | chrSm | 7: SM602320      | CDS | 690106 | 690360 - | 30 | 30 | ON  | 471.11  | ON  | 673.45 | NIL | 339.95 | ON  | 415.71  | NIL | 329.56 |
| 641 | chrSm | 7: SM602321      | CDS | 690552 | 691844 - | 30 | 30 | ON  | 385.21  | ON  | 358.61 | NIL | 309.54 | ON  | 325.26  | NIL | 325.56 |
| 642 | chrSm | 7: SM602322      | CDS | 691858 | 693957 - | 30 | 30 | NIL | 368.68  | ON  | 351.27 | NIL | 355.32 | ON  | 348.04  | NIL | 333.4  |
| 643 | chrSm | 7: SM602323      | CDS | 694158 | 694970 + | 30 | 30 | NIL | 274.09  | NIL | 293.78 | NIL | 292    | NIL | 273.72  | NIL | 288.29 |
| 644 | chrSm | 7: SM602325      | CDS | 695084 | 696073 + | 30 | 30 | ON  | 361.63  | ON  | 416.88 | NIL | 371.46 | ON  | 428.11  | NIL | 312.12 |
| 645 | chrSm | 7: SM602325      | CDS | 695084 | 696073 + | 30 | 30 | ON  | 342.78  | NIL | 363.25 | NIL | 305.05 | NIL | 315.79  | NIL | 307.74 |
| 646 | chrSm | 7: SM603000      | CDS | 696263 | 697774 + | 30 | 30 | NIL | 311.1   | NIL | 293.88 | NIL | 322.87 | NIL | 317.86  | NIL | 304.17 |
| 647 | chrSm | 7: SM603001      | CDS | 698751 | 698751 + | 30 | 30 | NIL | 345.26  | NIL | 348.45 | NIL | 301.91 | NIL | 333.31  | NIL | 328.27 |
| 648 | chrSm | 7: SM603002      | CDS | 699766 | 700080 + | 30 | 30 | ON  | 360.56  | ON  | 339.73 | ON  | 468.83 | ON  | 389.35  | ON  | 409.66 |
| 649 | chrSm | 7: SM603003      | CDS | 700077 | 701465 + | 30 | 30 | ON  | 325.79  | ON  | 345.86 | ON  | 428.66 | ON  | 401.15  | NIL | 475.33 |
| 650 | chrSm | 7: SM603004      | CDS | 702172 | 703773 + | 30 | 30 | ON  | 516.81  | ON  | 329.18 | NIL | 385.34 | ON  | 409.95  | NIL | 325.81 |
| 651 | chrSm | 7: SM603005      | CDS | 703799 | 704092 + | 30 | 30 | ON  | 577.14  | ON  | 293.68 | NIL | 355.94 | ON  | 393.07  | NIL | 312.51 |
| 652 | chrSm | 7: SM603006      | CDS | 704096 | 704461 + | 30 | 30 | ON  | 346.6   | NIL | 257.51 | NIL | 359.42 | NIL | 307.21  | NIL | 274.09 |
| 653 | chrSm | chrEY1: SM603006 | CDS | 704482 | 706758 + | 30 | 30 | ON  | 487.97  | ON  | 388.29 | ON  | 483.1  | NIL | 454.42  | NIL | 331.31 |
| 654 | chrSm | chrEY1: SM603007 | CDS | 706764 | 707231 + | 30 | 30 | ON  | 357.75  | NIL | 285.17 | NIL | 311.21 | NIL | 295.06  | NIL | 296.99 |
| 655 | chrSm | chrEY1: SM603008 | CDS | 707228 | 708136 + | 30 | 30 | ON  | 392.07  | NIL | 301.66 | NIL | 304.65 | NIL | 323.51  | NIL | 323.27 |
| 656 | chrSm | chrEY2: SM603009 | CDS | 708133 | 709182 + | 30 | 30 | ON  | 442.7   | ON  | 396.45 | NIL | 337.24 | ON  | 355.95  | NIL | 352.79 |
| 657 | chrSm | chrEY2: SM603010 | CDS | 709182 | 709571 + | 30 | 30 | ON  | 429.89  | NIL | 310.14 | NIL | 337.24 | ON  | 397.91  | NIL | 340.75 |
| 658 | chrSm | chrEY2: SM603012 | CDS | 709568 | 710119 + | 30 | 30 | ON  | 564.45  | NIL | 325.16 | NIL | 345.32 | ON  | 376.96  | NIL | 326.85 |
| 659 | chrSm | 7: SM603013      | CDS | 710149 | 710523 + | 30 | 30 | ON  | 416.4   | NIL | 362.97 | NIL | 330.3  | ON  | 328.43  | NIL | 326.85 |
| 660 | chrSm | 7: SM603014      | CDS | 711589 | 713262 + | 30 | 30 | ON  | 461.97  | ON  | 387.13 | NIL | 344.55 | NIL | 375.69  | NIL | 415.58 |
| 661 | chrSm | 7: SM603015      | CDS | 714089 | 714826 + | 30 | 30 | ON  | 397.14  | ON  | 459.09 | ON  | 436.84 | ON  | 357.81  | NIL | 337.81 |
| 662 | chrSm | 7: SM603016      | CDS | 714838 | 715578 + | 30 | 30 | ON  | 323.67  | NIL | 310.02 | NIL | 342.81 | ON  | 334.9   | NIL | 335.04 |
| 663 | chrSm | 7: SM603017      | CDS | 715587 | 716033 - | 30 | 30 | ON  | 420.64  | NIL | 296.16 | NIL | 301.96 | NIL | 303.98  | NIL | 311.54 |
| 664 | chrSm | 7: SM603018      | CDS | 716030 | 717112 - | 30 | 30 | ON  | 344.13  | NIL | 296.16 | NIL | 322.79 | NIL | 332.27  | NIL | 323.14 |
| 665 | chrSm | 7: SM603019      | CDS | 717324 | 718361 - | 30 | 30 | ON  | 485.26  | ON  | 344.57 | NIL | 364.29 | ON  | 435.14  | NIL | 328.99 |
| 666 | chrSm | 7: SM603020      | CDS | 718449 | 719081 - | 30 | 30 | ON  | 719.96  | ON  | 340.32 | NIL | 390.62 | ON  | 363.44  | NIL | 380.44 |
| 667 | chrSm | 7: SM603021      | CDS | 719101 | 720048 - | 30 | 30 | ON  | 481.7   | ON  | 325.37 | ON  | 407.65 | NIL | 297.47  | NIL | 304.35 |
| 668 | chrSm | 7: SM603022      | CDS | 720050 | 720928 - | 30 | 30 | ON  | 527.99  | ON  | 340.32 | NIL | 297.47 | NIL | 319.38  | NIL | 291.56 |
| 669 | chrSm | 7: SM603023      | CDS | 721127 | 721906 + | 30 | 30 | ON  | 507.45  | ON  | 343.62 | NIL | 310.69 | ON  | 347.99  | NIL | 308.73 |
| 670 | chrSm | 7: SM603024      | CDS | 721908 | 722633 + | 30 | 30 | ON  | 353.51  | NIL | 293.07 | NIL | 310.07 | NIL | 269.44  | NIL | 308.73 |
| 671 | chrSm | 7: SM603025      | CDS | 722679 | 724082 + | 30 | 30 | ON  | 511.76  | NIL | 410.07 | NIL | 377.79 | ON  | 366.26  | NIL | 362.13 |
| 672 | chrSm | 7: SM603026      | CDS | 724079 | 724630 + | 30 | 30 | NIL | 289.62  | NIL | 265.3  | NIL | 295.47 | NIL | 282.17  | NIL | 285.02 |
| 673 | chrSm | 7: SM603027      | CDS | 724938 | 725318 + | 30 | 30 | ON  | 446.17  | NIL | 298.14 | ON  | 389.18 | NIL | 318.01  | NIL | 309.91 |
| 674 | chrSm | 7: SM603028      | CDS | 725325 | 725744 + | 30 | 30 | ON  | 601.53  | ON  | 446.25 | NIL | 274.47 | NIL | 291.21  | ON  | 311.77 |
| 675 | chrSm | 7: SM603029      | CDS | 725744 | 726079 + | 30 | 30 | ON  | 1465.14 | ON  | 426.26 | NIL | 371.87 | NIL | 423.44  | NIL | 395.9  |
| 676 | chrSm | 7: SM603030      | CDS | 726091 | 726879 + | 30 | 30 | ON  | 839.88  | ON  | 337.3  | NIL | 312.17 | NIL | 311.56  | NIL | 290.64 |
| 677 | chrSm | 7: SM603031      | CDS | 726901 | 727407 + | 30 | 30 | ON  | 525.97  | NIL | 307.33 | NIL | 315.78 | ON  | 302.44  | NIL | 354.71 |
| 678 | chrSm | 7: SM603032      | CDS | 727404 | 728519 + | 30 | 30 | ON  | 511.75  | ON  | 329.78 | NIL | 465.56 | ON  | 322.59  | NIL | 429.95 |
| 679 | chrSm | 7: SM603033      | CDS | 728516 | 729055 + | 30 | 30 | ON  | 618.95  | ON  | 397.61 | ON  | 294.16 | NIL | 313.69  | NIL | 313.69 |
| 680 | chrSm | 7: SM603034      | CDS | 729052 | 729762 + | 30 | 30 | ON  | 708.57  | ON  | 328.73 | ON  | 382.3  | ON  | 424.02  | NIL | 378.86 |
| 681 | chrSm | 7: SM603035      | CDS | 729778 | 730277   | 30 | 30 | ON  | 486.98  | ON  | 395.56 | NIL | 427.93 | ON  | 349.75  | NIL | 346.27 |
| 682 | chrSm | 7: SM603036      | CDS | 730277 | 731014 + | 30 | 30 | ON  | 621.81  | ON  | 763.93 | NIL | 381.45 | ON  | 312.97  | NIL | 607.17 |
| 683 | chrSm | 7: SM603037      | CDS | 731285 | 732469 + | 38 | 15 | ON  | 3424.39 | ON  | 752.46 | NIL | 381.45 | ON  | 2065.41 | ON  | 493.64 |
| 684 | chrSm | 7: SM603038      | CDS | 732812 | 733996 + | 34 | 11 | ON  | 2193.77 | ON  | 399.26 | NIL | 377.54 | ON  | 372.93  | NIL | 339.72 |
| 685 | chrSm | 7: SM603039      | CDS | 734262 | 735467 + | 30 | 30 | ON  | 567.43  | ON  | 371.06 | ON  | 387.77 | ON  | 391.78  | ON  | 389.57 |
| 686 | chrSm | 7: SM603040      | CDS | 735785 | 736750 + | 30 | 30 | ON  | 592.38  | ON  | 26.7   | ON  | 371.06 | ON  | 306.5   | NIL | 285.89 |
| 687 | chrSm | 7: SM603041      | CDS | 737106 | 737753 + | 30 | 30 | ON  | 429.12  | NIL | 266.7  | NIL | 405.23 | ON  | 306.5   | NIL | 336.3  |
| 688 | chrSm | 7: SM603042      | CDS | 737750 | 738934 + | 30 | 30 | ON  | 480.18  | ON  | 340.06 | ON  | 463.19 | ON  | 428.9   | NIL | 335.02 |
| 689 | chrSm | 7: SM603043      | CDS | 738938 | 740242 + | 30 | 30 | ON  | 408.18  | ON  | 328.19 | NIL | 463.19 | ON  | 336.3   | NIL | 335.02 |
| 690 | chrSm | 7: SM603044      | CDS | 740239 | 741666 + | 35 | 35 | ON  | 465.4   | ON  | 338.9  | ON  | 286.56 | NIL | 488.02  | NIL | 293.38 |
| 691 | chrSm | 7: SM603045      | CDS | 741602 | 742168 + | 31 | 31 | ON  | 325.41  | NIL | 290.45 | NIL | 328.5  | NIL | 276.08  | NIL | 337.55 |
| 692 | chrSm | 7: SM603046      | CDS | 742440 | 743111 + | 30 | 30 | ON  | 555.38  | ON  | 363.16 | NIL | 344.67 | NIL | 393.36  | ON  | 351.27 |
| 693 | chrSm | 7: SM603047      | CDS | 743202 | 744922 + | 30 | 30 | ON  | 972.66  | ON  | 480.23 | ON  | 416.55 | NIL | 294.04  | ON  | 399.67 |
| 694 | chrSm | 7: SM603048      | CDS | 745924 | 745924 + | 30 | 30 | ON  | 455.12  | ON  | 336.44 | NIL | 302.4  | NIL | 337.38  | ON  | 352.45 |
| 695 | chrSm | 7: SM603049      | CDS | 745927 | 747349 + | 30 | 30 | ON  | 617.76  | ON  | 348.72 | NIL | 317.65 | NIL | 317.65  | NIL | 352.45 |
| 696 | chrSm | 7: SM603050      | CDS | 747002 | 747795 + | 31 | 31 | ON  | 1152.23 | ON  | 438.16 | ON  | 373.42 | ON  | 276.51  | NIL | 350.53 |
| 697 | chrSm | 7: SM603051      | CDS | 747746 | 748202 + | 30 | 30 | ON  | 736.75  | ON  | 388.42 | NIL | 325.52 | NIL | 260.98  | NIL | 319.16 |
| 698 | chrSm | 7: SM603052      | CDS | 748202 | 748475 + | 30 | 30 | ON  | 636.66  | ON  | 288.26 | NIL | 325.15 | NIL | 260.98  | NIL | 319.16 |
| 699 | chrSm | 7: SM603053      | CDS | 748475 | 748475 + | 30 | 30 | ON  | 399.67  | NIL | 288.26 | NIL | 325.15 | NIL | 260.98  | NIL | 319.16 |
| 700 | chrSm | 7: SM603054      | CDS | 750687 | 751536 + | 30 | 30 | NIL | 396.07  | ON  | 342.2  | NIL | 281.2  | NIL | 295.86  | NIL | 311.85 |
| 701 | chrSm | 7: SM603055      | CDS | 750684 | 751436 + | 30 | 30 | NIL | 311.19  | ON  | 35.92  | NIL | 342.2  | NIL | 274.94  | NIL | 280.76 |
| 702 | chrSm | 7: SM603056      | CDS | 751441 | 751854 + | 30 | 30 | ON  | 446.96  | ON  | 520.6  | ON  | 394.81 | ON  | 445.4   | ON  | 439.7  |
| 703 | chrSm | 7: SM603071      | CDS | 751953 | 752507 + | 30 | 30 | ON  | 458.42  | NIL | 309.96 | NIL | 302.56 | NIL | 275.55  | NIL | 317.34 |

|           |                    |     |          |          |    |    |     |        |     |         |     |         |     |         |     |        |
|-----------|--------------------|-----|----------|----------|----|----|-----|--------|-----|---------|-----|---------|-----|---------|-----|--------|
| 704 chrSm | 72: SMC00072       | CDS | 752633   | 753001 + | 30 | 30 | ON  | 464.7  | NIL | 317.79  | NIL | 334.39  | NIL | 304.54  | NIL | 316.79 |
| 705 chrSm | ? SMC00057         | CDS | 753661 + | 753661 + | 30 | 30 | ON  | 365.71 | NIL | 291.9   | NIL | 296.06  | NIL | 248.4   | NIL | 270.12 |
| 706 chrSm | ? SMC00058         | CDS | 753692   | 754591 + | 30 | 30 | ON  | 357.76 | NIL | 357.57  | NIL | 330.51  | NIL | 331.98  | NIL | 305.75 |
| 707 chrSm | fdID2: SMC00059    | CDS | 754910   | 755809 + | 30 | 30 | ON  | 475.19 | ON  | 358.48  | ON  | 391.99  | ON  | 394.52  | NIL | 366.87 |
| 708 chrSm | agIR: SMC00060     | CDS | 756368   | 757438 + | 30 | 30 | ON  | 420.64 | ON  | 354.29  | ON  | 382.46  | ON  | 400.97  | ON  | 412.84 |
| 709 chrSm | agIR: SMC00061     | CDS | 757932 + | 759132 + | 30 | 30 | ON  | 877.28 | ON  | 424.76  | ON  | 378.24  | ON  | 408.34  | NIL | 390.5  |
| 710 chrSm | agIR: SMC00062     | CDS | 759384   | 760394 + | 30 | 30 | ON  | 416.18 | ON  | 327.6   | NIL | 265.5   | NIL | 308.34  | NIL | 348.39 |
| 711 chrSm | agIR: SMC00063     | CDS | 760396   | 761538 + | 30 | 30 | ON  | 423.27 | ON  | 322.56  | NIL | 286.48  | NIL | 317.63  | NIL | 321.02 |
| 712 chrSm | agIR: SMC00064     | CDS | 761568   | 763223 + | 30 | 30 | ON  | 447.8  | NIL | 307.7   | NIL | 307.7   | NIL | 331.42  | NIL | 339.66 |
| 713 chrSm | agIR: SMC00065     | CDS | 763243   | 764843 + | 30 | 30 | ON  | 461.11 | ON  | 367.69  | NIL | 337.72  | ON  | 371.13  | NIL | 338.62 |
| 714 chrSm | ? SMC00066         | CDS | 764490   | 764843 + | 30 | 30 | ON  | 474.78 | ON  | 479.74  | NIL | 340.62  | ON  | 371.13  | NIL | 332.49 |
| 715 chrSm | Trm22-3: SMC00067  | CDS | 765114   | 766277 - | 50 | 0  | ON  | 455.33 | ON  | 493.73  | ON  | 358.67  | ON  | 406.68  | ON  | 455.03 |
| 716 chrSm | edd: SMC00068      | CDS | 766534   | 768454 - | 30 | 30 | ON  | 465.35 | ON  | 433.11  | ON  | 424.88  | ON  | 386.3   | ON  | 369.44 |
| 717 chrSm | polI: SMC00069     | CDS | 768546   | 769244 - | 30 | 30 | ON  | 455.55 | ON  | 446.01  | ON  | 360.32  | ON  | 330.56  | ON  | 327.2  |
| 718 chrSm | polI: SMC00070     | CDS | 768546   | 770728 - | 30 | 30 | ON  | 618.81 | ON  | 585.84  | ON  | 340.47  | ON  | 333.75  | ON  | 337.7  |
| 719 chrSm | ordL2: SMC00071    | CDS | 770925   | 772221 - | 30 | 30 | ON  | 805.58 | ON  | 565.84  | ON  | 340.47  | ON  | 333.75  | ON  | 337.7  |
| 720 chrSm | ? SMC00072         | CDS | 772228   | 773864 - | 30 | 30 | ON  | 383.02 | ON  | 548.72  | NIL | 331.1   | NIL | 311.57  | NIL | 338.86 |
| 721 chrSm | ? SMC00073         | CDS | 773789   | 774973 + | 30 | 30 | ON  | 498.08 | ON  | 568.02  | ON  | 524.38  | ON  | 538.64  | ON  | 464.33 |
| 722 chrSm | ? SMC00074         | CDS | 775244   | 775384 + | 30 | 30 | ON  | 437.51 | ON  | 361.06  | ON  | 408.36  | ON  | 424.59  | ON  | 454.27 |
| 723 chrSm | mcG2: SMC00075     | CDS | 775714   | 778239 + | 30 | 30 | ON  | 431.68 | ON  | 292.06  | NIL | 491.99  | ON  | 562.73  | ON  | 491.43 |
| 724 chrSm | ? SMC00076         | CDS | 778239 + | 779463 + | 30 | 30 | ON  | 379.37 | NIL | 292.06  | NIL | 351.46  | ON  | 348.32  | NIL | 347.14 |
| 725 chrSm | ? SMC00076         | CDS | 779858   | 779868 - | 30 | 30 | NIL | 325.55 | NIL | 312.83  | NIL | 334.19  | ON  | 342.98  | ON  | 346.04 |
| 726 chrSm | aceA: SMC000768    | CDS | 779980   | 781269 - | 30 | 30 | NIL | 278.68 | NIL | 300.42  | NIL | 369.16  | ON  | 342.2   | ON  | 385.73 |
| 727 chrSm | ? SMC000769        | CDS | 781497   | 782909 + | 30 | 30 | ON  | 367.76 | ON  | 353.61  | ON  | 437.35  | ON  | 372.24  | NIL | 372.24 |
| 728 chrSm | polI: SMC000770    | CDS | 783254   | 784348 + | 30 | 30 | ON  | 336.76 | ON  | 329.68  | NIL | 305.46  | NIL | 317.23  | NIL | 281.17 |
| 729 chrSm | polI: SMC000771    | CDS | 784466   | 785611 + | 30 | 30 | ON  | 632.88 | ON  | 1038.5  | ON  | 609.12  | NIL | 971     | ON  | 487.03 |
| 730 chrSm | polI: SMC000772    | CDS | 784466   | 785611 + | 30 | 30 | ON  | 325.61 | NIL | 312.97  | NIL | 310.68  | NIL | 315.66  | ON  | 332.92 |
| 731 chrSm | polI: SMC000773    | CDS | 785616   | 787352 + | 30 | 30 | NIL | 299.89 | ON  | 337.32  | NIL | 283.38  | NIL | 312.77  | NIL | 296.69 |
| 732 chrSm | ? SMC00088         | CDS | 787646   | 789460 - | 30 | 30 | ON  | 319.62 | NIL | 372.69  | NIL | 292.31  | NIL | 271.49  | NIL | 287.51 |
| 733 chrSm | acgA2: SMC000774   | CDS | 789645   | 791597 + | 30 | 30 | ON  | 338.3  | ON  | 346.01  | NIL | 323.07  | ON  | 335.31  | NIL | 341.66 |
| 734 chrSm | fbpB: SMC000775    | CDS | 791887   | 793669 + | 30 | 30 | ON  | 493.88 | ON  | 454.86  | ON  | 425.98  | ON  | 521.42  | NIL | 484.08 |
| 735 chrSm | ? SMC000776        | CDS | 793692   | 797096 - | 30 | 30 | ON  | 369.37 | ON  | 401.38  | NIL | 352.22  | ON  | 340.23  | NIL | 303.43 |
| 736 chrSm | ? SMC000777        | CDS | 797329   | 797775 - | 30 | 30 | ON  | 418.04 | ON  | 468.34  | ON  | 379.16  | ON  | 420.04  | NIL | 373.54 |
| 737 chrSm | IRNAHS-1: SMC00841 | CDS | 797938   | 798014 + | 30 | 30 | ON  | 565.32 | ON  | 673.46  | ON  | 1056.81 | ON  | 735.48  | ON  | 822.57 |
| 738 chrSm | ? SMC000778        | CDS | 798971 + | 798971 + | 30 | 30 | ON  | 906.16 | NIL | 630.41  | NIL | 514.23  | ON  | 476.82  | ON  | 464.16 |
| 739 chrSm | ? SMC000779        | CDS | 799009   | 800247 + | 30 | 30 | ON  | 321.44 | NIL | 310.41  | NIL | 362.94  | ON  | 476.82  | ON  | 464.16 |
| 740 chrSm | ? SMC000780        | CDS | 800319   | 800247 - | 30 | 30 | ON  | 315.41 | ON  | 425.16  | NIL | 358.45  | ON  | 476.82  | ON  | 464.16 |
| 741 chrSm | icdA: SMC000781    | CDS | 801316   | 802812 + | 30 | 30 | ON  | 414.16 | ON  | 503.14  | NIL | 373.34  | ON  | 411.57  | NIL | 374.91 |
| 742 chrSm | ? SMC000782        | CDS | 8033072  | 804184 + | 30 | 30 | ON  | 913.52 | ON  | 503.14  | NIL | 351.83  | NIL | 319.91  | NIL | 355.64 |
| 743 chrSm | ? SMC000783        | CDS | 804174   | 805526 + | 30 | 30 | ON  | 343.15 | ON  | 394.52  | NIL | 305.67  | ON  | 446.53  | NIL | 346.91 |
| 744 chrSm | ? SMC000784        | CDS | 805302   | 806345 - | 30 | 30 | ON  | 387.38 | ON  | 421.67  | ON  | 418.94  | NIL | 299.39  | NIL | 351.44 |
| 745 chrSm | ? SMC000785        | CDS | 806545   | 807009 + | 30 | 30 | NIL | 523.26 | ON  | 1883.35 | ON  | 893.25  | ON  | 834.68  | NIL | 620.33 |
| 746 chrSm | ddpA1: SMC000786   | CDS | 807487   | 809082 + | 30 | 30 | ON  | 278.3  | ON  | 431.77  | NIL | 327.74  | ON  | 437.54  | NIL | 336.45 |
| 747 chrSm | ddpB1: SMC000787   | CDS | 809186   | 810190 + | 30 | 30 | ON  | 857.34 | ON  | 2038.37 | ON  | 692.6   | ON  | 1422.53 | ON  | 704.69 |
| 748 chrSm | ddpD1: SMC000788   | CDS | 811021   | 811109 + | 30 | 30 | ON  | 974.4  | ON  | 487.77  | NIL | 328.46  | ON  | 512.59  | ON  | 385.52 |
| 749 chrSm | ddpF1: SMC000789   | CDS | 811111   | 811965 + | 30 | 30 | ON  | 885.63 | ON  | 608.71  | ON  | 404.19  | ON  | 473.22  | ON  | 405.76 |
| 750 chrSm | ? SMC000790        | CDS | 811962   | 812789 + | 30 | 30 | ON  | 774.06 | ON  | 461.65  | ON  | 384.82  | ON  | 485.09  | ON  | 450.76 |
| 751 chrSm | ddpF1: SMC000790   | CDS | 812854   | 813198 + | 30 | 30 | ON  | 710.7  | ON  | 504.21  | NIL | 412.36  | ON  | 412.68  | NIL | 374.4  |
| 752 chrSm | ? SMC000791        | CDS | 813521 + | 813521 + | 30 | 30 | ON  | 364.44 | ON  | 439.74  | ON  | 373.84  | ON  | 412.68  | NIL | 363.84 |
| 753 chrSm | ? SMC000792        | CDS | 813623   | 814753 + | 30 | 30 | NIL | 302.16 | NIL | 315.61  | NIL | 346.15  | ON  | 328.06  | NIL | 321.11 |
| 754 chrSm | ? SMC000793        | CDS | 813623   | 815577 - | 30 | 30 | NIL | 385.23 | ON  | 478.68  | NIL | 344.6   | ON  | 382.45  | NIL | 278.9  |
| 755 chrSm | ? SMC000795        | CDS | 814780   | 816350 - | 30 | 30 | ON  | 349.73 | ON  | 345.35  | ON  | 391.58  | ON  | 400.91  | ON  | 380.03 |
| 756 chrSm | ? SMC000796        | CDS | 816102   | 816350 - | 30 | 30 | ON  | 228.17 | NIL | 261.2   | NIL | 206.87  | NIL | 219.12  | NIL | 275.5  |
| 757 chrSm | ? SMC000797        | CDS | 817466   | 817725 + | 30 | 30 | NIL | 436.32 | NIL | 441.07  | ON  | 409.74  | ON  | 389.91  | ON  | 382.28 |
| 758 chrSm | ? SMC000798        | CDS | 818874   | 819122 + | 30 | 30 | NIL | 295.12 | NIL | 287.53  | NIL | 271.94  | NIL | 289.45  | NIL | 317.03 |
| 759 chrSm | ? SMC000799        | CDS | 819147   | 819719 + | 30 | 30 | NIL | 255.3  | NIL | 270.12  | NIL | 269.68  | NIL | 265.34  | NIL | 292.12 |
| 760 chrSm | ? SMC00800         | CDS | 819830   | 820273 - | 30 | 30 | NIL | 322.59 | NIL | 355.16  | NIL | 328.94  | ON  | 340.73  | NIL | 342.66 |
| 761 chrSm | ? SMC00801         | CDS | 820589   | 821245 + | 30 | 30 | ON  | 319.59 | ON  | 337.57  | NIL | 385.04  | NIL | 390.97  | NIL | 339.09 |
| 762 chrSm | ? SMC00802         | CDS | 821447   | 821812 + | 30 | 30 | ON  | 358    | NIL | 329.62  | ON  | 288.17  | NIL | 390.97  | NIL | 326.1  |
| 763 chrSm | ? SMC00803         | CDS | 822073   | 822888 - | 30 | 30 | ON  | 333.05 | NIL | 294.67  | ON  | 466.07  | ON  | 377.27  | NIL | 365.71 |
| 764 chrSm | ? SMC00804         | CDS | 823007   | 824230 + | 30 | 30 | ON  | 357.85 | NIL | 334.66  | NIL | 341.85  | ON  | 349.02  | NIL | 333.24 |
| 765 chrSm | ? SMC00805         | CDS | 824264   | 824908 + | 30 | 30 | ON  | 363.81 | ON  | 396.55  | ON  | 421.23  | ON  | 378.48  | NIL | 471.87 |
| 766 chrSm | ? SMC00806         | CDS | 825182   | 825550 + | 30 | 30 | NIL | 268.85 | NIL | 272.84  | NIL | 299.08  | NIL | 298.02  | NIL | 275.84 |
| 767 chrSm | ? SMC00807         | CDS | 825182   | 827020 - | 30 | 30 | NIL | 288.2  | NIL | 293.96  | NIL | 264.04  | NIL | 311.97  | NIL | 322.43 |
| 768 chrSm | chrA: SMC00808     | CDS | 827099   | 828541 + | 30 | 30 | NIL | 327.63 | NIL | 311.29  | NIL | 324.86  | NIL | 291.7   | NIL | 291.7  |
| 769 chrSm | ? SMC00809         | CDS | 828912   | 829178 - | 30 | 30 | NIL | 362.73 | NIL | 493.67  | NIL | 316.49  | ON  | 363.69  | NIL | 351.08 |
| 770 chrSm | IRNAHS-1: SMC00842 | RNA | 830173   | 830246 - | 31 | 27 | NIL | 306.57 | ON  | 346.18  | NIL | 289.38  | ON  | 440.06  | NIL | 289.71 |
| 771 chrSm | ? SMC00810         | CDS | 830636   | 832176 + | 30 | 30 | ON  | 527.42 | ON  | 409.48  | ON  | 445.64  | ON  | 478.3   | NIL | 363.77 |
| 772 chrSm | ftsJ: SMC00811     | CDS | 832173   | 832910 + | 30 | 30 | ON  | 397.54 | ON  | 332.89  | NIL | 290.5   | ON  | 348.87  | NIL | 316.92 |
| 773 chrSm | ? SMC00812         | CDS | 832915   | 833298 + | 30 | 30 | ON  | 328.17 | ON  | 336.89  | NIL | 344.99  | NIL | 335.09  | NIL | 318.25 |
| 774 chrSm | ? SMC00813         | CDS | 833376   | 834788 - | 30 | 30 | ON  | 353.85 | NIL | 322.53  | NIL | 292.92  | NIL | 316.46  | NIL | 299.65 |
| 775 chrSm | ? SMC00814         | CDS | 835041   | 836021 + | 30 | 30 | ON  | 340.03 | ON  | 322.53  | ON  | 378.02  | ON  | 344.47  | NIL | 359.24 |

|           |                   |     |          |           |    |    |     |         |     |         |     |        |     |         |     |         |
|-----------|-------------------|-----|----------|-----------|----|----|-----|---------|-----|---------|-----|--------|-----|---------|-----|---------|
| 776 chrSm | gnab.SMC00815     | CDS | 836272   | 837714 +  | 30 | 30 | ON  | 852.44  | ON  | 439.39  | ON  | 445.03 | ON  | 456.78  | ON  | 458.06  |
| 777 chrSm | ?_SMC00816        | CDS | 837775   | 838191 +  | 30 | 30 | ON  | 577.24  | ON  | 402.09  | NIL | 317.62 | NIL | 326.15  | NIL | 320.83  |
| 778 chrSm | ?_SMC00817        | CDS | 838306   | 839181 +  | 30 | 30 | ON  | 370.67  | ON  | 356.42  | ON  | 406.5  | ON  | 491.72  | ON  | 438.57  |
| 779 chrSm | oxyR.SMC00818     | CDS | 839182   | 840117 -  | 30 | 30 | NIL | 297.72  | NIL | 302.56  | NIL | 335.6  | NIL | 317.59  | NIL | 317.39  |
| 780 chrSm | KatA.SMC00819     | CDS | 840311   | 841795 +  | 30 | 30 | ON  | 328.66  | ON  | 385.57  | NIL | 373.3  | ON  | 459.39  | NIL | 265.73  |
| 781 chrSm | ?_SMC00820        | CDS | 841879   | 842829 +  | 30 | 30 | ON  | 388.88  | ON  | 431.26  | NIL | 383.9  | ON  | 408.29  | NIL | 344.6   |
| 782 chrSm | ?_SMC00821        | CDS | 843040   | 843336 +  | 30 | 30 | ON  | 400.19  | ON  | 1178.14 | ON  | 789.57 | ON  | 871.79  | ON  | 896.03  |
| 783 chrSm | ?_SMC00822        | CDS | 843911   | 843911 +  | 30 | 30 | ON  | 396.39  | ON  | 389.7   | NIL | 317.44 | ON  | 442.64  | NIL | 356.07  |
| 784 chrSm | ?_SMC00823        | CDS | 843915   | 843915 +  | 30 | 30 | ON  | 333.95  | ON  | 389.7   | NIL | 317.44 | ON  | 442.64  | NIL | 356.07  |
| 785 chrSm | ?_SMC00824        | CDS | 844367   | 845200 -  | 30 | 30 | ON  | 361.69  | ON  | 460.76  | NIL | 364.57 | ON  | 394.07  | NIL | 364.73  |
| 786 chrSm | gnt1.SMC00825     | CDS | 845337   | 846782 -  | 30 | 30 | ON  | 433.87  | ON  | 368.06  | NIL | 358.21 | ON  | 380.89  | NIL | 380.69  |
| 787 chrSm | ?_SMC00826        | CDS | 846848   | 847585 -  | 30 | 30 | ON  | 347.98  | ON  | 350.44  | ON  | 380.72 | ON  | 363.96  | NIL | 345.45  |
| 788 chrSm | ?_SMC00827        | CDS | 847602   | 849107 -  | 30 | 30 | ON  | 422.16  | ON  | 344.2   | NIL | 319.73 | ON  | 338.98  | NIL | 310.83  |
| 789 chrSm | ?_SMC00828        | CDS | 849289   | 849795 -  | 30 | 30 | ON  | 383.16  | ON  | 41.3    | NIL | 345.1  | ON  | 320.44  | NIL | 371.86  |
| 790 chrSm | ?_SMC00829        | CDS | 850072   | 850899 -  | 30 | 30 | ON  | 336.88  | ON  | 335.55  | NIL | 308.57 | NIL | 324.73  | NIL | 347.37  |
| 791 chrSm | ?_SMC00830        | CDS | 851078   | 852346 +  | 30 | 30 | ON  | 374.06  | ON  | 325.07  | NIL | 339.08 | NIL | 331.97  | NIL | 333.59  |
| 792 chrSm | ?_SMC00831        | CDS | 852348   | 853244 -  | 30 | 30 | ON  | 331.41  | ON  | 342.59  | NIL | 304.92 | ON  | 357.31  | NIL | 324.15  |
| 793 chrSm | glicD.SMC00832    | CDS | 853444   | 854883 +  | 30 | 30 | ON  | 340.89  | ON  | 373.99  | NIL | 289.51 | ON  | 340.78  | NIL | 337.2   |
| 794 chrSm | glicE.SMC00833    | CDS | 854880   | 856097 +  | 30 | 30 | ON  | 408.95  | ON  | 366.18  | NIL | 375.47 | ON  | 386.59  | ON  | 347.83  |
| 795 chrSm | glicF.SMC00926    | CDS | 856231   | 857523 +  | 30 | 30 | NIL | 307.91  | ON  | 387.44  | NIL | 364.25 | ON  | 342.38  | NIL | 357.51  |
| 796 chrSm | ?_SMC00925        | CDS | 856762   | 858457 -  | 30 | 30 | ON  | 479.25  | ON  | 774.26  | ON  | 563.45 | ON  | 747.11  | ON  | 481.65  |
| 797 chrSm | ?_SMC00924        | CDS | 859388   | 859388 -  | 30 | 30 | ON  | 558.01  | ON  | 599.11  | ON  | 409.83 | ON  | 785.18  | ON  | 481.65  |
| 798 chrSm | bag.SMC00923      | CDS | 859674   | 860309 +  | 30 | 30 | ON  | 420.84  | ON  | 349.27  | NIL | 359.04 | ON  | 371.9   | ON  | 352.38  |
| 799 chrSm | ?_SMC00922        | CDS | 860384   | 861841 -  | 30 | 30 | ON  | 410.07  | ON  | 499.97  | ON  | 394.51 | ON  | 496.14  | ON  | 469.28  |
| 800 chrSm | ?_SMC00921        | CDS | 862031   | 862417 -  | 30 | 30 | NIL | 269.12  | NIL | 318.12  | NIL | 320.88 | NIL | 312.62  | NIL | 312.62  |
| 801 chrSm | ?_SMC00920        | CDS | 862916   | 862916 -  | 30 | 30 | NIL | 294.69  | NIL | 304.73  | NIL | 355.33 | ON  | 308.79  | NIL | 308.9   |
| 802 chrSm | hiss.SMC00919     | CDS | 863149   | 864663 +  | 30 | 30 | ON  | 430.37  | ON  | 332.03  | NIL | 356.85 | ON  | 357.72  | NIL | 359.81  |
| 803 chrSm | ?_SMC00918        | CDS | 864469   | 8645808 + | 30 | 30 | ON  | 459.24  | ON  | 408.13  | ON  | 392.52 | ON  | 384.76  | NIL | 362.14  |
| 804 chrSm | higG.SMC00917     | CDS | 865805   | 866500 +  | 30 | 30 | ON  | 537.08  | ON  | 399.88  | NIL | 364.86 | ON  | 403.76  | NIL | 373.44  |
| 805 chrSm | gnt11.SMC00916    | CDS | 866620   | 867363 +  | 54 | 54 | ON  | 514.78  | ON  | 401.99  | ON  | 390.09 | ON  | 424.61  | ON  | 396.82  |
| 806 chrSm | ?_SMC00915        | CDS | 867138   | 867329 +  | 33 | 33 | ON  | 583.03  | ON  | 451.33  | ON  | 400.59 | ON  | 431.6   | ON  | 436.67  |
| 807 chrSm | ?_SMC00914        | CDS | 867417   | 868634 +  | 30 | 30 | ON  | 379.56  | ON  | 328.17  | NIL | 316.66 | NIL | 327.84  | NIL | 317.68  |
| 808 chrSm | groEL1.SMC00913   | CDS | 868135   | 870772 -  | 31 | 1  | ON  | 6101.31 | ON  | 2006.34 | ON  | 585.51 | ON  | 1012.42 | ON  | 603.39  |
| 809 chrSm | groES1.SMC00912   | CDS | 870848   | 871144 -  | 30 | 6  | ON  | 1054.99 | ON  | 3187.32 | ON  | 819.59 | ON  | 2313.37 | ON  | 1143.98 |
| 810 chrSm | ?_SMC00911        | CDS | 871413   | 872240 +  | 30 | 30 | ON  | 411.29  | ON  | 439.95  | ON  | 374.31 | ON  | 414.69  | ON  | 395.78  |
| 811 chrSm | ?_SMC00910        | CDS | 872554   | 873402 +  | 30 | 30 | ON  | 474.89  | ON  | 420.56  | NIL | 308.44 | ON  | 351.97  | ON  | 399.45  |
| 812 chrSm | rnfE.SMC00909     | CDS | 873499 + | 874399 +  | 30 | 30 | ON  | 346.36  | NIL | 303.18  | NIL | 308.44 | NIL | 314.12  | ON  | 311.93  |
| 813 chrSm | lles.SMC00908     | CDS | 873416   | 873499 +  | 30 | 30 | ON  | 368.4   | ON  | 366.82  | NIL | 310.85 | NIL | 306.91  | NIL | 329.09  |
| 814 chrSm | ?_SMC00907        | CDS | 874682   | 877391 +  | 30 | 30 | ON  | 617.49  | ON  | 557.82  | ON  | 508.21 | ON  | 543.29  | ON  | 422.46  |
| 815 chrSm | ?_SMC00906        | CDS | 877331   | 878345 +  | 30 | 30 | ON  | 348.65  | NIL | 364.88  | NIL | 293.96 | NIL | 267.87  | NIL | 288.89  |
| 816 chrSm | ?_SMC00905        | CDS | 878887   | 879380 -  | 30 | 30 | ON  | 348.6   | NIL | 367.82  | NIL | 322.73 | NIL | 329.5   | NIL | 324.47  |
| 817 chrSm | ?_SMC00904        | CDS | 879455   | 881176 +  | 30 | 30 | ON  | 428.06  | ON  | 434.19  | ON  | 421.47 | ON  | 470.94  | ON  | 398.72  |
| 818 chrSm | ?_SMC00903        | CDS | 881183   | 881743 +  | 30 | 30 | NIL | 295.71  | NIL | 298.65  | NIL | 274.01 | NIL | 290.4   | NIL | 343.06  |
| 819 chrSm | ?_SMC00902        | CDS | 881816   | 882715 +  | 30 | 30 | ON  | 393.37  | ON  | 410.7   | ON  | 450.58 | ON  | 361.84  | ON  | 413.27  |
| 820 chrSm | ?_SMC00900        | CDS | 882944   | 883330 -  | 30 | 30 | NIL | 289.11  | NIL | 322.28  | NIL | 294.82 | NIL | 303.67  | NIL | 294.91  |
| 821 chrSm | ?_SMC00899        | CDS | 883330   | 883584 -  | 30 | 30 | ON  | 371.2   | ON  | 381.06  | ON  | 399.52 | ON  | 433.7   | ON  | 393.15  |
| 822 chrSm | kefB1.SMC00898    | CDS | 883723   | 885555 -  | 30 | 30 | ON  | 310.56  | ON  | 422.93  | ON  | 386.41 | ON  | 392.98  | NIL | 342.76  |
| 823 chrSm | pmrA.SMC00897     | CDS | 885707   | 887053 +  | 30 | 30 | ON  | 413.9   | ON  | 382.01  | ON  | 396.83 | ON  | 402.55  | NIL | 372.35  |
| 824 chrSm | ?_SMC00896        | CDS | 887162   | 887980 +  | 30 | 30 | ON  | 447.9   | ON  | 374.13  | NIL | 352.75 | NIL | 320.82  | NIL | 315.7   |
| 825 chrSm | ?_SMC00895        | CDS | 888041   | 888277 +  | 30 | 30 | ON  | 458.3   | NIL | 309.37  | NIL | 324.72 | NIL | 330.09  | NIL | 305.9   |
| 826 chrSm | kdhA.SMC00894     | CDS | 888315   | 889628 +  | 30 | 30 | ON  | 473.7   | ON  | 339.19  | NIL | 367.44 | ON  | 348.17  | NIL | 313.51  |
| 827 chrSm | ?_SMC00893        | CDS | 889665   | 890375 +  | 30 | 30 | ON  | 372.41  | ON  | 335.7   | NIL | 354.26 | ON  | 332.35  | NIL | 316.53  |
| 828 chrSm | lpxX.SMC00892     | CDS | 891578   | 891589 +  | 30 | 30 | ON  | 411.13  | ON  | 349.6   | NIL | 361.55 | ON  | 393.2   | NIL | 359.43  |
| 829 chrSm | TrnH1b-4.SMC00934 | CDS | 892176 - | 892176 -  | 88 | 0  | ON  | 522.1   | ON  | 426.79  | ON  | 425.71 | ON  | 459.45  | ON  | 364.46  |
| 830 chrSm | TrnH1b-4.SMC00891 | CDS | 892310   | 892317 -  | 42 | 1  | ON  | 913.99  | ON  | 520.14  | ON  | 483.17 | ON  | 636.77  | ON  | 497.75  |
| 831 chrSm | ?_SMC00933        | CDS | 892736   | 892969 -  | 30 | 30 | NIL | 299.15  | NIL | 290.62  | NIL | 457.7  | ON  | 284.88  | NIL | 280.38  |
| 832 chrSm | mul.SMC00932      | CDS | 893063   | 894880 -  | 30 | 30 | ON  | 488.3   | NIL | 371.78  | NIL | 360.89 | NIL | 395.21  | NIL | 342.89  |
| 833 chrSm | ?_SMC00888        | CDS | 895248   | 896984 +  | 30 | 30 | ON  | 354.86  | NIL | 304.85  | NIL | 329.55 | ON  | 357.33  | NIL | 351.36  |
| 834 chrSm | ?_SMC00887        | CDS | 896881   | 898327 +  | 30 | 30 | ON  | 350.18  | ON  | 370.81  | NIL | 373.54 | ON  | 391.97  | NIL | 371.81  |
| 835 chrSm | ?_SMC00929        | CDS | 898303   | 899283 -  | 30 | 30 | ON  | 332.85  | ON  | 342.68  | NIL | 357.22 | NIL | 327.87  | NIL | 340.01  |
| 836 chrSm | ?_SMC00886        | CDS | 899365   | 900909 +  | 30 | 30 | ON  | 393.27  | ON  | 377.38  | NIL | 346.13 | ON  | 387.04  | NIL | 345.6   |
| 837 chrSm | ?_SMC00885        | CDS | 900992   | 901630 -  | 30 | 30 | ON  | 429.98  | ON  | 513.83  | ON  | 464.72 | ON  | 477.76  | NIL | 438.56  |
| 838 chrSm | lrvD1.SMC00884    | CDS | 903719 - | 903719 -  | 30 | 30 | ON  | 440.64  | ON  | 394     | NIL | 355.29 | ON  | 385.74  | NIL | 360.63  |
| 839 chrSm | ?_SMC00883        | CDS | 903810   | 904694 -  | 31 | 31 | ON  | 494.02  | ON  | 428.21  | ON  | 430.67 | ON  | 438.47  | NIL | 376.55  |
| 840 chrSm | ?_SMC00882        | CDS | 905329 - | 905329 -  | 30 | 30 | ON  | 489.3   | ON  | 443.36  | ON  | 443.36 | ON  | 424.07  | NIL | 376.55  |
| 841 chrSm | depK1.SMC00881    | CDS | 905344   | 906264 -  | 31 | 31 | ON  | 534.96  | ON  | 461.88  | NIL | 422.84 | ON  | 423.07  | NIL | 350.97  |
| 842 chrSm | ?_SMC00880        | CDS | 906261   | 907031 -  | 30 | 30 | ON  | 318.19  | ON  | 362.13  | NIL | 343.93 | NIL | 313.03  | NIL | 327.34  |
| 843 chrSm | ?_SMC00879        | CDS | 907157   | 908011 +  | 30 | 30 | ON  | 345.36  | NIL | 310     | NIL | 333.69 | NIL | 326.01  | NIL | 360.57  |
| 844 chrSm | ?_SMC00878        | CDS | 908239   | 908979 +  | 30 | 30 | NIL | 309.31  | ON  | 385.04  | NIL | 371.55 | ON  | 384.23  | NIL | 327.88  |
| 845 chrSm | ?_SMC00877        | CDS | 909133   | 909966 +  | 30 | 30 | ON  | 356.36  | ON  | 380.22  | NIL | 362.6  | ON  | 326.76  | NIL | 334.68  |
| 846 chrSm | ?_SMC00876        | CDS | 910428   | 911582 +  | 30 | 30 | ON  | 406.88  | ON  | 405.85  | ON  | 404.59 | ON  | 417.25  | ON  | 397.01  |
| 847 chrSm | corA2.SMC00874    | CDS | 911877   | 912857 +  | 30 | 30 | ON  | 343.87  | ON  | 333.67  | NIL | 325.75 | NIL | 312.53  | NIL | 312.53  |

|           |                 |     |        |        |   |    |    |     |         |     |        |     |        |     |        |     |        |
|-----------|-----------------|-----|--------|--------|---|----|----|-----|---------|-----|--------|-----|--------|-----|--------|-----|--------|
| 848 chrSm | kup1: SMC00873  | CDS | 912907 | 914775 | + | 30 | 30 | ON  | 371.48  | ON  | 335.15 | NIL | 341.7  | ON  | 347.33 | ON  | 388.73 |
| 849 chrSm | ? SMC00928      | CDS | 915066 | 916223 | + | 30 | 30 | ON  | 452.67  | ON  | 458.22 | NIL | 362.17 | ON  | 463.1  | NIL | 388.73 |
| 850 chrSm | alpi: SMC00872  | CDS | 916515 | 916877 | + | 30 | 30 | ON  | 1483.43 | ON  | 558.87 | ON  | 682    | ON  | 687.21 | ON  | 544.69 |
| 851 chrSm | alpb: SMC00871  | CDS | 916938 | 917690 | + | 30 | 30 | ON  | 909.44  | ON  | 534.61 | ON  | 365.7  | ON  | 367.51 | ON  | 337.24 |
| 852 chrSm | alpe: SMC00870  | CDS | 917775 | 918002 | + | 30 | 30 | ON  | 1185.09 | ON  | 520.92 | NIL | 554.31 | ON  | 737.63 | ON  | 444.89 |
| 853 chrSm | alpf: SMC00869  | CDS | 918076 | 918690 | + | 30 | 30 | ON  | 1497.85 | ON  | 543.89 | ON  | 425.49 | ON  | 514.22 | ON  | 421.57 |
| 854 chrSm | alpg: SMC00868  | CDS | 918704 | 919189 | + | 30 | 30 | ON  | 1150.6  | ON  | 544.99 | ON  | 425.49 | ON  | 503.47 | ON  | 436.57 |
| 855 chrSm | nmh: SMC00867   | CDS | 919580 | 920230 | - | 30 | 30 | ON  | 352.75  | ON  | 323.51 | NIL | 289.23 | NIL | 279.95 | NIL | 295.86 |
| 856 chrSm | ? SMC00866      | CDS | 920391 | 921548 | + | 30 | 30 | ON  | 317.44  | NIL | 301.4  | NIL | 370.81 | ON  | 350.5  | NIL | 340.31 |
| 857 chrSm | ? SMC00865      | CDS | 921727 | 922278 | + | 30 | 30 | ON  | 317.44  | NIL | 322.15 | NIL | 371.24 | ON  | 340.09 | NIL | 303.28 |
| 858 chrSm | ? SMC00864      | CDS | 922416 | 923495 | - | 30 | 30 | ON  | 315.63  | NIL | 296.3  | NIL | 361.32 | ON  | 334.62 | NIL | 373.69 |
| 859 chrSm | moab: SMC00863  | CDS | 923950 | 924492 | - | 30 | 30 | NIL | 303.87  | ON  | 328.9  | NIL | 339.02 | ON  | 324.55 | NIL | 306.37 |
| 860 chrSm | lck: SMC00862   | CDS | 924500 | 925405 | - | 30 | 30 | ON  | 436.07  | ON  | 394.38 | ON  | 431.78 | ON  | 415.83 | ON  | 379.35 |
| 861 chrSm | ? SMC00861      | CDS | 925413 | 927242 | - | 30 | 30 | ON  | 457.19  | ON  | 482.25 | ON  | 431.78 | ON  | 459.03 | ON  | 386.18 |
| 862 chrSm | lcpb: SMC00860  | CDS | 927505 | 928521 | - | 30 | 30 | ON  | 647.76  | ON  | 611    | ON  | 575.24 | ON  | 505.66 | ON  | 439.74 |
| 863 chrSm | ? SMC00859      | CDS | 928629 | 928850 | + | 31 | 31 | ON  | 374.63  | ON  | 340.64 | NIL | 284.3  | ON  | 350.69 | NIL | 317.67 |
| 864 chrSm | ? SMC00858      | CDS | 928819 | 929655 | + | 34 | 34 | ON  | 353.17  | ON  | 349.12 | NIL | 354.73 | ON  | 355.46 | NIL | 350.23 |
| 865 chrSm | ? SMC00857      | CDS | 929794 | 930660 | + | 30 | 30 | ON  | 450.32  | ON  | 427.06 | ON  | 386.12 | ON  | 398.54 | ON  | 427.82 |
| 866 chrSm | ? SMC00856      | CDS | 930801 | 930992 | + | 30 | 30 | ON  | 512.33  | ON  | 539.6  | ON  | 394.3  | ON  | 452.56 | ON  | 427.02 |
| 867 chrSm | glyc: SMC00855  | CDS | 931119 | 932054 | + | 30 | 30 | ON  | 423.23  | NIL | 306.3  | NIL | 321.8  | ON  | 333.64 | NIL | 320.35 |
| 868 chrSm | ? SMC00854      | CDS | 932055 | 932300 | - | 30 | 30 | ON  | 396.66  | ON  | 389.49 | NIL | 385.47 | ON  | 447.24 | ON  | 393.68 |
| 869 chrSm | ? SMC00853      | CDS | 932528 | 933076 | + | 30 | 30 | ON  | 393.71  | ON  | 364.36 | NIL | 337.67 | ON  | 353.96 | NIL | 360.5  |
| 870 chrSm | ? SMC00852      | CDS | 933196 | 935130 | + | 30 | 30 | ON  | 386.33  | ON  | 381.45 | NIL | 347.55 | ON  | 373.09 | NIL | 343.39 |
| 871 chrSm | gly: SMC00851   | CDS | 935222 | 937387 | + | 30 | 30 | ON  | 472.91  | ON  | 373.1  | ON  | 427.9  | ON  | 400.73 | ON  | 386.1  |
| 872 chrSm | ? SMC00850      | CDS | 937447 | 937965 | + | 30 | 30 | ON  | 335.82  | ON  | 318.61 | NIL | 314.57 | NIL | 305.44 | ON  | 305.56 |
| 873 chrSm | ? SMC00849      | CDS | 938095 | 938577 | - | 30 | 30 | ON  | 382.48  | ON  | 374.72 | NIL | 362.94 | ON  | 490.66 | ON  | 382.16 |
| 874 chrSm | purD: SMC00993  | CDS | 938694 | 939665 | - | 30 | 30 | ON  | 504.73  | ON  | 381.72 | ON  | 405.13 | ON  | 381.42 | NIL | 337.11 |
| 875 chrSm | ? SMC00992      | CDS | 940092 | 942464 | - | 31 | 31 | ON  | 317.25  | ON  | 347.5  | NIL | 349.13 | ON  | 382.77 | NIL | 355.13 |
| 876 chrSm | ? SMC00991      | CDS | 942461 | 943501 | - | 30 | 30 | ON  | 361.17  | ON  | 456.86 | ON  | 383.4  | ON  | 474.84 | ON  | 384.51 |
| 877 chrSm | lfr: SMC00990   | CDS | 943608 | 944804 | + | 30 | 30 | ON  | 476.1   | ON  | 340.01 | NIL | 275.59 | NIL | 285.73 | NIL | 284.05 |
| 878 chrSm | ? SMC00994      | CDS | 944500 | 945732 | + | 30 | 30 | ON  | 335.33  | ON  | 388.87 | NIL | 354.24 | ON  | 370.58 | NIL | 353.56 |
| 879 chrSm | ? SMC00989      | CDS | 946103 | 946909 | + | 30 | 30 | NIL | 307.99  | NIL | 307.99 | NIL | 316.93 | NIL | 317.76 | NIL | 316.93 |
| 880 chrSm | ubla: SMC00988  | CDS | 946982 | 947938 | + | 30 | 30 | ON  | 380.9   | ON  | 340.57 | NIL | 300.26 | NIL | 327.92 | NIL | 327.92 |
| 881 chrSm | ? SMC00987      | CDS | 948018 | 948584 | + | 30 | 30 | ON  | 419.91  | ON  | 486.95 | NIL | 318.42 | NIL | 457.41 | NIL | 355.66 |
| 882 chrSm | ? SMC00986      | CDS | 948959 | 951268 | + | 30 | 30 | ON  | 373.99  | NIL | 280.11 | NIL | 323.59 | NIL | 300.26 | NIL | 350.63 |
| 883 chrSm | ? SMC00985      | CDS | 948959 | 952806 | - | 30 | 30 | ON  | 359.23  | ON  | 353.67 | NIL | 332.74 | NIL | 358.02 | NIL | 332.74 |
| 884 chrSm | ? SMC00984      | CDS | 951316 | 952806 | - | 30 | 30 | ON  | 422.21  | ON  | 391.94 | NIL | 372.9  | ON  | 372.9  | ON  | 361.56 |
| 885 chrSm | ? SMC00983      | CDS | 953806 | 954439 | - | 30 | 30 | ON  | 357     | ON  | 392.06 | ON  | 384.97 | ON  | 341.94 | NIL | 341.94 |
| 886 chrSm | ? SMC00982      | CDS | 955077 | 956321 | + | 30 | 30 | ON  | 730.66  | NIL | 311.49 | NIL | 297.24 | NIL | 320.32 | NIL | 308.2  |
| 887 chrSm | ? SMC00981      | CDS | 956320 | 957418 | + | 30 | 30 | ON  | 677.49  | ON  | 549.94 | NIL | 415.73 | ON  | 426.93 | NIL | 448.84 |
| 888 chrSm | ? SMC00980      | CDS | 957420 | 958445 | + | 30 | 30 | ON  | 414.88  | ON  | 606.94 | ON  | 387.52 | ON  | 540.95 | ON  | 486.84 |
| 889 chrSm | ? SMC00979      | CDS | 958741 | 959154 | + | 30 | 29 | NIL | 304.23  | ON  | 606.94 | ON  | 387.52 | ON  | 540.95 | ON  | 486.84 |
| 890 chrSm | ? SMC00978      | CDS | 959627 | 960616 | + | 30 | 30 | NIL | 287.73  | NIL | 265.56 | NIL | 294.13 | NIL | 282.78 | NIL | 307.33 |
| 891 chrSm | ? SMC00977      | CDS | 960794 | 962675 | + | 30 | 30 | ON  | 386.46  | ON  | 381.15 | ON  | 396.91 | NIL | 391.97 | NIL | 356.24 |
| 892 chrSm | ? SMC00976      | CDS | 962585 | 963337 | + | 30 | 30 | NIL | 309.61  | ON  | 351.41 | NIL | 305.03 | NIL | 311.49 | NIL | 293.19 |
| 893 chrSm | mcpl: SMC00975  | CDS | 963421 | 965117 | + | 30 | 30 | ON  | 429.79  | NIL | 314.81 | NIL | 373.01 | ON  | 356.51 | NIL | 328.71 |
| 894 chrSm | ? SMC00974      | CDS | 965799 | 967046 | - | 31 | 31 | ON  | 331.22  | ON  | 332.9  | NIL | 335.86 | NIL | 323.13 | NIL | 335.86 |
| 895 chrSm | ? SMC00973      | CDS | 967043 | 967780 | - | 30 | 30 | ON  | 405.24  | ON  | 331.56 | ON  | 393.01 | NIL | 357.82 | NIL | 336.27 |
| 896 chrSm | dxs: SMC00972   | CDS | 967850 | 969787 | - | 30 | 30 | ON  | 463.14  | ON  | 470.71 | NIL | 349.28 | NIL | 392.34 | NIL | 367.72 |
| 897 chrSm | ? SMC00971      | CDS | 969984 | 970907 | + | 30 | 30 | ON  | 420.62  | ON  | 347.64 | NIL | 329.89 | NIL | 328.47 | NIL | 316.27 |
| 898 chrSm | ? SMC00970      | CDS | 971124 | 971375 | - | 30 | 30 | ON  | 344.14  | NIL | 299.68 | NIL | 285.54 | NIL | 290.02 | NIL | 348.4  |
| 899 chrSm | ? SMC00969      | CDS | 971379 | 972308 | - | 30 | 30 | ON  | 665.67  | ON  | 467.18 | NIL | 371.33 | ON  | 426.98 | NIL | 365.92 |
| 900 chrSm | ? SMC00968      | CDS | 973371 | 973399 | + | 30 | 30 | ON  | 348.47  | NIL | 294.8  | NIL | 322.87 | NIL | 331.51 | NIL | 313.75 |
| 901 chrSm | ? SMC00967      | CDS | 973353 | 973754 | + | 31 | 31 | NIL | 303.45  | NIL | 314.46 | NIL | 266.05 | NIL | 304.44 | NIL | 344.2  |
| 902 chrSm | ? SMC00966      | CDS | 973742 | 974935 | + | 31 | 31 | ON  | 392.67  | ON  | 359.63 | ON  | 386.1  | ON  | 415.04 | ON  | 376.42 |
| 903 chrSm | ? SMC00965      | CDS | 974979 | 976415 | - | 30 | 30 | ON  | 357.54  | ON  | 341.38 | NIL | 343.38 | NIL | 327.33 | NIL | 355.01 |
| 904 chrSm | ? SMC00964      | CDS | 976420 | 976491 | - | 30 | 30 | ON  | 442     | ON  | 440.39 | NIL | 356.33 | ON  | 423.37 | NIL | 369.93 |
| 905 chrSm | ? SMC00963      | CDS | 977015 | 977620 | - | 30 | 30 | ON  | 422.42  | ON  | 399.14 | NIL | 353.48 | NIL | 356.2  | NIL | 352.92 |
| 906 chrSm | ? SMC00962      | CDS | 977614 | 978294 | - | 30 | 30 | ON  | 321.77  | ON  | 351.99 | NIL | 344.99 | NIL | 320.64 | NIL | 342.63 |
| 907 chrSm | ? SMC00961      | CDS | 978428 | 979627 | + | 30 | 30 | ON  | 434.45  | ON  | 432.17 | ON  | 356.82 | ON  | 351.73 | NIL | 362.41 |
| 908 chrSm | ? SMC00960      | CDS | 979731 | 981146 | + | 30 | 30 | ON  | 440.41  | ON  | 432.17 | ON  | 414.97 | ON  | 438.31 | ON  | 419.12 |
| 909 chrSm | ? SMC00960      | CDS | 981288 | 982517 | - | 30 | 30 | ON  | 411.39  | ON  | 400.99 | ON  | 443.96 | ON  | 453.02 | ON  | 430.34 |
| 910 chrSm | ? SMC00960      | CDS | 982728 | 983786 | + | 30 | 30 | ON  | 420.43  | ON  | 400.99 | ON  | 445.76 | ON  | 454.78 | ON  | 408.15 |
| 911 chrSm | pdhH: SMC00960  | CDS | 983810 | 984430 | - | 30 | 30 | ON  | 395.71  | ON  | 416.21 | NIL | 340.14 | NIL | 323.34 | NIL | 350.45 |
| 912 chrSm | ? SMC00960      | CDS | 985372 | 985527 | + | 30 | 30 | ON  | 380.33  | ON  | 416.21 | NIL | 317.86 | NIL | 400.83 | NIL | 339.59 |
| 913 chrSm | ? SMC00960      | CDS | 985373 | 985489 | + | 30 | 30 | ON  | 438.35  | ON  | 459.95 | ON  | 440.18 | ON  | 457.94 | ON  | 434.97 |
| 914 chrSm | lbd11: SMC00905 | CDS | 986489 | 987307 | + | 30 | 30 | ON  | 636.73  | ON  | 852    | ON  | 610.6  | ON  | 436.37 | ON  | 436.41 |
| 915 chrSm | ? SMC00906      | CDS | 987452 | 988036 | + | 30 | 30 | ON  | 440.16  | ON  | 398.11 | ON  | 393.7  | ON  | 350.86 | ON  | 400.14 |
| 916 chrSm | ? SMC00907      | CDS | 988047 | 988307 | + | 30 | 30 | ON  | 400.15  | ON  | 449    | ON  | 423.01 | ON  | 411.62 | ON  | 384.68 |
| 917 chrSm | aroc: SMC00907  | CDS | 988748 | 989845 | + | 30 | 30 | ON  | 449.69  | ON  | 364.51 | NIL | 322.38 | ON  | 345    | NIL | 298.32 |
| 918 chrSm | rba: SMC00908   | CDS | 989937 | 991037 | + | 30 | 30 | ON  | 408.87  | ON  | 362.59 | ON  | 372.93 | ON  | 344.06 | NIL | 366.98 |
| 919 chrSm | labb: SMC00971  | CDS | 991106 | 991636 | - | 30 | 30 | ON  | 418.99  | ON  | 362.57 | ON  | 420.2  | ON  | 377.1  | NIL | 343.48 |

|           |                    |      |         |           |    |    |     |         |     |        |     |        |     |         |     |        |
|-----------|--------------------|------|---------|-----------|----|----|-----|---------|-----|--------|-----|--------|-----|---------|-----|--------|
| 920 chrSm | ctac:SMC0009       | CDS  | 992038  | 992922 +  | 30 | 30 | ON  | 1059.68 | ON  | 516.71 | ON  | 439.9  | ON  | 500.11  | ON  | 435.54 |
| 921 chrSm | ctad:SMC0010       | CDS  | 992942  | 994630 +  | 30 | 30 | ON  | 1001.94 | ON  | 564.12 | ON  | 420.4  | ON  | 547.63  | ON  | 419.31 |
| 922 chrSm | ctab:SMC00450      | CDS  | 994627  | 995679 +  | 31 | 31 | ON  | 604.82  | ON  | 380.39 | NIL | 347.45 | ON  | 354.7   | NIL | 341.04 |
| 923 chrSm | ?_SMC00130         | CDS  | 995679  | 995819 +  | 30 | 30 | ON  | 884.67  | ON  | 548.1  | ON  | 412.24 | ON  | 520.36  | ON  | 474.45 |
| 924 chrSm | ctag:SMC00012      | CDS  | 995831  | 996427 +  | 30 | 30 | ON  | 493.05  | ON  | 365.33 | ON  | 397.09 | ON  | 375.09  | ON  | 385.73 |
| 925 chrSm | ctae:SMC00013      | CDS  | 996429  | 997367 +  | 30 | 30 | ON  | 1521    | ON  | 818.45 | ON  | 413.66 | ON  | 653.36  | ON  | 323.14 |
| 926 chrSm | ?_SMC00014         | CDS  | 997562  | 997945 +  | 30 | 30 | ON  | 421.48  | NIL | 291.04 | NIL | 280.73 | ON  | 329.94  | NIL | 367.07 |
| 927 chrSm | ?_SMC00085         | CDS  | 997953  | 998681 +  | 30 | 30 | ON  | 389.96  | ON  | 323.28 | NIL | 320.93 | ON  | 329.94  | ON  | 367.14 |
| 928 chrSm | lytB:SMC00016      | CDS  | 998733  | 999785 +  | 30 | 30 | ON  | 501.64  | ON  | 466.01 | NIL | 373.2  | ON  | 374.01  | NIL | 353.17 |
| 929 chrSm | thrB:SMC00017      | CDS  | 999940  | 1000920 + | 30 | 30 | ON  | 454.32  | ON  | 387.98 | ON  | 380.39 | NIL | 344.65  | ON  | 365.86 |
| 930 chrSm | mhA1:SMC00018      | CDS  | 1000917 | 1001378 + | 30 | 30 | ON  | 349.89  | ON  | 327.58 | NIL | 378.67 | ON  | 348.72  | NIL | 317.01 |
| 931 chrSm | ?_SMC00072         | CDS  | 1001589 | 1002074 - | 30 | 30 | ON  | 424.05  | ON  | 476.56 | ON  | 497.29 | ON  | 432.87  | NIL | 406.4  |
| 932 chrSm | ?_SMC00073         | CDS  | 1002130 | 1003068 - | 30 | 30 | ON  | 311.43  | ON  | 319.83 | ON  | 387.6  | ON  | 340.87  | NIL | 406.4  |
| 933 chrSm | ?_SMC00019         | CDS  | 1003161 | 1003766 + | 30 | 30 | ON  | 345.33  | ON  | 403.38 | NIL | 361.51 | ON  | 411.24  | ON  | 357.23 |
| 934 chrSm | ?_SMC00022         | CDS  | 1003924 | 1006936 - | 30 | 30 | ON  | 372.79  | ON  | 375.02 | NIL | 352.68 | ON  | 348.29  | NIL | 330.94 |
| 935 chrSm | rimJ:SMC00075      | CDS  | 1006836 | 1007447 - | 30 | 30 | ON  | 380.76  | ON  | 430.74 | ON  | 404.73 | ON  | 354.77  | ON  | 397.45 |
| 936 chrSm | ?_SMC00451         | CDS  | 1007719 | 1008963 - | 30 | 30 | ON  | 425.07  | ON  | 405.93 | ON  | 410.66 | ON  | 435.98  | ON  | 425.16 |
| 937 chrSm | thrC1:SMC00077     | CDS  | 1009036 | 1010436 - | 30 | 30 | ON  | 566.46  | ON  | 405.29 | NIL | 312.14 | ON  | 343.31  | NIL | 328.99 |
| 938 chrSm | ?_SMC00020         | CDS  | 1010786 | 1011330 + | 30 | 30 | ON  | 345.77  | ON  | 411.86 | ON  | 390.59 | ON  | 443.62  | ON  | 464.23 |
| 939 chrSm | llyJ:SMC00078      | CDS  | 1011536 | 1012642 - | 30 | 30 | ON  | 1116.29 | ON  | 844.2  | ON  | 492.13 | ON  | 597.47  | ON  | 464.14 |
| 940 chrSm | ?_SMC00079         | CDS  | 1012771 | 1013466 - | 30 | 30 | ON  | 455.93  | ON  | 389.88 | NIL | 327.54 | ON  | 371.77  | NIL | 363.03 |
| 941 chrSm | ?_SMC00080         | CDS  | 1013651 | 1014334 - | 30 | 30 | ON  | 358.7   | ON  | 580.27 | ON  | 378.19 | ON  | 379.51  | ON  | 322.28 |
| 942 chrSm | ccmJ:SMC00021      | CDS  | 1014504 | 1015634 + | 30 | 30 | ON  | 639.71  | ON  | 418.8  | NIL | 413.14 | ON  | 573.71  | ON  | 332.61 |
| 943 chrSm | ?_SMC00081         | CDS  | 1015769 | 1016425 - | 30 | 30 | ON  | 415.83  | ON  | 406.24 | ON  | 344.11 | NIL | 321.04  | NIL | 438    |
| 944 chrSm | mutY:SMC00452      | CDS  | 1016498 | 1017598 - | 30 | 30 | ON  | 388.88  | ON  | 360.72 | NIL | 380.01 | ON  | 369.62  | NIL | 366.92 |
| 945 chrSm | ?_SMC00022         | CDS  | 1017628 | 1018194 - | 30 | 30 | ON  | 355.18  | ON  | 433.33 | ON  | 338.29 | ON  | 341.04  | NIL | 333.53 |
| 946 chrSm | ?_SMC00023         | CDS  | 1018305 | 1019114 + | 30 | 30 | ON  | 509.43  | ON  | 427.62 | ON  | 416.9  | ON  | 391.15  | ON  | 423.09 |
| 947 chrSm | srpE:SMC00024      | CDS  | 1019404 | 1022874 + | 30 | 30 | ON  | 377.87  | ON  | 395.06 | NIL | 394.49 | ON  | 435.47  | ON  | 409.51 |
| 948 chrSm | ppkK:SMC00025      | CDS  | 1023072 | 1025768 + | 30 | 30 | ON  | 430.04  | ON  | 373.79 | ON  | 361.61 | ON  | 384.28  | NIL | 362.58 |
| 949 chrSm | ?_SMC00083         | CDS  | 1026097 | 1026345 - | 30 | 30 | ON  | 360.44  | ON  | 873.44 | NIL | 320.29 | ON  | 393.14  | NIL | 359.68 |
| 950 chrSm | ?_SMC00084         | CDS  | 1026509 | 1026896 - | 30 | 30 | NIL | 255.86  | ON  | 369.18 | NIL | 272.44 | NIL | 275.83  | NIL | 279.5  |
| 951 chrSm | ?_SMC00026         | CDS  | 1027192 | 1028100 + | 30 | 30 | NIL | 462     | ON  | 414.61 | NIL | 370.37 | NIL | 275.83  | NIL | 363.67 |
| 952 chrSm | ?_SMC00087         | CDS  | 1028155 | 1029063 - | 30 | 30 | ON  | 333.68  | ON  | 349.93 | NIL | 340.02 | ON  | 359.98  | NIL | 333    |
| 953 chrSm | trmAGLN-2:SMC00125 | trNA | 1029317 | 1029391 + | 30 | 30 | ON  | 499.48  | ON  | 400.94 | NIL | 334.5  | ON  | 405.59  | ON  | 399.35 |
| 954 chrSm | ?_SMC00027         | CDS  | 1029978 | 1030328 + | 30 | 30 | NIL | 278.67  | NIL | 276.99 | NIL | 348.45 | NIL | 316.75  | ON  | 334.51 |
| 955 chrSm | ?_SMC00028         | CDS  | 1030480 | 1033095 + | 30 | 30 | NIL | 331.03  | NIL | 515.69 | NIL | 334.01 | ON  | 358.72  | ON  | 397.91 |
| 956 chrSm | ?_SMC00088         | CDS  | 1033179 | 1033592 - | 30 | 30 | ON  | 961.58  | ON  | 308.69 | ON  | 561.27 | ON  | 485.11  | ON  | 443.48 |
| 957 chrSm | trmAPRO-2:SMC00126 | trNA | 1033872 | 1033948 + | 30 | 27 | NIL | 724.59  | ON  | 625.33 | NIL | 429.27 | ON  | 496.8   | ON  | 429.27 |
| 958 chrSm | ?_SMC00029         | CDS  | 1034185 | 1034328 + | 30 | 30 | NIL | 187.18  | NIL | 216.75 | NIL | 168.8  | NIL | 187.26  | NIL | 231.56 |
| 959 chrSm | ?_SMC00089         | CDS  | 1034334 | 1034690 - | 30 | 30 | NIL | 285.24  | NIL | 783.94 | NIL | 246.17 | NIL | 263.7   | NIL | 279.68 |
| 960 chrSm | cysN:SMC00090      | CDS  | 1034852 | 1034948 - | 30 | 30 | ON  | 323.38  | ON  | 733.79 | ON  | 541.39 | ON  | 475.01  | ON  | 478.06 |
| 961 chrSm | cysD:SMC00091      | CDS  | 1036348 | 1037301 - | 30 | 30 | ON  | 337.2   | ON  | 526.18 | ON  | 588.73 | ON  | 489.32  | ON  | 418.36 |
| 962 chrSm | cysH:SMC00092      | CDS  | 1037349 | 1038146 - | 30 | 30 | NIL | 299.37  | ON  | 526.18 | ON  | 509.59 | ON  | 421.27  | ON  | 395.64 |
| 963 chrSm | ?_SMC00030         | CDS  | 1038426 | 1038812 + | 30 | 30 | ON  | 316.44  | ON  | 360.86 | ON  | 396.19 | ON  | 414.3   | NIL | 353.07 |
| 964 chrSm | ?_SMC00031         | CDS  | 1038812 | 1039291 + | 30 | 30 | ON  | 321.9   | NIL | 317.2  | NIL | 351.5  | NIL | 330.29  | NIL | 316.68 |
| 965 chrSm | beta:SMC00093      | CDS  | 1039293 | 1040942 - | 30 | 30 | ON  | 611.29  | ON  | 402.6  | NIL | 359.12 | ON  | 404.21  | NIL | 379.16 |
| 966 chrSm | betB:SMC00094      | CDS  | 1041153 | 1042616 - | 30 | 30 | ON  | 612.57  | ON  | 378.51 | NIL | 342.81 | ON  | 345.31  | NIL | 345.31 |
| 967 chrSm | betJ:SMC00127      | CDS  | 1042618 | 1044156 - | 30 | 30 | ON  | 528.16  | ON  | 377.82 | NIL | 308.66 | ON  | 385.98  | NIL | 307.63 |
| 968 chrSm | betI:SMC00095      | CDS  | 1044323 | 1044934 - | 30 | 30 | ON  | 452.76  | ON  | 328.57 | NIL | 318.73 | NIL | 323.23  | NIL | 300.2  |
| 969 chrSm | ?_SMC00032         | CDS  | 1045078 | 1045626 + | 30 | 30 | ON  | 315.72  | ON  | 356.54 | NIL | 306.11 | ON  | 325.16  | NIL | 367.38 |
| 970 chrSm | ?_SMC00033         | CDS  | 1045735 | 1045708 + | 30 | 30 | ON  | 321.26  | ON  | 324.39 | NIL | 373.77 | ON  | 337.41  | NIL | 327.81 |
| 971 chrSm | ?_SMC00034         | CDS  | 1045735 | 1048614 + | 30 | 30 | ON  | 317.78  | NIL | 308.05 | NIL | 373.77 | ON  | 335.15  | NIL | 321.36 |
| 972 chrSm | ?_SMC00096         | CDS  | 1048884 | 1049621 - | 30 | 30 | ON  | 453.86  | ON  | 436.07 | ON  | 583.13 | ON  | 479.34  | ON  | 478.26 |
| 973 chrSm | ?_SMC00035         | CDS  | 1049693 | 1050703 + | 30 | 30 | ON  | 402.63  | ON  | 361.38 | ON  | 457.16 | ON  | 388.38  | ON  | 393.55 |
| 974 chrSm | gstI:SMC00036      | CDS  | 1050794 | 1051414 + | 30 | 30 | ON  | 376.53  | ON  | 413.14 | NIL | 313.59 | ON  | 386.68  | NIL | 308.81 |
| 975 chrSm | ?_SMC00037         | CDS  | 1051802 | 1052710 + | 30 | 30 | ON  | 315.89  | ON  | 528.43 | ON  | 514.95 | ON  | 571.89  | NIL | 478.35 |
| 976 chrSm | gstJ2:SMC00097     | CDS  | 1052739 | 1053398 - | 30 | 30 | ON  | 489     | ON  | 359.64 | ON  | 337.8  | NIL | 337.8   | NIL | 335    |
| 977 chrSm | ?_SMC00038         | CDS  | 1053664 | 1055982 + | 30 | 30 | ON  | 346.59  | ON  | 326.84 | NIL | 367.27 | ON  | 391.65  | NIL | 325.93 |
| 978 chrSm | ?_SMC00039         | CDS  | 1056919 | 1056947 + | 30 | 30 | ON  | 372.68  | ON  | 344.37 | NIL | 309.22 | NIL | 309.35  | NIL | 309.92 |
| 979 chrSm | ?_SMC00098         | CDS  | 1056993 | 1057469 - | 30 | 30 | ON  | 315.6   | ON  | 341.15 | NIL | 327.7  | ON  | 340.28  | NIL | 321.99 |
| 980 chrSm | ?_SMC00040         | CDS  | 1057578 | 1058000 + | 30 | 30 | ON  | 562.56  | ON  | 585.32 | ON  | 472.86 | ON  | 467.28  | NIL | 385.41 |
| 981 chrSm | phnA-1:SMC00099    | CDS  | 1058097 | 1058309 - | 30 | 30 | ON  | 408.41  | ON  | 467    | ON  | 403.87 | ON  | 424.18  | ON  | 381.6  |
| 982 chrSm | ?_SMC00100         | CDS  | 1058318 | 1059880 - | 30 | 30 | ON  | 478.87  | ON  | 550.4  | ON  | 444.04 | ON  | 491.85  | ON  | 399.5  |
| 983 chrSm | ?_SMC00041         | CDS  | 1060171 | 1060566 + | 30 | 30 | ON  | 426.57  | ON  | 444.04 | NIL | 441.06 | ON  | 368.83  | ON  | 384.31 |
| 984 chrSm | ?_SMC00101         | CDS  | 1060630 | 1061457 - | 30 | 30 | NIL | 299.29  | NIL | 309.4  | NIL | 326.16 | NIL | 329.56  | NIL | 369    |
| 985 chrSm | tmr:SMC00225       | CDS  | 1061915 | 1062488 - | 30 | 30 | ON  | 342.67  | ON  | 365.48 | NIL | 347.8  | ON  | 333.12  | NIL | 347.9  |
| 986 chrSm | dne:SMC00103       | CDS  | 1062702 | 1063364 - | 30 | 30 | ON  | 409.28  | ON  | 378.66 | NIL | 344.59 | ON  | 385.65  | NIL | 339.22 |
| 987 chrSm | ?_SMC00104         | CDS  | 1063345 | 1064096 - | 30 | 30 | ON  | 337.86  | ON  | 347.43 | NIL | 317.72 | NIL | 334.13  | NIL | 334.81 |
| 988 chrSm | ?_SMC00105         | CDS  | 1064165 | 1065205 - | 30 | 30 | NIL | 297.85  | ON  | 329.78 | NIL | 338.96 | ON  | 331.72  | NIL | 332.86 |
| 989 chrSm | llyE2:SMC00042     | CDS  | 1065307 | 1066242 + | 30 | 30 | ON  | 425.74  | ON  | 496.21 | ON  | 502.23 | ON  | 468.26  | ON  | 455.36 |
| 990 chrSm | ?_SMC00106         | CDS  | 1066390 | 1066800 - | 30 | 30 | ON  | 327.78  | NIL | 316.26 | ON  | 392.76 | ON  | 361.84  | NIL | 507.89 |
| 991 chrSm | sodB:SMC00043      | CDS  | 1067033 | 1067635 + | 30 | 30 | ON  | 2354.81 | ON  | 1707.4 | ON  | 677.52 | ON  | 1238.23 | ON  | 508.85 |

|            |                  |     |         |           |    |    |     |         |     |         |     |         |     |         |     |         |
|------------|------------------|-----|---------|-----------|----|----|-----|---------|-----|---------|-----|---------|-----|---------|-----|---------|
| 992 chrSm  | ?_SMC00107       | CDS | 1067701 | 1068414 - | 30 | 30 | NIL | 312.51  | ON  | 329.67  | NIL | 351.16  | ON  | 352.91  | NIL | 324.39  |
| 993 chrSm  | CyF: _SMC00044   | CDS | 1068542 | 1069180 + | 30 | 30 | NIL | 294.06  | NIL | 288.01  | NIL | 262.8   | NIL | 268.6   | NIL | 321.52  |
| 994 chrSm  | CyF: _SMC00045   | CDS | 1069385 | 1069834 + | 30 | 30 | ON  | 394.8   | ON  | 363.99  | NIL | 318.77  | ON  | 479.43  | NIL | 439.7   |
| 995 chrSm  | CyG: _SMC00086   | CDS | 1069956 | 1070870 + | 30 | 30 | ON  | 359.92  | ON  | 346.27  | NIL | 349.56  | ON  | 382.61  | ON  | 383.89  |
| 996 chrSm  | ?_SMC00108       | CDS | 1070891 | 1071424 - | 30 | 30 | ON  | 415.9   | ON  | 2473.6  | ON  | 1538.97 | ON  | 2891.64 | ON  | 1889.86 |
| 997 chrSm  | ?_SMC00109       | CDS | 1071584 | 1072051 - | 30 | 30 | ON  | 360.26  | ON  | 334.74  | NIL | 311.07  | ON  | 339.34  | NIL | 325.83  |
| 998 chrSm  | Bla: _SMC0047    | CDS | 1072284 | 1073174 + | 30 | 30 | ON  | 427.12  | ON  | 397.98  | NIL | 468.6   | ON  | 426.67  | ON  | 386.99  |
| 999 chrSm  | gpd: _SMC00110   | CDS | 1073324 | 1075557 - | 30 | 30 | ON  | 403.44  | ON  | 570.32  | ON  | 411.08  | ON  | 412.73  | NIL | 357.91  |
| 1000 chrSm | ?_SMC00413       | CDS | 1075846 | 1077318 - | 30 | 30 | ON  | 315.08  | ON  | 345.92  | NIL | 346.38  | ON  | 374.44  | NIL | 321.37  |
| 1001 chrSm | ?_SMC00112       | CDS | 1077557 | 1077790 - | 33 | 33 | NIL | 288.36  | NIL | 254.87  | NIL | 261.55  | NIL | 255.44  | NIL | 287.84  |
| 1002 chrSm | ?_SMC00112       | CDS | 1077781 | 1078083 - | 30 | 30 | ON  | 356.78  | NIL | 309.39  | ON  | 434.59  | ON  | 327.86  | NIL | 360.11  |
| 1003 chrSm | prtB: _SMC00114  | CDS | 1078096 | 1080231 - | 30 | 30 | ON  | 376.87  | ON  | 430.21  | ON  | 418.29  | ON  | 341.09  | NIL | 339.17  |
| 1004 chrSm | ?_SMC00115       | CDS | 1080391 | 1081281 - | 30 | 30 | ON  | 358.31  | ON  | 404.91  | ON  | 391.53  | ON  | 388.19  | NIL | 365.22  |
| 1005 chrSm | ?_SMC00048       | CDS | 1081641 | 1082063 + | 30 | 30 | ON  | 350.82  | ON  | 409.75  | NIL | 330.43  | ON  | 351.38  | NIL | 332.19  |
| 1006 chrSm | ?_SMC00049       | CDS | 1082124 | 1082468 + | 30 | 30 | NIL | 312.7   | ON  | 337.29  | NIL | 335.16  | ON  | 335.42  | NIL | 324.3   |
| 1007 chrSm | ?_SMC00455       | CDS | 1082739 | 1083401 + | 30 | 30 | ON  | 332.78  | ON  | 375.8   | NIL | 325.87  | ON  | 326.16  | NIL | 370.36  |
| 1008 chrSm | ?_SMC00116       | CDS | 1083682 | 1084179 - | 30 | 30 | ON  | 320.61  | NIL | 282.63  | NIL | 316.85  | NIL | 329.94  | NIL | 352.18  |
| 1009 chrSm | ?_SMC00117       | CDS | 1084374 | 1084835 - | 30 | 30 | ON  | 321.05  | NIL | 355.57  | NIL | 310.6   | NIL | 323.58  | NIL | 334.57  |
| 1010 chrSm | phaA2: _SMC00051 | CDS | 1084503 | 1087409 + | 30 | 30 | ON  | 402.64  | ON  | 367.9   | NIL | 364.99  | ON  | 366.93  | ON  | 374.96  |
| 1011 chrSm | phaB2: _SMC00052 | CDS | 1087406 | 1087825 + | 30 | 30 | ON  | 365.43  | ON  | 359.5   | NIL | 315.78  | NIL | 332.89  | NIL | 412.88  |
| 1012 chrSm | phaC2: _SMC00053 | CDS | 1087825 | 1088202 + | 30 | 30 | ON  | 435.03  | ON  | 401.58  | NIL | 321.59  | NIL | 318.95  | NIL | 337.68  |
| 1013 chrSm | phaD2: _SMC00054 | CDS | 1088209 | 1089774 + | 30 | 30 | ON  | 332.68  | ON  | 331.01  | NIL | 276.23  | NIL | 312.3   | NIL | 338.99  |
| 1014 chrSm | phaE2: _SMC00055 | CDS | 1089771 | 1090247 + | 30 | 30 | ON  | 411.76  | NIL | 404.01  | NIL | 357.04  | ON  | 371.05  | NIL | 312.77  |
| 1015 chrSm | phaF2: _SMC00056 | CDS | 1090244 | 1090615 + | 30 | 30 | ON  | 411.3   | NIL | 315.16  | NIL | 319.37  | NIL | 332.41  | NIL | 318.43  |
| 1016 chrSm | phaG2: _SMC00057 | CDS | 1090615 | 1090965 + | 30 | 30 | NIL | 281.33  | ON  | 280.46  | NIL | 229.31  | NIL | 280.11  | ON  | 274.11  |
| 1017 chrSm | muR: _SMC00058   | CDS | 1091371 | 1091802 + | 30 | 30 | ON  | 622.02  | ON  | 585.23  | NIL | 511.76  | ON  | 496.36  | ON  | 399.6   |
| 1018 chrSm | ?_SMC00118       | CDS | 1092006 | 1092428 - | 30 | 30 | ON  | 392.32  | ON  | 389.04  | NIL | 326.37  | ON  | 357.28  | ON  | 364.14  |
| 1019 chrSm | ?_SMC00456       | CDS | 1092416 | 1093053 - | 30 | 30 | ON  | 328.22  | NIL | 314.5   | NIL | 365.1   | ON  | 363.03  | NIL | 304.4   |
| 1020 chrSm | ?_SMC00059       | CDS | 1093568 | 1095145 + | 30 | 30 | ON  | 336.49  | ON  | 371.02  | NIL | 336.46  | ON  | 366.44  | ON  | 386.41  |
| 1021 chrSm | ?_SMC00060       | CDS | 1095183 | 1096076 + | 30 | 30 | ON  | 353.18  | ON  | 344.03  | ON  | 410.46  | ON  | 401.23  | NIL | 337.5   |
| 1022 chrSm | ?_SMC00061       | CDS | 1096148 | 1096498 + | 30 | 30 | ON  | 322.94  | NIL | 318.05  | NIL | 328.07  | NIL | 401.23  | NIL | 307.63  |
| 1023 chrSm | ?_SMC00120       | CDS | 1096742 | 1097716 - | 30 | 30 | ON  | 456.86  | ON  | 499.03  | ON  | 447.34  | ON  | 338.84  | NIL | 384.88  |
| 1024 chrSm | ?_SMC00062       | CDS | 1098050 | 1099124 + | 30 | 30 | NIL | 367.31  | ON  | 376.59  | ON  | 391.18  | ON  | 370.01  | NIL | 382.19  |
| 1025 chrSm | ?_SMC00063       | CDS | 1098685 | 1099235 - | 30 | 30 | NIL | 297     | NIL | 322.46  | NIL | 383.36  | NIL | 301.37  | NIL | 352.24  |
| 1026 chrSm | ?_SMC00128       | CDS | 1099840 | 1100235 - | 31 | 31 | ON  | 323.13  | ON  | 350.47  | ON  | 341.22  | ON  | 357.19  | NIL | 341.22  |
| 1027 chrSm | ?_SMC00457       | CDS | 1100228 | 1100815 - | 30 | 30 | ON  | 380.59  | ON  | 360.22  | NIL | 310.6   | NIL | 335.09  | NIL | 347.23  |
| 1028 chrSm | pbp: _SMC00122   | CDS | 1100913 | 1103147 - | 30 | 30 | ON  | 324.22  | ON  | 283.78  | NIL | 496.23  | ON  | 471.13  | NIL | 368.59  |
| 1029 chrSm | ?_SMC00064       | CDS | 1103268 | 1103735 + | 30 | 30 | ON  | 321.48  | NIL | 321.48  | NIL | 330.79  | ON  | 481.13  | NIL | 300.05  |
| 1030 chrSm | ?_SMC00123       | CDS | 1103797 | 1104132 - | 30 | 30 | ON  | 368.38  | ON  | 451.72  | ON  | 496.23  | ON  | 871.13  | NIL | 414.72  |
| 1031 chrSm | ?_SMC00065       | CDS | 1104685 | 1104936 + | 30 | 30 | ON  | 354.25  | ON  | 388.44  | NIL | 330.79  | ON  | 315.11  | NIL | 319.57  |
| 1032 chrSm | flp: _SMC00458   | CDS | 1104977 | 1105648 + | 30 | 30 | NIL | 305.25  | NIL | 307.58  | NIL | 343.41  | NIL | 297.06  | NIL | 286.89  |
| 1033 chrSm | flpC: _SMC00129  | CDS | 1105638 | 1107023 + | 30 | 30 | ON  | 369.06  | ON  | 348.75  | NIL | 352.46  | ON  | 404.39  | NIL | 355.8   |
| 1034 chrSm | flpA: _SMC00067  | CDS | 1107235 | 1107645 + | 30 | 30 | ON  | 471.87  | ON  | 579.16  | ON  | 443.16  | ON  | 434.89  | NIL | 378.12  |
| 1035 chrSm | CyH: _SMC02361   | CDS | 1107820 | 1108965 + | 33 | 33 | ON  | 365     | NIL | 335.83  | NIL | 335.71  | NIL | 311.03  | NIL | 298.17  |
| 1036 chrSm | CyL: _SMC02362   | CDS | 1108962 | 1110941 + | 30 | 30 | ON  | 317.58  | NIL | 311.93  | NIL | 285.42  | ON  | 291.34  | NIL | 309.15  |
| 1037 chrSm | CyL: _SMC02363   | CDS | 1109411 | 1111441 + | 30 | 30 | ON  | 420.57  | ON  | 370.03  | ON  | 392.48  | ON  | 331.02  | NIL | 331.02  |
| 1038 chrSm | CyL: _SMC02364   | CDS | 1111502 | 1111957 + | 30 | 30 | NIL | 286.19  | NIL | 294.41  | NIL | 274.32  | NIL | 280.05  | NIL | 310.04  |
| 1039 chrSm | degP1: _SMC02365 | CDS | 1112257 | 1113771 + | 30 | 30 | ON  | 543.25  | ON  | 377.42  | ON  | 460.36  | ON  | 560.82  | ON  | 397.51  |
| 1040 chrSm | ?_SMC02366       | CDS | 1113918 | 1114619 + | 30 | 30 | ON  | 397.78  | ON  | 340.3   | NIL | 370.73  | ON  | 413.52  | ON  | 395.72  |
| 1041 chrSm | ?_SMC02367       | CDS | 1114616 | 1116013 + | 30 | 30 | ON  | 438.79  | ON  | 378.65  | ON  | 495.16  | ON  | 444.31  | ON  | 394.38  |
| 1042 chrSm | glnE: _SMC02368  | CDS | 1116048 | 1119008 + | 30 | 30 | ON  | 434.4   | ON  | 432.46  | NIL | 380.83  | ON  | 402.13  | NIL | 317.14  |
| 1043 chrSm | ?_SMC02369       | CDS | 1119019 | 1121337 - | 30 | 30 | ON  | 434.4   | ON  | 432.46  | NIL | 368.83  | ON  | 402.13  | NIL | 350.14  |
| 1044 chrSm | ppn1: _SMC02370  | CDS | 1121700 | 1124354 - | 30 | 30 | ON  | 417.71  | ON  | 447.37  | NIL | 384.93  | ON  | 409.38  | NIL | 361.3   |
| 1045 chrSm | ?_SMC02371       | CDS | 1121780 | 1125718 + | 30 | 30 | ON  | 314.19  | ON  | 375.07  | NIL | 347.53  | NIL | 399.81  | NIL | 335.03  |
| 1046 chrSm | ?_SMC02372       | CDS | 1125728 | 1127017 - | 30 | 30 | ON  | 419.9   | ON  | 394.58  | NIL | 313.39  | ON  | 332.07  | NIL | 330.14  |
| 1047 chrSm | ?_SMC02373       | CDS | 1127437 | 1127437 - | 30 | 30 | ON  | 884.24  | ON  | 397.13  | NIL | 365.31  | NIL | 340.06  | NIL | 354.79  |
| 1048 chrSm | ?_SMC02374       | CDS | 1127475 | 1127651 - | 30 | 30 | ON  | 380.28  | ON  | 1896.68 | ON  | 731.3   | ON  | 468.46  | NIL | 1171.51 |
| 1049 chrSm | ?_SMC02375       | CDS | 1127790 | 1128650 - | 30 | 30 | ON  | 430.4   | ON  | 356.17  | NIL | 324.67  | ON  | 333.24  | NIL | 344.44  |
| 1050 chrSm | ?_SMC02376       | CDS | 1128723 | 1130012 - | 30 | 30 | ON  | 453.35  | ON  | 336.14  | NIL | 311.29  | NIL | 316.96  | NIL | 339.72  |
| 1051 chrSm | efl: _SMC02377   | CDS | 1130282 | 1131946 + | 30 | 30 | ON  | 469.24  | ON  | 351.83  | NIL | 334.87  | ON  | 382.41  | NIL | 365.6   |
| 1052 chrSm | ?_SMC02378       | CDS | 1132435 | 1133433 + | 30 | 30 | ON  | 1574.94 | ON  | 1173.74 | ON  | 766.38  | ON  | 1211.34 | NIL | 616.48  |
| 1053 chrSm | ?_SMC02379       | CDS | 1134631 | 1134541 + | 30 | 30 | ON  | 542.01  | ON  | 335.03  | NIL | 346.53  | ON  | 425.1   | NIL | 342.79  |
| 1054 chrSm | ?_SMC02380       | CDS | 1134631 | 1135644 - | 30 | 30 | ON  | 366.74  | ON  | 363.69  | NIL | 357.43  | ON  | 349.44  | NIL | 342.79  |
| 1055 chrSm | ?_SMC02381       | CDS | 1135475 | 1136146 + | 30 | 30 | ON  | 350.28  | ON  | 351.47  | ON  | 505.8   | ON  | 475.8   | NIL | 378.87  |
| 1056 chrSm | ?_SMC02382       | CDS | 1136285 | 1137271 + | 30 | 30 | NIL | 298.71  | NIL | 292.55  | NIL | 330.64  | ON  | 311.21  | NIL | 327.5   |
| 1057 chrSm | ?_SMC02383       | CDS | 1137277 | 1138714 - | 30 | 30 | ON  | 344.78  | NIL | 295.53  | NIL | 285.1   | NIL | 314.86  | NIL | 329.65  |
| 1058 chrSm | ?_SMC02384       | CDS | 1138702 | 1139726 - | 30 | 30 | ON  | 456.22  | ON  | 407.33  | NIL | 370.89  | ON  | 341.24  | NIL | 340.16  |
| 1059 chrSm | amr: _SMC02386   | CDS | 1139622 | 1140718 + | 30 | 30 | ON  | 335.36  | ON  | 336.6   | NIL | 328.53  | NIL | 318.51  | NIL | 328.63  |
| 1060 chrSm | ?_SMC02387       | CDS | 1140807 | 1142309 - | 30 | 30 | ON  | 503.5   | ON  | 505.92  | ON  | 408.18  | ON  | 363.81  | NIL | 356.16  |
| 1061 chrSm | ?_SMC02388       | CDS | 1142389 | 1142709 - | 30 | 30 | NIL | 289.58  | NIL | 302.26  | NIL | 278.73  | NIL | 325.9   | NIL | 318.11  |
| 1062 chrSm | ?_SMC02388       | CDS | 1142784 | 1142957 - | 30 | 30 | ON  | 375.73  | ON  | 369.88  | NIL | 278.13  | NIL | 306.53  | ON  | 328.95  |
| 1063 chrSm | ?_SMC02389       | CDS | 1142971 | 1143144 - | 30 | 30 | ON  | 402.15  | ON  | 412.3   | ON  | 398.12  | ON  | 498.16  | ON  | 397.09  |

|            |                    |      |           |           |    |    |     |          |     |          |     |         |     |          |     |         |
|------------|--------------------|------|-----------|-----------|----|----|-----|----------|-----|----------|-----|---------|-----|----------|-----|---------|
| 1064 chrSm | g517:SMC02390      | CDS  | 1143380   | 1144081 + | 30 | 30 | ON  | 451.44   | ON  | 418.21   | NIL | 314.62  | ON  | 344.03   | NIL | 314.7   |
| 1065 chrSm | ?_SMC02391         | CDS  | 1144305   | 1144646 + | 30 | 30 | NIL | 296.89   | NIL | 307.63   | NIL | 380.73  | ON  | 343.56   | NIL | 345.88  |
| 1066 chrSm | ?_SMC02392         | CDS  | 1145097 + | 1145497 + | 30 | 30 | NIL | 310.55   | ON  | 326.06   | NIL | 381.64  | ON  | 395.66   | NIL | 382.65  |
| 1067 chrSm | ?_SMC02393         | CDS  | 1145519   | 1146640 - | 30 | 30 | ON  | 381.6    | ON  | 468.25   | NIL | 367.72  | ON  | 373.77   | ON  | 386.82  |
| 1068 chrSm | IRVASER-3:SMC02409 | IRNA | 1146527   | 1147016 + | 30 | 30 | ON  | 347.06   | NIL | 509.44   | NIL | 286.18  | NIL | 248.17   | NIL | 294.56  |
| 1069 chrSm | ?_SMC02394         | CDS  | 1147310   | 1147618 - | 30 | 30 | NIL | 269.38   | NIL | 297.4    | NIL | 321.61  | NIL | 308.26   | ON  | 322.54  |
| 1070 chrSm | ?_SMC02461         | CDS  | 1147932   | 1147928 - | 30 | 30 | NIL | 398.68   | ON  | 437.3    | NIL | 321.45  | ON  | 397.31   | ON  | 399.49  |
| 1071 chrSm | ?_SMC02396         | CDS  | 1148609   | 1148646 + | 31 | 29 | NIL | 12785.06 | ON  | 12075.35 | ON  | 2247.66 | ON  | 10250.14 | NIL | 2746.19 |
| 1072 chrSm | ?_SMC02397         | CDS  | 1149756   | 1150688 - | 30 | 30 | NIL | 247.86   | ON  | 262.04   | ON  | 293.97  | NIL | 277.82   | NIL | 290.82  |
| 1073 chrSm | Trm11b-5:SMC02398  | CDS  | 1150590   | 1151357 + | 53 | 0  | ON  | 1070.49  | ON  | 692.65   | ON  | 573.47  | ON  | 644.76   | ON  | 558.42  |
| 1074 chrSm | Trm11b-5:SMC02399  | CDS  | 1151291   | 1151896 + | 30 | 28 | ON  | 457.95   | ON  | 381.96   | NIL | 425.71  | ON  | 440.59   | ON  | 363.48  |
| 1075 chrSm | ?_SMC02400         | CDS  | 1151919   | 1152968 - | 30 | 30 | ON  | 409.34   | ON  | 366      | NIL | 315.2   | ON  | 360.17   | NIL | 325.81  |
| 1076 chrSm | ?_SMC02401         | CDS  | 1153182   | 1153658 - | 30 | 30 | ON  | 336.26   | NIL | 307.83   | NIL | 341.61  | NIL | 319.68   | NIL | 358.16  |
| 1077 chrSm | ?_SMC02403         | CDS  | 1153838   | 1155838 - | 30 | 30 | ON  | 460.26   | ON  | 392.64   | ON  | 410.8   | ON  | 415.35   | ON  | 331.89  |
| 1078 chrSm | dapa1:SMC02404     | CDS  | 1156180   | 1157064 + | 30 | 30 | ON  | 365.19   | ON  | 443.96   | NIL | 352.26  | ON  | 403.07   | ON  | 352.34  |
| 1079 chrSm | smPB:SMC02405      | CDS  | 1157064   | 1157543 + | 30 | 30 | ON  | 826.08   | ON  | 1685.5   | ON  | 451.98  | ON  | 562.64   | NIL | 489.9   |
| 1080 chrSm | ?_SMC02406         | CDS  | 1158131   | 1162366 - | 35 | 35 | NIL | 290.84   | ON  | 322.22   | ON  | 402.42  | ON  | 406.58   | NIL | 367.11  |
| 1081 chrSm | ?_SMC02422         | CDS  | 1158929   | 1159585 + | 31 | 31 | ON  | 319.57   | ON  | 346.77   | NIL | 322.76  | ON  | 355.16   | NIL | 364.5   |
| 1082 chrSm | ?_SMC02407         | CDS  | 1162858   | 1163436 + | 30 | 30 | ON  | 629.31   | ON  | 591.95   | ON  | 436.77  | ON  | 503.84   | NIL | 466.39  |
| 1083 chrSm | fp02:SMC02408      | CDS  | 1163909   | 1164316 + | 30 | 30 | ON  | 790.8    | ON  | 498.96   | ON  | 440.51  | ON  | 491.44   | ON  | 459.84  |
| 1084 chrSm | relA:SMC02459      | CDS  | 1164419   | 1166644 + | 30 | 30 | ON  | 405.73   | ON  | 353.69   | NIL | 430.51  | ON  | 491.44   | ON  | 459.84  |
| 1085 chrSm | ?_SMC02658         | CDS  | 1166927 + | 1166927 + | 31 | 31 | ON  | 332.88   | NIL | 280.99   | ON  | 423.73  | ON  | 363.66   | NIL | 373.26  |
| 1086 chrSm | ?_SMC02657         | CDS  | 1166924   | 1167208 + | 30 | 30 | NIL | 238.33   | NIL | 237.13   | NIL | 279.52  | ON  | 392.78   | ON  | 395.03  |
| 1087 chrSm | ?_SMC02656         | CDS  | 1167340   | 1167492 + | 30 | 30 | NIL | 584.01   | ON  | 3085.59  | ON  | 870.75  | ON  | 530.72   | ON  | 264.58  |
| 1088 chrSm | ?_SMC02655         | CDS  | 1167714   | 1168358 + | 30 | 30 | ON  | 369.63   | ON  | 410.76   | NIL | 352.3   | ON  | 337.86   | NIL | 352.47  |
| 1089 chrSm | acps:SMC02654      | CDS  | 1168355   | 1168774 + | 30 | 30 | ON  | 348.8    | ON  | 430.89   | NIL | 312.47  | NIL | 328.53   | ON  | 345.59  |
| 1090 chrSm | lepB:SMC02653      | CDS  | 1168934   | 1169677 + | 30 | 30 | ON  | 597.32   | ON  | 433.54   | ON  | 394.43  | ON  | 394.02   | ON  | 393.52  |
| 1091 chrSm | mC:SMC02652        | CDS  | 1169677   | 1170393 + | 30 | 30 | ON  | 518.7    | ON  | 427.02   | ON  | 462.69  | ON  | 440.94   | ON  | 421.05  |
| 1092 chrSm | era:SMC02651       | CDS  | 1170390   | 1171331 + | 30 | 30 | ON  | 374.64   | ON  | 331.51   | NIL | 376.26  | ON  | 346.5    | ON  | 394.61  |
| 1093 chrSm | brnH:SMC02650      | CDS  | 1172069   | 1172069 - | 30 | 30 | NIL | 298.4    | ON  | 324.1    | NIL | 324.48  | NIL | 324.69   | NIL | 341.41  |
| 1094 chrSm | brnH:SMC02649      | CDS  | 1172062   | 1172484 - | 30 | 30 | ON  | 372.76   | ON  | 404.89   | NIL | 322.74  | NIL | 312      | NIL | 299.79  |
| 1095 chrSm | ?_SMC02648         | CDS  | 1173182   | 1173182 - | 30 | 30 | ON  | 384.12   | ON  | 398.55   | NIL | 360.83  | ON  | 363.52   | NIL | 351.24  |
| 1096 chrSm | ?_SMC02647         | CDS  | 1173595   | 1173595 - | 30 | 30 | ON  | 376.73   | ON  | 353.04   | NIL | 342.47  | ON  | 358.94   | NIL | 311.87  |
| 1097 chrSm | ?_SMC02646         | CDS  | 1173653   | 1174654 - | 30 | 30 | ON  | 367      | ON  | 343.83   | NIL | 342.76  | ON  | 341.38   | NIL | 337.58  |
| 1098 chrSm | claz:SMC02645      | CDS  | 1175221   | 1176477 + | 30 | 30 | ON  | 392.88   | ON  | 548.95   | ON  | 418.65  | ON  | 375.74   | ON  | 418.65  |
| 1099 chrSm | ?_SMC02644         | CDS  | 1176683   | 1178989 + | 30 | 30 | NIL | 266.8    | NIL | 402.81   | NIL | 323.33  | NIL | 303.21   | NIL | 297.8   |
| 1100 chrSm | ?_SMC02642         | CDS  | 1179230   | 1180943 + | 30 | 30 | ON  | 544.12   | ON  | 276.57   | NIL | 423.04  | ON  | 489.63   | ON  | 377.71  |
| 1101 chrSm | rkpK:SMC02641      | CDS  | 1180943   | 1180943 - | 30 | 30 | ON  | 543.15   | ON  | 466.78   | ON  | 385.1   | ON  | 411.38   | NIL | 369.66  |
| 1102 chrSm | lpsL:SMC02640      | CDS  | 1181090   | 1182115 - | 30 | 30 | ON  | 411.06   | ON  | 426.57   | ON  | 387.86  | ON  | 352.4    | NIL | 434.01  |
| 1103 chrSm | ?_SMC02639         | CDS  | 1182187   | 1182519 - | 30 | 30 | ON  | 374.14   | ON  | 378.61   | ON  | 465.73  | ON  | 441.68   | NIL | 461.76  |
| 1104 chrSm | ?_SMC02638         | CDS  | 1182571   | 1183053 + | 30 | 30 | NIL | 352.23   | ON  | 340.55   | NIL | 312.47  | ON  | 364.7    | NIL | 320.55  |
| 1105 chrSm | ?_SMC02637         | CDS  | 1183063   | 1183425 + | 30 | 30 | ON  | 303      | ON  | 415.62   | ON  | 419.7   | ON  | 412.1    | ON  | 400.97  |
| 1106 chrSm | ?_SMC02636         | CDS  | 1183431   | 1184036 - | 30 | 30 | ON  | 480.36   | ON  | 415.62   | ON  | 336.67  | ON  | 332.26   | NIL | 346.58  |
| 1107 chrSm | ?_SMC02635         | CDS  | 1184359   | 1185138 + | 30 | 30 | ON  | 329.3    | ON  | 349.84   | NIL | 341.02  | ON  | 362.2    | NIL | 323.8   |
| 1108 chrSm | ?_SMC02634         | CDS  | 1185444   | 1187447 - | 30 | 30 | ON  | 322.96   | ON  | 334.66   | NIL | 312.56  | NIL | 312.66   | NIL | 286.35  |
| 1109 chrSm | ?_SMC02633         | CDS  | 1187492   | 1190478 + | 30 | 30 | ON  | 316.26   | NIL | 315.75   | NIL | 281.93  | NIL | 293.04   | NIL | 302.13  |
| 1110 chrSm | ?_SMC02632         | CDS  | 1190475   | 1191131 + | 30 | 30 | ON  | 413.04   | ON  | 373.22   | ON  | 331     | NIL | 302.13   | NIL | 355.1   |
| 1111 chrSm | ?_SMC02631         | CDS  | 1192189   | 1192061 + | 30 | 30 | ON  | 377.07   | ON  | 382.92   | ON  | 395.26  | ON  | 491.68   | NIL | 362.96  |
| 1112 chrSm | ?_SMC02603         | CDS  | 1193427 + | 1194689 + | 30 | 30 | ON  | 369.86   | ON  | 362.05   | NIL | 362.12  | ON  | 350.09   | NIL | 333.58  |
| 1113 chrSm | nadA:SMC02601      | CDS  | 1193610   | 1194739   | 30 | 30 | ON  | 388.07   | ON  | 446.49   | NIL | 373.21  | ON  | 373.73   | NIL | 323.61  |
| 1114 chrSm | nadB:SMC02599      | CDS  | 1196337 + | 1197286 + | 30 | 30 | ON  | 445.01   | ON  | 446.62   | ON  | 349.11  | ON  | 406.58   | NIL | 343.3   |
| 1115 chrSm | nadC:SMC02598      | CDS  | 1196387   | 1197908 + | 30 | 30 | ON  | 321.35   | ON  | 330.9    | NIL | 296.39  | NIL | 280.46   | NIL | 329.46  |
| 1116 chrSm | soqC:SMC02597      | CDS  | 1197390   | 1200490 + | 30 | 30 | NIL | 268.05   | NIL | 281.02   | NIL | 345.53  | NIL | 286.7    | NIL | 303.06  |
| 1117 chrSm | ?_SMC02661         | CDS  | 1198811   | 1201814 + | 30 | 30 | NIL | 260.3    | NIL | 279.87   | NIL | 345.53  | NIL | 286.7    | NIL | 303.06  |
| 1118 chrSm | ?_SMC02571         | CDS  | 1200492   | 1201814 + | 30 | 30 | NIL | 260.3    | NIL | 279.87   | NIL | 345.53  | NIL | 286.7    | NIL | 303.06  |
| 1119 chrSm | ?_SMC02660         | CDS  | 1201811   | 1202308 + | 30 | 30 | NIL | 296.29   | ON  | 264.68   | NIL | 300.53  | NIL | 268.84   | NIL | 346.58  |
| 1120 chrSm | ?_SMC02565         | CDS  | 1202486 - | 1203486 - | 35 | 35 | ON  | 359.9    | ON  | 339.67   | ON  | 385.91  | ON  | 354.43   | NIL | 299.96  |
| 1121 chrSm | ?_SMC02561         | CDS  | 1203973 - | 1204584 - | 30 | 30 | ON  | 316.5    | NIL | 272.81   | NIL | 306.25  | NIL | 292.06   | ON  | 333.61  |
| 1122 chrSm | ?_SMC02559         | CDS  | 1203976   | 1204584 - | 30 | 30 | ON  | 358.44   | ON  | 362.33   | NIL | 350.84  | ON  | 344.11   | ON  | 383.14  |
| 1123 chrSm | ?_SMC02558         | CDS  | 1205423 - | 1205423 - | 30 | 30 | ON  | 393.28   | ON  | 380.17   | NIL | 312.85  | ON  | 338.12   | NIL | 316.05  |
| 1124 chrSm | ?_SMC02557         | CDS  | 1205388   | 1206215 - | 30 | 30 | ON  | 412.84   | ON  | 377.89   | NIL | 316.42  | NIL | 321.87   | NIL | 329.57  |
| 1125 chrSm | ?_SMC02556         | CDS  | 1206566   | 1206566 - | 30 | 30 | ON  | 771.37   | ON  | 876.79   | ON  | 532.52  | ON  | 627.09   | ON  | 430.33  |
| 1126 chrSm | ?_SMC02555         | CDS  | 1206725   | 1207168 - | 31 | 31 | ON  | 425.87   | ON  | 443.18   | NIL | 356.75  | ON  | 377.64   | NIL | 338.04  |
| 1127 chrSm | ?_SMC02554         | CDS  | 1207165   | 1207629 - | 30 | 30 | ON  | 430.81   | ON  | 449.02   | NIL | 367.78  | ON  | 428.31   | ON  | 380.12  |
| 1128 chrSm | ?_SMC02553         | CDS  | 1207628   | 1208468 + | 30 | 30 | ON  | 365.13   | ON  | 357.75   | NIL | 376.84  | ON  | 354.77   | NIL | 332.94  |
| 1129 chrSm | ?_SMC02552         | CDS  | 1208465   | 1208794 - | 30 | 30 | ON  | 593.05   | ON  | 484.14   | ON  | 398.4   | ON  | 459.85   | NIL | 367.87  |
| 1130 chrSm | qyS:SMC02551       | CDS  | 1209209   | 1210609 + | 30 | 30 | ON  | 394.5    | ON  | 331.92   | NIL | 342.1   | ON  | 364.39   | NIL | 420.87  |
| 1131 chrSm | ?_SMC02550         | CDS  | 1210660   | 1211142 + | 30 | 30 | ON  | 501.78   | ON  | 482.57   | ON  | 471.33  | ON  | 482.19   | ON  | 345.16  |
| 1132 chrSm | ?_SMC02549         | CDS  | 1211139   | 1211618 + | 30 | 30 | ON  | 437.84   | ON  | 392.37   | NIL | 354.36  | ON  | 485.68   | ON  | 381.87  |
| 1133 chrSm | ?_SMC02548         | CDS  | 1211615   | 1212115 + | 30 | 30 | ON  | 473.36   | ON  | 526.01   | NIL | 354.94  | ON  | 387.5    | NIL | 358.5   |
| 1134 chrSm | pip1:SMC02547      | CDS  | 1212124   | 1213074 + | 30 | 30 | ON  | 489.54   | ON  | 420.73   | ON  | 396.73  | ON  | 455.92   | NIL | 374.15  |
| 1135 chrSm | leuA2:SMC02546     | CDS  | 1213129   | 1214745 + | 30 | 30 | ON  | 379.01   | ON  | 373.52   | NIL | 374.55  | ON  | 357.84   | ON  | 395.37  |

|      |       |             |     |         |         |   |    |    |     |         |     |         |     |        |     |         |     |         |
|------|-------|-------------|-----|---------|---------|---|----|----|-----|---------|-----|---------|-----|--------|-----|---------|-----|---------|
| 1136 | chrSm | 7: SM625545 | CDS | 1214959 | 1215900 | + | 30 | 30 | ON  | 366.46  | ON  | 342.27  | ON  | 387.24 | ON  | 368.36  | ON  | 396.22  |
| 1137 | chrSm | 7: SM625544 | CDS | 1215972 | 1215989 | + | 30 | 30 | ON  | 349.96  | ON  | 351.7   | NIL | 306.05 | ON  | 339.41  | NIL | 321.25  |
| 1138 | chrSm | 7: SM625543 | CDS | 1216832 | 1216841 | + | 30 | 30 | ON  | 462.83  | ON  | 488.07  | ON  | 377.86 | ON  | 492.88  | ON  | 406.7   |
| 1139 | chrSm | 7: SM600550 | CDS | 1218739 | 1218739 |   | 30 | 30 | ON  | 315.38  | NIL | 290.28  | NIL | 300.56 | NIL | 312.99  | NIL | 340.38  |
| 1140 | chrSm | 7: SM600551 | CDS | 1220427 | 1220427 | + | 30 | 30 | ON  | 451.66  | ON  | 390.49  | ON  | 474.2  | ON  | 459.09  | ON  | 444.93  |
| 1141 | chrSm | 7: SM600552 | CDS | 1221437 | 1222306 | + | 30 | 30 | ON  | 468.76  | ON  | 460.94  | ON  | 382.21 | ON  | 416.45  | NIL | 419.77  |
| 1142 | chrSm | 7: SM600553 | CDS | 1222911 | 1222361 | - | 30 | 30 | ON  | 496.97  | ON  | 460.28  | ON  | 382.21 | ON  | 359.11  | NIL | 354.67  |
| 1143 | chrSm | 7: SM600554 | CDS | 1223663 | 1225153 | - | 30 | 30 | ON  | 610.04  | ON  | 487.13  | ON  | 470.09 | ON  | 525.71  | ON  | 506.27  |
| 1144 | chrSm | 7: SM600555 | CDS | 1225300 | 1225899 | - | 30 | 30 | ON  | 374.71  | ON  | 376.33  | ON  | 385.71 | ON  | 410.8   | ON  | 378.6   |
| 1145 | chrSm | 7: SM600556 | CDS | 1225968 | 1227431 | - | 30 | 30 | ON  | 426.77  | ON  | 395.74  | ON  | 431.6  | ON  | 421.92  | ON  | 381.31  |
| 1146 | chrSm | 7: SM600557 | CDS | 1227495 | 1228634 | - | 30 | 30 | NIL | 396.17  | ON  | 388.58  | ON  | 396.57 | NIL | 402.09  | ON  | 413.34  |
| 1147 | chrSm | 7: SM600558 | CDS | 1228768 | 1229625 | - | 30 | 30 | NIL | 283.02  | ON  | 331.25  | NIL | 332.55 | NIL | 309.51  | ON  | 364.06  |
| 1148 | chrSm | 7: SM600559 | CDS | 1229690 | 1230460 | + | 30 | 30 | NIL | 419.6   | ON  | 371.83  | ON  | 446.07 | ON  | 403.37  | NIL | 366.06  |
| 1149 | chrSm | 7: SM600560 | CDS | 1230457 | 1230759 | + | 30 | 30 | NIL | 288.89  | ON  | 335.67  | ON  | 389.15 | ON  | 370.46  | ON  | 404.43  |
| 1150 | chrSm | 7: SM600561 | CDS | 1230911 | 1232410 | - | 30 | 30 | NIL | 440.49  | ON  | 345.67  | ON  | 361.71 | ON  | 343.46  | ON  | 325.37  |
| 1151 | chrSm | 7: SM600562 | CDS | 1232732 | 1233184 | + | 30 | 30 | NIL | 279.62  | NIL | 225.62  | NIL | 316.33 | NIL | 286.5   | ON  | 273.66  |
| 1152 | chrSm | 7: SM600563 | CDS | 1233181 | 1233176 | + | 30 | 30 | NIL | 313.22  | NIL | 298.9   | ON  | 333.6  | NIL | 300.91  | NIL | 321.28  |
| 1153 | chrSm | 7: SM600564 | CDS | 1234173 | 1235861 | + | 30 | 30 | ON  | 384.77  | ON  | 337.51  | ON  | 385.3  | ON  | 346.71  | NIL | 352.78  |
| 1154 | chrSm | 7: SM600565 | CDS | 1236108 | 1236683 | - | 30 | 30 | ON  | 1247.77 | ON  | 657.45  | ON  | 447.45 | ON  | 639.69  | ON  | 412.03  |
| 1155 | chrSm | 7: SM600566 | CDS | 1236719 | 1237672 | - | 30 | 30 | ON  | 502.9   | ON  | 365.26  | NIL | 363.86 | ON  | 370.45  | NIL | 357.2   |
| 1156 | chrSm | 7: SM600567 | CDS | 1237866 | 1238714 | - | 30 | 30 | ON  | 691.53  | ON  | 423.92  | NIL | 334.3  | ON  | 490.55  | ON  | 385.59  |
| 1157 | chrSm | 7: SM600568 | CDS | 1238140 | 1238589 | - | 30 | 30 | ON  | 375.64  | ON  | 1442.62 | ON  | 897.8  | ON  | 1246.92 | ON  | 1095.27 |
| 1158 | chrSm | 7: SM600569 | CDS | 1238933 | 1239265 | + | 30 | 30 | NIL | 231.02  | NIL | 229.31  | NIL | 205.9  | NIL | 213.45  | NIL | 253.78  |
| 1159 | chrSm | 7: SM600570 | CDS | 1239292 | 1240335 | + | 30 | 30 | ON  | 610.9   | ON  | 544.1   | ON  | 431.44 | ON  | 460.26  | NIL | 366.37  |
| 1160 | chrSm | 7: SM600571 | CDS | 1240670 | 1242376 | + | 30 | 30 | ON  | 528.53  | ON  | 334.58  | ON  | 422.26 | ON  | 466.81  | NIL | 365.3   |
| 1161 | chrSm | 7: SM600572 | CDS | 1241639 | 1241614 | + | 30 | 30 | ON  | 743.53  | ON  | 534.2   | ON  | 393.7  | ON  | 439.39  | ON  | 449.69  |
| 1162 | chrSm | 7: SM600573 | CDS | 1242713 | 1242949 | + | 30 | 30 | ON  | 2455.13 | ON  | 1807.74 | ON  | 521.49 | ON  | 991.64  | ON  | 673.6   |
| 1163 | chrSm | 7: SM600574 | CDS | 1243255 | 1244520 | + | 30 | 30 | ON  | 886.05  | ON  | 573.98  | ON  | 382.76 | ON  | 480.91  | ON  | 394.4   |
| 1164 | chrSm | 7: SM600575 | CDS | 1244845 | 1246044 | + | 30 | 30 | ON  | 825.24  | ON  | 545.83  | ON  | 486.44 | ON  | 431.83  | ON  | 403.76  |
| 1165 | chrSm | 7: SM600576 | CDS | 1246291 | 1247178 | + | 30 | 30 | ON  | 507.68  | ON  | 369.73  | ON  | 425.95 | ON  | 411.05  | NIL | 411.97  |
| 1166 | chrSm | 7: SM600577 | CDS | 1247182 | 1247841 | + | 30 | 30 | ON  | 413.61  | NIL | 299.5   | NIL | 368.74 | ON  | 341.09  | NIL | 307     |
| 1167 | chrSm | 7: SM600578 | CDS | 1247904 | 1248032 | + | 30 | 20 | ON  | 785.42  | ON  | 621.24  | ON  | 442.88 | ON  | 497.67  | ON  | 467.37  |
| 1168 | chrSm | 7: SM600579 | CDS | 1248254 | 1249078 | - | 30 | 30 | ON  | 362.76  | NIL | 308.57  | NIL | 347.52 | NIL | 311.97  | NIL | 352.57  |
| 1169 | chrSm | 7: SM600580 | CDS | 1249078 | 1250106 | - | 30 | 30 | ON  | 430.02  | ON  | 351.85  | NIL | 376.02 | ON  | 375.32  | NIL | 324.64  |
| 1170 | chrSm | 7: SM600581 | CDS | 1250116 | 1251066 | - | 30 | 30 | ON  | 461.39  | ON  | 415.4   | ON  | 385.36 | ON  | 421.27  | NIL | 425.33  |
| 1171 | chrSm | 7: SM600582 | CDS | 1251258 | 1253603 | - | 30 | 30 | ON  | 602.69  | ON  | 572.02  | ON  | 400.69 | ON  | 524.76  | ON  | 443.31  |
| 1172 | chrSm | 7: SM600583 | CDS | 1253603 | 1254685 | - | 31 | 31 | ON  | 392.65  | ON  | 323.58  | NIL | 328.9  | NIL | 335.71  | NIL | 323.05  |
| 1173 | chrSm | 7: SM600584 | CDS | 1254682 | 1255854 | - | 30 | 30 | ON  | 421.35  | ON  | 363.54  | NIL | 345.13 | ON  | 448.01  | NIL | 336.65  |
| 1174 | chrSm | 7: SM600585 | CDS | 1256168 | 1257661 | + | 30 | 30 | ON  | 506.43  | ON  | 496.86  | ON  | 396.79 | ON  | 406.49  | ON  | 397.88  |
| 1175 | chrSm | 7: SM600586 | CDS | 1258130 | 1260325 | + | 30 | 30 | NIL | 369.18  | NIL | 308.54  | NIL | 352.63 | NIL | 325.27  | NIL | 425.17  |
| 1176 | chrSm | 7: SM600589 | CDS | 1259399 | 1261354 | + | 30 | 30 | NIL | 307.08  | NIL | 339.79  | NIL | 322.62 | NIL | 318.49  | NIL | 301.82  |
| 1177 | chrSm | 7: SM600590 | CDS | 1260440 | 1263263 | + | 30 | 30 | ON  | 530.26  | ON  | 390.17  | ON  | 400.93 | ON  | 446.76  | NIL | 389.73  |
| 1178 | chrSm | 7: SM600591 | CDS | 1261374 | 1263855 | + | 30 | 30 | ON  | 555.32  | ON  | 424.01  | ON  | 400.48 | ON  | 336.57  | NIL | 371.75  |
| 1179 | chrSm | 7: SM600592 | CDS | 1263574 | 1266745 | + | 30 | 30 | ON  | 320.99  | ON  | 360.25  | NIL | 373.11 | ON  | 346.61  | NIL | 363.26  |
| 1180 | chrSm | 7: SM600593 | CDS | 1264088 | 1267198 | - | 30 | 30 | ON  | 561.96  | ON  | 640.67  | ON  | 478.49 | ON  | 540.84  | ON  | 531.79  |
| 1181 | chrSm | 7: SM600594 | CDS | 1267198 | 1268023 | + | 30 | 30 | ON  | 966.81  | ON  | 328.64  | NIL | 311.59 | NIL | 318.29  | NIL | 304.48  |
| 1182 | chrSm | 7: SM600595 | CDS | 1267334 | 1268548 | + | 30 | 30 | ON  | 596.94  | ON  | 522.46  | ON  | 404.36 | ON  | 512.54  | ON  | 426.59  |
| 1183 | chrSm | 7: SM600596 | CDS | 1268126 | 1269101 | - | 30 | 30 | NIL | 283.55  | NIL | 353.23  | NIL | 373.09 | ON  | 373.02  | NIL | 329.74  |
| 1184 | chrSm | 7: SM600597 | CDS | 1269101 | 1269661 | - | 30 | 30 | NIL | 344.65  | NIL | 333.23  | NIL | 364.51 | ON  | 335.92  | ON  | 448.2   |
| 1185 | chrSm | 7: SM600598 | CDS | 1269729 | 1270625 | + | 30 | 30 | ON  | 336.04  | NIL | 313.79  | NIL | 355.41 | ON  | 365.57  | ON  | 377.24  |
| 1186 | chrSm | 7: SM600599 | CDS | 1270758 | 1271205 | - | 30 | 30 | ON  | 384.77  | NIL | 744.81  | ON  | 437.33 | ON  | 462.74  | ON  | 316.66  |
| 1187 | chrSm | 7: SM600600 | CDS | 1271230 | 1271490 | - | 31 | 31 | ON  | 602.21  | ON  | 480.37  | NIL | 332.88 | ON  | 434.91  | NIL | 471.09  |
| 1188 | chrSm | 7: SM600601 | CDS | 1271487 | 1272074 | - | 30 | 30 | ON  | 486.66  | ON  | 398.41  | ON  | 420.33 | ON  | 412.43  | ON  | 346.72  |
| 1189 | chrSm | 7: SM600602 | CDS | 1272309 | 1274333 | - | 31 | 31 | ON  | 451.91  | ON  | 369.85  | NIL | 420.33 | ON  | 412.43  | ON  | 393.5   |
| 1190 | chrSm | 7: SM600603 | CDS | 1274330 | 1275094 | + | 30 | 30 | ON  | 432.86  | ON  | 369.85  | NIL | 366.97 | ON  | 356.5   | NIL | 342.97  |
| 1191 | chrSm | 7: SM600604 | CDS | 1274330 | 1276095 | + | 30 | 30 | ON  | 661.4   | ON  | 709.82  | ON  | 579.53 | ON  | 1170.14 | ON  | 569.13  |
| 1192 | chrSm | 7: SM600605 | CDS | 1274557 | 1276949 | + | 30 | 30 | ON  | 471.29  | ON  | 424.43  | NIL | 366.87 | ON  | 406.56  | ON  | 398.59  |
| 1193 | chrSm | 7: SM600606 | CDS | 1276341 | 1277704 | - | 30 | 30 | ON  | 327.78  | NIL | 319.56  | NIL | 291.27 | ON  | 406.56  | ON  | 291.95  |
| 1194 | chrSm | 7: SM600607 | CDS | 1277158 | 1278201 | - | 30 | 30 | ON  | 466.93  | ON  | 788.15  | ON  | 505.03 | ON  | 675.07  | NIL | 501.5   |
| 1195 | chrSm | 7: SM600608 | CDS | 1278253 | 1279122 | - | 30 | 30 | ON  | 410.47  | ON  | 365.92  | NIL | 359.87 | ON  | 353.24  | NIL | 362.92  |
| 1196 | chrSm | 7: SM600609 | CDS | 1279122 | 1281323 | + | 30 | 30 | ON  | 383.98  | NIL | 462.8   | ON  | 410.79 | ON  | 397.83  | NIL | 383.24  |
| 1197 | chrSm | 7: SM600610 | CDS | 1281231 | 1282127 | + | 30 | 30 | NIL | 280.86  | NIL | 275     | NIL | 311.53 | NIL | 332.33  | NIL | 322.51  |
| 1198 | chrSm | 7: SM600611 | CDS | 1281531 | 1284774 | + | 30 | 30 | ON  | 280.86  | NIL | 370.68  | NIL | 311.53 | NIL | 332.33  | NIL | 322.51  |
| 1199 | chrSm | 7: SM600612 | CDS | 1284824 | 1285588 | + | 30 | 30 | ON  | 363.29  | ON  | 352.57  | NIL | 340.59 | ON  | 399.43  | NIL | 357.86  |
| 1200 | chrSm | 7: SM600613 | CDS | 1285621 | 1286405 | + | 30 | 30 | NIL | 301.46  | NIL | 321.9   | NIL | 341.97 | NIL | 329.73  | NIL | 337.01  |
| 1201 | chrSm | 7: SM600614 | CDS | 1286215 | 1286877 | - | 30 | 30 | ON  | 407.33  | ON  | 342.3   | NIL | 334.97 | ON  | 337.44  | NIL | 336.29  |
| 1202 | chrSm | 7: SM600615 | CDS | 1286874 | 1287944 | - | 30 | 30 | ON  | 596.06  | ON  | 432.49  | ON  | 399.12 | ON  | 453.31  | ON  | 395.77  |
| 1203 | chrSm | 7: SM600616 | CDS | 1288674 | 1289305 | + | 30 | 30 | ON  | 337.89  | NIL | 324.33  | NIL | 300.45 | NIL | 336.28  | NIL | 299.78  |
| 1204 | chrSm | 7: SM600617 | CDS | 1289190 | 1290050 | + | 30 | 30 | ON  | 348.73  | ON  | 330.37  | NIL | 370.4  | NIL | 315.73  | NIL | 323.84  |
| 1205 | chrSm | 7: SM600618 | CDS | 1290115 | 1292325 | + | 30 | 30 | ON  | 404.79  | ON  | 362.77  | NIL | 350.03 | ON  | 357.39  | NIL | 336.38  |
| 1206 | chrSm | 7: SM600619 | CDS | 1292337 | 1293860 | + | 30 | 30 | ON  | 543.96  | ON  | 445.98  | ON  | 408.94 | ON  | 410.26  | ON  | 390.79  |

[illegible]

|      |       |                     |      |         |         |   |    |    |     |         |     |         |     |        |     |        |
|------|-------|---------------------|------|---------|---------|---|----|----|-----|---------|-----|---------|-----|--------|-----|--------|
| 1280 | chrSm | 7: SMc01908         | CDS  | 1370272 | 1370745 | - | 30 | 30 | NIL | 311.09  | NIL | 342.04  | NIL | 304.37 | NIL | 306.01 |
| 1281 | chrSm | 7: SMc01909         | CDS  | 1371000 | 1372292 | + | 30 | 30 | NIL | 408.87  | NIL | 321.9   | NIL | 323.17 | NIL | 307.33 |
| 1282 | chrSm | 7: SMc01910         | CDS  | 1372292 | 1375753 | + | 30 | 30 | ON  | 430.23  | ON  | 457.31  | ON  | 445.12 | ON  | 388.91 |
| 1283 | chrSm | 7: SMc01911         | CDS  | 1375842 | 1375842 | + | 30 | 30 | ON  | 636.06  | ON  | 677.09  | ON  | 739.15 | ON  | 648.5  |
| 1284 | chrSm | IRNAVAL-1: SMc01938 | IRNA | 1377215 | 1377290 | + | 30 | 30 | ON  | 477.52  | ON  | 472.29  | ON  | 654.23 | ON  | 499.24 |
| 1285 | chrSm | IRNAVAL-1: SMc01938 | IRNA | 1377215 | 1377290 | + | 30 | 30 | ON  | 477.52  | ON  | 472.29  | ON  | 654.23 | ON  | 499.24 |
| 1286 | chrSm | IRNAASP-2: SMc01937 | IRNA | 1377800 | 1377810 | + | 30 | 0  | ON  | 509.96  | ON  | 414.15  | ON  | 378.28 | ON  | 426.14 |
| 1287 | chrSm | IRNAASP-2: SMc01937 | IRNA | 1377800 | 1377810 | + | 30 | 0  | ON  | 509.96  | ON  | 414.15  | ON  | 378.28 | ON  | 426.14 |
| 1288 | chrSm | nuoA1: SMc01913     | CDS  | 1378259 | 1378624 | + | 31 | 31 | ON  | 2878.84 | ON  | 1709.62 | ON  | 728.05 | ON  | 912.79 |
| 1289 | chrSm | nuoA1: SMc01913     | CDS  | 1378259 | 1378624 | + | 30 | 30 | ON  | 971.78  | ON  | 680.44  | ON  | 561.84 | ON  | 550.32 |
| 1290 | chrSm | nuoA1: SMc01914     | CDS  | 1379211 | 1379816 | + | 30 | 30 | ON  | 797.94  | ON  | 498.32  | ON  | 399.84 | ON  | 440.05 |
| 1291 | chrSm | nuoA1: SMc01915     | CDS  | 1379873 | 1381063 | + | 30 | 30 | ON  | 565.32  | ON  | 357.3   | NIL | 338.41 | NIL | 316.09 |
| 1292 | chrSm | 7: SMc01916         | CDS  | 1381063 | 1381317 | + | 30 | 30 | ON  | 444.66  | ON  | 413.92  | NIL | 360.84 | ON  | 369.83 |
| 1293 | chrSm | nuoE1: SMc01917     | CDS  | 1382134 | 1382161 | + | 30 | 30 | ON  | 626.87  | ON  | 489.38  | ON  | 472.72 | ON  | 448.57 |
| 1294 | chrSm | nuoF1: SMc01918     | CDS  | 1383176 | 1383480 | + | 30 | 29 | ON  | 540.7   | ON  | 361.64  | ON  | 391.67 | ON  | 358.1  |
| 1295 | chrSm | 7: SMc01919         | CDS  | 1384332 | 1384431 | + | 30 | 30 | ON  | 592.12  | ON  | 497.1   | ON  | 501.63 | ON  | 490.72 |
| 1296 | chrSm | nuoG1: SMc01920     | CDS  | 1384332 | 1384431 | + | 30 | 30 | ON  | 815.1   | ON  | 505.11  | ON  | 404.67 | ON  | 493.9  |
| 1297 | chrSm | nuoH: SMc01921      | CDS  | 1384334 | 1387477 | + | 30 | 30 | ON  | 573.37  | ON  | 448.37  | ON  | 307.47 | ON  | 348.39 |
| 1298 | chrSm | nuoI: SMc01922      | CDS  | 1387539 | 1388033 | + | 30 | 30 | ON  | 432.59  | NIL | 318.72  | NIL | 311.08 | NIL | 318.17 |
| 1299 | chrSm | nuoJ: SMc01923      | CDS  | 1388185 | 1388799 | + | 30 | 30 | ON  | 594.3   | ON  | 373.3   | NIL | 322.13 | NIL | 361.63 |
| 1300 | chrSm | nuoK1: SMc01924     | CDS  | 1388829 | 1389137 | + | 30 | 30 | ON  | 712.94  | ON  | 380.91  | NIL | 320.81 | NIL | 399.98 |
| 1301 | chrSm | nuoL: SMc01925      | CDS  | 1389145 | 1391139 | + | 30 | 30 | ON  | 796.77  | ON  | 568.99  | NIL | 346.47 | ON  | 396.88 |
| 1302 | chrSm | nuoM: SMc01926      | CDS  | 1391139 | 1392650 | + | 30 | 30 | ON  | 632.62  | ON  | 404.39  | ON  | 353.34 | ON  | 414.61 |
| 1303 | chrSm | nuoN: SMc01927      | CDS  | 1392670 | 1394112 | + | 30 | 30 | ON  | 826.51  | ON  | 606.87  | ON  | 466.79 | ON  | 504.21 |
| 1304 | chrSm | brfA: SMc01928      | CDS  | 1394109 | 1394876 | + | 30 | 30 | ON  | 533.99  | ON  | 412.55  | NIL | 375.07 | ON  | 397.45 |
| 1305 | chrSm | 7: SMc01929         | CDS  | 1396571 | 1396571 | + | 30 | 30 | ON  | 551.73  | ON  | 381.26  | ON  | 426.72 | ON  | 369.23 |
| 1306 | chrSm | 7: SMc01930         | CDS  | 1396630 | 1397034 | + | 30 | 30 | ON  | 352.12  | NIL | 326.99  | NIL | 307.74 | NIL | 290.64 |
| 1307 | chrSm | 7: SMc01931         | CDS  | 1397057 | 1397443 | + | 30 | 30 | ON  | 358.44  | ON  | 325.37  | NIL | 279.38 | NIL | 285.2  |
| 1308 | chrSm | 7: SMc01932         | CDS  | 1397530 | 1397895 | - | 30 | 30 | ON  | 368.94  | ON  | 426.91  | NIL | 376.28 | ON  | 406.09 |
| 1309 | chrSm | 7: SMc01933         | CDS  | 1397889 | 1398104 | - | 30 | 30 | ON  | 454.1   | ON  | 614.32  | ON  | 448.17 | ON  | 496.6  |
| 1310 | chrSm | proS: SMc01934      | CDS  | 1398615 | 1400141 | + | 30 | 30 | ON  | 722.75  | ON  | 556.21  | ON  | 478.24 | ON  | 489.41 |
| 1311 | chrSm | 7: SMc01935         | CDS  | 1400248 | 1401474 | + | 30 | 30 | ON  | 416.73  | NIL | 322.78  | NIL | 340.77 | ON  | 363.68 |
| 1312 | chrSm | 7: SMc01936         | CDS  | 1402147 | 1402178 | + | 30 | 30 | ON  | 520.53  | ON  | 453.84  | ON  | 485.84 | ON  | 385.72 |
| 1313 | chrSm | dhcE1: SMc01937     | CDS  | 1402147 | 1406156 | + | 30 | 30 | ON  | 451.4   | ON  | 366.73  | ON  | 358.73 | ON  | 358.73 |
| 1314 | chrSm | 7: SMc01938         | CDS  | 1406436 | 1407642 | - | 30 | 30 | ON  | 346.86  | ON  | 358.09  | ON  | 373.09 | ON  | 380.98 |
| 1315 | chrSm | dhp: SMc01939       | CDS  | 1407793 | 1409085 | - | 30 | 30 | ON  | 396.97  | ON  | 358.09  | ON  | 373.09 | ON  | 380.98 |
| 1316 | chrSm | 7: SMc01940         | CDS  | 1409292 | 1409561 | + | 30 | 30 | ON  | 514.38  | ON  | 404.75  | ON  | 488.22 | ON  | 447.8  |
| 1317 | chrSm | celR1: SMc01941     | CDS  | 1409718 | 1410089 | + | 30 | 30 | ON  | 517.76  | ON  | 591.26  | NIL | 329.16 | ON  | 563.59 |
| 1318 | chrSm | celR2: SMc01942     | CDS  | 1410107 | 1411474 | + | 30 | 30 | ON  | 330.27  | ON  | 342.06  | NIL | 361.07 | ON  | 501.54 |
| 1319 | chrSm | rpmG: SMc01943      | CDS  | 1411961 | 1412128 | - | 30 | 30 | ON  | 527.27  | ON  | 562.53  | NIL | 263.25 | ON  | 389.89 |
| 1320 | chrSm | 7: SMc01944         | CDS  | 1413420 | 1413407 | - | 30 | 30 | ON  | 394.73  | ON  | 418.92  | NIL | 315.49 | NIL | 358.3  |
| 1321 | chrSm | 7: SMc01945         | CDS  | 1414133 | 1414588 | - | 30 | 30 | ON  | 402.27  | ON  | 352.89  | NIL | 289.18 | ON  | 363.93 |
| 1322 | chrSm | trr: SMc01946       | CDS  | 1414625 | 1416994 | - | 30 | 30 | ON  | 414.91  | ON  | 390.9   | ON  | 361.35 | ON  | 365.19 |
| 1323 | chrSm | topA: SMc01947      | CDS  | 1416925 | 1416994 | - | 30 | 30 | ON  | 433.88  | ON  | 394.86  | ON  | 415.46 | ON  | 386.62 |
| 1324 | chrSm | smt: SMc01948       | CDS  | 1421042 | 1421042 | - | 30 | 30 | ON  | 481.37  | ON  | 429.4   | ON  | 421.04 | ON  | 421.04 |
| 1325 | chrSm | 7: SMc01949         | CDS  | 1421042 | 1421653 | - | 30 | 30 | ON  | 352.79  | ON  | 353.27  | NIL | 321.19 | ON  | 332.96 |
| 1326 | chrSm | 7: SMc01950         | CDS  | 1421683 | 1422972 | - | 30 | 30 | ON  | 552.27  | ON  | 526.04  | ON  | 388.7  | ON  | 426.21 |
| 1327 | chrSm | pyrB: SMc01951      | CDS  | 1422972 | 1423913 | - | 30 | 30 | ON  | 370.01  | NIL | 302.47  | NIL | 302.14 | NIL | 330.68 |
| 1328 | chrSm | aidB: SMc01952      | CDS  | 1425056 | 1425708 | + | 31 | 31 | ON  | 447.95  | ON  | 404.18  | ON  | 399    | ON  | 397.1  |
| 1329 | chrSm | 7: SMc01953         | CDS  | 1426831 | 1426986 | + | 34 | 34 | ON  | 343.63  | ON  | 338.06  | NIL | 308.51 | NIL | 338.22 |
| 1330 | chrSm | 7: SMc01954         | CDS  | 1426831 | 1427318 | + | 31 | 31 | NIL | 272.68  | NIL | 279.56  | NIL | 205.19 | NIL | 252.52 |
| 1331 | chrSm | 7: SMc01955         | CDS  | 1427749 | 1427749 | + | 30 | 30 | ON  | 438.01  | ON  | 378.15  | NIL | 335.84 | ON  | 372.26 |
| 1332 | chrSm | 7: SMc01956         | CDS  | 1428577 | 1428577 | + | 31 | 31 | ON  | 445.84  | ON  | 378.68  | NIL | 681.75 | ON  | 516.64 |
| 1333 | chrSm | gntC: SMc01957      | CDS  | 1428682 | 1428682 | + | 30 | 30 | ON  | 781.97  | ON  | 464.13  | ON  | 319.33 | ON  | 379.13 |
| 1334 | chrSm | gntA: SMc01958      | CDS  | 1429018 | 1430041 | + | 30 | 30 | ON  | 538.5   | ON  | 389.78  | ON  | 412.9  | ON  | 482.6  |
| 1335 | chrSm | gntB: SMc01959      | CDS  | 1430603 | 1430857 | + | 30 | 30 | NIL | 277.54  | NIL | 311.61  | NIL | 323.2  | NIL | 351.95 |
| 1336 | chrSm | 7: SMc01960         | CDS  | 1431144 | 1432694 | + | 30 | 30 | ON  | 618.03  | ON  | 514.93  | ON  | 549.19 | ON  | 332.92 |
| 1337 | chrSm | 7: SMc01961         | CDS  | 1432697 | 1433194 | + | 30 | 30 | ON  | 414.43  | NIL | 314.93  | ON  | 357.77 | ON  | 559.07 |
| 1338 | chrSm | 7: SMc01962         | CDS  | 1433362 | 1433757 | + | 30 | 30 | ON  | 787.5   | ON  | 744.94  | ON  | 337.94 | ON  | 366.36 |
| 1339 | chrSm | 7: SMc01963         | CDS  | 1433876 | 1434328 | + | 30 | 30 | ON  | 425.16  | ON  | 432.82  | NIL | 329.77 | ON  | 502.45 |
| 1340 | chrSm | accC: SMc01964      | CDS  | 1435047 | 1435037 | - | 30 | 30 | ON  | 401.47  | NIL | 305.12  | NIL | 347.05 | NIL | 347.05 |
| 1341 | chrSm | accB: SMc01965      | CDS  | 1436093 | 1436879 | - | 30 | 30 | ON  | 256.05  | ON  | 106.82  | ON  | 282.96 | ON  | 304.27 |
| 1342 | chrSm | 7: SMc01966         | CDS  | 1437489 | 1438256 | - | 30 | 30 | ON  | 1128.21 | ON  | 665.17  | ON  | 530.89 | ON  | 449.28 |
| 1343 | chrSm | 7: SMc01967         | CDS  | 1438256 | 1438256 | - | 30 | 30 | ON  | 455.29  | ON  | 567.66  | ON  | 625.38 | ON  | 604.48 |
| 1344 | chrSm | 7: SMc01968         | CDS  | 1438256 | 1438256 | - | 30 | 30 | ON  | 351.88  | NIL | 342.94  | NIL | 504.63 | ON  | 405.04 |
| 1345 | chrSm | 7: SMc01969         | CDS  | 1438256 | 1438256 | - | 30 | 30 | ON  | 351.88  | NIL | 342.94  | NIL | 504.63 | ON  | 405.04 |
| 1346 | chrSm | 7: SMc01970         | CDS  | 1438256 | 1438256 | - | 30 | 30 | ON  | 351.88  | NIL | 342.94  | NIL | 504.63 | ON  | 405.04 |
| 1347 | chrSm | 7: SMc01971         | CDS  | 1438256 | 1438256 | - | 30 | 30 | ON  | 351.88  | NIL | 342.94  | NIL | 504.63 | ON  | 405.04 |
| 1348 | chrSm | 7: SMc01972         | CDS  | 1438256 | 1438256 | - | 30 | 30 | ON  | 351.88  | NIL | 342.94  | NIL | 504.63 | ON  | 405.04 |
| 1349 | chrSm | 7: SMc01973         | CDS  | 1438256 | 1438256 | - | 30 | 30 | ON  | 351.88  | NIL | 342.94  | NIL | 504.63 | ON  | 405.04 |
| 1350 | chrSm | 7: SMc01974         | CDS  | 1438256 | 1438256 | - | 30 | 30 | ON  | 351.88  | NIL | 342.94  | NIL | 504.63 | ON  | 405.04 |
| 1351 | chrSm | 7: SMc01975         | CDS  | 1438256 | 1438256 | - | 30 | 30 | ON  | 351.88  | NIL | 342.94  | NIL | 504.63 | ON  | 405.04 |
| 1352 | chrSm | 7: SMc01976         | CDS  | 1438256 | 1438256 | - | 30 | 30 | ON  | 351.88  | NIL | 342.94  | NIL | 504.63 | ON  | 405.04 |
| 1353 | chrSm | 7: SMc01977         | CDS  | 1438256 | 1438256 | - | 30 | 30 | ON  | 351.88  | NIL | 342.94  | NIL | 504.63 | ON  | 405.04 |
| 1354 | chrSm | 7: SMc01978         | CDS  | 1438256 | 1438256 | - | 30 | 30 | ON  | 351.88  | NIL | 342.94  | NIL | 504.63 | ON  | 405.04 |
| 1355 | chrSm | 7: SMc01979         | CDS  | 1438256 | 1438256 | - | 30 | 30 | ON  | 351.88  | NIL | 342.94  | NIL | 504.63 | ON  | 405.04 |
| 1356 | chrSm | 7: SMc01980         | CDS  | 1438256 | 1438256 | - | 30 | 30 | ON  | 351.88  | NIL | 342.94  | NIL | 504.63 | ON  | 405.04 |
| 1357 | chrSm | 7: SMc01981         | CDS  | 1438256 | 1438256 | - | 30 | 30 | ON  | 351.88  | NIL | 342.94  | NIL | 504.63 | ON  | 405.04 |
| 1358 | chrSm | 7: SMc01982         | CDS  | 1438256 | 1438256 | - | 30 | 30 | ON  | 351.88  | NIL | 342.94  | NIL | 504.63 | ON  | 405.04 |
| 1359 | chrSm | 7: SMc01983         | CDS  | 1438256 | 1438256 | - | 30 | 30 | ON  | 351.88  | NIL | 342.94  | NIL | 504.63 | ON  | 405.04 |
| 1360 | chrSm | 7: SMc01984         | CDS  | 1438256 | 1438256 | - | 30 | 30 | ON  | 351.88  | NIL | 342.94  | NIL | 504.63 | ON  | 4      |

|      |       |                    |      |         |           |    |    |     |          |     |         |     |         |     |         |     |         |
|------|-------|--------------------|------|---------|-----------|----|----|-----|----------|-----|---------|-----|---------|-----|---------|-----|---------|
| 1352 | chrSm | amcC:SMC01335      | CDS  | 1445167 | 1446399 + | 30 | 30 | ON  | 425.4    | ON  | 340.58  | NIL | 338.27  | ON  | 376.38  | NIL | 328.47  |
| 1353 | chrSm | mrcA1:SMC01334     | CDS  | 1446714 | 1449217 + | 30 | 30 | ON  | 484.11   | ON  | 449.53  | ON  | 390.44  | ON  | 438.85  | ON  | 401.83  |
| 1354 | chrSm | prfB:SMC01333      | CDS  | 1449419 | 1450447 + | 30 | 30 | ON  | 622.47   | ON  | 378.09  | ON  | 382.97  | ON  | 378.04  | ON  | 381.13  |
| 1355 | chrSm | ?_SMC01332         | CDS  | 1450947 | 1451447 - | 30 | 30 | ON  | 483.49   | ON  | 566.32  | ON  | 397.05  | ON  | 380.03  | NIL | 380.94  |
| 1356 | chrSm | ?_SMC01331         | CDS  | 1451534 | 1452307 - | 30 | 30 | ON  | 318.26   | ON  | 326.77  | NIL | 346.87  | NIL | 333.28  | NIL | 350.84  |
| 1357 | chrSm | IRNATHR-3:SMC01377 | IRNA | 1452572 | 1452917 + | 30 | 30 | ON  | 802.24   | ON  | 1080.05 | ON  | 440.7   | ON  | 531.02  | NIL | 365.38  |
| 1358 | chrSm | ?_SMC04435         | CDS  | 1452723 | 1453148 - | 30 | 30 | ON  | 369.75   | ON  | 399.19  | ON  | 386.69  | ON  | 531.64  | NIL | 317.73  |
| 1359 | chrSm | ?_SMC01330         | CDS  | 1453164 | 1454205 - | 30 | 30 | ON  | 390.88   | ON  | 405.74  | NIL | 335.52  | ON  | 390.14  | NIL | 364.54  |
| 1360 | chrSm | acpD:SMC01329      | CDS  | 1453426 | 1454205 + | 30 | 30 | ON  | 324.85   | NIL | 295.25  | NIL | 336.71  | NIL | 335.81  | NIL | 338.2   |
| 1361 | chrSm | ?_SMC01328         | CDS  | 1454152 | 1455426 + | 31 | 31 | ON  | 324.36   | ON  | 295.25  | NIL | 297.74  | NIL | 288.92  | NIL | 305.97  |
| 1362 | chrSm | ?_SMC01327         | CDS  | 1455416 | 1456291 - | 30 | 30 | ON  | 510.16   | ON  | 367.26  | NIL | 368.91  | NIL | 275.22  | NIL | 295.54  |
| 1363 | chrSm | IRNATYR-1:SMC01378 | IRNA | 1456508 | 1456592 + | 30 | 30 | NIL | 294.67   | NIL | 288.28  | NIL | 259.87  | NIL | 260.06  | NIL | 298.42  |
| 1364 | chrSm | IRNAGY-3:SMC01379  | IRNA | 1456592 | 1456592 + | 30 | 30 | NIL | 347.71   | ON  | 1218.78 | ON  | 758.52  | ON  | 1123.11 | NIL | 664.02  |
| 1365 | chrSm | hufB:SMC01326      | CDS  | 1456952 | 1458127 + | 30 | 0  | ON  | 461.84   | ON  | 398.18  | ON  | 382.07  | ON  | 381.37  | NIL | 368.23  |
| 1366 | chrSm | ?_SMC01325         | CDS  | 1459475 | 1459140 + | 30 | 30 | ON  | 277.11   | ON  | 435.42  | NIL | 303.47  | ON  | 393.29  | NIL | 302.79  |
| 1367 | chrSm | ?_SMC01324         | CDS  | 1459246 | 1460156 + | 30 | 30 | NIL | 805.89   | ON  | 533.09  | ON  | 578.67  | ON  | 578.67  | ON  | 642.43  |
| 1368 | chrSm | IRNATRP-1:SMC01381 | IRNA | 1460402 | 1460477 + | 30 | 30 | ON  | 676.82   | ON  | 348.23  | NIL | 377.26  | ON  | 359.53  | ON  | 401.96  |
| 1369 | chrSm | sece:SMC01323      | CDS  | 1460661 | 1460861 + | 30 | 30 | ON  | 1221.76  | ON  | 531.27  | ON  | 475.37  | ON  | 614.11  | ON  | 1245.22 |
| 1370 | chrSm | rusG:SMC01322      | CDS  | 1460878 | 1461408 + | 30 | 30 | ON  | 3601.79  | ON  | 1068.58 | ON  | 849.1   | ON  | 1406.63 | ON  | 1471.61 |
| 1371 | chrSm | prkK:SMC01321      | CDS  | 1461625 | 1462053 + | 30 | 30 | ON  | 1694.71  | ON  | 607.52  | ON  | 654.23  | ON  | 842.96  | ON  | 603.19  |
| 1372 | chrSm | rplA:SMC01320      | CDS  | 1462058 | 1462756 + | 30 | 30 | ON  | 1341.28  | ON  | 665.94  | ON  | 520.38  | ON  | 600.88  | ON  | 606.03  |
| 1373 | chrSm | rplJ:SMC01319      | CDS  | 1463089 | 1463607 + | 30 | 30 | ON  | 825      | ON  | 440.72  | ON  | 430.03  | ON  | 481.45  | NIL | 373.31  |
| 1374 | chrSm | rplL:SMC01318      | CDS  | 1463666 | 1464046 + | 30 | 30 | ON  | 1256.42  | ON  | 673.55  | ON  | 502.18  | ON  | 569.5   | ON  | 485.82  |
| 1375 | chrSm | rpbB:SMC01317      | CDS  | 1464312 | 1468454 + | 30 | 30 | ON  | 1046.1   | ON  | 556.1   | ON  | 628.15  | ON  | 392.39  | ON  | 588.44  |
| 1376 | chrSm | rpoC:SMC01316      | CDS  | 1468640 | 1472845 + | 30 | 30 | ON  | 607.81   | ON  | 399.33  | ON  | 1007.46 | ON  | 1480.45 | ON  | 400.8   |
| 1377 | chrSm | ?_SMC01315         | CDS  | 1473193 | 1473489 - | 30 | 30 | ON  | 4851.25  | ON  | 1313.9  | ON  | 803.53  | ON  | 1084.9  | ON  | 857.96  |
| 1378 | chrSm | rpsL:SMC01314      | CDS  | 1474175 | 1474546 + | 30 | 30 | ON  | 2641.39  | ON  | 850.66  | ON  | 683.64  | ON  | 1035.42 | ON  | 740.61  |
| 1379 | chrSm | rpsG:SMC01313      | CDS  | 1474604 | 1475074 + | 30 | 30 | ON  | 3246.03  | ON  | 980.19  | ON  | 758.52  | ON  | 1123.11 | ON  | 664.02  |
| 1380 | chrSm | hnsA1:SMC01312     | CDS  | 1475104 | 1477203 + | 30 | 30 | ON  | 3477.81  | ON  | 1218.73 | ON  | 758.52  | ON  | 642.43  | ON  | 664.02  |
| 1381 | chrSm | tufA:SMC01311      | CDS  | 1477275 | 1478450 + | 30 | 0  | ON  | 2527.35  | ON  | 674.01  | ON  | 605.42  | ON  | 782.71  | ON  | 500.46  |
| 1382 | chrSm | rplD:SMC01310      | CDS  | 1478593 | 1478901 + | 30 | 30 | ON  | 2695.43  | ON  | 783.33  | ON  | 473.12  | ON  | 669.28  | ON  | 389.94  |
| 1383 | chrSm | rplC:SMC01309      | CDS  | 1479024 | 1479710 + | 31 | 31 | ON  | 2398.21  | ON  | 635.66  | ON  | 491.45  | ON  | 506.85  | ON  | 532.67  |
| 1384 | chrSm | rplW:SMC01308      | CDS  | 1479723 | 1480343 + | 30 | 30 | ON  | 1469.63  | ON  | 619.73  | ON  | 582.58  | ON  | 760.95  | ON  | 932.61  |
| 1385 | chrSm | rplW:SMC01307      | CDS  | 1480340 | 1480633 + | 30 | 30 | ON  | 2042.48  | ON  | 740.05  | ON  | 639.73  | ON  | 932.61  | ON  | 524.2   |
| 1386 | chrSm | rplB:SMC01306      | CDS  | 1480647 | 1481513 + | 30 | 30 | ON  | 3743.79  | ON  | 1165.31 | ON  | 6629.73 | ON  | 875.31  | ON  | 2318.44 |
| 1387 | chrSm | rpsS:SMC01305      | CDS  | 1481529 | 1481807 + | 30 | 30 | ON  | 36429.73 | ON  | 2351.96 | ON  | 875.31  | ON  | 761.07  | ON  | 954.26  |
| 1388 | chrSm | rplV:SMC01304      | CDS  | 1481810 | 1482199 + | 30 | 30 | ON  | 3526.57  | ON  | 3704.97 | ON  | 1000.7  | ON  | 815.97  | ON  | 752.62  |
| 1389 | chrSm | rpsC:SMC01303      | CDS  | 1482199 | 1482912 + | 30 | 30 | ON  | 3704.97  | ON  | 813.63  | ON  | 592.1   | ON  | 414.73  | NIL | 566.62  |
| 1390 | chrSm | rplE:SMC01302      | CDS  | 1483377 | 1483577 + | 30 | 30 | ON  | 2769.24  | ON  | 473.35  | ON  | 400.6   | ON  | 610.62  | ON  | 503.88  |
| 1391 | chrSm | rmpC:SMC01301      | CDS  | 1483591 | 1483827 + | 30 | 30 | ON  | 1746.38  | ON  | 1226.26 | ON  | 1222.16 | ON  | 2176.86 | ON  | 1177.77 |
| 1392 | chrSm | rmpC:SMC01300      | CDS  | 1484006 | 1484374 + | 30 | 30 | ON  | 4381.94  | ON  | 1226.26 | ON  | 610.62  | ON  | 1080.85 | ON  | 503.88  |
| 1393 | chrSm | rplN:SMC01299      | CDS  | 1484389 | 1484700 + | 30 | 30 | ON  | 5398.42  | ON  | 1647.24 | ON  | 1222.16 | ON  | 2176.86 | ON  | 1177.77 |
| 1394 | chrSm | rplE:SMC01298      | CDS  | 1484693 | 1485250 + | 30 | 30 | ON  | 3309.95  | ON  | 778.57  | ON  | 682.11  | ON  | 1107.87 | ON  | 615.97  |
| 1395 | chrSm | rpsN:SMC01297      | CDS  | 1485285 | 1485590 + | 30 | 30 | ON  | 1950.45  | ON  | 621.52  | ON  | 625.27  | ON  | 824.62  | ON  | 476.63  |
| 1396 | chrSm | rpsH:SMC01296      | CDS  | 1485603 | 1486001 + | 30 | 30 | ON  | 1675.26  | ON  | 843.57  | ON  | 545.35  | ON  | 587.51  | ON  | 391.55  |
| 1397 | chrSm | rpsH:SMC01295      | CDS  | 1485603 | 1486001 + | 30 | 30 | ON  | 1675.26  | ON  | 843.57  | ON  | 545.35  | ON  | 587.51  | ON  | 391.55  |
| 1398 | chrSm | rplF:SMC01294      | CDS  | 1486402 | 1486575 + | 30 | 30 | ON  | 2567.3   | ON  | 863.58  | ON  | 747.95  | ON  | 911.52  | ON  | 633.45  |
| 1399 | chrSm | rpsE:SMC01293      | CDS  | 1486588 | 1486950 + | 30 | 30 | ON  | 1970.69  | ON  | 726.4   | ON  | 813.81  | ON  | 678.35  | ON  | 498.62  |
| 1400 | chrSm | rpsE:SMC01292      | CDS  | 1487084 | 1487653 + | 38 | 38 | ON  | 2109.47  | ON  | 864.11  | ON  | 515.91  | ON  | 816.99  | ON  | 610.5   |
| 1401 | chrSm | rmpD:SMC01291      | CDS  | 1487666 | 1487883 + | 30 | 30 | ON  | 4332.84  | ON  | 958.33  | ON  | 823.39  | ON  | 1449.49 | ON  | 1163.39 |
| 1402 | chrSm | rplO:SMC01290      | CDS  | 1487883 | 1488353 + | 30 | 30 | ON  | 2633.42  | ON  | 958.33  | ON  | 709.94  | ON  | 440.95  | ON  | 1016.45 |
| 1403 | chrSm | secY:SMC01289      | CDS  | 1488589 | 1489929 + | 30 | 30 | ON  | 955.69   | ON  | 559.49  | ON  | 490.95  | ON  | 476     | ON  | 383.51  |
| 1404 | chrSm | adk:SMC01288       | CDS  | 1489941 | 1490504 + | 30 | 30 | ON  | 1235.86  | ON  | 640.44  | ON  | 495.57  | ON  | 561.58  | ON  | 473.14  |
| 1405 | chrSm | rpsM:SMC01287      | CDS  | 1490735 | 1491103 + | 30 | 30 | ON  | 2549.16  | ON  | 779.79  | ON  | 543.04  | ON  | 778.17  | ON  | 448.87  |
| 1406 | chrSm | rpsK:SMC01286      | CDS  | 1491330 | 1491719 + | 30 | 30 | ON  | 3741.72  | ON  | 1335.04 | ON  | 697.22  | ON  | 1174.04 | ON  | 757.83  |
| 1407 | chrSm | rpoA:SMC01285      | CDS  | 1491823 | 1492833 + | 30 | 30 | ON  | 4258.96  | ON  | 1275.64 | ON  | 707.77  | ON  | 1271.29 | ON  | 842.23  |
| 1408 | chrSm | rplC:SMC01283      | CDS  | 1492879 | 1493304 + | 30 | 30 | ON  | 1527.72  | ON  | 782.53  | ON  | 518.67  | ON  | 642.56  | ON  | 491.43  |
| 1409 | chrSm | ?_SMC01282         | CDS  | 1493771 | 1494421 - | 30 | 30 | ON  | 316.63   | NIL | 308.85  | NIL | 338.6   | ON  | 334.46  | NIL | 333.56  |
| 1410 | chrSm | ?_SMC01281         | CDS  | 1494424 | 1495365 - | 30 | 30 | ON  | 332.13   | NIL | 333.73  | NIL | 363.67  | NIL | 333.46  | NIL | 324.76  |
| 1411 | chrSm | degP3:SMC01280     | CDS  | 1495755 | 1497152 + | 30 | 30 | ON  | 516.7    | ON  | 429.7   | ON  | 418.87  | ON  | 359.52  | NIL | 351.9   |
| 1412 | chrSm | ?_SMC01279         | CDS  | 1497149 | 1498459 + | 30 | 30 | ON  | 346.5    | ON  | 330.08  | NIL | 345.44  | ON  | 389.52  | NIL | 416     |
| 1413 | chrSm | sageE:SMC01278     | CDS  | 1498459 | 1498939 + | 30 | 30 | NIL | 306.5    | NIL | 277.5   | NIL | 340.18  | ON  | 337.47  | NIL | 311.68  |
| 1414 | chrSm | ?_SMC01277         | CDS  | 1498921 | 1499866 - | 31 | 31 | ON  | 420.35   | ON  | 340.29  | ON  | 459.39  | ON  | 366.47  | ON  | 386.02  |
| 1415 | chrSm | gpr2:SMC01276      | CDS  | 1500544 | 1500544 - | 30 | 30 | ON  | 475.4    | ON  | 378.98  | ON  | 445.84  | ON  | 491.91  | ON  | 467.73  |
| 1416 | chrSm | rnc:SMC01275       | CDS  | 1500544 | 1501536 - | 30 | 30 | ON  | 518.44   | ON  | 433.58  | ON  | 459.39  | ON  | 427.13  | ON  | 397.95  |
| 1417 | chrSm | ?_SMC01274         | CDS  | 1501575 | 1501982 - | 30 | 30 | ON  | 408.37   | ON  | 347.09  | NIL | 364.66  | NIL | 339.27  | ON  | 395.62  |
| 1418 | chrSm | ?_SMC01273         | CDS  | 1501986 | 1502819 - | 30 | 30 | ON  | 396.26   | ON  | 377.22  | NIL | 379.54  | ON  | 358.05  | NIL | 356.37  |
| 1419 | chrSm | ?_SMC01272         | CDS  | 1502836 | 1503495 - | 30 | 30 | ON  | 411.67   | ON  | 344.91  | NIL | 287.26  | NIL | 325.14  | NIL | 284.58  |
| 1420 | chrSm | ?_SMC01271         | CDS  | 1503318 | 1503958 - | 30 | 30 | ON  | 645.56   | ON  | 469.93  | ON  | 429.26  | ON  | 450.84  | ON  | 402.13  |
| 1421 | chrSm | adhC1:SMC01270     | CDS  | 1504032 | 1505159 - | 32 | 2  | ON  | 920.89   | ON  | 678.06  | ON  | 586.93  | ON  | 696.59  | ON  | 451.16  |
| 1422 | chrSm | ?_SMC01269         | CDS  | 1505248 | 1505646 - | 30 | 30 | ON  | 626.87   | ON  | 580.43  | ON  | 520.08  | ON  | 647.2   | ON  | 497.65  |
| 1423 | chrSm | ltpB:SMC01268      | CDS  | 1505829 | 1506587 - | 30 | 30 | ON  | 362.92   | ON  | 365.34  | NIL | 299.73  | NIL | 302.5   | NIL | 290.41  |

|            |                     |      |         |         |   |    |    |     |         |     |         |     |         |     |        |     |        |
|------------|---------------------|------|---------|---------|---|----|----|-----|---------|-----|---------|-----|---------|-----|--------|-----|--------|
| 1424 chrSm | IRNALEU-3: SMC01380 | IRNA | 1506746 | 1506830 | + | 30 | 30 | ON  | 968.47  | ON  | 779.31  | ON  | 585.61  | ON  | 660.11 | ON  | 812.57 |
| 1425 chrSm | ?_SMC01267          | CDs  | 1507415 | 1509364 | + | 30 | 30 | ON  | 376.35  | ON  | 896.03  | ON  | 460.43  | ON  | 570.8  | ON  | 458.87 |
| 1426 chrSm | ?_SMC01266          | CDs  | 1509389 | 1510705 | + | 30 | 30 | NIL | 305.23  | ON  | 449.78  | NIL | 342.97  | ON  | 387.7  | NIL | 364.47 |
| 1427 chrSm | ?_SMC01265          | CDs  | 1510718 | 1512265 | + | 30 | 30 | NIL | 303.78  | ON  | 370.05  | ON  | 455.36  | ON  | 381.14 | NIL | 356.58 |
| 1428 chrSm | ?_SMC01264          | CDs  | 1512871 | 1512877 | - | 30 | 30 | NIL | 555.85  | ON  | 419.47  | ON  | 512.71  | ON  | 582.72 | ON  | 541.37 |
| 1429 chrSm | ?_SMC01263          | CDs  | 1513033 | 1513299 | - | 30 | 30 | ON  | 445.89  | ON  | 464.42  | NIL | 303.82  | ON  | 582.72 | NIL | 326.56 |
| 1430 chrSm | del2: SMC01262      | CDs  | 1513379 | 1513897 | - | 30 | 30 | ON  | 376.51  | ON  | 344.92  | NIL | 355.69  | ON  | 413.7  | NIL | 317    |
| 1431 chrSm | ?_SMC01261          | CDs  | 1514121 | 1515542 | + | 30 | 30 | ON  | 353.33  | ON  | 366.49  | ON  | 380.42  | ON  | 416.61 | NIL | 362.17 |
| 1432 chrSm | ?_SMC01260          | CDs  | 1515627 | 1516013 | + | 30 | 30 | ON  | 442.26  | ON  | 442.69  | NIL | 293.68  | NIL | 334.81 | NIL | 307.02 |
| 1433 chrSm | ?_SMC01259          | CDs  | 1516739 | 1516712 | - | 30 | 30 | ON  | 338.72  | ON  | 361.66  | NIL | 336.58  | NIL | 319.07 | NIL | 338.03 |
| 1434 chrSm | ?_SMC01258          | CDs  | 1516776 | 1517738 | - | 30 | 30 | ON  | 404.2   | ON  | 425.13  | NIL | 336.58  | NIL | 333.16 | NIL | 332.06 |
| 1435 chrSm | ?_SMC01257          | CDs  | 1517878 | 1517857 | - | 30 | 30 | ON  | 320.38  | NIL | 317.22  | NIL | 270.65  | NIL | 269.28 | NIL | 280.17 |
| 1436 chrSm | sda: SMC01256       | CDs  | 1519212 | 1520612 | + | 30 | 30 | ON  | 384.87  | ON  | 353.76  | NIL | 398.63  | NIL | 342.14 | NIL | 341.03 |
| 1437 chrSm | ?_SMC00995          | CDs  | 1520699 | 1521133 | + | 30 | 30 | ON  | 391.7   | NIL | 275.97  | NIL | 370.05  | NIL | 324.67 | NIL | 333.9  |
| 1438 chrSm | ?_SMC01068          | CDs  | 1521805 | 1522074 | - | 30 | 30 | ON  | 539.37  | ON  | 576.33  | ON  | 531.75  | NIL | 856.81 | ON  | 457.2  |
| 1439 chrSm | ?_SMC00996          | CDs  | 1522150 | 1523571 | - | 30 | 30 | ON  | 654.69  | ON  | 625.76  | ON  | 498.53  | ON  | 776.11 | NIL | 529.52 |
| 1440 chrSm | ?_SMC00997          | CDs  | 1523896 | 1524624 | - | 30 | 30 | ON  | 320.53  | ON  | 334.15  | NIL | 341.95  | NIL | 331    | ON  | 336.86 |
| 1441 chrSm | ?_SMC00998          | CDs  | 1524854 | 1525462 | - | 30 | 30 | ON  | 327.34  | ON  | 384.11  | NIL | 359.04  | ON  | 470.4  | ON  | 379.08 |
| 1442 chrSm | ?_SMC00999          | CDs  | 1526319 | 1526927 | - | 30 | 30 | ON  | 321.33  | ON  | 335.45  | NIL | 316.62  | ON  | 385.67 | NIL | 346.39 |
| 1443 chrSm | ?_SMC01000          | CDs  | 1526995 | 1527657 | - | 30 | 30 | ON  | 350.19  | ON  | 358.26  | ON  | 439.03  | ON  | 349.6  | NIL | 366.62 |
| 1444 chrSm | ?_SMC01001          | CDs  | 1527939 | 1528670 | + | 30 | 30 | ON  | 421.19  | ON  | 387.9   | NIL | 376.13  | ON  | 370.2  | NIL | 346.86 |
| 1445 chrSm | ?_SMC01002          | CDs  | 1529066 | 1529494 | + | 30 | 30 | NIL | 270.73  | ON  | 369.39  | NIL | 290.44  | ON  | 360.88 | NIL | 312.5  |
| 1446 chrSm | ?_SMC01003          | CDs  | 1530936 | 1530936 | - | 30 | 30 | NIL | 360.89  | ON  | 389.82  | NIL | 294.59  | ON  | 419.3  | NIL | 376.16 |
| 1447 chrSm | hs1: SMC01004       | CDs  | 1531283 | 1531735 | - | 30 | 30 | ON  | 413.73  | ON  | 399.8   | ON  | 435.64  | ON  | 446.16 | ON  | 406.41 |
| 1448 chrSm | f0E1: SMC01005      | CDs  | 1532451 | 1532451 | - | 30 | 30 | ON  | 508     | ON  | 568.26  | ON  | 470.6   | ON  | 455.89 | ON  | 382.34 |
| 1449 chrSm | ?_SMC01006          | CDs  | 1532790 | 1533236 | + | 30 | 30 | ON  | 322.97  | ON  | 382.9   | NIL | 328.47  | ON  | 353.01 | NIL | 301.31 |
| 1450 chrSm | ?_SMC01007          | CDs  | 1533240 | 1533614 | + | 30 | 30 | ON  | 326.93  | NIL | 313.21  | NIL | 362.15  | ON  | 337.21 | NIL | 330.68 |
| 1451 chrSm | ?_SMC01008          | CDs  | 1533611 | 1534048 | + | 30 | 30 | ON  | 325.89  | ON  | 346.13  | NIL | 353.08  | NIL | 334.98 | NIL | 329.14 |
| 1452 chrSm | ?_SMC01009          | CDs  | 1534045 | 1534584 | + | 30 | 30 | ON  | 334.04  | NIL | 300.82  | NIL | 358.68  | ON  | 337.39 | NIL | 368.69 |
| 1453 chrSm | IRHS: SMC01010      | CDs  | 1534693 | 1536678 | + | 30 | 30 | ON  | 523.45  | ON  | 366.94  | ON  | 438.79  | ON  | 406.29 | NIL | 365.08 |
| 1454 chrSm | ?_SMC01011          | CDs  | 1536883 | 1537878 | - | 30 | 30 | ON  | 543.57  | ON  | 462.58  | NIL | 370.49  | ON  | 419.37 | NIL | 365.08 |
| 1455 chrSm | ?_SMC01012          | CDs  | 1537979 | 1538563 | + | 30 | 30 | ON  | 377.92  | ON  | 403.46  | NIL | 349.28  | ON  | 381.19 | ON  | 380.95 |
| 1456 chrSm | ?_SMC01013          | CDs  | 1538563 | 1539165 | + | 30 | 30 | ON  | 333.93  | ON  | 332.44  | ON  | 463.08  | ON  | 395.11 | NIL | 404.78 |
| 1457 chrSm | ?_SMC01014          | CDs  | 1539174 | 1539884 | - | 30 | 30 | ON  | 396.41  | ON  | 447.25  | ON  | 387.31  | ON  | 409.68 | NIL | 364.71 |
| 1458 chrSm | ?_SMC01015          | CDs  | 1539957 | 1541090 | + | 30 | 30 | ON  | 351.44  | ON  | 375.3   | NIL | 332.27  | ON  | 381.33 | NIL | 353.19 |
| 1459 chrSm | ?_SMC01016          | CDs  | 1541106 | 1541537 | - | 30 | 30 | NIL | 263.5   | ON  | 347.89  | NIL | 344.21  | NIL | 308.86 | NIL | 306.62 |
| 1460 chrSm | ?_SMC01017          | CDs  | 1541234 | 1542234 | + | 30 | 30 | ON  | 264.12  | NIL | 264.81  | NIL | 261.36  | ON  | 235.64 | NIL | 298.81 |
| 1461 chrSm | parE: SMC01018      | CDs  | 1542251 | 1544311 | - | 30 | 30 | ON  | 635.32  | ON  | 472.53  | ON  | 439.43  | ON  | 408.57 | ON  | 403.14 |
| 1462 chrSm | ?_SMC01019          | CDs  | 1544555 | 1545439 | + | 30 | 30 | ON  | 335.65  | ON  | 349.31  | NIL | 343.48  | NIL | 327.4  | NIL | 385.56 |
| 1463 chrSm | ?_SMC01020          | CDs  | 1545468 | 1546795 | + | 30 | 30 | NIL | 295.88  | NIL | 302.86  | NIL | 326.85  | ON  | 339.48 | NIL | 324.5  |
| 1464 chrSm | ?_SMC01021          | CDs  | 1546795 | 1547395 | - | 31 | 31 | NIL | 279.44  | NIL | 270.62  | NIL | 358.21  | NIL | 324.5  | NIL | 325.06 |
| 1465 chrSm | ?_SMC01022          | CDs  | 1547392 | 1548018 | - | 30 | 30 | ON  | 388.06  | ON  | 366.31  | ON  | 452.65  | ON  | 382.65 | ON  | 384.21 |
| 1466 chrSm | lp1A1: SMC01023     | CDs  | 1548277 | 1549047 | + | 30 | 30 | ON  | 579.08  | ON  | 471.16  | ON  | 452.38  | ON  | 545.37 | ON  | 419.01 |
| 1467 chrSm | ?_SMC01024          | CDs  | 1549170 | 1549655 | + | 30 | 30 | ON  | 843.2   | ON  | 540.84  | ON  | 392.22  | ON  | 519.03 | NIL | 450.79 |
| 1468 chrSm | pyrG: SMC01025      | CDs  | 1549799 | 1551427 | + | 30 | 30 | ON  | 562.19  | ON  | 360.78  | NIL | 353.82  | ON  | 344.61 | NIL | 324.13 |
| 1469 chrSm | ?_SMC01026          | CDs  | 1551580 | 1552470 | + | 30 | 30 | ON  | 373.93  | ON  | 333.91  | NIL | 300.6   | NIL | 291.17 | NIL | 325.79 |
| 1470 chrSm | kdsA: SMC01027      | CDs  | 1552470 | 1553412 | + | 30 | 30 | ON  | 818.49  | ON  | 540.88  | ON  | 468.33  | NIL | 498.68 | ON  | 406.68 |
| 1471 chrSm | eno: SMC01028       | CDs  | 1553447 | 1554721 | + | 30 | 30 | ON  | 709.1   | ON  | 537.03  | ON  | 397.35  | ON  | 489.74 | NIL | 363.38 |
| 1472 chrSm | ?_SMC01029          | CDs  | 1555529 | 1555810 | + | 30 | 30 | ON  | 1564.71 | ON  | 621.21  | ON  | 460.22  | ON  | 764.85 | ON  | 493.72 |
| 1473 chrSm | pdbA: SMC01030      | CDs  | 1555947 | 1556993 | + | 30 | 30 | ON  | 1370.22 | ON  | 2003.61 | ON  | 1285.71 | ON  | 712.09 | ON  | 670.69 |
| 1474 chrSm | pdbB: SMC01031      | CDs  | 1557011 | 1558393 | + | 30 | 30 | ON  | 815.34  | ON  | 1125.92 | ON  | 831.74  | ON  | 575.47 | ON  | 520.08 |
| 1475 chrSm | pdbB: SMC01032      | CDs  | 1558406 | 1559749 | + | 30 | 30 | ON  | 623.44  | ON  | 640.94  | ON  | 512.78  | ON  | 432.93 | ON  | 385.29 |
| 1476 chrSm | ?_SMC01033          | CDs  | 1559806 | 1560447 | + | 30 | 30 | ON  | 452.1   | ON  | 782.09  | ON  | 593.09  | ON  | 471.25 | ON  | 517.52 |
| 1477 chrSm | ?_SMC01034          | CDs  | 1560444 | 1561031 | + | 30 | 30 | ON  | 443.19  | ON  | 468.13  | NIL | 355.63  | ON  | 345.69 | NIL | 350.84 |
| 1478 chrSm | lpdA1: SMC01035     | CDs  | 1561049 | 1562494 | + | 30 | 30 | ON  | 610.12  | ON  | 1033.82 | ON  | 511.35  | ON  | 454.85 | ON  | 413.68 |
| 1479 chrSm | ?_SMC01036          | CDs  | 1562570 | 1562821 | + | 30 | 30 | ON  | 651.5   | ON  | 930.52  | ON  | 512.46  | ON  | 449.71 | ON  | 426.88 |
| 1480 chrSm | lp1A: SMC01037      | CDs  | 1562956 | 1563924 | + | 30 | 30 | ON  | 484.68  | ON  | 505.98  | ON  | 503.72  | ON  | 480.46 | ON  | 496.32 |
| 1481 chrSm | ?_SMC04865          | CDs  | 1564169 | 1564873 | - | 30 | 30 | ON  | 291.67  | ON  | 309.78  | NIL | 261.21  | NIL | 284.66 | NIL | 311.57 |
| 1482 chrSm | ?_SMC01038          | CDs  | 1564561 | 1565400 | + | 31 | 31 | NIL | 282.35  | NIL | 309.13  | NIL | 269.5   | NIL | 265.59 | NIL | 267.99 |
| 1483 chrSm | ?_SMC01039          | CDs  | 1565388 | 1565885 | - | 31 | 31 | NIL | 349.37  | NIL | 321.22  | NIL | 346.82  | NIL | 321.21 | NIL | 313.39 |
| 1484 chrSm | ?_SMC01040          | CDs  | 1565866 | 1567170 | - | 30 | 30 | ON  | 428.23  | ON  | 381.07  | NIL | 361.82  | NIL | 353.23 | ON  | 387.06 |
| 1485 chrSm | ?_SMC01041          | CDs  | 1567247 | 1568275 | + | 30 | 30 | ON  | 334.54  | ON  | 325.57  | NIL | 317.61  | NIL | 302.17 | NIL | 315.59 |
| 1486 chrSm | ntrB: SMC01042      | CDs  | 1568272 | 1569240 | + | 30 | 30 | ON  | 389.14  | NIL | 321.19  | ON  | 389.76  | ON  | 372.97 | NIL | 338.94 |
| 1487 chrSm | ntrC: SMC01043      | CDs  | 1569417 | 1570871 | + | 30 | 30 | ON  | 351.77  | ON  | 358.86  | NIL | 356.27  | ON  | 387.73 | NIL | 366.25 |
| 1488 chrSm | ntrY: SMC01044      | CDs  | 1571105 | 1573366 | + | 30 | 30 | ON  | 464.53  | ON  | 434.49  | ON  | 439.62  | ON  | 396.73 | NIL | 366.45 |
| 1489 chrSm | ntrX: SMC01045      | CDs  | 1573356 | 1574720 | + | 30 | 30 | ON  | 371.59  | ON  | 356.78  | NIL | 346.24  | ON  | 335.93 | NIL | 389.91 |
| 1490 chrSm | IRNA: SMC01046      | CDs  | 1574755 | 1576151 | + | 30 | 30 | ON  | 362.51  | ON  | 333.9   | NIL | 339.82  | ON  | 343.98 | NIL | 359.87 |
| 1491 chrSm | ?_SMC01047          | CDs  | 1576163 | 1577026 | + | 30 | 30 | ON  | 451.9   | ON  | 451.76  | NIL | 364.07  | ON  | 382.02 | NIL | 348.13 |
| 1492 chrSm | ntrA: SMC01048      | CDs  | 1577148 | 1577369 | + | 30 | 30 | ON  | 487.51  | ON  | 375.1   | NIL | 328.16  | ON  | 378.87 | NIL | 356.92 |
| 1493 chrSm | IRNA: SMC01049      | CDs  | 1577376 | 1578773 | + | 30 | 30 | ON  | 479.7   | ON  | 402.66  | ON  | 424.71  | ON  | 412.62 | NIL | 402.76 |
| 1494 chrSm | IRNA20-2: SMC01050  | CDs  | 1579087 | 1580259 | - | 74 | 0  | ON  | 351.96  | ON  | 359.43  | ON  | 333.29  | ON  | 367.97 | NIL | 325.53 |
| 1495 chrSm | ?_SMC01051          | CDs  | 1581612 | 1582445 | - | 30 | 30 | ON  | 527.48  | ON  | 415.58  | NIL | 364.11  | ON  | 388.87 | NIL | 365.99 |

|      |       |                |     |         |         |   |    |    |     |         |     |         |     |         |     |         |     |         |
|------|-------|----------------|-----|---------|---------|---|----|----|-----|---------|-----|---------|-----|---------|-----|---------|-----|---------|
| 1496 | chrSm | ?_SM601052     | CDS | 1582449 | 1583036 | - | 30 | 30 | ON  | 532.45  | ON  | 457.29  | NIL | 371.04  | ON  | 435.14  | NIL | 365.83  |
| 1497 | chrSm | CySG_SMC01053  | CDS | 1582760 | 1584717 | - | 30 | 30 | ON  | 324.7   | ON  | 370.29  | NIL | 380.77  | ON  | 361.24  | NIL | 355.44  |
| 1498 | chrSm | ?_SM601054     | CDS | 1584728 | 1585045 | + | 30 | 30 | ON  | 354.08  | ON  | 591.91  | ON  | 456.06  | ON  | 437.21  | NIL | 359.85  |
| 1499 | chrSm | ?_SM60124      | CDS | 1585061 | 1586734 | + | 30 | 30 | ON  | 425.36  | ON  | 758.65  | ON  | 521.66  | ON  | 554     | ON  | 609.98  |
| 1500 | chrSm | ?_SM602123     | CDS | 1586152 | 1587252 | + | 30 | 30 | ON  | 329.53  | ON  | 593.01  | ON  | 382.49  | ON  | 441.09  | NIL | 323.81  |
| 1501 | chrSm | fpr_SMC02122   | CDS | 1587398 | 1588720 | + | 30 | 30 | ON  | 397.79  | ON  | 504.04  | ON  | 449.17  | ON  | 433.64  | ON  | 458.18  |
| 1502 | chrSm | relE_SMC04436  | CDS | 1588451 | 1589607 | - | 30 | 30 | ON  | 359.39  | NIL | 521.3   | NIL | 362.12  | ON  | 363.15  | NIL | 342.57  |
| 1503 | chrSm | aapP_SMC02121  | CDS | 1588831 | 1589607 | - | 30 | 30 | ON  | 841.93  | ON  | 642.5   | ON  | 471.73  | ON  | 659.72  | ON  | 483.50  |
| 1504 | chrSm | aapM_SMC02120  | CDS | 1589826 | 1590780 | - | 30 | 30 | ON  | 411.3   | ON  | 369.29  | NIL | 272.77  | NIL | 329.75  | NIL | 348.54  |
| 1505 | chrSm | aapQ_SMC02119  | CDS | 1590785 | 1591978 | - | 30 | 30 | ON  | 670.33  | ON  | 532.8   | NIL | 328.68  | ON  | 475.06  | ON  | 379.29  |
| 1506 | chrSm | aapJ_SMC02118  | CDS | 1592083 | 1594633 | + | 30 | 30 | ON  | 1339.19 | ON  | 1179.13 | ON  | 641.38  | ON  | 921.95  | ON  | 551.93  |
| 1507 | chrSm | meiC_SMC02117  | CDS | 1594468 | 1594633 | + | 30 | 30 | ON  | 445.56  | ON  | 399.9   | ON  | 389.15  | ON  | 385.51  | ON  | 404.12  |
| 1508 | chrSm | ?_SM602116     | CDS | 1594688 | 1595463 | - | 30 | 30 | ON  | 422.42  | ON  | 362.99  | ON  | 405.82  | ON  | 335.84  | NIL | 353.44  |
| 1509 | chrSm | ?_SM602115     | CDS | 1595679 | 1596124 | - | 30 | 30 | ON  | 380.63  | ON  | 353.62  | NIL | 245.09  | NIL | 310.05  | ON  | 315.44  |
| 1510 | chrSm | ?_SM602114     | CDS | 1596314 | 1597093 | + | 30 | 30 | ON  | 476.03  | ON  | 458.27  | ON  | 449.24  | ON  | 447.42  | ON  | 409.69  |
| 1511 | chrSm | CySE_SMC02113  | CDS | 1597291 | 1598218 | + | 30 | 30 | ON  | 398.08  | ON  | 408.02  | NIL | 380.3   | ON  | 408.13  | ON  | 349.66  |
| 1512 | chrSm | ?_SM602112     | CDS | 1598398 | 1598601 | + | 30 | 30 | ON  | 339.39  | NIL | 300.35  | NIL | 247.08  | NIL | 256.12  | NIL | 296.83  |
| 1513 | chrSm | ?_SM602111     | CDS | 1598843 | 1599196 | + | 30 | 30 | ON  | 425.31  | ON  | 2593.18 | NIL | 1728.17 | ON  | 2455.09 | ON  | 1213.57 |
| 1514 | chrSm | ?_SM602110     | CDS | 1599468 | 1599821 | + | 30 | 30 | ON  | 419.88  | ON  | 521.55  | ON  | 417.74  | ON  | 421.8   | NIL | 328.74  |
| 1515 | chrSm | cIpa_SMC02109  | CDS | 1599831 | 1602347 | + | 30 | 29 | ON  | 492.44  | ON  | 616.12  | ON  | 509.77  | ON  | 530     | NIL | 424.67  |
| 1516 | chrSm | ?_SM602108     | CDS | 1602420 | 1603166 | + | 30 | 30 | ON  | 343.67  | NIL | 301.52  | NIL | 264.58  | NIL | 264.58  | NIL | 283.48  |
| 1517 | chrSm | ?_SM602107     | CDS | 1603167 | 1603507 | + | 30 | 30 | NIL | 292.16  | ON  | 346.8   | NIL | 343.39  | NIL | 279.54  | NIL | 319.56  |
| 1518 | chrSm | ?_SM602106     | CDS | 1603136 | 1604180 | - | 30 | 30 | NIL | 532.86  | ON  | 559.69  | ON  | 463.24  | ON  | 513.51  | ON  | 400.27  |
| 1519 | chrSm | ?_SM602105     | CDS | 1604216 | 1605403 | - | 30 | 30 | ON  | 432.48  | ON  | 473.12  | NIL | 349.27  | ON  | 383.51  | ON  | 412.6   |
| 1520 | chrSm | ?_SM602104     | CDS | 1605408 | 1606133 | - | 30 | 30 | ON  | 487.97  | ON  | 459.8   | NIL | 360.45  | ON  | 448.61  | ON  | 423.02  |
| 1521 | chrSm | ?_SM602103     | CDS | 1606417 | 1606611 | + | 30 | 30 | ON  | 483.2   | ON  | 509.99  | NIL | 345.79  | ON  | 423.02  | NIL | 329.33  |
| 1522 | chrSm | ?_SM602102     | CDS | 1606753 | 1607571 | + | 30 | 30 | ON  | 380.96  | ON  | 410.98  | NIL | 349.56  | ON  | 376.75  | ON  | 350.87  |
| 1523 | chrSm | psbB_SMC02101  | CDS | 1607757 | 1609524 | + | 30 | 30 | ON  | 2806.37 | ON  | 866     | ON  | 497.46  | ON  | 931.99  | ON  | 434.87  |
| 1524 | chrSm | tsf_SMC02100   | CDS | 1608777 | 1609700 | + | 30 | 30 | ON  | 819.55  | ON  | 439.85  | ON  | 452.62  | ON  | 442.37  | ON  | 387.07  |
| 1525 | chrSm | pyrH_SMC02099  | CDS | 1609684 | 1610806 | + | 30 | 30 | ON  | 585.9   | ON  | 343.57  | NIL | 312.47  | ON  | 367.16  | NIL | 353.73  |
| 1526 | chrSm | rfl_SMC02098   | CDS | 1610658 | 1612128 | + | 30 | 30 | ON  | 640.16  | ON  | 470.88  | ON  | 442.79  | ON  | 518.68  | ON  | 469.13  |
| 1527 | chrSm | hpps_SMC02097  | CDS | 1611255 | 1611998 | + | 30 | 30 | ON  | 575.67  | ON  | 548.9   | ON  | 434.28  | ON  | 438.05  | ON  | 399.57  |
| 1528 | chrSm | cdsA_SMC02096  | CDS | 1611988 | 1612831 | + | 30 | 30 | ON  | 548.9   | ON  | 414.21  | NIL | 458.57  | ON  | 413.16  | ON  | 399.66  |
| 1529 | chrSm | ?_SM602095     | CDS | 1612962 | 1614086 | + | 30 | 30 | ON  | 489.82  | ON  | 754.33  | NIL | 384.34  | ON  | 397.35  | ON  | 384.26  |
| 1530 | chrSm | omp_SMC02094   | CDS | 1614335 | 1616665 | + | 30 | 30 | ON  | 961.78  | ON  | 494.39  | ON  | 619.66  | ON  | 694.09  | ON  | 494.25  |
| 1531 | chrSm | fabZ_SMC02093  | CDS | 1616770 | 1617774 | + | 30 | 30 | ON  | 730.66  | ON  | 433.74  | ON  | 485.54  | ON  | 532.19  | NIL | 424.2   |
| 1532 | chrSm | fabZ_SMC02092  | CDS | 1617767 | 1618231 | + | 30 | 30 | ON  | 598.33  | ON  | 410.87  | NIL | 345.61  | ON  | 400.71  | NIL | 345.63  |
| 1533 | chrSm | fabZ_SMC02091  | CDS | 1618234 | 1619946 | + | 30 | 30 | ON  | 444.76  | ON  | 397.87  | NIL | 363.93  | ON  | 414.79  | ON  | 380.93  |
| 1534 | chrSm | ?_SM602090     | CDS | 1619946 | 1619933 | + | 30 | 30 | ON  | 476.21  | ON  | 393.64  | ON  | 456.34  | ON  | 437.74  | ON  | 418.49  |
| 1535 | chrSm | lpxB_SMC02089  | CDS | 1621099 | 1621099 | + | 30 | 30 | ON  | 431.36  | ON  | 348.93  | NIL | 355.47  | ON  | 354.63  | ON  | 316.01  |
| 1536 | chrSm | ?_SM602088     | CDS | 1621299 | 1621583 | - | 30 | 30 | ON  | 398.14  | ON  | 337.45  | NIL | 335.19  | ON  | 329.76  | NIL | 322.69  |
| 1537 | chrSm | glaA_SMC02087  | CDS | 1621221 | 1623410 | - | 30 | 30 | ON  | 1101.08 | ON  | 1422.35 | ON  | 1126.72 | ON  | 1263.28 | ON  | 674.57  |
| 1538 | chrSm | ?_SM602086     | CDS | 1623716 | 1626121 | + | 30 | 30 | ON  | 347.09  | NIL | 300.82  | NIL | 311.9   | NIL | 333.11  | NIL | 324.11  |
| 1539 | chrSm | exdB_SMC02085  | CDS | 1626342 | 1627328 | + | 30 | 30 | ON  | 501.23  | ON  | 938.88  | ON  | 873.57  | ON  | 676.88  | ON  | 466.88  |
| 1540 | chrSm | exdD_SMC02084  | CDS | 1627335 | 1627760 | + | 30 | 28 | NIL | 304.09  | ON  | 450.22  | ON  | 482.72  | ON  | 393.39  | ON  | 378.73  |
| 1541 | chrSm | ?_SM602083     | CDS | 1629395 | 1629395 | + | 30 | 30 | ON  | 509.63  | ON  | 454.07  | ON  | 430.62  | ON  | 419.89  | ON  | 391.27  |
| 1542 | chrSm | tolC_SMC02082  | CDS | 1629672 | 1631042 | + | 30 | 30 | ON  | 696.68  | ON  | 641.06  | ON  | 608.05  | ON  | 659.89  | ON  | 562.19  |
| 1543 | chrSm | ?_SM602081     | CDS | 1631267 | 1632022 | + | 30 | 30 | ON  | 662.33  | ON  | 474.68  | ON  | 402.12  | ON  | 384.67  | NIL | 336.82  |
| 1544 | chrSm | vals_SMC02080  | CDS | 1632336 | 1635179 | + | 30 | 30 | ON  | 668.45  | ON  | 488.13  | ON  | 461.46  | ON  | 468.91  | ON  | 444.19  |
| 1545 | chrSm | ?_SM602079     | CDS | 1635650 | 1636939 | + | 30 | 30 | ON  | 541.24  | ON  | 392.72  | NIL | 374.09  | ON  | 678.69  | ON  | 447.42  |
| 1546 | chrSm | exorA_SMC02078 | CDS | 1637310 | 1638116 | + | 30 | 30 | ON  | 372.8   | ON  | 663.88  | NIL | 358.05  | ON  | 381.9   | NIL | 360.33  |
| 1547 | chrSm | xthA2_SMC02077 | CDS | 1638175 | 1638966 | - | 30 | 30 | ON  | 386.31  | ON  | 390.59  | NIL | 367.54  | ON  | 383.25  | ON  | 401.36  |
| 1548 | chrSm | ckr_SMC02076   | CDS | 1640634 | 1640634 | + | 30 | 30 | ON  | 462.05  | ON  | 464.9   | NIL | 382.87  | ON  | 382.51  | NIL | 324.32  |
| 1549 | chrSm | ?_SM602075     | CDS | 1640660 | 1640989 | - | 30 | 30 | ON  | 455.25  | ON  | 583.92  | ON  | 496.68  | ON  | 505.71  | NIL | 356.43  |
| 1550 | chrSm | ?_SM602074     | CDS | 1641206 | 1642423 | + | 30 | 30 | ON  | 310.89  | ON  | 349.22  | NIL | 299.61  | ON  | 320.2   | NIL | 320.66  |
| 1551 | chrSm | args_SMC02073  | CDS | 1642521 | 1644278 | + | 30 | 30 | ON  | 567.34  | ON  | 401.1   | ON  | 385.61  | ON  | 402.23  | NIL | 366.09  |
| 1552 | chrSm | ?_SM602072     | CDS | 1644342 | 1647179 | + | 30 | 30 | ON  | 621.22  | ON  | 774.5   | ON  | 506.72  | ON  | 891.94  | ON  | 596.42  |
| 1553 | chrSm | ?_SM602071     | CDS | 1648334 | 1648334 | + | 30 | 30 | ON  | 506.52  | ON  | 431.18  | ON  | 434.45  | ON  | 442.34  | ON  | 435.37  |
| 1554 | chrSm | ?_SM602070     | CDS | 1648380 | 1649239 | + | 30 | 30 | ON  | 487.87  | ON  | 489.28  | ON  | 421.23  | ON  | 456.69  | ON  | 445.82  |
| 1555 | chrSm | ?_SM602069     | CDS | 1649958 | 1649958 | + | 30 | 30 | ON  | 436.52  | ON  | 429.96  | ON  | 379.34  | ON  | 380.33  | ON  | 398.53  |
| 1556 | chrSm | ?_SM602068     | CDS | 1650023 | 1651132 | + | 30 | 30 | ON  | 323.96  | ON  | 369     | NIL | 303.77  | NIL | 328.39  | NIL | 282.92  |
| 1557 | chrSm | ?_SM602067     | CDS | 1651227 | 1651433 | + | 30 | 30 | ON  | 660.23  | ON  | 704.29  | ON  | 379.87  | ON  | 617.53  | ON  | 397.47  |
| 1558 | chrSm | talB_SMC02066  | CDS | 1652154 | 1652154 | + | 30 | 30 | ON  | 519.53  | ON  | 459.01  | ON  | 447.13  | ON  | 492.68  | NIL | 369.91  |
| 1559 | chrSm | talC_SMC02065  | CDS | 1653151 | 1652993 | + | 30 | 30 | ON  | 438.07  | ON  | 403.74  | NIL | 341.86  | ON  | 365.96  | NIL | 340.26  |
| 1560 | chrSm | serS_SMC02064  | CDS | 1654330 | 1654443 | + | 30 | 30 | ON  | 556.3   | ON  | 470.31  | ON  | 461.69  | ON  | 456.07  | ON  | 436.33  |
| 1561 | chrSm | sure_SMC02063  | CDS | 1654441 | 1655311 | + | 30 | 30 | ON  | 475.95  | ON  | 363.84  | ON  | 400.47  | ON  | 376.7   | NIL | 327.15  |
| 1562 | chrSm | pcrn_SMC02062  | CDS | 1655861 | 1658861 | + | 30 | 30 | ON  | 477.13  | ON  | 418.08  | NIL | 367.29  | ON  | 362.12  | NIL | 367.22  |
| 1563 | chrSm | bios_SMC02061  | CDS | 1656033 | 1656868 | + | 30 | 30 | ON  | 453.19  | ON  | 395.53  | ON  | 396.45  | ON  | 419.01  | NIL | 323.48  |
| 1564 | chrSm | lppB_SMC02060  | CDS | 1657010 | 1658548 | + | 30 | 30 | ON  | 514.36  | ON  | 635.46  | ON  | 417.04  | ON  | 612.66  | ON  | 417.04  |
| 1565 | chrSm | ?_SM602059     | CDS | 1658563 | 1659282 | - | 30 | 30 | ON  | 423.23  | ON  | 398.13  | ON  | 384.17  | ON  | 399.64  | NIL | 370.43  |
| 1566 | chrSm | ?_SM602058     | CDS | 1659867 | 1660199 | + | 30 | 30 | ON  | 1106.66 | ON  | 624.95  | ON  | 422.85  | ON  | 535.87  | ON  | 426.07  |
| 1567 | chrSm | secD1_SMC02057 | CDS | 1660365 | 1662941 | + | 32 | 32 | ON  | 396.19  | ON  | 369.9   | ON  | 422.34  | ON  | 398.09  | NIL | 362.16  |

|            |                     |      |         |           |    |    |     |         |     |         |     |        |     |         |     |        |
|------------|---------------------|------|---------|-----------|----|----|-----|---------|-----|---------|-----|--------|-----|---------|-----|--------|
| 1568 chrSm | 2. SMC02056         | CDS  | 1662938 | 1663390 + | 30 | 30 | ON  | 378.81  | ON  | 408.79  | NIL | 337.25 | ON  | 382.09  | NIL | 363.24 |
| 1569 chrSm | cttb: SMC02055      | CDS  | 1663352 | 1664190 + | 30 | 30 | ON  | 371.75  | ON  | 335.03  | NIL | 331.49 | ON  | 338.1   | NIL | 348.14 |
| 1570 chrSm | 2. SMC02054         | CDS  | 1664288 | 1664744 + | 30 | 30 | NIL | 293.93  | NIL | 307     | NIL | 363.73 | NIL | 302.91  | NIL | 299.6  |
| 1571 chrSm | 2. SMC02053         | CDS  | 1664774 | 1666192 - | 30 | 30 | ON  | 632.1   | ON  | 450.78  | ON  | 398.59 | ON  | 419.06  | NIL | 392.67 |
| 1572 chrSm | 2. SMC02052         | CDS  | 1666285 | 1666428 - | 30 | 30 | ON  | 378.44  | ON  | 965.37  | NIL | 291.87 | ON  | 402.4   | NIL | 293.45 |
| 1573 chrSm | 2. SMC02051         | CDS  | 1666357 | 1666878 - | 30 | 30 | ON  | 667.36  | ON  | 965.37  | NIL | 367.55 | ON  | 326.07  | ON  | 480.58 |
| 1574 chrSm | IRNALEU-4: SMC02125 | IRNA | 1668345 | 1668441 + | 30 | 30 | ON  | 1620.74 | ON  | 589.02  | ON  | 448.71 | ON  | 509.19  | ON  | 522.78 |
| 1575 chrSm | hg: SMC02050        | CDS  | 1668617 | 1670092 + | 30 | 30 | ON  | 1657.61 | ON  | 780.36  | ON  | 780.49 | ON  | 741.45  | ON  | 662.03 |
| 1576 chrSm | gcpv: SMC02049      | CDS  | 1670379 | 1673243 - | 30 | 30 | ON  | 659.08  | ON  | 592.29  | ON  | 524.19 | ON  | 549.37  | ON  | 477.05 |
| 1577 chrSm | gcvH: SMC02048      | CDS  | 1673243 | 1673605 - | 30 | 30 | ON  | 845.28  | ON  | 696.62  | ON  | 679.35 | ON  | 650.23  | ON  | 583.63 |
| 1578 chrSm | gcvT: SMC02047      | CDS  | 1673622 | 1674761 - | 30 | 30 | ON  | 378.43  | ON  | 447.22  | NIL | 359.33 | ON  | 378.46  | ON  | 381.97 |
| 1579 chrSm | 2. SMC01242         | CDS  | 1675636 | 1676616 + | 30 | 30 | ON  | 470.81  | ON  | 340.58  | NIL | 365.51 | ON  | 289.16  | NIL | 341.43 |
| 1580 chrSm | 2. SMC01241         | CDS  | 1676646 | 1677017 - | 30 | 30 | NIL | 298.1   | ON  | 340.58  | NIL | 289.5  | NIL | 289.5   | NIL | 295.95 |
| 1581 chrSm | TRms-1: SMC01240    | CDS  | 1678066 | 1679262 - | 75 | 0  | ON  | 702.53  | ON  | 740.9   | ON  | 451.55 | ON  | 457.73  | ON  | 399.21 |
| 1582 chrSm | 2. SMC01239         | CDS  | 1679864 | 1680022 - | 30 | 30 | ON  | 355.77  | ON  | 555.78  | ON  | 428.58 | ON  | 516.95  | NIL | 371.5  |
| 1583 chrSm | gnt5: SMC01238      | CDS  | 1680203 | 1680851 + | 30 | 30 | ON  | 349.56  | ON  | 339.06  | NIL | 343.27 | ON  | 356.76  | NIL | 358.51 |
| 1584 chrSm | rrd: SMC01237       | CDS  | 1681005 | 1684796 - | 30 | 30 | ON  | 1903.43 | ON  | 687.71  | ON  | 3536.4 | ON  | 527.75  | NIL | 477.9  |
| 1585 chrSm | 2. SMC01236         | CDS  | 1685692 | 1686495 - | 30 | 30 | ON  | 361.2   | ON  | 351.2   | ON  | 379.87 | ON  | 365.32  | NIL | 344.24 |
| 1586 chrSm | uvrA: SMC01235      | CDS  | 1686585 | 1689506 - | 30 | 30 | ON  | 465.56  | ON  | 403.15  | ON  | 426.89 | ON  | 428.4   | ON  | 405.35 |
| 1587 chrSm | ssb: SMC01233       | CDS  | 1689793 | 1690317 + | 30 | 30 | ON  | 734.26  | ON  | 601.49  | ON  | 558.31 | ON  | 569.71  | ON  | 489.26 |
| 1588 chrSm | 2. SMC01232         | CDS  | 1690383 | 1691012 - | 30 | 30 | ON  | 355.6   | ON  | 481.6   | NIL | 267.75 | NIL | 327.08  | NIL | 291.45 |
| 1589 chrSm | gyrA: SMC01231      | CDS  | 1691298 | 1694093 + | 30 | 30 | ON  | 691.12  | ON  | 468.67  | ON  | 407.54 | ON  | 429.96  | NIL | 365.99 |
| 1590 chrSm | 2. SMC01230         | CDS  | 1694423 | 1695409 - | 30 | 30 | ON  | 346.56  | ON  | 379.85  | NIL | 342.81 | ON  | 375.11  | NIL | 331.15 |
| 1591 chrSm | 2. SMC01229         | CDS  | 1695483 | 1695992 - | 30 | 30 | ON  | 349.64  | ON  | 324.29  | NIL | 373.91 | ON  | 358.48  | NIL | 361.46 |
| 1592 chrSm | 2. SMC01228         | CDS  | 1696164 | 1696958 - | 30 | 30 | NIL | 319.16  | NIL | 307.25  | NIL | 313.6  | NIL | 315.59  | ON  | 349.11 |
| 1593 chrSm | nerA: SMC01227      | CDS  | 1697031 | 1698152 - | 30 | 30 | ON  | 398.47  | ON  | 373.57  | ON  | 442.83 | ON  | 439.95  | ON  | 395.78 |
| 1594 chrSm | 2. SMC01226         | CDS  | 1698201 | 1698491 - | 30 | 30 | ON  | 346.36  | NIL | 315.63  | NIL | 283.71 | ON  | 321.9   | NIL | 284.75 |
| 1595 chrSm | 2. SMC01225         | CDS  | 1699144 | 1700052 - | 30 | 30 | ON  | 455.23  | ON  | 430.82  | NIL | 386.63 | ON  | 462.3   | NIL | 357.86 |
| 1596 chrSm | trxR: SMC01224      | CDS  | 1700159 | 1701133 - | 30 | 30 | ON  | 498.74  | ON  | 415.29  | ON  | 429.67 | ON  | 386.93  | ON  | 407.49 |
| 1597 chrSm | 2. SMC01223         | CDS  | 1701567 | 1702037 + | 30 | 30 | ON  | 414.57  | ON  | 336.91  | NIL | 318.42 | NIL | 331.21  | NIL | 303.76 |
| 1598 chrSm | lpsC: SMC01222      | CDS  | 1702159 | 1702971 + | 30 | 30 | ON  | 381.31  | ON  | 348.5   | NIL | 316.64 | NIL | 316.81  | NIL | 344.55 |
| 1599 chrSm | lpsD: SMC01221      | CDS  | 1702990 | 1704021 + | 30 | 30 | ON  | 317.01  | NIL | 322.89  | NIL | 296.81 | NIL | 306.75  | NIL | 330.2  |
| 1600 chrSm | lpsE: SMC01220      | CDS  | 1704018 | 1705040 + | 30 | 30 | ON  | 352.43  | ON  | 335.61  | NIL | 351.69 | NIL | 319.9   | NIL | 357.98 |
| 1601 chrSm | lpsB: SMC01219      | CDS  | 1705047 | 1706102 - | 30 | 30 | ON  | 476.23  | ON  | 343.31  | ON  | 387.79 | ON  | 387.01  | NIL | 340.72 |
| 1602 chrSm | greA: SMC01218      | CDS  | 1706186 | 1706662 - | 30 | 30 | ON  | 729.23  | ON  | 546.05  | ON  | 427.07 | ON  | 417.29  | ON  | 439.03 |
| 1603 chrSm | 2. SMC01217         | CDS  | 1706955 | 1708424 + | 30 | 30 | ON  | 353.27  | NIL | 384.1   | NIL | 327.93 | NIL | 380.43  | ON  | 297.22 |
| 1604 chrSm | 2. SMC01216         | CDS  | 1708428 | 1708730 - | 30 | 30 | ON  | 394.91  | NIL | 297.13  | NIL | 327.64 | NIL | 315.44  | ON  | 374.02 |
| 1605 chrSm | carb: SMC01215      | CDS  | 1708859 | 1712350 - | 30 | 30 | ON  | 544.06  | ON  | 379.82  | NIL | 330.62 | ON  | 370.44  | NIL | 381.74 |
| 1606 chrSm | 2. SMC01214         | CDS  | 1712553 | 1713596 - | 30 | 30 | ON  | 385.63  | ON  | 403.16  | ON  | 376.55 | ON  | 390.77  | NIL | 339.86 |
| 1607 chrSm | 2. SMC01213         | CDS  | 1713810 | 1714745 + | 30 | 30 | ON  | 403.16  | ON  | 448.14  | ON  | 468.53 | ON  | 404.32  | NIL | 451.48 |
| 1608 chrSm | 2. SMC01212         | CDS  | 1715098 | 1716345 + | 30 | 30 | ON  | 327.27  | NIL | 310.88  | NIL | 304.7  | NIL | 306.94  | NIL | 351.3  |
| 1609 chrSm | 2. SMC01211         | CDS  | 1716793 | 1718196 + | 30 | 30 | NIL | 290.15  | NIL | 321.9   | ON  | 328.49 | NIL | 296.5   | NIL | 308.93 |
| 1610 chrSm | 2. SMC01210         | CDS  | 1718412 | 1718585 - | 30 | 30 | ON  | 324.6   | NIL | 321.9   | ON  | 528.68 | ON  | 441.54  | ON  | 430.94 |
| 1611 chrSm | cooD: SMC01209      | CDS  | 1719314 | 1719805 + | 30 | 30 | ON  | 443.85  | ON  | 405.41  | NIL | 358.25 | ON  | 399.09  | NIL | 343.46 |
| 1612 chrSm | pilB: SMC01208      | CDS  | 1719831 | 1720403 + | 30 | 30 | ON  | 926.29  | ON  | 653.96  | ON  | 404.43 | ON  | 576.06  | ON  | 387.7  |
| 1613 chrSm | queA: SMC01207      | CDS  | 1720429 | 1720938 + | 30 | 30 | ON  | 687.17  | ON  | 709.46  | NIL | 380.21 | ON  | 430.74  | ON  | 415.35 |
| 1614 chrSm | queA: SMC01206      | CDS  | 1721115 | 1722197 + | 30 | 30 | ON  | 402.38  | ON  | 355.99  | NIL | 314.87 | ON  | 378.51  | NIL | 337.3  |
| 1615 chrSm | lgt: SMC01205       | CDS  | 1723198 | 1723328 + | 30 | 30 | ON  | 424.13  | ON  | 378.11  | NIL | 370.2  | NIL | 378.51  | NIL | 315.03 |
| 1616 chrSm | 2. SMC01204         | CDS  | 1723777 | 1724532 + | 30 | 30 | ON  | 322.3   | NIL | 269.02  | ON  | 373.59 | NIL | 317.68  | NIL | 349.59 |
| 1617 chrSm | 2. SMC01203         | CDS  | 1724938 | 1725822 - | 30 | 30 | ON  | 348.23  | ON  | 333.65  | NIL | 367.46 | ON  | 359.61  | NIL | 347.1  |
| 1618 chrSm | 2. SMC01202         | CDS  | 1726614 | 1727201 - | 30 | 30 | ON  | 501.46  | ON  | 478.56  | ON  | 434.94 | ON  | 457.33  | ON  | 416.61 |
| 1619 chrSm | 2. SMC01201         | CDS  | 1727335 | 1727919 - | 30 | 30 | ON  | 1003.7  | ON  | 1193.19 | ON  | 930.33 | ON  | 1279.31 | ON  | 784.64 |
| 1620 chrSm | 2. SMC01200         | CDS  | 1728411 | 1728992 - | 30 | 30 | ON  | 938.41  | ON  | 1217.02 | ON  | 879.79 | ON  | 1008.01 | ON  | 678.69 |
| 1621 chrSm | 2. SMC01698         | CDS  | 1729161 | 1729916 + | 30 | 30 | ON  | 490.01  | ON  | 466.47  | ON  | 433.64 | ON  | 484.82  | ON  | 424.42 |
| 1622 chrSm | 2. SMC02814         | CDS  | 1729913 | 1730845 - | 30 | 30 | ON  | 329.66  | ON  | 342.07  | NIL | 351.81 | ON  | 349.1   | NIL | 347.11 |
| 1623 chrSm | 2. SMC01199         | CDS  | 1731092 | 1731304 - | 30 | 30 | NIL | 249.77  | NIL | 275.6   | NIL | 276.58 | NIL | 266.58  | NIL | 292.41 |
| 1624 chrSm | 2. SMC01198         | CDS  | 1731400 | 1732948 + | 30 | 30 | NIL | 360.96  | ON  | 358.67  | NIL | 378.96 | NIL | 377.9   | NIL | 347.85 |
| 1625 chrSm | 2. SMC01197         | CDS  | 1732976 | 1733218 - | 30 | 30 | NIL | 305.81  | ON  | 383.33  | ON  | 375.33 | ON  | 394.31  | NIL | 392.72 |
| 1626 chrSm | 2. SMC01196         | CDS  | 1733006 | 1734328 + | 30 | 30 | NIL | 292.77  | NIL | 301.34  | NIL | 315.6  | NIL | 305.13  | NIL | 317.83 |
| 1627 chrSm | 2. SMC01195         | CDS  | 1735136 | 1735546 - | 36 | 6  | NIL | 237.86  | NIL | 391.51  | NIL | 250.46 | NIL | 246.1   | NIL | 284.87 |
| 1628 chrSm | 2. SMC01194         | CDS  | 1735940 | 1736776 - | 30 | 30 | ON  | 391.51  | ON  | 365.43  | NIL | 320.48 | NIL | 311.59  | NIL | 331.17 |
| 1629 chrSm | 2. SMC01193         | CDS  | 1736778 | 1737557 - | 30 | 30 | ON  | 463.56  | ON  | 401.9   | ON  | 398.19 | ON  | 416.07  | NIL | 350.17 |
| 1630 chrSm | meis: SMC01192      | CDS  | 1739152 | 1739122 - | 30 | 30 | ON  | 496.96  | ON  | 424.28  | ON  | 456.28 | ON  | 430.16  | ON  | 408.57 |
| 1631 chrSm | 2. SMC01191         | CDS  | 1739452 | 1739663 - | 31 | 31 | NIL | 269.63  | NIL | 260.05  | NIL | 371.56 | NIL | 289.93  | NIL | 273.06 |
| 1632 chrSm | 2. SMC01190         | CDS  | 1739754 | 1740785 - | 30 | 30 | ON  | 474.73  | ON  | 493.8   | NIL | 305    | NIL | 397.39  | NIL | 348.92 |
| 1633 chrSm | tnk: SMC01189       | CDS  | 1740782 | 1741498 - | 30 | 30 | ON  | 467.55  | ON  | 466.45  | ON  | 422.64 | ON  | 394.42  | NIL | 393.94 |
| 1634 chrSm | dec: SMC01188       | CDS  | 1741544 | 1742698 - | 30 | 30 | ON  | 452.68  | ON  | 427.33  | ON  | 427.28 | ON  | 462.12  | NIL | 379.09 |
| 1635 chrSm | rrpA: SMC01187      | CDS  | 1742755 | 1743795 - | 30 | 30 | ON  | 388.83  | ON  | 557.47  | NIL | 360.91 | ON  | 567.26  | NIL | 356.85 |
| 1636 chrSm | 2. SMC01186         | CDS  | 1744522 | 1744782 + | 30 | 30 | ON  | 338.6   | ON  | 318.93  | NIL | 250.91 | NIL | 306.56  | NIL | 305.04 |
| 1637 chrSm | IRNASER-4: SMC01243 | IRNA | 1745036 | 1745125 + | 30 | 30 | NIL | 245.99  | NIL | 250.45  | NIL | 299.23 | NIL | 310.47  | NIL | 316.94 |
| 1638 chrSm | 2. SMC01185         | CDS  | 1745595 | 1747082 + | 30 | 30 | NIL | 267.13  | NIL | 310.47  | NIL | 299.23 | NIL | 308.36  | NIL | 316.94 |
| 1639 chrSm | 2. SMC01184         | CDS  | 1747158 | 1748696 + | 30 | 30 | ON  | 310.33  | NIL | 310.72  | NIL | 311.44 | NIL | 315.22  | NIL | 353.89 |

|            |                     |      |          |           |    |    |     |         |     |         |     |        |     |        |     |        |
|------------|---------------------|------|----------|-----------|----|----|-----|---------|-----|---------|-----|--------|-----|--------|-----|--------|
| 1640 chrSm | IRNALA-5; SMC01244  | IRNA | 1748978  | 1748953 + | 30 | 30 | ON  | 539.06  | ON  | 425.83  | ON  | 790.14 | ON  | 726.5  | ON  | 591.13 |
| 1641 chrSm | lexA; SMC01183      | CDs  | 17489452 | 1750166 + | 30 | 30 | ON  | 376.12  | ON  | 335.65  | ON  | 335.65 | ON  | 457.33 | ON  | 359.52 |
| 1642 chrSm | IRNACXS-1; SMC01251 | IRNA | 1750389  | 1750436 + | 30 | 30 | ON  | 332.72  | NIL | 274.88  | NIL | 234.41 | NIL | 299.04 | NIL | 273.2  |
| 1643 chrSm | ?; SMC01182         | CDs  | 1750507  | 1751586 - | 30 | 30 | ON  | 342.73  | NIL | 294.96  | ON  | 381.23 | ON  | 361.06 | NIL | 357.86 |
| 1644 chrSm | ?; SMC01181         | CDs  | 1751987  | 1752334 + | 30 | 30 | ON  | 321.47  | ON  | 362.85  | NIL | 273.16 | NIL | 334.01 | NIL | 371.99 |
| 1645 chrSm | IRNAC01180          | CDs  | 1752382  | 1752675 - | 30 | 30 | NIL | 280.04  | NIL | 277.13  | NIL | 288.1  | NIL | 269.42 | NIL | 322.85 |
| 1646 chrSm | IRNAA5N-1; SMC01245 | IRNA | 1752818  | 1752879 + | 30 | 30 | NIL | 262.42  | NIL | 263.23  | NIL | 340.1  | NIL | 313.23 | NIL | 316.88 |
| 1647 chrSm | ?; SMC01178         | CDs  | 1752970  | 1753314 + | 30 | 30 | ON  | 371.78  | NIL | 295.12  | NIL | 366.73 | NIL | 324.43 | NIL | 337.25 |
| 1648 chrSm | ?; SMC01177         | CDs  | 1753311  | 1753637 + | 30 | 30 | ON  | 334.84  | NIL | 292.28  | NIL | 336.73 | NIL | 287.86 | NIL | 320.28 |
| 1649 chrSm | ?; SMC01176         | CDs  | 1753412  | 1754112 - | 30 | 30 | ON  | 393.7   | ON  | 419.08  | ON  | 379.3  | ON  | 376.18 | NIL | 345.2  |
| 1650 chrSm | ?; SMC01175         | CDs  | 1754109  | 1754348 - | 30 | 30 | ON  | 510.5   | ON  | 594.89  | ON  | 409.84 | ON  | 633.5  | ON  | 464.92 |
| 1651 chrSm | CSYK2; SMC01174     | CDs  | 1754542  | 1755390 - | 31 | 29 | ON  | 326.11  | NIL | 309.13  | NIL | 327.17 | ON  | 317.92 | NIL | 370.29 |
| 1652 chrSm | ?; SMC01173         | CDs  | 1755660  | 1756745 + | 30 | 30 | ON  | 434.48  | ON  | 428.96  | ON  | 423.76 | ON  | 437.4  | NIL | 404.89 |
| 1653 chrSm | sepa; SMC01172      | CDs  | 1756753  | 1757502 + | 30 | 30 | ON  | 405.11  | ON  | 368.16  | ON  | 412.41 | ON  | 418.57 | ON  | 464.76 |
| 1654 chrSm | ?; SMC01171         | CDs  | 17567700 | 1758563 + | 30 | 30 | ON  | 366.61  | ON  | 471.87  | ON  | 471.8  | ON  | 457.69 | ON  | 444.76 |
| 1655 chrSm | ?; SMC01170         | CDs  | 1758569  | 1759132 + | 30 | 30 | NIL | 339.59  | ON  | 388.43  | NIL | 299.89 | NIL | 345.86 | NIL | 332.51 |
| 1656 chrSm | 8d1; SMC01169       | CDs  | 1759234  | 1759701 + | 30 | 30 | NIL | 265.87  | NIL | 294.92  | NIL | 275.47 | NIL | 271.25 | NIL | 307.3  |
| 1657 chrSm | ?; SMC01168         | CDs  | 1759743  | 1760861 + | 30 | 30 | ON  | 332.27  | NIL | 303.89  | NIL | 306.93 | NIL | 303.26 | NIL | 304.03 |
| 1658 chrSm | cpdB; SMC04449      | CDs  | 1761019  | 1761480 + | 30 | 30 | NIL | 302.02  | NIL | 312.62  | NIL | 289.07 | NIL | 291.67 | NIL | 307.63 |
| 1659 chrSm | ?; SMC00944         | CDs  | 1761609  | 1763582 + | 30 | 30 | ON  | 396.99  | ON  | 457.91  | NIL | 335.12 | ON  | 356.22 | NIL | 343.4  |
| 1660 chrSm | ?; SMC00935         | CDs  | 1763892  | 1764212 - | 30 | 30 | ON  | 399.56  | ON  | 324.65  | NIL | 331.65 | ON  | 346.59 | NIL | 333.48 |
| 1661 chrSm | IlVA; SMC00936      | CDs  | 1764290  | 1765537 - | 30 | 30 | NIL | 285.99  | NIL | 287.53  | NIL | 312.35 | NIL | 303.33 | NIL | 307.72 |
| 1662 chrSm | IRKH; SMC00937      | CDs  | 1765694  | 1767148 + | 30 | 30 | NIL | 367.14  | ON  | 334.05  | ON  | 282.9  | NIL | 305.74 | NIL | 308.54 |
| 1663 chrSm | ?; SMC00938         | CDs  | 1767233  | 1767823 + | 30 | 30 | NIL | 305.67  | ON  | 334.05  | ON  | 404.3  | ON  | 403.37 | NIL | 404.3  |
| 1664 chrSm | IRNALEU-5; SMC00957 | IRNA | 1767233  | 1767928 + | 30 | 30 | ON  | 531.93  | ON  | 527.05  | ON  | 401.46 | ON  | 418.18 | NIL | 366.93 |
| 1665 chrSm | ?; SMC00939         | CDs  | 1767846  | 1768385 - | 30 | 30 | ON  | 396.83  | ON  | 444.51  | ON  | 616.61 | ON  | 527.68 | NIL | 455.94 |
| 1666 chrSm | ?; SMC00940         | CDs  | 1768591  | 1768842 - | 30 | 30 | NIL | 266.4   | NIL | 253.24  | NIL | 279.68 | NIL | 277.2  | NIL | 292.32 |
| 1667 chrSm | ?; SMC00941         | CDs  | 1769534  | 1769552 + | 30 | 30 | NIL | 306.15  | ON  | 371.94  | ON  | 403.77 | ON  | 403.99 | NIL | 364.77 |
| 1668 chrSm | ?; SMC00942         | CDs  | 1769641  | 1769883 - | 31 | 29 | NIL | 315.02  | ON  | 384.81  | NIL | 339.43 | ON  | 419.36 | NIL | 347.23 |
| 1669 chrSm | WDA1; SMC00943      | CDs  | 1770238  | 1770837 + | 30 | 30 | ON  | 452     | ON  | 570.18  | ON  | 389.07 | ON  | 452.66 | NIL | 402.99 |
| 1670 chrSm | ?; SMC00944         | CDs  | 1770999  | 1771760 + | 30 | 30 | ON  | 396.24  | ON  | 379.44  | NIL | 342.84 | NIL | 310.17 | NIL | 325.7  |
| 1671 chrSm | gpl1; SMC00945      | CDs  | 1771930  | 1772427 + | 30 | 30 | ON  | 335.15  | NIL | 307.08  | NIL | 274.51 | NIL | 277.89 | NIL | 279.71 |
| 1672 chrSm | ?; SMC00946         | CDs  | 1772508  | 1773992 - | 30 | 30 | ON  | 378.89  | ON  | 379.31  | NIL | 349.05 | ON  | 392.61 | ON  | 386.58 |
| 1673 chrSm | glnB; SMC00947      | CDs  | 1774339  | 1774677 + | 30 | 30 | ON  | 873.28  | ON  | 1103.59 | ON  | 535.23 | ON  | 560.14 | ON  | 453.42 |
| 1674 chrSm | glnA; SMC00948      | CDs  | 1774760  | 1776169 + | 30 | 30 | ON  | 690.02  | ON  | 620.08  | ON  | 502.4  | ON  | 486.74 | ON  | 382.86 |
| 1675 chrSm | ?; SMC00949         | CDs  | 1776357  | 1776680 + | 30 | 30 | ON  | 453.56  | ON  | 438.07  | ON  | 374.02 | ON  | 414.04 | ON  | 393.07 |
| 1676 chrSm | ?; SMC00950         | CDs  | 1776831  | 1777466 - | 30 | 30 | ON  | 1080.57 | ON  | 618.82  | ON  | 477.02 | ON  | 615.03 | ON  | 525.09 |
| 1677 chrSm | ?; SMC00951         | CDs  | 1777786  | 1779600 + | 30 | 30 | ON  | 502.89  | ON  | 401.56  | NIL | 353.84 | ON  | 400.55 | NIL | 364.85 |
| 1678 chrSm | ?; SMC00952         | CDs  | 1779683  | 1780348 + | 30 | 30 | ON  | 376.5   | ON  | 371.04  | NIL | 308.4  | NIL | 329.14 | NIL | 295.03 |
| 1679 chrSm | ?; SMC00953         | CDs  | 1780393  | 1781368 + | 30 | 30 | NIL | 278.83  | NIL | 296.27  | NIL | 355.15 | NIL | 324.76 | NIL | 329.76 |
| 1680 chrSm | ?; SMC00954         | CDs  | 1781888  | 1784107 + | 30 | 30 | NIL | 288.27  | ON  | 349.13  | NIL | 348.21 | ON  | 405.2  | NIL | 337.27 |
| 1681 chrSm | ?; SMC00955         | CDs  | 1784287  | 1785462 + | 30 | 30 | ON  | 312.2   | ON  | 349.13  | NIL | 348.21 | ON  | 347.21 | NIL | 361.76 |
| 1682 chrSm | ?; SMC00956         | CDs  | 1785948  | 1786122 + | 30 | 30 | ON  | 355.06  | ON  | 401.91  | ON  | 389.92 | ON  | 386.17 | ON  | 391.19 |
| 1683 chrSm | xHAI1; SMC00956     | CDs  | 1786128  | 1786924 + | 33 | 33 | ON  | 318.55  | ON  | 333.75  | ON  | 425.41 | ON  | 383.84 | NIL | 394.72 |
| 1684 chrSm | ?; SMC00958         | CDs  | 1786919  | 1787137 + | 30 | 30 | NIL | 277.98  | NIL | 301.82  | NIL | 343.73 | ON  | 352.1  | NIL | 308.77 |
| 1685 chrSm | mtd; SMC04450       | CDs  | 1787537  | 1791052 - | 30 | 30 | ON  | 364.44  | ON  | 331.41  | NIL | 408.03 | ON  | 391.34 | NIL | 403.05 |
| 1686 chrSm | ?; SMC00227         | CDs  | 1791055  | 1791360 - | 30 | 30 | ON  | 414.31  | ON  | 335.54  | NIL | 272.6  | NIL | 283.44 | NIL | 317.19 |
| 1687 chrSm | recG; SMC00228      | CDs  | 1791477  | 1793382 + | 30 | 30 | ON  | 352.88  | NIL | 331.41  | NIL | 334.09 | ON  | 338.88 | NIL | 324.78 |
| 1688 chrSm | ?; SMC00229         | CDs  | 1793597  | 1794289 - | 30 | 30 | ON  | 466.14  | ON  | 573.32  | NIL | 371.61 | ON  | 432.55 | NIL | 389.03 |
| 1689 chrSm | ?; SMC00230         | CDs  | 1794308  | 1794805 - | 30 | 30 | ON  | 520.19  | ON  | 514.13  | NIL | 388.99 | ON  | 426.38 | NIL | 360.72 |
| 1690 chrSm | glnU; SMC00231      | CDs  | 1794802  | 1796628 - | 33 | 5  | ON  | 473.09  | ON  | 515.58  | ON  | 521.98 | ON  | 439.6  | ON  | 390.16 |
| 1691 chrSm | ?; SMC00232         | CDs  | 1796872  | 1798242 - | 30 | 30 | ON  | 531.72  | ON  | 415.13  | NIL | 360.51 | ON  | 552.77 | ON  | 523.51 |
| 1692 chrSm | ?; SMC00233         | CDs  | 1798397  | 1800044 - | 30 | 30 | ON  | 355.21  | ON  | 349.21  | NIL | 341.87 | ON  | 371.2  | NIL | 341.87 |
| 1693 chrSm | ppd; SMC00234       | CDs  | 1800399  | 1802289 + | 30 | 30 | ON  | 482.12  | ON  | 448.36  | ON  | 453.75 | ON  | 465.54 | ON  | 399.66 |
| 1694 chrSm | trpD; SMC00235      | CDs  | 1802308  | 1803321 + | 30 | 30 | ON  | 463.35  | ON  | 449.93  | ON  | 426.94 | ON  | 395.02 | ON  | 393.2  |
| 1695 chrSm | trpC; SMC00236      | CDs  | 1803331  | 1804146 + | 30 | 30 | ON  | 400.53  | ON  | 378.02  | ON  | 376.64 | ON  | 378.02 | NIL | 334.27 |
| 1696 chrSm | moeA; SMC00237      | CDs  | 1804146  | 1804640 + | 30 | 30 | ON  | 378.52  | ON  | 371.79  | NIL | 283.25 | NIL | 318.02 | NIL | 336.19 |
| 1697 chrSm | moeA; SMC00238      | CDs  | 1805460  | 1805860 + | 30 | 30 | ON  | 397.9   | ON  | 404.32  | ON  | 378.72 | NIL | 425.73 | NIL | 362.04 |
| 1698 chrSm | ?; SMC00239         | CDs  | 1805919  | 1806425 - | 30 | 30 | NIL | 266.45  | NIL | 278.11  | ON  | 396.42 | ON  | 295.9  | NIL | 302.38 |
| 1699 chrSm | ?; SMC00240         | CDs  | 1806636  | 1807928 - | 30 | 30 | ON  | 482.34  | ON  | 400.45  | ON  | 467.31 | ON  | 468.07 | ON  | 461.81 |
| 1700 chrSm | ?; SMC00241         | CDs  | 1808061  | 1808780 - | 30 | 30 | ON  | 392.91  | ON  | 392.74  | ON  | 344.74 | ON  | 364.63 | ON  | 371.59 |
| 1701 chrSm | ?; SMC00242         | CDs  | 1808983  | 1810053 - | 30 | 30 | ON  | 597.14  | ON  | 457.93  | ON  | 459.13 | ON  | 563.79 | NIL | 316.11 |
| 1702 chrSm | ?; SMC00244         | CDs  | 1810100  | 1811020 - | 30 | 30 | ON  | 380.82  | ON  | 342.2   | NIL | 294.69 | ON  | 346.42 | NIL | 316.11 |
| 1703 chrSm | ?; SMC00243         | CDs  | 1811020  | 1812114 - | 30 | 30 | ON  | 371.06  | ON  | 359.19  | NIL | 299.85 | ON  | 367.8  | NIL | 296.66 |
| 1704 chrSm | ?; SMC00245         | CDs  | 1812104  | 1813690 + | 30 | 30 | ON  | 520.53  | ON  | 411.73  | ON  | 429.05 | ON  | 429.05 | NIL | 390.66 |
| 1705 chrSm | gpr; SMC00246       | CDs  | 1813837  | 1814814 - | 30 | 30 | ON  | 622.62  | ON  | 649.7   | ON  | 514.9  | ON  | 476.31 | NIL | 599.12 |
| 1706 chrSm | pks; SMC00247       | CDs  | 1814867  | 1815592 - | 30 | 30 | ON  | 365.57  | ON  | 345.07  | NIL | 305.17 | NIL | 318.54 | NIL | 294.22 |
| 1707 chrSm | ?; SMC00316         | CDs  | 1815870  | 1817147 + | 30 | 30 | ON  | 496.91  | ON  | 491.48  | ON  | 428.27 | ON  | 486.3  | ON  | 419.84 |
| 1708 chrSm | ?; SMC00317         | CDs  | 1817115  | 1818077 - | 30 | 30 | ON  | 332.38  | NIL | 300.37  | NIL | 307.35 | NIL | 301.78 | NIL | 320.05 |
| 1709 chrSm | cscA; SMC00248      | CDs  | 1818217  | 1818960 - | 30 | 30 | ON  | 333.95  | ON  | 371.24  | NIL | 308.79 | NIL | 305.48 | NIL | 321.86 |
| 1710 chrSm | IRNALYS-2; SMC00303 | IRNA | 1819518  | 1819593 + | 30 | 30 | NIL | 298.87  | NIL | 261.67  | NIL | 246.93 | NIL | 257.76 | NIL | 264.77 |
| 1711 chrSm | ?; SMC00249         | CDs  | 1819746  | 1820051 + | 33 | 28 | ON  | 422.91  | ON  | 510.3   | ON  | 464.33 | ON  | 379.96 | ON  | 440.9  |

|            |                     |      |           |           |    |    |     |         |     |         |     |        |     |         |     |        |
|------------|---------------------|------|-----------|-----------|----|----|-----|---------|-----|---------|-----|--------|-----|---------|-----|--------|
| 1712 chrSm | ?_SMC00250          | CDS  | 1820609   | 1820773 + | 30 | 30 | NIL | 290.45  | NIL | 291.4   | NIL | 302.9  | NIL | 310.69  | NIL | 323.13 |
| 1713 chrSm | ?_SMC00251          | CDS  | 1820813   | 1821076 + | 30 | 30 | NIL | 294.86  | NIL | 309.99  | NIL | 246.19 | NIL | 273.41  | NIL | 279.39 |
| 1714 chrSm | ?_SMC00252          | CDS  | 1821862   | 1821461 - | 30 | 30 | NIL | 263.7   | NIL | 305.23  | NIL | 270.55 | NIL | 277.83  | NIL | 277.83 |
| 1715 chrSm | ?_SMC00253          | CDS  | 1822399   | 1822800 + | 30 | 30 | NIL | 284.66  | NIL | 293.84  | NIL | 311.93 | NIL | 290.65  | NIL | 332.67 |
| 1716 chrSm | ?_SMC00254          | CDS  | 1823706   | 1824173 + | 30 | 30 | NIL | 290.23  | NIL | 286.84  | NIL | 311.79 | NIL | 317.54  | NIL | 291.85 |
| 1717 chrSm | ?_SMC00437          | CDS  | 1824461   | 1824461 + | 36 | 36 | NIL | 359.53  | ON  | 385.87  | NIL | 255.31 | ON  | 356.2   | NIL | 345.7  |
| 1718 chrSm | ?_SMC00255          | CDS  | 1824443   | 1824748 + | 30 | 30 | NIL | 289.22  | NIL | 311.6   | NIL | 253.8  | NIL | 264.73  | NIL | 262.71 |
| 1719 chrSm | ?_SMC00256          | CDS  | 1824818   | 1825825 + | 30 | 30 | NIL | 340.28  | NIL | 319.37  | NIL | 304.57 | NIL | 313.06  | NIL | 304.57 |
| 1720 chrSm | repB2;_SMC00257     | CDS  | 1826087   | 1826734 + | 30 | 30 | NIL | 316.01  | ON  | 406.91  | NIL | 369.19 | NIL | 343.61  | NIL | 357.07 |
| 1721 chrSm | ?_SMC00258          | CDS  | 1826892   | 1827155 + | 30 | 30 | NIL | 270.12  | ON  | 338.75  | NIL | 331.56 | NIL | 340.7   | NIL | 373.51 |
| 1722 chrSm | ?_SMC00259          | CDS  | 1827172   | 1827948 - | 30 | 30 | NIL | 336.69  | ON  | 326.9   | NIL | 321.22 | NIL | 321.38  | NIL | 292.92 |
| 1723 chrSm | ?_SMC00260          | CDS  | 1828026   | 1828790 - | 31 | 31 | ON  | 327.99  | NIL | 322.76  | NIL | 340.37 | NIL | 343.33  | NIL | 339.59 |
| 1724 chrSm | ?_SMC00261          | CDS  | 1828787   | 1830436 - | 31 | 31 | ON  | 316.11  | NIL | 316.6   | NIL | 351.95 | ON  | 370.8   | NIL | 330.3  |
| 1725 chrSm | ?_SMC00262          | CDS  | 1830433   | 1831602 - | 31 | 31 | ON  | 356.96  | ON  | 368.35  | NIL | 300.24 | ON  | 403.29  | NIL | 319.2  |
| 1726 chrSm | ?_SMC00263          | CDS  | 1831599   | 1832407 - | 30 | 30 | ON  | 396.38  | ON  | 376.77  | NIL | 369.96 | ON  | 350.81  | NIL | 324.64 |
| 1727 chrSm | ?_SMC00264          | CDS  | 1832451   | 1832254 - | 30 | 30 | ON  | 367.64  | ON  | 384.98  | NIL | 352.44 | ON  | 382.92  | NIL | 348.46 |
| 1728 chrSm | ?_SMC00265          | CDS  | 1833357   | 1834367 - | 30 | 30 | ON  | 463.77  | ON  | 609.32  | NIL | 365.51 | ON  | 525.88  | NIL | 348.42 |
| 1729 chrSm | ?_SMC00266          | CDS  | 1834415   | 1836283 - | 30 | 30 | NIL | 305.83  | ON  | 366.92  | NIL | 305.63 | NIL | 321.84  | NIL | 341.3  |
| 1730 chrSm | ?_SMC00267          | CDS  | 1836573   | 1837397 - | 30 | 30 | ON  | 351.2   | ON  | 362.92  | ON  | 426.96 | ON  | 381.83  | NIL | 320.96 |
| 1731 chrSm | ?_SMC00268          | CDS  | 1837446   | 1838204 - | 30 | 30 | ON  | 330.33  | ON  | 362.53  | ON  | 385.4  | ON  | 358.99  | NIL | 388.72 |
| 1732 chrSm | ?_SMC00269          | CDS  | 1838279   | 1839325 - | 30 | 30 | NIL | 318.24  | ON  | 330.36  | NIL | 301.92 | NIL | 319.33  | NIL | 309    |
| 1733 chrSm | ?_SMC00270          | CDS  | 1839338   | 1840192 - | 30 | 30 | NIL | 329.12  | NIL | 322.58  | ON  | 413.96 | ON  | 354.57  | NIL | 373.37 |
| 1734 chrSm | ?_SMC00271          | CDS  | 1840498   | 1841475 + | 30 | 30 | ON  | 330.76  | ON  | 344.84  | NIL | 342.05 | ON  | 415.44  | NIL | 302.84 |
| 1735 chrSm | ?_SMC00272          | CDS  | 1841475   | 1842041 + | 30 | 30 | ON  | 337.53  | ON  | 360.05  | ON  | 396.9  | ON  | 379.24  | NIL | 372.17 |
| 1736 chrSm | ?_SMC00273          | CDS  | 1842038   | 1843297 + | 30 | 30 | ON  | 353.4   | ON  | 360.57  | NIL | 352.8  | ON  | 361.17  | NIL | 325.83 |
| 1737 chrSm | ?_SMC00274          | CDS  | 1843307   | 1844194 + | 30 | 30 | ON  | 321.58  | ON  | 363.72  | NIL | 373.92 | ON  | 381.87  | NIL | 328.16 |
| 1738 chrSm | ?_SMC00275          | CDS  | 1844280   | 1845254 + | 30 | 30 | ON  | 356.59  | NIL | 318.14  | NIL | 295.8  | NIL | 356.48  | NIL | 343.09 |
| 1739 chrSm | ?_SMC00276          | CDS  | 1845673   | 1846548 - | 31 | 31 | ON  | 337.1   | ON  | 350.2   | NIL | 340.42 | ON  | 352.5   | NIL | 287.18 |
| 1740 chrSm | ?_SMC00277          | CDS  | 1846535   | 1848034 - | 30 | 30 | NIL | 258.62  | ON  | 328.06  | NIL | 275.37 | NIL | 297.46  | NIL | 319.02 |
| 1741 chrSm | ?_SMC00278          | CDS  | 1848133   | 1848615 + | 30 | 30 | NIL | 274.86  | NIL | 310.68  | NIL | 302.39 | NIL | 289.51  | NIL | 384.62 |
| 1742 chrSm | ?_SMC00279          | CDS  | 1848798   | 1849964 + | 30 | 30 | ON  | 319.94  | NIL | 313.4   | NIL | 302.39 | NIL | 297.12  | NIL | 297.12 |
| 1743 chrSm | ?_SMC00280          | CDS  | 1850238   | 1850344 + | 30 | 30 | NIL | 236.61  | NIL | 274.02  | NIL | 259.19 | NIL | 258.52  | NIL | 300.18 |
| 1744 chrSm | ?_SMC00281          | CDS  | 1850367   | 1851307 - | 30 | 30 | NIL | 336.9   | NIL | 293.4   | NIL | 371.62 | NIL | 325.31  | NIL | 357.85 |
| 1745 chrSm | ?_SMC00282          | CDS  | 1851616   | 1852281 - | 30 | 30 | NIL | 291.95  | NIL | 264.4   | NIL | 319.59 | NIL | 313.34  | NIL | 304.32 |
| 1746 chrSm | ?_SMC00283          | CDS  | 1852378 + | 1853278 + | 30 | 30 | ON  | 357.36  | NIL | 302.53  | NIL | 346.34 | NIL | 332.94  | NIL | 357.74 |
| 1747 chrSm | ?_SMC00284          | CDS  | 1853311   | 1853481 + | 30 | 30 | ON  | 337.48  | NIL | 314.69  | ON  | 394.05 | ON  | 407.64  | NIL | 365.92 |
| 1748 chrSm | TrnS-2;_SMC00285    | CDS  | 1854027   | 1855223 + | 76 | 0  | NIL | 702.25  | NIL | 724.94  | ON  | 452.48 | ON  | 518.12  | ON  | 402.99 |
| 1749 chrSm | ?_SMC00286          | CDS  | 1855870   | 1856193 + | 30 | 30 | NIL | 243.69  | NIL | 241.55  | NIL | 441.36 | NIL | 269.2   | NIL | 325.67 |
| 1750 chrSm | ?_SMC00287          | CDS  | 1856500   | 1857591 + | 49 | 10 | NIL | 333.24  | ON  | 313.86  | ON  | 421.26 | NIL | 243.35  | NIL | 277.06 |
| 1751 chrSm | IRNAARG-3;_SMC00308 | IRNA | 1857920   | 1858319 - | 30 | 30 | NIL | 243.96  | NIL | 225.01  | NIL | 427.26 | ON  | 429.85  | NIL | 375.88 |
| 1752 chrSm | IRNAARG-1;_SMC00307 | IRNA | 1858372   | 1858448 - | 32 | 29 | ON  | 796.67  | ON  | 499.54  | ON  | 388.56 | ON  | 572.91  | NIL | 441.3  |
| 1753 chrSm | ?_SMC00288          | CDS  | 1858329   | 1859020 - | 30 | 30 | ON  | 357.04  | NIL | 322.83  | ON  | 434.43 | NIL | 319.59  | NIL | 337.47 |
| 1754 chrSm | ?_SMC00289          | CDS  | 1859020   | 1859596 - | 30 | 30 | ON  | 507.56  | ON  | 424.82  | ON  | 395.24 | ON  | 388.64  | NIL | 341.28 |
| 1755 chrSm | gloA;_SMC00290      | CDS  | 1859795   | 1860235 + | 30 | 30 | ON  | 357.02  | ON  | 488.2   | NIL | 315.36 | ON  | 349.03  | NIL | 364.53 |
| 1756 chrSm | ?_SMC00291          | CDS  | 1860627   | 1861946 + | 30 | 30 | ON  | 440.48  | ON  | 441.77  | ON  | 407.4  | ON  | 435.71  | NIL | 360.53 |
| 1757 chrSm | IRNAGLU-1;_SMC00304 | IRNA | 1862108   | 1862183 + | 30 | 0  | ON  | 478.71  | ON  | 419.19  | NIL | 401.57 | ON  | 437.05  | ON  | 414.8  |
| 1758 chrSm | IRNAGLU-2;_SMC00305 | IRNA | 1862334   | 1862608 + | 30 | 30 | ON  | 388.75  | ON  | 371.2   | ON  | 434.29 | ON  | 447.98  | ON  | 446.1  |
| 1759 chrSm | IRNAGLU-3;_SMC00306 | IRNA | 1862790   | 1862865 + | 30 | 0  | ON  | 478.71  | ON  | 419.19  | NIL | 401.57 | ON  | 437.05  | NIL | 414.8  |
| 1760 chrSm | recJ;_SMC00292      | CDS  | 1862939   | 1864741 - | 30 | 30 | ON  | 348.49  | ON  | 328.58  | NIL | 405.69 | ON  | 441.85  | ON  | 414.8  |
| 1761 chrSm | ?_SMC00293          | CDS  | 1864871   | 1864871 - | 30 | 30 | ON  | 553.18  | ON  | 504.38  | NIL | 371.26 | ON  | 471.34  | ON  | 435.33 |
| 1762 chrSm | ?_SMC00294          | CDS  | 1866474   | 1867491 - | 30 | 30 | ON  | 527.42  | ON  | 478.83  | NIL | 345.76 | ON  | 342.71  | NIL | 416.96 |
| 1763 chrSm | ?_SMC00295          | CDS  | 1867921   | 1867921 - | 30 | 30 | ON  | 460.25  | ON  | 428.92  | NIL | 336.73 | ON  | 380.29  | NIL | 326.85 |
| 1764 chrSm | phbC;_SMC00296      | CDS  | 1868133   | 1869968 + | 30 | 30 | ON  | 379.15  | ON  | 428.92  | NIL | 345.73 | ON  | 358.73  | NIL | 380.29 |
| 1765 chrSm | sfsA;_SMC00297      | CDS  | 1870002   | 1870721 + | 30 | 30 | NIL | 299.17  | NIL | 299.46  | NIL | 335.18 | NIL | 338.36  | NIL | 320.04 |
| 1766 chrSm | mapI;_SMC00298      | CDS  | 1870750   | 1871589 + | 30 | 30 | ON  | 425.94  | ON  | 450.56  | ON  | 392.69 | ON  | 430.52  | ON  | 387.83 |
| 1767 chrSm | radC;_SMC00299      | CDS  | 1871586   | 1872374 + | 30 | 30 | ON  | 399.87  | NIL | 312.19  | NIL | 299.91 | NIL | 429.91  | NIL | 318.15 |
| 1768 chrSm | ?_SMC00300          | CDS  | 1872516   | 1873919 + | 30 | 30 | ON  | 398.07  | ON  | 407.38  | NIL | 321.89 | NIL | 377.3   | NIL | 321.89 |
| 1769 chrSm | ?_SMC00301          | CDS  | 1874133   | 1874525 - | 30 | 30 | ON  | 621.2   | ON  | 1097.62 | ON  | 625.41 | ON  | 649.68  | ON  | 438.17 |
| 1770 chrSm | ?_SMC00302          | CDS  | 1875001   | 1875001 - | 30 | 30 | ON  | 707.3   | ON  | 774.11  | ON  | 520.31 | ON  | 680.93  | ON  | 570.02 |
| 1771 chrSm | ?_SMC00303          | CDS  | 1875012   | 1876256 - | 30 | 30 | ON  | 483.3   | ON  | 539.87  | ON  | 499.47 | ON  | 481.56  | ON  | 425.78 |
| 1772 chrSm | ?_SMC00304          | CDS  | 1876269   | 1877546 - | 30 | 30 | ON  | 539.87  | ON  | 572.72  | ON  | 404.1  | ON  | 580.03  | ON  | 461.2  |
| 1773 chrSm | ?_SMC00305          | CDS  | 1877569   | 1878324 - | 30 | 30 | ON  | 1026.05 | ON  | 1469.17 | ON  | 776.82 | ON  | 1102.56 | ON  | 811.72 |
| 1774 chrSm | ?_SMC00306          | CDS  | 1878026   | 1879871 - | 30 | 30 | ON  | 533.17  | ON  | 604.82  | ON  | 553.29 | ON  | 592.03  | ON  | 457.17 |
| 1775 chrSm | phfS;_SMC00529      | CDS  | 1880026   | 1881192 - | 30 | 30 | ON  | 347.9   | ON  | 505.8   | ON  | 387.46 | ON  | 515.39  | ON  | 408.24 |
| 1776 chrSm | ?_SMC00528          | CDS  | 1882088   | 1882088 + | 30 | 30 | ON  | 706.95  | ON  | 486.16  | ON  | 394.46 | ON  | 531.31  | ON  | 442.12 |
| 1777 chrSm | ?_SMC00527          | CDS  | 1883476   | 1883627 + | 30 | 30 | ON  | 370.01  | ON  | 408.25  | NIL | 356.65 | ON  | 368.46  | NIL | 338.91 |
| 1778 chrSm | lyrS;_SMC00526      | CDS  | 1883772   | 1885025 + | 30 | 30 | ON  | 479.06  | ON  | 372.61  | NIL | 377.42 | ON  | 378.18  | NIL | 359.3  |
| 1779 chrSm | ?_SMC00525          | CDS  | 1885074   | 1888490 - | 30 | 30 | ON  | 346.31  | ON  | 342.96  | NIL | 370.71 | NIL | 336.79  | NIL | 342.59 |
| 1780 chrSm | bcp;_SMC00524       | CDS  | 1888877   | 1889344 + | 30 | 30 | ON  | 419.23  | ON  | 488.94  | ON  | 431.8  | ON  | 501.75  | ON  | 435.08 |
| 1781 chrSm | ?_SMC00523          | CDS  | 1889362   | 1889880 + | 30 | 30 | ON  | 394.62  | ON  | 353.34  | ON  | 375.91 | ON  | 359.17  | NIL | 357.69 |
| 1782 chrSm | ?_SMC00540          | CDS  | 1889904   | 1890188 + | 30 | 30 | ON  | 359.4   | ON  | 383.67  | NIL | 306.87 | ON  | 360.69  | NIL | 318.41 |

|      |       |      |          |     |         |         |   |    |    |     |         |     |         |     |        |     |         |     |        |
|------|-------|------|----------|-----|---------|---------|---|----|----|-----|---------|-----|---------|-----|--------|-----|---------|-----|--------|
| 1784 | ch:Sm | ?    | SMC00539 | CDS | 1890396 | 1891637 | + | 30 | 30 | ON  | 508.81  | ON  | 450.86  | ON  | 525.13 | ON  | 512.3   | ON  | 434.87 |
| 1785 | ch:Sm | rhE1 | SMC00522 | CDS | 1891837 | 1893336 | + | 30 | 30 | ON  | 508.74  | ON  | 405.92  | ON  | 382.83 | ON  | 463.54  | ON  | 430.1  |
| 1786 | ch:Sm | ?    | SMC00521 | CDS | 1893346 | 1893345 | + | 30 | 30 | CDS | 678.65  | NIL | 478.36  | NIL | 317.19 | ON  | 384.01  | NIL | 338.94 |
| 1787 | ch:Sm | ?    | SMC00520 | CDS | 1893772 | 1894089 | - | 30 | 30 | NIL | 289.17  | NIL | 306.58  | ON  | 387.26 | ON  | 366.18  | NIL | 318.91 |
| 1788 | ch:Sm | ?    | SMC00519 | CDS | 1894093 | 1895709 | - | 30 | 30 | ON  | 362.13  | ON  | 389.02  | NIL | 373.83 | ON  | 366.14  | NIL | 360.46 |
| 1789 | ch:Sm | ?    | SMC00518 | CDS | 1895706 | 1896413 | - | 30 | 30 | ON  | 336.71  | ON  | 356.73  | NIL | 342.76 | ON  | 362.85  | NIL | 318.6  |
| 1790 | ch:Sm | ?    | SMC00517 | CDS | 1896417 | 1896749 | - | 30 | 30 | ON  | 333.57  | ON  | 385.97  | ON  | 468.01 | ON  | 434.98  | ON  | 412.48 |
| 1791 | ch:Sm | ?    | SMC00516 | CDS | 1898065 | 1898067 | - | 30 | 30 | NIL | 332.65  | ON  | 336.77  | NIL | 331.53 | NIL | 341.1   | NIL | 324.88 |
| 1792 | ch:Sm | ?    | SMC00515 | CDS | 1898073 | 1899002 | - | 30 | 30 | NIL | 306.57  | NIL | 321.03  | NIL | 302.33 | NIL | 320.16  | NIL | 295.17 |
| 1793 | ch:Sm | ?    | SMC00514 | CDS | 1899024 | 1899052 | + | 30 | 30 | ON  | 352.08  | ON  | 318.12  | NIL | 369.4  | ON  | 358.56  | NIL | 311.59 |
| 1794 | ch:Sm | dkSA | SMC00469 | CDS | 1899714 | 1900802 | - | 30 | 30 | ON  | 410.86  | ON  | 418.12  | ON  | 460.35 | ON  | 445.29  | ON  | 399.81 |
| 1795 | ch:Sm | ?    | SMC00513 | CDS | 1899714 | 1900802 | - | 30 | 30 | ON  | 412.92  | ON  | 466.16  | ON  | 413.23 | ON  | 361.53  | ON  | 452.63 |
| 1796 | ch:Sm | ipe  | SMC00511 | CDS | 1901869 | 1902549 | + | 30 | 30 | NIL | 283.8   | NIL | 260.86  | NIL | 280.81 | NIL | 285.8   | NIL | 281.47 |
| 1797 | ch:Sm | ?    | SMC00510 | CDS | 1902496 | 1902383 | + | 30 | 30 | ON  | 369.27  | ON  | 340.64  | NIL | 343.87 | ON  | 387.19  | NIL | 333.08 |
| 1798 | ch:Sm | ?    | SMC00509 | CDS | 1902383 | 1903840 | + | 30 | 30 | ON  | 360.22  | ON  | 342.11  | NIL | 306.25 | NIL | 334.92  | NIL | 342.36 |
| 1799 | ch:Sm | purB | SMC00508 | CDS | 1903904 | 1905311 | + | 30 | 30 | ON  | 604.96  | ON  | 408.3   | ON  | 427.23 | ON  | 461.75  | NIL | 412.96 |
| 1800 | ch:Sm | ?    | SMC00507 | CDS | 1905466 | 1905771 | + | 30 | 30 | ON  | 320.49  | NIL | 323.6   | NIL | 311.34 | ON  | 350.61  | NIL | 292.78 |
| 1801 | ch:Sm | ?    | SMC00506 | CDS | 1906845 | 1906654 | - | 30 | 30 | ON  | 356.69  | ON  | 458.98  | NIL | 360.8  | ON  | 429.06  | NIL | 355.07 |
| 1802 | ch:Sm | ?    | SMC00505 | CDS | 1906816 | 1907370 | + | 30 | 30 | ON  | 490.32  | ON  | 364.78  | ON  | 465.67 | ON  | 432.25  | NIL | 345.22 |
| 1803 | ch:Sm | ?    | SMC00504 | CDS | 1907397 | 1908635 | - | 30 | 30 | ON  | 313.78  | ON  | 337.13  | NIL | 351.85 | ON  | 373.05  | NIL | 325.57 |
| 1804 | ch:Sm | ?    | SMC00503 | CDS | 1908748 | 1909482 | + | 30 | 30 | NIL | 263.45  | NIL | 284.19  | NIL | 326.09 | NIL | 318.63  | NIL | 311.72 |
| 1805 | ch:Sm | ?    | SMC00502 | CDS | 1909479 | 1910153 | + | 30 | 30 | ON  | 354.6   | ON  | 368.33  | ON  | 403.97 | ON  | 450.73  | NIL | 368.53 |
| 1806 | ch:Sm | ?    | SMC00501 | CDS | 1910194 | 191078  | + | 30 | 30 | ON  | 367.07  | NIL | 319.26  | ON  | 413.86 | ON  | 384.74  | ON  | 372.19 |
| 1807 | ch:Sm | ?    | SMC00500 | CDS | 1911080 | 1912597 | + | 30 | 30 | ON  | 347.11  | ON  | 339.23  | ON  | 384.74 | ON  | 368.49  | NIL | 350.71 |
| 1808 | ch:Sm | ?    | SMC00499 | CDS | 1912656 | 1913612 | + | 30 | 30 | ON  | 333.35  | ON  | 350.75  | NIL | 327.14 | NIL | 304.38  | NIL | 338.29 |
| 1809 | ch:Sm | ?    | SMC00498 | CDS | 1913609 | 1914115 | + | 30 | 30 | ON  | 326.09  | NIL | 305.39  | NIL | 353.12 | NIL | 331.64  | NIL | 303.89 |
| 1810 | ch:Sm | ?    | SMC00497 | CDS | 1914139 | 1915197 | + | 30 | 30 | ON  | 353.82  | NIL | 308.66  | NIL | 315.34 | NIL | 328.79  | ON  | 338.79 |
| 1811 | ch:Sm | ?    | SMC00496 | CDS | 1915262 | 1915576 | - | 30 | 30 | ON  | 690.41  | ON  | 780.34  | ON  | 442.65 | ON  | 709.68  | ON  | 472.8  |
| 1812 | ch:Sm | purC | SMC00495 | CDS | 1915805 | 1916569 | + | 30 | 30 | ON  | 801.28  | ON  | 537.37  | ON  | 381.19 | ON  | 469.77  | ON  | 422.3  |
| 1813 | ch:Sm | ?    | SMC00494 | CDS | 1916888 | 1916830 | + | 30 | 30 | ON  | 1003.38 | ON  | 528.5   | NIL | 296.94 | ON  | 380.48  | NIL | 358.19 |
| 1814 | ch:Sm | purO | SMC00493 | CDS | 1916912 | 1917583 | + | 30 | 30 | ON  | 598.08  | ON  | 442.06  | NIL | 369.5  | ON  | 421.51  | NIL | 377.46 |
| 1815 | ch:Sm | ?    | SMC00492 | CDS | 1917689 | 1918096 | + | 30 | 30 | ON  | 391.66  | ON  | 358.12  | NIL | 323.24 | ON  | 362.27  | NIL | 371.46 |
| 1816 | ch:Sm | ?    | SMC00491 | CDS | 1918202 | 1918354 | - | 30 | 30 | NIL | 271.67  | NIL | 258.04  | NIL | 267.41 | NIL | 273.24  | NIL | 280.1  |
| 1817 | ch:Sm | ?    | SMC00490 | CDS | 1918527 | 1919945 | + | 30 | 30 | ON  | 368.84  | NIL | 358.12  | ON  | 346.71 | ON  | 348.7   | NIL | 371.54 |
| 1818 | ch:Sm | ?    | SMC00489 | CDS | 1920037 | 1920627 | + | 30 | 30 | ON  | 679.17  | ON  | 520.86  | ON  | 471.74 | ON  | 433.86  | ON  | 432.69 |
| 1819 | ch:Sm | purL | SMC00488 | CDS | 1921045 | 1923276 | + | 30 | 30 | ON  | 521.17  | ON  | 453.03  | ON  | 458.52 | ON  | 483.1   | NIL | 407.57 |
| 1820 | ch:Sm | ?    | SMC00487 | CDS | 1923402 | 1923635 | + | 30 | 30 | ON  | 549.83  | ON  | 498.55  | NIL | 349.34 | ON  | 385.46  | ON  | 317.54 |
| 1821 | ch:Sm | ?    | SMC00538 | CDS | 1924050 | 1924385 | + | 30 | 30 | ON  | 831.01  | ON  | 528.53  | ON  | 626.15 | ON  | 684.43  | ON  | 462.63 |
| 1822 | ch:Sm | ?    | SMC00537 | CDS | 1924736 | 1925974 | + | 30 | 30 | ON  | 501.32  | ON  | 396.99  | NIL | 303.82 | ON  | 353.48  | NIL | 302.31 |
| 1823 | ch:Sm | ?    | SMC00536 | CDS | 1926032 | 1927345 | + | 30 | 30 | ON  | 405.99  | ON  | 357.73  | NIL | 293.53 | ON  | 341.02  | NIL | 319.8  |
| 1824 | ch:Sm | ?    | SMC00535 | CDS | 1927461 | 1928285 | - | 31 | 31 | ON  | 403.19  | ON  | 390.73  | ON  | 420.17 | ON  | 404.18  | NIL | 358.41 |
| 1825 | ch:Sm | ?    | SMC00534 | CDS | 1928282 | 1929223 | - | 30 | 30 | ON  | 407.09  | ON  | 403.05  | ON  | 392.58 | ON  | 401.09  | NIL | 393.93 |
| 1826 | ch:Sm | glsA | SMC00486 | CDS | 1929452 | 1930399 | - | 30 | 30 | ON  | 456.81  | ON  | 375.16  | NIL | 325.17 | NIL | 334.33  | NIL | 306.64 |
| 1827 | ch:Sm | psd  | SMC00485 | CDS | 1930345 | 1931162 | - | 30 | 30 | ON  | 2538.03 | ON  | 1000.29 | ON  | 784.62 | ON  | 1051.13 | NIL | 758.7  |
| 1828 | ch:Sm | ?    | SMC00484 | CDS | 1930545 | 1932928 | - | 30 | 30 | ON  | 415.53  | ON  | 354.87  | NIL | 365.22 | ON  | 345.09  | NIL | 345.06 |
| 1829 | ch:Sm | mutL | SMC00483 | CDS | 1931414 | 1933899 | - | 30 | 30 | ON  | 319.13  | ON  | 339.13  | NIL | 321.82 | NIL | 291.84  | NIL | 293.64 |
| 1830 | ch:Sm | ?    | SMC00482 | CDS | 1933066 | 1934716 | - | 30 | 30 | ON  | 478.19  | ON  | 396.61  | NIL | 358.67 | ON  | 373.03  | ON  | 392.48 |
| 1831 | ch:Sm | ?    | SMC00481 | CDS | 1934767 | 1936782 | - | 30 | 30 | ON  | 397.78  | ON  | 397.8   | ON  | 405.5  | ON  | 377.03  | ON  | 391.57 |
| 1832 | ch:Sm | icd  | SMC00480 | CDS | 1937089 | 1938303 | + | 30 | 30 | ON  | 839.39  | ON  | 543.14  | ON  | 494.51 | ON  | 635.55  | NIL | 457.59 |
| 1833 | ch:Sm | ?    | SMC00479 | CDS | 1938413 | 1939429 | - | 30 | 30 | NIL | 298.11  | ON  | 357.39  | NIL | 296.24 | NIL | 328.12  | NIL | 334.15 |
| 1834 | ch:Sm | ?    | SMC00549 | CDS | 1939583 | 1940149 | + | 30 | 30 | ON  | 337.98  | NIL | 293.47  | NIL | 309.37 | NIL | 297.35  | NIL | 296.09 |
| 1835 | ch:Sm | ?    | SMC00478 | CDS | 1940239 | 1941762 | + | 30 | 30 | NIL | 314.94  | NIL | 308.41  | NIL | 340.2  | NIL | 331.26  | ON  | 385.55 |
| 1836 | ch:Sm | ?    | SMC00477 | CDS | 1941818 | 1943281 | + | 30 | 30 | NIL | 277.08  | NIL | 294.08  | NIL | 350.91 | NIL | 310.82  | NIL | 334.14 |
| 1837 | ch:Sm | ?    | SMC00476 | CDS | 1943574 | 1945229 | + | 30 | 30 | ON  | 307.52  | ON  | 322.39  | NIL | 309.51 | NIL | 311.3   | NIL | 379.18 |
| 1838 | ch:Sm | blas | SMC00475 | CDS | 1945275 | 1947938 | - | 30 | 30 | ON  | 546.19  | ON  | 460.51  | ON  | 410.39 | ON  | 466.87  | NIL | 363.9  |
| 1839 | ch:Sm | recA | SMC00760 | CDS | 1948178 | 1949224 | - | 30 | 30 | ON  | 568.17  | ON  | 405.89  | ON  | 434.69 | ON  | 395.64  | ON  | 312.58 |
| 1840 | ch:Sm | ?    | SMC00473 | CDS | 1949597 | 1950556 | + | 30 | 30 | ON  | 343.28  | NIL | 314.16  | NIL | 333.17 | ON  | 346.67  | NIL | 386.53 |
| 1841 | ch:Sm | ?    | SMC00472 | CDS | 1950695 | 1951627 | + | 30 | 30 | ON  | 471.5   | ON  | 334.35  | ON  | 403.14 | ON  | 384.68  | NIL | 290.42 |
| 1842 | ch:Sm | ?    | SMC00471 | CDS | 1952055 | 1954664 | - | 30 | 30 | ON  | 342.92  | ON  | 327.04  | NIL | 299.52 | NIL | 304.85  | NIL | 562.46 |
| 1843 | ch:Sm | ?    | SMC00470 | CDS | 1955031 | 1955956 | + | 30 | 30 | ON  | 600.43  | ON  | 337.04  | NIL | 526.88 | ON  | 304.85  | ON  | 412.12 |
| 1844 | ch:Sm | dkSA | SMC00469 | CDS | 1956089 | 1956508 | - | 30 | 30 | ON  | 454.97  | ON  | 466.11  | ON  | 433.5  | ON  | 541.62  | ON  | 306.46 |
| 1845 | ch:Sm | ?    | SMC00468 | CDS | 1956976 | 1957452 | + | 30 | 30 | ON  | 391.15  | ON  | 406.71  | NIL | 316.84 | ON  | 387.78  | NIL | 351.91 |
| 1846 | ch:Sm | ?    | SMC00467 | CDS | 1957621 | 1959120 | + | 30 | 30 | ON  | 400.75  | ON  | 387.17  | NIL | 332.98 | NIL | 333.83  | NIL | 398.77 |
| 1847 | ch:Sm | ?    | SMC00466 | CDS | 1959117 | 1960196 | + | 30 | 30 | ON  | 381.72  | ON  | 399.04  | NIL | 374.4  | ON  | 354.52  | NIL | 369.77 |
| 1848 | ch:Sm | ?    | SMC00548 | CDS | 1960331 | 1960882 | + | 30 | 30 | ON  | 438.15  | ON  | 538.48  | ON  | 399.24 | ON  | 460.6   | NIL | 346.08 |
| 1849 | ch:Sm | fkK  | SMC00465 | CDS | 1960922 | 1961446 | - | 30 | 30 | NIL | 354.7   | ON  | 268.65  | NIL | 278.48 | ON  | 285.67  | NIL | 292.79 |
| 1850 | ch:Sm | blb  | SMC00463 | CDS | 1961433 | 1961804 | - | 30 | 30 | ON  | 312.34  | NIL | 323.34  | NIL | 364.12 | ON  | 340.43  | NIL | 326.33 |
| 1851 | ch:Sm | blp  | SMC00462 | CDS | 1961819 | 1962870 | - | 30 | 30 | ON  | 423.91  | ON  | 320.33  | NIL | 371.72 | ON  | 268.34  | NIL | 269.9  |
| 1852 | ch:Sm | ?    | SMC00194 | CDS | 1962837 | 1963302 | + | 30 | 30 | NIL | 322.3   | ON  | 330.88  | NIL | 240.08 | NIL | 288.02  | NIL | 302.4  |
| 1853 | ch:Sm | ?    | SMC00193 | CDS | 1963692 | 1963859 | - | 30 | 30 | NIL | 258.69  | NIL | 261.85  | NIL | 279.07 | ON  | 292.57  | NIL | 282.62 |
| 1854 | ch:Sm | fkX  | SMC00192 | CDS | 1963877 | 1964307 | - | 30 | 30 | ON  | 402.55  | ON  | 344.46  | NIL | 280.37 | NIL | 302.91  | NIL |        |
| 1855 | ch:Sm | ?    | SMC00191 | CDS | 1964715 | 1965083 | - | 30 | 30 | ON  | 324.54  | ON  | 368.96  | NIL | 280.37 | NIL | 3       |     |        |

|      |       |                 |     |         |           |    |    |     |         |     |        |     |        |     |        |     |        |
|------|-------|-----------------|-----|---------|-----------|----|----|-----|---------|-----|--------|-----|--------|-----|--------|-----|--------|
| 1856 | chrSm | 7. SMC00190     | CDS | 1965700 | 1971969 + | 30 | 30 | ON  | 596.23  | ON  | 559.23 | ON  | 433.97 | ON  | 720.28 | ON  | 603.54 |
| 1857 | chrSm | flbc: SMC00189  | CDS | 1972800 | 1973675 - | 30 | 30 | ON  | 935.66  | ON  | 595.23 | ON  | 393.31 | ON  | 467.15 | ON  | 491.53 |
| 1858 | chrSm | flbc: SMC00188  | CDS | 1973708 | 1974988 - | 30 | 30 | ON  | 2076.44 | ON  | 657.9  | ON  | 513.73 | ON  | 769.34 | ON  | 658.17 |
| 1859 | chrSm | flbc: SMC00187  | CDS | 1975003 | 1975581 - | 30 | 30 | ON  | 2304.64 | ON  | 574.6  | ON  | 401.19 | ON  | 672.97 | ON  | 443.95 |
| 1860 | chrSm | 7. SMC00186     | CDS | 1975896 | 1977818 - | 30 | 30 | ON  | 315.86  | NIL | 324.02 | NIL | 309.62 | NIL | 305.63 | NIL | 330.77 |
| 1861 | chrSm | 7. SMC00185     | CDS | 1977878 | 1979731 - | 30 | 30 | NIL | 331.49  | ON  | 317.72 | NIL | 312.35 | ON  | 353.5  | NIL | 345.11 |
| 1862 | chrSm | 7. SMC00184     | CDS | 1980206 | 1980667 + | 30 | 30 | ON  | 331.49  | ON  | 317.72 | NIL | 410.9  | ON  | 379.22 | NIL | 371.77 |
| 1863 | chrSm | 7. SMC00183     | CDS | 1981292 | 1981292 - | 30 | 30 | ON  | 340.85  | NIL | 318.98 | NIL | 374.32 | ON  | 349.27 | NIL | 316.62 |
| 1864 | chrSm | 7. SMC00182     | CDS | 1981371 | 1981856 + | 30 | 30 | NIL | 310.99  | NIL | 321.72 | ON  | 323.81 | NIL | 279.42 | NIL | 322.42 |
| 1865 | chrSm | 7. SMC00196     | CDS | 1981853 | 1982980 - | 30 | 30 | ON  | 465.8   | ON  | 465.97 | ON  | 372.08 | NIL | 368.96 | NIL | 369.91 |
| 1866 | chrSm | 7. SMC00181     | CDS | 1983181 | 1983441 - | 30 | 30 | NIL | 287.72  | NIL | 288.83 | NIL | 320.19 | NIL | 311.39 | NIL | 330.64 |
| 1867 | chrSm | hepf: SMC00180  | CDS | 1983444 | 1984555 + | 30 | 30 | ON  | 467.34  | ON  | 321.53 | NIL | 314.4  | NIL | 288.51 | NIL | 337.1  |
| 1868 | chrSm | 7. SMC00178     | CDS | 1984399 | 1984917 + | 30 | 30 | NIL | 275.73  | ON  | 274.22 | NIL | 304.05 | NIL | 263.91 | NIL | 294.59 |
| 1869 | chrSm | 7. SMC00177     | CDS | 1985493 | 1985583 - | 30 | 30 | ON  | 324.93  | ON  | 330.93 | NIL | 338.16 | ON  | 336.71 | NIL | 346.45 |
| 1870 | chrSm | 7. SMC00176     | CDS | 1985652 | 1986566 - | 30 | 30 | ON  | 484.7   | ON  | 515.48 | NIL | 389.8  | ON  | 373.33 | NIL | 377.64 |
| 1871 | chrSm | 7. SMC00175     | CDS | 1986348 | 1987722 - | 30 | 30 | ON  | 395.25  | ON  | 360.49 | NIL | 342.69 | ON  | 362.41 | NIL | 330.75 |
| 1872 | chrSm | 7. SMC00174     | CDS | 1987809 | 1988618 - | 30 | 30 | ON  | 361.94  | ON  | 355.13 | NIL | 326.13 | NIL | 316.13 | NIL | 323.59 |
| 1873 | chrSm | 7. SMC00173     | CDS | 1988630 | 1989769 - | 30 | 30 | ON  | 328.11  | ON  | 330.74 | NIL | 331.79 | ON  | 352.2  | NIL | 323.86 |
| 1874 | chrSm | 7. SMC00459     | CDS | 1989955 | 1990938 + | 31 | 31 | ON  | 359.78  | ON  | 360.03 | ON  | 434.33 | ON  | 358.64 | NIL | 424.65 |
| 1875 | chrSm | 7. SMC00172     | CDS | 1990890 | 1992113 - | 30 | 30 | ON  | 327.49  | ON  | 352.37 | NIL | 284.2  | NIL | 297.24 | NIL | 295.28 |
| 1876 | chrSm | 7. SMC00171     | CDS | 1992362 | 1993207 - | 30 | 30 | NIL | 286.47  | NIL | 252.37 | NIL | 181.67 | NIL | 308.23 | NIL | 330.8  |
| 1877 | chrSm | dme: SMC00169   | CDS | 1993451 | 1995763 + | 30 | 30 | ON  | 546.43  | ON  | 410.23 | ON  | 413.09 | ON  | 458.43 | ON  | 421.64 |
| 1878 | chrSm | 7. SMC00170     | CDS | 1995669 | 1995706 + | 30 | 30 | ON  | 381.51  | ON  | 459.04 | NIL | 358.72 | NIL | 332.76 | ON  | 373.31 |
| 1879 | chrSm | 7. SMC00168     | CDS | 1995675 | 1997507 + | 30 | 30 | ON  | 384.5   | ON  | 508.92 | ON  | 471.24 | ON  | 475.95 | ON  | 440.6  |
| 1880 | chrSm | 7. SMC00167     | CDS | 1996863 | 1998802 + | 30 | 30 | ON  | 398.41  | ON  | 433.98 | ON  | 401.45 | ON  | 410.38 | NIL | 403.81 |
| 1881 | chrSm | 7. SMC00166     | CDS | 1998826 | 1999509 - | 30 | 30 | NIL | 310.06  | ON  | 305.57 | NIL | 325.19 | NIL | 304.59 | NIL | 312.18 |
| 1882 | chrSm | 7. SMC00165     | CDS | 1999807 | 2000628 - | 30 | 30 | ON  | 337.7   | ON  | 385.6  | ON  | 399.67 | ON  | 380.24 | NIL | 353.7  |
| 1883 | chrSm | 7. SMC00164     | CDS | 2001000 | 2002193 - | 30 | 30 | NIL | 278.33  | NIL | 310.31 | NIL | 337.44 | ON  | 356.75 | NIL | 323.71 |
| 1884 | chrSm | 7. SMC00163     | CDS | 2002291 | 2003313 + | 30 | 30 | ON  | 323.13  | ON  | 332.24 | NIL | 346.85 | NIL | 329.15 | NIL | 343.95 |
| 1885 | chrSm | 7. SMC00162     | CDS | 2003324 | 2004151 - | 30 | 30 | ON  | 405.95  | ON  | 423.27 | NIL | 350.15 | ON  | 379.68 | NIL | 346.1  |
| 1886 | chrSm | radE2: SMC00161 | CDS | 2004154 | 2005836 - | 30 | 30 | ON  | 359.26  | ON  | 339.24 | NIL | 369.24 | ON  | 393.22 | NIL | 367.25 |
| 1887 | chrSm | cgmb: SMC0438   | CDS | 2006048 | 2007997 - | 32 | 32 | NIL | 287.74  | NIL | 303.02 | NIL | 308.66 | NIL | 297.28 | NIL | 337.93 |
| 1888 | chrSm | cgmb: SMC00195  | CDS | 2006105 | 2008024 + | 33 | 33 | ON  | 359.57  | ON  | 357.47 | NIL | 313.17 | ON  | 345.49 | NIL | 337.93 |
| 1889 | chrSm | 7. SMC00159     | CDS | 2008451 | 2009073 + | 30 | 30 | ON  | 353.23  | ON  | 342.14 | NIL | 312.34 | ON  | 362.71 | NIL | 340.73 |
| 1890 | chrSm | 7. SMC00158     | CDS | 2009075 | 2010808 + | 30 | 30 | ON  | 343.01  | ON  | 375.23 | NIL | 325.99 | ON  | 352.21 | NIL | 340.73 |
| 1891 | chrSm | 7. SMC00157     | CDS | 2010950 | 2011832 + | 30 | 30 | ON  | 327.9   | ON  | 356.82 | NIL | 367.63 | ON  | 378.63 | NIL | 377.81 |
| 1892 | chrSm | 7. SMC00156     | CDS | 2011874 | 2012269 - | 30 | 30 | ON  | 321.6   | ON  | 373.58 | NIL | 332.67 | ON  | 415.51 | NIL | 318.22 |
| 1893 | chrSm | aro: SMC00155   | CDS | 2012405 | 2013778 - | 30 | 30 | ON  | 526.59  | ON  | 558.91 | ON  | 566.79 | ON  | 430.54 | ON  | 423.57 |
| 1894 | chrSm | gpc: SMC00154   | CDS | 2012405 | 2015402 - | 30 | 30 | ON  | 711.56  | ON  | 414.57 | ON  | 462.22 | ON  | 395.69 | ON  | 436.56 |
| 1895 | chrSm | 7. SMC00153     | CDS | 2015607 | 2016149 - | 30 | 30 | ON  | 473.26  | ON  | 400.3  | NIL | 342.21 | ON  | 368.19 | NIL | 343.48 |
| 1896 | chrSm | 7. SMC00152     | CDS | 2016261 | 2016956 - | 30 | 30 | ON  | 497.87  | ON  | 420.16 | NIL | 344.35 | ON  | 405.38 | NIL | 372.86 |
| 1897 | chrSm | gph1: SMC00151  | CDS | 2017176 | 2017859 + | 30 | 30 | ON  | 359.42  | NIL | 314.99 | NIL | 340.32 | NIL | 329.49 | NIL | 305.91 |
| 1898 | chrSm | 7. SMC00150     | CDS | 2017892 | 2019787 - | 30 | 30 | ON  | 563.35  | ON  | 606.17 | ON  | 592.23 | ON  | 641.55 | ON  | 578.15 |
| 1899 | chrSm | flunc: SMC00149 | CDS | 2020183 | 2021676 + | 30 | 30 | ON  | 556.62  | ON  | 488.76 | ON  | 420.01 | ON  | 478.13 | NIL | 590.64 |
| 1900 | chrSm | 7. SMC00148     | CDS | 2021723 | 2022331 - | 30 | 30 | ON  | 371.47  | ON  | 345.66 | NIL | 365.19 | ON  | 361.49 | NIL | 361.49 |
| 1901 | chrSm | 7. SMC00147     | CDS | 2022428 | 2023345 - | 30 | 30 | ON  | 349.34  | ON  | 394.53 | NIL | 362.63 | ON  | 343.36 | NIL | 332.82 |
| 1902 | chrSm | 7. SMC00146     | CDS | 2023390 | 2023881 + | 30 | 30 | ON  | 329.03  | ON  | 364.67 | NIL | 339.35 | ON  | 363.45 | NIL | 363.45 |
| 1903 | chrSm | 7. SMC00145     | CDS | 2023924 | 2024430 - | 30 | 30 | ON  | 329.88  | ON  | 385.94 | NIL | 359.52 | NIL | 338.64 | NIL | 359.52 |
| 1904 | chrSm | moaA: SMC00144  | CDS | 2024458 | 2025507 + | 30 | 30 | ON  | 567.76  | ON  | 607.45 | ON  | 461.64 | NIL | 551.7  | ON  | 433.13 |
| 1905 | chrSm | 7. SMC00197     | CDS | 2025754 | 2026662 + | 30 | 30 | ON  | 391.89  | ON  | 320.55 | NIL | 320.34 | NIL | 295.67 | NIL | 291.88 |
| 1906 | chrSm | moaB: SMC00143  | CDS | 2026678 | 2027334 + | 30 | 30 | NIL | 300.19  | NIL | 320.55 | NIL | 331.73 | NIL | 314.91 | NIL | 354.07 |
| 1907 | chrSm | moaB: SMC00142  | CDS | 2027331 | 2027855 + | 30 | 30 | ON  | 396.38  | ON  | 371.71 | NIL | 362.74 | ON  | 368.18 | NIL | 324.83 |
| 1908 | chrSm | 7. SMC00141     | CDS | 2027970 | 2029985 - | 31 | 28 | ON  | 528.06  | ON  | 425.02 | ON  | 468.93 | ON  | 383.27 | NIL | 384.73 |
| 1909 | chrSm | 7. SMC00198     | CDS | 2030050 | 2030202 - | 30 | 30 | ON  | 529.67  | ON  | 376.38 | NIL | 297.53 | NIL | 291.9  | NIL | 262.79 |
| 1910 | chrSm | 7. SMC00140     | CDS | 2030358 | 2031320 + | 30 | 30 | ON  | 802.34  | ON  | 935.59 | ON  | 530.27 | ON  | 865.42 | ON  | 602.97 |
| 1911 | chrSm | 7. SMC00139     | CDS | 2031583 | 2032386 + | 30 | 30 | ON  | 457.82  | ON  | 366.93 | NIL | 360.76 | ON  | 386.22 | NIL | 334.93 |
| 1912 | chrSm | 7. SMC00138     | CDS | 2032883 | 2033218 + | 30 | 30 | ON  | 435.12  | ON  | 429.36 | ON  | 414.29 | ON  | 407.73 | NIL | 355.4  |
| 1913 | chrSm | 7. SMC00137     | CDS | 2033385 | 2033651 + | 30 | 30 | NIL | 242.62  | ON  | 325.61 | NIL | 293.04 | NIL | 325.13 | ON  | 288.22 |
| 1914 | chrSm | 7. SMC00136     | CDS | 2033792 | 2034496 - | 30 | 30 | ON  | 452.64  | ON  | 455.08 | ON  | 400.01 | NIL | 443.59 | ON  | 402.69 |
| 1915 | chrSm | 7. SMC00135     | CDS | 2034516 | 2035347 - | 30 | 30 | ON  | 318.89  | ON  | 350.59 | NIL | 369.47 | ON  | 354.06 | NIL | 317.45 |
| 1916 | chrSm | 7. SMC00134     | CDS | 2035886 | 2036343 + | 30 | 30 | ON  | 523.41  | ON  | 393.51 | NIL | 365.76 | ON  | 398.68 | NIL | 333.14 |
| 1917 | chrSm | 7. SMC00133     | CDS | 2036481 | 2037350 + | 30 | 30 | ON  | 455.78  | ON  | 516.48 | ON  | 535.61 | ON  | 526.54 | NIL | 440.48 |
| 1918 | chrSm | 7. SMC00132     | CDS | 2037347 | 2038045 + | 30 | 30 | ON  | 393.4   | ON  | 392.09 | NIL | 351.79 | ON  | 398.24 | NIL | 362.29 |
| 1919 | chrSm | 7. SMC00131     | CDS | 2038090 | 2038678 - | 30 | 30 | ON  | 446.97  | ON  | 476.97 | NIL | 349.04 | ON  | 417.58 | NIL | 374.44 |
| 1920 | chrSm | 7. SMC04210     | CDS | 2039272 | 2039272 - | 30 | 30 | NIL | 305.56  | NIL | 289.07 | NIL | 318.65 | NIL | 300.48 | NIL | 286.71 |
| 1921 | chrSm | 7. SMC04211     | CDS | 2039265 | 2039852 - | 30 | 30 | ON  | 319.7   | NIL | 291.52 | NIL | 332.57 | NIL | 285.92 | NIL | 297.11 |
| 1922 | chrSm | dgkA: SMC04213  | CDS | 2040134 | 2041669 + | 30 | 30 | ON  | 368.18  | ON  | 393.36 | NIL | 351.12 | ON  | 386.96 | NIL | 373.48 |
| 1923 | chrSm | 1924 chrSm      | CDS | 2041698 | 2042171 - | 30 | 30 | ON  | 323.51  | ON  | 334.27 | NIL | 284.81 | NIL | 306.79 | NIL | 325.55 |
| 1924 | chrSm | codU: SMC04214  | CDS | 2043332 | 2043332 - | 30 | 30 | ON  | 459.82  | ON  | 390.92 | NIL | 374.74 | ON  | 372.82 | NIL | 365.17 |
| 1925 | chrSm | codV: SMC04215  | CDS | 2043771 | 2044259 + | 30 | 30 | ON  | 404.84  | ON  | 354.51 | NIL | 312.26 | ON  | 406.73 | NIL | 375.06 |
| 1926 | chrSm | 7. SMC04216     | CDS | 2044306 | 2044527 + | 30 | 30 | ON  | 356.26  | ON  | 379.8  | ON  | 463.46 | ON  | 444.18 | NIL | 372.15 |
| 1927 | chrSm | 7. SMC04217     | CDS | 2044525 | 2044525 + | 30 | 30 | ON  | 346.23  | ON  | 352.81 | NIL | 333.87 | NIL | 322.57 | NIL | 324.47 |

|      |       |                 |     |         |         |    |    |    |     |        |     |        |     |        |     |        |     |        |
|------|-------|-----------------|-----|---------|---------|----|----|----|-----|--------|-----|--------|-----|--------|-----|--------|-----|--------|
| 1928 | chrSm | ?_SMC04218      | CDS | 2045245 | 2046006 | -  | 30 | 30 | ON  | 362.87 | ON  | 356.08 | NIL | 292.49 | NIL | 310.66 | NIL | 310.18 |
| 1929 | chrSm | ?_SMC04219      | CDS | 2046003 | 2046929 | ON | 30 | 30 | ON  | 461.58 | ON  | 396.28 | NIL | 343.12 | NIL | 356.66 | NIL | 330.83 |
| 1930 | chrSm | ?_SMC04220      | CDS | 2047050 | 2047050 | 30 | 30 | 30 | NIL | 256.71 | NIL | 262.54 | NIL | 284.53 | NIL | 276.27 | NIL | 289.86 |
| 1931 | chrSm | ?_SMC04221      | CDS | 2047573 | 2048097 | -  | 32 | 32 | ON  | 320.9  | ON  | 362.31 | NIL | 361.06 | ON  | 345.26 | NIL | 348.82 |
| 1932 | chrSm | ?_SMC04222      | CDS | 2048090 | 2048380 | -  | 30 | 30 | ON  | 514.33 | ON  | 624.9  | NIL | 367.06 | ON  | 502.3  | ON  | 424.39 |
| 1933 | chrSm | ?_SMC04223      | CDS | 2048520 | 2049155 | -  | 30 | 30 | ON  | 335.8  | ON  | 307.1  | NIL | 322.22 | NIL | 299.23 | NIL | 335.42 |
| 1934 | chrSm | ?_SMC04224      | CDS | 2049353 | 2049703 | +  | 30 | 30 | NIL | 255.44 | NIL | 320.91 | NIL | 289.3  | NIL | 275.86 | NIL | 316.18 |
| 1935 | chrSm | ?_SMC04225      | CDS | 2049933 | 2051129 | -  | 30 | 30 | ON  | 344.63 | ON  | 330.91 | NIL | 362.93 | ON  | 348.63 | NIL | 348.63 |
| 1936 | chrSm | ?_SMC04226      | CDS | 2051379 | 2051933 | -  | 30 | 30 | ON  | 340.6  | ON  | 397    | NIL | 331.07 | ON  | 365.88 | NIL | 352.35 |
| 1937 | chrSm | mcgV:SMC04227   | CDS | 2052167 | 2053981 | +  | 30 | 30 | NIL | 303.12 | ON  | 310.48 | ON  | 389.1  | ON  | 427.83 | NIL | 342.28 |
| 1938 | chrSm | ?_SMC04228      | CDS | 2054191 | 2054580 | +  | 30 | 30 | ON  | 511.52 | ON  | 341.32 | NIL | 295.7  | NIL | 328.96 | NIL | 323.71 |
| 1939 | chrSm | ?_SMC04229      | CDS | 2055182 | 2055565 | +  | 30 | 30 | ON  | 321.6  | ON  | 322.66 | NIL | 256.3  | NIL | 265.3  | NIL | 268.03 |
| 1940 | chrSm | ?_SMC04230      | CDS | 2055212 | 2055565 | -  | 30 | 30 | ON  | 407.65 | ON  | 322.66 | NIL | 440.44 | ON  | 458.84 | ON  | 425.03 |
| 1941 | chrSm | uwrB:SMC04231   | CDS | 2055780 | 2058737 | +  | 30 | 30 | ON  | 496.94 | ON  | 472.16 | NIL | 361.72 | ON  | 356.73 | ON  | 346.55 |
| 1942 | chrSm | ?_SMC04232      | CDS | 2059034 | 2059614 | +  | 30 | 30 | ON  | 320.5  | NIL | 308.06 | NIL | 293.04 | NIL | 325.32 | NIL | 301.39 |
| 1943 | chrSm | ?_SMC04233      | CDS | 2059894 | 2060511 | +  | 30 | 30 | ON  | 312.67 | NIL | 936.52 | ON  | 590.56 | ON  | 795.08 | NIL | 716.06 |
| 1944 | chrSm | CSPI:SMC04234   | CDS | 2061342 | 2061554 | +  | 30 | 30 | ON  | 165.19 | ON  | 330.05 | NIL | 356.33 | ON  | 344.66 | NIL | 331.84 |
| 1945 | chrSm | ?_SMC04235      | CDS | 2061682 | 2062761 | +  | 30 | 30 | ON  | 317.35 | ON  | 330.05 | NIL | 356.33 | ON  | 344.66 | NIL | 331.84 |
| 1946 | chrSm | ?_SMC04236      | CDS | 2063208 | 2063960 | +  | 30 | 30 | NIL | 279.34 | ON  | 345.35 | NIL | 280.03 | NIL | 320.48 | NIL | 300.69 |
| 1947 | chrSm | ?_SMC04237      | CDS | 2064120 | 2064368 | +  | 30 | 30 | NIL | 250.71 | NIL | 238.43 | NIL | 301.2  | NIL | 267.57 | NIL | 292.57 |
| 1948 | chrSm | ?_SMC04238      | CDS | 2064803 | 2065039 | +  | 30 | 30 | ON  | 360.46 | ON  | 401.07 | ON  | 403.62 | ON  | 443.58 | ON  | 396.81 |
| 1949 | chrSm | ?_SMC04239      | CDS | 2065483 | 2065692 | +  | 30 | 30 | ON  | 365.26 | ON  | 490.97 | ON  | 398.94 | ON  | 485.23 | NIL | 310.64 |
| 1950 | chrSm | ?_SMC04240      | CDS | 2065879 | 2066665 | +  | 30 | 30 | ON  | 467.38 | ON  | 429.27 | ON  | 429.27 | ON  | 403.97 | ON  | 395.52 |
| 1951 | chrSm | ?_SMC04241      | CDS | 2066617 | 2067147 | +  | 30 | 30 | ON  | 380.49 | ON  | 497.26 | ON  | 385.84 | ON  | 390.96 | ON  | 399.01 |
| 1952 | chrSm | zur:SMC04242    | CDS | 2067157 | 2067552 | -  | 31 | 31 | NIL | 294.37 | NIL | 302.83 | NIL | 315.76 | NIL | 307.13 | NIL | 288.53 |
| 1953 | chrSm | znUB:SMC04243   | CDS | 2067552 | 2068379 | -  | 31 | 31 | NIL | 375.81 | ON  | 369.19 | NIL | 361.63 | ON  | 369.59 | NIL | 357.77 |
| 1954 | chrSm | znUC:SMC04244   | CDS | 2068372 | 2069247 | -  | 30 | 30 | ON  | 353.26 | ON  | 375.97 | NIL | 358.88 | ON  | 339.83 | NIL | 372.9  |
| 1955 | chrSm | znUA:SMC04245   | CDS | 2069425 | 2070447 | +  | 30 | 30 | ON  | 336.46 | NIL | 323.86 | NIL | 366.86 | NIL | 311.26 | NIL | 315.72 |
| 1956 | chrSm | ?_SMC04246      | CDS | 2070841 | 2071221 | -  | 30 | 30 | ON  | 349.23 | NIL | 291.84 | NIL | 285.17 | NIL | 312.33 | NIL | 323.04 |
| 1957 | chrSm | ?_SMC04247      | CDS | 2071350 | 2072975 | -  | 30 | 30 | ON  | 323.71 | ON  | 334.55 | NIL | 344.95 | NIL | 334.22 | NIL | 336.51 |
| 1958 | chrSm | ?_SMC04248      | CDS | 2073326 | 2073901 | +  | 37 | 37 | ON  | 501.15 | ON  | 405.42 | NIL | 362.12 | ON  | 493.19 | ON  | 371.59 |
| 1959 | chrSm | ?_SMC04249      | CDS | 2073898 | 2075691 | +  | 30 | 30 | ON  | 531.87 | ON  | 427.53 | ON  | 432.02 | ON  | 518.53 | ON  | 468.82 |
| 1960 | chrSm | Trn20:SMC04250  | CDS | 2075844 | 2077016 | +  | 74 | 0  | ON  | 351.96 | ON  | 359.43 | ON  | 325.53 | ON  | 367.97 | ON  | 325.53 |
| 1961 | chrSm | ?_SMC04251      | CDS | 2077366 | 2078472 | -  | 30 | 30 | ON  | 433.01 | ON  | 453.15 | ON  | 433.22 | ON  | 442.02 | NIL | 343.5  |
| 1962 | chrSm | ?_SMC04252      | CDS | 2078764 | 2079792 | -  | 30 | 30 | ON  | 557.78 | ON  | 447.02 | NIL | 380.33 | ON  | 742.98 | NIL | 376.64 |
| 1963 | chrSm | ?_SMC04253      | CDS | 2080085 | 2081218 | -  | 30 | 30 | ON  | 354.73 | ON  | 359.64 | ON  | 378.78 | ON  | 360.38 | NIL | 349.14 |
| 1964 | chrSm | ?_SMC04254      | CDS | 2081235 | 2081996 | -  | 30 | 30 | ON  | 358.24 | ON  | 372.13 | NIL | 329.9  | ON  | 339.91 | ON  | 302.16 |
| 1965 | chrSm | manB:1:SMC04255 | CDS | 2082053 | 2084548 | -  | 30 | 30 | NIL | 277.93 | NIL | 273.25 | NIL | 285.03 | NIL | 330.69 | NIL | 336.63 |
| 1966 | chrSm | ?_SMC04256      | CDS | 2084620 | 2086505 | -  | 30 | 30 | ON  | 388.74 | ON  | 336.37 | NIL | 366.63 | ON  | 390.55 | ON  | 388.86 |
| 1967 | chrSm | ?_SMC04257      | CDS | 2086572 | 2086654 | -  | 30 | 30 | NIL | 277.82 | NIL | 311.23 | NIL | 279.83 | NIL | 268.58 | NIL | 278.19 |
| 1968 | chrSm | ?_SMC04258      | CDS | 2086646 | 2087654 | -  | 30 | 30 | NIL | 292.3  | NIL | 308.79 | NIL | 286.59 | NIL | 315.07 | NIL | 307.29 |
| 1969 | chrSm | ?_SMC04259      | CDS | 2087747 | 2088982 | -  | 30 | 30 | NIL | 322.06 | ON  | 415.59 | ON  | 395.36 | ON  | 418.17 | NIL | 322.9  |
| 1970 | chrSm | ?_SMC04260      | CDS | 2089458 | 2090528 | +  | 30 | 30 | ON  | 416.46 | ON  | 361.56 | ON  | 407.41 | ON  | 383.42 | NIL | 349.4  |
| 1971 | chrSm | ?_SMC04261      | CDS | 2090636 | 2090902 | +  | 30 | 30 | ON  | 775.56 | ON  | 615.68 | ON  | 353.26 | NIL | 265.76 | NIL | 284.16 |
| 1972 | chrSm | gnd:SMC04262    | CDS | 2091007 | 2092437 | -  | 30 | 30 | ON  | 423.85 | NIL | 615.68 | ON  | 470.77 | ON  | 395.18 | NIL | 391.36 |
| 1973 | chrSm | ?_SMC04263      | CDS | 2092873 | 2094291 | +  | 30 | 30 | ON  | 372.47 | ON  | 332.7  | ON  | 344.22 | ON  | 371.15 | NIL | 342.74 |
| 1974 | chrSm | ?_SMC04264      | CDS | 2094373 | 2095263 | +  | 30 | 30 | ON  | 289.44 | ON  | 326.78 | NIL | 378.66 | ON  | 399.63 | NIL | 372.51 |
| 1975 | chrSm | ?_SMC04265      | CDS | 2095396 | 2095839 | +  | 34 | 34 | NIL | 271.43 | NIL | 305.96 | NIL | 311.81 | NIL | 319.24 | NIL | 314.29 |
| 1976 | chrSm | ?_SMC04266      | CDS | 2095823 | 2096176 | +  | 30 | 30 | NIL | 396.62 | NIL | 303.3  | NIL | 276.16 | NIL | 303.89 | NIL | 326.14 |
| 1977 | chrSm | msBB:SMC04268   | CDS | 2096413 | 2097351 | -  | 31 | 31 | ON  | 576.42 | ON  | 357.94 | NIL | 355.13 | ON  | 337.29 | NIL | 323.58 |
| 1978 | chrSm | ?_SMC04270      | CDS | 2097348 | 2098376 | -  | 30 | 30 | ON  | 576.42 | ON  | 357.94 | NIL | 359.84 | ON  | 375.53 | NIL | 312.52 |
| 1979 | chrSm | ?_SMC04271      | CDS | 2098613 | 2098986 | -  | 30 | 30 | ON  | 565.68 | ON  | 419.87 | ON  | 393.51 | ON  | 451.73 | ON  | 400.88 |
| 1980 | chrSm | ?_SMC04275      | CDS | 2101111 | 2101590 | -  | 30 | 30 | ON  | 473.62 | NIL | 435.1  | ON  | 416.27 | ON  | 424.43 | NIL | 361.12 |
| 1981 | chrSm | ?_SMC04277      | CDS | 2101114 | 2101590 | -  | 30 | 30 | ON  | 473.62 | NIL | 302.07 | ON  | 416.27 | ON  | 424.43 | NIL | 361.12 |
| 1982 | chrSm | acpXL:SMC04278  | CDS | 2101762 | 2102049 | -  | 30 | 30 | ON  | 605.63 | ON  | 407.94 | NIL | 365.67 | ON  | 476.03 | NIL | 386.1  |
| 1983 | chrSm | codD:SMC04279   | CDS | 2102200 | 2103183 | -  | 30 | 30 | ON  | 411.05 | ON  | 378.28 | ON  | 407.4  | ON  | 383.65 | NIL | 301.66 |
| 1984 | chrSm | codC:SMC04281   | CDS | 2103183 | 2104184 | -  | 30 | 30 | ON  | 400.75 | ON  | 352.93 | ON  | 402.05 | ON  | 369.51 | NIL | 356.51 |
| 1985 | chrSm | codB:SMC04282   | CDS | 2104187 | 2106312 | -  | 30 | 30 | ON  | 350.44 | ON  | 336.36 | NIL | 303.88 | NIL | 305.15 | NIL | 287.75 |
| 1986 | chrSm | codA:SMC04284   | CDS | 2105473 | 2106312 | -  | 30 | 30 | ON  | 344.7  | ON  | 341.72 | NIL | 305.1  | NIL | 314.98 | NIL | 314.98 |
| 1987 | chrSm | codE:SMC04285   | CDS | 2106446 | 2106874 | -  | 30 | 30 | ON  | 422.69 | ON  | 480.28 | ON  | 379.5  | ON  | 347.11 | NIL | 311.03 |
| 1988 | chrSm | ?_SMC04286      | CDS | 2107028 | 2107987 | +  | 30 | 30 | ON  | 417.58 | ON  | 337.74 | NIL | 305.61 | ON  | 345.44 | NIL | 321.92 |
| 1989 | chrSm | ?_SMC04288      | CDS | 2109804 | 2110817 | -  | 30 | 30 | ON  | 324.71 | NIL | 322.75 | NIL | 375.75 | NIL | 326.95 | NIL | 321.5  |
| 1990 | chrSm | ?_SMC04290      | CDS | 2110798 | 2110914 | -  | 31 | 31 | ON  | 346.54 | ON  | 322.75 | NIL | 315.3  | NIL | 326.95 | NIL | 308.33 |
| 1991 | chrSm | ?_SMC04293      | CDS | 2110798 | 2112414 | -  | 30 | 30 | ON  | 428.43 | ON  | 340.29 | NIL | 339.03 | ON  | 405.08 | NIL | 371.93 |
| 1992 | chrSm | ?_SMC04294      | CDS | 2112456 | 2113376 | -  | 30 | 30 | ON  | 388.69 | ON  | 337.17 | NIL | 311.1  | NIL | 288.22 | NIL | 270.13 |
| 1993 | chrSm | ?_SMC04295      | CDS | 2113376 | 2114372 | -  | 32 | 32 | ON  | 340.2  | ON  | 347.3  | NIL | 331.14 | NIL | 314.57 | NIL | 312.95 |
| 1994 | chrSm | ?_SMC04297      | CDS | 2114353 | 2114867 | -  | 30 | 30 | NIL | 279.93 | NIL | 255.26 | NIL | 299.53 | NIL | 267.92 | NIL | 329.01 |
| 1995 | chrSm | ?_SMC04301      | CDS | 2114864 | 2116030 | -  | 30 | 30 | NIL | 292.08 | NIL | 307.04 | NIL | 308.01 | NIL | 318.62 | NIL | 358.92 |
| 1996 | chrSm | codO:SMC04302   | CDS | 2116227 | 2116871 | -  | 30 | 30 | ON  | 359.25 | NIL | 276.09 | NIL | 352.35 | NIL | 345.81 | ON  | 374.14 |
| 1997 | chrSm | codN:SMC04303   | CDS | 2116882 | 2120709 | -  | 30 | 30 | ON  | 507    | NIL | 356.3  | NIL | 349.15 | ON  | 364.82 | ON  | 376.19 |
| 1998 | chrSm | codW:SMC04304   | CDS | 2120782 | 2121846 | -  | 30 | 30 | ON  | 778.76 | ON  | 359.82 | NIL | 348.98 | ON  | 401.13 | NIL | 349.39 |
| 1999 | chrSm | codP:SMC04305   | CDS | 2121850 | 2122377 | -  | 30 | 30 | ON  | 696.14 | ON  | 358.88 | NIL | 317.1  | NIL | 314.08 | NIL | 337.37 |

|      |       |                 |     |           |           |    |    |     |        |     |        |     |        |     |         |     |        |
|------|-------|-----------------|-----|-----------|-----------|----|----|-----|--------|-----|--------|-----|--------|-----|---------|-----|--------|
| 2000 | chrSm | 7: SMC04306     | CDS | 2123251   | 2124051 + | 30 | 30 | ON  | 345.91 | ON  | 350    | ON  | 428.66 | ON  | 400.13  | NIL | 332.54 |
| 2001 | chrSm | C9D2: SMC04307  | CDS | 2124064   | 2126241 - | 30 | 30 | NIL | 276.88 | NIL | 321.4  | NIL | 266.72 | NIL | 286.29  | NIL | 275.5  |
| 2002 | chrSm | 7: SMC04308     | CDS | 2124366   | 2127181 - | 30 | 30 | ON  | 349.01 | ON  | 386.21 | ON  | 389.37 | ON  | 370.8   | NIL | 322.04 |
| 2003 | chrSm | C6B0: SMC04309  | CDS | 2127274   | 2128728 + | 30 | 30 | ON  | 352.84 | ON  | 361.13 | ON  | 435.17 | ON  | 368.72  | NIL | 374.85 |
| 2004 | chrSm | 7: SMC04310     | CDS | 2128773   | 2129716 + | 30 | 30 | ON  | 602.4  | ON  | 425.2  | ON  | 435.12 | ON  | 403.2   | NIL | 346.84 |
| 2005 | chrSm | 7: SMC04311     | CDS | 2129580   | 2130578 + | 30 | 30 | ON  | 521.93 | ON  | 566.24 | ON  | 500.13 | ON  | 625.03  | NIL | 434.95 |
| 2006 | chrSm | 7: SMC04312     | CDS | 2130955   | 2131848 + | 30 | 30 | ON  | 394.85 | ON  | 401.51 | ON  | 376.45 | ON  | 362.27  | NIL | 343.46 |
| 2007 | chrSm | 7: SMC04313     | CDS | 2132143   | 2132307 + | 30 | 30 | ON  | 487.02 | ON  | 522.3  | ON  | 627.64 | ON  | 698.01  | NIL | 583.81 |
| 2008 | chrSm | 7: SMC04314     | CDS | 2132417   | 2132650 + | 30 | 30 | NIL | 262.89 | NIL | 247.26 | NIL | 272.59 | NIL | 250.03  | NIL | 287.2  |
| 2009 | chrSm | 7: SMC04315     | CDS | 2132726   | 2133123 - | 30 | 30 | NIL | 260.54 | NIL | 251.67 | NIL | 337.99 | NIL | 278.46  | NIL | 318.38 |
| 2010 | chrSm | 7: SMC04316     | CDS | 2133224   | 2134072 + | 30 | 30 | ON  | 376.96 | ON  | 342.53 | NIL | 337.99 | NIL | 333.47  | NIL | 348.36 |
| 2011 | chrSm | 7: SMC04317     | CDS | 2134148   | 2135161 + | 30 | 30 | ON  | 454.57 | ON  | 408.72 | NIL | 358.53 | ON  | 469.4   | ON  | 455.13 |
| 2012 | chrSm | 7: SMC04326     | CDS | 2135496   | 2136638 + | 30 | 30 | NIL | 294.83 | ON  | 339.81 | NIL | 328.31 | NIL | 315.35  | NIL | 455.17 |
| 2013 | chrSm | 7: SMC04327     | CDS | 2136677   | 2137315 - | 30 | 30 | ON  | 399.42 | ON  | 378.74 | NIL | 311.26 | NIL | 322.69  | NIL | 323.84 |
| 2014 | chrSm | 7: SMC04328     | CDS | 2137380   | 2138132 - | 30 | 30 | ON  | 347.38 | ON  | 336.91 | NIL | 291.19 | NIL | 313.32  | NIL | 292.85 |
| 2015 | chrSm | 7: SMC04329     | CDS | 21398206  | 2139970 - | 30 | 30 | ON  | 381.66 | ON  | 362.32 | NIL | 352.01 | NIL | 341.42  | NIL | 337.29 |
| 2016 | chrSm | mIB: SMC04330   | CDS | 21390718  | 2140592 - | 30 | 30 | ON  | 657.66 | ON  | 356.78 | NIL | 341.29 | NIL | 341.18  | NIL | 320.57 |
| 2017 | chrSm | mIB: SMC04331   | CDS | 21411716  | 2141874 + | 30 | 30 | ON  | 402.23 | ON  | 366.02 | NIL | 330.99 | ON  | 391.04  | NIL | 316.82 |
| 2018 | chrSm | ecrB: SMC04332  | CDS | 2141902   | 2142060 - | 30 | 30 | ON  | 375.9  | ON  | 403.04 | NIL | 281.96 | ON  | 342.01  | NIL | 340.7  |
| 2019 | chrSm | 7: SMC04333     | CDS | 2142100   | 2142720 + | 30 | 30 | ON  | 392.39 | ON  | 339.35 | NIL | 312.37 | NIL | 342.01  | NIL | 337.49 |
| 2020 | chrSm | 7: SMC04334     | CDS | 2142915   | 2143715 + | 30 | 30 | ON  | 375.72 | ON  | 362.47 | NIL | 354.51 | NIL | 331.24  | NIL | 307.36 |
| 2021 | chrSm | 7: SMC04335     | CDS | 2144024   | 2144197 + | 30 | 30 | ON  | 371.54 | ON  | 370.65 | ON  | 434.92 | ON  | 435.26  | ON  | 398.46 |
| 2022 | chrSm | 7: SMC04336     | CDS | 2144290   | 2144757 + | 30 | 30 | ON  | 484.35 | ON  | 382.47 | NIL | 339.99 | NIL | 318.09  | NIL | 338.48 |
| 2023 | chrSm | 7: SMC04337     | CDS | 2145366 + | 2145946 + | 30 | 30 | ON  | 508.6  | ON  | 351.14 | NIL | 316.95 | ON  | 389.05  | NIL | 334.96 |
| 2024 | chrSm | 7: SMC04339     | CDS | 2145359   | 2145946 + | 30 | 30 | ON  | 558.1  | NIL | 311.33 | NIL | 326.02 | NIL | 301.91  | NIL | 336.99 |
| 2025 | chrSm | 7: SMC04340     | CDS | 2145943   | 2147034 + | 30 | 30 | ON  | 554.49 | NIL | 312.63 | NIL | 357.19 | ON  | 356.4   | NIL | 336.91 |
| 2026 | chrSm | 7: SMC04342     | CDS | 2148117   | 2148171 + | 30 | 30 | ON  | 678.45 | ON  | 369.4  | NIL | 485.6  | ON  | 429.99  | NIL | 454.23 |
| 2027 | chrSm | 7: SMC04345     | CDS | 2148720   | 2148458 + | 30 | 30 | ON  | 633.18 | ON  | 375.61 | NIL | 357.19 | ON  | 358     | NIL | 454.23 |
| 2028 | chrSm | 7: SMC04347     | CDS | 2148478   | 2150529 + | 30 | 30 | ON  | 477.13 | ON  | 367.57 | NIL | 369.89 | ON  | 457.74  | ON  | 421.89 |
| 2029 | chrSm | 7: SMC04451     | CDS | 2150584   | 2151246 + | 30 | 30 | ON  | 340.02 | ON  | 354.07 | ON  | 379.5  | ON  | 351.51  | NIL | 359.84 |
| 2030 | chrSm | 7: SMC04461     | CDS | 2151324   | 2151794 - | 30 | 30 | NIL | 307.12 | ON  | 363.62 | ON  | 485.62 | ON  | 372.62  | NIL | 388.36 |
| 2031 | chrSm | 7: SMC04462     | CDS | 2152155 - | 21521826  | 30 | 30 | NIL | 233.94 | NIL | 254.1  | NIL | 573.35 | NIL | 256.3   | NIL | 260.04 |
| 2032 | chrSm | 7: SMC04463     | CDS | 2152254   | 2153150 - | 30 | 30 | NIL | 310.5  | NIL | 325.86 | ON  | 337.18 | NIL | 303.49  | NIL | 323.99 |
| 2033 | chrSm | 7: SMC04464     | CDS | 2153700   | 2153900 + | 30 | 30 | NIL | 438.43 | ON  | 904.66 | ON  | 337.18 | ON  | 1221.78 | NIL | 554    |
| 2034 | chrSm | 7: SMC04465     | CDS | 2154807   | 2154887 + | 30 | 30 | NIL | 285.89 | ON  | 419.1  | NIL | 314.2  | ON  | 338.47  | NIL | 309.94 |
| 2035 | chrSm | 7: SMC04466     | CDS | 2155123   | 2155722 + | 30 | 30 | ON  | 318.59 | ON  | 359.18 | ON  | 436.4  | ON  | 368.9   | NIL | 386.75 |
| 2036 | chrSm | 7: SMC04467     | CDS | 2156701   | 2156701 - | 32 | 32 | ON  | 405.09 | ON  | 661.65 | ON  | 521.6  | ON  | 698.5   | ON  | 500.36 |
| 2037 | chrSm | 7: SMC04468     | CDS | 2156698   | 2156940 - | 30 | 30 | ON  | 368.36 | ON  | 327.03 | NIL | 456.05 | ON  | 779.78  | NIL | 543.24 |
| 2038 | chrSm | 7: SMC04469     | CDS | 2157476   | 2158480 + | 30 | 30 | ON  | 431.97 | ON  | 379.33 | NIL | 312.68 | ON  | 368.73  | NIL | 309.21 |
| 2039 | chrSm | 7: SMC04470     | CDS | 2159494 - | 2159494 - | 30 | 30 | NIL | 402.8  | ON  | 375.6  | NIL | 308.96 | ON  | 373.24  | NIL | 301.92 |
| 2040 | chrSm | 7: SMC04471     | CDS | 2159596   | 2161242 - | 30 | 30 | NIL | 289.43 | ON  | 343.18 | NIL | 315.63 | NIL | 316.62  | NIL | 340.51 |
| 2041 | chrSm | C9A1: SMC04472  | CDS | 2161394   | 2162803 + | 30 | 30 | ON  | 353.6  | ON  | 362.87 | NIL | 352.92 | ON  | 356.6   | NIL | 374.7  |
| 2042 | chrSm | 7: SMC04473     | CDS | 2162919   | 2163378 + | 30 | 30 | NIL | 275.41 | NIL | 311.29 | NIL | 293.46 | NIL | 301.61  | NIL | 327.93 |
| 2043 | chrSm | 7: SMC04474     | CDS | 2163695   | 2163961 - | 30 | 30 | ON  | 324.76 | ON  | 341.76 | ON  | 413.23 | ON  | 408.79  | NIL | 385    |
| 2044 | chrSm | 7: SMC04475     | CDS | 2164568   | 2165209 + | 30 | 30 | ON  | 631.98 | ON  | 484.84 | ON  | 404.65 | ON  | 443.92  | ON  | 411.15 |
| 2045 | chrSm | 7: SMC04476     | CDS | 2165371   | 2167935 - | 30 | 30 | ON  | 365.93 | ON  | 340.99 | ON  | 410.98 | ON  | 402.57  | NIL | 402.58 |
| 2046 | chrSm | 7: SMC04477     | CDS | 2168529 - | 2169287 - | 30 | 30 | ON  | 325.8  | NIL | 290.11 | NIL | 316.15 | NIL | 326.94  | NIL | 311.65 |
| 2047 | chrSm | 7: SMC04478     | CDS | 2168568   | 2169287 - | 30 | 30 | ON  | 367.57 | ON  | 353.83 | ON  | 389.53 | ON  | 384.95  | NIL | 346.5  |
| 2048 | chrSm | 7: SMC04479     | CDS | 2169289   | 2171064 - | 30 | 30 | ON  | 390.41 | ON  | 380.84 | NIL | 353.43 | ON  | 391.4   | NIL | 361.03 |
| 2049 | chrSm | 7: SMC04480     | CDS | 2171337   | 2171768 + | 30 | 30 | NIL | 300.61 | ON  | 386.54 | NIL | 365.58 | ON  | 353.28  | NIL | 372.59 |
| 2050 | chrSm | 7: SMC04481     | CDS | 2171769   | 2172089 + | 30 | 30 | NIL | 279.69 | NIL | 297.2  | NIL | 328    | NIL | 430.98  | ON  | 424.54 |
| 2051 | chrSm | 7: SMC04482     | CDS | 2172279   | 2172617 - | 30 | 30 | NIL | 323.23 | NIL | 325.85 | ON  | 392.6  | ON  | 367.97  | NIL | 465.96 |
| 2052 | chrSm | 7: SMC04483     | CDS | 2172982   | 2173794 - | 30 | 30 | ON  | 319.18 | ON  | 339.87 | NIL | 269.21 | ON  | 312.8   | NIL | 380.75 |
| 2053 | chrSm | 7: SMC04485     | CDS | 2174240   | 2175082 + | 34 | 34 | ON  | 377.87 | ON  | 339.87 | NIL | 269.21 | NIL | 312.8   | NIL | 283.1  |
| 2054 | chrSm | 7: SMC04484     | CDS | 2174836   | 2174833 - | 30 | 30 | NIL | 214.99 | NIL | 235.86 | NIL | 194.65 | NIL | 203.58  | NIL | 234.64 |
| 2055 | chrSm | 7: SMC04486     | CDS | 2175172   | 2175636 - | 30 | 30 | NIL | 268.91 | NIL | 251.11 | NIL | 290.18 | NIL | 279.43  | NIL | 312.13 |
| 2056 | chrSm | 7: SMC04487     | CDS | 2175636   | 2177069 - | 30 | 30 | ON  | 365.8  | ON  | 372.71 | ON  | 499.9  | ON  | 452.1   | NIL | 371.65 |
| 2057 | chrSm | 7: SMC04488     | CDS | 2177209   | 2177550 + | 30 | 30 | NIL | 301.04 | NIL | 284.41 | NIL | 315.91 | ON  | 314.58  | NIL | 297.32 |
| 2058 | chrSm | 7: SMC04489     | CDS | 2177331   | 2177731 - | 30 | 30 | NIL | 299.26 | ON  | 338.91 | NIL | 259.74 | NIL | 316.73  | NIL | 307.61 |
| 2059 | chrSm | 7: SMC04490     | CDS | 2178070   | 2178474 + | 30 | 30 | ON  | 319.44 | ON  | 368.85 | NIL | 276.71 | ON  | 434.68  | NIL | 331.51 |
| 2060 | chrSm | 7: SMC04491     | CDS | 2178679   | 2179041 - | 30 | 30 | ON  | 337.83 | ON  | 325.3  | ON  | 424.95 | ON  | 434.68  | NIL | 396.7  |
| 2061 | chrSm | 7: SMC04494     | CDS | 2181031   | 2181228 + | 30 | 30 | NIL | 248.8  | NIL | 293.45 | NIL | 274.93 | NIL | 288.28  | NIL | 279.16 |
| 2062 | chrSm | TRN3: SMC04495  | CDS | 2181608   | 2182810 + | 66 | 0  | NIL | 442.94 | ON  | 435.92 | ON  | 378.43 | ON  | 430.89  | NIL | 348.21 |
| 2063 | chrSm | 7: SMC04440     | CDS | 2183257   | 2184086 - | 30 | 29 | NIL | 308.65 | NIL | 291.57 | NIL | 362.4  | NIL | 328.3   | NIL | 375.27 |
| 2064 | chrSm | 7: SMC04496     | CDS | 2183466   | 2184086 - | 30 | 30 | NIL | 272.63 | NIL | 252.21 | NIL | 331.56 | NIL | 284.87  | NIL | 316.47 |
| 2065 | chrSm | 7: SMC04497     | CDS | 2184278   | 2184746 - | 30 | 30 | ON  | 356.12 | NIL | 336.38 | NIL | 309.79 | ON  | 390.78  | NIL | 356.46 |
| 2066 | chrSm | 7: SMC04498     | CDS | 2184902   | 2185570 + | 30 | 30 | ON  | 356.13 | NIL | 303.74 | NIL | 309.76 | NIL | 304.35  | NIL | 292.83 |
| 2067 | chrSm | 7: SMC04499     | CDS | 2185756   | 2186088 + | 31 | 31 | NIL | 296.91 | NIL | 271.8  | NIL | 257.44 | NIL | 289.32  | NIL | 294.09 |
| 2068 | chrSm | 7: SMC04200     | CDS | 2186082   | 2186369 + | 30 | 30 | ON  | 375.57 | ON  | 359.21 | NIL | 312.47 | ON  | 389.62  | NIL | 340.18 |
| 2069 | chrSm | 7: SMC04201     | CDS | 2186385   | 2187110 - | 30 | 30 | ON  | 482.56 | ON  | 408.88 | NIL | 376.71 | ON  | 398.96  | NIL | 392.58 |
| 2070 | chrSm | 7: SMC04202     | CDS | 2187335   | 2188165 - | 30 | 30 | ON  | 482.66 | ON  | 360.98 | NIL | 374.74 | ON  | 394.97  | NIL | 337.29 |
| 2071 | chrSm | fact1: SMC04203 | CDS | 2188692   | 2189171 + | 30 | 30 | ON  | 344.44 | ON  | 325.28 | NIL | 374.35 | ON  | 427.46  | ON  | 417.21 |

|      |       |                    |      |         |         |   |    |    |     |        |     |        |     |        |     |        |     |        |
|------|-------|--------------------|------|---------|---------|---|----|----|-----|--------|-----|--------|-----|--------|-----|--------|-----|--------|
| 2072 | chrSm | febr.SMC04204      | CDS  | 2189161 | 2190205 | + | 30 | 30 | ON  | 359.93 | NIL | 322.78 | ON  | 399.69 | ON  | 341.29 | NIL | 355.72 |
| 2073 | chrSm | ?_SMC04205         | CDS  | 2190347 | 2193026 | + | 30 | 30 | ON  | 327.17 | NIL | 320.6  | ON  | 411.76 | ON  | 365.1  | NIL | 335    |
| 2074 | chrSm | ?_SMC04206         | CDS  | 2193379 | 2194179 | + | 30 | 30 | NIL | 295.33 | ON  | 357.29 | NIL | 338.24 | NIL | 324.76 | NIL | 317.09 |
| 2075 | chrSm | ?_SMC04207         | CDS  | 2194201 | 2196054 | + | 30 | 30 | ON  | 329.3  | NIL | 323.32 | ON  | 391.94 | NIL | 329.12 | NIL | 297.72 |
| 2076 | chrSm | ?_SMC04208         | CDS  | 2196041 | 2197351 | + | 30 | 30 | NIL | 300.95 | NIL | 297.94 | NIL | 369.35 | ON  | 339    | NIL | 309.04 |
| 2077 | chrSm | ?_SMC04209         | CDS  | 2197376 | 2198281 | - | 30 | 30 | ON  | 319.09 | NIL | 277.94 | NIL | 296.49 | NIL | 269.64 | NIL | 306.67 |
| 2078 | chrSm | ?_SMC04267         | CDS  | 2198528 | 2199298 | - | 30 | 30 | NIL | 266.25 | NIL | 279.5  | NIL | 279.52 | NIL | 289.03 | NIL | 332.76 |
| 2079 | chrSm | ?_SMC04441         | CDS  | 2199475 | 2199663 | + | 30 | 30 | NIL | 328.71 | ON  | 331.51 | NIL | 272.03 | NIL | 333.78 | NIL | 312.72 |
| 2080 | chrSm | ?_SMC04269         | CDS  | 2199668 | 2200129 | + | 30 | 30 | NIL | 250.03 | NIL | 261.46 | NIL | 265.69 | NIL | 261.11 | NIL | 276.69 |
| 2081 | chrSm | trNALYS-1.SMC04364 | trNA | 2200319 | 2200319 | - | 30 | 30 | NIL | 352.14 | ON  | 305.8  | NIL | 301.81 | NIL | 283.26 | NIL | 307.82 |
| 2082 | chrSm | ?_SMC04271         | CDS  | 2200448 | 2201365 | - | 30 | 30 | ON  | 348.91 | ON  | 395.03 | NIL | 357.23 | ON  | 404.18 | NIL | 318.08 |
| 2083 | chrSm | ?_SMC04272         | CDS  | 2201542 | 2202291 | - | 30 | 30 | ON  | 343.35 | ON  | 338.93 | NIL | 342.8  | ON  | 334.12 | NIL | 308.86 |
| 2084 | chrSm | ?_SMC04274         | CDS  | 2202294 | 2203400 | - | 30 | 30 | ON  | 359.54 | ON  | 369.24 | NIL | 379.54 | ON  | 367.09 | NIL | 359.05 |
| 2085 | chrSm | ?_SMC04276         | CDS  | 2203551 | 2203994 | - | 30 | 30 | ON  | 329.74 | ON  | 332.77 | NIL | 364.09 | NIL | 317.33 | NIL | 346.77 |
| 2086 | chrSm | ?_SMC04280         | CDS  | 2204782 | 2206116 | - | 30 | 30 | ON  | 328.3  | NIL | 321.81 | NIL | 370.26 | ON  | 360.11 | NIL | 327.87 |
| 2087 | chrSm | ?_SMC04283         | CDS  | 2206449 | 2208388 | - | 30 | 30 | NIL | 288.76 | NIL | 282.55 | NIL | 310.63 | NIL | 327.15 | NIL | 287.17 |
| 2088 | chrSm | ?_SMC04287         | CDS  | 2208385 | 2209086 | - | 30 | 30 | NIL | 252.72 | NIL | 285.49 | NIL | 259.67 | NIL | 257.24 | NIL | 265.09 |
| 2089 | chrSm | ?_SMC04289         | CDS  | 2209127 | 2210146 | - | 30 | 30 | NIL | 307.59 | NIL | 313.42 | NIL | 282.2  | NIL | 284.92 | NIL | 321.07 |
| 2090 | chrSm | ?_SMC04291         | CDS  | 2210543 | 2211871 | + | 30 | 30 | ON  | 340.35 | ON  | 362.94 | ON  | 396.22 | NIL | 360.58 | NIL | 316.31 |
| 2091 | chrSm | cyat3.SMC04292     | CDS  | 2212056 | 2213825 | + | 30 | 30 | ON  | 331.52 | ON  | 356.97 | NIL | 315.58 | NIL | 314.54 | ON  | 395.28 |
| 2092 | chrSm | ftsZ2.SMC04296     | CDS  | 2214116 | 2215156 | - | 30 | 30 | ON  | 692.8  | ON  | 606.23 | ON  | 463.38 | ON  | 497.76 | ON  | 395.28 |
| 2093 | chrSm | ?_SMC04298         | CDS  | 2215382 | 2215576 | + | 30 | 30 | NIL | 351.3  | ON  | 401.53 | NIL | 463.64 | ON  | 373.78 | NIL | 340.3  |
| 2094 | chrSm | ?_SMC04299         | CDS  | 2215614 | 2217326 | - | 30 | 30 | NIL | 295.44 | NIL | 311.54 | NIL | 339.69 | ON  | 352.06 | NIL | 300.38 |
| 2095 | chrSm | atuC.SMC04300      | CDS  | 2217485 | 2218525 | - | 31 | 31 | NIL | 354.59 | ON  | 424.46 | NIL | 409.96 | ON  | 363.67 | NIL | 375.77 |
| 2096 | chrSm | atUB.SMC04316      | CDS  | 2218513 | 2220549 | - | 30 | 30 | ON  | 404.99 | ON  | 373.64 | ON  | 421.97 | ON  | 385.39 | ON  | 359.24 |
| 2097 | chrSm | atUA.SMC04317      | CDS  | 2220557 | 2221537 | - | 30 | 30 | ON  | 378.33 | ON  | 740.82 | NIL | 468.56 | ON  | 697.43 | NIL | 388.72 |
| 2098 | chrSm | csr1.SMC04318      | CDS  | 2221919 | 2222128 | + | 30 | 29 | ON  | 602.17 | ON  | 353.91 | NIL | 342.81 | ON  | 343.11 | NIL | 521.67 |
| 2099 | chrSm | ?_SMC04319         | CDS  | 2222299 | 2222586 | + | 30 | 30 | ON  | 460.78 | ON  | 358.31 | ON  | 342.81 | ON  | 407.72 | ON  | 337.92 |
| 2100 | chrSm | tpuU.SMC04320      | CDS  | 2222629 | 2222865 | + | 30 | 30 | ON  | 459.63 | ON  | 358.31 | ON  | 404.23 | ON  | 373.67 | NIL | 373.67 |
| 2101 | chrSm | gslT.SMC04321      | CDS  | 2223853 | 2223853 | + | 30 | 30 | ON  | 380.57 | ON  | 459.99 | ON  | 389.3  | ON  | 403.01 | NIL | 377.35 |
| 2102 | chrSm | moaA.SMC04322      | CDS  | 2223990 | 2224939 | + | 30 | 30 | ON  | 405.68 | ON  | 469.85 | ON  | 454.72 | ON  | 473.75 | NIL | 408.17 |
| 2103 | chrSm | ?_SMC04323         | CDS  | 2225161 | 2226387 | - | 30 | 30 | NIL | 418.32 | ON  | 343.43 | NIL | 325.89 | NIL | 316.31 | NIL | 316.31 |
| 2104 | chrSm | ?_SMC04324         | CDS  | 2227062 | 2227274 | - | 30 | 30 | NIL | 276.6  | NIL | 298.85 | NIL | 329.19 | NIL | 316.39 | NIL | 306.85 |
| 2105 | chrSm | ?_SMC04338         | CDS  | 2227148 | 2228146 | - | 30 | 30 | ON  | 323.09 | ON  | 406.42 | NIL | 297.92 | ON  | 344.85 | NIL | 342.47 |
| 2106 | chrSm | ?_SMC04341         | CDS  | 2228134 | 2229078 | - | 30 | 30 | ON  | 355.51 | ON  | 480.6  | NIL | 424.36 | ON  | 482.86 | NIL | 352.41 |
| 2107 | chrSm | cyat.SMC04343      | CDS  | 2229234 | 2230187 | - | 30 | 30 | NIL | 314.87 | ON  | 367.69 | NIL | 335.83 | NIL | 327.4  | ON  | 385.78 |
| 2108 | chrSm | ?_SMC04344         | CDS  | 2230676 | 2230876 | + | 30 | 30 | NIL | 245.21 | NIL | 285.03 | NIL | 295.01 | NIL | 321.48 | NIL | 346.71 |
| 2109 | chrSm | llvC.SMC04346      | CDS  | 2230742 | 2231761 | - | 30 | 30 | NIL | 514.08 | NIL | 403.12 | NIL | 346.94 | ON  | 424.64 | NIL | 325.28 |
| 2110 | chrSm | ?_SMC04348         | CDS  | 2232467 | 2232467 | - | 30 | 30 | NIL | 270.66 | NIL | 425.44 | NIL | 264.5  | NIL | 260.7  | NIL | 259.57 |
| 2111 | chrSm | ?_SMC04350         | CDS  | 2232766 | 2234031 | + | 30 | 30 | ON  | 326.32 | ON  | 332.95 | NIL | 376.27 | NIL | 348.64 | NIL | 372    |
| 2112 | chrSm | ?_SMC04351         | CDS  | 2234040 | 2235983 | + | 30 | 30 | ON  | 312.26 | ON  | 334.05 | NIL | 306.27 | NIL | 277.48 | NIL | 312.57 |
| 2113 | chrSm | ?_SMC04352         | CDS  | 2236041 | 2236631 | - | 30 | 30 | ON  | 630.93 | ON  | 691.35 | ON  | 434.27 | ON  | 701    | ON  | 451.04 |
| 2114 | chrSm | ?_SMC04357         | CDS  | 2236802 | 2237503 | + | 30 | 30 | NIL | 246.53 | NIL | 257.39 | NIL | 266.35 | ON  | 266.35 | NIL | 277.88 |
| 2115 | chrSm | ?_SMC04359         | CDS  | 2237867 | 2238562 | + | 30 | 30 | ON  | 375.31 | ON  | 379.22 | ON  | 416.86 | ON  | 457.58 | NIL | 366.71 |
| 2116 | chrSm | ?_SMC04360         | CDS  | 2238598 | 2239497 | - | 30 | 30 | NIL | 316.59 | ON  | 343.96 | NIL | 317.07 | NIL | 319.02 | ON  | 339.07 |
| 2117 | chrSm | ?_SMC04361         | CDS  | 2239651 | 2240310 | - | 31 | 31 | NIL | 371.63 | ON  | 373.5  | ON  | 395.83 | ON  | 351.16 | NIL | 389.93 |
| 2118 | chrSm | ?_SMC04362         | CDS  | 2240307 | 2241755 | - | 30 | 30 | ON  | 351.5  | ON  | 344.75 | NIL | 354.3  | NIL | 323.11 | NIL | 337.89 |
| 2119 | chrSm | ?_SMC04363         | CDS  | 2242227 | 2243069 | - | 30 | 30 | ON  | 319.5  | ON  | 344.15 | NIL | 336.72 | ON  | 366.71 | NIL | 367.11 |
| 2120 | chrSm | ndh.SMC04452       | CDS  | 224354  | 2244422 | - | 30 | 30 | ON  | 318.78 | ON  | 493.14 | ON  | 433.91 | NIL | 376.6  | ON  | 445.62 |
| 2121 | chrSm | ?_SMC04403         | CDS  | 2244554 | 2245018 | - | 30 | 30 | ON  | 324.51 | NIL | 305.88 | NIL | 326.93 | NIL | 309.54 | NIL | 305.52 |
| 2122 | chrSm | ?_SMC04404         | CDS  | 2245222 | 2245926 | - | 30 | 30 | ON  | 371.48 | ON  | 354.47 | NIL | 351.18 | NIL | 369.81 | NIL | 324.74 |
| 2123 | chrSm | ?_SMC04493         | CDS  | 2246040 | 2246510 | - | 30 | 30 | NIL | 291.56 | ON  | 342.47 | NIL | 309.8  | NIL | 318.34 | NIL | 313.1  |
| 2124 | chrSm | ?_SMC04405         | CDS  | 2246675 | 2247562 | + | 30 | 30 | NIL | 429.65 | ON  | 359.09 | ON  | 405.88 | ON  | 417.39 | NIL | 329.79 |
| 2125 | chrSm | ?_SMC04488         | CDS  | 2247640 | 2247981 | - | 30 | 30 | ON  | 310.02 | NIL | 312.39 | NIL | 256.73 | NIL | 302.83 | NIL | 338.85 |
| 2126 | chrSm | ?_SMC04406         | CDS  | 2249667 | 2249667 | - | 30 | 30 | ON  | 384.2  | ON  | 444.61 | NIL | 372.72 | ON  | 385.99 | NIL | 351.77 |
| 2127 | chrSm | pdxU.SMC01407      | CDS  | 2249854 | 2250606 | - | 30 | 30 | ON  | 575.57 | ON  | 619.23 | ON  | 510.26 | ON  | 542.88 | ON  | 493.54 |
| 2128 | chrSm | ?_SMC04408         | CDS  | 2250801 | 2251511 | + | 30 | 30 | ON  | 351.51 | ON  | 371.91 | ON  | 472.92 | ON  | 501.2  | NIL | 397.65 |
| 2129 | chrSm | ?_SMC04409         | CDS  | 2251742 | 2252848 | + | 30 | 30 | ON  | 365.79 | ON  | 392.5  | NIL | 316.59 | NIL | 340.24 | NIL | 310.96 |
| 2130 | chrSm | ?_SMC04410         | CDS  | 2253179 | 2253418 | + | 30 | 30 | ON  | 446.13 | ON  | 465.29 | ON  | 429.12 | ON  | 429.12 | NIL | 397.8  |
| 2131 | chrSm | ?_SMC04489         | CDS  | 2253436 | 2253789 | + | 30 | 30 | NIL | 301.44 | ON  | 341.14 | NIL | 333.63 | ON  | 350.7  | NIL | 354.18 |
| 2132 | chrSm | ?_SMC04490         | CDS  | 2254506 | 2254506 | - | 30 | 30 | NIL | 317.17 | ON  | 404.52 | NIL | 270.46 | ON  | 346.84 | NIL | 265.4  |
| 2133 | chrSm | ?_SMC04411         | CDS  | 2254528 | 2255712 | - | 30 | 30 | ON  | 323.61 | ON  | 347.99 | NIL | 339.45 | NIL | 330.1  | NIL | 308.83 |
| 2134 | chrSm | ?_SMC04412         | CDS  | 2255476 | 2256528 | - | 30 | 30 | NIL | 306.39 | NIL | 321.82 | NIL | 343.01 | ON  | 333.07 | ON  | 379.36 |
| 2135 | chrSm | ?_SMC04413         | CDS  | 2256536 | 2257765 | - | 31 | 31 | NIL | 374.5  | ON  | 375.21 | NIL | 352.82 | ON  | 372.87 | NIL | 321.06 |
| 2136 | chrSm | ?_SMC04491         | CDS  | 2257749 | 2260888 | - | 30 | 30 | ON  | 390.22 | ON  | 379.79 | ON  | 405.96 | ON  | 375.27 | NIL | 380.71 |
| 2137 | chrSm | suhR.SMC01492      | CDS  | 2261213 | 2262114 | + | 30 | 30 | ON  | 329.75 | ON  | 376.54 | NIL | 340.82 | NIL | 315.42 | NIL | 356.64 |
| 2138 | chrSm | ?_SMC04414         | CDS  | 2263448 | 2264580 | - | 30 | 30 | ON  | 373.2  | NIL | 320.23 | NIL | 303.9  | NIL | 318.7  | NIL | 317.98 |
| 2139 | chrSm | brbB.SMC01415      | CDS  | 2264726 | 2265814 | + | 30 | 30 | ON  | 350.76 | NIL | 320.23 | NIL | 309.64 | NIL | 319.71 | NIL | 320.83 |
| 2140 | chrSm | ?_SMC04416         | CDS  | 2265821 | 2266180 | - | 30 | 30 | ON  | 386.9  | ON  | 454.44 | NIL | 292.73 | ON  | 315.41 | NIL | 315.41 |
| 2141 | chrSm | ?_SMC04417         | CDS  | 2266255 | 2266422 | + | 30 | 30 | NIL | 266.57 | NIL | 303.35 | NIL | 260.63 | NIL | 259.23 | NIL | 282.53 |
| 2142 | chrSm | ?_SMC04418         | CDS  | 2266715 | 2267089 | + | 31 | 31 | ON  | 319.04 | NIL | 312.39 | NIL | 304.25 | ON  | 327.22 | NIL | 332.18 |
| 2143 | chrSm | ppe1.SMC01419      | CDS  | 2267073 | 2267627 | + | 30 | 30 | NIL | 267.81 | NIL | 277.23 | NIL | 385.03 | NIL | 320.3  | NIL | 308.28 |

|            |                  |     |           |           |    |    |     |         |     |         |     |        |     |         |     |        |
|------------|------------------|-----|-----------|-----------|----|----|-----|---------|-----|---------|-----|--------|-----|---------|-----|--------|
| 2144 chrSm | ?_SMC01420       | CDS | 2267624   | 2268241 + | 30 | 30 | ON  | 401.97  | ON  | 403.43  | ON  | 390.94 | ON  | 399.6   | NIL | 350.19 |
| 2145 chrSm | ?_SMC01421       | CDS | 2268432   | 2268432 + | 30 | 30 | NIL | 279.92  | NIL | 302.07  | NIL | 364.59 | ON  | 347.46  | NIL | 311.47 |
| 2146 chrSm | ?_SMC01422       | CDS | 2268452   | 2268838 - | 32 | 32 | ON  | 434.15  | ON  | 502.3   | ON  | 435.47 | ON  | 429.89  | NIL | 467.53 |
| 2147 chrSm | mirB_SMC01423    | CDS | 2268825   | 2269484 - | 31 | 31 | ON  | 366.58  | ON  | 401.11  | NIL | 367.67 | ON  | 366.98  | NIL | 328.56 |
| 2148 chrSm | mirB_SMC01424    | CDS | 2269481   | 2270122 - | 30 | 30 | ON  | 413.99  | ON  | 392.19  | ON  | 456.38 | ON  | 498.99  | ON  | 495.07 |
| 2149 chrSm | ?_SMC01425       | CDS | 2270183 - | 2270783 - | 30 | 30 | ON  | 397.87  | ON  | 327.37  | NIL | 321.55 | ON  | 351.42  | NIL | 338.01 |
| 2150 chrSm | ?_SMC01426       | CDS | 2271369   | 2272097 + | 30 | 30 | ON  | 389.25  | ON  | 365.28  | ON  | 374.39 | ON  | 373.39  | NIL | 340.25 |
| 2151 chrSm | ?_SMC01427       | CDS | 2272581   | 2272790 - | 30 | 30 | ON  | 382.33  | NIL | 306.56  | ON  | 431.56 | ON  | 384.62  | NIL | 359.6  |
| 2152 chrSm | cpaA2_SMC01428   | CDS | 2272581   | 2272790 - | 30 | 29 | ON  | 1141.79 | ON  | 747.62  | ON  | 569.49 | ON  | 897.3   | NIL | 761.24 |
| 2153 chrSm | ?_SMC01429       | CDS | 2273101   | 2273946 + | 30 | 30 | ON  | 407.86  | ON  | 405.77  | NIL | 324.61 | ON  | 431.52  | NIL | 361.13 |
| 2154 chrSm | llyH_SMC01430    | CDS | 2274156   | 2274728 - | 30 | 30 | ON  | 564.37  | ON  | 441.53  | ON  | 381.62 | ON  | 388.22  | NIL | 356.59 |
| 2155 chrSm | llyH_SMC01431    | CDS | 2274751   | 2276529 - | 30 | 30 | ON  | 608.04  | ON  | 481.83  | ON  | 469.11 | ON  | 512.77  | NIL | 451.23 |
| 2156 chrSm | ?_SMC01432       | CDS | 2276877   | 2278913 + | 30 | 30 | ON  | 320.31  | ON  | 342.66  | NIL | 300.68 | NIL | 318.49  | NIL | 330.26 |
| 2157 chrSm | ?_SMC01433       | CDS | 2279026   | 2279976 + | 30 | 30 | NIL | 298.56  | NIL | 296.39  | NIL | 325.79 | NIL | 294.28  | NIL | 327.16 |
| 2158 chrSm | ?_SMC01434       | CDS | 2279924   | 2279864 + | 30 | 30 | NIL | 295.22  | NIL | 326.3   | ON  | 380.84 | ON  | 343     | NIL | 312.16 |
| 2159 chrSm | mirA_SMC01435    | CDS | 2280892   | 2280893 - | 30 | 30 | ON  | 343.1   | ON  | 343.46  | NIL | 349.07 | ON  | 368.59  | NIL | 341.84 |
| 2160 chrSm | serB_SMC01494    | CDS | 2280892   | 2281779 + | 30 | 30 | ON  | 368.24  | ON  | 330.95  | NIL | 334.13 | ON  | 368.48  | NIL | 291.06 |
| 2161 chrSm | ?_SMC01437       | CDS | 2281776   | 2282351 + | 30 | 30 | ON  | 364.28  | ON  | 333.01  | NIL | 322.86 | NIL | 296     | NIL | 337.9  |
| 2162 chrSm | degP2_SMC01438   | CDS | 2282351   | 2283894 - | 30 | 30 | ON  | 353.74  | ON  | 371.23  | NIL | 366.91 | ON  | 377.69  | NIL | 376.94 |
| 2163 chrSm | ?_SMC01439       | CDS | 2284104   | 2284490 - | 30 | 30 | ON  | 345.43  | ON  | 340.55  | NIL | 321.47 | NIL | 293.86  | NIL | 327.84 |
| 2164 chrSm | hflC_SMC01440    | CDS | 2285621 - | 2285621 - | 31 | 31 | ON  | 666.73  | ON  | 621.99  | ON  | 515.52 | ON  | 511.77  | ON  | 472.87 |
| 2165 chrSm | hflK_SMC01441    | CDS | 2285618   | 2286706 - | 30 | 30 | ON  | 599.65  | ON  | 532.59  | ON  | 472.66 | ON  | 476.21  | ON  | 418.92 |
| 2166 chrSm | folA_SMC01442    | CDS | 2286901   | 2287443 - | 30 | 30 | ON  | 332.11  | ON  | 350.08  | NIL | 363.15 | ON  | 392.85  | NIL | 322.67 |
| 2167 chrSm | gstB_SMC01443    | CDS | 2287457   | 2288062 - | 30 | 30 | ON  | 327.6   | ON  | 345.83  | NIL | 327.07 | NIL | 312.43  | NIL | 296.11 |
| 2168 chrSm | thyA_SMC01444    | CDS | 2288124   | 2288918 - | 30 | 30 | ON  | 422.46  | ON  | 412.96  | NIL | 371.44 | ON  | 348.08  | NIL | 344.06 |
| 2169 chrSm | ?_SMC01445       | CDS | 2289072   | 2289290 - | 30 | 30 | ON  | 317.39  | ON  | 352.34  | ON  | 581.17 | ON  | 427.78  | NIL | 437.59 |
| 2170 chrSm | ?_SMC01446       | CDS | 2289343   | 2289585 - | 30 | 30 | ON  | 336.33  | ON  | 379.43  | ON  | 438.52 | ON  | 407.87  | ON  | 421.04 |
| 2171 chrSm | ?_SMC01447       | CDS | 2289596   | 2289802 - | 30 | 30 | ON  | 379.31  | ON  | 357.93  | ON  | 502.06 | ON  | 441.04  | ON  | 426.7  |
| 2172 chrSm | ?_SMC01448       | CDS | 2290085   | 2290531 + | 30 | 30 | NIL | 290.67  | NIL | 305.89  | NIL | 342.84 | NIL | 317.25  | NIL | 338.47 |
| 2173 chrSm | ?_SMC01449       | CDS | 2290531   | 2290954 - | 30 | 30 | ON  | 407.07  | ON  | 1037.13 | ON  | 378.97 | ON  | 780.28  | ON  | 392.65 |
| 2175 chrSm | ?_SMC01450       | CDS | 2292181 + | 2292181 + | 30 | 30 | ON  | 543.55  | ON  | 445.31  | NIL | 332.2  | ON  | 392.97  | NIL | 358.4  |
| 2176 chrSm | ?_SMC01451       | CDS | 2292418 + | 2292418 + | 30 | 30 | ON  | 597.38  | ON  | 453.14  | ON  | 455.64 | ON  | 467.62  | ON  | 451.26 |
| 2177 chrSm | ?_SMC01451       | CDS | 2292501   | 2292743 + | 30 | 30 | ON  | 354.41  | ON  | 325.75  | ON  | 381.47 | ON  | 354.92  | ON  | 381.41 |
| 2178 chrSm | Trm22-4_SMC01453 | CDS | 2293220   | 2294383 + | 49 | 0  | ON  | 459.79  | ON  | 423.01  | ON  | 432.47 | ON  | 393.61  | ON  | 424.86 |
| 2179 chrSm | ?_SMC01454       | CDS | 2294698   | 2298402 - | 30 | 30 | ON  | 449.29  | ON  | 382.26  | ON  | 409.32 | ON  | 439.89  | NIL | 432.99 |
| 2180 chrSm | did_SMC01455     | CDS | 2298503   | 2299909 - | 30 | 30 | ON  | 416.78  | ON  | 372.9   | NIL | 261.06 | NIL | 381.39  | NIL | 354.78 |
| 2181 chrSm | ?_SMC01456       | CDS | 2300353   | 2300787 + | 30 | 30 | NIL | 304.58  | ON  | 372.3   | NIL | 320.93 | NIL | 290.17  | NIL | 309.93 |
| 2182 chrSm | ?_SMC01457       | CDS | 2300845   | 2303979 - | 30 | 30 | ON  | 475.02  | ON  | 391.97  | NIL | 349.14 | ON  | 351.05  | NIL | 339.56 |
| 2183 chrSm | ?_SMC01458       | CDS | 2303976   | 2305172 - | 30 | 30 | ON  | 405.63  | ON  | 352.43  | NIL | 376.55 | ON  | 363.92  | NIL | 373.55 |
| 2184 chrSm | ?_SMC01459       | CDS | 2305674   | 2306297 + | 30 | 30 | ON  | 328.6   | ON  | 458.14  | NIL | 357.31 | ON  | 410.85  | NIL | 341.09 |
| 2185 chrSm | ?_SMC01460       | CDS | 2306724 + | 2306724 + | 30 | 30 | NIL | 242.23  | ON  | 394.72  | NIL | 282.72 | NIL | 312.17  | NIL | 316.8  |
| 2186 chrSm | uvrD1_SMC01461   | CDS | 2306850   | 2309423 + | 30 | 30 | ON  | 497.08  | ON  | 399.32  | ON  | 430.15 | ON  | 482.87  | ON  | 409.78 |
| 2187 chrSm | ?_SMC01462       | CDS | 2309934 - | 2309934 - | 30 | 30 | ON  | 325.26  | ON  | 414.03  | NIL | 356.43 | NIL | 389.58  | NIL | 363.25 |
| 2188 chrSm | ?_SMC01463       | CDS | 2309971   | 2310681 - | 30 | 30 | NIL | 295.02  | NIL | 270.29  | NIL | 320.92 | ON  | 270.62  | NIL | 331.48 |
| 2190 chrSm | ?_SMC01464       | CDS | 2310804   | 2312084 + | 30 | 30 | ON  | 373.77  | ON  | 374.4   | NIL | 320.92 | ON  | 386.5   | NIL | 325.01 |
| 2191 chrSm | creA_SMC01465    | CDS | 2312188   | 2312685 + | 30 | 30 | ON  | 313.08  | NIL | 290.26  | ON  | 276.67 | NIL | 306.11  | NIL | 300.76 |
| 2192 chrSm | Trm21-1_SMC01466 | CDS | 2313447   | 2314523 + | 31 | 0  | ON  | 603.26  | ON  | 433.89  | ON  | 437.66 | ON  | 457.59  | NIL | 410.95 |
| 2193 chrSm | cheW2_SMC01468   | CDS | 2315403   | 2315040 - | 30 | 30 | ON  | 359.46  | ON  | 362.99  | NIL | 281.65 | NIL | 324.78  | NIL | 286.46 |
| 2194 chrSm | mcpW_SMC01469    | CDS | 2315870   | 2315873 - | 31 | 31 | ON  | 372.95  | NIL | 307.33  | NIL | 293.21 | ON  | 366.77  | NIL | 330.1  |
| 2195 chrSm | 2195 chrSm       | CDS | 2317939 - | 2317939 - | 30 | 30 | ON  | 370.51  | NIL | 318.04  | NIL | 343.72 | ON  | 376.91  | NIL | 381.37 |
| 2196 chrSm | ?_SMC01470       | CDS | 2318190   | 2318348 + | 30 | 30 | ON  | 463.91  | ON  | 410.46  | NIL | 295.07 | ON  | 424.07  | ON  | 355.52 |
| 2197 chrSm | serG_SMC01471    | CDS | 2318496   | 2319095 + | 30 | 30 | ON  | 509.27  | ON  | 510.04  | NIL | 353.77 | ON  | 483.18  | NIL | 381.37 |
| 2198 chrSm | prnA_SMC01472    | CDS | 2319257   | 2320132 + | 30 | 30 | NIL | 279.48  | NIL | 314.73  | NIL | 325.86 | NIL | 320.85  | NIL | 334.19 |
| 2199 chrSm | ?_SMC01483       | CDS | 2320134   | 2320295 - | 30 | 30 | NIL | 251.07  | NIL | 251.07  | NIL | 324.33 | NIL | 299.19  | NIL | 324.67 |
| 2200 chrSm | ?_SMC01485       | CDS | 2321566   | 2323401 + | 30 | 30 | ON  | 410.26  | ON  | 485.47  | ON  | 426.86 | ON  | 488.07  | NIL | 363.86 |
| 2201 chrSm | ?_SMC01484       | CDS | 2323859   | 2323828 - | 30 | 30 | NIL | 312.8   | ON  | 360.03  | NIL | 271.71 | ON  | 352.44  | NIL | 313.97 |
| 2202 chrSm | ?_SMC01483       | CDS | 2323945   | 2324253 - | 30 | 30 | NIL | 373.31  | NIL | 302.6   | NIL | 336.43 | NIL | 310.53  | NIL | 332.87 |
| 2203 chrSm | ?_SMC01482       | CDS | 2324257   | 2324973 - | 30 | 30 | ON  | 443.87  | ON  | 341.42  | NIL | 317.51 | ON  | 386.56  | NIL | 347.05 |
| 2204 chrSm | panB_SMC01481    | CDS | 2325178   | 2325999 - | 30 | 30 | ON  | 497.4   | ON  | 446.19  | NIL | 362.77 | ON  | 535.17  | NIL | 381.7  |
| 2205 chrSm | panC_SMC01880    | CDS | 2326072   | 2326877 - | 30 | 30 | ON  | 415.8   | ON  | 381.17  | NIL | 318.74 | ON  | 409.78  | NIL | 333.44 |
| 2206 chrSm | ?_SMC01879       | CDS | 2327216   | 2327620 + | 30 | 30 | NIL | 298.94  | ON  | 381.17  | NIL | 297.64 | NIL | 311.29  | NIL | 311.84 |
| 2207 chrSm | llyA_SMC01878    | CDS | 2327922   | 2330075 - | 30 | 30 | ON  | 385.25  | ON  | 425.31  | ON  | 426.44 | ON  | 424.51  | NIL | 378.43 |
| 2208 chrSm | recN_SMC01877    | CDS | 2330174   | 2331847 - | 30 | 30 | ON  | 428.56  | ON  | 378.82  | ON  | 389.32 | ON  | 385.8   | NIL | 357.38 |
| 2209 chrSm | ?_SMC01876       | CDS | 2331884   | 2332750 - | 30 | 30 | ON  | 761.76  | ON  | 562.84  | ON  | 464.17 | ON  | 532.41  | ON  | 470.65 |
| 2210 chrSm | lpxC_SMC01875    | CDS | 2333017   | 2333985 - | 30 | 30 | ON  | 419.53  | ON  | 761.76  | ON  | 499    | ON  | 515.38  | ON  | 466.66 |
| 2211 chrSm | ftsZ1_SMC01874   | CDS | 2334394   | 2334766 - | 30 | 30 | ON  | 1138.2  | ON  | 1238.28 | ON  | 640.69 | ON  | 1106.73 | ON  | 633.06 |
| 2212 chrSm | ftsA_SMC01873    | CDS | 2337588 - | 2337588 - | 30 | 30 | ON  | 637.53  | ON  | 579.79  | ON  | 486.98 | ON  | 563.93  | ON  | 453.56 |
| 2213 chrSm | ftsQ_SMC01872    | CDS | 2337585   | 2338514 - | 30 | 30 | ON  | 480.23  | ON  | 424.07  | ON  | 426.82 | ON  | 486.98  | ON  | 453.74 |
| 2214 chrSm | ddiB_SMC01871    | CDS | 2338502   | 2339428 - | 30 | 30 | ON  | 549.95  | ON  | 550.58  | ON  | 404.21 | ON  | 400.32  | NIL | 370.24 |
| 2215 chrSm | apqZ1_SMC01870   | CDS | 2339732   | 2340425 - | 30 | 30 | ON  | 322.63  | ON  | 580.31  | NIL | 334.18 | ON  | 345.53  | NIL | 336.3  |
| 2216 chrSm | ?_SMC01869       | CDS | 2340828   | 2342138 + | 30 | 30 | ON  | 384.69  | ON  | 483.48  | NIL | 323.63 | NIL | 327.09  | NIL | 359.8  |
| 2217 chrSm | muB_SMC01868     | CDS | 2342211   | 2343185 - | 30 | 30 | ON  | 580.27  | ON  | 499.18  | ON  | 531.74 | ON  | 516.4   | ON  | 474    |

|      |       |                 |     |         |           |    |    |     |         |     |         |     |        |     |        |     |        |
|------|-------|-----------------|-----|---------|-----------|----|----|-----|---------|-----|---------|-----|--------|-----|--------|-----|--------|
| 2217 | chrSm | murC:SMC01867   | CDS | 2343182 | 2344597 - | 30 | 30 | ON  | 458.9   | ON  | 395.13  | NIL | 325.65 | NIL | 318.19 | NIL | 323.67 |
| 2218 | chrSm | murG:SMC01866   | CDS | 2344594 | 2345718 - | 30 | 30 | ON  | 470.77  | ON  | 372.44  | NIL | 360.02 | ON  | 365.91 | NIL | 356.6  |
| 2219 | chrSm | ftsW:SMC01865   | CDS | 2345722 | 2346975 - | 30 | 30 | ON  | 381.5   | ON  | 377.54  | ON  | 381.09 | ON  | 363.43 | ON  | 401.55 |
| 2220 | chrSm | muD:SMC01864    | CDS | 2346934 | 2348925 - | 30 | 30 | ON  | 498.17  | ON  | 438.43  | ON  | 501.31 | ON  | 452.97 | ON  | 415.56 |
| 2221 | chrSm | mrhA:SMC01863   | CDS | 2348932 | 2349432 - | 30 | 30 | ON  | 467.28  | ON  | 377.07  | NIL | 335.03 | ON  | 350.94 | NIL | 338.26 |
| 2222 | chrSm | muF:SMC01862    | CDS | 2349674 | 2351107 - | 30 | 30 | ON  | 439.65  | ON  | 441.17  | NIL | 374.68 | ON  | 431.46 | ON  | 409.98 |
| 2223 | chrSm | muE:SMC01861    | CDS | 2351109 | 2352569 - | 30 | 30 | ON  | 447.84  | ON  | 352.52  | NIL | 382.38 | ON  | 374.02 | NIL | 374.73 |
| 2224 | chrSm | ftsI:SMC01860   | CDS | 2352736 | 2354484 - | 30 | 30 | ON  | 455.65  | ON  | 466.47  | NIL | 360.04 | ON  | 439.42 | NIL | 409.42 |
| 2225 | chrSm | ?               | CDS | 2354487 | 2354879 - | 30 | 30 | ON  | 629.35  | ON  | 566.92  | NIL | 382.33 | ON  | 490.81 | NIL | 401.44 |
| 2226 | chrSm | ?               | CDS | 2354886 | 2355911 - | 30 | 30 | ON  | 475.81  | ON  | 1329.27 | ON  | 362.09 | ON  | 361.69 | NIL | 342.76 |
| 2227 | chrSm | ?               | CDS | 2355926 | 2356366 - | 30 | 30 | ON  | 1329.27 | ON  | 1146.95 | ON  | 452.16 | ON  | 574.85 | ON  | 510.81 |
| 2228 | chrSm | ?               | CDS | 2358437 | 2358937 - | 30 | 30 | ON  | 499.75  | ON  | 397.38  | ON  | 444.15 | ON  | 458.67 | ON  | 423.8  |
| 2229 | chrSm | ?               | CDS | 2357250 | 2358575 - | 30 | 30 | ON  | 321.34  | NIL | 329.84  | ON  | 381.08 | ON  | 363.84 | NIL | 327.98 |
| 2230 | chrSm | ?               | CDS | 2359113 | 2359714 - | 30 | 30 | ON  | 327.01  | NIL | 275.9   | NIL | 315.09 | NIL | 303.91 | NIL | 377.46 |
| 2231 | chrSm | ?               | CDS | 2360101 | 2360808 - | 30 | 30 | ON  | 445.9   | ON  | 364.45  | NIL | 335.42 | NIL | 319.91 | NIL | 332.82 |
| 2232 | chrSm | rkf:SMC01852    | CDS | 2361151 | 2362345 + | 30 | 30 | ON  | 490.69  | ON  | 445.91  | ON  | 422.26 | ON  | 468.92 | NIL | 398.94 |
| 2233 | chrSm | ?               | CDS | 2362503 | 2363138 + | 30 | 30 | NIL | 308.17  | ON  | 339.06  | ON  | 389.52 | ON  | 371.03 | NIL | 343.32 |
| 2234 | chrSm | ?               | CDS | 2363271 | 2364272 + | 30 | 30 | ON  | 543.28  | ON  | 649.17  | ON  | 500.58 | ON  | 599.93 | ON  | 447.73 |
| 2235 | chrSm | ?               | CDS | 2364310 | 2365671 - | 30 | 30 | ON  | 338.24  | ON  | 357.62  | ON  | 390.27 | ON  | 378.21 | NIL | 330.35 |
| 2236 | chrSm | ?               | CDS | 2366015 | 2367265 + | 30 | 30 | ON  | 321.51  | NIL | 318.13  | NIL | 314.26 | NIL | 306.1  | NIL | 316.86 |
| 2237 | chrSm | ?               | CDS | 2367262 | 2367927 + | 30 | 30 | NIL | 286.24  | NIL | 272.47  | NIL | 16.21  | NIL | 312.09 | NIL | 293.54 |
| 2238 | chrSm | ?               | CDS | 2368874 | 2370228 + | 30 | 30 | ON  | 395.64  | ON  | 503.89  | ON  | 413.72 | ON  | 487.37 | NIL | 362.7  |
| 2239 | chrSm | ?               | CDS | 2369011 | 2370228 + | 30 | 30 | ON  | 406.3   | ON  | 403.53  | ON  | 388.45 | ON  | 323.64 | ON  | 387.24 |
| 2240 | chrSm | ?               | CDS | 2370399 | 2371343 + | 30 | 30 | ON  | 318.27  | ON  | 325.02  | NIL | 279.72 | NIL | 323.64 | ON  | 311.65 |
| 2241 | chrSm | meiF:SMC01843   | CDS | 2371885 | 2372826 - | 30 | 30 | ON  | 408.43  | ON  | 375.52  | NIL | 369.21 | ON  | 453.05 | ON  | 413.85 |
| 2242 | chrSm | ?               | CDS | 2372829 | 2373851 - | 30 | 30 | ON  | 369.06  | ON  | 370.59  | ON  | 378.39 | ON  | 455.12 | ON  | 401.61 |
| 2243 | chrSm | ?               | CDS | 2374422 | 2375891 - | 30 | 30 | ON  | 623.57  | ON  | 465.73  | NIL | 335.22 | ON  | 388.08 | NIL | 371.87 |
| 2244 | chrSm | ?               | CDS | 2376018 | 2376785 - | 30 | 30 | NIL | 318.99  | ON  | 346.48  | NIL | 347.43 | ON  | 308.31 | NIL | 343.69 |
| 2245 | chrSm | ?               | CDS | 2376977 | 2377921 + | 30 | 30 | ON  | 397.33  | ON  | 375.52  | ON  | 380.81 | ON  | 378.12 | NIL | 323.93 |
| 2246 | chrSm | ?               | CDS | 2378871 | 2378871 + | 30 | 30 | NIL | 287.37  | NIL | 306.19  | NIL | 265.31 | NIL | 267.14 | NIL | 284.56 |
| 2247 | chrSm | lvc:SMC04455    | CDS | 2378906 | 2380552 + | 30 | 30 | ON  | 364.29  | ON  | 386.79  | ON  | 437.23 | NIL | 416.49 | NIL | 380.85 |
| 2248 | chrSm | ?               | CDS | 2381048 | 2381386 - | 30 | 30 | NIL | 259.8   | NIL | 245.66  | NIL | 236.2  | NIL | 235.1  | NIL | 275.18 |
| 2249 | chrSm | ?               | CDS | 2381459 | 2382295 - | 30 | 30 | ON  | 384.73  | ON  | 422.92  | ON  | 399.09 | ON  | 388.2  | NIL | 336.02 |
| 2250 | chrSm | ?               | CDS | 2382505 | 2383256 + | 30 | 30 | ON  | 408.16  | ON  | 432.77  | ON  | 407.86 | ON  | 451.48 | ON  | 395.66 |
| 2251 | chrSm | ?               | CDS | 2384057 | 2385346 + | 30 | 30 | ON  | 405.15  | ON  | 346.55  | NIL | 329.05 | ON  | 348.54 | NIL | 367.43 |
| 2252 | chrSm | ?               | CDS | 2385374 | 2386090 - | 30 | 30 | ON  | 419.81  | ON  | 431.94  | NIL | 346.03 | ON  | 359.16 | NIL | 337.27 |
| 2253 | chrSm | ?               | CDS | 2386299 | 2387444 - | 31 | 31 | ON  | 735.69  | ON  | 644.54  | ON  | 394.56 | ON  | 626.29 | ON  | 408.54 |
| 2254 | chrSm | ?               | CDS | 2387441 | 2388826 - | 30 | 30 | ON  | 449.45  | ON  | 393.45  | NIL | 364.24 | ON  | 448.63 | NIL | 330    |
| 2255 | chrSm | ?               | CDS | 2389024 | 2390388 - | 30 | 30 | ON  | 384.87  | ON  | 372.68  | NIL | 367.55 | ON  | 418.03 | ON  | 389.59 |
| 2256 | chrSm | ?               | CDS | 2390287 | 2392028 - | 30 | 30 | ON  | 391.57  | ON  | 559.71  | NIL | 344.71 | ON  | 517.42 | ON  | 404.93 |
| 2257 | chrSm | ?               | CDS | 2392131 | 2392910 - | 30 | 30 | ON  | 343.79  | ON  | 333.32  | NIL | 359.76 | ON  | 397.37 | NIL | 354.8  |
| 2258 | chrSm | ?               | CDS | 2393081 | 2393959 + | 30 | 30 | ON  | 469.32  | ON  | 408.18  | NIL | 342.81 | ON  | 395.36 | NIL | 348.49 |
| 2259 | chrSm | ?               | CDS | 2394145 | 2395248 + | 30 | 30 | ON  | 481.09  | ON  | 394.97  | NIL | 361.13 | ON  | 458.26 | NIL | 318.86 |
| 2260 | chrSm | ?               | CDS | 2395407 | 2396207 + | 30 | 30 | ON  | 389.1   | ON  | 353.54  | NIL | 305.7  | ON  | 343.25 | NIL | 334.23 |
| 2261 | chrSm | ?               | CDS | 2396204 | 2396992 + | 30 | 30 | ON  | 357.4   | ON  | 349.02  | NIL | 291.24 | ON  | 360.07 | NIL | 324.57 |
| 2262 | chrSm | ?               | CDS | 2396997 | 2398058 + | 30 | 30 | ON  | 389.1   | ON  | 382.98  | NIL | 361.79 | ON  | 360.15 | NIL | 345.54 |
| 2263 | chrSm | rhbH2:SMC01609  | CDS | 2398374 | 2398901 + | 30 | 30 | ON  | 553.06  | ON  | 406.52  | NIL | 295.05 | ON  | 373.93 | NIL | 346.73 |
| 2264 | chrSm | ?               | CDS | 2399127 | 2400011 + | 30 | 30 | ON  | 325.06  | ON  | 400.39  | NIL | 352.9  | ON  | 304.68 | NIL | 312.14 |
| 2265 | chrSm | fluA1:SMC01611  | CDS | 2400172 | 2402373 + | 30 | 30 | NIL | 285.75  | NIL | 315.48  | NIL | 309.91 | NIL | 318.73 | NIL | 318.73 |
| 2266 | chrSm | TrnS-3:SMC01612 | CDS | 2402527 | 2403723 - | 75 | 0  | ON  | 702.53  | ON  | 740.9   | ON  | 451.55 | ON  | 516.95 | ON  | 399.21 |
| 2267 | chrSm | ribB:SMC01613   | CDS | 2404360 | 2404797 - | 30 | 30 | ON  | 388.94  | ON  | 374.04  | NIL | 325.57 | ON  | 356.18 | NIL | 317.62 |
| 2268 | chrSm | hpa2:SMC01614   | CDS | 2404835 | 2405602 - | 31 | 31 | ON  | 374.04  | ON  | 363.87  | NIL | 306.59 | NIL | 335.45 | ON  | 373.17 |
| 2269 | chrSm | ?               | CDS | 2405599 | 2406384 - | 30 | 30 | ON  | 364.15  | NIL | 416.17  | NIL | 326.35 | ON  | 354.56 | NIL | 353.27 |
| 2270 | chrSm | gryC:SMC01616   | CDS | 2406478 | 2407416 - | 30 | 30 | ON  | 377.35  | NIL | 315.18  | NIL | 354    | ON  | 300.54 | NIL | 307.82 |
| 2271 | chrSm | ?               | CDS | 2407430 | 2408275 - | 30 | 30 | NIL | 309.43  | ON  | 319.62  | NIL | 294.38 | NIL | 295.28 | NIL | 301.17 |
| 2272 | chrSm | ?               | CDS | 2408272 | 2409555 - | 31 | 31 | ON  | 315.89  | ON  | 315.89  | NIL | 375.23 | ON  | 384.75 | NIL | 306.15 |
| 2273 | chrSm | ?               | CDS | 2409552 | 2410607 - | 30 | 30 | ON  | 361.94  | ON  | 350.73  | NIL | 352    | ON  | 389.38 | ON  | 437.45 |
| 2274 | chrSm | eybB:SMC01620   | CDS | 2410621 | 2412135 - | 30 | 30 | ON  | 349.41  | ON  | 373.78  | NIL | 344.23 | NIL | 339.91 | NIL | 382.12 |
| 2275 | chrSm | flucA1:SMC01621 | CDS | 2412164 | 2412832 - | 30 | 30 | ON  | 357.14  | ON  | 326.74  | NIL | 308.12 | NIL | 309.24 | NIL | 312.1  |
| 2276 | chrSm | ?               | CDS | 2412842 | 2413879 - | 30 | 30 | NIL | 308.75  | NIL | 314.97  | NIL | 320.99 | ON  | 344.67 | NIL | 302.54 |
| 2277 | chrSm | enA:SMC01623    | CDS | 2413876 | 2415453   | 30 | 30 | NIL | 390.93  | ON  | 386.58  | NIL | 336.02 | NIL | 337.74 | NIL | 364.5  |
| 2278 | chrSm | ?               | CDS | 2415453 | 2416577 - | 30 | 30 | NIL | 305.52  | NIL | 295.82  | NIL | 288.85 | NIL | 322.42 | NIL | 301.74 |
| 2279 | chrSm | ?               | CDS | 2416574 | 2417697 - | 30 | 30 | NIL | 379.77  | ON  | 344.41  | ON  | 414.17 | ON  | 408.43 | NIL | 368.74 |
| 2280 | chrSm | ?               | CDS | 2417697 | 2418554 - | 30 | 30 | ON  | 316.98  | NIL | 296.2   | NIL | 263.01 | NIL | 300.7  | NIL | 261.62 |
| 2281 | chrSm | ?               | CDS | 2418566 | 2419489 - | 30 | 30 | ON  | 344.65  | ON  | 367.15  | NIL | 276.69 | ON  | 364.48 | NIL | 293.32 |
| 2282 | chrSm | ?               | CDS | 2421118 | 2421118 - | 30 | 30 | NIL | 305.03  | NIL | 300.23  | NIL | 361.6  | ON  | 391.8  | NIL | 335.03 |
| 2283 | chrSm | eyd:SMC01629    | CDS | 2421233 | 2422192 - | 30 | 30 | ON  | 352.68  | ON  | 338.97  | ON  | 420.25 | ON  | 392.24 | NIL | 434.79 |
| 2284 | chrSm | ?               | CDS | 2422399 | 2423202 - | 30 | 30 | NIL | 305.06  | NIL | 294.22  | NIL | 281.57 | NIL | 292.06 | NIL | 293.34 |
| 2285 | chrSm | ?               | CDS | 2423387 | 2424466 + | 30 | 30 | ON  | 334.57  | NIL | 340.71  | NIL | 397.66 | ON  | 374.37 | NIL | 317.05 |
| 2286 | chrSm | ?               | CDS | 2424518 | 2425681 + | 30 | 30 | ON  | 371.6   | ON  | 369.64  | ON  | 391.66 | ON  | 358.62 | NIL | 316.08 |
| 2287 | chrSm | ?               | CDS | 2425834 | 2426700 + | 30 | 30 | ON  | 342.93  | NIL | 302.51  | NIL | 338.06 | ON  | 342.3  | NIL | 324.32 |
| 2288 | chrSm | ?               | CDS | 2426700 | 2427578 + | 30 | 30 | ON  | 345.67  | ON  | 360.7   | NIL | 331    | ON  | 344.65 | NIL | 347.46 |

|      |       |             |     |         |         |   |    |    |     |         |     |        |     |        |     |        |     |        |
|------|-------|-------------|-----|---------|---------|---|----|----|-----|---------|-----|--------|-----|--------|-----|--------|-----|--------|
| 2289 | chrSm | 7. SMC01635 | CDS | 2427523 | 2428284 | + | 30 | 30 | ON  | 351.5   | ON  | 361.02 | ON  | 395.41 | ON  | 415.96 | ON  | 387.41 |
| 2290 | chrSm | 7. SMC01636 | CDS | 2428376 | 2429347 | + | 30 | 30 | ON  | 310.32  | NIL | 307.98 | NIL | 304.24 | ON  | 341.88 | NIL | 330.59 |
| 2291 | chrSm | 7. SMC01637 | CDS | 2429457 | 2430359 | + | 30 | 30 | NIL | 348.28  | NIL | 312.87 | NIL | 354.52 | NIL | 324.92 | NIL | 298.94 |
| 2292 | chrSm | 7. SMC01638 | CDS | 2430531 | 2432021 | + | 30 | 30 | NIL | 348.88  | ON  | 367.07 | NIL | 304.01 | ON  | 370.03 | NIL | 342.97 |
| 2293 | chrSm | 7. SMC01639 | CDS | 2432273 | 2433433 | + | 30 | 30 | NIL | 275.63  | NIL | 308.13 | NIL | 319.56 | NIL | 329.87 | NIL | 286.98 |
| 2294 | chrSm | 7. SMC01640 | CDS | 2433628 | 2435691 | + | 30 | 30 | ON  | 375.01  | ON  | 339.28 | NIL | 381.57 | ON  | 385.52 | NIL | 334.68 |
| 2295 | chrSm | 7. SMC01641 | CDS | 2435688 | 2438409 | + | 30 | 30 | ON  | 354.13  | ON  | 330.13 | NIL | 316.61 | ON  | 355.52 | NIL | 307.44 |
| 2296 | chrSm | 7. SMC01642 | CDS | 2436793 | 2439518 | + | 30 | 30 | ON  | 395.16  | ON  | 379.46 | NIL | 325.43 | ON  | 387.48 | NIL | 325.26 |
| 2297 | chrSm | 7. SMC01643 | CDS | 2438409 | 2440342 | + | 30 | 30 | ON  | 404.04  | ON  | 444.21 | NIL | 322.15 | ON  | 387.48 | NIL | 361.79 |
| 2298 | chrSm | 7. SMC01644 | CDS | 2439515 | 2440342 | + | 30 | 30 | ON  | 347.1   | ON  | 385.34 | ON  | 270.35 | ON  | 373.78 | NIL | 365.63 |
| 2299 | chrSm | 7. SMC01645 | CDS | 2440335 | 2441966 | + | 30 | 30 | ON  | 421.46  | ON  | 385.34 | ON  | 381.21 | NIL | 399.64 | NIL | 359.43 |
| 2300 | chrSm | 7. SMC01646 | CDS | 2441966 | 2441966 | - | 30 | 30 | NIL | 288.36  | NIL | 379.46 | NIL | 293.3  | NIL | 301.24 | NIL | 312.28 |
| 2301 | chrSm | 7. SMC01647 | CDS | 2442914 | 2445033 | + | 30 | 30 | ON  | 360.61  | ON  | 409.82 | ON  | 407.92 | ON  | 414.17 | ON  | 450.65 |
| 2302 | chrSm | 7. SMC01648 | CDS | 2445683 | 2446580 | + | 30 | 30 | ON  | 401.03  | ON  | 438.26 | NIL | 305.12 | NIL | 294.81 | NIL | 338.03 |
| 2303 | chrSm | 7. SMC01649 | CDS | 2446721 | 2447125 | - | 30 | 30 | NIL | 292.13  | ON  | 338.26 | NIL | 438.21 | NIL | 448.59 | NIL | 376.95 |
| 2304 | chrSm | 7. SMC01650 | CDS | 2447133 | 2448054 | - | 30 | 30 | ON  | 407.03  | ON  | 425.02 | ON  | 437.16 | ON  | 386.64 | NIL | 313.53 |
| 2305 | chrSm | 7. SMC01651 | CDS | 2448176 | 2449058 | + | 30 | 30 | ON  | 385.32  | ON  | 410.87 | NIL | 337.16 | ON  | 375.21 | NIL | 337.96 |
| 2306 | chrSm | 7. SMC01652 | CDS | 2449208 | 2450368 | + | 30 | 30 | ON  | 342.43  | ON  | 362.16 | NIL | 370.15 | NIL | 323.41 | NIL | 284.67 |
| 2307 | chrSm | 7. SMC01653 | CDS | 2450528 | 2451568 | + | 30 | 30 | NIL | 295.53  | ON  | 353.18 | NIL | 274.05 | NIL | 269.03 | NIL | 301.78 |
| 2308 | chrSm | 7. SMC01654 | CDS | 2451565 | 2452515 | + | 32 | 32 | NIL | 321.86  | NIL | 262.42 | NIL | 309.87 | NIL | 330.67 | NIL | 348.58 |
| 2309 | chrSm | 7. SMC01655 | CDS | 2452505 | 2453320 | + | 30 | 30 | ON  | 351.63  | ON  | 397.25 | ON  | 381.71 | ON  | 436.59 | ON  | 402.26 |
| 2310 | chrSm | 7. SMC01656 | CDS | 2453348 | 2454775 | + | 30 | 30 | NIL | 303.47  | ON  | 670.2  | ON  | 908.14 | ON  | 376.74 | NIL | 362.19 |
| 2311 | chrSm | 7. SMC01657 | CDS | 2455078 | 2457252 | + | 30 | 30 | NIL | 380.86  | ON  | 544.15 | ON  | 390.03 | ON  | 350.56 | NIL | 361.61 |
| 2312 | chrSm | 7. SMC01658 | CDS | 2457282 | 2458013 | + | 30 | 30 | ON  | 339.72  | ON  | 438.68 | ON  | 398.45 | ON  | 344.6  | NIL | 349.85 |
| 2313 | chrSm | 7. SMC01659 | CDS | 2458016 | 2459149 | + | 30 | 30 | ON  | 380.28  | ON  | 365.55 | NIL | 326.36 | ON  | 367.87 | NIL | 292.49 |
| 2314 | chrSm | 7. SMC01660 | CDS | 2459256 | 2459777 | + | 30 | 30 | ON  | 328.01  | ON  | 327.96 | NIL | 351.96 | ON  | 404.16 | NIL | 377.93 |
| 2315 | chrSm | 7. SMC01661 | CDS | 2459989 | 2461536 | - | 30 | 30 | ON  | 323.64  | ON  | 330.33 | NIL | 342.31 | ON  | 340    | NIL | 337.93 |
| 2316 | chrSm | 7. SMC01662 | CDS | 2461617 | 2464064 | - | 31 | 31 | ON  | 330.42  | NIL | 317.1  | NIL | 375.7  | ON  | 425.61 | NIL | 346.45 |
| 2317 | chrSm | 7. SMC01663 | CDS | 2464061 | 2465008 | - | 30 | 30 | ON  | 329.28  | ON  | 331.53 | NIL | 343.93 | ON  | 338.32 | NIL | 353.01 |
| 2318 | chrSm | 7. SMC01664 | CDS | 2466631 | 2467476 | + | 30 | 30 | NIL | 312.55  | ON  | 367.05 | NIL | 320.92 | NIL | 316.38 | NIL | 333.01 |
| 2319 | chrSm | 7. SMC01665 | CDS | 2467705 | 2469384 | + | 30 | 30 | NIL | 539.63  | ON  | 649.26 | ON  | 417.63 | ON  | 466.77 | ON  | 399.67 |
| 2320 | chrSm | 7. SMC01666 | CDS | 2469621 | 2470904 | + | 30 | 30 | NIL | 286.51  | NIL | 283.05 | NIL | 327.81 | NIL | 309.61 | NIL | 311.89 |
| 2321 | chrSm | 7. SMC01667 | CDS | 2471163 | 2471525 | - | 31 | 31 | NIL | 333.66  | ON  | 398.07 | NIL | 374.78 | ON  | 369.71 | NIL | 322.6  |
| 2322 | chrSm | 7. SMC01668 | CDS | 2471522 | 2472118 | - | 30 | 30 | ON  | 379.77  | ON  | 398.07 | NIL | 373.71 | ON  | 373.71 | NIL | 397.11 |
| 2323 | chrSm | 7. SMC01669 | CDS | 2472203 | 2472994 | + | 30 | 30 | NIL | 296.27  | NIL | 317.13 | NIL | 312.31 | ON  | 272.1  | ON  | 309.06 |
| 2324 | chrSm | 7. SMC01670 | CDS | 2473526 | 2473526 | + | 30 | 30 | NIL | 393.78  | ON  | 392.96 | ON  | 266.56 | NIL | 398.32 | ON  | 402.19 |
| 2325 | chrSm | 7. SMC01671 | CDS | 2473576 | 2473576 | + | 30 | 30 | NIL | 2476462 | ON  | 247.22 | NIL | 281.41 | NIL | 263.4  | NIL | 289.79 |
| 2326 | chrSm | 7. SMC01672 | CDS | 2476241 | 2476462 | - | 30 | 30 | NIL | 2476599 | ON  | 341.78 | ON  | 326.71 | ON  | 384.21 | NIL | 346.74 |
| 2327 | chrSm | 7. SMC01673 | CDS | 2477880 | 2477880 | - | 30 | 30 | ON  | 446.2   | ON  | 342.53 | ON  | 374.42 | ON  | 462.83 | NIL | 469.26 |
| 2328 | chrSm | 7. SMC01674 | CDS | 2478025 | 2478025 | - | 30 | 30 | ON  | 355.41  | ON  | 362.53 | ON  | 411.9  | ON  | 409.7  | NIL | 343.42 |
| 2329 | chrSm | 7. SMC01675 | CDS | 2478043 | 2478043 | + | 30 | 30 | ON  | 342.88  | ON  | 357.5  | NIL | 344.54 | NIL | 325.62 | NIL | 320.41 |
| 2330 | chrSm | 7. SMC01676 | CDS | 2480428 | 2481246 | + | 30 | 30 | ON  | 309.68  | NIL | 293.63 | NIL | 268.57 | NIL | 304.45 | NIL | 298.6  |
| 2331 | chrSm | 7. SMC01677 | CDS | 2481536 | 2481880 | - | 30 | 30 | ON  | 2482366 | NIL | 296.47 | NIL | 320.24 | NIL | 303.8  | NIL | 297.79 |
| 2332 | chrSm | 7. SMC01678 | CDS | 2482366 | 2483120 | + | 30 | 30 | ON  | 316.43  | NIL | 269.59 | ON  | 399.97 | NIL | 357.49 | NIL | 328.22 |
| 2333 | chrSm | 7. SMC01679 | CDS | 2483249 | 2483438 | + | 30 | 30 | NIL | 292.59  | NIL | 283.8  | NIL | 349.77 | NIL | 318.51 | NIL | 301.76 |
| 2334 | chrSm | 7. SMC01680 | CDS | 2483254 | 2483438 | + | 30 | 30 | NIL | 292.59  | NIL | 283.8  | NIL | 349.77 | NIL | 318.51 | NIL | 301.76 |
| 2335 | chrSm | 7. SMC01681 | CDS | 2483254 | 2483438 | + | 30 | 30 | NIL | 292.59  | NIL | 283.8  | NIL | 349.77 | NIL | 318.51 | NIL | 301.76 |
| 2336 | chrSm | 7. SMC01682 | CDS | 2483254 | 2483438 | + | 30 | 30 | NIL | 292.59  | NIL | 283.8  | NIL | 349.77 | NIL | 318.51 | NIL | 301.76 |
| 2337 | chrSm | 7. SMC01683 | CDS | 2483254 | 2483438 | + | 30 | 30 | NIL | 292.59  | NIL | 283.8  | NIL | 349.77 | NIL | 318.51 | NIL | 301.76 |
| 2338 | chrSm | 7. SMC01684 | CDS | 2483254 | 2483438 | + | 30 | 30 | NIL | 292.59  | NIL | 283.8  | NIL | 349.77 | NIL | 318.51 | NIL | 301.76 |
| 2339 | chrSm | 7. SMC01685 | CDS | 2483254 | 2483438 | + | 30 | 30 | NIL | 292.59  | NIL | 283.8  | NIL | 349.77 | NIL | 318.51 | NIL | 301.76 |
| 2340 | chrSm | 7. SMC01686 | CDS | 2483254 | 2483438 | + | 30 | 30 | NIL | 292.59  | NIL | 283.8  | NIL | 349.77 | NIL | 318.51 | NIL | 301.76 |
| 2341 | chrSm | 7. SMC01687 | CDS | 2483254 | 2483438 | + | 30 | 30 | NIL | 292.59  | NIL | 283.8  | NIL | 349.77 | NIL | 318.51 | NIL | 301.76 |
| 2342 | chrSm | 7. SMC01688 | CDS | 2483254 | 2483438 | + | 30 | 30 | NIL | 292.59  | NIL | 283.8  | NIL | 349.77 | NIL | 318.51 | NIL | 301.76 |
| 2343 | chrSm | 7. SMC01689 | CDS | 2483254 | 2483438 | + | 30 | 30 | NIL | 292.59  | NIL | 283.8  | NIL | 349.77 | NIL | 318.51 | NIL | 301.76 |
| 2344 | chrSm | 7. SMC01690 | CDS | 2483254 | 2483438 | + | 30 | 30 | NIL | 292.59  | NIL | 283.8  | NIL | 349.77 | NIL | 318.51 | NIL | 301.76 |
| 2345 | chrSm | 7. SMC01691 | CDS | 2483254 | 2483438 | + | 30 | 30 | NIL | 292.59  | NIL | 283.8  | NIL | 349.77 | NIL | 318.51 | NIL | 301.76 |
| 2346 | chrSm | 7. SMC01692 | CDS | 2483254 | 2483438 | + | 30 | 30 | NIL | 292.59  | NIL | 283.8  | NIL | 349.77 | NIL | 318.51 | NIL | 301.76 |
| 2347 | chrSm | 7. SMC01693 | CDS | 2483254 | 2483438 | + | 30 | 30 | NIL | 292.59  | NIL | 283.8  | NIL | 349.77 | NIL | 318.51 | NIL | 301.76 |
| 2348 | chrSm | 7. SMC01694 | CDS | 2483254 | 2483438 | + | 30 | 30 | NIL | 292.59  | NIL | 283.8  | NIL | 349.77 | NIL | 318.51 | NIL | 301.76 |
| 2349 | chrSm | 7. SMC01695 | CDS | 2483254 | 2483438 | + | 30 | 30 | NIL | 292.59  | NIL | 283.8  | NIL | 349.77 | NIL | 318.51 | NIL | 301.76 |
| 2350 | chrSm | 7. SMC01696 | CDS | 2483254 | 2483438 | + | 30 | 30 | NIL | 292.59  | NIL | 283.8  | NIL | 349.77 | NIL | 318.51 | NIL | 301.76 |
| 2351 | chrSm | 7. SMC01697 | CDS | 2483254 | 2483438 | + | 30 | 30 | NIL | 292.59  | NIL | 283.8  | NIL | 349.77 | NIL | 318.51 | NIL | 301.76 |
| 2352 | chrSm | 7. SMC01698 | CDS | 2483254 | 2483438 | + | 30 | 30 | NIL | 292.59  | NIL | 283.8  | NIL | 349.77 | NIL | 318.51 | NIL | 301.76 |
| 2353 | chrSm | 7. SMC01699 | CDS | 2483254 | 2483438 | + | 30 | 30 | NIL | 292.59  | NIL | 283.8  | NIL | 349.77 | NIL | 318.51 | NIL | 301.76 |
| 2354 | chrSm | 7. SMC01700 | CDS | 2483254 | 2483438 | + | 30 | 30 | NIL | 292.59  | NIL | 283.8  | NIL | 349.77 | NIL | 318.51 | NIL | 301.76 |
| 2355 | chrSm | 7. SMC01701 | CDS | 2483254 | 2483438 | + | 30 | 30 | NIL | 292.59  | NIL | 283.8  | NIL | 349.77 | NIL | 318.51 | NIL | 301.76 |
| 2356 | chrSm | 7. SMC01702 | CDS | 2483254 | 2483438 | + | 30 | 30 | NIL | 292.59  | NIL | 283.8  | NIL | 349.77 | NIL | 318.51 | NIL | 301.76 |
| 2357 | chrSm | 7. SMC01703 | CDS | 2483254 | 2483438 | + | 30 | 30 | NIL | 292.59  | NIL | 283.8  | NIL | 349.77 | NIL | 318.51 | NIL | 301.76 |
| 2358 | chrSm | 7. SMC01704 | CDS | 2483254 | 2483438 | + | 30 | 30 | NIL | 292.59  | NIL | 283.8  | NIL | 349.77 | NIL | 318.51 | NIL | 301.76 |
| 2359 | chrSm | 7. SMC01705 | CDS | 2483254 | 2483438 | + | 30 | 30 | NIL | 292.59  | NIL | 283.8  | NIL | 349.77 | NIL | 318.51 | NIL | 301.76 |
| 2360 | chrSm | 7. SMC01706 | CDS | 2483254 | 2483438 | + | 30 | 30 | NIL | 292.59  | NIL | 283.8  | NIL | 349.77 | NIL | 318.51 | NIL | 301.76 |

|            |                  |     |         |           |    |    |     |         |     |         |     |         |     |         |     |        |
|------------|------------------|-----|---------|-----------|----|----|-----|---------|-----|---------|-----|---------|-----|---------|-----|--------|
| 2361 chrSm | draG:SMC01567    | CDS | 2508817 | 2510820 - | 30 | 30 | ON  | 444.52  | ON  | 408.6   | ON  | 386.52  | ON  | 398.65  | ON  | 387.61 |
| 2362 chrSm | SMC01568         | CDS | 251054  | 2511503 - | 30 | 30 | ON  | 383.75  | ON  | 338.76  | ON  | 401.86  | ON  | 365.8   | ON  | 392.07 |
| 2363 chrSm | capA:SMC01569    | CDS | 2511829 | 2511829 + | 30 | 30 | ON  | 585.23  | ON  | 488.72  | ON  | 410.37  | ON  | 554.4   | ON  | 410.93 |
| 2364 chrSm | ?_SMC01570       | CDS | 2513073 | 2513963 - | 30 | 30 | ON  | 327.46  | ON  | 327.59  | NIL | 330.33  | ON  | 344.85  | NIL | 362.29 |
| 2365 chrSm | ?_SMC01571       | CDS | 2514076 | 2514837 + | 30 | 30 | ON  | 346.53  | ON  | 345.18  | NIL | 352.67  | ON  | 362.19  | NIL | 357.83 |
| 2366 chrSm | ?_SMC01572       | CDS | 2514862 | 2515329 + | 30 | 30 | ON  | 293.47  | NIL | 288.26  | NIL | 320.41  | NIL | 293.79  | NIL | 298.09 |
| 2367 chrSm | ?_SMC01577       | CDS | 2515340 | 2515723 + | 30 | 30 | NIL | 263.03  | NIL | 252.13  | NIL | 320.24  | NIL | 267.39  | NIL | 285.54 |
| 2368 chrSm | aatA:SMC01578    | CDS | 2515844 | 2517046 - | 30 | 30 | ON  | 491.9   | ON  | 448.64  | ON  | 421.56  | ON  | 408.22  | ON  | 442.85 |
| 2369 chrSm | ?_SMC01580       | CDS | 2517444 | 2517641 + | 34 | 34 | ON  | 399.32  | ON  | 393.32  | ON  | 396.54  | ON  | 394     | NIL | 315.37 |
| 2370 chrSm | ?_SMC01581       | CDS | 2517634 | 2517915 + | 30 | 30 | NIL | 306.69  | ON  | 333.52  | NIL | 338.76  | NIL | 330.03  | NIL | 313.61 |
| 2371 chrSm | ?_SMC01583       | CDS | 2519231 | 2519231 + | 30 | 30 | ON  | 315.81  | ON  | 332.69  | NIL | 333.79  | NIL | 335.25  | NIL | 321.19 |
| 2372 chrSm | ?_SMC01584       | CDS | 2519420 | 2520022 + | 30 | 30 | ON  | 408.32  | ON  | 356.26  | ON  | 392.92  | ON  | 349.23  | NIL | 321.19 |
| 2373 chrSm | capA3:SMC01585   | CDS | 2520992 | 2521207 + | 30 | 30 | ON  | 393     | ON  | 745.07  | ON  | 392.92  | ON  | 969.27  | NIL | 356    |
| 2374 chrSm | ?_SMC01586       | CDS | 2521351 | 2521776 + | 30 | 30 | ON  | 338.86  | ON  | 426.35  | NIL | 371.14  | ON  | 392.92  | NIL | 370.9  |
| 2375 chrSm | ?_SMC01587       | CDS | 2521587 | 2522488 - | 30 | 30 | ON  | 394.05  | ON  | 390.21  | NIL | 370.14  | NIL | 331.36  | NIL | 337.17 |
| 2376 chrSm | ?_SMC01589       | CDS | 2522598 | 2522753 - | 30 | 30 | NIL | 307.9   | NIL | 300.44  | ON  | 425.46  | NIL | 319.64  | NIL | 348.6  |
| 2377 chrSm | ?_SMC01590       | CDS | 2522971 | 2523603 + | 30 | 30 | NIL | 309.17  | ON  | 388.03  | NIL | 425.46  | ON  | 340.07  | NIL | 321.68 |
| 2378 chrSm | ?_SMC01591       | CDS | 2523929 | 2524195 + | 30 | 30 | ON  | 554.79  | ON  | 1279.7  | ON  | 521.49  | ON  | 835.24  | ON  | 527.05 |
| 2379 chrSm | ?_SMC01592       | CDS | 2524388 | 2524864 + | 30 | 30 | ON  | 357.12  | ON  | 359.81  | NIL | 261.92  | NIL | 301.75  | NIL | 280.09 |
| 2380 chrSm | ?_SMC01593       | CDS | 2525165 | 2525869 + | 30 | 30 | ON  | 366.18  | ON  | 384.98  | NIL | 328.24  | ON  | 337.94  | NIL | 294.95 |
| 2381 chrSm | ?_SMC01595       | CDS | 2525904 | 2527286 + | 30 | 30 | ON  | 325.36  | NIL | 325.72  | NIL | 334.69  | NIL | 327.72  | NIL | 301.97 |
| 2382 chrSm | csaA:SMC04456    | CDS | 2527299 | 2527640 - | 30 | 30 | ON  | 558.88  | ON  | 446.63  | ON  | 385.7   | ON  | 364.04  | NIL | 348.39 |
| 2383 chrSm | proC:SMC02677    | CDS | 2527748 | 2528566 - | 30 | 30 | ON  | 518.83  | ON  | 382.19  | NIL | 395.62  | ON  | 402.43  | NIL | 355.43 |
| 2384 chrSm | ?_SMC02678       | CDS | 2528568 | 2529068 - | 30 | 30 | ON  | 388.29  | ON  | 368.73  | ON  | 303.23  | NIL | 318.81  | NIL | 315.29 |
| 2385 chrSm | ?_SMC03744       | CDS | 2529546 | 2529833 - | 30 | 30 | ON  | 528.51  | ON  | 467.6   | ON  | 399.26  | ON  | 382.66  | NIL | 364.76 |
| 2386 chrSm | lgt:SMC02681     | CDS | 2530119 | 2530961 + | 30 | 30 | ON  | 517.48  | ON  | 470.73  | ON  | 417.33  | ON  | 390.13  | NIL | 356.5  |
| 2387 chrSm | ?_SMC02682       | CDS | 2530958 | 2532076 + | 30 | 30 | ON  | 525.29  | ON  | 453.74  | ON  | 392.49  | ON  | 400.48  | NIL | 405.96 |
| 2388 chrSm | ?_SMC02683       | CDS | 2532239 | 2533033 + | 30 | 30 | ON  | 502.21  | ON  | 430.47  | NIL | 364.91  | ON  | 398.3   | NIL | 346.48 |
| 2389 chrSm | ?_SMC02684       | CDS | 2533035 | 2534186 + | 30 | 30 | ON  | 419.65  | ON  | 393.05  | ON  | 472.9   | ON  | 576.63  | NIL | 435.79 |
| 2390 chrSm | ?_SMC02685       | CDS | 2534334 | 2535212 + | 30 | 30 | ON  | 813.6   | ON  | 464.99  | ON  | 396.3   | ON  | 418.05  | NIL | 426.5  |
| 2391 chrSm | pfsA:SMC02686    | CDS | 2535497 | 2536429 + | 30 | 30 | ON  | 347.01  | ON  | 346.2   | NIL | 361.77  | ON  | 369.49  | NIL | 363.15 |
| 2392 chrSm | ?_SMC02687       | CDS | 2536470 | 2537300 - | 30 | 30 | NIL | 264.07  | NIL | 269.43  | NIL | 349.36  | ON  | 415.21  | NIL | 374.84 |
| 2393 chrSm | ?_SMC02688       | CDS | 2537374 | 2537751 - | 30 | 30 | NIL | 354.91  | ON  | 369.07  | NIL | 306.56  | ON  | 1814.28 | NIL | 354.3  |
| 2394 chrSm | ?_SMC02689       | CDS | 2539395 | 2539615 - | 30 | 30 | ON  | 334.01  | ON  | 346.07  | NIL | 371.98  | ON  | 383.62  | NIL | 346.72 |
| 2395 chrSm | ?_SMC02690       | CDS | 2539659 | 2540615 - | 30 | 30 | ON  | 425.6   | ON  | 1260.13 | ON  | 996.22  | ON  | 1519.15 | NIL | 812.87 |
| 2396 chrSm | ?_SMC02691       | CDS | 2540889 | 2542121 + | 30 | 30 | ON  | 3869.64 | ON  | 329.8   | ON  | 336.28  | NIL | 319.99  | ON  | 322.03 |
| 2397 chrSm | pfv:SMC02692     | CDS | 2542289 | 2542903 + | 30 | 30 | ON  | 398.89  | ON  | 366.17  | ON  | 339.23  | ON  | 356.79  | ON  | 353.32 |
| 2398 chrSm | pht:SMC02693     | CDS | 2543265 | 2543435 - | 30 | 30 | ON  | 560.38  | ON  | 349.23  | ON  | 376.88  | NIL | 303.62  | NIL | 344.53 |
| 2399 chrSm | ?_SMC02694       | CDS | 2544045 | 2544576 + | 30 | 30 | ON  | 314.26  | NIL | 289.27  | ON  | 385.77  | NIL | 399.36  | NIL | 372.1  |
| 2400 chrSm | ?_SMC02695       | CDS | 2544576 | 2546007 + | 30 | 30 | ON  | 321.46  | NIL | 298.43  | NIL | 296.96  | NIL | 317.45  | NIL | 337.39 |
| 2401 chrSm | ?_SMC02696       | CDS | 2546004 | 2547074 + | 30 | 30 | NIL | 321.46  | NIL | 298.43  | NIL | 296.96  | NIL | 317.45  | NIL | 337.39 |
| 2402 chrSm | ?_SMC02697       | CDS | 2547074 | 2547662 - | 30 | 30 | ON  | 321.46  | NIL | 298.43  | NIL | 296.96  | NIL | 317.45  | NIL | 337.39 |
| 2403 chrSm | bpl:SMC02698     | CDS | 2547837 | 2548022 + | 30 | 30 | ON  | 386.74  | ON  | 520.74  | NIL | 335.54  | ON  | 489.14  | NIL | 390.92 |
| 2404 chrSm | ?_SMC02699       | CDS | 2548022 | 2549300 - | 31 | 31 | ON  | 338.75  | ON  | 321.87  | NIL | 369.95  | ON  | 335.9   | NIL | 347.54 |
| 2405 chrSm | ?_SMC02700       | CDS | 2548041 | 2549297 - | 30 | 30 | ON  | 321.26  | NIL | 289.94  | NIL | 336.61  | NIL | 319.41  | NIL | 348.5  |
| 2406 chrSm | ?_SMC02701       | CDS | 2549297 | 2549926 - | 30 | 30 | ON  | 361.41  | NIL | 325.65  | NIL | 337.86  | ON  | 473.86  | ON  | 405.55 |
| 2407 chrSm | ?_SMC02702       | CDS | 2549926 | 2550609 - | 30 | 30 | ON  | 499.84  | ON  | 554.21  | ON  | 466.84  | ON  | 370.85  | NIL | 333.8  |
| 2408 chrSm | ?_SMC02703       | CDS | 2550609 | 2551921 + | 30 | 30 | ON  | 392.33  | ON  | 401.17  | ON  | 435.43  | ON  | 404.38  | NIL | 347.33 |
| 2409 chrSm | ?_SMC02704       | CDS | 2551925 | 2552845 + | 30 | 30 | ON  | 409.64  | ON  | 350.25  | ON  | 352.47  | ON  | 483.43  | ON  | 491.41 |
| 2410 chrSm | ?_SMC02705       | CDS | 2552842 | 2552845 + | 30 | 30 | ON  | 367.77  | ON  | 343.05  | ON  | 398.88  | ON  | 407     | ON  | 389.14 |
| 2411 chrSm | ?_SMC02706       | CDS | 2555666 | 2557735 - | 30 | 30 | ON  | 390.8   | ON  | 306.12  | NIL | 275.81  | NIL | 282.96  | NIL | 284.41 |
| 2412 chrSm | ?_SMC02707       | CDS | 2557750 | 2558301 - | 30 | 30 | NIL | 282.04  | NIL | 285.55  | NIL | 278.13  | NIL | 282.96  | NIL | 285.57 |
| 2413 chrSm | ?_SMC02708       | CDS | 2558559 | 2559651 + | 30 | 30 | NIL | 292.81  | NIL | 360.42  | NIL | 350.42  | NIL | 318.41  | NIL | 346.25 |
| 2414 chrSm | ?_SMC02709       | CDS | 2559923 | 2560894 + | 30 | 30 | NIL | 386.02  | ON  | 367.55  | NIL | 288.5   | NIL | 317.39  | NIL | 352.77 |
| 2415 chrSm | lgt:SMC02710     | CDS | 2560894 | 2561510 - | 30 | 30 | NIL | 306.79  | NIL | 314.32  | NIL | 373.96  | ON  | 360.05  | NIL | 345    |
| 2416 chrSm | ?_SMC02711       | CDS | 2561510 | 2562495 + | 30 | 30 | ON  | 382     | ON  | 383.41  | ON  | 330.99  | ON  | 430.31  | ON  | 403.16 |
| 2417 chrSm | ?_SMC02712       | CDS | 2561593 | 2562304 + | 30 | 30 | ON  | 424.34  | ON  | 388.84  | ON  | 360.26  | NIL | 327.91  | NIL | 371.55 |
| 2418 chrSm | lpoE3:SMC02713   | CDS | 2562489 | 2563208 + | 30 | 30 | ON  | 397.54  | ON  | 368.9   | NIL | 336.92  | ON  | 412.76  | NIL | 358.77 |
| 2419 chrSm | ?_SMC02714       | CDS | 2563208 | 2564035 + | 30 | 30 | ON  | 385.28  | ON  | 364.23  | ON  | 400.26  | NIL | 356.34  | NIL | 325.15 |
| 2420 chrSm | ?_SMC02715       | CDS | 2564158 | 2564586 - | 30 | 30 | ON  | 398.07  | ON  | 411.71  | NIL | 288.76  | ON  | 330.15  | NIL | 318.73 |
| 2421 chrSm | ?_SMC02716       | CDS | 2564583 | 2564834 - | 30 | 30 | ON  | 421.89  | ON  | 509.39  | NIL | 359.11  | ON  | 415.85  | NIL | 368.65 |
| 2422 chrSm | leuA1:SMC02717   | CDS | 2566972 | 2566681 - | 30 | 30 | ON  | 494.25  | ON  | 432.01  | ON  | 352.47  | ON  | 674.7   | ON  | 544.48 |
| 2423 chrSm | ?_SMC02718       | CDS | 2566972 | 2566972 - | 51 | 2  | ON  | 470.86  | ON  | 1006.42 | ON  | 522.33  | ON  | 269.73  | NIL | 291.67 |
| 2424 chrSm | TRN22-5:SMC02719 | CDS | 2567153 | 2568304 - | 30 | 30 | ON  | 1074.45 | ON  | 306.13  | NIL | 320.13  | NIL | 259.73  | NIL | 309.33 |
| 2425 chrSm | cpf2:SMC02720    | CDS | 2568304 | 2572276 + | 38 | 38 | NIL | 271.26  | NIL | 311.56  | NIL | 303.6   | NIL | 376.87  | NIL | 334.93 |
| 2426 chrSm | ?_SMC02721       | CDS | 2569478 | 2572015 - | 30 | 30 | ON  | 468.57  | ON  | 303.49  | NIL | 361.83  | ON  | 376.87  | NIL | 337.91 |
| 2427 chrSm | ?_SMC02722       | CDS | 2571104 | 2572811 - | 31 | 31 | ON  | 396.51  | NIL | 322.03  | NIL | 423.17  | NIL | 419.14  | NIL | 396.36 |
| 2428 chrSm | ?_SMC02723       | CDS | 2572047 | 2573428 - | 30 | 30 | ON  | 512.14  | ON  | 1959.56 | ON  | 1202.83 | ON  | 390.09  | NIL | 417.66 |
| 2429 chrSm | ?_SMC02724       | CDS | 2573597 | 2575786 - | 30 | 30 | ON  | 329.76  | ON  | 487.3   | ON  | 384.43  | ON  | 382.68  | NIL | 331.94 |
| 2430 chrSm | trpE:SMC02725    | CDS | 2573597 | 2575786 - | 30 | 30 | ON  | 329.76  | ON  | 487.3   | ON  | 384.43  | ON  | 382.68  | NIL | 331.94 |
| 2431 chrSm | ?_SMC02726       | CDS | 2576060 | 2578291 - | 30 | 30 | ON  | 344.6   | ON  | 487.3   | ON  | 384.43  | ON  | 382.68  | NIL | 331.94 |
| 2432 chrSm | ?_SMC02727       | CDS | 2578415 | 2579401 + | 30 | 30 | ON  | 344.6   | ON  | 487.3   | ON  | 384.43  | ON  | 382.68  | NIL | 331.94 |

|      |       |                  |     |         |         |   |    |    |     |        |     |         |     |         |     |        |     |        |
|------|-------|------------------|-----|---------|---------|---|----|----|-----|--------|-----|---------|-----|---------|-----|--------|-----|--------|
| 2433 | chrSm | fts.SMC02728     | CDS | 2579562 | 2581268 | - | 30 | 30 | ON  | 318.51 | NIL | 275.13  | NIL | 319.4   | ON  | 375.19 | ON  | 383.57 |
| 2434 | chrSm | 2.SMC02729       | CDS | 2581332 | 2582555 | - | 30 | 30 | ON  | 451.47 | ON  | 490.23  | NIL | 412.71  | ON  | 460.23 | ON  | 391.33 |
| 2435 | chrSm | 2.SMC02730       | CDS | 2582559 | 2583848 | - | 30 | 30 | ON  | 387.07 | ON  | 328.81  | NIL | 356.96  | NIL | 328.51 | NIL | 328.31 |
| 2436 | chrSm | TR022.8.SMC02731 | CDS | 2584032 | 2585195 | + | 49 | 0  | ON  | 459.79 | ON  | 423.01  | ON  | 352.47  | ON  | 393.61 | ON  | 342.46 |
| 2437 | chrSm | 2.SMC02732       | CDS | 2585373 | 2585777 | - | 30 | 30 | ON  | 462.34 | ON  | 457.86  | NIL | 362.88  | ON  | 439.93 | ON  | 372.74 |
| 2438 | chrSm | 2.SMC02733       | CDS | 2585890 | 2587806 | - | 30 | 30 | ON  | 380.48 | NIL | 308.37  | NIL | 365.47  | ON  | 346.77 | NIL | 319.34 |
| 2439 | chrSm | 2.SMC02734       | CDS | 2589020 | 2590108 | - | 30 | 30 | ON  | 374.13 | ON  | 387.8   | NIL | 336.84  | NIL | 303.4  | NIL | 324.66 |
| 2440 | chrSm | tkk.SMC02735     | CDS | 2590269 | 2590508 | - | 30 | 30 | ON  | 452.43 | ON  | 520.33  | ON  | 369.93  | NIL | 588.78 | NIL | 366.63 |
| 2441 | chrSm | tkk.SMC02736     | CDS | 2591143 | 2592099 | + | 30 | 30 | ON  | 383.93 | NIL | 263.91  | ON  | 379.17  | NIL | 317.66 | NIL | 308.52 |
| 2442 | chrSm | opuC.SMC02737    | CDS | 2591143 | 2592101 | + | 30 | 30 | ON  | 638.62 | ON  | 563.57  | ON  | 445.34  | ON  | 548.97 | NIL | 352.22 |
| 2443 | chrSm | opuB.SMC02738    | CDS | 2592256 | 2593101 | + | 30 | 30 | ON  | 479.68 | ON  | 398.11  | NIL | 347.73  | ON  | 385.35 | NIL | 330.68 |
| 2444 | chrSm | opuA.SMC02739    | CDS | 2593098 | 2594147 | + | 30 | 30 | ON  | 538.21 | ON  | 445.84  | ON  | 477.27  | ON  | 457.54 | ON  | 454.48 |
| 2445 | chrSm | 2.SMC04457       | CDS | 2594181 | 2594924 | + | 30 | 30 | ON  | 428.76 | ON  | 376.27  | NIL | 332.44  | NIL | 330.37 | NIL | 335.6  |
| 2446 | chrSm | 2.SMC01535       | CDS | 2595634 | 2596067 | + | 30 | 30 | ON  | 392.92 | ON  | 358.93  | NIL | 308.11  | ON  | 338.92 | NIL | 327.71 |
| 2447 | chrSm | 2.SMC01534       | CDS | 2596157 | 2597085 | + | 30 | 30 | ON  | 467.88 | ON  | 494.58  | ON  | 394.67  | ON  | 592.36 | NIL | 367.39 |
| 2448 | chrSm | adecC1.SMC01533  | CDS | 2597573 | 2599270 | + | 30 | 30 | ON  | 345.49 | ON  | 340.85  | NIL | 330.11  | ON  | 355.78 | NIL | 333.3  |
| 2449 | chrSm | 2.SMC01532       | CDS | 2599454 | 2601097 | - | 30 | 30 | ON  | 404.01 | ON  | 331.85  | NIL | 369.65  | ON  | 356.43 | ON  | 404.75 |
| 2450 | chrSm | Kdgg.SMC01531    | CDS | 2601249 | 2602149 | + | 30 | 30 | ON  | 388.26 | ON  | 365.54  | ON  | 399.26  | ON  | 393.91 | ON  | 376.95 |
| 2451 | chrSm | TrmH.4.SMC01530  | CDS | 2602399 | 2603595 | + | 76 | 0  | ON  | 702.25 | ON  | 734.94  | ON  | 452.48  | ON  | 518.12 | ON  | 320.44 |
| 2452 | chrSm | dppF2.SMC01529   | CDS | 2603823 | 2604587 | - | 31 | 31 | ON  | 433.44 | ON  | 366.55  | NIL | 315.45  | NIL | 297.33 | NIL | 320.99 |
| 2453 | chrSm | dppD2.SMC01528   | CDS | 2604587 | 2605420 | - | 30 | 30 | ON  | 388.12 | NIL | 313.13  | NIL | 334.53  | NIL | 337.98 | NIL | 311.73 |
| 2454 | chrSm | dppC2.SMC01527   | CDS | 2605417 | 2606349 | - | 31 | 31 | ON  | 390.07 | ON  | 403.08  | ON  | 400.63  | ON  | 367.64 | ON  | 384.21 |
| 2455 | chrSm | dppB2.SMC01526   | CDS | 2606346 | 2607389 | - | 30 | 30 | ON  | 455.93 | ON  | 337.49  | NIL | 320.65  | ON  | 346.78 | ON  | 338.35 |
| 2456 | chrSm | dppA2.SMC01525   | CDS | 2607431 | 2609071 | - | 30 | 30 | ON  | 858.29 | ON  | 561.73  | ON  | 470.59  | ON  | 703.9  | ON  | 436.45 |
| 2457 | chrSm | 2.SMC01524       | CDS | 2609119 | 2610174 | - | 30 | 30 | ON  | 620.16 | ON  | 495.89  | ON  | 404.78  | ON  | 406.62 | ON  | 374.62 |
| 2458 | chrSm | emrE.SMC01523    | CDS | 2610354 | 2610695 | - | 30 | 30 | ON  | 316.73 | ON  | 370.95  | NIL | 213.03  | NIL | 238.22 | NIL | 288.13 |
| 2459 | chrSm | 2.SMC01522       | CDS | 2610743 | 2611303 | - | 30 | 30 | ON  | 410.52 | ON  | 442.63  | ON  | 406.49  | ON  | 394.62 | ON  | 379.68 |
| 2460 | chrSm | ntrP.SMC03949    | CDS | 2611440 | 2611712 | + | 30 | 30 | ON  | 352.44 | ON  | 372.66  | ON  | 407.28  | ON  | 422.29 | ON  | 360.84 |
| 2461 | chrSm | ntrI.SMC01521    | CDS | 2611709 | 2612113 | + | 30 | 30 | ON  | 365.14 | ON  | 380.54  | ON  | 431.47  | ON  | 402.74 | NIL | 310.66 |
| 2462 | chrSm | 2.SMC01520       | CDS | 2612241 | 2612833 | + | 30 | 30 | ON  | 350.2  | ON  | 326.22  | NIL | 314.09  | ON  | 359.64 | ON  | 374.42 |
| 2463 | chrSm | 2.SMC01519       | CDS | 2612639 | 2613013 | + | 30 | 30 | ON  | 340    | ON  | 343.83  | NIL | 417.45  | ON  | 357.88 | ON  | 388.67 |
| 2464 | chrSm | 2.SMC01748       | CDS | 2612831 | 2613396 | + | 30 | 30 | ON  | 297.49 | NIL | 306.82  | NIL | 287.27  | NIL | 285.91 | NIL | 305.5  |
| 2465 | chrSm | 2.SMC01518       | CDS | 2613136 | 2613825 | - | 30 | 30 | NIL | 313.85 | ON  | 422.64  | ON  | 327.61  | NIL | 332.74 | NIL | 327.61 |
| 2466 | chrSm | 2.SMC01517       | CDS | 2613838 | 2614104 | - | 30 | 30 | NIL | 317.54 | ON  | 750.15  | ON  | 592.7   | ON  | 554.67 | ON  | 493.94 |
| 2467 | chrSm | 2.SMC01516       | CDS | 2614157 | 2614570 | - | 30 | 30 | ON  | 345.65 | ON  | 710.58  | ON  | 474     | ON  | 438.45 | ON  | 295.64 |
| 2468 | chrSm | 2.SMC01515       | CDS | 2614694 | 2615620 | - | 30 | 30 | NIL | 458.47 | ON  | 1037.68 | ON  | 611.11  | ON  | 584.45 | ON  | 440.42 |
| 2469 | chrSm | 2.SMC01514       | CDS | 2615661 | 2616095 | - | 30 | 30 | NIL | 284.84 | ON  | 831.61  | ON  | 492.59  | ON  | 554.67 | ON  | 376.4  |
| 2470 | chrSm | 2.SMC01747       | CDS | 2616325 | 2616465 | + | 30 | 30 | ON  | 459.23 | ON  | 1186.1  | ON  | 722.93  | ON  | 741.58 | ON  | 734.63 |
| 2471 | chrSm | hmus.SMC01513    | CDS | 2616470 | 2617537 | + | 30 | 30 | ON  | 378.65 | ON  | 307.97  | ON  | 1066.18 | ON  | 492.2  | ON  | 504.31 |
| 2472 | chrSm | hmUJ.SMC01512    | CDS | 2617595 | 2618545 | + | 30 | 30 | NIL | 307.96 | ON  | 810.74  | ON  | 609.5   | ON  | 375.32 | ON  | 409.97 |
| 2473 | chrSm | hmuv.SMC01510    | CDS | 2618559 | 2619850 | + | 30 | 30 | ON  | 393.96 | ON  | 673.39  | ON  | 395.5   | ON  | 378.72 | NIL | 318.49 |
| 2474 | chrSm | 2.SMC01509       | CDS | 2620447 | 2620471 | + | 30 | 30 | ON  | 350.18 | ON  | 407.27  | NIL | 364.99  | ON  | 341.19 | ON  | 386.22 |
| 2475 | chrSm | 2.SMC01508       | CDS | 2620654 | 2621016 | + | 30 | 30 | NIL | 282.19 | NIL | 315.92  | NIL | 306.14  | NIL | 296.86 | NIL | 327.76 |
| 2476 | chrSm | 2.SMC01507       | CDS | 2621064 | 2621495 | + | 30 | 30 | NIL | 311.04 | ON  | 305.46  | NIL | 340.64  | NIL | 319.38 | NIL | 353.25 |
| 2477 | chrSm | 2.SMC01506       | CDS | 2621661 | 2623166 | - | 30 | 30 | ON  | 364.41 | ON  | 363.53  | NIL | 369.07  | NIL | 342.14 | NIL | 336.47 |
| 2478 | chrSm | tpoE2.SMC01505   | CDS | 2623460 | 2624014 | - | 30 | 30 | ON  | 324.89 | ON  | 371.69  | NIL | 318.4   | NIL | 312.04 | NIL | 321.85 |
| 2479 | chrSm | 2.SMC01504       | CDS | 2624022 | 2624189 | - | 30 | 30 | ON  | 365.84 | ON  | 447.71  | NIL | 312.23  | NIL | 300.31 | NIL | 288.1  |
| 2480 | chrSm | 2.SMC01503       | CDS | 2624350 | 2625144 | + | 30 | 30 | ON  | 366.96 | ON  | 517.03  | ON  | 415.76  | ON  | 431.63 | NIL | 361.98 |
| 2481 | chrSm | 2.SMC01502       | CDS | 2625527 | 2627110 | - | 30 | 30 | ON  | 374.83 | ON  | 391.72  | ON  | 415.47  | ON  | 447.91 | ON  | 425.17 |
| 2482 | chrSm | 2.SMC01501       | CDS | 2627194 | 2627868 | - | 30 | 30 | ON  | 436.2  | ON  | 391.79  | ON  | 370.64  | ON  | 412.35 | ON  | 436.43 |
| 2483 | chrSm | mtkK.SMC01501    | CDS | 2627865 | 2629349 | - | 30 | 30 | ON  | 336.64 | NIL | 309.38  | NIL | 302.83  | NIL | 288.48 | NIL | 310.34 |
| 2484 | chrSm | smo5.SMC01500    | CDS | 2629376 | 2630149 | - | 31 | 31 | NIL | 290.15 | NIL | 307.62  | NIL | 341.8   | NIL | 352.62 | NIL | 309.06 |
| 2485 | chrSm | smoK.SMC01499    | CDS | 2630146 | 2631147 | - | 30 | 30 | ON  | 311.5  | NIL | 296.79  | NIL | 291.07  | NIL | 304.51 | NIL | 363.11 |
| 2486 | chrSm | smoG.SMC01498    | CDS | 2631178 | 2632008 | - | 30 | 30 | ON  | 322.09 | NIL | 296.02  | NIL | 334.24  | NIL | 337.2  | NIL | 312.98 |
| 2487 | chrSm | smoP.SMC01497    | CDS | 2632014 | 2632886 | - | 30 | 30 | NIL | 295.36 | NIL | 276.23  | NIL | 284.8   | NIL | 278.49 | NIL | 312.66 |
| 2488 | chrSm | smoE.SMC01496    | CDS | 2633076 | 2634386 | - | 30 | 30 | NIL | 309.36 | ON  | 327.87  | NIL | 356.95  | ON  | 369.2  | NIL | 328.21 |
| 2489 | chrSm | smoC.SMC01495    | CDS | 2635333 | 2635533 | - | 30 | 30 | NIL | 354.07 | ON  | 345.08  | NIL | 352.92  | NIL | 333    | NIL | 333.71 |
| 2490 | chrSm | 2.SMC01814       | CDS | 2635733 | 2637094 | + | 30 | 30 | ON  | 440.83 | NIL | 314.36  | NIL | 346.88  | ON  | 343.56 | NIL | 326.17 |
| 2491 | chrSm | 2.SMC01815       | CDS | 2637126 | 2638439 | + | 30 | 30 | ON  | 411.07 | ON  | 388.74  | NIL | 362.27  | ON  | 383.05 | NIL | 357.13 |
| 2492 | chrSm | 2.SMC01816       | CDS | 2639526 | 2639526 | - | 30 | 30 | ON  | 345.36 | ON  | 332.54  | ON  | 337.7   | ON  | 389.05 | NIL | 352.76 |
| 2493 | chrSm | 2.SMC01817       | CDS | 2639634 | 2640530 | + | 30 | 30 | ON  | 334    | ON  | 337.7   | NIL | 347.86  | ON  | 345.8  | NIL | 347.36 |
| 2494 | chrSm | cyaC.SMC01818    | CDS | 2640278 | 2642351 | + | 30 | 30 | ON  | 356.94 | ON  | 331.15  | NIL | 329.27  | NIL | 329.69 | ON  | 294.49 |
| 2495 | chrSm | 2.SMC01819       | CDS | 2642750 | 2643351 | - | 33 | 33 | ON  | 360.67 | ON  | 355.84  | NIL | 324.57  | NIL | 323.26 | NIL | 345.46 |
| 2496 | chrSm | 2.SMC01820       | CDS | 2643508 | 2644920 | + | 30 | 30 | ON  | 508.78 | ON  | 407.57  | ON  | 458.52  | ON  | 473.83 | NIL | 423.34 |
| 2497 | chrSm | dnt.SMC01821     | CDS | 2645098 | 2646592 | + | 30 | 30 | ON  | 369.93 | ON  | 319.34  | NIL | 350.36  | ON  | 373.34 | NIL | 373.72 |
| 2498 | chrSm | 2.SMC01822       | CDS | 2646604 | 2646987 | - | 30 | 30 | NIL | 278.51 | NIL | 315.19  | NIL | 295.69  | NIL | 304.02 | NIL | 324.74 |
| 2499 | chrSm | 2.SMC01823       | CDS | 2647016 | 2647930 | + | 30 | 30 | NIL | 281.62 | NIL | 288.23  | NIL | 321.19  | NIL | 308.29 | NIL | 321.51 |
| 2500 | chrSm | 2.SMC01824       | CDS | 2647974 | 2648405 | + | 30 | 30 | NIL | 398.4  | ON  | 334.52  | NIL | 344.75  | ON  | 376.96 | NIL | 347.94 |
| 2501 | chrSm | 2.SMC01825       | CDS | 2648408 | 2649292 | + | 30 | 30 | ON  | 347.12 | ON  | 336.22  | NIL | 288.26  | ON  | 341.65 | NIL | 325.97 |
| 2502 | chrSm | 2.SMC01826       | CDS | 2649289 | 2650158 | + | 30 | 30 | ON  | 360.27 | ON  | 336.49  | NIL | 351.77  | ON  | 350.6  | NIL | 362.98 |
| 2503 | chrSm | 2.SMC01827       | CDS | 2650188 | 2651180 | + | 30 | 30 | ON  | 451.24 | ON  | 382.56  | NIL | 350.19  | ON  | 451.57 | ON  | 386.69 |
| 2504 | chrSm | 2.SMC01828       | CDS | 2651785 | 2652972 | + | 30 | 30 | ON  | 406.97 | ON  | 346.61  | NIL | 373.23  | ON  | 418.92 | ON  | 339.65 |

|      |       |          |          |     |         |           |    |    |     |         |     |        |     |        |     |        |     |        |
|------|-------|----------|----------|-----|---------|-----------|----|----|-----|---------|-----|--------|-----|--------|-----|--------|-----|--------|
| 2505 | chrSm | ?        | SMC01829 | CDS | 2652988 | 2656299 + | 30 | 30 | ON  | 362.91  | ON  | 355.47 | NIL | 325.5  | ON  | 329.43 | NIL | 292.87 |
| 2506 | chrSm | ureg     | SMC01830 | CDS | 2656604 | 2657215 - | 30 | 30 | ON  | 364.92  | ON  | 405.16 | NIL | 305.84 | NIL | 298.88 | NIL | 350.43 |
| 2507 | chrSm | uref     | SMC01831 | CDS | 2657252 | 2657923 - | 31 | 31 | ON  | 380.57  | ON  | 369.97 | NIL | 377.73 | ON  | 366.87 | NIL | 325.91 |
| 2508 | chrSm | uree     | SMC01832 | CDS | 2657916 | 2658380 - | 30 | 30 | ON  | 447.11  | ON  | 453.47 | ON  | 463.76 | ON  | 410.53 | ON  | 383    |
| 2509 | chrSm | ?        | SMC01833 | CDS | 2658382 | 2658678 - | 30 | 30 | ON  | 527.55  | ON  | 504.43 | ON  | 523.64 | ON  | 473.03 | ON  | 408.49 |
| 2510 | chrSm | ?        | SMC01834 | CDS | 2659868 | 2659410 - | 30 | 30 | ON  | 1214.04 | ON  | 836.25 | ON  | 584.53 | ON  | 470.3  | ON  | 569.16 |
| 2511 | chrSm | ?        | SMC01995 | CDS | 2659700 | 2660086 + | 33 | 33 | ON  | 404.11  | ON  | 374.41 | ON  | 380.99 | ON  | 462.7  | ON  | 398.61 |
| 2512 | chrSm | ?        | SMC01836 | CDS | 2660070 | 2660336   | 30 | 30 | ON  | 321.93  | ON  | 349.78 | NIL | 362.44 | ON  | 346.33 | ON  | 406.69 |
| 2513 | chrSm | urec     | SMC01837 | CDS | 2660316 | 2662462 - | 30 | 30 | NIL | 405.78  | ON  | 323.12 | NIL | 366.86 | ON  | 419.42 | ON  | 422.2  |
| 2514 | chrSm | ?        | SMC01838 | CDS | 2662466 | 2663120   | 31 | 31 | NIL | 294.35  | NIL | 338.22 | NIL | 292.83 | NIL | 290.51 | NIL | 321.47 |
| 2515 | chrSm | ?        | SMC02046 | CDS | 2663120 | 2663539 - | 30 | 30 | NIL | 365.86  | ON  | 588.05 | ON  | 436.04 | ON  | 381.64 | NIL | 341.38 |
| 2516 | chrSm | ureB     | SMC01939 | CDS | 2663853 | 2664107 - | 30 | 30 | ON  | 420.84  | ON  | 500.45 | ON  | 466.97 | ON  | 507.08 | ON  | 398.25 |
| 2517 | chrSm | ?        | SMC01940 | CDS | 2664120 | 2664422 - | 30 | 30 | ON  | 404.68  | ON  | 681.86 | ON  | 382.65 | ON  | 456.09 | NIL | 369.32 |
| 2518 | chrSm | ureA     | SMC01941 | CDS | 2664451 | 2665484 - | 30 | 30 | ON  | 379.54  | ON  | 353.83 | ON  | 382.65 | ON  | 508.25 | NIL | 441.5  |
| 2519 | chrSm | ureD     | SMC01942 | CDS | 2665350 | 2666327 - | 30 | 30 | ON  | 364.27  | ON  | 394.56 | NIL | 395.64 | ON  | 401.69 | NIL | 372.15 |
| 2520 | chrSm | ?        | SMC01943 | CDS | 2665350 | 2666327 - | 30 | 30 | ON  | 364.27  | ON  | 371.96 | NIL | 366.87 | ON  | 408.03 | NIL | 354.97 |
| 2521 | chrSm | ?        | SMC01944 | CDS | 2666449 | 2667450 - | 30 | 30 | ON  | 447.49  | ON  | 371.96 | NIL | 366    | ON  | 344.33 | NIL | 345.57 |
| 2522 | chrSm | ?        | SMC01945 | CDS | 2667667 | 2668083 + | 30 | 30 | ON  | 318.98  | NIL | 310.01 | NIL | 344.23 | NIL | 336.26 | NIL | 361.31 |
| 2523 | chrSm | llyK     | SMC01946 | CDS | 2668389 | 2669507 - | 30 | 30 | ON  | 631.26  | ON  | 411.26 | ON  | 417.99 | ON  | 617.92 | NIL | 368.45 |
| 2524 | chrSm | ?        | SMC01947 | CDS | 2669622 | 2669966 - | 30 | 30 | ON  | 506.61  | ON  | 372.27 | NIL | 275.33 | ON  | 398.78 | NIL | 255.43 |
| 2525 | chrSm | llyF     | SMC01948 | CDS | 2669992 | 2670717 - | 30 | 30 | ON  | 543.91  | ON  | 360.16 | NIL | 332.63 | ON  | 386.62 | NIL | 328.9  |
| 2526 | chrSm | llyG     | SMC01949 | CDS | 2670714 | 2671601 - | 31 | 31 | ON  | 376.39  | NIL | 327.23 | NIL | 319.35 | ON  | 354.48 | NIL | 305.86 |
| 2527 | chrSm | llyM     | SMC01950 | CDS | 2671601 | 2672986 - | 30 | 30 | ON  | 530.71  | ON  | 388.86 | NIL | 286.02 | ON  | 421.6  | ON  | 337.24 |
| 2528 | chrSm | llyH     | SMC01951 | CDS | 2672991 | 2673893 - | 30 | 30 | ON  | 673.5   | ON  | 410.67 | ON  | 389.9  | ON  | 557.29 | NIL | 382.57 |
| 2529 | chrSm | cysQ     | SMC01952 | CDS | 2674288 | 2675064 + | 30 | 30 | NIL | 421.86  | ON  | 339.33 | NIL | 305.09 | NIL | 314.91 | NIL | 335.26 |
| 2530 | chrSm | ?        | SMC01953 | CDS | 2675078 | 2675464 - | 30 | 30 | NIL | 292.97  | NIL | 288.33 | NIL | 238.4  | NIL | 255.76 | NIL | 256.03 |
| 2531 | chrSm | ?        | SMC01954 | CDS | 2675589 | 2676290 - | 30 | 30 | ON  | 335.13  | ON  | 339.21 | NIL | 271.96 | NIL | 332.91 | NIL | 326.25 |
| 2532 | chrSm | ?        | SMC01955 | CDS | 2676633 | 2677508 + | 30 | 30 | ON  | 567.8   | ON  | 537.4  | ON  | 412.26 | ON  | 497.52 | ON  | 466.5  |
| 2533 | chrSm | ?        | SMC01956 | CDS | 2677505 | 2679061 + | 30 | 30 | ON  | 523.06  | ON  | 398.33 | ON  | 461.63 | ON  | 456.15 | ON  | 412.88 |
| 2534 | chrSm | ?        | SMC01957 | CDS | 2680478 | 2680478 + | 30 | 30 | NIL | 300.71  | ON  | 342.8  | NIL | 372.73 | NIL | 322.42 | NIL | 331.47 |
| 2535 | chrSm | Trm1-b-4 | SMC01994 | CDS | 2680164 | 2681873 + | 74 | 0  | NIL | 539.44  | ON  | 419.21 | NIL | 309.11 | ON  | 358.27 | NIL | 305.8  |
| 2536 | chrSm | Trm1-a-4 | SMC01959 | CDS | 2681870 | 2682241 - | 48 | 0  | NIL | 558.03  | ON  | 449.52 | ON  | 385.05 | ON  | 545.86 | NIL | 478.71 |
| 2537 | chrSm | ?        | SMC01960 | CDS | 2682956 | 2683162 - | 30 | 30 | NIL | 289.11  | ON  | 339.16 | NIL | 310.3  | ON  | 336.32 | NIL | 339.62 |
| 2538 | chrSm | ?        | SMC01961 | CDS | 2683289 | 2684242 - | 30 | 30 | ON  | 325     | ON  | 299.27 | ON  | 389.73 | ON  | 349.36 | ON  | 307.32 |
| 2539 | chrSm | ?        | SMC01962 | CDS | 2684402 | 2685181 - | 30 | 30 | NIL | 301.64  | NIL | 289.27 | NIL | 321.72 | NIL | 291.9  | NIL | 306.32 |
| 2540 | chrSm | ?        | SMC01963 | CDS | 2685178 | 2685978 - | 31 | 31 | NIL | 424.74  | ON  | 391.56 | NIL | 301.65 | ON  | 347.01 | NIL | 334.26 |
| 2541 | chrSm | ?        | SMC01964 | CDS | 2685975 | 2686829   | 30 | 30 | ON  | 468.61  | ON  | 397.38 | NIL | 328.37 | ON  | 351.66 | NIL | 333.63 |
| 2542 | chrSm | ?        | SMC01965 | CDS | 2686826 | 2687863 - | 30 | 30 | ON  | 436.07  | ON  | 433.64 | NIL | 332.46 | ON  | 326.84 | NIL | 356.75 |
| 2543 | chrSm | ?        | SMC01966 | CDS | 2688038 | 2689117 - | 30 | 30 | ON  | 419.89  | ON  | 423.64 | NIL | 332.46 | ON  | 361.21 | NIL | 347.23 |
| 2544 | chrSm | spcB2    | SMC01967 | CDS | 2689288 | 2691606 + | 30 | 30 | ON  | 342.25  | NIL | 340.54 | NIL | 348.2  | ON  | 385.93 | NIL | 344.73 |
| 2545 | chrSm | ?        | SMC01968 | CDS | 2690563 | 2691606 + | 30 | 30 | ON  | 338.84  | ON  | 322.4  | NIL | 334.65 | NIL | 325    | NIL | 322.1  |
| 2546 | chrSm | ?        | SMC01969 | CDS | 2691652 | 2692830 + | 30 | 30 | ON  | 413.82  | ON  | 405.97 | NIL | 368.55 | ON  | 354.78 | NIL | 323.8  |
| 2547 | chrSm | ?        | SMC01970 | CDS | 2692836 | 2693681 - | 30 | 30 | ON  | 324.84  | NIL | 307.15 | NIL | 324.85 | NIL | 299.04 | NIL | 297.29 |
| 2548 | chrSm | ?        | SMC01971 | CDS | 2693875 | 2695308 - | 30 | 30 | ON  | 333.97  | ON  | 374.1  | NIL | 364.4  | ON  | 409.74 | NIL | 363.47 |
| 2549 | chrSm | ord1     | SMC01972 | CDS | 2695795 | 2697108 - | 30 | 30 | ON  | 386.46  | ON  | 349.17 | NIL | 300.49 | ON  | 343.24 | NIL | 312.46 |
| 2550 | chrSm | ?        | SMC01973 | CDS | 2697105 | 2698472 - | 30 | 30 | ON  | 386.12  | NIL | 312.58 | ON  | 409.34 | ON  | 426.6  | NIL | 331.52 |
| 2551 | chrSm | ?        | SMC01974 | CDS | 2698596 | 2699288 + | 30 | 30 | NIL | 292.1   | NIL | 281.53 | NIL | 283.94 | NIL | 289.93 | NIL | 292.99 |
| 2552 | chrSm | ?        | SMC01975 | CDS | 2699551 | 2700267 + | 30 | 30 | NIL | 393.31  | ON  | 377.34 | NIL | 345.81 | NIL | 369.19 | NIL | 344.56 |
| 2553 | chrSm | ?        | SMC01976 | CDS | 2700264 | 2701436 + | 30 | 30 | ON  | 339.82  | ON  | 329.86 | ON  | 332.14 | NIL | 307.77 | NIL | 317.38 |
| 2554 | chrSm | ?        | SMC01977 | CDS | 2701474 | 2702736 + | 30 | 30 | ON  | 362.85  | ON  | 428.3  | NIL | 322.14 | NIL | 366.5  | NIL | 300.11 |
| 2555 | chrSm | ?        | SMC01978 | CDS | 2702834 | 2703769 + | 30 | 30 | ON  | 408.08  | ON  | 414.85 | NIL | 322.83 | NIL | 332.83 | NIL | 328.27 |
| 2556 | chrSm | ?        | SMC01979 | CDS | 2703374 | 2704607 + | 30 | 30 | ON  | 361.39  | ON  | 334.9  | NIL | 318.46 | NIL | 333.97 | NIL | 290.89 |
| 2557 | chrSm | ?        | SMC01980 | CDS | 2704614 | 2705681 + | 30 | 30 | ON  | 344.8   | ON  | 334.9  | NIL | 352.7  | ON  | 358.87 | NIL | 316.3  |
| 2558 | chrSm | ?        | SMC01981 | CDS | 2705882 | 2706268 + | 30 | 30 | NIL | 292.2   | ON  | 352.62 | NIL | 352.7  | ON  | 379.69 | NIL | 332.54 |
| 2559 | chrSm | coxA     | SMC01982 | CDS | 2706406 | 2707350 + | 30 | 30 | NIL | 289.98  | ON  | 324.78 | NIL | 305.16 | ON  | 359.54 | ON  | 337.83 |
| 2560 | chrSm | coxB     | SMC01983 | CDS | 2707384 | 2709166 + | 30 | 30 | ON  | 333.84  | ON  | 358.33 | NIL | 337.38 | ON  | 377.33 | NIL | 337.97 |
| 2561 | chrSm | coxA     | SMC01984 | CDS | 2709162 | 2709860 + | 30 | 30 | ON  | 319.51  | ON  | 369.48 | NIL | 285.98 | ON  | 354.11 | NIL | 329.12 |
| 2562 | chrSm | comp     | SMC01985 | CDS | 2709873 | 2710595 + | 30 | 30 | NIL | 294.73  | ON  | 359.79 | NIL | 281.33 | NIL | 321.58 | NIL | 289.98 |
| 2563 | chrSm | ?        | SMC01986 | CDS | 2710607 | 2710966 + | 30 | 30 | NIL | 293.62  | ON  | 345.73 | NIL | 321    | NIL | 336.29 | NIL | 317.37 |
| 2564 | chrSm | ?        | SMC01987 | CDS | 2711227 | 2713788 + | 30 | 30 | ON  | 1038.04 | ON  | 446.31 | NIL | 372.44 | NIL | 377.17 | NIL | 330    |
| 2565 | chrSm | ?        | SMC01988 | CDS | 2713876 | 2714718 - | 30 | 30 | ON  | 309.03  | NIL | 302.3  | NIL | 299.31 | NIL | 292.08 | NIL | 288.81 |
| 2566 | chrSm | ?        | SMC01989 | CDS | 2714977 | 2715375 + | 30 | 30 | NIL | 293.66  | ON  | 362.52 | NIL | 296.93 | NIL | 320.89 | NIL | 343.93 |
| 2567 | chrSm | ?        | SMC01990 | CDS | 2715477 | 2716700 - | 30 | 30 | NIL | 281.63  | NIL | 290.07 | NIL | 345.67 | NIL | 302.74 | NIL | 297.29 |
| 2568 | chrSm | ?        | SMC01991 | CDS | 2716832 | 2717557 - | 30 | 30 | NIL | 301.69  | NIL | 291.63 | NIL | 319.81 | NIL | 296.02 | NIL | 311.15 |
| 2569 | chrSm | ?        | SMC01992 | CDS | 2717638 | 2718678 - | 30 | 30 | NIL | 358.14  | ON  | 379.96 | NIL | 335.1  | NIL | 337.94 | NIL | 351.59 |
| 2570 | chrSm | ?        | SMC01993 | CDS | 2719070 | 2719070 - | 30 | 30 | ON  | 329.79  | ON  | 333.45 | NIL | 300.29 | NIL | 272.29 | NIL | 325.83 |
| 2571 | chrSm | ?        | SMC02016 | CDS | 2719137 | 2720399 - | 30 | 30 | NIL | 326.6   | ON  | 372.73 | ON  | 400.75 | ON  | 384.74 | NIL | 351.89 |
| 2572 | chrSm | ?        | SMC02017 | CDS | 2720460 | 2721458 - | 30 | 30 | NIL | 280.46  | NIL | 314.98 | NIL | 300.74 | NIL | 301.97 | NIL | 314.28 |
| 2573 | chrSm | ?        | SMC02018 | CDS | 2721482 | 2722345 - | 30 | 30 | NIL | 310.09  | NIL | 312.43 | NIL | 320.72 | ON  | 332.09 | NIL | 343.85 |
| 2574 | chrSm | ?        | SMC02019 | CDS | 2723366 | 2723370 - | 31 | 31 | NIL | 270.8   | NIL | 314.62 | NIL | 307.87 | NIL | 304.58 | NIL | 316.39 |
| 2575 | chrSm | ?        | SMC02020 | CDS | 2723367 | 2724125 - | 30 | 30 | NIL | 258.73  | NIL | 265.77 | NIL | 295.75 | NIL | 288.94 | NIL | 284.95 |
| 2576 | chrSm | ?        | SMC02021 | CDS | 2724226 | 2725260 - | 30 | 30 | ON  | 314.91  | ON  | 352.15 | NIL | 335.1  | NIL | 315.86 | NIL | 345.47 |

|      |       |                 |     |         |   |         |   |    |    |     |        |     |        |     |        |     |        |     |        |
|------|-------|-----------------|-----|---------|---|---------|---|----|----|-----|--------|-----|--------|-----|--------|-----|--------|-----|--------|
| 2577 | chrSm | 7: SM602022     | CDS | 2725662 | - | 2726654 | - | 30 | 30 | ON  | 383.49 | ON  | 341.87 | ON  | 392.36 | ON  | 394.1  | NIL | 356.53 |
| 2578 | chrSm | 7: SM602023     | CDS | 2726789 | + | 2727064 | + | 30 | 30 | ON  | 322.16 | ON  | 330.2  | NIL | 334.53 | NIL | 332.46 | NIL | 355.53 |
| 2579 | chrSm | 7: SM602024     | CDS | 2727090 | - | 2728697 | - | 30 | 30 | ON  | 278.07 | NIL | 285.83 | NIL | 327.67 | NIL | 330.34 | NIL | 332.21 |
| 2580 | chrSm | 7: SM602025     | CDS | 2728713 | - | 2730257 | - | 30 | 30 | NIL | 289.75 | NIL | 293.83 | NIL | 338.67 | NIL | 337.17 | NIL | 346.18 |
| 2581 | chrSm | 7: SM602026     | CDS | 2730281 | - | 2731117 | - | 30 | 30 | ON  | 319.91 | NIL | 323.83 | NIL | 326.33 | NIL | 304.32 | NIL | 287.7  |
| 2582 | chrSm | 7: SM602027     | CDS | 2731117 | - | 2732274 | - | 31 | 31 | NIL | 292.63 | NIL | 302.72 | NIL | 334.07 | NIL | 300.82 | NIL | 304.04 |
| 2583 | chrSm | 7: SM602028     | CDS | 2732271 | - | 2733589 | - | 30 | 30 | ON  | 431.22 | ON  | 387.43 | NIL | 341.24 | ON  | 338.33 | NIL | 370.27 |
| 2584 | chrSm | 7: SM602029     | CDS | 2733586 | - | 2734530 | - | 30 | 30 | ON  | 392.15 | ON  | 399.9  | NIL | 344.04 | ON  | 373.63 | NIL | 338.76 |
| 2585 | chrSm | 7: SM602030     | CDS | 2734514 | - | 2735614 | - | 30 | 30 | NIL | 291.12 | NIL | 309.49 | NIL | 364.14 | ON  | 289.06 | NIL | 371.53 |
| 2586 | chrSm | 7: SM602031     | CDS | 2735614 | - | 2736722 | - | 30 | 30 | NIL | 336.47 | ON  | 324.08 | NIL | 332.12 | NIL | 312.72 | NIL | 305.04 |
| 2587 | chrSm | 7: SM602032     | CDS | 2737045 | - | 2738529 | - | 30 | 30 | ON  | 349.6  | NIL | 310.34 | NIL | 302.19 | NIL | 308.53 | NIL | 287.44 |
| 2588 | chrSm | 7: SM602033     | CDS | 2738529 | - | 2739849 | - | 30 | 30 | NIL | 323.96 | NIL | 298.56 | NIL | 327.79 | NIL | 326.3  | NIL | 337.78 |
| 2589 | chrSm | 7: SM602034     | CDS | 2739849 | - | 2741143 | - | 30 | 30 | NIL | 269.43 | NIL | 255.33 | NIL | 290.47 | NIL | 275.17 | NIL | 269.59 |
| 2590 | chrSm | 7: SM602035     | CDS | 2740370 | - | 2742411 | - | 30 | 30 | NIL | 306.18 | NIL | 296.23 | NIL | 323.95 | NIL | 329.89 | NIL | 320.19 |
| 2591 | chrSm | 7: SM602036     | CDS | 2742411 | - | 2743270 | - | 30 | 30 | ON  | 367.32 | ON  | 390.54 | NIL | 335.29 | NIL | 340.16 | NIL | 319.85 |
| 2592 | chrSm | 7: SM602037     | CDS | 2743270 | + | 2744282 | + | 30 | 30 | ON  | 336.97 | NIL | 351.84 | NIL | 347.42 | ON  | 359.79 | NIL | 318.73 |
| 2593 | chrSm | 7: SM602038     | CDS | 2744282 | + | 2745431 | + | 30 | 30 | ON  | 350.35 | ON  | 301.84 | NIL | 374.65 | ON  | 358.44 | ON  | 378.27 |
| 2594 | chrSm | 7: SM602039     | CDS | 2745430 | + | 2746128 | + | 41 | 41 | NIL | 300.16 | ON  | 319.08 | NIL | 312.61 | NIL | 284.38 | NIL | 318.85 |
| 2595 | chrSm | 7: SM602040     | CDS | 2746128 | + | 2746615 | + | 35 | 35 | NIL | 280.71 | NIL | 308.84 | NIL | 312.61 | NIL | 282.27 | NIL | 318.85 |
| 2596 | chrSm | 7: SM602041     | CDS | 2746615 | + | 2746923 | + | 30 | 30 | NIL | 305.52 | NIL | 278.19 | ON  | 448.72 | ON  | 346.45 | NIL | 351.92 |
| 2597 | chrSm | 7: SM602042     | CDS | 2746923 | + | 2747598 | + | 31 | 31 | NIL | 380.63 | ON  | 385.74 | ON  | 378.16 | ON  | 416.54 | ON  | 426.66 |
| 2598 | chrSm | edat1: SM602043 | CDS | 2747595 | + | 2748248 | + | 30 | 30 | ON  | 321.41 | ON  | 308.67 | ON  | 304.36 | ON  | 321.33 | NIL | 284.8  |
| 2599 | chrSm | 7: SM602044     | CDS | 2748245 | + | 2749198 | + | 30 | 30 | ON  | 333.95 | ON  | 335.39 | NIL | 359.09 | ON  | 334.39 | NIL | 296.1  |
| 2600 | chrSm | 7: SM602045     | CDS | 2749198 | + | 2750135 | + | 30 | 30 | ON  | 336.01 | ON  | 328.54 | NIL | 359.55 | ON  | 356.21 | NIL | 314.06 |
| 2601 | chrSm | 7: SM602332     | CDS | 2750132 | + | 2750992 | + | 30 | 30 | ON  | 312.24 | NIL | 321.63 | NIL | 298.31 | NIL | 303.66 | NIL | 289.12 |
| 2602 | chrSm | 7: SM602460     | CDS | 2750992 | + | 2751895 | + | 30 | 30 | ON  | 316.99 | ON  | 341.11 | NIL | 325.23 | NIL | 303.43 | NIL | 317.56 |
| 2603 | chrSm | 7: SM602333     | CDS | 2751898 | + | 2752644 | + | 30 | 30 | ON  | 414.51 | ON  | 407.05 | NIL | 369.33 | ON  | 376.62 | NIL | 327.78 |
| 2604 | chrSm | 7: SM602334     | CDS | 2752649 | + | 2754196 | + | 30 | 30 | ON  | 397.53 | ON  | 353.5  | NIL | 405.89 | ON  | 383.96 | NIL | 361.7  |
| 2605 | chrSm | 7: SM602335     | CDS | 2754193 | + | 2755722 | + | 30 | 30 | ON  | 349.86 | ON  | 348.04 | ON  | 412.64 | ON  | 392.99 | ON  | 380.91 |
| 2606 | chrSm | 7: SM602336     | CDS | 2755733 | + | 2756511 | + | 30 | 30 | ON  | 337.38 | ON  | 326.04 | NIL | 361.32 | ON  | 353.87 | NIL | 351.35 |
| 2607 | chrSm | 7: SM602452     | CDS | 2756511 | + | 2757708 | - | 31 | 31 | NIL | 302.42 | ON  | 360.57 | NIL | 262.41 | NIL | 353.87 | NIL | 295.44 |
| 2608 | chrSm | 7: SM602337     | CDS | 2757708 | - | 2759210 | - | 30 | 30 | ON  | 383.24 | ON  | 365.81 | ON  | 433.48 | ON  | 474.28 | ON  | 405.65 |
| 2609 | chrSm | 7: SM602338     | CDS | 2759210 | - | 2760225 | - | 30 | 30 | ON  | 326.44 | NIL | 324.15 | NIL | 317.71 | NIL | 318.37 | ON  | 324.29 |
| 2610 | chrSm | 7: SM602339     | CDS | 2760225 | - | 2761053 | - | 30 | 30 | ON  | 325.44 | ON  | 357.83 | ON  | 409.89 | ON  | 373.44 | ON  | 381    |
| 2611 | chrSm | 7: SM602340     | CDS | 2761053 | + | 2761391 | + | 30 | 30 | ON  | 319.73 | ON  | 385.39 | NIL | 295.31 | NIL | 315.85 | NIL | 307.67 |
| 2612 | chrSm | 7: SM602341     | CDS | 2761391 | + | 2763575 | + | 30 | 30 | ON  | 370.2  | ON  | 365.67 | ON  | 434.23 | NIL | 398.14 | NIL | 371.72 |
| 2613 | chrSm | IKt1: SM602342  | CDS | 2763575 | - | 2765596 | - | 30 | 30 | NIL | 298.36 | NIL | 295.51 | NIL | 333.93 | NIL | 309.66 | NIL | 322.98 |
| 2614 | chrSm | 7: SM602343     | CDS | 2765596 | - | 2767129 | - | 30 | 30 | ON  | 350.87 | ON  | 383.92 | NIL | 333.44 | ON  | 372.37 | NIL | 305.41 |
| 2615 | chrSm | 7: SM602344     | CDS | 2767129 | - | 2768305 | - | 30 | 30 | ON  | 430.89 | ON  | 478.47 | ON  | 384.28 | ON  | 351.11 | NIL | 365.02 |
| 2616 | chrSm | 7: SM602345     | CDS | 2768305 | - | 2769227 | - | 30 | 30 | ON  | 365.55 | ON  | 368.33 | NIL | 362    | ON  | 457.78 | NIL | 374.76 |
| 2617 | chrSm | 7: SM602346     | CDS | 2769227 | - | 2770075 | - | 30 | 30 | ON  | 403.15 | ON  | 421.64 | ON  | 526.11 | ON  | 311.12 | NIL | 402.78 |
| 2618 | chrSm | BSIB: SM602347  | CDS | 2770093 | - | 2770422 | - | 30 | 30 | ON  | 329.25 | ON  | 341.35 | NIL | 325.71 | NIL | 325.71 | NIL | 319.39 |
| 2619 | chrSm | BSIB: SM602349  | CDS | 2770426 | - | 2772069 | - | 30 | 30 | ON  | 321.44 | ON  | 364.78 | NIL | 326.27 | ON  | 357.33 | NIL | 330.35 |
| 2620 | chrSm | 7: SM602350     | CDS | 2772069 | - | 2772724 | - | 30 | 30 | NIL | 313.47 | ON  | 338.63 | NIL | 311.87 | NIL | 287.77 | NIL | 314.33 |
| 2621 | chrSm | 7: SM602351     | CDS | 2772724 | - | 2773417 | - | 30 | 30 | ON  | 429.63 | ON  | 377.46 | ON  | 409.2  | ON  | 417.19 | ON  | 383.27 |
| 2622 | chrSm | 7: SM602352     | CDS | 2773417 | - | 2774852 | - | 30 | 30 | ON  | 453.52 | NIL | 322.25 | ON  | 352.22 | ON  | 403.89 | NIL | 332.55 |
| 2623 | chrSm | 7: SM602353     | CDS | 2774852 | - | 2775759 | - | 30 | 30 | ON  | 458.15 | ON  | 322.25 | ON  | 390.8  | ON  | 403.89 | NIL | 332.55 |
| 2624 | chrSm | 7: SM602354     | CDS | 2775759 | - | 2776918 | - | 30 | 30 | ON  | 358.63 | NIL | 397.7  | NIL | 352.04 | ON  | 340.04 | ON  | 394.78 |
| 2625 | chrSm | 7: SM602355     | CDS | 2776918 | + | 2777373 | + | 30 | 30 | ON  | 384.6  | NIL | 314.84 | NIL | 298.04 | NIL | 295.99 | NIL | 315.26 |
| 2626 | chrSm | 7: SM602356     | CDS | 2777373 | + | 2778666 | + | 30 | 30 | ON  | 415.81 | NIL | 303.02 | NIL | 303.13 | NIL | 299.31 | NIL | 306.24 |
| 2627 | chrSm | 7: SM602357     | CDS | 2778666 | + | 2779452 | + | 31 | 31 | NIL | 253.57 | NIL | 233.57 | NIL | 342.78 | NIL | 252.36 | NIL | 288.99 |
| 2628 | chrSm | 7: SM602358     | CDS | 2779452 | + | 2780152 | + | 30 | 30 | ON  | 414.97 | ON  | 369.59 | ON  | 375.37 | NIL | 361.05 | NIL | 346.61 |
| 2629 | chrSm | 7: SM602359     | CDS | 2780152 | + | 2781046 | + | 30 | 30 | ON  | 468.41 | ON  | 417.34 | NIL | 297.83 | ON  | 368.28 | NIL | 326.77 |
| 2630 | chrSm | 7: SM602360     | CDS | 2781046 | + | 2782087 | + | 30 | 30 | ON  | 427.06 | ON  | 377.46 | NIL | 273.66 | NIL | 321.74 | NIL | 338.78 |
| 2631 | chrSm | 7: SM602412     | CDS | 2782087 | + | 2782752 | + | 30 | 30 | ON  | 325.18 | ON  | 324.47 | NIL | 273.66 | NIL | 272.48 | NIL | 298.89 |
| 2632 | chrSm | 7: SM602413     | CDS | 2782752 | + | 2784079 | + | 30 | 30 | ON  | 365.89 | ON  | 330.69 | NIL | 364.77 | NIL | 332.39 | NIL | 355.53 |
| 2633 | chrSm | 7: SM602414     | CDS | 2784079 | + | 2785613 | - | 30 | 30 | ON  | 352.63 | ON  | 354.09 | NIL | 377.5  | NIL | 352.39 | NIL | 355.53 |
| 2634 | chrSm | 7: SM602415     | CDS | 2785613 | - | 2786302 | + | 30 | 30 | ON  | 347.08 | NIL | 318.91 | NIL | 351.73 | NIL | 354.97 | NIL | 349.57 |
| 2635 | chrSm | 7: SM602416     | CDS | 2786302 | + | 2786850 | + | 30 | 30 | ON  | 380.92 | ON  | 400.2  | ON  | 356.79 | ON  | 401.65 | ON  | 385.21 |
| 2636 | chrSm | 7: SM602417     | CDS | 2786850 | + | 2790791 | + | 30 | 30 | NIL | 340.73 | NIL | 330.37 | NIL | 312.81 | NIL | 290.28 | NIL | 317.43 |
| 2637 | chrSm | 7: SM602418     | CDS | 2790791 | + | 2791820 | + | 30 | 30 | NIL | 324.23 | NIL | 314.05 | NIL | 302.56 | NIL | 302.56 | NIL | 322.77 |
| 2638 | chrSm | 7: SM602419     | CDS | 2791820 | + | 2792805 | + | 30 | 30 | ON  | 356.5  | NIL | 321.79 | NIL | 325.6  | NIL | 310.04 | NIL | 356.6  |
| 2639 | chrSm | 7: SM602420     | CDS | 2792805 | + | 2794004 | + | 30 | 30 | ON  | 388.05 | ON  | 352.3  | ON  | 400.99 | NIL | 379.41 | NIL | 368.42 |
| 2640 | chrSm | 7: SM602421     | CDS | 2794004 | + | 2795497 | + | 30 | 30 | ON  | 368.4  | ON  | 343.56 | NIL | 367.28 | NIL | 333.68 | NIL | 324.07 |
| 2641 | chrSm | 7: SM602423     | CDS | 2795497 | + | 2796473 | + | 30 | 30 | ON  | 432.87 | ON  | 350.35 | ON  | 429.07 | ON  | 371.91 | NIL | 328.74 |
| 2642 | chrSm | 7: SM602424     | CDS | 2796470 | + | 2797474 | + | 30 | 30 | ON  | 425.82 | ON  | 349.71 | NIL | 327.19 | ON  | 364.13 | NIL | 370.73 |
| 2643 | chrSm | 7: SM602425     | CDS | 2797474 | + | 2798232 | - | 30 | 30 | ON  | 311.17 | NIL | 255.76 | NIL | 327.19 | NIL | 324.92 | NIL | 291.69 |
| 2644 | chrSm | 7: SM602426     | CDS | 2798232 | - | 2798939 | + | 30 | 30 | NIL | 310.57 | NIL | 311.73 | NIL | 336.88 | NIL | 313.19 | NIL | 320.93 |
| 2645 | chrSm | hyle: SM602427  | CDS | 2798939 | + | 2799750 | + | 30 | 30 | ON  | 320.05 | NIL | 284.5  | NIL | 309.13 | NIL | 330.26 | NIL | 297.44 |
| 2646 | chrSm | 7: SM602428     | CDS | 2799750 | + | 2801327 | - | 30 | 30 | NIL | 307.72 | NIL | 304.6  | NIL | 321.88 | NIL | 276.67 | NIL | 301.31 |
| 2647 | chrSm | 7: SM602429     | CDS | 2801327 | - | 2802389 | - | 30 | 30 | ON  | 314.69 | NIL | 279.8  | NIL | 324.3  | ON  | 346.67 | NIL | 335.13 |
| 2648 | chrSm | Trn17-1         |     |         |   |         |   |    |    |     |        |     |        |     |        |     |        |     |        |



|      |       |                     |      |           |           |    |    |     |         |     |         |     |        |     |         |     |         |
|------|-------|---------------------|------|-----------|-----------|----|----|-----|---------|-----|---------|-----|--------|-----|---------|-----|---------|
| 2724 | chrSm | 7. SMC00698         | CDS  | 2881681   | 2881962 + | 30 | 30 | ON  | 382.97  | ON  | 385.2   | ON  | 473.49 | ON  | 442.05  | ON  | 397.87  |
| 2725 | chrSm | 7. SMC00697         | CDS  | 2882239   | 2883543 - | 31 | 31 | ON  | 424.61  | ON  | 383.5   | NIL | 321.22 | ON  | 341.01  | ON  | 361.19  |
| 2726 | chrSm | arob. SMC00696      | CDS  | 2883540   | 2884673 - | 30 | 30 | ON  | 395.1   | ON  | 403.51  | NIL | 326.22 | NIL | 327.43  | NIL | 318.28  |
| 2727 | chrSm | arob. SMC00695      | CDS  | 2884678   | 2885256 - | 30 | 30 | ON  | 488.3   | ON  | 412.44  | ON  | 430.9  | ON  | 379.79  | NIL | 355.5   |
| 2728 | chrSm | 7. SMC00694         | CDS  | 2885341   | 2885915 - | 31 | 31 | ON  | 350.25  | ON  | 347.06  | NIL | 341.99 | ON  | 336.2   | NIL | 328.49  |
| 2729 | chrSm | 7. SMC00693         | CDS  | 2885640   | 2885915 - | 30 | 30 | ON  | 316.87  | ON  | 354.54  | NIL | 321.26 | ON  | 343.12  | NIL | 329.87  |
| 2730 | chrSm | 7. SMC00692         | CDS  | 2886203   | 2886349 + | 30 | 30 | ON  | 494.09  | ON  | 521.71  | ON  | 406.72 | ON  | 432.26  | NIL | 342.68  |
| 2731 | chrSm | kerD. SMC00691      | CDS  | 2886349   | 2887284 + | 30 | 30 | ON  | 371.04  | ON  | 336.97  | ON  | 385.38 | ON  | 393.4   | NIL | 339.19  |
| 2732 | chrSm | acca. SMC00690      | CDS  | 2887348   | 2888301 + | 30 | 30 | ON  | 559.29  | ON  | 595.77  | ON  | 418.94 | ON  | 426.81  | ON  | 355.74  |
| 2733 | chrSm | 7. SMC00689         | CDS  | 2887348   | 2889388 + | 30 | 30 | ON  | 562.71  | ON  | 594.22  | ON  | 488.98 | ON  | 452.87  | ON  | 355.17  |
| 2734 | chrSm | 7. SMC00688         | CDS  | 2889388   | 2890227 + | 30 | 30 | NIL | 294.28  | NIL | 305.64  | NIL | 342.25 | ON  | 370.85  | NIL | 303.72  |
| 2735 | chrSm | 7. SMC00687         | CDS  | 2890227   | 2890659 - | 30 | 30 | NIL | 343.31  | ON  | 323.7   | NIL | 377.69 | NIL | 316.6   | NIL | 316.64  |
| 2736 | chrSm | 7. SMC00686         | CDS  | 2890659   | 2890892 - | 30 | 30 | NIL | 265.79  | NIL | 280.51  | NIL | 364.5  | NIL | 370.42  | NIL | 330.74  |
| 2737 | chrSm | 7. SMC00685         | CDS  | 2891001   | 2891141 - | 58 | 58 | ON  | 436.89  | ON  | 456.89  | ON  | 359.68 | ON  | 372.23  | NIL | 329.71  |
| 2738 | chrSm | 7. SMC00684         | CDS  | 2891001   | 2891141 - | 31 | 31 | ON  | 446.77  | ON  | 426.52  | NIL | 367.92 | ON  | 372.23  | NIL | 334.83  |
| 2739 | chrSm | 7. SMC00683         | CDS  | 2892160   | 2893242 - | 30 | 30 | ON  | 348.57  | ON  | 369.21  | NIL | 377.95 | ON  | 365.87  | NIL | 343.76  |
| 2740 | chrSm | hipO1. SMC00682     | CDS  | 2893494   | 2894657 + | 30 | 30 | ON  | 527.62  | ON  | 503.63  | ON  | 440.93 | ON  | 450.66  | ON  | 410.29  |
| 2741 | chrSm | lfp. SMC00681       | CDS  | 2894680   | 2895114 + | 30 | 30 | ON  | 353.5   | ON  | 323.58  | ON  | 377.46 | ON  | 361.37  | ON  | 402.4   |
| 2742 | chrSm | 7. SMC00680         | CDS  | 2895169   | 2896212 - | 30 | 30 | ON  | 453.05  | ON  | 431.48  | NIL | 371.48 | ON  | 371.32  | NIL | 407.34  |
| 2743 | chrSm | 7. SMC00679         | CDS  | 2896434   | 2897375 + | 30 | 30 | ON  | 368.61  | ON  | 437.88  | NIL | 357.12 | ON  | 370.29  | NIL | 318.16  |
| 2744 | chrSm | 7. SMC00678         | CDS  | 2897146   | 2898174 - | 30 | 30 | ON  | 345.87  | NIL | 302.93  | NIL | 323.58 | NIL | 316.65  | NIL | 347.45  |
| 2745 | chrSm | 7. SMC00677         | CDS  | 2898334   | 2901387 + | 30 | 30 | ON  | 312.81  | ON  | 320.6   | ON  | 336.62 | NIL | 332     | NIL | 332.34  |
| 2746 | chrSm | 7. SMC00676         | CDS  | 2901501   | 2902496 + | 30 | 30 | ON  | 379.79  | ON  | 368.67  | NIL | 357.15 | ON  | 357.15  | NIL | 357.57  |
| 2747 | chrSm | 7. SMC00675         | CDS  | 2902584   | 2905511 - | 30 | 30 | ON  | 398.5   | ON  | 377.59  | NIL | 330.61 | ON  | 353.19  | NIL | 334.19  |
| 2748 | chrSm | hucC. SMC00674      | CDS  | 2905545   | 2906288 - | 30 | 30 | ON  | 370.91  | ON  | 355.33  | NIL | 379.87 | ON  | 401.56  | NIL | 340.18  |
| 2749 | chrSm | 7. SMC00673         | CDS  | 2906417   | 2907802 + | 30 | 30 | ON  | 365.15  | ON  | 408.36  | NIL | 326.73 | ON  | 355.63  | NIL | 338.27  |
| 2750 | chrSm | hixX. SMC00672      | CDS  | 2907840   | 2908874 + | 30 | 30 | NIL | 304.42  | ON  | 350.6   | NIL | 366.62 | ON  | 366.62  | ON  | 334.45  |
| 2751 | chrSm | hixV. SMC00671      | CDS  | 2909011   | 2909868 + | 30 | 30 | NIL | 341.8   | NIL | 321.49  | NIL | 313.12 | ON  | 351.33  | NIL | 305.29  |
| 2752 | chrSm | hixV. SMC00670      | CDS  | 2909861   | 2910688 + | 30 | 30 | ON  | 309.77  | NIL | 319.15  | NIL | 311.99 | NIL | 302.15  | NIL | 343.84  |
| 2753 | chrSm | hufH2. SMC00669     | CDS  | 2910681   | 2912160 + | 30 | 30 | NIL | 295.29  | NIL | 303.49  | NIL | 311.17 | NIL | 329.5   | NIL | 340.05  |
| 2754 | chrSm | 7. SMC00668         | CDS  | 2912212   | 2913537 + | 31 | 31 | NIL | 379.96  | ON  | 453.91  | NIL | 318.36 | ON  | 436.96  | NIL | 344.45  |
| 2755 | chrSm | 7. SMC00667         | CDS  | 2913525   | 2914418 + | 30 | 30 | ON  | 324.85  | ON  | 407.43  | NIL | 327.12 | NIL | 321.02  | NIL | 321.02  |
| 2756 | chrSm | 7. SMC00666         | CDS  | 2914173   | 2914406 - | 30 | 30 | NIL | 305.05  | ON  | 329.88  | NIL | 315.92 | NIL | 340.48  | NIL | 330.49  |
| 2757 | chrSm | 7. SMC00665         | CDS  | 2914669   | 2914669 - | 30 | 30 | NIL | 276.69  | NIL | 273.29  | NIL | 292.88 | NIL | 286.27  | NIL | 314.08  |
| 2758 | chrSm | 7. SMC00664         | CDS  | 2914814   | 2915014 + | 30 | 30 | NIL | 265.49  | NIL | 263.79  | NIL | 254.36 | NIL | 258.84  | NIL | 279.25  |
| 2759 | chrSm | 7. SMC00663         | CDS  | 2915108   | 2915308 - | 33 | 33 | NIL | 299.6   | ON  | 379.96  | ON  | 442.73 | ON  | 352.93  | NIL | 356.73  |
| 2760 | chrSm | 7. SMC00662         | CDS  | 2915290   | 2915619 - | 30 | 30 | NIL | 310.49  | ON  | 460.57  | NIL | 343.95 | ON  | 356.59  | ON  | 390.67  |
| 2761 | chrSm | 7. SMC00661         | CDS  | 2915736   | 2915858 + | 36 | 8  | NIL | 379.72  | ON  | 379.72  | NIL | 381.32 | ON  | 371.98  | NIL | 335.83  |
| 2762 | chrSm | 7. SMC00660         | CDS  | 2916119   | 2916454 - | 30 | 30 | NIL | 260.9   | ON  | 328.37  | NIL | 282.48 | NIL | 246.55  | NIL | 280.82  |
| 2763 | chrSm | IRMAAET-5. SMC00758 | IRNA | 2917476   | 2917552 - | 30 | 30 | NIL | 291883  | NIL | 531.5   | NIL | 289.64 | NIL | 296.3   | NIL | 324.83  |
| 2764 | chrSm | 7. SMC00658         | CDS  | 2917487   | 2918830 - | 30 | 30 | NIL | 309.34  | NIL | 313.41  | NIL | 348.78 | ON  | 362.19  | NIL | 353.72  |
| 2765 | chrSm | 7. SMC00657         | CDS  | 2919147   | 2919890 - | 30 | 30 | NIL | 284.13  | NIL | 279.31  | NIL | 270.24 | NIL | 275.27  | NIL | 311.17  |
| 2766 | chrSm | 7. SMC00657         | CDS  | 2920299   | 2920574 + | 30 | 30 | ON  | 527.42  | ON  | 472.79  | NIL | 347.74 | ON  | 812.23  | NIL | 354.64  |
| 2767 | chrSm | 7. SMC00656         | CDS  | 2920725   | 2921006 + | 30 | 30 | ON  | 317.32  | ON  | 347.7   | NIL | 300.56 | NIL | 321.4   | NIL | 332.18  |
| 2768 | chrSm | 7. SMC00655         | CDS  | 2921179   | 2921529 - | 30 | 30 | ON  | 525.49  | ON  | 621.5   | ON  | 399.2  | ON  | 771.15  | ON  | 436.34  |
| 2769 | chrSm | cita. SMC00654      | CDS  | 2921529   | 2921529 - | 30 | 30 | ON  | 1247.13 | ON  | 1571.84 | ON  | 895.12 | ON  | 1419.99 | ON  | 471.88  |
| 2770 | chrSm | 7. SMC00653         | CDS  | 2923156   | 2923524 - | 30 | 30 | ON  | 431.72  | ON  | 421.62  | NIL | 381.49 | ON  | 550.36  | ON  | 408.75  |
| 2771 | chrSm | 7. SMC00652         | CDS  | 2923167   | 2924432 - | 30 | 30 | ON  | 669.71  | ON  | 641.77  | ON  | 482.09 | ON  | 700.86  | ON  | 471.88  |
| 2772 | chrSm | 7. SMC00651         | CDS  | 2924797   | 2925399 + | 30 | 30 | ON  | 523.48  | ON  | 631.62  | ON  | 512.41 | ON  | 800.61  | ON  | 603.01  |
| 2773 | chrSm | 7. SMC00650         | CDS  | 2925548   | 2926630 + | 30 | 30 | ON  | 427.65  | ON  | 354.42  | NIL | 372.69 | ON  | 421.32  | ON  | 383.42  |
| 2774 | chrSm | 7. SMC00649         | CDS  | 2926861   | 2927688 - | 30 | 30 | ON  | 347.38  | ON  | 336.59  | NIL | 360.31 | NIL | 317.21  | NIL | 317.21  |
| 2775 | chrSm | 7. SMC00648         | CDS  | 2927693   | 2928025 - | 30 | 30 | ON  | 449.13  | NIL | 308.19  | ON  | 411.38 | ON  | 374.16  | NIL | 353.29  |
| 2776 | chrSm | 7. SMC00647         | CDS  | 2929135   | 2929137 + | 30 | 30 | ON  | 464.65  | NIL | 343.3   | ON  | 427.91 | ON  | 406.53  | ON  | 384.71  |
| 2777 | chrSm | rpOH1. SMC00646     | CDS  | 2929335   | 2930240 + | 30 | 30 | ON  | 400.42  | ON  | 501.28  | NIL | 380.57 | ON  | 484.76  | ON  | 423.63  |
| 2778 | chrSm | 7. SMC00644         | CDS  | 2930371   | 2932632 - | 30 | 30 | ON  | 530.68  | ON  | 530.47  | ON  | 473.29 | ON  | 580.09  | ON  | 423.63  |
| 2779 | chrSm | purA. SMC00643      | CDS  | 2932696   | 2933994 - | 30 | 30 | ON  | 644.6   | ON  | 510.91  | ON  | 440.69 | ON  | 467.6   | NIL | 539.54  |
| 2780 | chrSm | 7. SMC00642         | CDS  | 2935089 + | 2935089 + | 30 | 30 | ON  | 334.03  | NIL | 302.52  | NIL | 295.2  | NIL | 292.52  | ON  | 356.728 |
| 2781 | chrSm | serA. SMC00641      | CDS  | 2935226   | 2936821 - | 30 | 30 | ON  | 644.5   | ON  | 556.63  | ON  | 408.72 | ON  | 426.01  | ON  | 465.48  |
| 2782 | chrSm | serC. SMC00640      | CDS  | 2936203   | 2938081 - | 30 | 30 | ON  | 608.96  | ON  | 541.73  | ON  | 419.36 | ON  | 483.05  | ON  | 385.82  |
| 2783 | chrSm | 7. SMC00639         | CDS  | 2938219   | 2938992 - | 30 | 30 | ON  | 400.92  | ON  | 400.25  | NIL | 356.97 | ON  | 373.17  | NIL | 375.71  |
| 2784 | chrSm | 7. SMC00638         | CDS  | 2939231   | 2940106 - | 30 | 30 | ON  | 460.8   | ON  | 666.84  | ON  | 437.81 | ON  | 559.05  | ON  | 477.4   |
| 2785 | chrSm | 7. SMC00637         | CDS  | 2940506   | 2941858 - | 30 | 30 | ON  | 435.77  | ON  | 583.44  | ON  | 442.76 | ON  | 476.98  | ON  | 380.43  |
| 2786 | chrSm | fsh. SMC04459       | CDS  | 2944119   | 2945119 - | 30 | 30 | ON  | 503.49  | ON  | 466.5   | ON  | 429.27 | ON  | 462.77  | ON  | 434.58  |
| 2787 | chrSm | 7. SMC02940         | CDS  | 2945592   | 2946580 - | 30 | 30 | ON  | 433.94  | ON  | 425.84  | ON  | 382.9  | ON  | 543.33  | NIL | 362.34  |
| 2788 | chrSm | 7. SMC02941         | CDS  | 2946629   | 2946629 - | 30 | 30 | ON  | 625.43  | ON  | 636.6   | ON  | 505.66 | ON  | 505.66  | ON  | 422.41  |
| 2789 | chrSm | pil. SMC02942       | CDS  | 2946921   | 2947851 - | 30 | 30 | ON  | 694.29  | ON  | 767.03  | ON  | 621.69 | ON  | 1039.02 | ON  | 533.12  |
| 2790 | chrSm | tolB. SMC04461      | CDS  | 2947617   | 2948927 - | 30 | 30 | ON  | 668.51  | ON  | 562.08  | ON  | 429.49 | ON  | 576.56  | ON  | 408.86  |
| 2791 | chrSm | tolA. SMC03956      | CDS  | 2948999   | 2950069 - | 30 | 30 | ON  | 409.73  | ON  | 409.73  | ON  | 382.91 | ON  | 397.61  | NIL | 326.5   |
| 2792 | chrSm | tolR. SMC03957      | CDS  | 2950078   | 2950530 - | 28 | 28 | ON  | 676.71  | ON  | 721.99  | NIL | 356.09 | ON  | 487.6   | ON  | 418.6   |
| 2793 | chrSm | tolC. SMC03958      | CDS  | 2950558   | 2951277 - | 30 | 30 | ON  | 568.95  | ON  | 666.44  | ON  | 429.35 | ON  | 610.48  | ON  | 413.7   |
| 2794 | chrSm | 7. SMC03959         | CDS  | 2951627   | 2954224 + | 30 | 30 | ON  | 358.36  | ON  | 409.31  | ON  | 459.42 | ON  | 440.67  | ON  | 393.12  |
| 2795 | chrSm | 7. SMC03960         | CDS  | 2954234   | 2954689 - | 30 | 30 | ON  | 316.98  | NIL | 306.19  | NIL | 373.14 | NIL | 330.32  | NIL | 307.78  |

[illegible]

|      |       |                    |      |           |           |    |    |     |         |     |        |     |        |     |        |     |        |
|------|-------|--------------------|------|-----------|-----------|----|----|-----|---------|-----|--------|-----|--------|-----|--------|-----|--------|
| 2868 | chrSm | 7: SMCO4034        | CDS  | 3037139   | 3038077 + | 30 | 30 | NIL | 304.15  | NIL | 307.47 | NIL | 282.69 | NIL | 288.96 | NIL | 316.5  |
| 2869 | chrSm | 7: SMCO4035        | CDS  | 3038074   | 3038925 + | 30 | 30 | NIL | 350.59  | NIL | 315.39 | NIL | 294.26 | NIL | 276.7  | NIL | 318.1  |
| 2870 | chrSm | 7: SMCO4036        | CDS  | 3038922   | 3040625 + | 30 | 30 | NIL | 329.46  | NIL | 305.71 | NIL | 309.37 | NIL | 329.63 | NIL | 311.98 |
| 2871 | chrSm | 7: SMCO4037        | CDS  | 3040644   | 3042158 + | 30 | 30 | NIL | 270.12  | NIL | 285.05 | NIL | 309.37 | NIL | 297.36 | NIL | 289.03 |
| 2872 | chrSm | TrnM17N: SMCO4038  | CDS  | 3042309   | 3043061 + | 54 | 0  | NIL | 369.92  | ON  | 385.4  | ON  | 337.89 | ON  | 372.3  | NIL | 325.98 |
| 2873 | chrSm | TrnM17C: SMCO4039  | CDS  | 3043119   | 3043643 + | 47 | 0  | ON  | 344.72  | ON  | 332.15 | ON  | 348.1  | ON  | 384.09 | NIL | 302.93 |
| 2874 | chrSm | lbpA: SMCO4040     | CDS  | 3043936   | 3044397 + | 30 | 30 | ON  | 429.17  | ON  | 409.08 | ON  | 409.36 | ON  | 294.11 | ON  | 287.12 |
| 2875 | chrSm | pilB: SMCO4041     | CDS  | 3044752   | 3046351 + | 30 | 30 | ON  | 429.17  | ON  | 406.87 | NIL | 354.53 | NIL | 411.22 | ON  | 374.68 |
| 2876 | chrSm | 7: SMCO4042        | CDS  | 3045172   | 3046531 - | 30 | 30 | ON  | 676.7   | ON  | 580.32 | ON  | 425.52 | ON  | 533.37 | NIL | 337.13 |
| 2877 | chrSm | 7: SMCO4043        | CDS  | 3046833   | 3047714 - | 30 | 30 | ON  | 363.87  | ON  | 399.93 | NIL | 310.78 | ON  | 423.89 | NIL | 337.13 |
| 2878 | chrSm | 7: SMCO4044        | CDS  | 3047905   | 3048267 + | 30 | 30 | ON  | 499.56  | ON  | 500.02 | NIL | 458.95 | ON  | 386.98 | ON  | 388.65 |
| 2879 | chrSm | IRNAAL-2: SMCO4060 | IRNA | 3048552   | 3048626 + | 30 | 30 | ON  | 429.19  | ON  | 800.44 | NIL | 349.45 | ON  | 528.33 | ON  | 448.86 |
| 2880 | chrSm | lrvD2: SMCO4045    | CDS  | 3050897   | 3050897 + | 30 | 30 | NIL | 288.01  | NIL | 283.56 | NIL | 326.33 | NIL | 319.42 | NIL | 328.03 |
| 2881 | chrSm | 7: SMCO4046        | CDS  | 3051070   | 3051474 - | 30 | 30 | NIL | 344.16  | ON  | 474.89 | NIL | 366.18 | NIL | 388.1  | NIL | 366.68 |
| 2882 | chrSm | azx2: SMCO4047     | CDS  | 3052186   | 3052629 - | 30 | 30 | ON  | 341.72  | ON  | 443.84 | NIL | 346.94 | ON  | 382.34 | NIL | 331.59 |
| 2883 | chrSm | 7: SMCO4048        | CDS  | 3052676   | 3053017 - | 30 | 30 | ON  | 332.28  | ON  | 443.84 | NIL | 442.73 | ON  | 457.78 | NIL | 425.25 |
| 2884 | chrSm | 7: SMCO4049        | CDS  | 3053090   | 3054289 - | 30 | 30 | ON  | 345.35  | ON  | 415.77 | ON  | 439.98 | ON  | 457.78 | NIL | 351.79 |
| 2885 | chrSm | 7: SMCO4050        | CDS  | 3054434   | 3055207 - | 30 | 30 | NIL | 274.35  | ON  | 323.93 | NIL | 306.52 | NIL | 386.59 | NIL | 323.15 |
| 2886 | chrSm | lpoE4: SMCO4051    | CDS  | 3055204   | 3055740 - | 30 | 30 | NIL | 268.01  | NIL | 305.21 | NIL | 259.54 | NIL | 274.36 | NIL | 317.31 |
| 2887 | chrSm | 7: SMCO4052        | CDS  | 3055890   | 3056336 - | 30 | 30 | ON  | 354.49  | ON  | 331.43 | NIL | 344.67 | ON  | 382.9  | NIL | 356.23 |
| 2888 | chrSm | 7: SMCO4053        | CDS  | 3056489   | 3056962 + | 30 | 30 | ON  | 366.55  | ON  | 375.43 | NIL | 331.42 | ON  | 367.83 | NIL | 356.23 |
| 2889 | chrSm | 7: SMCO4054        | CDS  | 3057168   | 3057929 + | 30 | 30 | ON  | 386.62  | ON  | 378.09 | NIL | 347.9  | ON  | 352.01 | NIL | 342.72 |
| 2890 | chrSm | 7: SMCO4055        | CDS  | 3057996   | 3058952 - | 30 | 30 | ON  | 576.61  | ON  | 464.9  | NIL | 436.13 | ON  | 402.44 | NIL | 370.36 |
| 2891 | chrSm | 7: SMCO4056        | CDS  | 3059058   | 3060092 + | 30 | 30 | ON  | 391.93  | ON  | 398.88 | NIL | 359.03 | ON  | 373.18 | NIL | 452.78 |
| 2892 | chrSm | 7: SMCO4057        | CDS  | 3060269   | 3062677 + | 30 | 30 | ON  | 427.98  | ON  | 427.78 | ON  | 390.05 | ON  | 380.24 | ON  | 326.52 |
| 2893 | chrSm | 7: SMCO4058        | CDS  | 3062692   | 3063570 + | 30 | 30 | ON  | 576.34  | ON  | 510.19 | ON  | 449.68 | ON  | 784.08 | ON  | 500.37 |
| 2894 | chrSm | 7: SMCO4059        | CDS  | 3063781   | 3065013 + | 30 | 30 | ON  | 440.76  | ON  | 477.36 | ON  | 390.56 | ON  | 351.09 | ON  | 405.56 |
| 2895 | chrSm | gigP: SMCO4460     | CDS  | 3065247   | 3067712 + | 30 | 30 | ON  | 352.92  | ON  | 346.39 | NIL | 343.16 | NIL | 336.63 | NIL | 379.49 |
| 2896 | chrSm | gigB1: SMCO3922    | CDS  | 3067709   | 3069919 + | 30 | 30 | ON  | 334.23  | ON  | 333.58 | NIL | 315.72 | NIL | 335.18 | NIL | 345.52 |
| 2897 | chrSm | gigC: SMCO3923     | CDS  | 3070033   | 3071295 + | 30 | 30 | ON  | 445.28  | ON  | 387.05 | NIL | 401.38 | ON  | 382.39 | NIL | 361.36 |
| 2898 | chrSm | gigA1: SMCO3924    | CDS  | 3071302   | 3072744 + | 30 | 30 | ON  | 504.32  | ON  | 549.53 | ON  | 407.89 | ON  | 424.63 | ON  | 424.63 |
| 2899 | chrSm | pgrM: SMCO3925     | CDS  | 3072407   | 3074377 + | 30 | 30 | ON  | 381.69  | ON  | 595.53 | ON  | 407.89 | ON  | 415.77 | NIL | 362.49 |
| 2900 | chrSm | gigX1: SMCO3926    | CDS  | 3074607   | 3076595 + | 30 | 30 | ON  | 366.79  | ON  | 345.43 | NIL | 255.7  | NIL | 367.06 | NIL | 364.49 |
| 2901 | chrSm | nodN2: SMCO3927    | CDS  | 3076748   | 3077236 + | 30 | 30 | ON  | 406.45  | ON  | 357.63 | ON  | 398.82 | ON  | 280.25 | NIL | 293.83 |
| 2902 | chrSm | 7: SMCO3928        | CDS  | 3077229   | 3078736 + | 30 | 30 | ON  | 395.26  | ON  | 421.99 | ON  | 374.57 | ON  | 379.91 | NIL | 374.57 |
| 2903 | chrSm | 7: SMCO3929        | CDS  | 3078322   | 3079497 - | 30 | 30 | ON  | 681.67  | ON  | 451.12 | ON  | 430.3  | ON  | 466.78 | NIL | 368.46 |
| 2904 | chrSm | soxG2-1: SMCO3930  | CDS  | 3079693   | 3080247 - | 31 | 31 | ON  | 452.93  | ON  | 345.64 | ON  | 427.07 | ON  | 407.69 | NIL | 413.87 |
| 2905 | chrSm | soxAD: SMCO3931    | CDS  | 3080240   | 3083233 - | 30 | 30 | ON  | 739.9   | ON  | 366.63 | NIL | 392.33 | ON  | 456.95 | NIL | 356.73 |
| 2906 | chrSm | soxJ2: SMCO3932    | CDS  | 3083571 - | 3083571 - | 30 | 30 | ON  | 618.37  | ON  | 400.51 | NIL | 371.8  | ON  | 418.94 | NIL | 352.69 |
| 2907 | chrSm | soxR2: SMCO3933    | CDS  | 3083686   | 3084939 - | 30 | 30 | ON  | 1246.65 | ON  | 466.83 | NIL | 344.54 | ON  | 411.9  | NIL | 347.57 |
| 2908 | chrSm | rsJ2: SMCO3934     | CDS  | 3085203   | 3085457 + | 30 | 30 | ON  | 618.37  | ON  | 466.83 | NIL | 333.95 | ON  | 627.48 | NIL | 389.77 |
| 2909 | chrSm | 7: SMCO3935        | CDS  | 3085645   | 3086532 + | 30 | 30 | ON  | 510.48  | ON  | 476.17 | ON  | 417.57 | ON  | 408.21 | ON  | 384.32 |
| 2910 | chrSm | 7: SMCO3936        | CDS  | 3086772   | 3087245 + | 30 | 30 | ON  | 371.78  | ON  | 334.02 | NIL | 346.33 | ON  | 356.9  | NIL | 291.34 |
| 2911 | chrSm | cydG1: SMCO3937    | CDS  | 3087353   | 3088624 + | 30 | 30 | ON  | 331.4   | ON  | 344.77 | ON  | 409.02 | ON  | 375.4  | NIL | 314.55 |
| 2912 | chrSm | pntB: SMCO3938     | CDS  | 3088832   | 3090232 - | 30 | 30 | ON  | 676.7   | ON  | 586.5  | NIL | 296.39 | ON  | 748.82 | NIL | 299.41 |
| 2913 | chrSm | pntAb: SMCO3939    | CDS  | 3090242   | 3090652 - | 30 | 30 | ON  | 459.43  | ON  | 409.79 | NIL | 328.92 | ON  | 510.06 | NIL | 299.41 |
| 2914 | chrSm | pntAb: SMCO3950    | CDS  | 3096544   | 3097802 - | 30 | 30 | ON  | 517.88  | ON  | 558.67 | ON  | 445.55 | ON  | 548.97 | NIL | 395.18 |
| 2915 | chrSm | 7: SMCO3941        | CDS  | 3092120   | 3092344 - | 30 | 30 | ON  | 650.69  | ON  | 409.49 | NIL | 332.03 | ON  | 385.08 | NIL | 326.34 |
| 2916 | chrSm | 7: SMCO3942        | CDS  | 3092547   | 3094868 - | 30 | 30 | NIL | 266.59  | NIL | 282.38 | NIL | 322.84 | NIL | 305.48 | NIL | 286.9  |
| 2917 | chrSm | 7: SMCO3943        | CDS  | 3095090   | 3095845 + | 31 | 31 | ON  | 434     | ON  | 436.45 | NIL | 318.11 | ON  | 365.2  | ON  | 386.42 |
| 2918 | chrSm | 7: SMCO4462        | CDS  | 3095842   | 3096789 + | 30 | 30 | ON  | 365.16  | ON  | 372.17 | NIL | 357.38 | ON  | 414.83 | NIL | 354.34 |
| 2919 | chrSm | pckR: SMCO2975     | CDS  | 3096884   | 3097909 - | 30 | 30 | ON  | 384.51  | ON  | 368.93 | NIL | 308.32 | ON  | 374.83 | NIL | 352.62 |
| 2920 | chrSm | 7: SMCO2976        | CDS  | 3098015   | 3098518 - | 30 | 30 | ON  | 336.12  | NIL | 312.84 | NIL | 322.24 | NIL | 322.24 | NIL | 334.17 |
| 2921 | chrSm | 7: SMCO2977        | CDS  | 3098632   | 3099423 + | 30 | 30 | ON  | 350.62  | ON  | 326.59 | ON  | 431.36 | ON  | 454.14 | NIL | 334.09 |
| 2922 | chrSm | 7: SMCO2978        | CDS  | 3099540   | 3100046 + | 30 | 30 | ON  | 607.1   | ON  | 512.82 | ON  | 405.64 | ON  | 457.59 | NIL | 368.54 |
| 2923 | chrSm | 7: SMCO2979        | CDS  | 3100711   | 3101700 + | 30 | 30 | ON  | 384.64  | ON  | 365.98 | NIL | 362.64 | ON  | 326.96 | NIL | 361.02 |
| 2924 | chrSm | 7: SMCO2980        | CDS  | 3101719   | 3102225 - | 30 | 30 | ON  | 344.28  | ON  | 333.06 | NIL | 302.44 | NIL | 336.97 | NIL | 327.21 |
| 2925 | chrSm | 7: SMCO2981        | CDS  | 3102503   | 3103138 + | 30 | 30 | ON  | 344.37  | ON  | 370.95 | NIL | 350.55 | NIL | 365.8  | NIL | 334.07 |
| 2926 | chrSm | 7: SMCO2982        | CDS  | 3103826   | 3103826 + | 30 | 30 | NIL | 302.47  | ON  | 371.51 | NIL | 334.09 | NIL | 286.23 | NIL | 284.39 |
| 2927 | chrSm | 7: SMCO2983        | CDS  | 3103932   | 3105051 - | 30 | 30 | ON  | 459.05  | ON  | 448.82 | ON  | 401.82 | ON  | 455.68 | ON  | 409.57 |
| 2928 | chrSm | 7: SMCO2984        | CDS  | 3105638   | 3106531 + | 30 | 30 | ON  | 365.98  | ON  | 376.95 | NIL | 315.52 | ON  | 345.7  | NIL | 323.15 |
| 2929 | chrSm | 7: SMCO2985        | CDS  | 3106651   | 3107295 + | 30 | 30 | ON  | 444.54  | ON  | 406.75 | ON  | 428.38 | ON  | 376.53 | NIL | 376.53 |
| 2930 | chrSm | 7: SMCO2986        | CDS  | 3107289   | 3108323 + | 30 | 30 | ON  | 430.61  | ON  | 443.52 | NIL | 348.69 | ON  | 366.98 | NIL | 372.14 |
| 2931 | chrSm | 7: SMCO2987        | CDS  | 3108891   | 3108891 - | 30 | 30 | ON  | 361.75  | ON  | 447.09 | NIL | 365.27 | ON  | 379.76 | NIL | 373.57 |
| 2932 | chrSm | 7: SMCO2988        | CDS  | 3108891   | 3109130 - | 30 | 30 | ON  | 374.3   | ON  | 339.11 | NIL | 340.07 | ON  | 374.61 | NIL | 341.98 |
| 2933 | chrSm | 7: SMCO2989        | CDS  | 3109312   | 3109514 - | 31 | 31 | ON  | 500.86  | ON  | 450.67 | NIL | 352.35 | ON  | 435.86 | NIL | 367.28 |
| 2934 | chrSm | 7: SMCO3151        | CDS  | 3109511   | 3110209 - | 30 | 30 | ON  | 377.67  | ON  | 385.93 | ON  | 445.17 | ON  | 459.94 | NIL | 363.86 |
| 2935 | chrSm | 7: SMCO3152        | CDS  | 3110327   | 3111031 - | 30 | 30 | ON  | 376.02  | ON  | 367.64 | NIL | 333.41 | ON  | 429.05 | NIL | 294.05 |
| 2936 | chrSm | 6dd2: SMCO3153     | CDS  | 3111273   | 3111911 - | 30 | 30 | ON  | 500.58  | ON  | 424.77 | ON  | 324.76 | ON  | 313.07 | NIL | 302.93 |
| 2937 | chrSm | 7: SMCO3154        | CDS  | 3112206   | 3112679 + | 30 | 30 | ON  | 327.2   | ON  | 397.51 | NIL | 333    | ON  | 366.46 | NIL | 302.41 |
| 2938 | chrSm | 7: SMCO3155        | CDS  | 3112676   | 3113578 + | 30 | 30 | ON  | 398.71  | ON  | 412.95 | ON  | 414.58 | ON  | 434.51 | NIL | 370.86 |
| 2939 | chrSm | 7: SMCO3156        | CDS  | 3114604 + | 3114604 + | 30 | 30 | ON  | 442.37  | ON  | 404.77 | ON  | 374.72 | ON  | 360.65 | NIL | 344.03 |

|            |                |     |           |           |    |    |     |        |     |        |     |        |     |        |     |        |
|------------|----------------|-----|-----------|-----------|----|----|-----|--------|-----|--------|-----|--------|-----|--------|-----|--------|
| 2940 chrSm | 2-SMC03157     | CDS | 3114744   | 3115520 - | 30 | 30 | ON  | 604.86 | ON  | 417.67 | ON  | 399.67 | ON  | 351.3  | NIL | 362.92 |
| 2941 chrSm | 2-SMC03158     | CDS | 3115559   | 3116224 - | 30 | 30 | ON  | 453.12 | ON  | 339.61 | NIL | 327.66 | ON  | 363.22 | NIL | 327.06 |
| 2942 chrSm | 2-SMC03159     | CDS | 3116291   | 3117290 - | 30 | 30 | ON  | 421.32 | ON  | 354.54 | ON  | 397.21 | ON  | 362.17 | NIL | 355.79 |
| 2943 chrSm | 2-SMC03160     | CDS | 3117628   | 3117904 - | 30 | 30 | ON  | 391.96 | ON  | 395.63 | NIL | 347.1  | ON  | 370.52 | NIL | 376.5  |
| 2944 chrSm | 2-SMC03161     | CDS | 3119261   | 3120445 - | 30 | 30 | ON  | 319.1  | ON  | 365.09 | NIL | 317.87 | NIL | 311.91 | NIL | 360.17 |
| 2945 chrSm | 2-SMC03162     | CDS | 3120653   | 3121705 - | 30 | 30 | ON  | 358.31 | ON  | 365.09 | NIL | 334.97 | NIL | 363.81 | NIL | 318.97 |
| 2946 chrSm | 2-SMC03163     | CDS | 3121898   | 3123208 - | 30 | 30 | ON  | 503.2  | ON  | 419.41 | NIL | 404    | ON  | 469.83 | NIL | 351.64 |
| 2947 chrSm | xyfB-SMC03164  | CDS | 3123303   | 3124573 - | 30 | 30 | ON  | 369.09 | ON  | 346.74 | ON  | 396.6  | ON  | 362.05 | NIL | 361.5  |
| 2948 chrSm | xyfB-SMC03165  | CDS | 3124303   | 3125804 - | 30 | 30 | ON  | 333.1  | ON  | 355    | NIL | 336.29 | ON  | 363.65 | NIL | 366.8  |
| 2949 chrSm | 2-SMC03166     | CDS | 3125900   | 3126985 - | 30 | 30 | ON  | 328.44 | NIL | 322.49 | NIL | 368.81 | NIL | 325.71 | NIL | 355.96 |
| 2950 chrSm | 2-SMC03167     | CDS | 3127155   | 3128744 - | 30 | 30 | ON  | 345.43 | ON  | 366.15 | NIL | 321.68 | ON  | 334.63 | NIL | 331.41 |
| 2951 chrSm | 2-SMC03168     | CDS | 3128773   | 3129921 - | 30 | 30 | ON  | 345.43 | ON  | 347.3  | ON  | 409.12 | ON  | 365.01 | NIL | 356.6  |
| 2952 chrSm | 2-SMC03169     | CDS | 3130227   | 3130937 - | 30 | 30 | ON  | 339.47 | ON  | 368.79 | ON  | 396.6  | ON  | 338.14 | ON  | 392.93 |
| 2953 chrSm | 2-SMC03170     | CDS | 3131057   | 3131896 + | 30 | 30 | ON  | 369.33 | ON  | 375.7  | NIL | 273.92 | NIL | 326.98 | NIL | 302.68 |
| 2954 chrSm | 2-SMC03171     | CDS | 3132063   | 3132815 + | 30 | 30 | ON  | 450.11 | ON  | 397.63 | NIL | 309.73 | NIL | 371.36 | NIL | 334.55 |
| 2955 chrSm | gltX-SMC03172  | CDS | 3133083   | 3134540 + | 30 | 30 | ON  | 658.46 | ON  | 395.3  | ON  | 392.2  | ON  | 406.7  | NIL | 351.03 |
| 2956 chrSm | lysS-SMC03173  | CDS | 3134551   | 3136047 + | 30 | 30 | ON  | 804.61 | ON  | 469.17 | ON  | 432.65 | ON  | 447.61 | ON  | 425.08 |
| 2957 chrSm | 2-SMC03174     | CDS | 3136217   | 3136837 - | 30 | 30 | ON  | 390.99 | ON  | 395.65 | ON  | 395.46 | ON  | 518.43 | ON  | 475.08 |
| 2958 chrSm | 2-SMC03175     | CDS | 3137037   | 3137990 + | 30 | 30 | ON  | 450.44 | ON  | 357.04 | NIL | 357.46 | ON  | 355.34 | NIL | 379.46 |
| 2959 chrSm | 2-SMC03176     | CDS | 3138173   | 3139183 + | 30 | 30 | ON  | 352.26 | ON  | 369.93 | NIL | 355.63 | NIL | 329.82 | NIL | 365.5  |
| 2960 chrSm | 2-SMC03177     | CDS | 3139187   | 3140800 + | 30 | 30 | NIL | 305.36 | NIL | 320.48 | NIL | 350.3  | NIL | 306.62 | NIL | 339.91 |
| 2961 chrSm | 2-SMC03178     | CDS | 3140940   | 3143588 + | 30 | 30 | ON  | 340.43 | ON  | 351.96 | NIL | 362.86 | ON  | 343.43 | NIL | 333.44 |
| 2962 chrSm | phaA1-SMC03179 | CDS | 3143729   | 3146728 + | 31 | 31 | ON  | 406.23 | ON  | 396.26 | NIL | 307.29 | NIL | 321.33 | NIL | 361.36 |
| 2963 chrSm | phaC1-SMC03180 | CDS | 3146728   | 3147075 + | 30 | 30 | ON  | 480.82 | ON  | 491.03 | ON  | 500.18 | ON  | 447.95 | ON  | 439.38 |
| 2964 chrSm | phaD1-SMC03181 | CDS | 3147068   | 3148687 + | 30 | 30 | ON  | 370.92 | ON  | 391.19 | NIL | 333.95 | ON  | 385.77 | NIL | 325.7  |
| 2965 chrSm | phaE1-SMC03182 | CDS | 3148690   | 3149175 + | 30 | 30 | ON  | 322.24 | NIL | 327.83 | NIL | 293.25 | NIL | 305.53 | NIL | 273.02 |
| 2966 chrSm | phaF1-SMC03183 | CDS | 3149172   | 3149453 + | 30 | 30 | ON  | 349.14 | ON  | 368.6  | NIL | 316.95 | ON  | 352.51 | NIL | 347.67 |
| 2967 chrSm | phaG1-SMC03184 | CDS | 3149450   | 3149815 + | 30 | 30 | ON  | 449.5  | ON  | 438.61 | NIL | 397.91 | ON  | 404.69 | NIL | 381.04 |
| 2968 chrSm | 2-SMC03185     | CDS | 3149816   | 3150028 - | 30 | 30 | ON  | 334.45 | ON  | 365.04 | ON  | 407.11 | ON  | 363.06 | ON  | 441.18 |
| 2969 chrSm | 2-SMC03186     | CDS | 3150721   | 3151653 + | 30 | 30 | ON  | 328.05 | ON  | 341.59 | ON  | 404.32 | ON  | 377.09 | NIL | 357.7  |
| 2970 chrSm | cdmM-SMC03187  | CDS | 3151698   | 3152456 - | 30 | 30 | ON  | 433.42 | ON  | 341.75 | NIL | 346.9  | ON  | 358.14 | NIL | 341.54 |
| 2971 chrSm | cdmL-SMC03188  | CDS | 3152495   | 3153736 - | 30 | 30 | ON  | 378.32 | NIL | 299.88 | ON  | 383.19 | NIL | 326.19 | NIL | 324.86 |
| 2972 chrSm | cdmK-SMC03189  | CDS | 3153705   | 3154505 + | 30 | 30 | ON  | 349.03 | ON  | 337.94 | ON  | 374.82 | ON  | 343.76 | NIL | 323.35 |
| 2973 chrSm | cdmJ-SMC03190  | CDS | 3154469   | 3154523 - | 30 | 30 | ON  | 449.23 | NIL | 283.89 | NIL | 326.65 | NIL | 297.41 | NIL | 282.31 |
| 2974 chrSm | cdmI-SMC03191  | CDS | 3155230   | 3155985 - | 30 | 30 | ON  | 701.23 | NIL | 380.57 | ON  | 409.16 | NIL | 413.12 | ON  | 414.18 |
| 2975 chrSm | cdmH-SMC03192  | CDS | 3155982   | 3156614 - | 30 | 30 | ON  | 418.88 | ON  | 357.09 | NIL | 355.37 | NIL | 324.61 | NIL | 332.42 |
| 2976 chrSm | cdmG-SMC03193  | CDS | 3156617   | 3157984 - | 30 | 30 | ON  | 353.28 | ON  | 332.06 | NIL | 347.05 | ON  | 393.8  | NIL | 330.83 |
| 2977 chrSm | cdmF-SMC03194  | CDS | 3158171   | 3158880 - | 30 | 30 | ON  | 414.1  | ON  | 349.24 | ON  | 438.67 | ON  | 389.96 | ON  | 429.76 |
| 2978 chrSm | ung-SMC03195   | CDS | 3159002   | 3159727 - | 30 | 30 | ON  | 327.27 | ON  | 358.31 | NIL | 435.1  | ON  | 354.31 | NIL | 354.38 |
| 2979 chrSm | modB-SMC03196  | CDS | 3159930   | 3160715 + | 30 | 30 | ON  | 465.12 | ON  | 427.32 | ON  | 450.97 | ON  | 384.98 | ON  | 405.97 |
| 2980 chrSm | modE-SMC03197  | CDS | 3160985   | 3161586 + | 30 | 30 | ON  | 432.74 | ON  | 365.25 | NIL | 350.87 | ON  | 378.68 | NIL | 336.96 |
| 2981 chrSm | modC-SMC03198  | CDS | 3161583   | 3162656 + | 30 | 30 | ON  | 329.76 | ON  | 321.59 | NIL | 350.41 | ON  | 362.3  | NIL | 352.67 |
| 2982 chrSm | 2-SMC03199     | CDS | 3162659   | 3163196 - | 30 | 30 | ON  | 344.74 | ON  | 334.65 | ON  | 394.38 | ON  | 375.37 | NIL | 368.22 |
| 2983 chrSm | 2-SMC03200     | CDS | 3163235   | 3164572 + | 30 | 30 | ON  | 338.08 | ON  | 331.59 | NIL | 356.29 | ON  | 342.67 | NIL | 326.76 |
| 2984 chrSm | bkdAB-SMC03201 | CDS | 3164896   | 3167143 + | 30 | 30 | ON  | 435.54 | ON  | 358.33 | ON  | 387    | ON  | 374.06 | NIL | 343.55 |
| 2985 chrSm | bkdAB-SMC03202 | CDS | 3167143   | 3168427 + | 30 | 30 | ON  | 433.51 | ON  | 362.2  | NIL | 357.94 | ON  | 380.47 | NIL | 343.95 |
| 2986 chrSm | bkdB-SMC03203  | CDS | 3168130   | 3169828 + | 30 | 30 | ON  | 499.35 | ON  | 358.16 | NIL | 328.43 | ON  | 380.47 | NIL | 331.9  |
| 2987 chrSm | lpdA3-SMC03204 | CDS | 3168434   | 3169828 + | 30 | 30 | ON  | 471.13 | ON  | 415.7  | ON  | 397.21 | ON  | 440.05 | NIL | 361.97 |
| 2988 chrSm | purU1-SMC03205 | CDS | 3170213   | 3171097 - | 30 | 12 | ON  | 689.45 | NIL | 291.17 | NIL | 288.36 | NIL | 294.22 | NIL | 278.19 |
| 2989 chrSm | maia-SMC03206  | CDS | 3171926   | 3171914 - | 30 | 30 | ON  | 402.7  | ON  | 404.32 | NIL | 357.71 | ON  | 328.03 | NIL | 327.68 |
| 2990 chrSm | 2-SMC03207     | CDS | 3171926   | 3172942 - | 30 | 30 | ON  | 400.75 | ON  | 394.6  | ON  | 406.42 | ON  | 440.25 | ON  | 388.38 |
| 2991 chrSm | hmpA-SMC03208  | CDS | 3171926   | 3174384 - | 30 | 30 | NIL | 298.07 | NIL | 300.79 | NIL | 306.24 | NIL | 292.61 | NIL | 260.37 |
| 2992 chrSm | 2-SMC03209     | CDS | 3174464   | 3174910 + | 30 | 30 | NIL | 291.98 | NIL | 389.73 | NIL | 336.64 | NIL | 309.21 | NIL | 331.92 |
| 2993 chrSm | 2-SMC03210     | CDS | 3174933   | 3175412 - | 30 | 30 | ON  | 318.13 | NIL | 284.82 | NIL | 267.26 | NIL | 300.51 | NIL | 286.31 |
| 2994 chrSm | 2-SMC03211     | CDS | 3175543   | 3176685 + | 30 | 30 | ON  | 335.82 | NIL | 307.07 | NIL | 367.27 | NIL | 334.88 | NIL | 302.42 |
| 2995 chrSm | 2-SMC03212     | CDS | 3176745   | 3177458 - | 30 | 30 | ON  | 344.07 | ON  | 361.84 | ON  | 382.07 | ON  | 404.01 | NIL | 374.47 |
| 2996 chrSm | 2-SMC03213     | CDS | 3178543   | 3179094 + | 30 | 30 | NIL | 302.61 | NIL | 307.71 | NIL | 321.65 | NIL | 309.27 | NIL | 290.86 |
| 2997 chrSm | 2-SMC03214     | CDS | 3179232   | 3181286 + | 30 | 30 | NIL | 291.71 | NIL | 297.88 | NIL | 344.37 | NIL | 329.71 | NIL | 292.46 |
| 2998 chrSm | 2-SMC03215     | CDS | 3181339   | 3183477 + | 30 | 30 | NIL | 316.54 | NIL | 344.08 | NIL | 297.93 | NIL | 318    | NIL | 303.1  |
| 2999 chrSm | 2-SMC03216     | CDS | 3183480   | 3184832 + | 30 | 30 | NIL | 265.28 | NIL | 295.5  | NIL | 333.83 | NIL | 291.96 | NIL | 327.68 |
| 3000 chrSm | 2-SMC03217     | CDS | 3184919   | 3185425 + | 30 | 30 | NIL | 306.25 | ON  | 244.66 | NIL | 344.18 | NIL | 283.73 | NIL | 297.33 |
| 3001 chrSm | 2-SMC03218     | CDS | 3185667   | 3186766 + | 30 | 30 | NIL | 513.89 | ON  | 469.65 | ON  | 383.12 | ON  | 344.79 | NIL | 414.82 |
| 3002 chrSm | 2-SMC03219     | CDS | 3186892   | 3187935 - | 30 | 30 | NIL | 307.11 | ON  | 459.25 | ON  | 320.82 | ON  | 535.44 | ON  | 418.82 |
| 3003 chrSm | 2-SMC03220     | CDS | 3188949 + | 3188949 + | 30 | 30 | NIL | 332.08 | ON  | 349.5  | NIL | 324.72 | ON  | 343.99 | NIL | 308.27 |
| 3004 chrSm | 2-SMC03221     | CDS | 3189307   | 3190356 + | 30 | 30 | ON  | 332.08 | ON  | 340.87 | NIL | 346.49 | ON  | 328.03 | NIL | 337.94 |
| 3005 chrSm | 2-SMC03222     | CDS | 3190546   | 3191277 - | 30 | 30 | ON  | 331.1  | ON  | 340.87 | NIL | 346.49 | ON  | 383.11 | NIL | 360    |
| 3006 chrSm | 2-SMC03223     | CDS | 3191496   | 3192509 + | 30 | 30 | ON  | 351.68 | NIL | 331.63 | NIL | 299.59 | NIL | 321.48 | NIL | 290.41 |
| 3007 chrSm | 2-SMC03224     | CDS | 3192589   | 3193401 + | 30 | 30 | ON  | 323.16 | NIL | 317.04 | NIL | 328.61 | NIL | 334.03 | NIL | 349.09 |
| 3008 chrSm | 2-SMC03225     | CDS | 3193423   | 3193884 - | 32 | 32 | ON  | 311.55 | NIL | 290.86 | NIL | 335.37 | NIL | 326.75 | NIL | 331.35 |
| 3009 chrSm | 2-SMC03226     | CDS | 3193881   | 3194126 - | 30 | 30 | NIL | 289.1  | NIL | 290.86 | NIL | 275.36 | NIL | 295.71 | NIL | 281.04 |
| 3010 chrSm | 2-SMC03227     | CDS | 3195030   | 3195030 - | 30 | 30 | ON  | 381.27 | ON  | 365.18 | ON  | 390.95 | ON  | 404.7  | NIL | 344.69 |
| 3011 chrSm | 2-SMC03228     | CDS | 3195045   | 3195926 - | 31 | 31 | ON  | 329.41 | ON  | 331.73 | NIL | 317.14 | NIL | 329.58 | NIL | 328.88 |

|            |                     |      |         |         |   |    |    |     |         |     |         |     |         |     |         |     |        |
|------------|---------------------|------|---------|---------|---|----|----|-----|---------|-----|---------|-----|---------|-----|---------|-----|--------|
| 3012 chrSm | 7: SMC03133         | CDS  | 3195916 | 3196887 | - | 30 | 30 | ON  | 342.9   | ON  | 322.48  | NIL | 307.98  | ON  | 337.96  | NIL | 325.86 |
| 3013 chrSm | ordL3: SMC03132     | CDS  | 3196905 | 3198188 | - | 30 | 30 | ON  | 336.7   | ON  | 373.8   | ON  | 403.9   | ON  | 418.1   | NIL | 352.47 |
| 3014 chrSm | 7: SMC03131         | CDS  | 3198252 | 3198979 | - | 30 | 30 | ON  | 333.22  | ON  | 380.37  | NIL | 364.85  | ON  | 406.03  | NIL | 334.77 |
| 3015 chrSm | 7: SMC03130         | CDS  | 3199470 | 3200378 | - | 30 | 30 | ON  | 367.87  | ON  | 394.53  | NIL | 345.82  | ON  | 385.53  | NIL | 350.52 |
| 3016 chrSm | 7: SMC03129         | CDS  | 3200446 | 3201213 | - | 30 | 30 | ON  | 322.56  | NIL | 297.86  | NIL | 357.14  | ON  | 308.15  | NIL | 303.27 |
| 3017 chrSm | 7: SMC03128         | CDS  | 3201226 | 3202107 | - | 30 | 30 | ON  | 333.78  | ON  | 348.36  | NIL | 355.79  | ON  | 319.68  | NIL | 305.03 |
| 3018 chrSm | 7: SMC03127         | CDS  | 3202125 | 3203051 | - | 31 | 31 | ON  | 314.13  | ON  | 289.88  | NIL | 332.9   | ON  | 346.33  | NIL | 332.9  |
| 3019 chrSm | 7: SMC03126         | CDS  | 3203043 | 3204046 | - | 30 | 30 | NIL | 297.9   | NIL | 284.29  | NIL | 364.47  | ON  | 357.44  | NIL | 354.68 |
| 3020 chrSm | 7: SMC03125         | CDS  | 3204043 | 3205056 | - | 30 | 30 | ON  | 399.64  | ON  | 391.8   | ON  | 431.33  | ON  | 417.73  | ON  | 387.93 |
| 3021 chrSm | 7: SMC03124         | CDS  | 3205056 | 3206778 | - | 30 | 30 | ON  | 315.91  | ON  | 330.64  | NIL | 355.38  | ON  | 346.41  | NIL | 337.71 |
| 3022 chrSm | 7: SMC03123         | CDS  | 3207160 | 3208107 | + | 30 | 30 | ON  | 349.24  | ON  | 408.24  | NIL | 351.64  | ON  | 441.67  | ON  | 331.2  |
| 3023 chrSm | IRNALET-3: SMC03075 | IRNA | 3208297 | 3208297 | - | 30 | 0  | ON  | 716.98  | ON  | 408.24  | NIL | 290.31  | ON  | 292.07  | NIL | 362.77 |
| 3024 chrSm | IRNALET-3: SMC03074 | IRNA | 3212310 | 3212385 | - | 30 | 0  | ON  | 408.32  | ON  | 408.24  | NIL | 290.31  | ON  | 292.07  | NIL | 362.77 |
| 3025 chrSm | IRNALET-3: SMC03073 | IRNA | 3212525 | 3212584 | - | 30 | 0  | ON  | 1407.95 | ON  | 566.82  | ON  | 761.23  | ON  | 627.49  | ON  | 535.29 |
| 3026 chrSm | 7: SMC03122         | CDS  | 3214897 | 3215844 | - | 30 | 30 | ON  | 368.56  | ON  | 346.43  | ON  | 384.1   | ON  | 335.87  | ON  | 390.39 |
| 3027 chrSm | 7: SMC03121         | CDS  | 3216094 | 3217299 | + | 30 | 30 | ON  | 329.91  | ON  | 339.9   | NIL | 304.51  | NIL | 345.4   | ON  | 399.77 |
| 3028 chrSm | 7: SMC03120         | CDS  | 3217311 | 3218099 | + | 30 | 30 | NIL | 284.19  | ON  | 294.39  | NIL | 308.45  | NIL | 302.59  | NIL | 278.59 |
| 3029 chrSm | 7: SMC03119         | CDS  | 3218096 | 3218797 | + | 30 | 30 | ON  | 305.28  | ON  | 287.12  | NIL | 336.18  | ON  | 334.79  | NIL | 337.18 |
| 3030 chrSm | 7: SMC03118         | CDS  | 3219688 | 3220682 | + | 30 | 30 | ON  | 340.2   | ON  | 333.64  | NIL | 271.03  | NIL | 293.85  | NIL | 297.36 |
| 3031 chrSm | 7: SMC03117         | CDS  | 3219690 | 3220682 | + | 30 | 30 | NIL | 278.61  | NIL | 285.2   | NIL | 257.86  | NIL | 293.85  | ON  | 292.59 |
| 3032 chrSm | 7: SMC03116         | CDS  | 3220730 | 3223225 | + | 30 | 30 | ON  | 345.44  | ON  | 391.05  | ON  | 418.33  | ON  | 422.04  | ON  | 383.35 |
| 3033 chrSm | 7: SMC03115         | CDS  | 3222557 | 3222832 | - | 35 | 0  | ON  | 1024.98 | ON  | 928.25  | ON  | 445.91  | ON  | 549.45  | ON  | 437.16 |
| 3034 chrSm | TRMS-C-2: SMC03115  | CDS  | 3222872 | 3224074 | - | 67 | 0  | ON  | 443.84  | ON  | 452.19  | ON  | 376.64  | ON  | 427.51  | ON  | 384.29 |
| 3035 chrSm | TRMS-2: SMC03114    | CDS  | 3223984 | 3225060 | - | 54 | 3  | ON  | 575.82  | ON  | 580.77  | ON  | 393.8   | ON  | 485.41  | ON  | 373.56 |
| 3036 chrSm | TRMS-2: SMC03113    | CDS  | 3229127 | 3229127 | - | 30 | 30 | ON  | 396.54  | ON  | 380.6   | NIL | 354.01  | ON  | 387.47  | ON  | 321.56 |
| 3037 chrSm | TRMS-N-2: SMC03112  | CDS  | 3229305 | 3230468 | - | 30 | 30 | ON  | 410.14  | ON  | 372.24  | ON  | 370.4   | ON  | 332.02  | NIL | 321.56 |
| 3038 chrSm | IRNALET-3: SMC03111 | CDS  | 3230479 | 3230973 | - | 30 | 30 | ON  | 439.86  | ON  | 386.23  | NIL | 271.9   | ON  | 291.89  | NIL | 308.83 |
| 3039 chrSm | IRNALET-3: SMC03110 | CDS  | 3231049 | 3231945 | - | 30 | 30 | ON  | 437.87  | ON  | 341.89  | ON  | 371.71  | ON  | 350.56  | NIL | 317.71 |
| 3040 chrSm | 7: SMC03109         | CDS  | 3232136 | 3232212 | + | 30 | 30 | ON  | 338.68  | ON  | 359.08  | NIL | 285.02  | NIL | 273.99  | NIL | 357.65 |
| 3041 chrSm | IRNAARG-1: SMC03076 | IRNA | 3232602 | 3233792 | + | 30 | 29 | ON  | 411.77  | ON  | 388.95  | ON  | 386.7   | NIL | 338.77  | NIL | 319.15 |
| 3042 chrSm | 7: SMC03108         | CDS  | 3234292 | 3235014 | + | 30 | 30 | ON  | 355.52  | ON  | 332.17  | ON  | 426.26  | NIL | 350.6   | NIL | 322.73 |
| 3043 chrSm | 7: SMC03107         | CDS  | 3235060 | 3235785 | - | 30 | 30 | ON  | 320.53  | ON  | 345.04  | ON  | 405.79  | ON  | 377.17  | NIL | 379.6  |
| 3044 chrSm | 7: SMC03106         | CDS  | 3235946 | 3237121 | + | 30 | 30 | ON  | 322.5   | NIL | 326.84  | NIL | 413.84  | NIL | 318.56  | NIL | 319.35 |
| 3045 chrSm | dr: SMC03105        | CDS  | 3237290 | 3238507 | - | 30 | 30 | ON  | 737.29  | ON  | 471.2   | ON  | 412.78  | ON  | 461.22  | ON  | 392.35 |
| 3046 chrSm | hema: SMC03104      | CDS  | 3238553 | 3239650 | - | 30 | 30 | ON  | 332.55  | ON  | 405.64  | NIL | 424.78  | ON  | 429.52  | NIL | 325.37 |
| 3047 chrSm | 7: SMC03103         | CDS  | 3239666 | 3242011 | - | 30 | 30 | NIL | 342.26  | ON  | 400.15  | NIL | 374.23  | ON  | 496.08  | NIL | 329.13 |
| 3048 chrSm | 7: SMC03102         | CDS  | 3242113 | 3242601 | - | 30 | 30 | NIL | 309.3   | ON  | 359.54  | ON  | 324.77  | ON  | 490.42  | NIL | 365.37 |
| 3049 chrSm | 7: SMC03101         | CDS  | 3243024 | 3243275 | + | 30 | 30 | ON  | 809.1   | ON  | 666.08  | ON  | 431.33  | ON  | 669.17  | ON  | 449.57 |
| 3050 chrSm | 7: SMC03100         | CDS  | 3243512 | 3245312 | - | 30 | 30 | ON  | 350.76  | ON  | 348.71  | NIL | 472.78  | ON  | 434.38  | NIL | 437.28 |
| 3051 chrSm | 7: SMC03099         | CDS  | 3245320 | 3246395 | + | 30 | 30 | NIL | 302.28  | NIL | 285.57  | NIL | 305.27  | NIL | 313.07  | NIL | 332.78 |
| 3052 chrSm | 7: SMC03098         | CDS  | 3246733 | 3248589 | + | 30 | 30 | ON  | 346.64  | ON  | 331.98  | NIL | 324.11  | ON  | 384.96  | NIL | 285.11 |
| 3053 chrSm | 7: SMC03097         | CDS  | 3248712 | 3254321 | + | 30 | 30 | ON  | 413.87  | ON  | 340.64  | NIL | 356.96  | ON  | 369.94  | NIL | 340.73 |
| 3054 chrSm | 7: SMC03096         | CDS  | 3254632 | 3254632 | + | 30 | 30 | NIL | 242.71  | NIL | 275.51  | NIL | 286.17  | NIL | 252.57  | NIL | 340.73 |
| 3055 chrSm | 7: SMC03095         | CDS  | 3254956 | 3255741 | + | 30 | 30 | ON  | 366.54  | ON  | 391.24  | NIL | 302.76  | NIL | 282.57  | NIL | 325.56 |
| 3056 chrSm | 7: SMC03094         | CDS  | 3255783 | 3256262 | - | 30 | 30 | ON  | 313.87  | NIL | 297.06  | NIL | 324.86  | NIL | 309.99  | NIL | 325.56 |
| 3057 chrSm | 7: SMC03093         | CDS  | 3256471 | 3256905 | - | 30 | 30 | NIL | 312.31  | NIL | 302.28  | NIL | 342.04  | ON  | 347.26  | NIL | 312.31 |
| 3058 chrSm | 7: SMC03092         | CDS  | 3257061 | 3257984 | + | 30 | 30 | ON  | 346.98  | NIL | 302.28  | NIL | 321.96  | NIL | 330.14  | NIL | 361.45 |
| 3059 chrSm | arg11: SMC03091     | CDS  | 3258162 | 3258641 | + | 30 | 30 | ON  | 350.56  | NIL | 310.58  | NIL | 284.2   | NIL | 331.76  | NIL | 350.49 |
| 3060 chrSm | cheW3: SMC03090     | CDS  | 3259273 | 3259273 | - | 88 | 0  | ON  | 522.1   | ON  | 426.79  | ON  | 425.71  | ON  | 459.45  | ON  | 364.46 |
| 3061 chrSm | TrnM11b-1: SMC03089 | CDS  | 3259273 | 3259273 | - | 41 | 0  | ON  | 967.09  | ON  | 511.59  | ON  | 476.16  | ON  | 653.14  | ON  | 465.21 |
| 3062 chrSm | TrnM11a-1: SMC03088 | CDS  | 3259976 | 3261757 | + | 30 | 30 | NIL | 284.18  | NIL | 299.73  | ON  | 406.68  | NIL | 384.46  | ON  | 379.28 |
| 3063 chrSm | mcpY: SMC03087      | CDS  | 3261902 | 3261902 | - | 30 | 30 | NIL | 315.93  | ON  | 267.64  | NIL | 270.73  | NIL | 270.73  | NIL | 322.53 |
| 3064 chrSm | IRNALET-3: SMC03086 | CDS  | 3261902 | 3263025 | - | 30 | 30 | ON  | 354.9   | ON  | 327.39  | NIL | 398.12  | NIL | 323.63  | NIL | 360.37 |
| 3065 chrSm | IRNALET-3: SMC03085 | CDS  | 3263153 | 3263925 | - | 30 | 30 | ON  | 543.5   | ON  | 423.53  | ON  | 390.81  | ON  | 459.01  | NIL | 354.33 |
| 3066 chrSm | IRNALET-3: SMC03084 | CDS  | 3266729 | 3267729 | - | 30 | 30 | ON  | 361.23  | ON  | 336.33  | NIL | 358.01  | ON  | 344.79  | NIL | 346.56 |
| 3067 chrSm | IRNALET-3: SMC03083 | CDS  | 3267729 | 3268205 | - | 30 | 30 | ON  | 372.79  | NIL | 307.44  | NIL | 358.01  | ON  | 344.79  | NIL | 346.56 |
| 3068 chrSm | IRNALET-3: SMC03082 | CDS  | 3268205 | 3268205 | - | 30 | 30 | ON  | 343.34  | ON  | 347.85  | NIL | 358.01  | ON  | 344.79  | NIL | 346.56 |
| 3069 chrSm | IRNALET-3: SMC03081 | CDS  | 3268205 | 3268205 | - | 30 | 30 | ON  | 343.34  | ON  | 347.85  | NIL | 358.01  | ON  | 344.79  | NIL | 346.56 |
| 3070 chrSm | IRNALET-3: SMC03080 | CDS  | 3268205 | 3268205 | - | 30 | 30 | ON  | 343.34  | ON  | 347.85  | NIL | 358.01  | ON  | 344.79  | NIL | 346.56 |
| 3071 chrSm | 7: SMC03079         | CDS  | 3269436 | 3271036 | - | 30 | 30 | ON  | 452.37  | ON  | 422.84  | NIL | 321.86  | ON  | 364.29  | NIL | 321.86 |
| 3072 chrSm | 7: SMC03078         | CDS  | 3270136 | 3271136 | + | 30 | 30 | ON  | 376.93  | ON  | 332.75  | NIL | 353.72  | ON  | 367.26  | NIL | 329.32 |
| 3073 chrSm | gIPR: SMC02521      | CDS  | 3271269 | 3272780 | + | 30 | 30 | ON  | 820.31  | ON  | 384.25  | ON  | 419.45  | ON  | 387.03  | NIL | 389.72 |
| 3074 chrSm | gIPD: SMC02520      | CDS  | 3272819 | 3273889 | + | 30 | 30 | ON  | 508.96  | ON  | 338.48  | NIL | 306.29  | ON  | 290.69  | NIL | 305.88 |
| 3075 chrSm | 7: SMC02519         | CDS  | 3273913 | 3274983 | + | 30 | 30 | ON  | 512.77  | NIL | 315.35  | NIL | 290.35  | ON  | 289.78  | NIL | 280.84 |
| 3076 chrSm | 7: SMC02518         | CDS  | 3274983 | 3275851 | + | 30 | 30 | ON  | 512.77  | NIL | 315.35  | NIL | 290.35  | ON  | 289.78  | NIL | 280.84 |
| 3077 chrSm | 7: SMC02517         | CDS  | 3275851 | 3276696 | + | 30 | 30 | ON  | 774.45  | ON  | 385.23  | NIL | 277.8   | NIL | 318.36  | NIL | 340.6  |
| 3078 chrSm | 7: SMC02516         | CDS  | 3276696 | 3277115 | + | 30 | 30 | ON  | 1509.95 | ON  | 460.25  | NIL | 372.99  | ON  | 597.77  | NIL | 360.6  |
| 3079 chrSm | 7: SMC02515         | CDS  | 3277115 | 3278921 | + | 30 | 30 | ON  | 1509.95 | ON  | 460.25  | NIL | 372.99  | ON  | 597.77  | NIL | 360.6  |
| 3080 chrSm | 7: SMC02514         | CDS  | 3278921 | 3280649 | + | 30 | 30 | ON  | 374.03  | ON  | 371.23  | ON  | 344.58  | ON  | 378.47  | NIL | 361.59 |
| 3081 chrSm | 7: SMC02513         | CDS  | 3280356 | 3282340 | + | 30 | 30 | ON  | 474.8   | ON  | 483.78  | NIL | 1320.54 | ON  | 2377.58 | ON  | 671.66 |
| 3082 chrSm | 7: SMC02512         | CDS  | 3282340 | 3283372 | + | 30 | 30 | ON  | 667.1   | ON  | 2140.05 | ON  | 769.94  | ON  | 968.94  | ON  | 671.66 |
| 3083 chrSm | IRNALET-3: SMC02511 | CDS  | 3283372 | 3284834 | + | 30 | 30 | ON  | 627.81  | ON  | 2140.05 | ON  | 769.94  | ON  | 968.94  | ON  | 671.66 |
| 3084 chrSm | IRNALET-3: SMC02510 | CDS  | 3284834 | 3286366 | + | 30 | 30 | ON  | 627.81  | ON  | 2140.05 | ON  | 769.94  | ON  | 968.94  | ON  | 671.66 |
| 3085 chrSm | IRNALET-3: SMC02509 | CDS  | 3286366 | 3288431 | + | 30 | 30 | ON  | 627.81  | ON  | 2140.05 | ON  | 769.94  | ON  | 968.94  | ON  | 671.66 |
| 3086 chrSm | IRNALET-3: SMC02508 | CDS  | 3288431 | 3290566 | + | 30 | 30 | ON  | 627.81  | ON  | 2140.05 | ON  | 769.94  | ON  | 968.94  |     |        |

|           |                   |     |         |           |     |    |     |         |     |         |     |        |     |         |     |        |
|-----------|-------------------|-----|---------|-----------|-----|----|-----|---------|-----|---------|-----|--------|-----|---------|-----|--------|
| 3087 chSm | sitC:SMC02507     | CDS | 3285763 | 3286620 + | 30  | 30 | ON  | 488.23  | ON  | 1003.05 | ON  | 485.87 | ON  | 625.4   | ON  | 410.06 |
| 3088 chSm | sitD:SMC02506     | CDS | 3286617 | 3287471 + | 30  | 30 | ON  | 507.55  | ON  | 1400.97 | ON  | 488.96 | ON  | 1025.21 | ON  | 508.64 |
| 3089 chSm | ?_SMC02505        | CDS | 3286700 | 3286584 + | 30  | 30 | ON  | 367.9   | ON  | 380.6   | ON  | 449.67 | ON  | 419.73  | ON  | 394.07 |
| 3090 chSm | ?_SMC02504        | CDS | 3286599 | 3289051 - | 30  | 30 | NIL | 280.13  | NIL | 263.79  | NIL | 320.63 | NIL | 314.65  | NIL | 341.99 |
| 3091 chSm | atpC:SMC02502     | CDS | 3289155 | 3290258 + | 30  | 30 | ON  | 538.33  | NIL | 298.47  | NIL | 522.98 | NIL | 310.47  | NIL | 312.36 |
| 3092 chSm | atpD:SMC02501     | CDS | 3290615 | 3291025 - | 30  | 30 | ON  | 950.8   | ON  | 488.89  | ON  | 522.98 | ON  | 530.21  | ON  | 430.41 |
| 3093 chSm | atpG:SMC02500     | CDS | 3291142 | 3293665 - | 30  | 30 | ON  | 1788.77 | ON  | 667.66  | ON  | 603.46 | ON  | 712.12  | ON  | 509.3  |
| 3094 chSm | atpG:SMC02500     | CDS | 3292681 | 3293565 - | 30  | 30 | ON  | 2015.98 | ON  | 333.33  | ON  | 562.93 | ON  | 657.91  | ON  | 529.36 |
| 3095 chSm | atpH:SMC02499     | CDS | 3295122 | 3295682 - | 31  | 31 | ON  | 1686.96 | ON  | 737.78  | NIL | 595.23 | ON  | 470.96  | NIL | 361.51 |
| 3096 chSm | atpH:SMC02498     | CDS | 3295927 | 3296313 - | 30  | 30 | ON  | 528.99  | ON  | 520.65  | ON  | 463.84 | ON  | 381.13  | NIL | 380.46 |
| 3097 chSm | prfA:SMC02496     | CDS | 3296436 | 3298577 - | 30  | 30 | ON  | 425.8   | ON  | 337     | ON  | 380.09 | ON  | 362.69  | NIL | 346.53 |
| 3098 chSm | ?_SMC02495        | CDS | 3298816 | 3299469 - | 30  | 30 | ON  | 931.67  | ON  | 660.71  | ON  | 508.29 | ON  | 378.07  | ON  | 499.06 |
| 3100 chSm | ?_SMC02494        | CDS | 3299550 | 3301079 - | 30  | 30 | NIL | 276.16  | NIL | 291.32  | NIL | 296.48 | NIL | 282.21  | NIL | 279.67 |
| 3101 chSm | ?_SMC02493        | CDS | 3301634 | 3302230 + | 30  | 30 | NIL | 302.44  | ON  | 355.81  | NIL | 362.63 | NIL | 405.29  | NIL | 313.94 |
| 3102 chSm | ?_SMC02492        | CDS | 3302227 | 3303396 + | 30  | 30 | NIL | 268.3   | NIL | 271.13  | NIL | 339.86 | NIL | 320.18  | NIL | 308.6  |
| 3103 chSm | ?_SMC02491        | CDS | 3303428 | 3304564 - | 30  | 30 | ON  | 412.37  | ON  | 363.1   | NIL | 354.06 | ON  | 397.56  | NIL | 349.96 |
| 3104 chSm | ?_SMC02490        | CDS | 3304574 | 3305497 - | 30  | 30 | ON  | 375.77  | ON  | 332.64  | NIL | 369.84 | ON  | 373.73  | NIL | 359.69 |
| 3105 chSm | ?_SMC02489        | CDS | 3306518 | 3306610 + | 30  | 30 | ON  | 363.94  | ON  | 410.96  | NIL | 356.15 | ON  | 409.93  | NIL | 385.91 |
| 3106 chSm | ?_SMC02488        | CDS | 3306832 | 3307908 + | 30  | 30 | ON  | 337.52  | ON  | 363.72  | NIL | 334.09 | ON  | 412.95  | NIL | 358.42 |
| 3107 chSm | lppd2:SMC02487    | CDS | 3308114 | 3309520 - | 30  | 30 | ON  | 736.38  | ON  | 575.97  | ON  | 474.06 | ON  | 412.95  | NIL | 447.64 |
| 3108 chSm | ?_SMC02486        | CDS | 3309557 | 3310309 - | 31  | 31 | ON  | 372.58  | ON  | 328.99  | NIL | 312.79 | NIL | 326.64  | NIL | 322.45 |
| 3109 chSm | ?_SMC02485        | CDS | 3310306 | 3310306 - | 30  | 30 | ON  | 456.93  | ON  | 375.99  | NIL | 415.92 | ON  | 414.65  | ON  | 392    |
| 3110 chSm | ?_SMC02484        | CDS | 3310806 | 3311450 - | 30  | 30 | ON  | 503.92  | ON  | 367.83  | NIL | 294.94 | NIL | 318.8   | NIL | 318.22 |
| 3111 chSm | sucB1:SMC02483    | CDS | 3311706 | 3312959 - | 30  | 30 | ON  | 621.34  | ON  | 517.35  | ON  | 406.65 | ON  | 489.26  | ON  | 441.01 |
| 3112 chSm | sucD:SMC02482     | CDS | 3313082 | 3316078 - | 30  | 30 | ON  | 656.12  | ON  | 456.88  | ON  | 457.82 | ON  | 560.9   | ON  | 412.49 |
| 3113 chSm | sucD:SMC02481     | CDS | 3316359 | 3317261 - | 30  | 30 | ON  | 1266.11 | ON  | 776.71  | ON  | 687.96 | ON  | 801.2   | ON  | 541.08 |
| 3114 chSm | sucC:SMC02480     | CDS | 3317268 | 3319844 - | 30  | 30 | ON  | 1489.19 | ON  | 941.2   | ON  | 751.23 | ON  | 1162.08 | ON  | 714.89 |
| 3115 chSm | msh:SMC02479      | CDS | 3318498 | 3319460 - | 30  | 30 | ON  | 979.82  | ON  | 648.04  | ON  | 697.24 | ON  | 758.13  | ON  | 570.15 |
| 3116 chSm | ?_SMC02478        | CDS | 3319643 | 3320797 - | 30  | 30 | ON  | 395.79  | ON  | 338.82  | NIL | 296.81 | NIL | 289.7   | NIL | 272.22 |
| 3117 chSm | ?_SMC02477        | CDS | 3320797 | 3321105 - | 30  | 30 | ON  | 471.4   | ON  | 376.95  | NIL | 367.2  | ON  | 362.02  | NIL | 315.79 |
| 3118 chSm | ?_SMC02476        | CDS | 3321113 | 3321391 - | 30  | 30 | ON  | 431.17  | ON  | 365.77  | NIL | 278.84 | NIL | 317.14  | NIL | 347.74 |
| 3119 chSm | ?_SMC02475        | CDS | 3321609 | 3322148 - | 30  | 30 | ON  | 791.84  | ON  | 649.26  | ON  | 379.97 | ON  | 584.81  | NIL | 431.94 |
| 3120 chSm | ?_SMC02474        | CDS | 3322344 | 3323414 - | 30  | 30 | ON  | 320.67  | NIL | 314.15  | NIL | 362.89 | NIL | 333.6   | NIL | 353.62 |
| 3121 chSm | ?_SMC02473        | CDS | 3323451 | 3324299 - | 31  | 31 | NIL | 278.65  | NIL | 269.5   | NIL | 270.91 | NIL | 257.91  | NIL | 297.79 |
| 3122 chSm | ?_SMC02472        | CDS | 3324292 | 3325230 - | 30  | 30 | NIL | 282.63  | NIL | 286.92  | NIL | 335.71 | NIL | 291.64  | NIL | 342.79 |
| 3123 chSm | ?_SMC02471        | CDS | 3325308 | 3326612 - | 30  | 30 | NIL | 293.56  | ON  | 335.72  | NIL | 358.07 | ON  | 374.37  | NIL | 341.41 |
| 3124 chSm | ?_SMC02470        | CDS | 3326844 | 3328049 + | 30  | 30 | ON  | 376.92  | ON  | 366.07  | NIL | 392.25 | NIL | 375.59  | NIL | 372.24 |
| 3125 chSm | ?_SMC02469        | CDS | 3328092 | 3329192 + | 30  | 30 | ON  | 356.71  | ON  | 344.78  | ON  | 358.66 | ON  | 370.75  | NIL | 367.38 |
| 3126 chSm | ?_SMC02468        | CDS | 3329222 | 3329863 + | 30  | 30 | ON  | 314.28  | NIL | 323.27  | NIL | 358.66 | ON  | 382.97  | NIL | 341.1  |
| 3127 chSm | msrA2:SMC02467    | CDS | 3330083 | 3330679 + | 30  | 30 | ON  | 344.71  | ON  | 440.13  | NIL | 352.5  | ON  | 389.48  | NIL | 334.48 |
| 3128 chSm | srbB:SMC02466     | CDS | 3330830 | 3331609 - | 30  | 30 | ON  | 842.23  | ON  | 561.67  | ON  | 611.66 | ON  | 797.74  | ON  | 549.45 |
| 3129 chSm | srbB:SMC02465     | CDS | 3331628 | 3333469 - | 30  | 30 | ON  | 680.19  | ON  | 497.69  | ON  | 439.3  | ON  | 604.71  | ON  | 421.67 |
| 3130 chSm | srdH:SMC02464     | CDS | 3333477 | 3333857 - | 30  | 30 | ON  | 967.64  | ON  | 358.67  | NIL | 316.76 | ON  | 376.9   | NIL | 303.81 |
| 3131 chSm | srdC:SMC02463     | CDS | 3333868 | 3334260 - | 30  | 30 | ON  | 603.97  | ON  | 684.09  | ON  | 589.5  | ON  | 1019.26 | ON  | 607.69 |
| 3132 chSm | ?_SMC0225         | CDS | 3334565 | 3335185 + | 30  | 30 | ON  | 365.84  | ON  | 435.34  | NIL | 365.38 | ON  | 397.38  | ON  | 436.93 |
| 3133 chSm | ?_SMC0227         | CDS | 3335825 | 3336544 - | 30  | 30 | ON  | 526.62  | ON  | 423.89  | ON  | 400.09 | ON  | 406.97  | ON  | 377.61 |
| 3134 chSm | ?_SMC0226         | CDS | 3336496 | 3336927 - | 30  | 30 | ON  | 524.34  | ON  | 438.27  | NIL | 301.7  | NIL | 308.85  | NIL | 326.45 |
| 3135 chSm | ?_SMC0228         | CDS | 3336934 | 3337227 - | 30  | 30 | ON  | 686.61  | ON  | 481.42  | NIL | 375.03 | ON  | 435.07  | NIL | 417.98 |
| 3136 chSm | gpaA:SMC03229     | CDS | 3337245 | 3338246 - | 30  | 30 | ON  | 372.24  | ON  | 396.14  | NIL | 356.64 | ON  | 362.17  | NIL | 357.33 |
| 3137 chSm | gpa:SMC03230      | CDS | 3338257 | 3339239 - | 30  | 30 | ON  | 447.27  | ON  | 394.83  | NIL | 357.56 | ON  | 369.97  | ON  | 383.58 |
| 3138 chSm | hncC:SMC03231     | CDS | 3339526 | 3340455 + | 30  | 30 | ON  | 414.59  | ON  | 365.81  | NIL | 367.32 | ON  | 403.92  | NIL | 373.55 |
| 3139 chSm | hncD:SMC03232     | CDS | 3340460 | 3341167 + | 30  | 30 | ON  | 330.24  | ON  | 328.75  | NIL | 377.88 | ON  | 368.64  | NIL | 313.76 |
| 3140 chSm | ?_SMC03233        | CDS | 3341387 | 3342703 + | 30  | 30 | ON  | 538.5   | ON  | 574.82  | ON  | 463.76 | ON  | 562.97  | ON  | 495.71 |
| 3141 chSm | ?_SMC03234        | CDS | 3342722 | 3344359 + | 30  | 30 | ON  | 444.27  | ON  | 510.64  | ON  | 422.61 | ON  | 418.85  | ON  | 393.67 |
| 3142 chSm | ?_SMC03235        | CDS | 3344395 | 3344874 + | 30  | 30 | ON  | 562.67  | ON  | 466.16  | ON  | 565.03 | ON  | 476.13  | ON  | 444.69 |
| 3143 chSm | ?_SMC03236        | CDS | 3344877 | 3345635 + | 30  | 30 | ON  | 447.57  | ON  | 448.24  | ON  | 498.82 | ON  | 476.37  | ON  | 413.83 |
| 3144 chSm | ?_SMC03237        | CDS | 3345813 | 3347060 - | 30  | 30 | ON  | 348.88  | ON  | 328.9   | NIL | 347.76 | NIL | 325.62  | NIL | 364.88 |
| 3145 chSm | ?_SMC03238        | CDS | 3347296 | 3347589 + | 30  | 30 | ON  | 332.05  | NIL | 293.69  | NIL | 233.02 | NIL | 321.6   | NIL | 278.53 |
| 3146 chSm | ppa:SMC03239      | CDS | 3347734 | 3348267 - | 30  | 30 | ON  | 1291.42 | ON  | 836.06  | ON  | 776.67 | ON  | 795.55  | ON  | 613.94 |
| 3147 chSm | ?_SMC03240        | CDS | 3348425 | 3349027 + | 30  | 30 | NIL | 291.79  | NIL | 296.88  | NIL | 319.6  | NIL | 303.66  | NIL | 327.4  |
| 3148 chSm | ?_SMC03241        | CDS | 3349074 | 3349580 - | 30  | 30 | NIL | 283.64  | ON  | 281.01  | NIL | 350.55 | ON  | 358.14  | ON  | 311.84 |
| 3149 chSm | bypA:SMC03242     | CDS | 3349924 | 3351750 - | 30  | 30 | ON  | 552.14  | ON  | 382.19  | NIL | 358.77 | ON  | 358.14  | ON  | 386.63 |
| 3150 chSm | ?_SMC03243        | CDS | 3351886 | 3353448 - | 30  | 30 | ON  | 366.43  | NIL | 323.7   | NIL | 368.47 | ON  | 379.19  | NIL | 346.79 |
| 3151 chSm | ?_SMC03244        | CDS | 3353605 | 3353826 - | 30  | 30 | NIL | 248.44  | NIL | 269.19  | NIL | 242.88 | NIL | 245.69  | NIL | 261.54 |
| 3152 chSm | ?_SMC03245        | CDS | 3353951 | 3355289 + | 30  | 30 | ON  | 342.56  | ON  | 404.9   | NIL | 344.67 | ON  | 358.24  | NIL | 389.56 |
| 3153 chSm | ?_SMC03746        | CDS | 3355320 | 3356481 - | 30  | 30 | ON  | 379.7   | NIL | 265.47  | NIL | 299    | NIL | 269.23  | ON  | 326.09 |
| 3154 chSm | ?_SMC03747        | CDS | 3355758 | 3356261 + | 30  | 30 | ON  | 346.88  | ON  | 331.53  | NIL | 377.74 | ON  | 347.23  | ON  | 382.84 |
| 3155 chSm | ?_SMC03748        | CDS | 3356403 | 3357227 - | 33  | 33 | ON  | 373.77  | NIL | 296.35  | NIL | 352.36 | NIL | 371.45  | NIL | 304.25 |
| 3156 chSm | Trn11b-2:SMC03312 | CDS | 3357224 | 3357883 - | 105 | 18 | ON  | 416.79  | ON  | 367.13  | ON  | 391.6  | ON  | 419.58  | ON  | 344.27 |
| 3157 chSm | Trn11a-2:SMC03313 | CDS | 3357817 | 3358224 - | 41  | 0  | ON  | 967.09  | ON  | 511.59  | ON  | 476.16 | ON  | 633.14  | ON  | 465.21 |
| 3158 chSm | ?_SMC03246        | CDS | 3358559 | 3359788 + | 30  | 30 | ON  | 448.59  | ON  | 480.81  | ON  | 383.85 | ON  | 431.72  | NIL | 316.58 |



|            |                     |      |           |           |    |    |     |         |     |         |     |        |     |        |     |        |
|------------|---------------------|------|-----------|-----------|----|----|-----|---------|-----|---------|-----|--------|-----|--------|-----|--------|
| 3231 chrSm | draE2, SMC03788     | CDS  | 3452510   | 3455860 - | 39 | 39 | ON  | 352.2   | ON  | 446.62  | NIL | 342.51 | ON  | 319.1  | NIL | 334.39 |
| 3232 chrSm | ? SMC03789          | CDS  | 3455857   | 3457470 - | 35 | 35 | ON  | 366.54  | ON  | 456.24  | NIL | 324.16 | ON  | 324.77 | NIL | 346.07 |
| 3233 chrSm | ? SMC03790          | CDS  | 3457313   | 3458293 - | 31 | 31 | ON  | 346.26  | ON  | 361.58  | NIL | 360.63 | ON  | 338.38 | NIL | 363.06 |
| 3234 chrSm | ? SMC03791          | CDS  | 3458436   | 3458870 + | 30 | 30 | ON  | 357.34  | ON  | 383     | NIL | 351.24 | ON  | 409.16 | NIL | 320.54 |
| 3235 chrSm | CHE, SMC03792       | CDS  | 3458955   | 3459161 - | 31 | 31 | ON  | 469.15  | ON  | 473.34  | ON  | 508.33 | ON  | 476.22 | NIL | 510.21 |
| 3236 chrSm | CHE, SMC03793       | CDS  | 3459158   | 3460060 - | 30 | 30 | ON  | 359.43  | ON  | 368.82  | NIL | 352.64 | ON  | 359.29 | NIL | 402.28 |
| 3237 chrSm | ? SMC03794          | CDS  | 3460182   | 3460343 + | 30 | 30 | ON  | 563.94  | ON  | 422.19  | NIL | 396.4  | ON  | 481.3  | NIL | 402.28 |
| 3238 chrSm | leuD, SMC03795      | CDS  | 3460581   | 3461186 + | 30 | 30 | ON  | 484.18  | ON  | 479.43  | ON  | 320.13 | ON  | 393.87 | NIL | 307.35 |
| 3239 chrSm | ? SMC03796          | CDS  | 3461195   | 3461575 + | 30 | 30 | ON  | 765.54  | ON  | 499.43  | ON  | 418.66 | ON  | 508.51 | ON  | 426.24 |
| 3240 chrSm | meia, SMC03797      | CDS  | 3461839   | 3462834 + | 30 | 30 | ON  | 364.39  | ON  | 350.12  | ON  | 390.39 | ON  | 390.39 | ON  | 327.03 |
| 3241 chrSm | galM, SMC03798      | CDS  | 3462931 + | 3463931 + | 30 | 30 | NIL | 391.23  | ON  | 456.08  | ON  | 384.31 | ON  | 371.43 | NIL | 359.17 |
| 3242 chrSm | ? SMC03799          | CDS  | 3464220   | 3465209 + | 30 | 30 | NIL | 294.95  | ON  | 326.32  | NIL | 280.31 | ON  | 312.44 | ON  | 326.71 |
| 3243 chrSm | IRNAGLY-1, SMC03902 | IRNA | 3465466   | 3465632 - | 30 | 30 | ON  | 504.64  | ON  | 619.4   | ON  | 949.57 | ON  | 690.16 | ON  | 812.7  |
| 3244 chrSm | ? SMC03800          | CDS  | 3465632   | 3466306 + | 30 | 30 | ON  | 483.48  | ON  | 407.48  | ON  | 381.33 | ON  | 378.48 | NIL | 368.94 |
| 3245 chrSm | ? SMC03801          | CDS  | 3466366   | 3467358 + | 30 | 30 | ON  | 559.09  | ON  | 407.48  | NIL | 387.83 | ON  | 406.21 | NIL | 332.83 |
| 3246 chrSm | ? SMC03802          | CDS  | 3467503   | 3468183 + | 30 | 30 | ON  | 343.64  | ON  | 353.04  | NIL | 276.56 | ON  | 305.83 | NIL | 330.58 |
| 3247 chrSm | ? SMC03803          | CDS  | 3468192   | 3468380 + | 30 | 30 | ON  | 477.58  | ON  | 530.48  | NIL | 276.56 | ON  | 305.83 | NIL | 330.58 |
| 3248 chrSm | ? SMC03804          | CDS  | 3468805   | 3470031 - | 30 | 30 | ON  | 416.89  | ON  | 391.48  | NIL | 345.02 | NIL | 336.74 | NIL | 344.67 |
| 3249 chrSm | tesB, SMC03805      | CDS  | 3471020   | 3471004 + | 30 | 30 | ON  | 352.3   | ON  | 394.77  | NIL | 320.33 | NIL | 396.18 | NIL | 342.54 |
| 3250 chrSm | glnK, SMC03806      | CDS  | 3471241   | 3471579 + | 30 | 30 | NIL | 270.17  | ON  | 263.56  | NIL | 320.33 | NIL | 379.78 | NIL | 339.71 |
| 3251 chrSm | amIB, SMC03807      | CDS  | 3471607   | 3472962 + | 30 | 30 | NIL | 330.77  | NIL | 308.39  | NIL | 330.6  | ON  | 278.49 | NIL | 293.45 |
| 3252 chrSm | tsk, SMC03808       | CDS  | 3473291   | 3475936 + | 32 | 29 | ON  | 437.13  | ON  | 441.05  | ON  | 412.86 | ON  | 435.35 | ON  | 422.96 |
| 3253 chrSm | ? SMC03809          | CDS  | 3476072   | 3476734 + | 30 | 30 | ON  | 363.68  | ON  | 374.12  | NIL | 324.87 | ON  | 436.06 | ON  | 307.05 |
| 3254 chrSm | ? SMC03810          | CDS  | 3476946   | 3477755 - | 30 | 30 | ON  | 382.82  | ON  | 347.57  | NIL | 366.63 | ON  | 355.68 | ON  | 385.16 |
| 3255 chrSm | ? SMC03811          | CDS  | 3477752   | 3478582 - | 31 | 31 | ON  | 359.99  | ON  | 340.33  | NIL | 357.57 | ON  | 363.9  | NIL | 340.95 |
| 3256 chrSm | ? SMC03812          | CDS  | 3478582   | 3479628 - | 30 | 30 | ON  | 339.99  | NIL | 318.31  | NIL | 327.22 | ON  | 325.93 | NIL | 327.22 |
| 3257 chrSm | ? SMC03813          | CDS  | 3480151   | 3481164 - | 30 | 30 | ON  | 360.75  | ON  | 427.71  | NIL | 401.4  | ON  | 431.48 | NIL | 366.68 |
| 3258 chrSm | ? SMC03814          | CDS  | 3481203   | 3482210 - | 30 | 30 | ON  | 351.82  | ON  | 332.05  | NIL | 324.99 | ON  | 363.06 | NIL | 290.02 |
| 3259 chrSm | ? SMC03815          | CDS  | 3482228   | 3483007 - | 30 | 30 | ON  | 353.95  | ON  | 356.66  | ON  | 495.09 | ON  | 396.14 | NIL | 374.04 |
| 3260 chrSm | ? SMC03816          | CDS  | 3483136   | 3484338 + | 30 | 30 | ON  | 332.19  | ON  | 371.43  | ON  | 400.93 | ON  | 453.89 | NIL | 377.2  |
| 3261 chrSm | ? SMC03817          | CDS  | 3484354   | 3485436 + | 30 | 30 | NIL | 292.51  | ON  | 304.64  | NIL | 304.64 | ON  | 453.89 | NIL | 300.86 |
| 3262 chrSm | XtH43, SMC03818     | CDS  | 3485252 + | 3486721 - | 30 | 30 | NIL | 511.27  | NIL | 293.28  | NIL | 328.79 | NIL | 295.33 | NIL | 326.03 |
| 3263 chrSm | ? SMC03819          | CDS  | 3486266   | 3486621 - | 30 | 30 | NIL | 277.65  | NIL | 300     | NIL | 275.92 | NIL | 262.73 | NIL | 303.17 |
| 3264 chrSm | ? SMC03820          | CDS  | 3486734   | 3487437 - | 30 | 30 | ON  | 401.99  | ON  | 450.97  | ON  | 453.97 | ON  | 404.25 | NIL | 363.22 |
| 3265 chrSm | ? SMC03821          | CDS  | 3487684   | 3488232 + | 30 | 30 | ON  | 332.96  | ON  | 340.76  | NIL | 425.43 | NIL | 404.25 | NIL | 363.22 |
| 3266 chrSm | ? SMC03822          | CDS  | 3488232   | 3488821 - | 30 | 30 | ON  | 399.84  | ON  | 381.28  | ON  | 442.38 | ON  | 405.89 | NIL | 316.85 |
| 3267 chrSm | leuG, SMC03823      | CDS  | 3488934   | 3490343 - | 30 | 30 | ON  | 349.81  | ON  | 379.58  | NIL | 368.03 | ON  | 346.23 | NIL | 318.85 |
| 3268 chrSm | ? SMC03824          | CDS  | 3490678   | 3491157 + | 30 | 30 | NIL | 272.38  | NIL | 294.55  | NIL | 329.11 | ON  | 299.25 | NIL | 323.69 |
| 3269 chrSm | ? SMC03825          | CDS  | 3491154   | 3492392 + | 30 | 30 | NIL | 298.11  | NIL | 309.48  | NIL | 273.96 | ON  | 306.91 | NIL | 292.47 |
| 3270 chrSm | argG, SMC03826      | CDS  | 3493455   | 3493672 - | 30 | 30 | ON  | 658     | ON  | 417.78  | NIL | 444.51 | ON  | 501.43 | ON  | 389.86 |
| 3271 chrSm | ? SMC03827          | CDS  | 3493885   | 3495426 + | 30 | 30 | ON  | 354.27  | ON  | 327.16  | NIL | 288.18 | ON  | 313.16 | NIL | 339.96 |
| 3272 chrSm | ? SMC03828          | CDS  | 3494660   | 3495454 - | 30 | 30 | ON  | 418.83  | ON  | 339.82  | NIL | 330.02 | ON  | 412.86 | NIL | 373.68 |
| 3273 chrSm | ? SMC03829          | CDS  | 3495451   | 3496302 - | 30 | 30 | ON  | 739.27  | ON  | 430.4   | NIL | 314.47 | ON  | 430.37 | ON  | 386.77 |
| 3274 chrSm | ? SMC03830          | CDS  | 3496500   | 3497453 - | 30 | 30 | ON  | 1257.42 | ON  | 765.48  | ON  | 633.71 | ON  | 836.95 | ON  | 571.62 |
| 3275 chrSm | ? SMC03831          | CDS  | 3497658   | 3498893 - | 30 | 30 | ON  | 366.17  | NIL | 320.38  | NIL | 329.65 | ON  | 364.21 | NIL | 329.56 |
| 3276 chrSm | ? SMC03832          | CDS  | 3499149   | 3499652 - | 30 | 30 | ON  | 677.61  | ON  | 605     | ON  | 491.09 | ON  | 845.63 | ON  | 491.76 |
| 3277 chrSm | ? SMC03833          | CDS  | 3500713   | 3500581 - | 30 | 30 | NIL | 307.56  | ON  | 353.78  | NIL | 321    | ON  | 360.89 | NIL | 329.73 |
| 3278 chrSm | pcdD, SMC03834      | CDS  | 3500713   | 3501027 - | 30 | 30 | ON  | 325.99  | ON  | 494.28  | NIL | 370.71 | ON  | 504.17 | NIL | 374.4  |
| 3279 chrSm | lgt, SMC03835       | CDS  | 3501158   | 3501860   | 30 | 30 | NIL | 534.67  | ON  | 784.25  | ON  | 431.18 | ON  | 504.17 | NIL | 384.27 |
| 3280 chrSm | tesA, SMC03836      | CDS  | 3502459 - | 3502459 - | 30 | 30 | NIL | 312.36  | ON  | 374.84  | NIL | 259.8  | ON  | 306.67 | NIL | 276.59 |
| 3281 chrSm | ? SMC03837          | CDS  | 3502572   | 3503291 + | 30 | 30 | ON  | 426.27  | ON  | 407.28  | NIL | 360.93 | ON  | 407.95 | NIL | 329.28 |
| 3282 chrSm | ? SMC03838          | CDS  | 3503288   | 3505879 + | 30 | 30 | ON  | 382.62  | ON  | 390.64  | NIL | 319.98 | ON  | 371.63 | NIL | 330.06 |
| 3283 chrSm | ? SMC03839          | CDS  | 3504126   | 3506843 + | 30 | 30 | ON  | 746.7   | ON  | 862.13  | ON  | 610.21 | ON  | 988.95 | ON  | 485.67 |
| 3284 chrSm | ? SMC03840          | CDS  | 3505899   | 3507546 + | 30 | 30 | ON  | 408.62  | ON  | 361.12  | NIL | 367.91 | ON  | 407.27 | NIL | 359.68 |
| 3285 chrSm | cdpY, SMC03841      | CDS  | 3507564   | 3508181 - | 30 | 30 | NIL | 310.31  | NIL | 303.52  | NIL | 323.64 | NIL | 291.75 | NIL | 291.22 |
| 3286 chrSm | ? SMC03842          | CDS  | 3508326   | 3508585 - | 31 | 31 | ON  | 342.82  | ON  | 397.38  | NIL | 356.47 | ON  | 364.2  | NIL | 361.08 |
| 3287 chrSm | ? SMC03843          | CDS  | 3508582   | 3508896 - | 30 | 30 | NIL | 271.16  | NIL | 311.15  | NIL | 309.63 | NIL | 297.13 | NIL | 318.22 |
| 3288 chrSm | ? SMC03844          | CDS  | 3509102   | 3509512 - | 30 | 30 | ON  | 427.06  | ON  | 1165.03 | ON  | 662.63 | ON  | 769.01 | ON  | 662.25 |
| 3289 chrSm | acnA, SMC03845      | CDS  | 3509641   | 3510659 - | 30 | 30 | ON  | 424.45  | ON  | 419.42  | ON  | 379.99 | ON  | 386.56 | ON  | 395.87 |
| 3290 chrSm | acnA, SMC03846      | CDS  | 3510902   | 3513592 - | 30 | 30 | ON  | 732.13  | ON  | 516.76  | ON  | 425.05 | ON  | 676.68 | ON  | 491.2  |
| 3291 chrSm | ccnB, SMC03847      | CDS  | 3513063   | 3514486 + | 30 | 30 | ON  | 396.29  | ON  | 451.88  | NIL | 301.72 | ON  | 368.62 | NIL | 357.41 |
| 3292 chrSm | ccnB, SMC03848      | CDS  | 3514483   | 3515142 + | 30 | 30 | NIL | 293.73  | NIL | 293.73  | NIL | 263.66 | NIL | 343.02 | NIL | 320.26 |
| 3293 chrSm | ccnB, SMC03849      | CDS  | 3515402   | 3515972 + | 31 | 31 | ON  | 418.18  | ON  | 449.87  | NIL | 354.81 | ON  | 379.51 | NIL | 339.62 |
| 3294 chrSm | ccnD, SMC03850      | CDS  | 3515969   | 3516145 + | 30 | 30 | ON  | 435.05  | ON  | 455.55  | NIL | 362.03 | ON  | 382.32 | NIL | 370.96 |
| 3295 chrSm | ccnG, SMC03851      | CDS  | 3516142   | 3516750 + | 30 | 30 | ON  | 450.87  | ON  | 507.56  | NIL | 358.04 | ON  | 385.67 | NIL | 329.78 |
| 3296 chrSm | ? SMC03852          | CDS  | 3516909   | 3517492 + | 31 | 31 | ON  | 358.73  | ON  | 395.91  | ON  | 399.59 | ON  | 373.01 | NIL | 337.62 |
| 3297 chrSm | ? SMC03853          | CDS  | 3517499   | 3518131 - | 30 | 30 | ON  | 578.09  | ON  | 523.87  | ON  | 390.71 | ON  | 476.22 | ON  | 437.84 |
| 3298 chrSm | ftsY, SMC03854      | CDS  | 3518229   | 3519875 - | 30 | 30 | ON  | 436.82  | ON  | 453.86  | ON  | 425.4  | ON  | 455.73 | ON  | 425.81 |
| 3299 chrSm | ? SMC03855          | CDS  | 3519890   | 3521164 - | 31 | 31 | ON  | 325.73  | NIL | 300.65  | ON  | 300.65 | ON  | 336.72 | NIL | 334.8  |
| 3300 chrSm | dapF, SMC03856      | CDS  | 3521161   | 3522081 - | 30 | 30 | ON  | 387.13  | NIL | 332.29  | ON  | 417.73 | ON  | 397.14 | ON  | 394.48 |
| 3301 chrSm | fts, SMC03857       | CDS  | 3522466   | 3524007 + | 30 | 30 | ON  | 518.21  | NIL | 323.08  | ON  | 395.04 | ON  | 418.13 | ON  | 388.29 |
| 3302 chrSm | pheA, SMC03858      | CDS  | 3524020   | 3524355 + | 30 | 30 | ON  | 867.77  | ON  | 588.54  | ON  | 467.47 | ON  | 576.36 | ON  | 442.17 |

|      |       |                  |     |         |           |    |    |     |         |         |     |        |     |         |     |        |
|------|-------|------------------|-----|---------|-----------|----|----|-----|---------|---------|-----|--------|-----|---------|-----|--------|
| 3303 | chrSm | rnpP-SMCO3859    | CD5 | 3524394 | 3524768 + | 30 | 30 | ON  | 3140.56 | 1256.8  | ON  | 775.43 | ON  | 749.7   | ON  | 550.03 |
| 3304 | chrSm | rnmM-SMCO3860    | CD5 | 3525494 | 3525470 + | 30 | 30 | ON  | 436.45  | 325.29  | NIL | 370.46 | ON  | 383.57  | ON  | 388.25 |
| 3305 | chrSm | trmD-SMCO3861    | CD5 | 3525478 | 3526200 + | 30 | 30 | ON  | 446.98  | 323.93  | NIL | 350.58 | ON  | 343.86  | ON  | 423.05 |
| 3306 | chrSm | ?-SMCO3862       | CD5 | 3526182 | 3526928 - | 30 | 30 | ON  | 328.3   | 297.94  | NIL | 278.28 | NIL | 296.35  | NIL | 309.23 |
| 3307 | chrSm | rplE-SMCO3863    | CD5 | 3527261 | 3527794 + | 30 | 30 | ON  | 2149.65 | 905.39  | ON  | 899.18 | ON  | 1073.79 | ON  | 698.86 |
| 3308 | chrSm | ?-SMCO3864       | CD5 | 3527921 | 3528730 + | 30 | 30 | ON  | 522.34  | 506.47  | ON  | 410.26 | ON  | 508.5   | ON  | 436.14 |
| 3309 | chrSm | ?-SMCO3865       | CD5 | 3528800 | 3529621 + | 30 | 30 | ON  | 395.65  | 332.77  | NIL | 298.88 | NIL | 309.72  | NIL | 307.8  |
| 3310 | chrSm | ?-SMCO3866       | CD5 | 3529672 | 3531513 - | 30 | 30 | ON  | 498.84  | 404.43  | ON  | 461.73 | ON  | 309.72  | NIL | 439.71 |
| 3311 | chrSm | ?-SMCO3867       | CD5 | 3531518 | 3532168 - | 30 | 30 | ON  | 428.35  | 410.71  | NIL | 353.43 | ON  | 342.99  | NIL | 342.99 |
| 3312 | chrSm | ?-SMCO3868       | CD5 | 3532246 | 3532758 - | 30 | 30 | ON  | 345.29  | 333.37  | ON  | 394.63 | ON  | 336.62  | NIL | 325.75 |
| 3313 | chrSm | ?-SMCO3869       | CD5 | 3533027 | 3534055 + | 30 | 30 | ON  | 461.52  | 398.24  | ON  | 751.81 | ON  | 642.89  | NIL | 325.75 |
| 3314 | chrSm | ?-SMCO3870       | CD5 | 3534087 | 3535694 + | 30 | 30 | NIL | 229.37  | 387.26  | NIL | 291.84 | ON  | 335.93  | NIL | 312.09 |
| 3315 | chrSm | ?-SMCO3871       | CD5 | 3535697 | 3536407 + | 30 | 30 | NIL | 280.38  | 306.97  | NIL | 319.68 | NIL | 311.1   | NIL | 328.02 |
| 3316 | chrSm | ?-SMCO3872       | CD5 | 3536747 | 3538240 + | 30 | 30 | ON  | 356.06  | 379.87  | NIL | 363.88 | ON  | 372.45  | NIL | 327.81 |
| 3317 | chrSm | rpoH2-SMCO3873   | CD5 | 3538506 | 3539345 - | 30 | 30 | ON  | 365.64  | 355.09  | NIL | 378.86 | ON  | 351.79  | NIL | 337.26 |
| 3318 | chrSm | ?-SMCO3874       | CD5 | 3539797 | 3540366 - | 30 | 30 | ON  | 1095.6  | 2743.48 | ON  | 754.86 | ON  | 922.18  | NIL | 922.18 |
| 3319 | chrSm | ?-SMCO3875       | CD5 | 3540776 | 3541114 - | 30 | 30 | ON  | 457.43  | 373.58  | NIL | 369.8  | ON  | 387.29  | ON  | 376.58 |
| 3320 | chrSm | ?-SMCO3876       | CD5 | 3541499 | 3541930 - | 30 | 30 | ON  | 537.75  | 490.57  | ON  | 414.55 | ON  | 414.1   | ON  | 405.36 |
| 3321 | chrSm | ?-SMCO3877       | CD5 | 3542246 | 3545026 - | 30 | 30 | ON  | 659.7   | 457.56  | ON  | 490.6  | ON  | 429.29  | NIL | 356.35 |
| 3322 | chrSm | phbB-SMCO3878    | CD5 | 3545701 | 3546426 - | 30 | 30 | ON  | 397.1   | 540.49  | ON  | 382.51 | ON  | 435.33  | ON  | 402.6  |
| 3323 | chrSm | phbA-SMCO3879    | CD5 | 3546544 | 3547725 - | 30 | 30 | ON  | 517.9   | 815.51  | ON  | 531.02 | ON  | 497.04  | ON  | 497.04 |
| 3324 | chrSm | ?-SMCO3880       | CD5 | 3547948 | 3548526 + | 30 | 30 | NIL | 275.68  | 428.64  | NIL | 336.62 | ON  | 454.76  | NIL | 296.64 |
| 3325 | chrSm | ppmF-SMCO3881    | CD5 | 3548600 | 3548785 - | 37 | 37 | NIL | 800.58  | 606.57  | ON  | 462.53 | ON  | 451.39  | ON  | 482.68 |
| 3326 | chrSm | gstH-SMCO3882    | CD5 | 3548949 | 3549596 - | 30 | 30 | ON  | 326.34  | 364.06  | ON  | 462.53 | ON  | 373.92  | NIL | 364.23 |
| 3327 | chrSm | mtfA-SMCO3883    | CD5 | 3549686 | 3550474 - | 30 | 30 | ON  | 335.31  | 350.65  | NIL | 318.04 | ON  | 352.57  | NIL | 285.96 |
| 3328 | chrSm | lspA-SMCO3884    | CD5 | 3550625 | 3551539 + | 30 | 30 | ON  | 344.2   | 380.38  | NIL | 287.55 | NIL | 281.28  | NIL | 323.86 |
| 3329 | chrSm | hsc22-SMCO3885   | CD5 | 3551544 | 3552599 + | 31 | 0  | ON  | 443.17  | 433.89  | NIL | 362.19 | NIL | 341.2   | ON  | 355.79 |
| 3330 | chrSm | Trm21-2-SMCO3886 | CD5 | 3552832 | 3553908 - | 30 | 30 | ON  | 603.26  | 433.89  | NIL | 437.66 | ON  | 457.59  | ON  | 410.95 |
| 3331 | chrSm | ?-SMCO3887       | CD5 | 3554360 | 3555007 + | 30 | 30 | ON  | 322.97  | 346.56  | NIL | 307.2  | NIL | 282.22  | NIL | 310.04 |
| 3332 | chrSm | gpeE-SMCO3888    | CD5 | 3556270 | 3556270 - | 30 | 30 | ON  | 467.94  | 421.96  | NIL | 362.03 | ON  | 420.43  | NIL | 350.81 |
| 3333 | chrSm | ?-SMCO3889       | CD5 | 3556440 | 3557579 - | 30 | 30 | ON  | 321.14  | 352.64  | NIL | 325.86 | NIL | 297.83  | NIL | 341.54 |
| 3334 | chrSm | ?-SMCO3890       | CD5 | 3557698 | 3558480 - | 30 | 30 | ON  | 353.12  | 377.85  | ON  | 419.92 | ON  | 366.08  | NIL | 377.02 |
| 3335 | chrSm | ?-SMCO3891       | CD5 | 3558751 | 3559524 + | 30 | 30 | ON  | 428.24  | 771.51  | ON  | 641.47 | ON  | 526.08  | ON  | 417.18 |
| 3336 | chrSm | Trm21-4-SMCO3892 | CD5 | 3559760 | 3560386 + | 31 | 0  | ON  | 603.26  | 433.89  | ON  | 437.66 | ON  | 457.59  | ON  | 457.59 |
| 3337 | chrSm | ?-SMCO3893       | CD5 | 3561068 | 3561748 + | 30 | 30 | ON  | 356.31  | 358.71  | NIL | 316.54 | NIL | 325.71  | ON  | 322.52 |
| 3338 | chrSm | pvc-SMCO3894     | CD5 | 3561748 | 3562506 + | 30 | 30 | ON  | 382.03  | 364.09  | ON  | 432.11 | NIL | 481.91  | ON  | 392.33 |
| 3339 | chrSm | pvc-SMCO3895     | CD5 | 3562521 | 3562979 - | 30 | 30 | ON  | 515.7   | 449.19  | ON  | 417.85 | ON  | 431.13  | ON  | 402.63 |
| 3340 | chrSm | Trm1b-2-SMCO3948 | CD5 | 3566370 | 3566924 - | 74 | 0  | ON  | 402.52  | 335.72  | ON  | 402.29 | ON  | 358.27  | NIL | 358.82 |
| 3341 | chrSm | Trm1a-2-SMCO3898 | CD5 | 3566939 | 3567767 - | 58 | 0  | ON  | 539.44  | 419.21  | ON  | 309.11 | ON  | 420.28  | ON  | 305.8  |
| 3342 | chrSm | ?-SMCO3899       | CD5 | 3568166 | 3568166 - | 30 | 30 | ON  | 733.65  | 737.84  | ON  | 378.18 | ON  | 462.62  | ON  | 438.07 |
| 3343 | chrSm | MDA-SMCO3900     | CD5 | 3568483 | 3568483 - | 30 | 30 | ON  | 655.97  | 539.8   | NIL | 329.97 | NIL | 329.97  | NIL | 329.97 |
| 3344 | chrSm | ?-SMCO3901       | CD5 | 3568721 | 3570571 + | 30 | 30 | ON  | 356.8   | 330.97  | NIL | 305.97 | NIL | 302.79  | NIL | 321.98 |
| 3345 | chrSm | ?-SMCO3901       | CD5 | 3570797 | 3571909 + | 30 | 30 | ON  | 407.16  | 408.02  | ON  | 379.9  | ON  | 367.15  | NIL | 350.25 |
| 3346 | chrSm | ?-SMCO3901       | CD5 | 3571967 | 3573124 - | 30 | 30 | ON  | 354.08  | 408.81  | NIL | 323.6  | ON  | 330.49  | NIL | 319.66 |
| 3347 | chrSm | ndvB-SMCO4382    | CD5 | 3573301 | 3581799 - | 30 | 30 | ON  | 442.55  | 434.17  | NIL | 375.48 | ON  | 383.55  | NIL | 369.18 |
| 3348 | chrSm | ?-SMCO4382       | CD5 | 3583240 | 3583133 - | 30 | 30 | ON  | 385.34  | 344.88  | NIL | 367.15 | ON  | 347.48  | NIL | 395.05 |
| 3349 | chrSm | ?-SMCO4383       | CD5 | 3583247 | 3584647 + | 30 | 30 | ON  | 393.32  | 367.62  | NIL | 366.54 | ON  | 360.41  | NIL | 342.56 |
| 3350 | chrSm | ?-SMCO4384       | CD5 | 3584658 | 3586079 + | 30 | 30 | ON  | 424.55  | 370.54  | NIL | 368.51 | ON  | 391.23  | NIL | 360.97 |
| 3351 | chrSm | ?-SMCO4385       | CD5 | 3586114 | 3587646 + | 30 | 30 | ON  | 420.9   | 350.22  | NIL | 314.33 | ON  | 350.54  | NIL | 299.48 |
| 3352 | chrSm | aatB-SMCO4386    | CD5 | 3587663 | 3588895 + | 30 | 30 | ON  | 416.52  | 302.51  | NIL | 348.6  | NIL | 322.03  | NIL | 347.77 |
| 3353 | chrSm | ?-SMCO4387       | CD5 | 3589084 | 3589632 - | 30 | 30 | ON  | 321.32  | 288.21  | NIL | 293.25 | ON  | 284.01  | NIL | 308.56 |
| 3354 | chrSm | ?-SMCO4388       | CD5 | 3589778 | 3591115 + | 30 | 30 | ON  | 427.3   | 299.56  | NIL | 317.63 | ON  | 317.12  | NIL | 297.67 |
| 3355 | chrSm | tuD1-SMCO4389    | CD5 | 3592561 | 3592561 - | 31 | 29 | ON  | 378.33  | 352.58  | NIL | 382.7  | ON  | 383.91  | NIL | 369.29 |
| 3356 | chrSm | ?-SMCO4390       | CD5 | 3592577 | 3594232 - | 30 | 30 | ON  | 314.9   | 323.66  | NIL | 297.49 | NIL | 298.62  | NIL | 283.98 |
| 3357 | chrSm | ?-SMCO4391       | CD5 | 3594231 | 3595211 - | 31 | 31 | NIL | 283.24  | 314.34  | NIL | 301.64 | NIL | 302.49  | NIL | 294.35 |
| 3358 | chrSm | ?-SMCO4392       | CD5 | 3595208 | 3596716 - | 30 | 30 | ON  | 425.68  | 350.51  | ON  | 473.46 | ON  | 391.82  | ON  | 270.26 |
| 3359 | chrSm | ?-SMCO4393       | CD5 | 3596725 | 3597837 - | 30 | 30 | ON  | 323.52  | 306.14  | NIL | 330.28 | ON  | 356.25  | NIL | 260.54 |
| 3360 | chrSm | ?-SMCO4394       | CD5 | 3597841 | 3598722 - | 30 | 30 | ON  | 338.24  | 338.24  | ON  | 311.06 | NIL | 314.47  | NIL | 316.63 |
| 3361 | chrSm | ?-SMCO4395       | CD5 | 3598722 | 3599600 - | 30 | 30 | NIL | 317.04  | 321.71  | NIL | 314.81 | NIL | 312.47  | NIL | 305.7  |
| 3362 | chrSm | ?-SMCO4396       | CD5 | 3599785 | 3601029 - | 30 | 30 | NIL | 358.2   | 356.73  | ON  | 355.63 | ON  | 347.52  | NIL | 327.63 |
| 3363 | chrSm | ?-SMCO4397       | CD5 | 3601190 | 3602704 - | 32 | 32 | NIL | 306.41  | 303.33  | ON  | 366.82 | NIL | 319.47  | NIL | 340.11 |
| 3364 | chrSm | ?-SMCO4398       | CD5 | 3602498 | 3603477 - | 30 | 30 | ON  | 334.03  | 338.81  | ON  | 407.93 | ON  | 400.77  | NIL | 380.12 |
| 3365 | chrSm | ?-SMCO4399       | CD5 | 3603470 | 3605092 - | 30 | 30 | ON  | 333.63  | 305.04  | ON  | 384.06 | ON  | 336.27  | NIL | 355.84 |
| 3366 | chrSm | ?-SMCO4400       | CD5 | 3605092 | 3606092 - | 31 | 31 | ON  | 318.87  | 343.47  | ON  | 387.04 | ON  | 347.55  | NIL | 324.08 |
| 3367 | chrSm | ?-SMCO4401       | CD5 | 3606090 | 3607133 - | 30 | 30 | NIL | 314.79  | 302.2   | NIL | 304.14 | NIL | 278.06  | NIL | 277.77 |
| 3368 | chrSm | ?-SMCO4402       | CD5 | 3607431 | 3608600 + | 30 | 30 | ON  | 333.77  | 367.06  | NIL | 359.8  | ON  | 375.24  | NIL | 362.4  |
| 3369 | chrSm | dep-SMCO4403     | CD5 | 3608819 | 3610882 - | 30 | 30 | ON  | 380.83  | 397.18  | ON  | 396.23 | ON  | 346.74  | ON  | 395.11 |
| 3370 | chrSm | ?-SMCO4404       | CD5 | 3610968 | 3611609 - | 30 | 30 | NIL | 270.87  | 365.42  | NIL | 275.34 | NIL | 283.19  | ON  | 314.92 |
| 3371 | chrSm | kuB-SMCO4405     | CD5 | 3611782 | 3612894 + | 30 | 30 | ON  | 675.79  | 562.06  | ON  | 443.86 | ON  | 529.89  | NIL | 510.33 |
| 3372 | chrSm | ?-SMCO4406       | CD5 | 3613023 | 3613730 + | 30 | 30 | ON  | 355.97  | 405.66  | ON  | 422.9  | ON  | 350.56  | NIL | 363.87 |
| 3373 | chrSm | ?-SMCO4407       | CD5 | 3613831 | 3615720 - | 30 | 30 | ON  | 373.61  | 405.66  | NIL | 334.33 | ON  | 908.95  | NIL | 332.49 |
| 3374 | chrSm | ?-SMCO4881       | CD5 | 3616239 | 3616643 - | 30 | 30 | NIL | 312.33  | 335.78  | NIL | 343.43 | NIL | 333.28  | NIL | 343.99 |

|      |       |                  |      |         |   |         |   |    |    |     |         |     |        |     |        |     |        |     |        |
|------|-------|------------------|------|---------|---|---------|---|----|----|-----|---------|-----|--------|-----|--------|-----|--------|-----|--------|
| 3375 | chrSm | ?_SMc04408       | CDS  | 3616640 | - | 3616900 | - | 30 | 30 | ON  | 327.54  | ON  | 377.57 | NIL | 304.15 | NIL | 274.35 | NIL | 337.85 |
| 3376 | chrSm | ?_SMc04409       | CDS  | 3617029 | - | 3617199 | - | 30 | 30 | ON  | 1780.81 | ON  | 1294   | NIL | 594.98 | ON  | 971.65 | NIL | 617.75 |
| 3377 | chrSm | asg:SMc04410     | CDS  | 3617313 | + | 3618347 | + | 30 | 30 | ON  | 522.56  | ON  | 393.99 | NIL | 347.42 | ON  | 365.84 | NIL | 346.83 |
| 3378 | chrSm | ?_SMc04411       | CDS  | 3618520 | - | 3619341 | + | 30 | 30 | ON  | 418.67  | ON  | 394.89 | NIL | 365.26 | NIL | 318.56 | NIL | 347.19 |
| 3379 | chrSm | cynt:SMc04083    | CDS  | 3619688 | - | 3620371 | - | 30 | 30 | ON  | 501.98  | ON  | 412.32 | NIL | 366.17 | NIL | 346.86 | NIL | 364.05 |
| 3380 | chrSm | pbkx:SMc04084    | CDS  | 3620545 | - | 3621426 | + | 30 | 30 | ON  | 379.98  | ON  | 344.29 | NIL | 363.88 | ON  | 354.96 | NIL | 363.4  |
| 3381 | chrSm | ?_SMc04085       | CDS  | 3621709 | + | 3622426 | + | 30 | 30 | ON  | 536.21  | ON  | 459.07 | NIL | 373.53 | ON  | 454.17 | NIL | 351.85 |
| 3382 | chrSm | purH:SMc04088    | CDS  | 3626622 | - | 3628013 | + | 30 | 30 | ON  | 377.07  | ON  | 393.1  | NIL | 329.84 | NIL | 367.34 | NIL | 323.19 |
| 3383 | chrSm | parB:SMc02801    | CDS  | 3629752 | - | 3629757 | - | 30 | 30 | ON  | 487.32  | ON  | 366.02 | NIL | 345.02 | NIL | 367.34 | NIL | 323.19 |
| 3384 | chrSm | ?_SMc04089       | CDS  | 3629899 | - | 3631524 | - | 30 | 30 | ON  | 463.24  | ON  | 387.14 | NIL | 352.46 | ON  | 362.26 | NIL | 355.73 |
| 3385 | chrSm | sun:SMc04090     | CDS  | 3631752 | - | 3633014 | - | 30 | 30 | ON  | 538.32  | ON  | 419.31 | NIL | 352.69 | ON  | 362.26 | NIL | 332.02 |
| 3386 | chrSm | hbpX:SMc04091    | CDS  | 3633164 | - | 3634123 | - | 30 | 30 | ON  | 328.41  | ON  | 344.41 | NIL | 349.95 | ON  | 373.35 | NIL | 352.91 |
| 3387 | chrSm | hpx:SMc04092     | CDS  | 3634254 | - | 3634508 | + | 30 | 30 | ON  | 361.44  | ON  | 390.02 | NIL | 364.27 | ON  | 374.21 | ON  | 384.1  |
| 3388 | chrSm | acsA1:SMc04093   | CDS  | 3634753 | - | 3636702 | - | 30 | 30 | ON  | 669.61  | ON  | 471.21 | NIL | 374.21 | ON  | 694.2  | NIL | 339.92 |
| 3389 | chrSm | ?_SMc04094       | CDS  | 3636984 | + | 3637678 | + | 30 | 30 | ON  | 709.76  | ON  | 467.72 | NIL | 409.61 | ON  | 516.51 | NIL | 415.76 |
| 3390 | chrSm | ?_SMc04095       | CDS  | 3637954 | - | 3639864 | - | 30 | 30 | ON  | 351.2   | ON  | 389.24 | NIL | 348.64 | ON  | 355.05 | NIL | 349.49 |
| 3391 | chrSm | ?_SMc02812       | CDS  | 3639974 | - | 3640633 | - | 30 | 30 | ON  | 370.82  | ON  | 353.98 | ON  | 409.17 | ON  | 377.34 | NIL | 343.41 |
| 3392 | chrSm | kuus:SMc02804    | CDS  | 3640898 | + | 3643528 | + | 30 | 30 | ON  | 495.03  | ON  | 405.38 | NIL | 357.26 | NIL | 409.17 | NIL | 331.13 |
| 3393 | chrSm | ?_SMc02803       | CDS  | 3643554 | + | 3644060 | + | 30 | 30 | ON  | 663.31  | ON  | 506.66 | NIL | 412.28 | ON  | 378.96 | NIL | 369.71 |
| 3394 | chrSm | ?_SMc02802       | CDS  | 3644514 | - | 3645104 | - | 30 | 30 | ON  | 350.52  | NIL | 315.77 | ON  | 439.74 | ON  | 430    | NIL | 376.9  |
| 3395 | chrSm | parB:SMc02801    | CDS  | 3645114 | - | 3646004 | - | 30 | 30 | ON  | 373.41  | ON  | 332.61 | NIL | 320.15 | NIL | 299.66 | NIL | 292.63 |
| 3396 | chrSm | para:SMc02800    | CDS  | 3646037 | - | 3646831 | - | 30 | 30 | ON  | 411.44  | ON  | 341.23 | NIL | 309.37 | NIL | 296.12 | NIL | 312.76 |
| 3397 | chrSm | glbB:SMc02799    | CDS  | 3646846 | - | 3647487 | - | 30 | 30 | ON  | 403.42  | ON  | 353.35 | NIL | 358.77 | ON  | 417.89 | ON  | 409.44 |
| 3398 | chrSm | gldA:SMc02798    | CDS  | 3647496 | - | 3649367 | - | 30 | 30 | ON  | 359.24  | ON  | 345.75 | NIL | 319.79 | NIL | 286.33 | NIL | 336.82 |
| 3399 | chrSm | thdF:SMc02797    | CDS  | 3649491 | - | 3650621 | - | 30 | 30 | ON  | 359.82  | ON  | 356.94 | ON  | 437.98 | ON  | 402.53 | ON  | 412.11 |
| 3400 | chrSm | rho:SMc02796     | CDS  | 3651162 | - | 3652427 | - | 30 | 30 | ON  | 579.64  | ON  | 394.51 | ON  | 417.7  | ON  | 377.11 | NIL | 343.38 |
| 3401 | chrSm | ?_SMc02795       | CDS  | 3652623 | - | 3653165 | - | 30 | 30 | ON  | 425.34  | NIL | 313.84 | NIL | 281.3  | NIL | 322.1  | NIL | 326.58 |
| 3402 | chrSm | heme:SMc02794    | CDS  | 3653176 | - | 3654135 | - | 30 | 30 | ON  | 499.19  | ON  | 407.76 | NIL | 346.37 | ON  | 374.45 | NIL | 356.45 |
| 3403 | psYma | fbG:SMa0002      | CDS  | 1353    | + | 4457    | + | 30 | 30 | ON  | 377.65  | ON  | 401.67 | ON  | 413.9  | ON  | 391.8  | ON  | 380.75 |
| 3404 | psYma | fbH:SMa0005      | CDS  | 4454    | + | 5446    | + | 32 | 32 | ON  | 353.27  | ON  | 327.06 | NIL | 345.24 | ON  | 385.16 | NIL | 352.19 |
| 3405 | psYma | fbD:SMa0007      | CDS  | 5424    | + | 6110    | + | 30 | 30 | NIL | 285.03  | NIL | 321.78 | NIL | 286.42 | NIL | 299.85 | NIL | 352.19 |
| 3406 | psYma | fbE:SMa0009      | CDS  | 6149    | + | 7069    | + | 30 | 30 | ON  | 339.22  | ON  | 412.18 | ON  | 396.42 | ON  | 390.58 | NIL | 378.82 |
| 3407 | psYma | seA:SMa0011      | CDS  | 7074    | + | 8474    | + | 30 | 30 | ON  | 322.37  | ON  | 335    | ON  | 399.9  | ON  | 361.37 | NIL | 360.81 |
| 3408 | psYma | ?_SMa0013        | CDS  | 8521    | - | 9255    | + | 30 | 30 | NIL | 307.62  | NIL | 289.59 | ON  | 424.61 | ON  | 430.72 | NIL | 317.63 |
| 3409 | psYma | seB:SMa0015      | CDS  | 9252    | + | 11252   | + | 30 | 30 | NIL | 340.72  | ON  | 352.62 | ON  | 430.72 | ON  | 399.23 | ON  | 373.24 |
| 3410 | psYma | ?_SMa0017        | CDS  | 11506   | + | 12063   | + | 30 | 30 | NIL | 296.93  | ON  | 376.64 | ON  | 424.61 | ON  | 373.53 | NIL | 362.56 |
| 3411 | psYma | ?_SMa0018        | CDS  | 12754   | + | 13161   | + | 53 | 0  | ON  | 1070.49 | ON  | 692.65 | ON  | 573.47 | ON  | 352.31 | NIL | 558.42 |
| 3412 | psYma | ?_SMa0020        | CDS  | 13227   | + | 13700   | + | 53 | 0  | ON  | 371.95  | ON  | 325.94 | NIL | 295.13 | ON  | 295.13 | ON  | 320.16 |
| 3413 | psYma | ?_SMa0021        | CDS  | 14450   | + | 15094   | - | 30 | 30 | NIL | 275.72  | NIL | 317.18 | ON  | 584.46 | NIL | 477.32 | ON  | 363.68 |
| 3414 | psYma | hRNAseic:SMa0022 | hRNA | 15716   | + | 15807   | + | 30 | 30 | ON  | 400.72  | ON  | 454.61 | ON  | 420.39 | ON  | 450.73 | ON  | 495.17 |
| 3415 | psYma | ?_SMa0025        | CDS  | 16251   | - | 17378   | - | 30 | 30 | ON  | 370.78  | ON  | 392.76 | NIL | 302.56 | ON  | 369.29 | NIL | 398.74 |
| 3416 | psYma | ?_SMa0026        | CDS  | 17424   | - | 17852   | - | 30 | 30 | ON  | 417.23  | ON  | 579.88 | NIL | 302.56 | ON  | 348.9  | ON  | 382.38 |
| 3417 | psYma | seD:SMa0028      | CDS  | 17865   | - | 18914   | - | 30 | 30 | ON  | 394.83  | NIL | 287.14 | NIL | 338.2  | ON  | 341.48 | NIL | 302.42 |
| 3418 | psYma | ?_SMa0031        | CDS  | 19209   | - | 19436   | - | 30 | 30 | ON  | 325.19  | NIL | 287.14 | NIL | 313.72 | ON  | 341.48 | NIL | 302.42 |
| 3419 | psYma | ?_SMa0034        | CDS  | 19453   | - | 19453   | - | 30 | 30 | ON  | 349.75  | NIL | 317.71 | NIL | 319.86 | ON  | 337.07 | NIL | 336.54 |
| 3420 | psYma | ?_SMa0036        | CDS  | 21429   | + | 23051   | + | 30 | 30 | ON  | 408.72  | NIL | 317.71 | NIL | 347.46 | ON  | 324.55 | NIL | 320.03 |
| 3421 | psYma | ?_SMa0039        | CDS  | 23398   | - | 24339   | - | 30 | 30 | ON  | 332.37  | NIL | 322.53 | NIL | 378.86 | ON  | 370.4  | NIL | 352.47 |
| 3422 | psYma | ?_SMa0041        | CDS  | 24465   | + | 25388   | + | 30 | 30 | NIL | 307.23  | NIL | 314.45 | NIL | 373.15 | NIL | 324.22 | ON  | 382.9  |
| 3423 | psYma | can:SMa0045      | CDS  | 25417   | - | 25683   | - | 30 | 30 | NIL | 434.23  | ON  | 563.85 | ON  | 447.73 | ON  | 586.24 | ON  | 454.94 |
| 3424 | psYma | ?_SMa0046        | CDS  | 25848   | - | 26597   | - | 30 | 30 | NIL | 300.4   | NIL | 304.72 | NIL | 334.08 | ON  | 367.71 | NIL | 328.16 |
| 3425 | psYma | ?_SMa0046        | CDS  | 26646   | + | 26996   | + | 30 | 30 | NIL | 212.39  | NIL | 260.45 | NIL | 262.92 | NIL | 262.95 | NIL | 277.32 |
| 3426 | psYma | ?_SMa0050        | CDS  | 27295   | + | 27507   | + | 31 | 31 | NIL | 296.22  | NIL | 305.47 | NIL | 330.12 | NIL | 320.81 | NIL | 354.32 |
| 3427 | psYma | ?_SMa0052        | CDS  | 27713   | + | 27713   | + | 30 | 30 | NIL | 221.53  | NIL | 258.06 | NIL | 218.1  | NIL | 224.46 | NIL | 279.85 |
| 3428 | psYma | ?_SMa0056        | CDS  | 28295   | - | 29428   | - | 30 | 30 | NIL | 310.83  | ON  | 330.67 | NIL | 358.76 | ON  | 395.3  | NIL | 374    |
| 3429 | psYma | ?_SMa0058        | CDS  | 29492   | - | 30688   | - | 30 | 30 | NIL | 276.04  | NIL | 303.99 | NIL | 290.39 | ON  | 379.49 | NIL | 310.2  |
| 3430 | psYma | ?_SMa0059        | CDS  | 30703   | - | 31488   | - | 30 | 30 | ON  | 337.28  | ON  | 354.59 | NIL | 326.57 | ON  | 444.13 | NIL | 371.57 |
| 3431 | psYma | ?_SMa0060        | CDS  | 31488   | - | 32423   | - | 30 | 30 | ON  | 330.97  | ON  | 373.23 | NIL | 341.52 | ON  | 389.55 | NIL | 325.23 |
| 3432 | psYma | ?_SMa0062        | CDS  | 32634   | + | 33323   | + | 30 | 30 | ON  | 369.44  | ON  | 346.03 | ON  | 462.46 | ON  | 434.36 | NIL | 330.04 |
| 3433 | psYma | ?_SMa0063        | CDS  | 33372   | + | 34187   | + | 30 | 30 | ON  | 325.89  | NIL | 298.16 | NIL | 435.62 | NIL | 333.37 | NIL | 353.09 |
| 3434 | psYma | ?_SMa0064        | CDS  | 34310   | + | 35392   | + | 30 | 30 | ON  | 436.86  | ON  | 442.56 | ON  | 395.78 | NIL | 333.37 | NIL | 366.81 |
| 3435 | psYma | ?_SMa0065        | CDS  | 35455   | + | 36147   | + | 30 | 30 | NIL | 266.77  | NIL | 299.07 | NIL | 302.39 | NIL | 298.5  | NIL | 313.99 |
| 3436 | psYma | ?_SMa0067        | CDS  | 36205   | + | 37167   | + | 30 | 30 | ON  | 312.43  | ON  | 334.78 | ON  | 309.63 | ON  | 371.11 | ON  | 307.99 |
| 3437 | psYma | ?_SMa0070        | CDS  | 37353   | + | 38336   | + | 30 | 30 | ON  | 375.52  | ON  | 411.58 | ON  | 372.97 | ON  | 455.98 | NIL | 358.7  |
| 3438 | psYma | ?_SMa0072        | CDS  | 38333   | + | 39064   | + | 30 | 30 | NIL | 284.09  | NIL | 299.27 | NIL | 297.67 | ON  | 282.17 | NIL | 287.1  |
| 3439 | psYma | ?_SMa0074        | CDS  | 39072   | + | 39830   | + | 30 | 30 | NIL | 266.54  | NIL | 304.36 | NIL | 316.37 | NIL | 311.04 | NIL | 312.04 |
| 3440 | psYma | ?_SMa0077        | CDS  | 39830   | + | 40717   | + | 30 | 30 | ON  | 340.54  | ON  | 392.85 | NIL | 346.33 | ON  | 344.2  | NIL | 317.02 |
| 3441 | psYma | ?_SMa0078        | CDS  | 40959   | + | 41981   | + | 30 | 30 | ON  | 338.3   | ON  | 383.7  | ON  | 349.78 | ON  | 360.84 | NIL | 340.5  |
| 3442 | psYma | ?_SMa0079        | CDS  | 42106   | + | 42774   | + | 30 | 30 | NIL | 286.41  | NIL | 265.27 | NIL | 253.36 | NIL | 282.07 | NIL | 266.81 |
| 3443 | psYma | ?_SMa0081        | CDS  | 42785   | + | 43441   | + | 30 | 30 | NIL | 290.9   | NIL | 273.07 | NIL | 307.7  | NIL | 286.75 | NIL | 275.88 |
| 3444 | psYma | ?_SMa0082        | CDS  | 43471   | + | 44286   | + | 30 | 30 | ON  | 370.28  | NIL | 418.34 | NIL | 315.51 | ON  | 510.66 | NIL | 346.84 |
| 3445 | psYma | ?_SMa0083        | CDS  | 44302   | + | 45081   | + | 30 | 30 | ON  | 335.86  | NIL | 303.24 | ON  | 375.95 | ON  | 402.23 | NIL | 386.19 |
| 3446 | psYma | ?_SMa0085        | CDS  | 45099   | + | 46052   | + | 30 | 30 | ON  | 372.89  | ON  | 334.82 | ON  | 383.7  | ON  | 361.3  | NIL | 370.39 |

|            |                  |     |         |          |    |    |     |        |     |        |     |        |     |        |     |        |
|------------|------------------|-----|---------|----------|----|----|-----|--------|-----|--------|-----|--------|-----|--------|-----|--------|
| 3447 pSyMA | ?_SMA0087        | CDS | 46069   | 46401 +  | 30 | 30 | ON  | 355.88 | ON  | 329.47 | ON  | 401.05 | ON  | 366.04 | NIL | 354.56 |
| 3448 pSyMA | ?_SMA0089        | CDS | 46684   | 47100 +  | 30 | 30 | ON  | 351.56 | ON  | 351.5  | NIL | 356.63 | ON  | 384.15 | NIL | 373.19 |
| 3449 pSyMA | ?_SMA0091        | CDS | 47925   | 47920 +  | 30 | 30 | ON  | 347.04 | ON  | 379.64 | NIL | 359.91 | ON  | 365.52 | NIL | 384.39 |
| 3450 pSyMA | ?_SMA0093        | CDS | 48182   | 49033 +  | 30 | 30 | ON  | 335.58 | ON  | 315.18 | NIL | 318.85 | ON  | 302.28 | NIL | 300.64 |
| 3451 pSyMA | ?_SMA0095        | CDS | 49084   | 50121 +  | 30 | 30 | ON  | 335.02 | ON  | 335.77 | ON  | 386.89 | ON  | 368.2  | NIL | 364.02 |
| 3452 pSyMA | ?_SMA0097        | CDS | 51038   | 51079 -  | 30 | 30 | ON  | 383.64 | ON  | 386.06 | ON  | 388.03 | ON  | 416.19 | ON  | 390.38 |
| 3453 pSyMA | ?_SMA0101        | CDS | 51262   | 52887 +  | 30 | 30 | ON  | 356.2  | ON  | 386.56 | NIL | 340    | ON  | 324.7  | NIL | 324.7  |
| 3454 pSyMA | ?_SMA0104        | CDS | 52944   | 54536 +  | 30 | 30 | ON  | 347.63 | ON  | 351.63 | NIL | 316.29 | ON  | 336.31 | NIL | 307.67 |
| 3455 pSyMA | ?_SMA0105        | CDS | 54624   | 55559 +  | 30 | 30 | ON  | 451.47 | ON  | 431.54 | NIL | 348.14 | ON  | 351.09 | NIL | 327.08 |
| 3456 pSyMA | ?_SMA0108        | CDS | 55656   | 56386 +  | 30 | 30 | ON  | 334.8  | ON  | 361.27 | NIL | 340.43 | ON  | 314.29 | NIL | 358.97 |
| 3457 pSyMA | ?_SMA0106        | CDS | 57297 + | 57297 +  | 30 | 30 | ON  | 309.81 | NIL | 303.87 | ON  | 388.73 | ON  | 312.62 | NIL | 348.45 |
| 3458 pSyMA | ?_SMA0110        | CDS | 57294   | 58256 +  | 30 | 30 | ON  | 382.13 | ON  | 378.7  | ON  | 458.69 | ON  | 439.04 | ON  | 380.7  |
| 3459 pSyMA | ?_SMA0112        | CDS | 58803   | 59234 -  | 30 | 30 | NIL | 268.43 | NIL | 257.36 | NIL | 246.68 | NIL | 242.23 | NIL | 302.34 |
| 3460 pSyMA | ?_SMA0113        | CDS | 59703   | 62262 +  | 30 | 30 | NIL | 337.74 | ON  | 367.32 | NIL | 372.56 | ON  | 358.93 | NIL | 367.67 |
| 3461 pSyMA | ?_SMA0114        | CDS | 62292   | 62654 +  | 30 | 30 | NIL | 303.31 | NIL | 310.09 | NIL | 317.11 | ON  | 344.44 | NIL | 322.29 |
| 3462 pSyMA | ?_SMA0116        | CDS | 63161   | 64117 +  | 30 | 30 | ON  | 354.15 | NIL | 375.81 | NIL | 352.16 | NIL | 335.42 | NIL | 380.74 |
| 3463 pSyMA | ?_SMA0117        | CDS | 64114   | 64452 +  | 30 | 30 | NIL | 251.61 | NIL | 276.43 | NIL | 267.21 | NIL | 267.21 | NIL | 290.66 |
| 3464 pSyMA | ?_SMA0118        | CDS | 64679   | 65206 +  | 30 | 30 | ON  | 337.38 | ON  | 387.66 | NIL | 339.32 | NIL | 322.97 | NIL | 316.03 |
| 3465 pSyMA | ?_SMA0121        | CDS | 65491   | 65658 -  | 30 | 30 | ON  | 396.8  | ON  | 573.27 | NIL | 339.32 | ON  | 371.11 | NIL | 327.53 |
| 3466 pSyMA | ?_SMA0123        | CDS | 65491   | 66112 -  | 30 | 30 | NIL | 257.44 | NIL | 261.1  | NIL | 315.53 | NIL | 266.81 | NIL | 280.14 |
| 3467 pSyMA | ?_SMA0124        | CDS | 66192   | 67826 -  | 30 | 29 | ON  | 326.05 | ON  | 307.93 | NIL | 329.63 | ON  | 341.53 | NIL | 330.36 |
| 3468 pSyMA | groEL3: SMA0124  | CDS | 67874   | 68191 -  | 30 | 30 | ON  | 335.33 | ON  | 347.85 | NIL | 339.62 | NIL | 300.31 | NIL | 342.61 |
| 3469 pSyMA | groES3: SMA0125  | CDS | 68805   | 69014 +  | 30 | 30 | ON  | 369.58 | NIL | 282.54 | NIL | 200.51 | NIL | 270.21 | NIL | 290.58 |
| 3470 pSyMA | ?_SMA0126        | CDS | 69515 + | 69515 +  | 30 | 30 | ON  | 643.54 | ON  | 408.78 | ON  | 385.68 | ON  | 440.62 | ON  | 392.86 |
| 3471 pSyMA | ?_SMA0128        | CDS | 69601   | 70668 +  | 30 | 30 | NIL | 414.54 | ON  | 308.22 | ON  | 400.62 | ON  | 340.75 | NIL | 344.48 |
| 3472 pSyMA | ?_SMA0130        | CDS | 70668   | 70965 +  | 30 | 30 | NIL | 309.48 | NIL | 361.61 | ON  | 319.59 | NIL | 321.62 | NIL | 350.56 |
| 3473 pSyMA | ?_SMA0132        | CDS | 70668   | 71977    | 30 | 30 | NIL | 324.14 | ON  | 337.31 | ON  | 413.62 | ON  | 376.12 | NIL | 344.73 |
| 3474 pSyMA | ?_SMA0134        | CDS | 71066   | 71671 -  | 30 | 30 | NIL | 297.59 | ON  | 319.17 | NIL | 327.23 | ON  | 317.46 | NIL | 342.05 |
| 3475 pSyMA | ?_SMA0136        | CDS | 74351   | 74286 +  | 30 | 30 | NIL | 307.81 | NIL | 282.51 | NIL | 272.14 | NIL | 320.91 | NIL | 293.06 |
| 3476 pSyMA | ?_SMA0137        | CDS | 76655   | 76579 +  | 30 | 30 | ON  | 330.95 | ON  | 429.73 | NIL | 296.87 | NIL | 301.47 | NIL | 339.48 |
| 3477 pSyMA | ?_SMA0139        | CDS | 76655   | 76975 -  | 30 | 30 | ON  | 322.51 | ON  | 351.24 | NIL | 340.92 | NIL | 351.56 | NIL | 315.56 |
| 3478 pSyMA | ?_SMA0142        | CDS | 77422   | 78822 -  | 30 | 30 | ON  | 322.51 | ON  | 351.24 | NIL | 340.92 | NIL | 351.56 | NIL | 315.56 |
| 3479 pSyMA | tpoE: SMA0143    | CDS | 78902   | 79507 +  | 30 | 30 | NIL | 365.69 | NIL | 322.03 | ON  | 428.44 | ON  | 351.48 | NIL | 333.19 |
| 3480 pSyMA | ?_SMA0144        | CDS | 79504   | 80289 +  | 30 | 30 | NIL | 299.44 | NIL | 317.62 | NIL | 371.18 | NIL | 324.6  | NIL | 334.78 |
| 3481 pSyMA | ?_SMA0146        | CDS | 80295   | 80819 -  | 32 | 28 | NIL | 256.13 | NIL | 272.31 | NIL | 294.65 | ON  | 328.78 | NIL | 341.75 |
| 3482 pSyMA | ?_SMA0148        | CDS | 80960   | 81673 -  | 30 | 30 | NIL | 290.9  | NIL | 296.66 | NIL | 374.25 | ON  | 372.44 | NIL | 327.95 |
| 3483 pSyMA | ?_SMA0149        | CDS | 81858   | 82340 +  | 30 | 30 | NIL | 294.36 | ON  | 340.92 | ON  | 395.86 | ON  | 359.23 | NIL | 348.44 |
| 3484 pSyMA | ?_SMA0150        | CDS | 82374   | 83900 -  | 31 | 31 | NIL | 271.93 | NIL | 281.13 | NIL | 327.18 | NIL | 293.45 | NIL | 305.49 |
| 3485 pSyMA | ?_SMA0151        | CDS | 83897   | 84977 -  | 30 | 30 | NIL | 315.74 | ON  | 342.76 | NIL | 301.35 | NIL | 335.38 | NIL | 308.93 |
| 3486 pSyMA | ?_SMA0155        | CDS | 86647   | 87216 -  | 30 | 30 | NIL | 263.72 | NIL | 279.04 | NIL | 267.2  | ON  | 269.47 | NIL | 292.2  |
| 3487 pSyMA | ?_SMA0157        | CDS | 87283   | 88287 -  | 30 | 30 | NIL | 311.79 | NIL | 320.96 | NIL | 329.29 | ON  | 397.89 | NIL | 363.62 |
| 3488 pSyMA | ?_SMA0160        | CDS | 88416   | 89090 +  | 30 | 30 | NIL | 290.5  | NIL | 300.24 | NIL | 293.25 | NIL | 309.36 | NIL | 363.62 |
| 3489 pSyMA | ?_SMA0162        | CDS | 89275   | 89460 -  | 30 | 30 | NIL | 284.74 | ON  | 320.24 | NIL | 293.25 | NIL | 244.39 | NIL | 278.56 |
| 3489 pSyMA | PIIC2: SMA0163   | CDS | 89495   | 90724 +  | 30 | 30 | ON  | 349.26 | ON  | 362.24 | NIL | 278.64 | NIL | 345.71 | NIL | 319    |
| 3490 pSyMA | ?_SMA0164        | CDS | 90721   | 91017 +  | 30 | 30 | ON  | 252.15 | ON  | 321.12 | ON  | 328.3  | ON  | 319.15 | NIL | 306.48 |
| 3491 pSyMA | ?_SMA0166        | CDS | 91039   | 91569 +  | 30 | 30 | NIL | 321.12 | ON  | 349.49 | NIL | 346.86 | ON  | 354.82 | NIL | 337.38 |
| 3492 pSyMA | ?_SMA0168        | CDS | 91653   | 92465 +  | 30 | 30 | NIL | 314.67 | ON  | 327.45 | NIL | 325.53 | NIL | 317.01 | NIL | 317.36 |
| 3493 pSyMA | ?_SMA0169        | CDS | 92526   | 93311 +  | 30 | 30 | NIL | 310.53 | NIL | 312.21 | NIL | 320.81 | NIL | 323.76 | NIL | 335.56 |
| 3494 pSyMA | ?_SMA0171        | CDS | 93492   | 94256 -  | 30 | 30 | ON  | 321.43 | ON  | 350.86 | NIL | 369.91 | ON  | 341.85 | NIL | 347.07 |
| 3495 pSyMA | ?_SMA0172        | CDS | 94473   | 95393 +  | 30 | 30 | NIL | 254.67 | NIL | 307.81 | NIL | 289.75 | NIL | 337.13 | NIL | 295.44 |
| 3496 pSyMA | ?_SMA0175        | CDS | 96871 - | 96871 -  | 30 | 30 | NIL | 258.56 | NIL | 265.66 | NIL | 281.12 | NIL | 261.57 | NIL | 291.38 |
| 3497 pSyMA | ?_SMA0179        | CDS | 98400   | 99317 -  | 30 | 30 | NIL | 310.39 | ON  | 342.68 | NIL | 284.88 | ON  | 288.27 | NIL | 276.86 |
| 3498 pSyMA | ?_SMA0180        | CDS | 99435   | 100307 + | 30 | 30 | ON  | 327.76 | ON  | 336.67 | ON  | 390.82 | ON  | 355.98 | ON  | 399.99 |
| 3499 pSyMA | CPAE: 2: SMA0181 | CDS | 100505  | 100708 - | 30 | 30 | NIL | 297.96 | ON  | 411.6  | NIL | 297.75 | NIL | 328.06 | NIL | 337.88 |
| 3500 pSyMA | ?_SMA0185        | CDS | 100964  | 102508 + | 30 | 30 | NIL | 303.98 | ON  | 386.09 | NIL | 264.25 | ON  | 334.19 | NIL | 288.77 |
| 3501 pSyMA | ?_SMA0187        | CDS | 102832  | 103602 + | 30 | 30 | NIL | 271.33 | NIL | 293.58 | NIL | 284.75 | NIL | 265.24 | NIL | 281.91 |
| 3502 pSyMA | ?_SMA0189        | CDS | 104028  | 104471 + | 30 | 30 | ON  | 335.64 | ON  | 363.92 | NIL | 315.09 | ON  | 341.64 | NIL | 368.02 |
| 3503 pSyMA | ?_SMA0190        | CDS | 104560  | 105189 + | 30 | 30 | ON  | 330.91 | NIL | 353.52 | NIL | 343.71 | NIL | 318.67 | NIL | 348.18 |
| 3504 pSyMA | ?_SMA0191        | CDS | 105799  | 106329 - | 31 | 31 | NIL | 278.49 | ON  | 338.84 | NIL | 305.07 | ON  | 360.74 | NIL | 354.62 |
| 3505 pSyMA | ?_SMA0193        | CDS | 106326  | 106592 - | 30 | 30 | NIL | 289.78 | ON  | 375.56 | ON  | 377.6  | ON  | 385.59 | NIL | 333.94 |
| 3506 pSyMA | ?_SMA0196        | CDS | 106949  | 107863 - | 30 | 30 | NIL | 317    | ON  | 324.85 | NIL | 392.48 | ON  | 341.79 | NIL | 323.19 |
| 3507 pSyMA | ?_SMA0197        | CDS | 107878  | 108744 - | 30 | 30 | NIL | 291.53 | NIL | 344.85 | NIL | 284.43 | NIL | 308.61 | NIL | 293.03 |
| 3508 pSyMA | ?_SMA0198        | CDS | 108822  | 109769 - | 31 | 31 | ON  | 348.97 | ON  | 409.76 | NIL | 298.68 | ON  | 338.95 | NIL | 330.1  |
| 3509 pSyMA | ?_SMA0199        | CDS | 109766  | 111229 - | 30 | 30 | ON  | 318.86 | ON  | 469.46 | ON  | 348.52 | ON  | 379.03 | NIL | 352.9  |
| 3510 pSyMA | ?_SMA0203        | CDS | 111288  | 112586 - | 30 | 30 | ON  | 329.7  | ON  | 420.55 | NIL | 348.52 | ON  | 375.55 | NIL | 339.06 |
| 3511 pSyMA | ?_SMA0204        | CDS | 112578  | 113825 + | 30 | 30 | ON  | 354.7  | ON  | 378.93 | NIL | 375.35 | ON  | 357.65 | ON  | 389.78 |
| 3512 pSyMA | ?_SMA0206        | CDS | 113822  | 114544 + | 30 | 30 | NIL | 298.75 | ON  | 329.83 | NIL | 397.93 | ON  | 347.72 | NIL | 327.2  |
| 3513 pSyMA | ?_SMA0209        | CDS | 115659  | 115757 + | 30 | 30 | NIL | 314.84 | NIL | 319.81 | ON  | 361.62 | ON  | 347.72 | NIL | 398.66 |
| 3514 pSyMA | ?_SMA0210        | CDS | 115852  | 116190 - | 30 | 30 | NIL | 255.08 | NIL | 256.64 | NIL | 247.35 | NIL | 238.07 | NIL | 264.01 |
| 3515 pSyMA | ?_SMA0211        | CDS | 116261  | 116455 - | 30 | 30 | NIL | 236.05 | NIL | 259.27 | NIL | 300.14 | NIL | 272.92 | NIL | 294.09 |
| 3516 pSyMA | Kdu1: SMA0214    | CDS | 116473  | 117653 - | 31 | 31 | NIL | 294.07 | NIL | 292.93 | NIL | 321.27 | NIL | 288.1  | NIL | 304    |
| 3517 pSyMA | ?_SMA0216        | CDS | 117547  | 118287 - | 31 | 31 | NIL | 266.47 | NIL | 268.05 | NIL | 273.47 | NIL | 279.05 | NIL | 306.03 |
| 3518 pSyMA | ?_SMA0217        | CDS | 118284  | 119231 - | 30 | 30 | ON  | 352.83 | ON  | 378.05 | NIL | 350.75 | NIL | 329.65 | NIL | 321.3  |

|      |       |               |     |        |        |   |    |    |     |        |     |        |     |        |     |        |     |        |
|------|-------|---------------|-----|--------|--------|---|----|----|-----|--------|-----|--------|-----|--------|-----|--------|-----|--------|
| 3519 | ψSymA | 7_SMA0218     | CDS | 119373 | 120230 | - | 30 | 30 | NIL | 288.23 | NIL | 289.87 | NIL | 344.2  | ON  | 347.18 | NIL | 304.32 |
| 3520 | ψSymA | 7_SMA0220     | CDS | 120444 | 121958 | - | 30 | 30 | NIL | 337.16 | NIL | 313.12 | NIL | 317.34 | ON  | 321.49 | NIL | 307.37 |
| 3521 | ψSymA | 7_SMA0222     | CDS | 120560 | 122778 | + | 30 | 30 | ON  | 343.84 | ON  | 335.76 | NIL | 338.95 | NIL | 307.2  | NIL | 345.38 |
| 3522 | ψSymA | 7_SMA0223     | CDS | 122852 | 123466 | - | 30 | 30 | ON  | 372.59 | ON  | 349.86 | ON  | 395.06 | ON  | 370.66 | ON  | 403.87 |
| 3523 | ψSymA | 7_SMA0224     | CDS | 123559 | 125061 | + | 30 | 30 | ON  | 317.13 | ON  | 334.6  | NIL | 286.32 | NIL | 283.23 | NIL | 300.03 |
| 3524 | ψSymA | 7_SMA0226     | CDS | 125174 | 126253 | + | 30 | 30 | ON  | 330.69 | ON  | 327.31 | NIL | 372.83 | NIL | 336.1  | NIL | 343.06 |
| 3525 | ψSymA | gdbA_SMA0228  | CDS | 126420 | 127766 | + | 30 | 30 | ON  | 372.59 | NIL | 278.68 | ON  | 409.76 | ON  | 335.76 | ON  | 415.48 |
| 3526 | ψSymA | 7_SMA0229     | CDS | 128057 | 128507 | + | 30 | 30 | ON  | 373.18 | ON  | 412.43 | ON  | 392.26 | ON  | 449.97 | ON  | 352.72 |
| 3527 | ψSymA | 7_SMA0232     | CDS | 128613 | 129805 | + | 30 | 30 | NIL | 370.8  | ON  | 386.4  | ON  | 415.12 | NIL | 351.74 | ON  | 414.91 |
| 3528 | ψSymA | otsA_SMA0233  | CDS | 129300 | 130691 | - | 30 | 30 | NIL | 288.87 | NIL | 288.74 | NIL | 335.51 | NIL | 305.37 | NIL | 331.78 |
| 3529 | ψSymA | 7_SMA0235     | CDS | 131106 | 132984 | - | 30 | 30 | ON  | 326.1  | ON  | 345.26 | NIL | 307.75 | ON  | 363.44 | NIL | 326.8  |
| 3530 | ψSymA | 7_SMA0237     | CDS | 133771 | 133774 | - | 30 | 30 | ON  | 441.66 | ON  | 381.55 | ON  | 395.26 | ON  | 472.42 | ON  | 412.1  |
| 3531 | ψSymA | 7_SMA0241     | CDS | 132893 | 133771 | - | 30 | 30 | ON  | 399.63 | ON  | 450.78 | ON  | 322.8  | ON  | 409.84 | NIL | 334.24 |
| 3532 | ψSymA | 7_SMA0244     | CDS | 134949 | 134949 | + | 30 | 30 | ON  | 337    | ON  | 347.2  | NIL | 350.6  | ON  | 335.92 | NIL | 372.56 |
| 3533 | ψSymA | 7_SMA0246     | CDS | 136418 | 137119 | + | 30 | 30 | NIL | 306.35 | NIL | 299.22 | NIL | 350.6  | NIL | 288.19 | NIL | 327.13 |
| 3534 | ψSymA | 7_SMA0247     | CDS | 137290 | 138486 | + | 30 | 30 | ON  | 559.8  | ON  | 462.04 | NIL | 336.28 | ON  | 484.51 | ON  | 385.2  |
| 3535 | ψSymA | 7_SMA0249     | CDS | 138487 | 139020 | + | 30 | 30 | ON  | 383.94 | NIL | 324.1  | NIL | 336.28 | ON  | 371.39 | NIL | 311.55 |
| 3536 | ψSymA | 7_SMA0250     | CDS | 139020 | 140297 | + | 30 | 30 | ON  | 633.3  | ON  | 520.8  | ON  | 381.35 | ON  | 508.64 | ON  | 396.17 |
| 3537 | ψSymA | 7_SMA0252     | CDS | 141353 | 141353 | + | 30 | 30 | ON  | 635.37 | ON  | 430.92 | NIL | 402.95 | ON  | 542.09 | NIL | 355.91 |
| 3538 | ψSymA | 7_SMA0254     | CDS | 141517 | 142197 | + | 30 | 30 | ON  | 340.73 | ON  | 328.27 | NIL | 345.19 | NIL | 327.83 | NIL | 341.03 |
| 3539 | ψSymA | 7_SMA0255     | CDS | 142327 | 143304 | + | 30 | 30 | ON  | 329.86 | NIL | 309.09 | NIL | 354.68 | NIL | 330.14 | NIL | 327.71 |
| 3540 | ψSymA | 7_SMA0257     | CDS | 143473 | 145566 | - | 30 | 30 | ON  | 390.44 | ON  | 382.18 | NIL | 372.08 | ON  | 338.24 | NIL | 317.18 |
| 3541 | ψSymA | 7_SMA0259     | CDS | 145822 | 146667 | - | 30 | 30 | ON  | 335.83 | ON  | 325.87 | ON  | 334.76 | ON  | 340.94 | NIL | 312.01 |
| 3542 | ψSymA | gabd3_SMA0260 | CDS | 146683 | 148146 | - | 30 | 30 | ON  | 327.22 | ON  | 327.38 | NIL | 332.51 | NIL | 323.85 | NIL | 332.06 |
| 3543 | ψSymA | 7_SMA0263     | CDS | 148163 | 149362 | - | 30 | 30 | ON  | 321.45 | ON  | 473.13 | NIL | 373.1  | ON  | 386.87 | ON  | 381.23 |
| 3544 | ψSymA | 7_SMA0265     | CDS | 149384 | 150388 | - | 30 | 30 | ON  | 315.45 | ON  | 375    | NIL | 353.83 | ON  | 359.17 | NIL | 359.23 |
| 3545 | ψSymA | 7_SMA0267     | CDS | 150483 | 151175 | + | 30 | 30 | NIL | 280.16 | NIL | 279.87 | NIL | 262.76 | NIL | 259.79 | NIL | 314.64 |
| 3546 | ψSymA | 7_SMA0270     | CDS | 151172 | 152764 | + | 31 | 31 | NIL | 306.45 | NIL | 326.39 | NIL | 309.43 | NIL | 310.44 | NIL | 282.73 |
| 3547 | ψSymA | 7_SMA0271     | CDS | 152730 | 153725 | + | 30 | 30 | NIL | 282.92 | NIL | 312.52 | NIL | 301.88 | NIL | 326.51 | NIL | 324.69 |
| 3548 | ψSymA | 7_SMA0273     | CDS | 153755 | 154720 | + | 30 | 30 | ON  | 325.18 | ON  | 345.1  | NIL | 347.87 | ON  | 441.62 | NIL | 363.87 |
| 3549 | ψSymA | 7_SMA0275     | CDS | 154841 | 155428 | + | 30 | 30 | NIL | 285.28 | NIL | 298.87 | ON  | 403.11 | ON  | 338.59 | NIL | 326.17 |
| 3550 | ψSymA | 7_SMA0277     | CDS | 155958 | 155948 | - | 30 | 30 | NIL | 280.41 | NIL | 299.36 | NIL | 256.83 | NIL | 293.33 | NIL | 300.09 |
| 3551 | ψSymA | 7_SMA0278     | CDS | 156030 | 156930 | - | 30 | 30 | NIL | 244.12 | NIL | 257.72 | NIL | 276.89 | NIL | 227.63 | NIL | 270.12 |
| 3552 | ψSymA | 7_SMA0279     | CDS | 156800 | 157411 | - | 30 | 30 | NIL | 361.78 | ON  | 354.27 | NIL | 373.21 | NIL | 402.51 | NIL | 325.04 |
| 3553 | ψSymA | 7_SMA0280     | CDS | 157557 | 158345 | - | 30 | 30 | NIL | 282.12 | NIL | 301.85 | NIL | 299.02 | NIL | 290.19 | NIL | 340.59 |
| 3554 | ψSymA | 7_SMA0281     | CDS | 158400 | 158804 | + | 30 | 30 | NIL | 281.14 | NIL | 274.75 | NIL | 332.4  | NIL | 327.74 | NIL | 343.29 |
| 3555 | ψSymA | 7_SMA0285     | CDS | 159165 | 159362 | - | 30 | 30 | NIL | 290.59 | NIL | 263.44 | ON  | 384.03 | NIL | 324.33 | NIL | 342.31 |
| 3556 | ψSymA | 7_SMA0286     | CDS | 159590 | 160505 | - | 30 | 30 | ON  | 397.73 | ON  | 357.39 | NIL | 361.56 | ON  | 389.56 | NIL | 364.78 |
| 3557 | ψSymA | 7_SMA0287     | CDS | 160062 | 160508 | - | 31 | 31 | ON  | 333.43 | ON  | 375.64 | ON  | 397.89 | ON  | 322.75 | NIL | 280.12 |
| 3558 | ψSymA | 7_SMA0288     | CDS | 160505 | 161341 | - | 30 | 30 | NIL | 290.93 | NIL | 300.3  | NIL | 323.23 | NIL | 315.23 | NIL | 300.46 |
| 3559 | ψSymA | 7_SMA0291     | CDS | 161616 | 161984 | + | 30 | 30 | NIL | 292.57 | NIL | 282.15 | NIL | 306.91 | NIL | 309.87 | ON  | 330.23 |
| 3560 | ψSymA | 7_SMA0292     | CDS | 162029 | 162196 | - | 30 | 30 | ON  | 339.85 | ON  | 345.63 | NIL | 309.87 | ON  | 338.91 | NIL | 330.23 |
| 3561 | ψSymA | 7_SMA0293     | CDS | 162273 | 162384 | - | 30 | 30 | NIL | 250.31 | NIL | 277.02 | NIL | 297.41 | NIL | 256.23 | NIL | 282.73 |
| 3562 | ψSymA | 7_SMA0298     | CDS | 162854 | 164855 | - | 30 | 30 | ON  | 315.05 | NIL | 315.62 | ON  | 321.23 | NIL | 323.1  | NIL | 340.91 |
| 3563 | ψSymA | 7_SMA0299     | CDS | 164858 | 165745 | - | 30 | 30 | ON  | 330.83 | ON  | 330.92 | NIL | 301.52 | NIL | 315.27 | NIL | 301.51 |
| 3564 | ψSymA | 7_SMA0300     | CDS | 165742 | 166695 | - | 31 | 31 | ON  | 363.6  | ON  | 365.09 | NIL | 352.89 | ON  | 352.7  | NIL | 325.53 |
| 3565 | ψSymA | 7_SMA0302     | CDS | 166692 | 167360 | - | 30 | 30 | NIL | 321.56 | ON  | 353    | NIL | 325.5  | NIL | 299.71 | NIL | 325.18 |
| 3566 | ψSymA | 7_SMA0307     | CDS | 169430 | 169942 | + | 30 | 30 | NIL | 288.57 | NIL | 308.61 | ON  | 354.25 | NIL | 317.59 | NIL | 325.18 |
| 3567 | ψSymA | 7_SMA0303     | CDS | 170035 | 171675 | - | 30 | 30 | NIL | 361.78 | ON  | 382.44 | ON  | 396.33 | ON  | 366.19 | NIL | 374.04 |
| 3568 | ψSymA | 7_SMA0306     | CDS | 170035 | 171675 | - | 30 | 30 | NIL | 270.39 | NIL | 293.19 | NIL | 285.8  | NIL | 294.89 | NIL | 296.75 |
| 3569 | ψSymA | 7_SMA0307     | CDS | 172016 | 173002 | - | 30 | 30 | NIL | 269.93 | NIL | 280.88 | NIL | 285.39 | NIL | 297.78 | NIL | 263.82 |
| 3570 | ψSymA | 7_SMA0308     | CDS | 173063 | 174022 | + | 30 | 30 | NIL | 253.78 | NIL | 274.56 | NIL | 305.5  | NIL | 290.32 | NIL | 295.38 |
| 3571 | ψSymA | 7_SMA0310     | CDS | 174273 | 175004 | + | 30 | 30 | NIL | 292.75 | NIL | 323.38 | NIL | 377.31 | NIL | 361.14 | NIL | 324.91 |
| 3572 | ψSymA | 7_SMA0312     | CDS | 175343 | 175876 | + | 30 | 30 | NIL | 335.72 | ON  | 379.62 | ON  | 385.03 | ON  | 424.04 | ON  | 403.66 |
| 3573 | ψSymA | 7_SMA0314     | CDS | 175873 | 176124 | + | 30 | 30 | NIL | 289.79 | NIL | 295.65 | NIL | 342.53 | NIL | 296.7  | NIL | 347.01 |
| 3574 | ψSymA | 7_SMA0316     | CDS | 176207 | 177469 | + | 30 | 30 | NIL | 253.81 | ON  | 295.65 | NIL | 320.9  | NIL | 288.77 | NIL | 297.03 |
| 3575 | ψSymA | 7_SMA0319     | CDS | 177973 | 178974 | + | 30 | 30 | NIL | 311.5  | ON  | 280.53 | NIL | 327.61 | NIL | 317.62 | NIL | 330.14 |
| 3576 | ψSymA | 7_SMA0320     | CDS | 179926 | 179868 | + | 30 | 30 | NIL | 281.63 | NIL | 295    | NIL | 328.29 | NIL | 328.54 | NIL | 304.23 |
| 3577 | ψSymA | 7_SMA0322     | CDS | 179926 | 180474 | + | 30 | 30 | NIL | 271.21 | NIL | 276.57 | NIL | 344.3  | NIL | 318.47 | NIL | 334.28 |
| 3578 | ψSymA | 7_SMA0323     | CDS | 180809 | 180809 | + | 30 | 30 | NIL | 212.85 | NIL | 227.49 | NIL | 276.67 | NIL | 280.43 | NIL | 266.28 |
| 3579 | ψSymA | 7_SMA0325     | CDS | 180910 | 181212 | + | 30 | 30 | NIL | 328.85 | ON  | 365.68 | ON  | 333.3  | ON  | 330.52 | NIL | 349.52 |
| 3580 | ψSymA | 7_SMA0326     | CDS | 181233 | 182072 | + | 30 | 30 | ON  | 319.68 | NIL | 300.06 | ON  | 379.82 | NIL | 366.16 | NIL | 332.58 |
| 3581 | ψSymA | 7_SMA0329     | CDS | 182145 | 182906 | + | 30 | 30 | ON  | 294.38 | NIL | 319.28 | NIL | 353.69 | NIL | 329.86 | NIL | 352.56 |
| 3582 | ψSymA | 7_SMA0333     | CDS | 183183 | 183395 | - | 30 | 30 | NIL | 282.35 | NIL | 287.4  | NIL | 226.08 | NIL | 282.73 | NIL | 296.64 |
| 3583 | ψSymA | 7_SMA0335     | CDS | 183576 | 184355 | - | 31 | 31 | NIL | 312.85 | NIL | 318.3  | ON  | 398.66 | ON  | 365.99 | NIL | 365.48 |
| 3584 | ψSymA | 7_SMA0337     | CDS | 184339 | 184821 | - | 30 | 30 | NIL | 277.05 | NIL | 283.09 | NIL | 277.02 | NIL | 265.03 | NIL | 261.59 |
| 3585 | ψSymA | 7_SMA0339     | CDS | 184847 | 185620 | - | 30 | 30 | NIL | 288.28 | NIL | 291.5  | NIL | 324.1  | NIL | 288.96 | NIL | 353.66 |
| 3586 | ψSymA | wntA2_SMA0340 | CDS | 185692 | 186300 | - | 30 | 30 | NIL | 276.31 | NIL | 277.6  | NIL | 311.15 | NIL | 314.31 | NIL | 337.05 |
| 3587 | ψSymA | 7_SMA0341     | CDS | 186524 | 186718 | + | 30 | 30 | NIL | 243.21 | NIL | 245.81 | NIL | 290.31 | NIL | 237.45 | NIL | 253.09 |
| 3588 | ψSymA | 7_SMA0343     | CDS | 186903 | 187937 | - | 30 | 30 | ON  | 444.07 | ON  | 451.53 | NIL | 330.6  | ON  | 346.38 | NIL | 348.98 |
| 3589 | ψSymA | 7_SMA0346     | CDS | 187341 | 187958 | - | 30 | 30 | ON  | 351.21 | ON  | 340.04 | NIL | 352.9  | ON  | 390.32 | NIL | 362.94 |
| 3590 | ψSymA | 7_SMA0347     | CDS | 188006 | 188893 | + | 30 | 30 | ON  | 323.23 | NIL | 306.22 | NIL | 272.06 | NIL | 291.43 | NIL | 284.75 |

|            |              |     |          |          |    |    |     |        |     |        |     |        |     |        |     |        |
|------------|--------------|-----|----------|----------|----|----|-----|--------|-----|--------|-----|--------|-----|--------|-----|--------|
| 3591 pSYMA | ?_SMA0349    | CDS | 189202   | 189798 - | 30 | 30 | NIL | 301.57 | ON  | 333.11 | NIL | 347.67 | NIL | 315.03 | NIL | 324.27 |
| 3592 pSYMA | ?_SMA0352    | CDS | 189834   | 190730 - | 30 | 30 | NIL | 347.51 | ON  | 360.98 | NIL | 366.79 | ON  | 351.74 | NIL | 335.59 |
| 3593 pSYMA | ?_SMA0353    | CDS | 190833   | 191747 + | 30 | 30 | NIL | 292.86 | NIL | 307.3  | NIL | 322.55 | NIL | 307.96 | NIL | 313.81 |
| 3594 pSYMA | ?_SMA0355    | CDS | 191811   | 192416 + | 31 | 31 | ON  | 355.42 | NIL | 350.17 | NIL | 351.26 | ON  | 341.22 | NIL | 379.43 |
| 3596 pSYMA | ?_SMA0356    | CDS | 192397   | 192843 + | 30 | 30 | NIL | 253.51 | NIL | 269.61 | NIL | 253.7  | NIL | 238.71 | NIL | 294.92 |
| 3597 pSYMA | ?_SMA0357    | CDS | 193272   | 193553 - | 30 | 30 | NIL | 279.44 | NIL | 277.55 | NIL | 253.7  | NIL | 242.57 | NIL | 324.69 |
| 3598 pSYMA | ?_SMA0359    | CDS | 193562   | 193807 - | 31 | 31 | ON  | 373.36 | NIL | 342.22 | NIL | 340.54 | ON  | 430.57 | ON  | 383.78 |
| 3599 pSYMA | ?_SMA0360    | CDS | 193804   | 194391 - | 30 | 30 | ON  | 434.18 | ON  | 401.17 | ON  | 551.12 | ON  | 472.3  | NIL | 470.81 |
| 3600 pSYMA | ?_SMA0364    | CDS | 195082   | 196660 + | 30 | 30 | ON  | 344.06 | ON  | 332.13 | ON  | 412.99 | ON  | 398.39 | NIL | 365.62 |
| 3601 pSYMA | ?_SMA0367    | CDS | 196912   | 197808 + | 30 | 30 | ON  | 410.98 | NIL | 468.29 | NIL | 365.66 | ON  | 378.68 | NIL | 362.14 |
| 3602 pSYMA | ?_SMA0370    | CDS | 197906   | 198172 + | 30 | 30 | NIL | 241.24 | NIL | 249.27 | NIL | 298.23 | NIL | 292.07 | NIL | 292.07 |
| 3603 pSYMA | ?_SMA0372    | CDS | 198324   | 198536   | 30 | 30 | ON  | 350.27 | NIL | 330.66 | NIL | 339.74 | NIL | 327.74 | NIL | 354.32 |
| 3604 pSYMA | ?_SMA0374    | CDS | 199105   | 200004 - | 30 | 30 | ON  | 466.27 | ON  | 364.43 | ON  | 397.27 | ON  | 381.11 | NIL | 343.75 |
| 3605 pSYMA | ?_SMA0376    | CDS | 200116   | 201048 + | 30 | 30 | NIL | 300.96 | NIL | 305.24 | NIL | 364.36 | ON  | 341.61 | NIL | 356.92 |
| 3606 pSYMA | ?_SMA0380    | CDS | 201366   | 202055 + | 30 | 30 | NIL | 308.77 | NIL | 307.83 | NIL | 331.75 | NIL | 318.82 | NIL | 331.89 |
| 3607 pSYMA | ?_SMA0383    | CDS | 202407   | 204389 + | 30 | 30 | ON  | 406.6  | NIL | 368.81 | NIL | 376.07 | ON  | 375.76 | NIL | 362.51 |
| 3608 pSYMA | ?_SMA0384    | CDS | 204990   | 206588 + | 30 | 30 | NIL | 292.06 | NIL | 287.36 | NIL | 294.15 | NIL | 294.81 | ON  | 314.67 |
| 3609 pSYMA | h5c3;SMA0387 | CDS | 207586   | 208788 - | 67 | 0  | ON  | 443.84 | NIL | 452.19 | ON  | 376.64 | ON  | 427.51 | NIL | 344.74 |
| 3610 pSYMA | ?_SMA0389    | CDS | 209020   | 210132 - | 30 | 30 | ON  | 377.23 | ON  | 351.24 | NIL | 336.89 | ON  | 356.44 | NIL | 324.63 |
| 3611 pSYMA | ?_SMA0391    | CDS | 210350   | 211030 + | 30 | 30 | ON  | 371.03 | NIL | 376.02 | ON  | 403.57 | ON  | 431.85 | NIL | 389.13 |
| 3612 pSYMA | ?_SMA0392    | CDS | 211336   | 212469 + | 30 | 30 | ON  | 315.95 | NIL | 293.52 | NIL | 351.08 | ON  | 349.39 | NIL | 339.47 |
| 3613 pSYMA | ?_SMA0394    | CDS | 212503   | 213618 + | 30 | 30 | ON  | 414.66 | ON  | 354.06 | NIL | 331.87 | ON  | 376.93 | NIL | 318.56 |
| 3614 pSYMA | ?_SMA0396    | CDS | 213683   | 214627 + | 30 | 30 | ON  | 326.9  | ON  | 332.84 | NIL | 354.29 | NIL | 331.86 | NIL | 318.2  |
| 3615 pSYMA | h5d2;SMA0398 | CDS | 214624   | 215424 + | 30 | 30 | ON  | 335.52 | ON  | 332.84 | NIL | 265.02 | NIL | 268.91 | NIL | 270.92 |
| 3616 pSYMA | ?_SMA0400    | CDS | 215421   | 216791 + | 30 | 30 | ON  | 384.2  | ON  | 306.18 | NIL | 349.19 | NIL | 313.07 | NIL | 268.51 |
| 3617 pSYMA | ?_SMA0402    | CDS | 216795   | 217808 + | 30 | 30 | ON  | 311.42 | NIL | 353.55 | NIL | 389.37 | ON  | 348.73 | NIL | 363.49 |
| 3618 pSYMA | ?_SMA0403    | CDS | 217871   | 218602 + | 31 | 31 | NIL | 283.52 | NIL | 315.26 | NIL | 358.5  | NIL | 332.84 | NIL | 340.39 |
| 3619 pSYMA | ?_SMA0404    | CDS | 218550   | 219838 + | 31 | 31 | NIL | 283.52 | NIL | 284.57 | NIL | 320.03 | NIL | 297.73 | NIL | 312.31 |
| 3620 pSYMA | ?_SMA0405    | CDS | 219940   | 221058 + | 30 | 30 | NIL | 360.87 | ON  | 363.7  | ON  | 404.15 | ON  | 403.56 | NIL | 378.15 |
| 3621 pSYMA | ?_SMA0407    | CDS | 221420   | 221725 + | 30 | 30 | NIL | 255.54 | NIL | 262.27 | NIL | 319.3  | NIL | 300.34 | NIL | 301.58 |
| 3622 pSYMA | ?_SMA0409    | CDS | 222078   | 222866 + | 31 | 31 | NIL | 341.21 | ON  | 363.62 | NIL | 329.27 | ON  | 381.08 | NIL | 368.93 |
| 3623 pSYMA | ?_SMA0412    | CDS | 222836   | 223171 - | 30 | 30 | NIL | 251.44 | NIL | 270.98 | NIL | 266.14 | NIL | 258.01 | NIL | 253.05 |
| 3624 pSYMA | ?_SMA0414    | CDS | 223861   | 224271 - | 30 | 30 | ON  | 303.47 | NIL | 307.97 | NIL | 334.3  | NIL | 307.43 | NIL | 333.89 |
| 3625 pSYMA | ?_SMA0417    | CDS | 224805   | 224875 + | 30 | 30 | ON  | 309.59 | NIL | 306.99 | NIL | 329.46 | ON  | 357.58 | NIL | 334.09 |
| 3626 pSYMA | ?_SMA0421    | CDS | 226536   | 227393 + | 30 | 30 | NIL | 331.1  | NIL | 304.04 | NIL | 380.24 | ON  | 336.4  | NIL | 335.77 |
| 3627 pSYMA | ?_SMA0424    | CDS | 228306   | 228824 + | 30 | 30 | NIL | 308.94 | ON  | 304.98 | ON  | 409.71 | ON  | 361.83 | ON  | 395.3  |
| 3628 pSYMA | ?_SMA0426    | CDS | 229290   | 230330 - | 31 | 31 | NIL | 374.49 | NIL | 328.84 | ON  | 424    | NIL | 394.65 | NIL | 387.4  |
| 3629 pSYMA | ?_SMA0429    | CDS | 231133 - | 231133 - | 30 | 30 | NIL | 295.26 | NIL | 314.71 | NIL | 356.24 | NIL | 302.24 | NIL | 292.92 |
| 3630 pSYMA | ?_SMA0431    | CDS | 231427   | 232443 + | 30 | 30 | NIL | 306.41 | NIL | 298.03 | NIL | 309.91 | NIL | 310.51 | NIL | 324.64 |
| 3631 pSYMA | ?_SMA0433    | CDS | 232436   | 233029 - | 30 | 30 | NIL | 303.42 | NIL | 324.37 | NIL | 373.12 | NIL | 354.95 | NIL | 337.77 |
| 3632 pSYMA | ?_SMA0436    | CDS | 233560   | 234030 + | 30 | 30 | NIL | 274.28 | NIL | 271.14 | NIL | 308.05 | NIL | 299.49 | NIL | 322.68 |
| 3633 pSYMA | ?_SMA0439    | CDS | 234631   | 234631 - | 30 | 30 | NIL | 257.64 | NIL | 281.53 | NIL | 260.62 | NIL | 284.78 | NIL | 283.91 |
| 3634 pSYMA | ?_SMA0443    | CDS | 235905 - | 235905 - | 30 | 30 | ON  | 330.05 | ON  | 374.13 | NIL | 358.81 | ON  | 337.45 | NIL | 346.43 |
| 3635 pSYMA | ?_SMA0444    | CDS | 236315   | 236716 - | 30 | 30 | ON  | 323.78 | NIL | 317.51 | NIL | 412.11 | ON  | 362.47 | NIL | 325.03 |
| 3636 pSYMA | ?_SMA0445    | CDS | 237055   | 237597 - | 40 | 7  | ON  | 382.93 | ON  | 349.2  | NIL | 320.29 | ON  | 335.31 | ON  | 300.19 |
| 3637 pSYMA | ?_SMA0447    | CDS | 238678   | 238097 - | 49 | 0  | ON  | 761.3  | ON  | 867.1  | ON  | 420.56 | ON  | 653.45 | NIL | 445.16 |
| 3638 pSYMA | ?_SMA0448    | CDS | 238528   | 239649 + | 30 | 30 | NIL | 347.63 | ON  | 341.5  | NIL | 387.47 | ON  | 400.41 | NIL | 360.96 |
| 3639 pSYMA | ?_SMA0450    | CDS | 240025   | 240435 - | 30 | 30 | NIL | 303.09 | NIL | 315.53 | ON  | 426.9  | ON  | 376.39 | NIL | 446.59 |
| 3640 pSYMA | ?_SMA0451    | CDS | 240985   | 241272 + | 30 | 30 | NIL | 226.7  | NIL | 296.86 | NIL | 326.84 | NIL | 280.41 | NIL | 292.99 |
| 3641 pSYMA | ?_SMA0453    | CDS | 241992   | 242243 + | 30 | 30 | NIL | 214.21 | NIL | 219.76 | NIL | 260.17 | NIL | 241.11 | NIL | 263.82 |
| 3642 pSYMA | ?_SMA0457    | CDS | 243155   | 243562 + | 30 | 30 | NIL | 325.17 | ON  | 325.01 | NIL | 326.87 | NIL | 332.42 | NIL | 329.81 |
| 3643 pSYMA | ?_SMA0461    | CDS | 243944   | 244327 - | 30 | 30 | NIL | 247.34 | NIL | 244.05 | NIL | 262.27 | NIL | 255.31 | NIL | 286.91 |
| 3644 pSYMA | ?_SMA0462    | CDS | 245116   | 246318 + | 66 | 0  | ON  | 442.94 | ON  | 435.92 | NIL | 378.43 | ON  | 430.89 | ON  | 348.21 |
| 3645 pSYMA | ?_SMA0464    | CDS | 246227   | 248227 - | 30 | 30 | NIL | 298.36 | ON  | 365.99 | NIL | 341.74 | ON  | 344.28 | NIL | 314.25 |
| 3646 pSYMA | ?_SMA0466    | CDS | 248442   | 251618 - | 30 | 30 | ON  | 321    | ON  | 347.2  | NIL | 334.76 | ON  | 362.34 | NIL | 303.24 |
| 3647 pSYMA | ?_SMA0467    | CDS | 252021   | 253625 + | 30 | 30 | NIL | 274.11 | NIL | 292.04 | NIL | 326.84 | NIL | 317.13 | NIL | 306.27 |
| 3648 pSYMA | ?_SMA0469    | CDS | 253663   | 254879 + | 30 | 30 | ON  | 327.65 | NIL | 296.59 | NIL | 303.9  | NIL | 346.05 | NIL | 307.34 |
| 3649 pSYMA | ?_SMA0470    | CDS | 254969   | 255718 + | 30 | 30 | NIL | 312.4  | NIL | 315.38 | NIL | 312.46 | NIL | 337.35 | NIL | 347.65 |
| 3650 pSYMA | ?_SMA0471    | CDS | 255793   | 257562 + | 30 | 30 | NIL | 292.79 | NIL | 306.27 | NIL | 312.46 | NIL | 309.36 | NIL | 314.77 |
| 3651 pSYMA | ?_SMA0473    | CDS | 258825   | 258823 + | 31 | 30 | NIL | 387.9  | ON  | 335.71 | NIL | 335.46 | NIL | 335.46 | NIL | 344.36 |
| 3652 pSYMA | ?_SMA0475    | CDS | 259830   | 259823 + | 33 | 27 | NIL | 294.24 | ON  | 346.18 | NIL | 306.68 | NIL | 316.45 | NIL | 342.27 |
| 3653 pSYMA | ?_SMA0476    | CDS | 259912   | 259911 + | 71 | 1  | ON  | 360.94 | ON  | 423.11 | ON  | 479.72 | ON  | 330.34 | NIL | 310.82 |
| 3654 pSYMA | ?_SMA0478    | CDS | 259996   | 260349 + | 30 | 0  | ON  | 466.38 | ON  | 433.11 | ON  | 479.72 | ON  | 449.45 | NIL | 434.1  |
| 3655 pSYMA | ?_SMA0480    | CDS | 260764   | 261969 - | 30 | 15 | NIL | 319.73 | NIL | 327.39 | NIL | 347.72 | ON  | 354.71 | NIL | 302.55 |
| 3656 pSYMA | ?_SMA0481    | CDS | 262608   | 262937 + | 34 | 30 | NIL | 237.6  | NIL | 251.69 | NIL | 308.2  | NIL | 293.14 | NIL | 302.89 |
| 3657 pSYMA | ?_SMA0483    | CDS | 262934   | 263128 + | 30 | 6  | NIL | 312.14 | NIL | 285.19 | NIL | 278.5  | NIL | 278.24 | NIL | 295.17 |
| 3658 pSYMA | h5c2;SMA0485 | CDS | 263506   | 264432 - | 30 | 30 | NIL | 264.93 | NIL | 265.19 | NIL | 283.88 | NIL | 284.73 | NIL | 304.64 |
| 3659 pSYMA | ?_SMA0486    | CDS | 264485   | 265939 - | 30 | 30 | ON  | 320.16 | NIL | 293.8  | NIL | 333.33 | NIL | 294.96 | NIL | 296.97 |
| 3660 pSYMA | ?_SMA0489    | CDS | 266004   | 266954 - | 30 | 30 | ON  | 362.24 | ON  | 338.81 | NIL | 366.42 | NIL | 331.28 | NIL | 365.74 |
| 3661 pSYMA | ?_SMA0492    | CDS | 267102   | 267869 - | 30 | 30 | NIL | 326.55 | NIL | 301.17 | NIL | 343.36 | NIL | 328.41 | NIL | 305.43 |
| 3662 pSYMA | ?_SMA0493    | CDS | 267881   | 268564 - | 31 | 31 | NIL | 283.44 | NIL | 265.77 | NIL | 271.18 | NIL | 254.73 | NIL | 299.2  |
|            |              |     | 268561   | 269259 - | 30 | 30 | ON  | 328.55 | ON  | 351.73 | NIL | 281.89 | NIL | 305.14 | NIL | 348.3  |

|            |                  |     |        |        |   |    |    |     |        |     |        |     |        |     |        |     |        |
|------------|------------------|-----|--------|--------|---|----|----|-----|--------|-----|--------|-----|--------|-----|--------|-----|--------|
| 3663 pSYMA | ?_SMA0495        | CDS | 269299 | 270117 | - | 30 | 30 | NIL | 275.39 | NIL | 268.3  | NIL | 286.14 | NIL | 304.86 | NIL | 322.71 |
| 3664 pSYMA | ?_SMA0496        | CDS | 270979 | 270979 | + | 30 | 30 | NIL | 376.81 | ON  | 353.27 | NIL | 356.64 | ON  | 376.81 | NIL | 327.29 |
| 3665 pSYMA | ?_SMA0498        | CDS | 271057 | 271956 | - | 30 | 30 | NIL | 245.41 | NIL | 240.88 | NIL | 318.53 | NIL | 254.34 | NIL | 280.07 |
| 3666 pSYMA | ?_SMA0501        | CDS | 272059 | 272691 | + | 30 | 30 | ON  | 324.17 | NIL | 297.03 | NIL | 362.68 | NIL | 327.43 | NIL | 363.38 |
| 3667 pSYMA | ?_SMA0501        | CDS | 272734 | 273420 | + | 30 | 30 | ON  | 275.1  | NIL | 300.86 | NIL | 266.7  | NIL | 277.94 | NIL | 270.62 |
| 3668 pSYMA | ?_SMA0503        | CDS | 273422 | 274078 | + | 30 | 30 | NIL | 283.6  | ON  | 270.91 | NIL | 292.67 | NIL | 292.67 | NIL | 266.48 |
| 3669 pSYMA | ?_SMA0506        | CDS | 274136 | 274933 | + | 30 | 30 | NIL | 314.38 | ON  | 329.42 | NIL | 271.16 | NIL | 376.78 | NIL | 318.05 |
| 3670 pSYMA | ?_SMA0508        | CDS | 274983 | 275714 | + | 30 | 30 | NIL | 410.49 | ON  | 371.22 | NIL | 291.23 | ON  | 365.32 | ON  | 410.58 |
| 3671 pSYMA | ?_SMA0510        | CDS | 275787 | 276734 | + | 30 | 30 | NIL | 298.5  | NIL | 298.9  | NIL | 367.3  | NIL | 313.35 | NIL | 312.78 |
| 3672 pSYMA | lkn01.2:_SMA0512 | CDS | 277846 | 277776 | + | 30 | 30 | NIL | 281.9  | ON  | 304.09 | NIL | 266.49 | NIL | 312.27 | NIL | 320.7  |
| 3673 pSYMA | lkn01.2:_SMA0513 | CDS | 277846 | 277846 | + | 30 | 30 | NIL | 315.86 | ON  | 322.08 | NIL | 347.17 | NIL | 293.8  | NIL | 322.99 |
| 3674 pSYMA | lknK:_SMA0514    | CDS | 279121 | 279121 | + | 30 | 30 | NIL | 315.14 | ON  | 328.14 | NIL | 356.95 | ON  | 342.63 | NIL | 320.29 |
| 3675 pSYMA | ?_SMA0516        | CDS | 279118 | 280005 | + | 31 | 31 | NIL | 299.47 | NIL | 299.44 | NIL | 360.87 | NIL | 319.87 | NIL | 332.7  |
| 3676 pSYMA | ?_SMA0518        | CDS | 280002 | 280334 | + | 30 | 30 | ON  | 317.24 | ON  | 283.31 | ON  | 394.07 | NIL | 339.08 | NIL | 319.16 |
| 3677 pSYMA | ?_SMA0520        | CDS | 280693 | 281535 | + | 30 | 30 | ON  | 326.82 | ON  | 328.85 | NIL | 352.93 | NIL | 317.04 | NIL | 352.93 |
| 3678 pSYMA | ?_SMA0522        | CDS | 281644 | 282392 | + | 32 | 32 | NIL | 269.26 | NIL | 257.39 | NIL | 307.21 | NIL | 322.62 | NIL | 329.57 |
| 3679 pSYMA | ?_SMA0523        | CDS | 282373 | 282777 | + | 30 | 30 | NIL | 355.17 | ON  | 368.3  | ON  | 410.24 | ON  | 322.62 | NIL | 329.57 |
| 3680 pSYMA | ?_SMA0525        | CDS | 282774 | 284579 | + | 30 | 30 | ON  | 310.47 | NIL | 324.38 | NIL | 325.67 | NIL | 361.47 | NIL | 327.86 |
| 3681 pSYMA | ?_SMA0526        | CDS | 284576 | 285622 | + | 30 | 30 | ON  | 325.48 | ON  | 340.53 | ON  | 452.69 | ON  | 379.14 | ON  | 327.86 |
| 3682 pSYMA | ?_SMA0527        | CDS | 285619 | 286218 | + | 30 | 30 | ON  | 338.23 | ON  | 404.07 | NIL | 385.35 | NIL | 379.14 | ON  | 411.92 |
| 3683 pSYMA | ?_SMA0535        | CDS | 287402 | 287575 | - | 30 | 15 | NIL | 355.24 | ON  | 358.69 | NIL | 306.76 | ON  | 331.25 | NIL | 317.22 |
| 3684 pSYMA | ?_SMA0537        | CDS | 287923 | 288336 | + | 30 | 30 | NIL | 250.26 | NIL | 273.34 | ON  | 285.97 | NIL | 291.61 | NIL | 297.66 |
| 3685 pSYMA | ?_SMA0538        | CDS | 288341 | 288703 | + | 30 | 30 | ON  | 360.87 | ON  | 380.39 | ON  | 438.14 | ON  | 424.1  | NIL | 383.41 |
| 3686 pSYMA | ?_SMA0541        | CDS | 289770 | 290228 | + | 30 | 30 | NIL | 253.02 | NIL | 276.67 | NIL | 308.1  | NIL | 272.31 | NIL | 296.54 |
| 3687 pSYMA | ?_SMA0543        | CDS | 290367 | 290957 | + | 34 | 28 | NIL | 298.15 | NIL | 290.12 | NIL | 297.96 | NIL | 309.61 | NIL | 310.86 |
| 3688 pSYMA | ?_SMA0545        | CDS | 291198 | 291638 | - | 30 | 30 | ON  | 396.22 | ON  | 451.56 | ON  | 347.16 | ON  | 360.51 | NIL | 325.66 |
| 3689 pSYMA | ?_SMA0548        | CDS | 291638 | 291877 | - | 30 | 30 | NIL | 444.3  | ON  | 307.99 | NIL | 435.42 | ON  | 512.99 | ON  | 444.38 |
| 3690 pSYMA | ?_SMA0551        | CDS | 292205 | 293509 | + | 30 | 30 | NIL | 271.21 | NIL | 322.95 | NIL | 349.49 | ON  | 306.05 | NIL | 338.18 |
| 3691 pSYMA | ?_SMA0552        | CDS | 293506 | 294093 | + | 31 | 29 | NIL | 305.09 | NIL | 322.95 | NIL | 331.76 | ON  | 348.21 | NIL | 328.9  |
| 3692 pSYMA | ?_SMA0554        | CDS | 294071 | 294868 | + | 31 | 30 | ON  | 345.1  | ON  | 357.03 | NIL | 337.61 | ON  | 366.72 | NIL | 371.36 |
| 3693 pSYMA | ?_SMA0557        | CDS | 295587 | 296474 | - | 30 | 30 | ON  | 344.47 | ON  | 356.29 | NIL | 360.71 | ON  | 365.61 | NIL | 330.23 |
| 3694 pSYMA | ?_SMA0558        | CDS | 296478 | 296990 | + | 30 | 30 | NIL | 239.27 | NIL | 261.8  | NIL | 260.98 | NIL | 333.7  | NIL | 272.2  |
| 3695 pSYMA | ?_SMA0559        | CDS | 297012 | 297791 | + | 30 | 30 | NIL | 280.93 | NIL | 305.56 | NIL | 329.47 | NIL | 318.31 | NIL | 318.31 |
| 3696 pSYMA | ?_SMA0561        | CDS | 297935 | 298318 | + | 30 | 30 | NIL | 331.11 | NIL | 301.95 | ON  | 415.3  | NIL | 318.46 | NIL | 353.79 |
| 3697 pSYMA | ?_SMA0563        | CDS | 299329 | 299318 | + | 30 | 30 | NIL | 310.27 | NIL | 306.63 | ON  | 403.12 | NIL | 345.49 | NIL | 361.57 |
| 3698 pSYMA | ?_SMA0564        | CDS | 299417 | 300487 | + | 31 | 31 | NIL | 304.07 | NIL | 300.83 | NIL | 379.07 | NIL | 323.93 | NIL | 339.76 |
| 3699 pSYMA | ?_SMA0565        | CDS | 300465 | 300914 | - | 30 | 30 | NIL | 257.77 | NIL | 253.84 | NIL | 331.06 | NIL | 295.06 | NIL | 315.16 |
| 3700 pSYMA | ?_SMA0567        | CDS | 301264 | 301761 | + | 30 | 30 | NIL | 234.46 | NIL | 243.69 | NIL | 306.23 | NIL | 292.08 | NIL | 299.18 |
| 3701 pSYMA | lknF.L:_SMA0570  | CDS | 301877 | 303766 | - | 30 | 30 | ON  | 331.18 | NIL | 319.16 | ON  | 398.46 | NIL | 343.07 | NIL | 364.5  |
| 3702 pSYMA | ?_SMA0572        | CDS | 304557 | 304880 | + | 30 | 30 | NIL | 341.03 | NIL | 306.05 | NIL | 305.3  | ON  | 347    | NIL | 320.53 |
| 3703 pSYMA | ?_SMA0574        | CDS | 305128 | 305619 | - | 30 | 30 | NIL | 282.92 | NIL | 263.08 | NIL | 332.57 | NIL | 326.85 | NIL | 310.44 |
| 3704 pSYMA | ?_SMA0575        | CDS | 305865 | 306179 | + | 30 | 30 | ON  | 315.1  | NIL | 290.86 | ON  | 423.61 | ON  | 373.15 | NIL | 332    |
| 3705 pSYMA | ?_SMA0576        | CDS | 306248 | 307389 | + | 30 | 30 | NIL | 296.89 | ON  | 339.51 | NIL | 345.72 | ON  | 355.59 | NIL | 337.57 |
| 3706 pSYMA | ?_SMA0579        | CDS | 307560 | 307989 | + | 30 | 30 | NIL | 272.8  | NIL | 309.27 | NIL | 343.62 | ON  | 374.2  | ON  | 400.59 |
| 3707 pSYMA | ?_SMA0580        | CDS | 310134 | 310349 | - | 30 | 30 | NIL | 322.95 | NIL | 309.63 | ON  | 416.18 | NIL | 374.2  | ON  | 365.71 |
| 3708 pSYMA | ?_SMA0581        | CDS | 310425 | 311225 | - | 30 | 30 | ON  | 322.95 | NIL | 317.71 | ON  | 459.93 | NIL | 388.43 | NIL | 323.93 |
| 3709 pSYMA | ?_SMA0583        | CDS | 311239 | 312132 | - | 30 | 30 | NIL | 303.22 | ON  | 322.66 | NIL | 294.18 | NIL | 275.04 | NIL | 323.06 |
| 3710 pSYMA | ?_SMA0585        | CDS | 312195 | 313487 | + | 30 | 30 | ON  | 333    | ON  | 370.77 | ON  | 381.29 | ON  | 384.74 | NIL | 349.3  |
| 3711 pSYMA | ?_SMA0590        | CDS | 314305 | 314763 | + | 30 | 30 | NIL | 263.66 | NIL | 284.9  | NIL | 243.09 | NIL | 242.49 | NIL | 285.86 |
| 3712 pSYMA | ?_SMA0591        | CDS | 314792 | 314986 | + | 30 | 26 | ON  | 446.8  | ON  | 481.93 | ON  | 521.33 | ON  | 449.46 | ON  | 421.43 |
| 3713 pSYMA | ?_SMA0592        | CDS | 315280 | 316452 | + | 30 | 30 | ON  | 319.58 | ON  | 376.11 | NIL | 258.07 | NIL | 303.8  | NIL | 305.87 |
| 3714 pSYMA | ?_SMA0594        | CDS | 317459 | 317459 | + | 31 | 31 | ON  | 336.7  | ON  | 358.47 | ON  | 389.34 | NIL | 327.87 | NIL | 355.09 |
| 3715 pSYMA | ?_SMA0596        | CDS | 317729 | 317950 | + | 30 | 30 | NIL | 199.89 | NIL | 228.93 | NIL | 205.03 | NIL | 198.13 | NIL | 245.28 |
| 3716 pSYMA | ?_SMA0599        | CDS | 318078 | 319544 | - | 30 | 30 | ON  | 354.29 | ON  | 342.58 | NIL | 311.54 | NIL | 329    | NIL | 323.66 |
| 3717 pSYMA | ?_SMA0601        | CDS | 319553 | 321856 | - | 30 | 30 | ON  | 327.53 | NIL | 309.83 | ON  | 395.87 | ON  | 343.94 | NIL | 352.41 |
| 3718 pSYMA | ?_SMA0604        | CDS | 322406 | 323233 | + | 30 | 30 | NIL | 236.93 | NIL | 262.6  | NIL | 313.67 | NIL | 279.98 | NIL | 311.53 |
| 3719 pSYMA | ?_SMA0606        | CDS | 323230 | 323635 | + | 30 | 30 | NIL | 295.16 | NIL | 321.26 | NIL | 338.12 | ON  | 345.81 | NIL | 358.52 |
| 3720 pSYMA | ?_SMA0607        | CDS | 323618 | 325168 | + | 30 | 30 | ON  | 327.21 | ON  | 336.25 | NIL | 337.42 | NIL | 314.33 | NIL | 377.42 |
| 3721 pSYMA | ?_SMA0609        | CDS | 325226 | 325801 | + | 30 | 30 | ON  | 317.1  | ON  | 350.72 | NIL | 297.51 | NIL | 302.75 | NIL | 287.07 |
| 3722 pSYMA | ?_SMA0610        | CDS | 325807 | 326667 | + | 30 | 30 | NIL | 301.13 | NIL | 305.53 | NIL | 318.47 | NIL | 309.08 | NIL | 320.42 |
| 3723 pSYMA | lknX3:_SMA0612   | CDS | 326972 | 328627 | + | 30 | 30 | ON  | 312.17 | NIL | 398.68 | NIL | 368.44 | NIL | 380.38 | NIL | 347.66 |
| 3724 pSYMA | lknX3:_SMA0615   | CDS | 328632 | 328632 | + | 30 | 30 | ON  | 335.8  | ON  | 384.45 | ON  | 427.1  | ON  | 407.09 | ON  | 433.59 |
| 3725 pSYMA | lknX3:_SMA0616   | CDS | 329637 | 329577 | + | 30 | 30 | NIL | 306.22 | ON  | 475.59 | NIL | 353.87 | ON  | 418.57 | ON  | 418.57 |
| 3726 pSYMA | lknP3:_SMA0617   | CDS | 329668 | 330449 | + | 30 | 30 | NIL | 309.28 | ON  | 336.1  | NIL | 317.59 | ON  | 361.8  | NIL | 266.55 |
| 3727 pSYMA | ?_SMA0620        | CDS | 330668 | 331474 | + | 30 | 30 | NIL | 289.16 | ON  | 347.93 | NIL | 316.25 | NIL | 339.88 | NIL | 266.55 |
| 3728 pSYMA | lknI2:_SMA0621   | CDS | 331477 | 333744 | + | 31 | 31 | NIL | 339.59 | NIL | 299.6  | NIL | 324.16 | ON  | 347.39 | NIL | 334.17 |
| 3729 pSYMA | lknS2:_SMA0622   | CDS | 333741 | 334001 | + | 30 | 30 | NIL | 270.14 | NIL | 318.05 | NIL | 286.46 | ON  | 343.3  | NIL | 345.49 |
| 3730 pSYMA | ?_SMA0625        | CDS | 334433 | 334594 | + | 30 | 27 | NIL | 266.33 | NIL | 277.81 | NIL | 251.24 | NIL | 263.35 | NIL | 304.15 |
| 3731 pSYMA | ?_SMA0626        | CDS | 335117 | 336379 | + | 30 | 30 | NIL | 242.34 | NIL | 241.43 | NIL | 274.17 | ON  | 264.92 | NIL | 275.45 |
| 3732 pSYMA | lknQZ2:_SMA0627  | CDS | 336766 | 337464 | + | 30 | 29 | NIL | 366.55 | ON  | 390.48 | ON  | 425.14 | ON  | 375.81 | NIL | 383.72 |
| 3733 pSYMA | ?_SMA0629        | CDS | 337732 | 338109 | - | 30 | 30 | NIL | 292.31 | NIL | 304.71 | NIL | 318.49 | ON  | 337.74 | NIL | 367.44 |
| 3734 pSYMA | ?_SMA0630        | CDS | 338733 | 339704 | - | 34 | 34 | NIL | 306.42 | NIL | 306.84 | NIL | 345.35 | NIL | 308.14 | NIL | 326.98 |

|      |       |                 |     |        |          |    |    |     |          |     |         |     |        |     |         |     |         |
|------|-------|-----------------|-----|--------|----------|----|----|-----|----------|-----|---------|-----|--------|-----|---------|-----|---------|
| 3735 | ψSymA | ?_SMA0631       | CDS | 339652 | 340218 - | 30 | 30 | NIL | 316.4    | ON  | 328.94  | NIL | 314.82 | NIL | 298.37  | NIL | 291.93  |
| 3736 | ψSymA | ?_SMA0633       | CDS | 340397 | 340783 - | 30 | 30 | NIL | 308.45   | ON  | 305.46  | NIL | 352.4  | NIL | 320.54  | NIL | 342.84  |
| 3737 | ψSymA | ?_SMA0636       | CDS | 341499 | 342192 + | 30 | 30 | NIL | 346.58   | ON  | 340.71  | ON  | 404.31 | ON  | 383.17  | NIL | 360.94  |
| 3738 | ψSymA | ?_SMA0637       | CDS | 342992 | 342981 + | 30 | 30 | NIL | 279.15   | ON  | 295.73  | NIL | 350.5  | NIL | 316.97  | NIL | 322.31  |
| 3739 | ψSymA | ?_SMA0638       | CDS | 342978 | 342353 + | 30 | 30 | ON  | 361.76   | ON  | 387.64  | ON  | 494.97 | ON  | 416.39  | NIL | 330.64  |
| 3740 | ψSymA | ?_SMA0640       | CDS | 343440 | 344044 + | 31 | 30 | NIL | 283.43   | NIL | 298.69  | NIL | 334.83 | NIL | 300.91  | NIL | 304.39  |
| 3741 | ψSymA | ?_SMA0640       | CDS | 344135 | 344554 + | 34 | 29 | NIL | 254.15   | NIL | 247.14  | NIL | 318.49 | NIL | 288.59  | NIL | 281.18  |
| 3742 | ψSymA | ?_SMA0643       | CDS | 345407 | 345607 + | 30 | 30 | NIL | 287.3    | NIL | 263.24  | NIL | 342.03 | NIL | 330.87  | NIL | 283.4   |
| 3743 | ψSymA | ?_SMA0645       | CDS | 346584 | 346592 + | 30 | 30 | NIL | 235.03   | NIL | 238.22  | NIL | 228.49 | NIL | 232.47  | NIL | 263.48  |
| 3744 | ψSymA | ?_SMA0647       | CDS | 346110 | 346651 + | 30 | 30 | NIL | 242.97   | NIL | 278.19  | NIL | 342.03 | NIL | 232.47  | NIL | 301.75  |
| 3745 | ψSymA | ?_SMA0649       | CDS | 346459 | 346659 + | 30 | 30 | NIL | 268.75   | NIL | 289.33  | NIL | 260.47 | NIL | 272.56  | NIL | 288.78  |
| 3746 | ψSymA | ?_SMA0653       | CDS | 347075 | 347614 + | 30 | 30 | NIL | 273.39   | NIL | 284.06  | NIL | 277.71 | NIL | 289.4   | NIL | 300.14  |
| 3747 | ψSymA | ?_SMA0656       | CDS | 348248 | 349249 - | 63 | 1  | NIL | 252.07   | NIL | 284.06  | NIL | 270.31 | NIL | 281.76  | NIL | 298.01  |
| 3748 | ψSymA | ?_SMA0657       | CDS | 349400 | 349597 + | 33 | 20 | NIL | 250.33   | NIL | 308.1   | NIL | 270.31 | NIL | 306.16  | NIL | 287.32  |
| 3749 | ψSymA | ?_SMA0659       | CDS | 350023 | 350021 + | 35 | 22 | NIL | 290.33   | NIL | 308.1   | NIL | 309.46 | NIL | 306.16  | NIL | 287.32  |
| 3750 | ψSymA | ?_SMA0661       | CDS | 350388 | 350388   | 30 | 30 | NIL | 251.87   | NIL | 277.81  | NIL | 271.99 | NIL | 253.8   | NIL | 295.64  |
| 3751 | ψSymA | ?_SMA0662       | CDS | 350925 | 351560 + | 30 | 30 | NIL | 257.29   | NIL | 284.7   | NIL | 318.39 | NIL | 316.9   | NIL | 317.42  |
| 3752 | ψSymA | ?_SMA0663       | CDS | 351675 | 351944 - | 30 | 30 | NIL | 233.22   | NIL | 239     | NIL | 304.57 | NIL | 273.14  | NIL | 317.01  |
| 3753 | ψSymA | ?_SMA0664       | CDS | 352085 | 353842 + | 30 | 30 | NIL | 301.74   | NIL | 317.86  | NIL | 358.64 | ON  | 355.44  | NIL | 341.34  |
| 3754 | ψSymA | ?_SMA0665       | CDS | 352895 | 355117 - | 30 | 30 | NIL | 254.92   | NIL | 294.82  | NIL | 272.01 | NIL | 285.24  | NIL | 321.98  |
| 3755 | ψSymA | ?_SMA0667       | CDS | 353876 | 356016 + | 30 | 30 | NIL | 262.55   | NIL | 293.04  | NIL | 263.6  | NIL | 271.12  | NIL | 295.77  |
| 3756 | ψSymA | ?_SMA0669       | CDS | 355528 | 357249 + | 30 | 30 | NIL | 290.49   | NIL | 309.53  | NIL | 270.9  | NIL | 302.25  | NIL | 316.15  |
| 3757 | ψSymA | ?_SMA0670       | CDS | 356020 | 358213 + | 30 | 30 | NIL | 275.45   | ON  | 329.14  | ON  | 382.83 | ON  | 364.57  | NIL | 353.54  |
| 3758 | ψSymA | ?_SMA0673       | CDS | 357359 | 360012 + | 66 | 0  | ON  | 442.94   | ON  | 435.92  | ON  | 378.43 | ON  | 430.89  | NIL | 348.21  |
| 3759 | ψSymA | ?_SMA0674       | CDS | 358810 | 360349 - | 35 | 29 | NIL | 350.39   | ON  | 355.97  | NIL | 344.99 | ON  | 403.64  | NIL | 361.82  |
| 3760 | ψSymA | ?_SMA0675       | CDS | 360005 | 361542 - | 30 | 30 | NIL | 268.69   | NIL | 288.6   | NIL | 302.25 | NIL | 283.03  | NIL | 296.26  |
| 3761 | ψSymA | ?_SMA0677       | CDS | 361696 | 362670 - | 31 | 31 | NIL | 302.51   | NIL | 317.78  | ON  | 394.04 | ON  | 355.21  | NIL | 365.23  |
| 3762 | ψSymA | ?_SMA0678       | CDS | 362647 | 364025 - | 30 | 30 | NIL | 281.6    | NIL | 292.88  | NIL | 314.61 | NIL | 308.71  | NIL | 347.88  |
| 3763 | ψSymA | ?_SMA0680       | CDS | 364053 | 364601 - | 30 | 30 | NIL | 271.67   | NIL | 311.13  | NIL | 304.59 | NIL | 279.36  | NIL | 288.61  |
| 3764 | ψSymA | ?_SMA0682       | CDS | 364403 | 368596 - | 30 | 30 | NIL | 260.02   | NIL | 269.56  | NIL | 299.07 | NIL | 309.65  | NIL | 286.61  |
| 3765 | ψSymA | ?_SMA0683       | CDS | 368879 | 369865 - | 30 | 30 | NIL | 290.87   | NIL | 284.92  | NIL | 301.21 | NIL | 286.63  | NIL | 285.42  |
| 3766 | ψSymA | ?_SMA0684       | CDS | 369851 | 371216 - | 30 | 30 | NIL | 338.59   | ON  | 346.73  | NIL | 311.33 | ON  | 355.73  | ON  | 386.02  |
| 3767 | ψSymA | ?_SMA0687       | CDS | 369591 | 372458 - | 30 | 30 | NIL | 278.55   | NIL | 346.73  | NIL | 366.05 | ON  | 355.91  | NIL | 338.59  |
| 3768 | ψSymA | ?_SMA0689       | CDS | 371190 | 373435 - | 30 | 30 | NIL | 323.76   | NIL | 266.04  | NIL | 326.5  | NIL | 331.44  | NIL | 360.46  |
| 3769 | ψSymA | ?_SMA0690       | CDS | 373456 | 374856 - | 30 | 30 | NIL | 281.24   | NIL | 303.57  | ON  | 384.2  | ON  | 353.03  | NIL | 352.57  |
| 3770 | ψSymA | arcl1: SMA0693  | CDS | 375708 | 376973 + | 30 | 30 | NIL | 272.58   | NIL | 303.57  | NIL | 322.25 | NIL | 324.84  | NIL | 323.23  |
| 3771 | ψSymA | arcl1: SMA0695  | CDS | 376973 | 377977 + | 30 | 30 | NIL | 246.85   | NIL | 230.3   | NIL | 276.97 | NIL | 264.38  | NIL | 312.76  |
| 3772 | ψSymA | arcl1: SMA0697  | CDS | 377980 | 377980   | 30 | 30 | NIL | 251.42   | NIL | 258.22  | NIL | 277.29 | NIL | 283.07  | NIL | 285.66  |
| 3773 | ψSymA | ?_SMA0699       | CDS | 379173 | 379643 + | 30 | 30 | NIL | 265.41   | NIL | 263.23  | NIL | 314.1  | NIL | 282.14  | NIL | 295.41  |
| 3774 | ψSymA | ?_SMA0702       | CDS | 380049 | 380483 + | 30 | 30 | NIL | 270.9    | NIL | 254.7   | NIL | 271.37 | NIL | 252.13  | NIL | 287.91  |
| 3775 | ψSymA | depK2: SMA0705  | CDS | 380946 | 381940 - | 30 | 30 | NIL | 341.65   | ON  | 364.5   | ON  | 450.53 | NIL | 389.21  | NIL | 370.89  |
| 3776 | ψSymA | ?_SMA0707       | CDS | 381959 | 382921 + | 30 | 30 | ON  | 332.42   | NIL | 321.76  | ON  | 446.87 | ON  | 401.03  | NIL | 382.66  |
| 3777 | ψSymA | ?_SMA0708       | CDS | 382978 | 384087 + | 30 | 30 | ON  | 350.94   | ON  | 346.32  | ON  | 386.27 | NIL | 379.33  | NIL | 366.64  |
| 3778 | ψSymA | ?_SMA0709       | CDS | 384120 | 385385 + | 30 | 30 | NIL | 300.91   | NIL | 300.75  | NIL | 300.19 | NIL | 317.98  | NIL | 313.92  |
| 3779 | ψSymA | ?_SMA0710       | CDS | 385468 | 386373 + | 30 | 30 | NIL | 313.76   | NIL | 315.45  | NIL | 332.52 | NIL | 324.76  | NIL | 324.76  |
| 3780 | ψSymA | ?_SMA0711       | CDS | 386385 | 387215 + | 30 | 30 | ON  | 337.53   | ON  | 358.09  | NIL | 304.2  | NIL | 313.53  | NIL | 308.44  |
| 3781 | ψSymA | ?_SMA0713       | CDS | 387810 | 387810 + | 30 | 30 | NIL | 280.02   | NIL | 280.24  | NIL | 288.86 | NIL | 286.49  | NIL | 318.2   |
| 3782 | ψSymA | ?_SMA0714       | CDS | 387807 | 388304 + | 30 | 30 | NIL | 284.34   | NIL | 282.15  | NIL | 338.31 | NIL | 306.07  | NIL | 294.11  |
| 3783 | ψSymA | ?_SMA0715       | CDS | 388306 | 389286 + | 30 | 30 | ON  | 323.79   | NIL | 295.76  | NIL | 388.86 | NIL | 305.43  | NIL | 324.76  |
| 3784 | ψSymA | ?_SMA0717       | CDS | 388926 | 390974 + | 30 | 30 | ON  | 371.62   | ON  | 388.55  | NIL | 360.42 | NIL | 341.33  | NIL | 350.65  |
| 3785 | ψSymA | ?_SMA0719       | CDS | 391032 | 391751 + | 30 | 30 | ON  | 373.2    | ON  | 359.59  | NIL | 370.53 | ON  | 392.89  | NIL | 349.51  |
| 3786 | ψSymA | ?_SMA0722       | CDS | 391850 | 392461 + | 30 | 30 | ON  | 247.2    | NIL | 265.5   | NIL | 270.62 | NIL | 275.2   | NIL | 288.61  |
| 3787 | ψSymA | ?_SMA0723       | CDS | 392499 | 393287 + | 30 | 30 | NIL | 260.89   | NIL | 296.27  | NIL | 399.29 | NIL | 312.43  | NIL | 286.61  |
| 3788 | ψSymA | ?_SMA0725       | CDS | 393348 | 393524 + | 30 | 29 | NIL | 393.95   | NIL | 359.37  | ON  | 607.63 | ON  | 504.24  | NIL | 545.08  |
| 3789 | ψSymA | ?_SMA0726       | CDS | 394015 | 394269 + | 30 | 30 | NIL | 283.22   | NIL | 274.95  | NIL | 269.69 | NIL | 267.67  | NIL | 282.07  |
| 3790 | ψSymA | ?_SMA0728       | CDS | 394691 | 394891 + | 30 | 30 | NIL | 240.59   | NIL | 250.19  | NIL | 374.16 | NIL | 263.88  | NIL | 283.66  |
| 3791 | ψSymA | ?_SMA0731       | CDS | 395379 | 395579 + | 30 | 30 | NIL | 242.67   | NIL | 240.46  | NIL | 294.37 | NIL | 256.96  | NIL | 287.59  |
| 3792 | ψSymA | ?_SMA0734       | CDS | 395732 | 396098 + | 30 | 30 | NIL | 266.17   | NIL | 262.01  | NIL | 293.74 | NIL | 273.25  | NIL | 308.74  |
| 3793 | ψSymA | ?_SMA0736       | CDS | 396311 | 396385 + | 30 | 30 | NIL | 266.18   | NIL | 280.92  | NIL | 309.31 | NIL | 269.49  | NIL | 288.48  |
| 3794 | ψSymA | cspsd4: SMA0738 | CDS | 396650 | 396653 - | 30 | 30 | ON  | 532.58   | ON  | 462.61  | NIL | 299.3  | ON  | 417.28  | NIL | 364.56  |
| 3795 | ψSymA | ?_SMA0739       | CDS | 396954 | 397382 - | 30 | 30 | ON  | 290.35   | NIL | 290.69  | NIL | 276.77 | NIL | 318.96  | NIL | 296.59  |
| 3796 | ψSymA | ?_SMA0740       | CDS | 397665 | 398045 + | 30 | 30 | ON  | 331.22   | ON  | 328.14  | NIL | 327.73 | NIL | 331.94  | NIL | 305.06  |
| 3797 | ψSymA | ?_SMA0742       | CDS | 398183 | 398623 - | 30 | 30 | ON  | 249.63   | NIL | 256.32  | NIL | 277.39 | NIL | 268.14  | NIL | 304.06  |
| 3798 | ψSymA | grocL2: SMA0744 | CDS | 399043 | 400680 - | 33 | 3  | ON  | 5772.99  | ON  | 1815.19 | ON  | 585.51 | ON  | 1012.42 | ON  | 603.99  |
| 3799 | ψSymA | grocL2: SMA0745 | CDS | 400756 | 401052 - | 31 | 7  | ON  | 10365.04 | ON  | 3165.32 | ON  | 823.44 | ON  | 2273.96 | ON  | 1096.05 |
| 3800 | ψSymA | ?_SMA0747       | CDS | 401768 | 401768 + | 30 | 30 | NIL | 209.46   | NIL | 221.43  | NIL | 334.8  | NIL | 271.09  | NIL | 295.37  |
| 3801 | ψSymA | ?_SMA0748       | CDS | 402123 | 402587 + | 30 | 30 | ON  | 580.89   | ON  | 400.53  | NIL | 319.18 | NIL | 321.37  | NIL | 269.54  |
| 3802 | ψSymA | ?_SMA0750       | CDS | 403178 | 404056 - | 30 | 30 | NIL | 286.21   | NIL | 309.62  | NIL | 321.03 | NIL | 291.01  | NIL | 314.79  |
| 3803 | ψSymA | ?_SMA0751       | CDS | 404204 | 405442 + | 30 | 30 | NIL | 405442 + | NIL | 268.16  | NIL | 286.79 | NIL | 298.1   | NIL | 290.9   |
| 3804 | ψSymA | ?_SMA0752       | CDS | 405447 | 406508 + | 30 | 30 | NIL | 270.74   | NIL | 374.12  | NIL | 371.15 | ON  | 352.07  | ON  | 393.26  |
| 3805 | ψSymA | ?_SMA0753       | CDS | 406804 | 407496 - | 38 | 1  | NIL | 295.6    | NIL | 294.11  | NIL | 308.52 | NIL | 301.82  | NIL | 317.68  |
| 3806 | ψSymA | ?_SMA0754       | CDS | 407780 | 408706 + | 30 | 30 | NIL | 296.57   | NIL | 268.63  | NIL | 368.69 | NIL | 307.95  | NIL | 363.92  |

|            |                  |     |         |          |    |    |     |        |     |         |     |        |     |         |     |        |
|------------|------------------|-----|---------|----------|----|----|-----|--------|-----|---------|-----|--------|-----|---------|-----|--------|
| 3807 pSyMA | noD2: Sma0757    | CD5 | 40925.4 | 410186 + | 31 | 27 | ON  | 332.86 | ON  | 384.72  | NIL | 318.8  | NIL | 323.32  | NIL | 334.27 |
| 3808 pSyMA | noD2: Sma0758    | CD5 | 411080  | 411682 + | 35 | 5  | NIL | 248.05 | ON  | 255.16  | NIL | 275.47 | NIL | 251.94  | NIL | 291.82 |
| 3809 pSyMA | ?-Sma0759        | CD5 | 411913  | 412314 + | 33 | 28 | NIL | 281.23 | ON  | 325.67  | NIL | 300.71 | NIL | 318.54  | NIL | 307.03 |
| 3810 pSyMA | fix2: Sma0760    | CD5 | 412363  | 412710 + | 32 | 27 | NIL | 265.93 | ON  | 272.23  | NIL | 328.9  | NIL | 260.82  | NIL | 270.26 |
| 3811 pSyMA | fix2: Sma0762    | CD5 | 412790  | 413423 + | 43 | 9  | ON  | 326.32 | ON  | 324.01  | NIL | 350.33 | ON  | 344.88  | NIL | 325.95 |
| 3812 pSyMA | ?-Sma0763        | CD5 | 413437  | 414084 + | 36 | 24 | NIL | 271.14 | NIL | 298.16  | NIL | 303.82 | NIL | 291.13  | NIL | 290.06 |
| 3813 pSyMA | fixM2: Sma0765   | CD5 | 414187  | 415806 + | 34 | 28 | ON  | 337    | ON  | 345.18  | ON  | 366.51 | ON  | 366.51  | NIL | 359.05 |
| 3814 pSyMA | fixO2: Sma0766   | CD5 | 415818  | 416549 + | 30 | 30 | ON  | 313.55 | NIL | 310.37  | NIL | 329.16 | NIL | 321.5   | NIL | 336    |
| 3815 pSyMA | fixO2: Sma0767   | CD5 | 416561  | 416713 + | 30 | 29 | ON  | 322.45 | ON  | 361.56  | NIL | 362.55 | NIL | 333.93  | ON  | 398.45 |
| 3816 pSyMA | fixP2: Sma0769   | CD5 | 416717  | 417580 + | 30 | 30 | NIL | 294.95 | NIL | 290.57  | NIL | 308.6  | NIL | 326.25  | NIL | 326.04 |
| 3817 pSyMA | ?-Sma0771        | CD5 | 417769  | 418242 + | 30 | 30 | ON  | 318.82 | NIL | 299.32  | ON  | 427.04 | ON  | 414.57  | NIL | 300    |
| 3818 pSyMA | noD1: Sma0772    | CD5 | 418345  | 418896 + | 30 | 30 | NIL | 288.47 | NIL | 310.07  | NIL | 322.09 | NIL | 293.41  | NIL | 336.67 |
| 3819 pSyMA | noD4: Sma0773    | CD5 | 419284  | 420714 + | 30 | 30 | NIL | 232.42 | NIL | 268.53  | NIL | 247.3  | NIL | 229.85  | NIL | 267.66 |
| 3820 pSyMA | noD8: Sma0774    | CD5 | 420721  | 423282 + | 30 | 30 | NIL | 239.71 | NIL | 315.94  | ON  | 244.54 | NIL | 258.01  | NIL | 276.62 |
| 3821 pSyMA | ?-Sma0775        | CD5 | 422708  | 423034 - | 30 | 30 | NIL | 282.74 | NIL | 315.34  | ON  | 388.26 | NIL | 315.91  | NIL | 338.05 |
| 3822 pSyMA | ?-Sma0776        | CD5 | 423400  | 424177 - | 37 | 6  | NIL | 258.07 | NIL | 284.7   | NIL | 266.84 | NIL | 269.55  | NIL | 244.43 |
| 3823 pSyMA | ?-Sma0779        | CD5 | 424190  | 425086 - | 41 | 3  | NIL | 278.04 | NIL | 290.56  | NIL | 297.86 | NIL | 314.21  | NIL | 290.93 |
| 3824 pSyMA | ?-Sma0781        | CD5 | 425462  | 425911 + | 33 | 0  | ON  | 392.6  | ON  | 392.23  | NIL | 384.27 | ON  | 431.62  | NIL | 369.46 |
| 3825 pSyMA | ?-Sma0783        | CD5 | 425934  | 426203 + | 36 | 0  | NIL | 297.22 | NIL | 292.65  | NIL | 292.27 | NIL | 332.22  | NIL | 311.51 |
| 3826 pSyMA | ?-Sma0785        | CD5 | 426193  | 428239 + | 33 | 0  | NIL | 261.7  | NIL | 306.37  | NIL | 265.55 | NIL | 281.53  | NIL | 288.42 |
| 3827 pSyMA | ?-Sma0787        | CD5 | 428239  | 429057 - | 40 | 0  | NIL | 255.37 | NIL | 271.82  | NIL | 321.76 | NIL | 270.66  | NIL | 301.89 |
| 3828 pSyMA | ?-Sma0789        | CD5 | 429807  | 430136 + | 30 | 30 | ON  | 330.34 | NIL | 319.92  | NIL | 258.73 | NIL | 276.79  | NIL | 266.28 |
| 3829 pSyMA | ?-Sma0790        | CD5 | 430191  | 430403 - | 30 | 30 | NIL | 249.43 | ON  | 268.61  | NIL | 273.35 | NIL | 252.39  | NIL | 309.28 |
| 3830 pSyMA | ?-Sma0791        | CD5 | 430599  | 431201 + | 30 | 30 | ON  | 330.03 | ON  | 358.41  | NIL | 328.97 | ON  | 341.73  | NIL | 344.44 |
| 3831 pSyMA | ?-Sma0792        | CD5 | 431220  | 432053 + | 31 | 31 | NIL | 275.72 | NIL | 282.8   | NIL | 348.71 | NIL | 291.21  | NIL | 294.67 |
| 3832 pSyMA | ?-Sma0793        | CD5 | 432023  | 432985 + | 31 | 31 | NIL | 274.1  | NIL | 286.7   | NIL | 291.64 | NIL | 292.77  | NIL | 332.67 |
| 3833 pSyMA | ?-Sma0794        | CD5 | 432982  | 434022 + | 30 | 30 | NIL | 308.04 | ON  | 288.32  | NIL | 321.75 | NIL | 329.87  | NIL | 296.9  |
| 3834 pSyMA | ?-Sma0796        | CD5 | 434028  | 435491 + | 30 | 30 | ON  | 335.91 | ON  | 345.06  | NIL | 307.38 | ON  | 338.8   | NIL | 329.86 |
| 3835 pSyMA | ?-Sma0797        | CD5 | 435497  | 435823 + | 30 | 30 | NIL | 245.7  | NIL | 249.27  | NIL | 260.76 | NIL | 261.36  | NIL | 269.45 |
| 3836 pSyMA | ?-Sma0799        | CD5 | 435912  | 436871 + | 30 | 30 | NIL | 296.98 | NIL | 284.64  | NIL | 343.99 | ON  | 355.13  | NIL | 334.07 |
| 3837 pSyMA | ?-Sma0800        | CD5 | 436964  | 437839 + | 30 | 30 | NIL | 288.34 | NIL | 284.07  | NIL | 290.56 | NIL | 279.06  | NIL | 278.21 |
| 3838 pSyMA | ?-Sma0802        | CD5 | 438641  | 438641 + | 30 | 30 | NIL | 290.96 | NIL | 327.15  | NIL | 265.11 | NIL | 283.2   | NIL | 283.03 |
| 3839 pSyMA | ?-Sma0803        | CD5 | 438638  | 439717 + | 30 | 30 | NIL | 271.98 | NIL | 253.91  | NIL | 317.28 | NIL | 283.08  | NIL | 306.3  |
| 3840 pSyMA | gabD4: Sma0805   | CD5 | 439799  | 441271 + | 30 | 30 | NIL | 256.78 | NIL | 250.01  | NIL | 310.87 | NIL | 281.92  | NIL | 310.87 |
| 3841 pSyMA | ?-Sma0806        | CD5 | 441631  | 442086 + | 32 | 29 | ON  | 713.67 | NIL | 1365.15 | ON  | 580.33 | ON  | 1302.65 | ON  | 590.58 |
| 3842 pSyMA | ?-Sma0809        | CD5 | 442452  | 442967 + | 30 | 30 | NIL | 333.47 | NIL | 316.87  | NIL | 307.79 | ON  | 363.7   | NIL | 301.27 |
| 3843 pSyMA | fixJ: Sma0810    | CD5 | 443587  | 443793 - | 30 | 30 | NIL | 300.12 | NIL | 275.28  | ON  | 433.69 | NIL | 323.03  | NIL | 335.04 |
| 3844 pSyMA | fixN: Sma0811    | CD5 | 443981  | 444175 - | 30 | 30 | NIL | 285.17 | NIL | 287.94  | NIL | 322.97 | NIL | 312.56  | NIL | 317.09 |
| 3845 pSyMA | nifB: Sma0814    | CD5 | 444206  | 445678 - | 30 | 30 | NIL | 292.17 | NIL | 262.36  | NIL | 265.35 | NIL | 254.25  | NIL | 277.73 |
| 3846 pSyMA | nifA: Sma0815    | CD5 | 445895  | 447466 - | 30 | 30 | NIL | 295.5  | NIL | 292.43  | NIL | 336.85 | NIL | 325.51  | NIL | 329.63 |
| 3847 pSyMA | fixX: Sma0816    | CD5 | 447740  | 448036 - | 30 | 30 | NIL | 282.05 | NIL | 263.39  | NIL | 314.98 | NIL | 296.59  | NIL | 282.16 |
| 3848 pSyMA | fixC: Sma0817    | CD5 | 448049  | 449356 - | 30 | 30 | NIL | 293.05 | NIL | 297.58  | NIL | 328.9  | NIL | 303.12  | NIL | 308.09 |
| 3849 pSyMA | fixB: Sma0819    | CD5 | 449268  | 450429 - | 30 | 30 | NIL | 260.15 | NIL | 243.72  | NIL | 301.7  | NIL | 311.3   | NIL | 277.5  |
| 3850 pSyMA | fixA: Sma0822    | CD5 | 450461  | 451339 - | 30 | 30 | NIL | 264.28 | NIL | 275.16  | NIL | 340.05 | NIL | 303.63  | NIL | 306.03 |
| 3851 pSyMA | ?-Sma0824        | CD5 | 452858  | 453325 + | 30 | 30 | ON  | 275.91 | NIL | 269.59  | NIL | 325.88 | NIL | 303.2   | NIL | 323.72 |
| 3852 pSyMA | nifH: Sma0825    | CD5 | 453556  | 454449 + | 30 | 30 | ON  | 265.86 | ON  | 280.87  | ON  | 365.84 | ON  | 313.06  | ON  | 309.05 |
| 3853 pSyMA | nifD: Sma0827    | CD5 | 454549  | 456051 + | 30 | 30 | NIL | 268.63 | NIL | 269.74  | NIL | 291.08 | NIL | 276.03  | NIL | 314.66 |
| 3854 pSyMA | nifK: Sma0829    | CD5 | 456142  | 457683 + | 30 | 30 | NIL | 270.29 | NIL | 267.51  | NIL | 281.74 | NIL | 282.09  | NIL | 293.11 |
| 3855 pSyMA | nifE: Sma0830    | CD5 | 457737  | 459167 + | 30 | 30 | NIL | 266.88 | NIL | 246.17  | NIL | 282.17 | NIL | 276.47  | NIL | 312.35 |
| 3856 pSyMA | nifX: Sma0831    | CD5 | 459663  | 460163 + | 30 | 30 | NIL | 258.17 | NIL | 251.42  | NIL | 274.3  | NIL | 257.19  | NIL | 293.07 |
| 3857 pSyMA | ?-Sma0833        | CD5 | 460706  | 460846 + | 30 | 30 | NIL | 223.95 | NIL | 225.74  | NIL | 320.18 | NIL | 283.85  | NIL | 292.12 |
| 3858 pSyMA | fixB: Sma0834    | CD5 | 460843  | 461160 + | 30 | 30 | NIL | 263.26 | NIL | 248.27  | NIL | 312.21 | NIL | 282.44  | NIL | 311.21 |
| 3859 pSyMA | orf10.5: Sma0835 | CD5 | 461770  | 462060 + | 30 | 30 | NIL | 259.75 | NIL | 256.16  | NIL | 271.19 | NIL | 259.22  | NIL | 308.87 |
| 3860 pSyMA | SYN: Sma0838     | CD5 | 462211  | 462456 + | 30 | 30 | NIL | 239.49 | NIL | 249.12  | NIL | 243.3  | NIL | 234.58  | NIL | 281.35 |
| 3861 pSyMA | noD3: Sma0840    | CD5 | 462751  | 463892 - | 30 | 30 | NIL | 215.56 | NIL | 241.28  | NIL | 239.04 | NIL | 237.2   | NIL | 210.7  |
| 3862 pSyMA | ?-Sma0841        | CD5 | 462751  | 463892 - | 30 | 30 | NIL | 215.56 | NIL | 241.28  | NIL | 239.04 | NIL | 237.2   | NIL | 210.7  |
| 3863 pSyMA | ?-Sma0846        | CD5 | 463453  | 464802 + | 30 | 30 | NIL | 238.13 | NIL | 260.73  | NIL | 267.09 | NIL | 251.24  | NIL | 274.94 |
| 3864 pSyMA | ?-Sma0848        | CD5 | 463563  | 465620 + | 30 | 30 | NIL | 270.94 | NIL | 280.14  | ON  | 454.4  | NIL | 301.09  | NIL | 317.49 |
| 3865 pSyMA | SYN: Sma0849     | CD5 | 465944  | 466360 + | 30 | 30 | NIL | 250.54 | NIL | 266.41  | NIL | 253.8  | NIL | 244.5   | NIL | 295.36 |
| 3866 pSyMA | ?-Sma0850        | CD5 | 466418  | 467398 + | 30 | 30 | NIL | 304.92 | NIL | 295.96  | NIL | 314.86 | NIL | 314.54  | NIL | 348.3  |
| 3867 pSyMA | noD8: Sma0851    | CD5 | 467700  | 468065 - | 30 | 30 | NIL | 272.46 | NIL | 271.31  | NIL | 275.95 | NIL | 242.67  | NIL | 307.12 |
| 3868 pSyMA | noD4: Sma0852    | CD5 | 468199  | 468942 - | 30 | 30 | NIL | 258.44 | NIL | 231.94  | NIL | 243.32 | NIL | 242.67  | NIL | 298.14 |
| 3869 pSyMA | noE: Sma0853     | CD5 | 469631  | 469912 + | 30 | 30 | NIL | 294.38 | NIL | 292.34  | NIL | 319.42 | NIL | 306.25  | ON  | 379.76 |
| 3870 pSyMA | noD6: Sma0854    | CD5 | 469913  | 471121 + | 30 | 30 | NIL | 272.26 | NIL | 299.47  | NIL | 312.73 | NIL | 290.22  | NIL | 305.44 |
| 3871 pSyMA | noD7: Sma0855    | CD5 | 471615  | 472352 + | 30 | 30 | NIL | 287.23 | NIL | 295.25  | NIL | 357.01 | NIL | 325.73  | NIL | 305.59 |
| 3872 pSyMA | noD1: Sma0857    | CD5 | 473663  | 475588 + | 32 | 3  | ON  | 310.66 | NIL | 334.76  | NIL | 334.08 | ON  | 360.75  | NIL | 341.7  |
| 3873 pSyMA | ?-Sma0861        | CD5 | 473663  | 475588 + | 32 | 3  | ON  | 310.66 | NIL | 334.76  | NIL | 334.08 | ON  | 360.75  | NIL | 341.7  |
| 3874 pSyMA | noD1: Sma0863    | CD5 | 475986  | 476840 + | 30 | 30 | ON  | 320.82 | ON  | 333.01  | NIL | 332.11 | ON  | 382.45  | NIL | 322.42 |
| 3875 pSyMA | noD1: Sma0864    | CD5 | 477142  | 477930 - | 30 | 30 | ON  | 337.67 | ON  | 338.16  | NIL | 359.37 | NIL | 357.67  | NIL | 335.44 |
| 3876 pSyMA | noD1: Sma0866    | CD5 | 477934  | 479001 - | 30 | 30 | NIL | 309.91 | NIL | 288     | NIL | 363.6  | NIL | 316.12  | NIL | 340.73 |
| 3877 pSyMA | noD8: Sma0868    | CD5 | 479009  | 480289 - | 30 | 30 | NIL | 480957 | NIL | 292.04  | ON  | 288.6  | NIL | 272.14  | NIL | 288.6  |
| 3878 pSyMA | noD4: Sma0869    | CD5 | 480954  | 481544 - | 30 | 30 | NIL | 338.92 | NIL | 292.04  | ON  | 395.37 | ON  | 360.29  | ON  | 390.65 |
| 3879 pSyMA |                  | CD5 | 480954  | 481544 - | 30 | 30 | NIL | 270.16 | NIL | 280.28  | NIL | 336.07 | NIL | 307.1   | NIL | 367.54 |

|      |       |                |     |         |          |    |    |     |        |     |        |     |        |     |        |     |        |
|------|-------|----------------|-----|---------|----------|----|----|-----|--------|-----|--------|-----|--------|-----|--------|-----|--------|
| 3879 | ψSymA | modD1: SMA0870 | CDS | 481810  | 482736 + | 30 | 26 | NIL | 296.58 | NIL | 303.1  | NIL | 293.81 | NIL | 329.73 | NIL | 306.89 |
| 3880 | ψSymA | orfT1: SMA0872 | CDS | 483424  | 483756 + | 30 | 30 | NIL | 275.52 | NIL | 308.27 | NIL | 356.04 | NIL | 322.76 | NIL | 317.21 |
| 3881 | ψSymA | nH1: SMA0873   | CDS | 483756  | 485081 + | 30 | 30 | NIL | 281.01 | NIL | 287.08 | NIL | 296.23 | NIL | 285.41 | NIL | 318.77 |
| 3882 | ψSymA | modN: SMA0874  | CDS | 485169  | 485654 - | 30 | 30 | NIL | 280.99 | NIL | 283.1  | NIL | 288.73 | NIL | 280.76 | NIL | 295.53 |
| 3883 | ψSymA | molG: SMA0875  | CDS | 485661  | 488858 - | 30 | 30 | NIL | 262.58 | NIL | 289.2  | NIL | 265.95 | NIL | 266.21 | NIL | 296.23 |
| 3884 | ψSymA | molI: SMA0876  | CDS | 488661  | 489965 - | 30 | 30 | NIL | 316.87 | NIL | 321.49 | ON  | 386.58 | ON  | 386.67 | ON  | 334.79 |
| 3885 | ψSymA | modM: SMA0878  | CDS | 490023  | 491849 - | 34 | 6  | ON  | 468.23 | ON  | 499.74 | ON  | 395.24 | ON  | 431.73 | NIL | 382.57 |
| 3886 | ψSymA | ψ: SMA0882     | CDS | 492523  | 493113 - | 30 | 30 | NIL | 285.91 | ON  | 333.83 | NIL | 315.34 | NIL | 315.93 | NIL | 332.5  |
| 3887 | ψSymA | ψ: SMA0883     | CDS | 493138  | 493668 + | 30 | 30 | NIL | 298.41 | NIL | 316.99 | NIL | 298.72 | NIL | 325.17 | NIL | 306.41 |
| 3888 | ψSymA | ψ: SMA0886     | CDS | 493801  | 494535 - | 30 | 30 | NIL | 252.14 | NIL | 265.48 | NIL | 285.18 | NIL | 279.04 | NIL | 301.03 |
| 3889 | ψSymA | ψ: SMA0887     | CDS | 494568  | 495134 + | 30 | 30 | NIL | 274.84 | NIL | 288.38 | NIL | 245.29 | NIL | 267.72 | NIL | 305.99 |
| 3890 | ψSymA | ψ: SMA0888     | CDS | 495115  | 496014 + | 31 | 31 | NIL | 316.63 | NIL | 335.64 | ON  | 429.7  | ON  | 391.76 | ON  | 401.79 |
| 3891 | ψSymA | ψ: SMA0890     | CDS | 495115  | 497912 + | 30 | 30 | NIL | 269.83 | NIL | 256.64 | NIL | 306.22 | NIL | 291.58 | NIL | 313.05 |
| 3892 | ψSymA | ψ: SMA0898     | CDS | 497992  | 500655 + | 30 | 30 | NIL | 294.48 | NIL | 315.89 | NIL | 376.81 | NIL | 321.13 | NIL | 376.59 |
| 3893 | ψSymA | draE3: SMA0892 | CDS | 500772  | 501068 + | 30 | 30 | NIL | 267.41 | NIL | 293.45 | NIL | 263.14 | NIL | 264.34 | NIL | 295.19 |
| 3894 | ψSymA | ψ: SMA0894     | CDS | 501235  | 501954 + | 30 | 30 | NIL | 275.49 | NIL | 307.52 | NIL | 249.2  | NIL | 259.27 | NIL | 283.86 |
| 3895 | ψSymA | ψ: SMA0896     | CDS | 502545  | 503021 + | 30 | 30 | NIL | 268.09 | NIL | 273.93 | NIL | 247.97 | NIL | 265.41 | NIL | 286.5  |
| 3896 | ψSymA | ψ: SMA0900     | CDS | 503374  | 504357 + | 30 | 30 | NIL | 290.14 | NIL | 292.2  | NIL | 328.36 | NIL | 309.79 | NIL | 342.82 |
| 3897 | ψSymA | ψ: SMA0903     | CDS | 504447  | 504848 + | 30 | 30 | NIL | 299.67 | NIL | 302.14 | NIL | 307.38 | NIL | 267.22 | NIL | 302.54 |
| 3898 | ψSymA | ψ: SMA0905     | CDS | 504976  | 506214 - | 30 | 30 | ON  | 309.97 | ON  | 330.06 | NIL | 355.27 | ON  | 373.1  | NIL | 357.79 |
| 3899 | ψSymA | ψ: SMA0907     | CDS | 506549  | 507442 + | 30 | 30 | NIL | 290.21 | NIL | 312.26 | NIL | 337.54 | NIL | 308.38 | NIL | 292.43 |
| 3900 | ψSymA | ψ: SMA0909     | CDS | 507439  | 508479 + | 30 | 30 | NIL | 347.19 | ON  | 324.68 | NIL | 362.72 | ON  | 348.69 | NIL | 346.38 |
| 3901 | ψSymA | ψ: SMA0911     | CDS | 509807  | 509748 + | 30 | 30 | ON  | 328.82 | NIL | 313.63 | NIL | 346.03 | ON  | 376.74 | NIL | 346.63 |
| 3902 | ψSymA | ψ: SMA0914     | CDS | 509885  | 510211 + | 30 | 30 | NIL | 271.83 | NIL | 293.98 | ON  | 420.73 | NIL | 337.51 | NIL | 366.08 |
| 3903 | ψSymA | ψ: SMA0917     | CDS | 510853  | 511092 - | 30 | 30 | NIL | 222.69 | NIL | 256.7  | NIL | 223.61 | NIL | 224.19 | NIL | 276.72 |
| 3904 | ψSymA | ψ: SMA0922     | CDS | 511712  | 512080 + | 30 | 30 | NIL | 304.81 | ON  | 335.05 | ON  | 494.38 | NIL | 456.73 | NIL | 364.24 |
| 3905 | ψSymA | traG: SMA0929  | CDS | 513088  | 515007 - | 31 | 31 | ON  | 359.96 | ON  | 335.43 | NIL | 329.41 | ON  | 353.03 | NIL | 362.16 |
| 3906 | ψSymA | traD: SMA0930  | CDS | 514998  | 515937 - | 31 | 31 | ON  | 489.77 | ON  | 445.57 | ON  | 447    | ON  | 409.96 | ON  | 434.4  |
| 3907 | ψSymA | traC: SMA0933  | CDS | 515527  | 515514 - | 30 | 30 | NIL | 278.3  | NIL | 316.37 | NIL | 286.16 | NIL | 302.48 | NIL | 305.68 |
| 3908 | ψSymA | traA1: SMA0934 | CDS | 515693  | 520312 + | 51 | 6  | ON  | 309.06 | ON  | 337.97 | ON  | 405.02 | NIL | 373.62 | NIL | 314.75 |
| 3909 | ψSymA | ψ: SMA0937     | CDS | 520671  | 522920 - | 36 | 24 | NIL | 288.95 | NIL | 297.01 | NIL | 369.76 | NIL | 328.32 | NIL | 333.23 |
| 3910 | ψSymA | ψ: SMA0939     | CDS | 523213  | 525114 + | 30 | 30 | NIL | 272.46 | NIL | 280.66 | NIL | 317.59 | NIL | 318.05 | NIL | 306.2  |
| 3911 | ψSymA | ψ: SMA0940     | CDS | 525179  | 525733 + | 30 | 30 | NIL | 267.94 | NIL | 299.91 | NIL | 316.53 | NIL | 306.37 | NIL | 310.91 |
| 3912 | ψSymA | ψ: SMA0941     | CDS | 525923  | 526237 + | 30 | 30 | ON  | 323.62 | ON  | 369.03 | NIL | 382.86 | ON  | 304.64 | NIL | 318.22 |
| 3913 | ψSymA | ψ: SMA0943     | CDS | 526469  | 528106 + | 30 | 30 | ON  | 319.94 | ON  | 335.91 | ON  | 332.84 | ON  | 330.02 | NIL | 350.97 |
| 3914 | ψSymA | ψ: SMA0945     | CDS | 528169  | 528744 + | 30 | 30 | NIL | 236.07 | NIL | 307.63 | NIL | 343.15 | NIL | 309.07 | NIL | 309.14 |
| 3915 | ψSymA | ψ: SMA0947     | CDS | 529150  | 529464 + | 30 | 30 | NIL | 261.63 | NIL | 272.3  | NIL | 261.9  | NIL | 229.64 | NIL | 271.6  |
| 3916 | ψSymA | ψ: SMA0951     | CDS | 529782  | 530855 - | 30 | 30 | NIL | 317.18 | NIL | 270.35 | NIL | 305.29 | NIL | 287.6  | NIL | 321.77 |
| 3917 | ψSymA | ψ: SMA0950     | CDS | 530886  | 531749 - | 31 | 31 | ON  | 388.99 | ON  | 341.61 | NIL | 304.68 | NIL | 320.61 | NIL | 315.61 |
| 3918 | ψSymA | ψ: SMA0952     | CDS | 531739  | 532629 - | 31 | 31 | ON  | 380.53 | NIL | 318.52 | NIL | 276.58 | NIL | 288.6  | NIL | 286.52 |
| 3919 | ψSymA | ψ: SMA0953     | CDS | 532626  | 533744 - | 30 | 30 | NIL | 380.01 | NIL | 334.42 | NIL | 352.95 | NIL | 353.96 | NIL | 330.16 |
| 3920 | ψSymA | birA: SMA0955  | CDS | 534018  | 534710 + | 30 | 30 | NIL | 306.69 | NIL | 313.23 | NIL | 334.91 | NIL | 312.72 | NIL | 281.88 |
| 3921 | ψSymA | birB: SMA0956  | CDS | 534618  | 536179 + | 30 | 30 | ON  | 399.83 | NIL | 330.61 | NIL | 345.11 | NIL | 333.01 | NIL | 330.17 |
| 3922 | ψSymA | birC: SMA0958  | CDS | 536176  | 537888 + | 30 | 30 | ON  | 297.91 | NIL | 295.17 | NIL | 334.46 | NIL | 326.38 | NIL | 332.81 |
| 3923 | ψSymA | ψ: SMA0959     | CDS | 537885  | 538661 + | 30 | 30 | NIL | 337.07 | NIL | 317.47 | NIL | 352.36 | NIL | 326.15 | NIL | 313.58 |
| 3924 | ψSymA | ψ: SMA0961     | CDS | 538482  | 539404 + | 30 | 30 | ON  | 266.92 | NIL | 276.76 | NIL | 279.54 | NIL | 280.99 | NIL | 283.38 |
| 3925 | ψSymA | ψ: SMA0964     | CDS | 539452  | 539682 - | 30 | 30 | NIL | 266.58 | NIL | 263.65 | NIL | 280.74 | NIL | 266.29 | NIL | 283.57 |
| 3926 | ψSymA | ψ: SMA0967     | CDS | 539831  | 540688 - | 30 | 30 | NIL | 315.17 | ON  | 350.27 | NIL | 274.15 | NIL | 295.8  | NIL | 305.67 |
| 3927 | ψSymA | ψ: SMA0969     | CDS | 540977  | 541746 + | 30 | 30 | NIL | 260.27 | NIL | 271.7  | NIL | 288.4  | NIL | 315.17 | NIL | 316.77 |
| 3928 | ψSymA | ψ: SMA0972     | CDS | 541929  | 543182 + | 30 | 30 | NIL | 255.06 | NIL | 250.99 | NIL | 314.35 | NIL | 258.47 | NIL | 286    |
| 3929 | ψSymA | ψ: SMA0974     | CDS | 543237  | 543596 + | 30 | 30 | NIL | 261.18 | NIL | 244.36 | NIL | 315.22 | NIL | 317.61 | NIL | 352.15 |
| 3930 | ψSymA | ψ: SMA0976     | CDS | 543828  | 544616 - | 42 | 0  | NIL | 444.87 | ON  | 472.05 | ON  | 389.9  | ON  | 437.96 | ON  | 352.78 |
| 3931 | ψSymA | ψ: SMA0977     | CDS | 544943  | 545944 - | 64 | 0  | NIL | 275.91 | NIL | 284.21 | NIL | 285.8  | NIL | 292.1  | NIL | 307.57 |
| 3932 | ψSymA | nH2: SMA0981   | CDS | 546465  | 546884 - | 30 | 30 | NIL | 268.11 | NIL | 290.08 | NIL | 295.26 | NIL | 293.68 | NIL | 291.47 |
| 3933 | ψSymA | ψ: SMA0983     | CDS | 547033  | 547404 - | 30 | 30 | ON  | 345.38 | ON  | 347.4  | NIL | 352.13 | NIL | 326.36 | NIL | 303.63 |
| 3934 | ψSymA | ψ: SMA0985     | CDS | 547525  | 548286 - | 30 | 30 | NIL | 272.71 | NIL | 315.96 | NIL | 307.4  | NIL | 324.56 | NIL | 321.48 |
| 3935 | ψSymA | ψ: SMA0988     | CDS | 548397  | 548690 - | 30 | 30 | NIL | 249.26 | NIL | 244.24 | NIL | 269.5  | NIL | 289.12 | NIL | 267.57 |
| 3936 | ψSymA | ψ: SMA0990     | CDS | 549498  | 549827 + | 30 | 30 | NIL | 222.52 | NIL | 231.37 | NIL | 266.07 | NIL | 245.79 | ON  | 304    |
| 3937 | ψSymA | ψ: SMA0992     | CDS | 549845  | 550287 + | 30 | 30 | NIL | 303.96 | NIL | 318.03 | ON  | 412.58 | ON  | 346.19 | ON  | 384.6  |
| 3938 | ψSymA | ψ: SMA0994     | CDS | 550405  | 551069 + | 30 | 30 | NIL | 228.95 | NIL | 240.09 | NIL | 217.13 | NIL | 231.93 | NIL | 250.63 |
| 3939 | ψSymA | ψ: SMA0995     | CDS | 551249  | 552481 - | 75 | 3  | ON  | 644.11 | ON  | 704.27 | ON  | 451.55 | ON  | 503.82 | ON  | 395.37 |
| 3940 | ψSymA | ψ: SMA0997     | CDS | 553196  | 553492 + | 30 | 21 | NIL | 311.92 | NIL | 309.7  | NIL | 342.57 | ON  | 334.95 | NIL | 326.51 |
| 3941 | ψSymA | ψ: SMA0998     | CDS | 553316  | 555408 + | 30 | 28 | NIL | 256.82 | NIL | 246.97 | NIL | 350.13 | NIL | 306.93 | NIL | 337.22 |
| 3942 | ψSymA | ψ: SMA1001     | CDS | 5554230 | 555632 + | 31 | 27 | NIL | 283.23 | NIL | 321.83 | NIL | 312.2  | NIL | 292.84 | NIL | 305.99 |
| 3943 | ψSymA | ψ: SMA1002     | CDS | 555788  | 556162 + | 30 | 30 | NIL | 300.64 | NIL | 318.03 | NIL | 335.7  | NIL | 318.86 | NIL | 350.68 |
| 3944 | ψSymA | ψ: SMA1004     | CDS | 556399  | 557471 - | 30 | 28 | NIL | 226.97 | NIL | 267.4  | NIL | 255.86 | NIL | 250.37 | NIL | 285.31 |
| 3945 | ψSymA | ψ: SMA1005     | CDS | 556840  | 557640 + | 30 | 30 | ON  | 339.93 | NIL | 316.89 | NIL | 346    | NIL | 333.76 | NIL | 335.07 |
| 3946 | ψSymA | ψ: SMA1007     | CDS | 557826  | 558254 + | 30 | 30 | ON  | 344.57 | ON  | 334.71 | ON  | 404.8  | ON  | 344.58 | NIL | 348.59 |
| 3947 | ψSymA | ψ: SMA1008     | CDS | 558537  | 559145 - | 30 | 30 | NIL | 238.58 | NIL | 251.04 | NIL | 253.51 | NIL | 256.89 | NIL | 272.25 |
| 3948 | ψSymA | ψ: SMA1009     | CDS | 559131  | 559328 + | 30 | 30 | ON  | 355.46 | ON  | 536.03 | NIL | 381.97 | ON  | 532.46 | ON  | 480.33 |
| 3949 | ψSymA | ψ: SMA1010     | CDS | 559459  | 559965 - | 30 | 30 | ON  | 343.17 | ON  | 355.47 | ON  | 389.55 | ON  | 408.96 | NIL | 358.3  |
| 3950 | ψSymA | ψ: SMA1011     | CDS | 560008  | 560433 + | 30 | 30 | NIL | 294.58 | ON  | 325.4  | NIL | 323.86 | NIL | 315.7  | NIL | 330.11 |

|      |       |                |     |        |           |    |    |     |         |       |         |     |        |     |        |     |        |
|------|-------|----------------|-----|--------|-----------|----|----|-----|---------|-------|---------|-----|--------|-----|--------|-----|--------|
| 3951 | ψSyma | actp-SMa1013   | CDS | 560686 | 563166 +  | 30 | 30 | NIL | 273.03  | NIL   | 280.43  | NIL | 325.01 | NIL | 309.91 | NIL | 301.96 |
| 3952 | ψSyma | hmR-SMa1014    | CDS | 563252 | 563636 +  | 30 | 30 | NIL | 352.3   | NIL   | 362.82  | NIL | 411.14 | ON  | 438.05 | NIL | 363.28 |
| 3953 | ψSyma | ?-SMa1016      | CDS | 563673 | 564947 -  | 30 | 30 | NIL | 290.4   | NIL   | 265.14  | NIL | 258.53 | NIL | 274.65 | NIL | 334.87 |
| 3954 | ψSyma | ?-SMa1017      | CDS | 565090 | 565296 +  | 30 | 30 | NIL | 303.3   | NIL   | 316.79  | NIL | 326.86 | NIL | 318.19 | NIL | 333.07 |
| 3955 | ψSyma | ?-SMa1018      | CDS | 565293 | 565653 +  | 30 | 30 | NIL | 326.11  | NIL   | 299.36  | NIL | 293.24 | NIL | 313.49 | NIL | 330.28 |
| 3957 | ψSyma | ?-SMa1021      | CDS | 565836 | 566456 -  | 30 | 30 | NIL | 336.06  | NIL   | 358.25  | NIL | 357.33 | NIL | 328.24 | NIL | 321.86 |
| 3958 | ψSyma | ?-SMa1024      | CDS | 566897 | 567235 -  | 30 | 30 | NIL | 302.19  | NIL   | 319.5   | ON  | 565.94 | NIL | 426.75 | NIL | 364.94 |
| 3959 | ψSyma | ?-SMa1025      | CDS | 567528 | 567704 +  | 30 | 30 | NIL | 256.57  | NIL   | 275.31  | NIL | 308.2  | NIL | 274.11 | NIL | 307.77 |
| 3960 | ψSyma | ?-SMa1029      | CDS | 568081 | 567962 -  | 30 | 30 | NIL | 311.49  | ON    | 346.51  | NIL | 313.27 | NIL | 274.11 | NIL | 368.26 |
| 3961 | ψSyma | ?-SMa1030      | CDS | 568911 | 569279 -  | 74 | 0  | ON  | 539.44  | ON    | 419.21  | ON  | 309.11 | ON  | 358.27 | NIL | 305.8  |
| 3962 | ψSyma | ?-SMa1032      | CDS | 569808 | 569612 -  | 35 | 0  | NIL | 484.38  | ON    | 408.32  | NIL | 375.17 | ON  | 440.38 | ON  | 445.16 |
| 3963 | ψSyma | ?-SMa1033      | CDS | 569267 | 569612 -  | 30 | 30 | NIL | 270.46  | NIL   | 269.84  | NIL | 278.75 | NIL | 291.21 | NIL | 296.66 |
| 3964 | ψSyma | ?-SMa1036      | CDS | 569810 | 570190 +  | 30 | 30 | NIL | 530.12  | ON    | 762.91  | ON  | 421.59 | ON  | 510.52 | ON  | 414.36 |
| 3965 | ψSyma | ?-SMa1037      | CDS | 570243 | 570512 +  | 30 | 30 | ON  | 380.4   | ON    | 404.49  | ON  | 462.3  | ON  | 479.42 | ON  | 418.01 |
| 3966 | ψSyma | ?-SMa1038      | CDS | 570509 | 571975 +  | 30 | 29 | ON  | 328.22  | ON    | 387.83  | ON  | 399.18 | ON  | 392.46 | NIL | 376.01 |
| 3967 | ψSyma | ?-SMa1041      | CDS | 571980 | 573339 +  | 33 | 21 | ON  | 454.18  | 407.5 | 407.5   | ON  | 447.71 | ON  | 409.76 | ON  | 405.79 |
| 3968 | ψSyma | ?-SMa1041      | CDS | 573346 | 573858 +  | 30 | 28 | ON  | 1303.67 | ON    | 1556.43 | ON  | 646.77 | ON  | 738.41 | ON  | 733.76 |
| 3969 | ψSyma | ?-SMa1043      | CDS | 573878 | 574162 +  | 30 | 30 | ON  | 367.84  | ON    | 403.39  | NIL | 322.1  | NIL | 307.36 | NIL | 299.35 |
| 3970 | ψSyma | ?-SMa1046      | CDS | 574255 | 574542 +  | 30 | 30 | NIL | 301.44  | NIL   | 313.14  | NIL | 272.2  | NIL | 272.77 | NIL | 285.56 |
| 3971 | ψSyma | ?-SMa1046      | CDS | 574539 | 575606 +  | 30 | 30 | NIL | 363.86  | NIL   | 311.99  | ON  | 393.97 | NIL | 328.14 | NIL | 369.53 |
| 3972 | ψSyma | ?-SMa1050      | CDS | 576097 | 576642 -  | 30 | 30 | NIL | 306.14  | NIL   | 322.51  | NIL | 295.07 | NIL | 312.33 | NIL | 276.94 |
| 3973 | ψSyma | ?-SMa1052      | CDS | 576639 | 577070 -  | 31 | 31 | NIL | 369.84  | NIL   | 319.27  | NIL | 336.71 | ON  | 347.99 | NIL | 300.35 |
| 3974 | ψSyma | ?-SMa1053      | CDS | 577067 | 577477 -  | 31 | 31 | NIL | 296.24  | ON    | 350.11  | NIL | 337.04 | ON  | 334.03 | NIL | 336.42 |
| 3975 | ψSyma | ?-SMa1056      | CDS | 577474 | 577821 -  | 31 | 31 | ON  | 329.37  | ON    | 361.3   | ON  | 407.29 | ON  | 401.44 | ON  | 386.38 |
| 3976 | ψSyma | ?-SMa1057      | CDS | 577812 | 579110 -  | 30 | 30 | NIL | 357.65  | ON    | 337.81  | ON  | 394.01 | ON  | 374.94 | ON  | 376.63 |
| 3977 | ψSyma | ?-SMa1060      | CDS | 579109 | 579684 +  | 30 | 30 | NIL | 306.57  | ON    | 330.76  | NIL | 345.01 | ON  | 352.69 | NIL | 323.02 |
| 3978 | ψSyma | ?-SMa1062      | CDS | 579986 | 581383 -  | 32 | 32 | NIL | 265.5   | NIL   | 285.16  | NIL | 294.76 | NIL | 316.07 | NIL | 295.4  |
| 3979 | ψSyma | ?-SMa1063      | CDS | 582116 | 582322 -  | 34 | 34 | NIL | 244.82  | NIL   | 285.16  | NIL | 307.75 | NIL | 299.16 | NIL | 330.03 |
| 3980 | ψSyma | ?-SMa1065      | CDS | 582419 | 583207 -  | 30 | 30 | NIL | 224.82  | NIL   | 300.87  | NIL | 234.24 | NIL | 299.03 | NIL | 280.87 |
| 3981 | ψSyma | ?-SMa1067      | CDS | 583446 | 584192 +  | 30 | 30 | ON  | 323.33  | NIL   | 290.43  | ON  | 390.19 | NIL | 346.45 | NIL | 356.74 |
| 3982 | ψSyma | ?-SMa1070      | CDS | 584979 | 586571 +  | 73 | 8  | NIL | 276.36  | NIL   | 292.13  | NIL | 297.52 | NIL | 291.41 | NIL | 314.85 |
| 3983 | ψSyma | ?-SMa1073      | CDS | 584979 | 586571 +  | 30 | 30 | NIL | 264.59  | ON    | 290.56  | NIL | 292.69 | ON  | 309.2  | NIL | 292.69 |
| 3984 | ψSyma | ?-SMa1076      | CDS | 587855 | 587878 +  | 47 | 16 | NIL | 238.79  | NIL   | 277.48  | NIL | 267.1  | NIL | 253.37 | NIL | 263.13 |
| 3985 | ψSyma | next18-SMa1077 | CDS | 588313 | 5888313 - | 30 | 30 | ON  | 544.19  | ON    | 454.96  | NIL | 373.39 | ON  | 477.61 | ON  | 457.49 |
| 3986 | ψSyma | ?-SMa1078      | CDS | 588401 | 589083 +  | 30 | 30 | ON  | 504.11  | ON    | 482.95  | NIL | 352.21 | ON  | 397.22 | ON  | 426.77 |
| 3987 | ψSyma | tspo-SMa1079   | CDS | 589237 | 589937 +  | 30 | 30 | ON  | 433.54  | ON    | 442.96  | NIL | 386.94 | ON  | 363.73 | ON  | 394.07 |
| 3988 | ψSyma | ?-SMa1081      | CDS | 589343 | 589885 +  | 30 | 30 | NIL | 295.15  | ON    | 331.23  | NIL | 332.82 | NIL | 311.09 | ON  | 345.59 |
| 3989 | ψSyma | ?-SMa1082      | CDS | 589907 | 590068 +  | 30 | 30 | ON  | 339.9   | ON    | 349.07  | ON  | 422.95 | ON  | 378.54 | NIL | 393.79 |
| 3990 | ψSyma | ?-SMa1084      | CDS | 590350 | 591129 -  | 30 | 30 | ON  | 590350  | ON    | 325.28  | NIL | 368.57 | ON  | 377.17 | ON  | 377.17 |
| 3991 | ψSyma | ?-SMa1086      | CDS | 591065 | 593404 -  | 30 | 30 | NIL | 593404  | ON    | 302.01  | NIL | 323.43 | NIL | 305.69 | NIL | 327.11 |
| 3992 | ψSyma | ?-SMa1087      | CDS | 594366 | 596597 +  | 31 | 31 | NIL | 594366  | ON    | 305.62  | NIL | 398.87 | NIL | 313.4  | NIL | 312.48 |
| 3993 | ψSyma | ?-SMa1089      | CDS | 596594 | 596797 +  | 30 | 30 | NIL | 265.47  | ON    | 339.72  | ON  | 474.61 | ON  | 421.67 | ON  | 411.44 |
| 3994 | ψSyma | ?-SMa1091      | CDS | 596794 | 597297 +  | 30 | 26 | NIL | 265.47  | NIL   | 265.47  | NIL | 265.62 | NIL | 269.17 | NIL | 272.13 |
| 3995 | ψSyma | ?-SMa1092      | CDS | 597521 | 598030 -  | 30 | 28 | NIL | 296.22  | ON    | 302.14  | NIL | 346.64 | NIL | 310.1  | NIL | 317.91 |
| 3996 | ψSyma | ?-SMa1093      | CDS | 598128 | 598616 +  | 30 | 30 | ON  | 322.48  | ON    | 355.66  | NIL | 304.97 | ON  | 352.7  | NIL | 323.62 |
| 3997 | ψSyma | ?-SMa1095      | CDS | 598804 | 599112 +  | 30 | 30 | ON  | 306.67  | NIL   | 302.9   | NIL | 326.33 | NIL | 307.87 | NIL | 337.88 |
| 3998 | ψSyma | ?-SMa1096      | CDS | 599155 | 599616 +  | 31 | 31 | NIL | 278.34  | NIL   | 277.61  | NIL | 340.16 | NIL | 323.35 | NIL | 323.46 |
| 3999 | ψSyma | ?-SMa1097      | CDS | 599529 | 600044 -  | 32 | 32 | NIL | 238.92  | NIL   | 257.98  | NIL | 280.03 | NIL | 262.5  | NIL | 308.98 |
| 4000 | ψSyma | cxcB1-SMa1099  | CDS | 600212 | 600526 -  | 30 | 29 | NIL | 238.92  | NIL   | 281.33  | NIL | 268.46 | NIL | 261.29 | NIL | 300.45 |
| 4001 | ψSyma | ?-SMa1100      | CDS | 600957 | 601418 +  | 30 | 30 | NIL | 269.8   | NIL   | 278.96  | NIL | 299.26 | NIL | 295.02 | NIL | 308.44 |
| 4002 | ψSyma | ?-SMa1101      | CDS | 601408 | 601827 +  | 30 | 30 | NIL | 280.69  | NIL   | 285.7   | NIL | 286.71 | NIL | 257.31 | NIL | 278.27 |
| 4003 | ψSyma | ?-SMa1103      | CDS | 601805 | 602359 +  | 30 | 30 | NIL | 280.77  | NIL   | 301.07  | NIL | 331.79 | NIL | 294.44 | NIL | 307.9  |
| 4004 | ψSyma | ?-SMa1104      | CDS | 604238 | 604468 -  | 30 | 30 | NIL | 241.04  | NIL   | 264.99  | NIL | 233.49 | NIL | 248.25 | NIL | 298.73 |
| 4005 | ψSyma | ?-SMa1111      | CDS | 604938 | 605630 +  | 30 | 27 | ON  | 360.59  | ON    | 322.75  | ON  | 409.72 | ON  | 404.82 | ON  | 403.16 |
| 4006 | ψSyma | ?-SMa1113      | CDS | 606027 | 606329 +  | 30 | 29 | NIL | 269.63  | NIL   | 262.84  | NIL | 343.38 | NIL | 286.58 | NIL | 324.76 |
| 4007 | ψSyma | ?-SMa1115      | CDS | 606247 | 607890 +  | 31 | 29 | NIL | 292.3   | ON    | 333.16  | NIL | 340.98 | NIL | 310.83 | NIL | 355.89 |
| 4008 | ψSyma | hspC2-SMa1118  | CDS | 608463 | 609210 +  | 30 | 27 | NIL | 289.02  | NIL   | 280.43  | NIL | 323.54 | NIL | 310.71 | NIL | 320.14 |
| 4009 | ψSyma | ?-SMa1120      | CDS | 609267 | 610181 +  | 30 | 30 | NIL | 273.11  | NIL   | 273.53  | NIL | 323.67 | NIL | 316.4  | NIL | 320.14 |
| 4010 | ψSyma | ?-SMa1122      | CDS | 610188 | 612551 +  | 30 | 30 | ON  | 339.39  | ON    | 328.66  | NIL | 328.64 | NIL | 322.26 | NIL | 301.29 |
| 4011 | ψSyma | ?-SMa1124      | CDS | 612555 | 613754 +  | 30 | 27 | ON  | 309.74  | NIL   | 299.81  | NIL | 322.14 | NIL | 312.81 | NIL | 284.84 |
| 4012 | ψSyma | ?-SMa1126      | CDS | 613774 | 614892 -  | 30 | 30 | ON  | 292.67  | NIL   | 305.03  | NIL | 337.67 | NIL | 301.32 | NIL | 316.69 |
| 4013 | ψSyma | degP4-SMa1128  | CDS | 614946 | 616352 -  | 30 | 30 | ON  | 343.82  | NIL   | 316     | NIL | 337.67 | NIL | 311.32 | NIL | 352.93 |
| 4014 | ψSyma | ?-SMa1131      | CDS | 616469 | 618064 -  | 30 | 30 | NIL | 312.85  | NIL   | 339.8   | NIL | 351.89 | NIL | 306.17 | NIL | 353.52 |
| 4015 | ψSyma | ?-SMa1132      | CDS | 618493 | 618882 +  | 30 | 30 | NIL | 312.85  | NIL   | 302.89  | NIL | 322.37 | NIL | 285.07 | NIL | 336.47 |
| 4016 | ψSyma | ?-SMa1134      | CDS | 618930 | 619516 +  | 30 | 30 | NIL | 304.43  | NIL   | 271.47  | NIL | 322.37 | NIL | 295.28 | NIL | 308.98 |
| 4017 | ψSyma | ?-SMa1136      | CDS | 619852 | 620313 +  | 30 | 30 | NIL | 277.46  | NIL   | 256.96  | NIL | 322.37 | NIL | 307.09 | NIL | 265.15 |
| 4018 | ψSyma | ?-SMa1138      | CDS | 620365 | 620836 -  | 31 | 31 | NIL | 289.39  | NIL   | 319.3   | NIL | 330.16 | NIL | 330.47 | NIL | 286.11 |
| 4019 | ψSyma | ?-SMa1139      | CDS | 620850 | 621116 -  | 30 | 30 | NIL | 304     | NIL   | 289.1   | NIL | 288.67 | NIL | 293.65 | NIL | 334.11 |
| 4020 | ψSyma | ?-SMa1141      | CDS | 621245 | 622009 +  | 30 | 30 | NIL | 295.38  | NIL   | 299.39  | NIL | 329.72 | NIL | 299.95 | NIL | 287.56 |
| 4021 | ψSyma | ?-SMa1142      | CDS | 622009 | 623695 +  | 30 | 30 | NIL | 295.38  | NIL   | 316.21  | NIL | 352.72 | NIL | 335.86 | NIL | 342.01 |
| 4022 | ψSyma | ?-SMa1146      | CDS | 623735 | 626434 +  | 30 | 30 | NIL | 299.81  | NIL   | 280.01  | NIL | 329.51 | NIL | 283.62 | NIL | 289.3  |

|      |       |           |     |         |         |   |    |    |     |        |     |        |     |        |     |        |     |        |     |        |
|------|-------|-----------|-----|---------|---------|---|----|----|-----|--------|-----|--------|-----|--------|-----|--------|-----|--------|-----|--------|
| 4003 | psymA | ?-SMA1147 | CDS | 626.512 | 627.336 | + | 30 | 30 | NIL | 272.23 | NIL | 260.8  | NIL | 359.63 | NIL | 337.23 | NIL | 329.73 | NIL | 337.33 |
| 4004 | psymA | ?-SMA1149 | CDS | 628.937 | 628.937 | + | 30 | 30 | NIL | 301.6  | NIL | 337.59 | NIL | 330.63 | NIL | 337.59 | NIL | 335.41 | NIL | 335.41 |
| 4005 | psymA | ?-SMA1151 | CDS | 628.821 | 628.821 | - | 30 | 30 | NIL | 255.43 | NIL | 271.36 | NIL | 257.9  | NIL | 273.06 | NIL | 273.06 | NIL | 273.06 |
| 4006 | psymA | ?-SMA1153 | CDS | 629.967 | 629.967 | + | 30 | 30 | NIL | 302.31 | NIL | 331.5  | NIL | 370.25 | NIL | 347.66 | NIL | 342.3  | NIL | 342.3  |
| 4007 | psymA | ?-SMA1154 | CDS | 629.174 | 629.174 | + | 30 | 30 | NIL | 248.94 | NIL | 257.22 | NIL | 243    | NIL | 237.69 | NIL | 297.83 | NIL | 297.83 |
| 4008 | psymA | ?-SMA1155 | CDS | 630.205 | 630.205 | + | 30 | 30 | NIL | 310.03 | NIL | 316.93 | NIL | 379.25 | NIL | 379.25 | NIL | 377.87 | NIL | 377.87 |
| 4009 | psymA | ?-SMA1156 | CDS | 632.973 | 634.06  | + | 30 | 30 | NIL | 300.45 | NIL | 293.21 | NIL | 345.49 | NIL | 345.49 | NIL | 313.06 | NIL | 313.06 |
| 4010 | psymA | ?-SMA1158 | CDS | 634.156 | 635.07  | + | 30 | 30 | NIL | 314.75 | NIL | 319.7  | NIL | 329.56 | NIL | 329.56 | NIL | 339.42 | NIL | 339.42 |
| 4011 | psymA | ?-SMA1159 | CDS | 635.179 | 635.862 | - | 30 | 30 | NIL | 266.8  | NIL | 292.16 | NIL | 292.16 | NIL | 304.17 | NIL | 284.5  | NIL | 284.5  |
| 4012 | psymA | ?-SMA1160 | CDS | 635.570 | 636.151 | + | 30 | 30 | NIL | 345.54 | NIL | 362.84 | NIL | 344.84 | NIL | 344.84 | NIL | 349.96 | NIL | 349.96 |
| 4013 | psymA | ?-SMA1161 | CDS | 635.570 | 636.151 | + | 30 | 30 | NIL | 291.41 | NIL | 263.95 | NIL | 243.41 | NIL | 258.39 | NIL | 258.39 | NIL | 258.39 |
| 4014 | psymA | ?-SMA1162 | CDS | 635.570 | 636.151 | + | 30 | 29 | NIL | 330.26 | NIL | 330.26 | NIL | 334.74 | NIL | 334.74 | NIL | 331.61 | NIL | 331.61 |
| 4015 | psymA | ?-SMA1163 | CDS | 635.570 | 636.151 | + | 30 | 30 | NIL | 330.96 | NIL | 330.96 | NIL | 333.91 | NIL | 333.91 | NIL | 333.91 | NIL | 333.91 |
| 4016 | psymA | ?-SMA1164 | CDS | 635.570 | 636.151 | + | 30 | 30 | NIL | 330.96 | NIL | 330.96 | NIL | 333.91 | NIL | 333.91 | NIL | 333.91 | NIL | 333.91 |
| 4017 | psymA | ?-SMA1165 | CDS | 635.570 | 636.151 | + | 30 | 30 | NIL | 330.96 | NIL | 330.96 | NIL | 333.91 | NIL | 333.91 | NIL | 333.91 | NIL | 333.91 |
| 4018 | psymA | ?-SMA1166 | CDS | 635.570 | 636.151 | + | 30 | 30 | NIL | 330.96 | NIL | 330.96 | NIL | 333.91 | NIL | 333.91 | NIL | 333.91 | NIL | 333.91 |
| 4019 | psymA | ?-SMA1167 | CDS | 635.570 | 636.151 | + | 30 | 30 | NIL | 330.96 | NIL | 330.96 | NIL | 333.91 | NIL | 333.91 | NIL | 333.91 | NIL | 333.91 |
| 4020 | psymA | ?-SMA1168 | CDS | 635.570 | 636.151 | + | 30 | 30 | NIL | 330.96 | NIL | 330.96 | NIL | 333.91 | NIL | 333.91 | NIL | 333.91 | NIL | 333.91 |
| 4021 | psymA | ?-SMA1169 | CDS | 635.570 | 636.151 | + | 30 | 30 | NIL | 330.96 | NIL | 330.96 | NIL | 333.91 | NIL | 333.91 | NIL | 333.91 | NIL | 333.91 |
| 4022 | psymA | ?-SMA1170 | CDS | 635.570 | 636.151 | + | 30 | 30 | NIL | 330.96 | NIL | 330.96 | NIL | 333.91 | NIL | 333.91 | NIL | 333.91 | NIL | 333.91 |
| 4023 | psymA | ?-SMA1171 | CDS | 635.570 | 636.151 | + | 30 | 30 | NIL | 330.96 | NIL | 330.96 | NIL | 333.91 | NIL | 333.91 | NIL | 333.91 | NIL | 333.91 |
| 4024 | psymA | ?-SMA1172 | CDS | 635.570 | 636.151 | + | 30 | 30 | NIL | 330.96 | NIL | 330.96 | NIL | 333.91 | NIL | 333.91 | NIL | 333.91 | NIL | 333.91 |
| 4025 | psymA | ?-SMA1173 | CDS | 635.570 | 636.151 |   |    |    |     |        |     |        |     |        |     |        |     |        |     |        |

|      |       |                |     |        |          |    |    |     |        |     |        |     |        |     |        |     |        |
|------|-------|----------------|-----|--------|----------|----|----|-----|--------|-----|--------|-----|--------|-----|--------|-----|--------|
| 4095 | psYma | noD: SMA1269   | CDS | 693908 | 695803 - | 30 | 30 | ON  | 349.75 | ON  | 329.29 | ON  | 397.93 | ON  | 374.57 | ON  | 375.01 |
| 4096 | psYma | noB: SMA1272   | CDS | 695808 | 696826 - | 30 | 30 | ON  | 363.18 | ON  | 361.98 | ON  | 390.99 | ON  | 361.05 | ON  | 384.64 |
| 4097 | psYma | noB: SMA1273   | CDS | 696846 | 698032 - | 30 | 30 | NIL | 297.22 | ON  | 330.25 | NIL | 282.03 | NIL | 292.41 | NIL | 316.62 |
| 4098 | psYma | noE: SMA1276   | CDS | 698057 | 698509 - | 30 | 30 | ON  | 316.09 | ON  | 338.68 | ON  | 427.21 | NIL | 317.07 | ON  | 385.56 |
| 4099 | psYma | noE: SMA1279   | CDS | 698568 | 699534 - | 30 | 30 | ON  | 315.15 | ON  | 323.93 | NIL | 257.48 | NIL | 270.21 | NIL | 264.7  |
| 4100 | psYma | ?_SMA1283      | CDS | 700220 | 700906 + | 30 | 30 | NIL | 300.39 | ON  | 331.97 | NIL | 326.02 | NIL | 317.69 | NIL | 322.28 |
| 4101 | psYma | ?_SMA1285      | CDS | 701272 | 701874 - | 30 | 30 | NIL | 326.53 | NIL | 351.94 | NIL | 370.58 | NIL | 336.6  | NIL | 322.99 |
| 4102 | psYma | ?_SMA1288      | CDS | 703379 | 703379 - | 30 | 30 | ON  | 409.43 | ON  | 356.7  | ON  | 422.54 | ON  | 455.76 | ON  | 404.96 |
| 4103 | psYma | ?_SMA1289      | CDS | 703500 | 704006 + | 30 | 30 | ON  | 369.31 | ON  | 399.73 | ON  | 480.88 | ON  | 452.54 | ON  | 385.64 |
| 4104 | psYma | ?_SMA1291      | CDS | 704977 | 704974 + | 30 | 30 | ON  | 358.53 | ON  | 366.56 | NIL | 366.32 | ON  | 455.76 | ON  | 422.24 |
| 4105 | psYma | ?_SMA1292      | CDS | 705916 | 705916 + | 30 | 30 | ON  | 317.98 | ON  | 335.88 | NIL | 324.37 | NIL | 363.7  | NIL | 328.8  |
| 4106 | psYma | ?_SMA1294      | CDS | 706594 | 706397 + | 30 | 30 | NIL | 368.88 | NIL | 367.73 | ON  | 397.86 | ON  | 412.59 | ON  | 399.29 |
| 4107 | psYma | adBA1: SMA1296 | CDS | 706855 | 707877 + | 30 | 30 | NIL | 315.55 | NIL | 322.09 | ON  | 337.13 | ON  | 601.54 | ON  | 394.84 |
| 4108 | psYma | ?_SMA1297      | CDS | 708125 | 708712 - | 32 | 32 | NIL | 322.93 | NIL | 347.13 | ON  | 350.86 | ON  | 349.38 | NIL | 332.02 |
| 4109 | psYma | ?_SMA1298      | CDS | 708467 | 709021 + | 31 | 31 | NIL | 267.24 | NIL | 283.22 | NIL | 311.07 | NIL | 304.73 | NIL | 332.21 |
| 4110 | psYma | ?_SMA1299      | CDS | 709054 | 709645 + | 30 | 30 | ON  | 346.27 | NIL | 276.24 | ON  | 382.07 | ON  | 383.4  | ON  | 388.43 |
| 4111 | psYma | ?_SMA1301      | CDS | 709769 | 710926 + | 30 | 30 | ON  | 317.09 | NIL | 291.63 | NIL | 360.46 | NIL | 335.44 | NIL | 330.66 |
| 4112 | psYma | vrB1i: SMA1302 | CDS | 711238 | 712227 - | 30 | 30 | NIL | 274.25 | NIL | 291.63 | NIL | 278.1  | NIL | 303.6  | NIL | 282.56 |
| 4113 | psYma | vrB1i: SMA1303 | CDS | 712238 | 713410 - | 30 | 30 | NIL | 279.38 | NIL | 308.42 | NIL | 365.64 | NIL | 309.11 | NIL | 365.31 |
| 4114 | psYma | vrB9: SMA1306  | CDS | 713420 | 714274 - | 31 | 31 | NIL | 342.85 | ON  | 329.56 | NIL | 363.58 | ON  | 359.12 | NIL | 370.18 |
| 4115 | psYma | vrB8: SMA1308  | CDS | 714274 | 714945 - | 30 | 30 | NIL | 284.82 | ON  | 327.45 | NIL | 310.15 | NIL | 318.37 | NIL | 294.24 |
| 4116 | psYma | ?_SMA1310      | CDS | 714950 | 715168 - | 30 | 30 | NIL | 328.71 | ON  | 388.33 | ON  | 433.53 | ON  | 435.13 | ON  | 393.91 |
| 4117 | psYma | vrB6: SMA1311  | CDS | 715261 | 716202 - | 30 | 30 | NIL | 307.33 | ON  | 326.28 | NIL | 275.72 | NIL | 276.19 | NIL | 282.09 |
| 4118 | psYma | vrB5: SMA1313  | CDS | 716432 | 717049 - | 30 | 30 | NIL | 268.41 | NIL | 301.48 | NIL | 294.08 | NIL | 306.93 | NIL | 339.11 |
| 4119 | psYma | vrB4: SMA1315  | CDS | 717133 | 717951 - | 32 | 32 | NIL | 309.42 | ON  | 329.82 | NIL | 364.49 | NIL | 326.76 | NIL | 330.73 |
| 4120 | psYma | vrB3: SMA1318  | CDS | 719504 | 719782 - | 30 | 30 | NIL | 238.11 | NIL | 294.88 | NIL | 295.58 | NIL | 255.02 | NIL | 287.7  |
| 4121 | psYma | vrB2: SMA1319  | CDS | 719850 | 720149 - | 31 | 31 | NIL | 246.39 | NIL | 298.79 | NIL | 280.93 | NIL | 261.96 | NIL | 266.44 |
| 4122 | psYma | vrB1: SMA1321  | CDS | 720146 | 720817 - | 30 | 30 | ON  | 311.24 | NIL | 319.01 | NIL | 362.22 | ON  | 350.14 | NIL | 319.97 |
| 4123 | psYma | ?_SMA1322      | CDS | 720821 | 721339 - | 30 | 30 | ON  | 315.7  | NIL | 288.3  | ON  | 379.03 | ON  | 348.64 | NIL | 279.82 |
| 4124 | psYma | ?_SMA1323      | CDS | 721436 | 721804 + | 30 | 30 | NIL | 302.51 | ON  | 324.18 | NIL | 244.14 | NIL | 309.6  | NIL | 297.67 |
| 4125 | psYma | ?_SMA1325      | CDS | 722065 | 722316 - | 30 | 30 | NIL | 287.85 | NIL | 290.99 | NIL | 265.81 | ON  | 289.1  | NIL | 302.83 |
| 4126 | psYma | ?_SMA1326      | CDS | 723037 | 723037 - | 30 | 30 | ON  | 383.64 | ON  | 395.51 | ON  | 384.96 | ON  | 375.09 | NIL | 373.85 |
| 4127 | psYma | ?_SMA1327      | CDS | 723087 | 723935 - | 30 | 30 | ON  | 329.41 | ON  | 390.81 | ON  | 398.77 | ON  | 353.6  | NIL | 337.83 |
| 4128 | psYma | ?_SMA1328      | CDS | 724533 | 725855 - | 30 | 30 | NIL | 269.14 | NIL | 286.05 | NIL | 257.63 | NIL | 303.09 | NIL | 295.76 |
| 4129 | psYma | ?_SMA1329      | CDS | 726444 | 727637 - | 30 | 30 | NIL | 309.37 | NIL | 294.89 | NIL | 296.04 | NIL | 315.38 | NIL | 316.59 |
| 4130 | psYma | ?_SMA1331      | CDS | 727741 | 728154 - | 30 | 30 | NIL | 279.33 | NIL | 299.72 | NIL | 297.95 | NIL | 302.65 | NIL | 338.85 |
| 4131 | psYma | ?_SMA1332      | CDS | 728184 | 729026 - | 30 | 30 | NIL | 297.88 | NIL | 273.53 | NIL | 299.17 | NIL | 300.87 | NIL | 304.19 |
| 4132 | psYma | ?_SMA1334      | CDS | 729038 | 730234 - | 30 | 30 | NIL | 284.72 | NIL | 303.07 | NIL | 325.81 | NIL | 322.82 | NIL | 314.54 |
| 4133 | psYma | ?_SMA1335      | CDS | 730349 | 731041 - | 30 | 30 | NIL | 330.73 | ON  | 344.6  | NIL | 358.25 | ON  | 358.38 | NIL | 341.64 |
| 4134 | psYma | ?_SMA1337      | CDS | 732412 | 732644 + | 30 | 30 | NIL | 306.8  | ON  | 354.83 | NIL | 336.09 | ON  | 518    | NIL | 339.73 |
| 4135 | psYma | ?_SMA1339      | CDS | 733113 | 733604 + | 30 | 30 | NIL | 298.85 | ON  | 323.99 | NIL | 310.37 | ON  | 400.83 | NIL | 292.29 |
| 4136 | psYma | ?_SMA1341      | CDS | 733694 | 734653 + | 30 | 30 | ON  | 315.72 | NIL | 282.86 | NIL | 290.08 | ON  | 347.2  | NIL | 308.61 |
| 4137 | psYma | ?_SMA1344      | CDS | 734850 | 735959 + | 30 | 30 | ON  | 326.62 | ON  | 318.73 | NIL | 346.9  | ON  | 359.33 | NIL | 342.46 |
| 4138 | psYma | ?_SMA1345      | CDS | 735959 | 737035 + | 30 | 30 | ON  | 342.72 | NIL | 301.38 | NIL | 325.64 | NIL | 326.88 | NIL | 295.36 |
| 4139 | psYma | ?_SMA1347      | CDS | 738130 | 738130 - | 30 | 30 | NIL | 285.65 | NIL | 302.91 | NIL | 421.16 | ON  | 295.27 | NIL | 280.3  |
| 4140 | psYma | ?_SMA1349      | CDS | 738144 | 738836 - | 30 | 30 | ON  | 360.79 | ON  | 357.68 | ON  | 403.09 | NIL | 403.09 | NIL | 312.17 |
| 4141 | psYma | ?_SMA1351      | CDS | 740047 | 740047 - | 30 | 30 | ON  | 309.64 | ON  | 349.67 | NIL | 332.82 | ON  | 376.35 | NIL | 330.12 |
| 4142 | psYma | ?_SMA1353      | CDS | 740057 | 740944 - | 30 | 30 | NIL | 308.56 | ON  | 451.19 | NIL | 364.64 | ON  | 606.34 | NIL | 353.93 |
| 4143 | psYma | ?_SMA1354      | CDS | 741213 | 742109 + | 30 | 30 | NIL | 304.76 | ON  | 412.59 | NIL | 356.74 | ON  | 495.47 | NIL | 356.27 |
| 4144 | psYma | ?_SMA1355      | CDS | 742432 | 743280 - | 30 | 30 | ON  | 358.25 | ON  | 378.01 | NIL | 358.95 | ON  | 423.08 | ON  | 392.83 |
| 4145 | psYma | ?_SMA1356      | CDS | 743344 | 744546 - | 62 | 0  | ON  | 444.87 | ON  | 412.05 | NIL | 304.43 | ON  | 434.08 | NIL | 348.21 |
| 4146 | psYma | ?_SMA1358      | CDS | 745763 | 745799 + | 30 | 30 | NIL | 261.31 | NIL | 310.36 | NIL | 304.43 | NIL | 292.38 | NIL | 289.25 |
| 4147 | psYma | ?_SMA1361      | CDS | 745799 | 747599 - | 30 | 30 | NIL | 237.27 | NIL | 262.9  | NIL | 322.49 | NIL | 268.91 | NIL | 289.25 |
| 4148 | psYma | ?_SMA1362      | CDS | 747619 | 747599 - | 30 | 30 | NIL | 294.89 | ON  | 332.36 | NIL | 312.82 | NIL | 302.66 | NIL | 304.58 |
| 4149 | psYma | ?_SMA1363      | CDS | 747596 | 748684 - | 30 | 30 | NIL | 243.99 | NIL | 242.8  | NIL | 236.77 | NIL | 245.86 | NIL | 311.92 |
| 4150 | psYma | ?_SMA1364      | CDS | 748748 | 749668 - | 30 | 30 | ON  | 253.43 | NIL | 288.04 | NIL | 322.54 | NIL | 298.48 | NIL | 361.87 |
| 4151 | psYma | ?_SMA1365      | CDS | 750652 | 751026 - | 30 | 30 | NIL | 301    | NIL | 299.62 | NIL | 314.82 | NIL | 318.61 | NIL | 337.56 |
| 4152 | psYma | ?_SMA1367      | CDS | 751181 | 751855 - | 30 | 30 | ON  | 328.18 | ON  | 373.4  | ON  | 398    | ON  | 377.67 | NIL | 385.41 |
| 4153 | psYma | ?_SMA1368      | CDS | 751947 | 752672 - | 30 | 30 | ON  | 373.54 | ON  | 364.75 | ON  | 385.23 | ON  | 403.61 | NIL | 364.41 |
| 4154 | psYma | ?_SMA1370      | CDS | 752672 | 753655 - | 31 | 31 | ON  | 311.19 | ON  | 335.33 | NIL | 379.06 | ON  | 339.85 | NIL | 404.92 |
| 4155 | psYma | ?_SMA1371      | CDS | 753652 | 754632 - | 30 | 30 | ON  | 345.29 | ON  | 379.06 | ON  | 378.25 | ON  | 404.06 | NIL | 408.92 |
| 4156 | psYma | ?_SMA1373      | CDS | 754635 | 755593 - | 30 | 30 | ON  | 360.21 | NIL | 310.61 | NIL | 337.53 | NIL | 318.86 | NIL | 352.47 |
| 4157 | psYma | ?_SMA1375      | CDS | 755594 | 756523 - | 30 | 30 | ON  | 378.87 | ON  | 391.33 | ON  | 382.65 | ON  | 374.02 | NIL | 368.61 |
| 4158 | psYma | ?_SMA1377      | CDS | 756593 | 758041 - | 30 | 30 | NIL | 304.99 | NIL | 305.14 | NIL | 357.04 | ON  | 321.91 | NIL | 345.58 |
| 4159 | psYma | ?_SMA1379      | CDS | 758107 | 759522 - | 30 | 30 | NIL | 356.06 | ON  | 381.61 | NIL | 357.04 | ON  | 365.93 | NIL | 354.03 |
| 4160 | psYma | ?_SMA1381      | CDS | 759497 | 761166 - | 39 | 39 | ON  | 337.47 | ON  | 393.81 | NIL | 353.75 | ON  | 381.61 | NIL | 360.94 |
| 4161 | psYma | ?_SMA1382      | CDS | 761267 | 762625 - | 30 | 30 | ON  | 379.67 | ON  | 430.64 | ON  | 412.94 | ON  | 408.58 | ON  | 453.81 |
| 4162 | psYma | ?_SMA1386      | CDS | 762866 | 764224 - | 30 | 30 | ON  | 328.27 | ON  | 335.29 | ON  | 457.41 | ON  | 369.22 | ON  | 390.48 |
| 4163 | psYma | ?_SMA1387      | CDS | 764198 | 765172 + | 30 | 30 | NIL | 302.4  | ON  | 370.33 | NIL | 285.59 | NIL | 283.1  | NIL | 311.02 |
| 4164 | psYma | efB2: SMA1389  | CDS | 764198 | 765057 - | 30 | 30 | ON  | 735.81 | ON  | 541.26 | ON  | 442.3  | ON  | 518.38 | ON  | 384.96 |
| 4165 | psYma | efB2: SMA1391  | CDS | 766128 | 766923 - | 30 | 0  | ON  | 1568.4 | ON  | 817.93 | ON  | 541.91 | ON  | 685.42 | ON  | 482.63 |
| 4166 | psYma | ?_SMA1394      | CDS | 766940 | 767797 - | 30 | 30 | ON  | 363.81 | NIL | 300.09 | ON  | 455.18 | ON  | 457.29 | NIL | 351.38 |

|      |       |                 |     |        |          |    |    |     |        |     |        |     |        |     |        |     |        |
|------|-------|-----------------|-----|--------|----------|----|----|-----|--------|-----|--------|-----|--------|-----|--------|-----|--------|
| 4167 | ψSymA | ?_SMA1397       | CDS | 767799 | 768947 - | 30 | 30 | ON  | 331.05 | ON  | 380.71 | ON  | 383.76 | ON  | 389.99 | ON  | 379.53 |
| 4168 | ψSymA | ?_SMA1398       | CDS | 768956 | 769735 - | 30 | 30 | ON  | 315.14 | NIL | 313.66 | NIL | 315.78 | NIL | 310.6  | NIL | 319.31 |
| 4169 | ψSymA | ?_SMA1400       | CDS | 770872 | 770802 - | 30 | 30 | ON  | 344.51 | ON  | 326.39 | ON  | 456.79 | ON  | 366.28 | ON  | 437.47 |
| 4170 | ψSymA | ?_SMA1403       | CDS | 771034 | 772050 + | 30 | 30 | ON  | 359.95 | NIL | 302.93 | ON  | 418.94 | ON  | 388.28 | NIL | 361.06 |
| 4171 | ψSymA | ttu03_SMA1406   | CDS | 772165 | 773424 - | 30 | 30 | ON  | 359.92 | ON  | 402.61 | ON  | 518.85 | ON  | 426.38 | ON  | 408.87 |
| 4172 | ψSymA | ?_SMA1408       | CDS | 773437 | 774207 - | 31 | 31 | ON  | 365.82 | ON  | 332.56 | ON  | 471.23 | ON  | 454.79 | ON  | 440.65 |
| 4173 | ψSymA | ?_SMA1409       | CDS | 774204 | 77575 -  | 30 | 30 | ON  | 378.37 | ON  | 340.98 | NIL | 347.46 | ON  | 355.79 | NIL | 334.58 |
| 4174 | ψSymA | ?_SMA1410       | CDS | 775888 | 776721 + | 30 | 30 | ON  | 333.84 | NIL | 324.03 | NIL | 330.55 | NIL | 340.57 | NIL | 344.75 |
| 4175 | ψSymA | ?_SMA1413       | CDS | 777118 | 777393 - | 30 | 29 | NIL | 302.58 | ON  | 371.38 | NIL | 319.41 | NIL | 334.4  | NIL | 318.39 |
| 4176 | ψSymA | ?_SMA1414       | CDS | 779216 | 779216 - | 30 | 30 | ON  | 385.67 | ON  | 327.25 | ON  | 422.13 | ON  | 365.7  | NIL | 372.15 |
| 4177 | ψSymA | ?_SMA1415       | CDS | 779216 | 780712 - | 30 | 30 | ON  | 386.77 | ON  | 378.19 | ON  | 444.6  | ON  | 388.69 | NIL | 388.85 |
| 4178 | ψSymA | ?_SMA1417       | CDS | 780875 | 781900 - | 30 | 30 | ON  | 338.24 | ON  | 322.17 | ON  | 461.72 | ON  | 385.95 | NIL | 339.23 |
| 4179 | ψSymA | ?_SMA1418       | CDS | 781919 | 782860 - | 30 | 30 | ON  | 327.83 | NIL | 327.79 | NIL | 321.47 | NIL | 333.69 | NIL | 327.61 |
| 4180 | ψSymA | ?_SMA1421       | CDS | 782868 | 784379 - | 30 | 30 | ON  | 324.11 | NIL | 303.43 | NIL | 324.81 | NIL | 301.42 | NIL | 311.7  |
| 4181 | ψSymA | ?_SMA1424       | CDS | 784390 | 785364 - | 30 | 30 | NIL | 282.36 | NIL | 304.05 | NIL | 316.81 | NIL | 283.4  | NIL | 292.22 |
| 4182 | ψSymA | ?_SMA1427       | CDS | 786798 | 786548 - | 30 | 30 | NIL | 287.5  | NIL | 293.8  | NIL | 281.06 | NIL | 279.66 | NIL | 300.37 |
| 4183 | ψSymA | ?_SMA1428       | CDS | 786798 | 787457 + | 30 | 30 | ON  | 380.54 | ON  | 337.02 | NIL | 301.27 | NIL | 312.72 | NIL | 288.69 |
| 4184 | ψSymA | ?_SMA1430       | CDS | 787459 | 788526 - | 31 | 31 | ON  | 342.47 | ON  | 392.12 | ON  | 371.53 | ON  | 352.44 | NIL | 330.21 |
| 4186 | ψSymA | ?_SMA1431       | CDS | 788523 | 789041 - | 30 | 30 | ON  | 328.22 | ON  | 360.93 | ON  | 440.8  | ON  | 366.06 | ON  | 414.68 |
| 4187 | ψSymA | ?_SMA1434       | CDS | 790863 | 790866 - | 44 | 23 | ON  | 307.24 | ON  | 330.64 | NIL | 364.86 | ON  | 346.47 | NIL | 345.63 |
| 4188 | ψSymA | ?_SMA1435       | CDS | 791783 | 791780 - | 30 | 30 | NIL | 359.93 | ON  | 360.86 | NIL | 331.43 | ON  | 366.94 | NIL | 318.63 |
| 4189 | ψSymA | ?_SMA1437       | CDS | 792785 | 792707 - | 30 | 30 | NIL | 296.64 | ON  | 318.69 | NIL | 332.21 | ON  | 382.49 | NIL | 362.68 |
| 4190 | ψSymA | ?_SMA1440       | CDS | 794293 | 794293 - | 30 | 30 | NIL | 342.44 | ON  | 435.29 | NIL | 338.78 | ON  | 529.57 | NIL | 351.55 |
| 4191 | ψSymA | ?_SMA1442       | CDS | 795334 | 795273 - | 30 | 30 | ON  | 332.99 | ON  | 483.77 | ON  | 338.78 | ON  | 566.59 | ON  | 391.89 |
| 4192 | ψSymA | ?_SMA1445       | CDS | 796518 | 797222 + | 30 | 30 | ON  | 360.7  | NIL | 312.92 | ON  | 431.32 | ON  | 455.33 | ON  | 395.08 |
| 4193 | ψSymA | ?_SMA1447       | CDS | 797393 | 798745 - | 30 | 30 | ON  | 349.16 | ON  | 350.95 | ON  | 299.15 | ON  | 309.57 | ON  | 297.67 |
| 4194 | ψSymA | ?_SMA1450       | CDS | 799195 | 800385 - | 30 | 30 | ON  | 331.74 | ON  | 359.04 | ON  | 383.96 | ON  | 344.61 | NIL | 356.58 |
| 4195 | ψSymA | ?_SMA1452       | CDS | 800410 | 801177 - | 30 | 30 | ON  | 372.4  | NIL | 293.31 | NIL | 286.07 | NIL | 306.87 | NIL | 319.4  |
| 4196 | ψSymA | ?_SMA1454       | CDS | 801272 | 802342 + | 31 | 31 | ON  | 359.54 | ON  | 364.33 | NIL | 268.07 | NIL | 369.84 | NIL | 345.49 |
| 4197 | ψSymA | ?_SMA1455       | CDS | 802324 | 802842 - | 30 | 30 | ON  | 335.05 | NIL | 307.65 | NIL | 261.01 | NIL | 389.84 | NIL | 345.49 |
| 4198 | ψSymA | ?_SMA1456       | CDS | 802839 | 803228 - | 30 | 30 | ON  | 333.01 | NIL | 288.33 | NIL | 299.19 | NIL | 299.43 | NIL | 299.43 |
| 4199 | ψSymA | ?_SMA1459       | CDS | 803336 | 804340 - | 31 | 31 | NIL | 311.53 | NIL | 316.98 | NIL | 300.55 | NIL | 310.31 | NIL | 322.45 |
| 4200 | ψSymA | ?_SMA1461       | CDS | 804337 | 805461 - | 30 | 30 | NIL | 304.29 | ON  | 346.53 | NIL | 317.61 | NIL | 309.07 | NIL | 324.99 |
| 4201 | ψSymA | ?_SMA1462       | CDS | 805388 | 806478 - | 30 | 30 | NIL | 368.62 | ON  | 400.14 | NIL | 377.24 | ON  | 375.52 | ON  | 387.35 |
| 4202 | ψSymA | ?_SMA1465       | CDS | 806502 | 807257 - | 31 | 31 | ON  | 332.84 | ON  | 396.32 | NIL | 351.55 | ON  | 354.53 | NIL | 372.81 |
| 4203 | ψSymA | ?_SMA1466       | CDS | 807254 | 808369 - | 30 | 30 | NIL | 310.84 | NIL | 286.95 | NIL | 366.27 | NIL | 319.38 | NIL | 316.72 |
| 4204 | ψSymA | ?_SMA1467       | CDS | 808366 | 809028 - | 30 | 30 | ON  | 335.74 | ON  | 332.81 | NIL | 331.69 | NIL | 339.58 | NIL | 327.01 |
| 4205 | ψSymA | ?_SMA1471       | CDS | 809179 | 809859 - | 30 | 30 | NIL | 301.6  | NIL | 277.8  | NIL | 320.74 | NIL | 289.3  | NIL | 302.03 |
| 4206 | ψSymA | ?_SMA1473       | CDS | 809859 | 811163 - | 30 | 30 | NIL | 273.94 | NIL | 273.94 | NIL | 287.11 | NIL | 299.4  | NIL | 287.61 |
| 4207 | ψSymA | ?_SMA1476       | CDS | 811255 | 812247 - | 30 | 30 | NIL | 267.11 | NIL | 265.95 | NIL | 287.11 | NIL | 289.3  | NIL | 291.21 |
| 4208 | ψSymA | ?_SMA1478       | CDS | 812255 | 813790 - | 30 | 30 | NIL | 306.41 | ON  | 340.24 | NIL | 309.31 | NIL | 309.31 | NIL | 312.52 |
| 4209 | ψSymA | ?_SMA1480       | CDS | 813928 | 814902 + | 30 | 30 | ON  | 321.88 | NIL | 308.13 | NIL | 296.89 | NIL | 311.25 | NIL | 351.26 |
| 4210 | ψSymA | ?_SMA1483       | CDS | 815138 | 817558 + | 30 | 30 | NIL | 307.51 | NIL | 290.19 | NIL | 310.05 | NIL | 311.25 | NIL | 304.72 |
| 4211 | ψSymA | ?_SMA1485       | CDS | 817966 | 819108 - | 30 | 30 | NIL | 411.34 | ON  | 419.05 | ON  | 418.37 | ON  | 422.21 | NIL | 378.79 |
| 4212 | ψSymA | ?_SMA1487       | CDS | 819484 | 819852 - | 31 | 31 | NIL | 255.36 | NIL | 233.86 | NIL | 288.94 | NIL | 270.22 | NIL | 275.9  |
| 4213 | ψSymA | ?_SMA1488       | CDS | 819849 | 822092 - | 30 | 30 | ON  | 399.23 | ON  | 407.8  | ON  | 436.96 | ON  | 433.87 | ON  | 452.82 |
| 4214 | ψSymA | ?_SMA1491       | CDS | 822089 | 822637 - | 30 | 30 | NIL | 256.81 | NIL | 280.14 | NIL | 318.58 | NIL | 327.38 | NIL | 307.69 |
| 4215 | ψSymA | ?_SMA1493       | CDS | 822713 | 823636 + | 30 | 30 | NIL | 308.05 | NIL | 304.15 | NIL | 326.07 | NIL | 330.34 | NIL | 336.25 |
| 4216 | ψSymA | ?_SMA1494       | CDS | 823723 | 824163 + | 30 | 30 | NIL | 268.5  | NIL | 275.84 | NIL | 261.67 | NIL | 253.77 | NIL | 272.37 |
| 4217 | ψSymA | ?_SMA1495       | CDS | 824592 | 825704 + | 30 | 30 | ON  | 384.23 | NIL | 318.3  | ON  | 428.49 | ON  | 387.18 | NIL | 358.73 |
| 4218 | ψSymA | gnt12-1_SMA1497 | CDS | 825906 | 826553 - | 30 | 30 | ON  | 363.52 | NIL | 295.03 | NIL | 303.92 | NIL | 311.49 | NIL | 301.68 |
| 4219 | ψSymA | ?_SMA1500       | CDS | 826564 | 828330 - | 30 | 30 | ON  | 315.87 | ON  | 355.59 | NIL | 339.19 | NIL | 322.26 | NIL | 313.55 |
| 4220 | ψSymA | ?_SMA1501       | CDS | 828355 | 829269 - | 30 | 30 | ON  | 322.53 | NIL | 296.44 | NIL | 334.58 | NIL | 312.74 | NIL | 305.02 |
| 4221 | ψSymA | ?_SMA1503       | CDS | 829300 | 830166 - | 30 | 30 | ON  | 326.01 | ON  | 305.14 | ON  | 366.22 | ON  | 338.58 | ON  | 318.86 |
| 4222 | ψSymA | ?_SMA1505       | CDS | 830383 | 831168 + | 30 | 30 | ON  | 418.47 | ON  | 377.48 | NIL | 318.77 | NIL | 333.16 | NIL | 318.86 |
| 4223 | ψSymA | ?_SMA1507       | CDS | 831222 | 832316 + | 30 | 30 | ON  | 454.67 | ON  | 371.73 | NIL | 347.14 | ON  | 366.45 | NIL | 324.05 |
| 4224 | ψSymA | ?_SMA1509       | CDS | 832401 | 833936 + | 30 | 30 | ON  | 397.08 | ON  | 383.01 | NIL | 362.09 | ON  | 368.73 | NIL | 347.51 |
| 4225 | ψSymA | ?_SMA1513       | CDS | 833962 | 834984 + | 30 | 30 | NIL | 295.01 | ON  | 335.76 | NIL | 296.61 | NIL | 287.94 | NIL | 272.56 |
| 4226 | ψSymA | ?_SMA1514       | CDS | 834984 | 835904 + | 30 | 30 | NIL | 363    | ON  | 357.23 | NIL | 383.16 | NIL | 304.62 | NIL | 298.8  |
| 4227 | ψSymA | ?_SMA1515       | CDS | 835950 | 836495   | 30 | 30 | NIL | 261.62 | NIL | 278.57 | NIL | 284.54 | NIL | 289.23 | NIL | 306.35 |
| 4228 | ψSymA | nuoH2_SMA1516   | CDS | 836495 | 837481 + | 30 | 30 | NIL | 273.87 | NIL | 309.72 | NIL | 293.46 | NIL | 288.43 | NIL | 318.99 |
| 4229 | ψSymA | ?_SMA1519       | CDS | 837551 | 838171 + | 30 | 30 | NIL | 304.34 | NIL | 309.72 | NIL | 349.02 | NIL | 304.32 | NIL | 318.99 |
| 4230 | ψSymA | ?_SMA1521       | CDS | 838161 | 838601 + | 30 | 30 | NIL | 315.29 | ON  | 333.6  | NIL | 281.28 | NIL | 299.25 | NIL | 311.85 |
| 4231 | ψSymA | nuoG2_SMA1523   | CDS | 838689 | 841250 - | 30 | 30 | NIL | 291.13 | NIL | 300.69 | NIL | 340.33 | ON  | 304.14 | NIL | 317.85 |
| 4232 | ψSymA | nuoE2_SMA1525   | CDS | 841280 | 842545 - | 31 | 30 | NIL | 385.38 | ON  | 340.33 | NIL | 356.93 | ON  | 347.45 | ON  | 383.22 |
| 4233 | ψSymA | nuoD2_SMA1526   | CDS | 842549 | 843055 - | 30 | 30 | NIL | 309.29 | NIL | 313.74 | NIL | 342.32 | NIL | 310.39 | NIL | 331.48 |
| 4234 | ψSymA | nuoD2_SMA1529   | CDS | 843074 | 844288 - | 30 | 30 | NIL | 276.25 | NIL | 307.9  | NIL | 274.09 | NIL | 279.28 | NIL | 319.58 |
| 4235 | ψSymA | nuoC2_SMA1531   | CDS | 844305 | 844853 - | 31 | 31 | ON  | 325.85 | ON  | 348.12 | NIL | 324.51 | ON  | 344.36 | NIL | 349.61 |
| 4236 | ψSymA | nuoB2_SMA1532   | CDS | 844850 | 845853 - | 30 | 30 | ON  | 346.44 | ON  | 370.68 | ON  | 388    | ON  | 353.58 | NIL | 353.29 |
| 4237 | ψSymA | nuoA2_SMA1533   | CDS | 845341 | 845706 - | 30 | 30 | NIL | 278.46 | ON  | 355.35 | NIL | 248.74 | NIL | 296.78 | NIL | 278.2  |
| 4238 | ψSymA | nuoN2_SMA1535   | CDS | 845922 | 847361 - | 30 | 30 | NIL | 266.3  | NIL | 277.84 | NIL | 280.97 | NIL | 284.97 | NIL | 326.18 |

|      |       |               |     |        |          |    |    |    |     |        |     |        |     |        |     |        |
|------|-------|---------------|-----|--------|----------|----|----|----|-----|--------|-----|--------|-----|--------|-----|--------|
| 4239 | ψSymA | nuoM2:SMa1536 | CDS | 847358 | 848833 - | 30 | 30 | 30 | ON  | 323.13 | NIL | 341.3  | NIL | 332.73 | NIL | 339.81 |
| 4240 | ψSymA | ?_SMa1538     | CDS | 844840 | 850528 - | 30 | 30 | 30 | ON  | 295.61 | ON  | 312.38 | NIL | 275.28 | NIL | 318.3  |
| 4241 | ψSymA | ?_SMa1539     | CDS | 850566 | 850880 + | 31 | 31 | 31 | NIL | 333.77 | NIL | 366.24 | ON  | 404.86 | NIL | 333.28 |
| 4242 | ψSymA | ?_SMa1541     | CDS | 850844 | 852807 - | 31 | 31 | 31 | ON  | 340.42 | ON  | 312.2  | NIL | 310.17 | NIL | 292.7  |
| 4243 | ψSymA | nuoK2:SMa1544 | CDS | 852812 | 852814 - | 30 | 30 | 30 | NIL | 258.73 | NIL | 306.15 | NIL | 312.64 | NIL | 326.38 |
| 4244 | ψSymA | ?_SMa1545     | CDS | 852814 | 853150 - | 30 | 30 | 30 | NIL | 261.52 | NIL | 243.55 | NIL | 312.64 | NIL | 274.87 |
| 4245 | ψSymA | ?_SMa1547     | CDS | 853409 | 854080 + | 30 | 30 | 30 | NIL | 422.18 | ON  | 365.8  | ON  | 377.13 | NIL | 340.06 |
| 4246 | ψSymA | ?_SMa1548     | CDS | 854282 | 857437 + | 30 | 30 | 30 | NIL | 279.13 | NIL | 337.39 | NIL | 329.81 | NIL | 278.54 |
| 4247 | ψSymA | ?_SMa1550     | CDS | 857437 | 858311 + | 30 | 30 | 30 | NIL | 321.63 | NIL | 335.8  | NIL | 327.68 | NIL | 326.65 |
| 4248 | ψSymA | ?_SMa1552     | CDS | 858465 | 859826 + | 30 | 30 | 30 | ON  | 321.63 | NIL | 334.83 | NIL | 324.42 | ON  | 332.46 |
| 4249 | ψSymA | ?_SMa1554     | CDS | 859823 | 860491 + | 31 | 31 | 31 | ON  | 368.42 | NIL | 368.07 | NIL | 445.78 | ON  | 384.45 |
| 4250 | ψSymA | ?_SMa1556     | CDS | 860424 | 862109 + | 31 | 31 | 31 | NIL | 299.53 | NIL | 317.82 | ON  | 355.93 | ON  | 326.62 |
| 4251 | ψSymA | ?_SMa1558     | CDS | 862096 | 864222 + | 30 | 30 | 30 | NIL | 309.69 | NIL | 304.53 | ON  | 343.11 | NIL | 355.9  |
| 4252 | ψSymA | cheB2:SMa1561 | CDS | 864232 | 865296 + | 30 | 30 | 30 | NIL | 327.42 | ON  | 380.07 | ON  | 362.67 | NIL | 344.87 |
| 4253 | ψSymA | ?_SMa1562     | CDS | 865351 | 866199 - | 30 | 30 | 30 | NIL | 310.92 | ON  | 351.4  | ON  | 372.15 | NIL | 361.3  |
| 4254 | ψSymA | ?_SMa1564     | CDS | 866426 | 867327 - | 30 | 30 | 30 | NIL | 318.9  | ON  | 361.46 | NIL | 375.39 | NIL | 310.91 |
| 4255 | ψSymA | cpaF2:SMa1568 | CDS | 867356 | 868849 - | 30 | 30 | 30 | NIL | 278.56 | NIL | 306.22 | NIL | 342.07 | NIL | 289.56 |
| 4256 | ψSymA | pilA2:SMa1570 | CDS | 868893 | 869063 - | 30 | 30 | 30 | ON  | 372.63 | NIL | 355.08 | NIL | 374.03 | NIL | 345.61 |
| 4257 | ψSymA | ?_SMa1572     | CDS | 869408 | 869833 - | 31 | 31 | 31 | ON  | 336.27 | NIL | 372.64 | ON  | 380.15 | ON  | 338.7  |
| 4258 | ψSymA | cpaE2:SMa1573 | CDS | 869830 | 871590 - | 30 | 30 | 30 | ON  | 339.69 | ON  | 338.56 | ON  | 380.08 | ON  | 439.23 |
| 4259 | ψSymA | cpaB2:SMa1576 | CDS | 871597 | 872388 - | 30 | 30 | 30 | NIL | 398.63 | ON  | 338.73 | NIL | 313.83 | NIL | 376.55 |
| 4260 | ψSymA | cpaA2:SMa1578 | CDS | 872431 | 872943 - | 30 | 30 | 30 | NIL | 300.65 | NIL | 320.94 | NIL | 301.88 | NIL | 326.84 |
| 4261 | ψSymA | ?_SMa1579     | CDS | 873155 | 874498 + | 30 | 30 | 30 | ON  | 335.38 | ON  | 336.83 | NIL | 369.28 | NIL | 342.74 |
| 4262 | ψSymA | ?_SMa1580     | CDS | 874611 | 875123 + | 30 | 30 | 30 | NIL | 319.66 | ON  | 337.8  | NIL | 343.57 | ON  | 377.72 |
| 4263 | ψSymA | ?_SMa1582     | CDS | 875222 | 876520 - | 30 | 30 | 30 | NIL | 292.03 | NIL | 276.45 | NIL | 301.95 | NIL | 358.57 |
| 4264 | ψSymA | cpaF5:SMa1583 | CDS | 876769 | 878532 - | 30 | 30 | 30 | NIL | 343.4  | ON  | 335.41 | ON  | 376.33 | NIL | 370.43 |
| 4265 | ψSymA | ?_SMa1585     | CDS | 878659 | 879859   | 30 | 30 | 30 | ON  | 438.18 | ON  | 340.55 | ON  | 340.12 | NIL | 345.01 |
| 4266 | ψSymA | sybB2:SMa1586 | CDS | 879859 | 880314 - | 30 | 30 | 30 | ON  | 809.2  | ON  | 989.23 | ON  | 981.83 | ON  | 519.95 |
| 4267 | ψSymA | gpcC:SMa1587  | CDS | 880620 | 882017 + | 30 | 30 | 30 | ON  | 320.62 | ON  | 362.49 | NIL | 299.72 | NIL | 304.33 |
| 4268 | ψSymA | ?_SMa1589     | CDS | 883252 | 883770 - | 30 | 30 | 30 | NIL | 237.73 | NIL | 265.27 | NIL | 233.45 | NIL | 289.47 |
| 4269 | ψSymA | ?_SMa1591     | CDS | 884133 | 884712 - | 32 | 32 | 32 | NIL | 271.77 | NIL | 324.96 | NIL | 312.75 | NIL | 340.63 |
| 4270 | ψSymA | ?_SMa1592     | CDS | 884758 | 888821 - | 36 | 36 | 36 | NIL | 295.44 | ON  | 301.61 | NIL | 372.75 | NIL | 399.2  |
| 4271 | ψSymA | ?_SMa1593     | CDS | 887977 | 888190 - | 41 | 41 | 41 | NIL | 325.4  | ON  | 321.29 | ON  | 408.39 | ON  | 393.52 |
| 4272 | ψSymA | ?_SMa1594     | CDS | 889137 | 889793 + | 30 | 30 | 30 | NIL | 286.78 | NIL | 243.78 | ON  | 345.74 | NIL | 363.02 |
| 4273 | ψSymA | ?_SMa1595     | CDS | 890034 | 890477 + | 30 | 30 | 30 | NIL | 214.51 | ON  | 240.84 | NIL | 321.5  | NIL | 306.53 |
| 4274 | ψSymA | ?_SMa1597     | CDS | 890927 | 891709 - | 30 | 30 | 30 | NIL | 306.47 | ON  | 341.13 | ON  | 395.17 | NIL | 362.92 |
| 4275 | ψSymA | ?_SMa1600     | CDS | 891838 | 893592 + | 30 | 30 | 30 | NIL | 295.19 | NIL | 291.52 | NIL | 376.27 | NIL | 347.3  |
| 4276 | ψSymA | ?_SMa1602     | CDS | 893872 | 894780 - | 30 | 30 | 30 | ON  | 333.61 | NIL | 332.23 | NIL | 366.77 | NIL | 330.88 |
| 4277 | ψSymA | ?_SMa1604     | CDS | 894831 | 895922 + | 30 | 30 | 30 | NIL | 308.74 | NIL | 304.91 | NIL | 316.19 | NIL | 311.9  |
| 4278 | ψSymA | ?_SMa1606     | CDS | 895919 | 896966 + | 30 | 30 | 30 | NIL | 281.76 | NIL | 348.75 | ON  | 382.1  | NIL | 335.09 |
| 4279 | ψSymA | ?_SMa1608     | CDS | 897347 | 897643 - | 31 | 0  | 0  | NIL | 223.05 | NIL | 275.07 | NIL | 249.53 | NIL | 252.64 |
| 4280 | ψSymA | ?_SMa1610     | CDS | 897643 | 897904 - | 32 | 0  | 0  | NIL | 249.2  | NIL | 235.16 | NIL | 267.6  | NIL | 306.57 |
| 4281 | ψSymA | ?_SMa1612     | CDS | 898016 | 899281 - | 44 | 1  | 0  | ON  | 384.67 | ON  | 325.91 | NIL | 462.62 | ON  | 372.78 |
| 4282 | ψSymA | ?_SMa1613     | CDS | 899330 | 899647 - | 30 | 0  | 0  | ON  | 358.21 | ON  | 403.06 | ON  | 340.13 | ON  | 446.92 |
| 4283 | ψSymA | ?_SMa1614     | CDS | 899769 | 900599 - | 73 | 0  | 0  | ON  | 526.67 | ON  | 417.94 | ON  | 359.3  | NIL | 306.87 |
| 4284 | ψSymA | ?_SMa1615     | CDS | 900596 | 900988 - | 44 | 0  | 0  | ON  | 501.25 | ON  | 411.21 | ON  | 440.54 | ON  | 400.86 |
| 4285 | ψSymA | ?_SMa1617     | CDS | 901120 | 902349 + | 30 | 0  | 0  | NIL | 274.93 | NIL | 299.48 | NIL | 310.43 | NIL | 288.19 |
| 4286 | ψSymA | ?_SMa1619     | CDS | 902343 | 903257 + | 30 | 0  | 0  | NIL | 318.32 | NIL | 313.5  | NIL | 320.3  | NIL | 303.66 |
| 4287 | ψSymA | ?_SMa1620     | CDS | 903254 | 904243 + | 30 | 0  | 0  | NIL | 265.24 | NIL | 289.85 | NIL | 262.8  | NIL | 277.28 |
| 4288 | ψSymA | ?_SMa1623     | CDS | 904393 | 904767 - | 43 | 0  | 0  | NIL | 313.42 | ON  | 310.67 | NIL | 323.62 | NIL | 310.37 |
| 4289 | ψSymA | ?_SMa1625     | CDS | 904985 | 905908 - | 30 | 30 | 30 | NIL | 274.75 | NIL | 305.24 | NIL | 257.71 | NIL | 317.64 |
| 4290 | ψSymA | ?_SMa1626     | CDS | 906613 | 906672 + | 30 | 30 | 30 | ON  | 348.04 | ON  | 433.08 | NIL | 360.57 | NIL | 345.96 |
| 4291 | ψSymA | ?_SMa1629     | CDS | 906813 | 907592 - | 30 | 30 | 30 | NIL | 315.95 | NIL | 300.16 | NIL | 297.99 | NIL | 297.59 |
| 4292 | ψSymA | ?_SMa1630     | CDS | 907592 | 907939 - | 30 | 30 | 30 | NIL | 274.39 | NIL | 270.43 | NIL | 274.93 | NIL | 291.53 |
| 4293 | ψSymA | ?_SMa1632     | CDS | 907961 | 908914 + | 31 | 30 | 30 | NIL | 294.72 | NIL | 267.48 | NIL | 320.29 | NIL | 289.7  |
| 4294 | ψSymA | ?_SMa1635     | CDS | 910181 | 910639 - | 30 | 30 | 30 | NIL | 252.57 | NIL | 312.83 | NIL | 285.49 | NIL | 318.5  |
| 4295 | ψSymA | ?_SMa1636     | CDS | 911789 | 912589 + | 54 | 0  | 0  | NIL | 378.26 | ON  | 389.4  | ON  | 328.05 | NIL | 331.85 |
| 4296 | ψSymA | ?_SMa1637     | CDS | 912620 | 913126 + | 43 | 2  | 0  | NIL | 377.82 | ON  | 397.73 | ON  | 376.46 | ON  | 370.19 |
| 4297 | ψSymA | ?_SMa1638     | CDS | 913315 | 913578 - | 30 | 30 | 30 | NIL | 280.35 | NIL | 316.15 | NIL | 393.63 | ON  | 346.51 |
| 4298 | ψSymA | ?_SMa1639     | CDS | 913809 | 914000 + | 30 | 30 | 30 | NIL | 301.72 | NIL | 312.12 | NIL | 311.77 | NIL | 345.19 |
| 4299 | ψSymA | ?_SMa1641     | CDS | 914013 | 915335 + | 31 | 31 | 31 | ON  | 379.01 | NIL | 317.37 | NIL | 356.79 | NIL | 363.78 |
| 4300 | ψSymA | ?_SMa1643     | CDS | 915317 | 915670 + | 30 | 30 | 30 | NIL | 301.7  | NIL | 278.94 | NIL | 347.34 | ON  | 327.26 |
| 4301 | ψSymA | ?_SMa1644     | CDS | 915768 | 916487 + | 30 | 30 | 30 | NIL | 306.93 | NIL | 334.03 | NIL | 296.56 | NIL | 298.14 |
| 4302 | ψSymA | ?_SMa1646     | CDS | 917367 | 918479 - | 34 | 34 | 34 | ON  | 306.93 | NIL | 321.88 | NIL | 311.22 | NIL | 348.9  |
| 4303 | ψSymA | ?_SMa1647     | CDS | 918386 | 919381 - | 33 | 33 | 33 | ON  | 318.73 | ON  | 331.58 | NIL | 335.36 | NIL | 375.94 |
| 4304 | ψSymA | ?_SMa1649     | CDS | 919371 | 920282 - | 31 | 31 | 31 | NIL | 307.16 | NIL | 310.2  | NIL | 348.18 | NIL | 322.64 |
| 4305 | ψSymA | ?_SMa1650     | CDS | 920273 | 921208 - | 30 | 30 | 30 | NIL | 296.04 | ON  | 339.95 | NIL | 290.41 | NIL | 308.73 |
| 4306 | ψSymA | ?_SMa1651     | CDS | 921222 | 922799 - | 30 | 30 | 30 | NIL | 300.69 | ON  | 333.49 | ON  | 369.87 | NIL | 344.13 |
| 4307 | ψSymA | ?_SMa1652     | CDS | 923650 | 924350 + | 30 | 30 | 30 | NIL | 256.87 | NIL | 264.87 | NIL | 272.55 | NIL | 312.89 |
| 4308 | ψSymA | ?_SMa1653     | CDS | 923853 | 924578 + | 30 | 30 | 30 | NIL | 296.14 | NIL | 292.28 | NIL | 267.43 | NIL | 299.25 |
| 4309 | ψSymA | ?_SMa1654     | CDS | 924741 | 925439 + | 30 | 30 | 30 | NIL | 303.64 | NIL | 300.88 | NIL | 295.2  | NIL | 276.61 |
| 4310 | ψSymA | ?_SMa1657     | CDS | 925848 | 926255 - | 30 | 30 | 30 | NIL | 238.58 | NIL | 282.78 | NIL | 258.59 | NIL | 281.11 |

|      |       |               |     |         |           |    |    |     |        |     |         |     |        |     |         |     |         |
|------|-------|---------------|-----|---------|-----------|----|----|-----|--------|-----|---------|-----|--------|-----|---------|-----|---------|
| 4311 | ψSymA | 7_SMA1658     | CD5 | 926260  | 926625 -  | 30 | 30 | NIL | 270.88 | NIL | 262.56  | NIL | 350.47 | NIL | 329.11  | NIL | 369.47  |
| 4312 | ψSymA | 7_SMA1660     | CD5 | 926871  | 927455 -  | 30 | 30 | NIL | 312.32 | ON  | 337.37  | ON  | 388.93 | ON  | 392.5   | NIL | 392.97  |
| 4313 | ψSymA | 7_SMA1662     | CD5 | 927892  | 931026 -  | 31 | 31 | NIL | 290.98 | NIL | 302.84  | NIL | 293.19 | NIL | 285.42  | NIL | 324.41  |
| 4314 | ψSymA | 7_SMA1664     | CD5 | 931023  | 932189 -  | 30 | 30 | NIL | 322.47 | ON  | 362.13  | ON  | 395.42 | ON  | 402.55  | ON  | 387.21  |
| 4315 | ψSymA | 7_SMA1666     | CD5 | 932526  | 933005 -  | 30 | 30 | NIL | 276.63 | NIL | 282.54  | NIL | 356.64 | NIL | 293.17  | NIL | 337.73  |
| 4316 | ψSymA | arcD1_SMA1667 | CD5 | 933295  | 934722 +  | 30 | 30 | NIL | 303.91 | NIL | 278.15  | NIL | 354.96 | NIL | 308.82  | NIL | 347.21  |
| 4317 | ψSymA | arcD2_SMA1668 | CD5 | 935142  | 936563 +  | 30 | 30 | NIL | 344.8  | ON  | 328.09  | NIL | 369.56 | NIL | 305.05  | NIL | 288.03  |
| 4318 | ψSymA | arc2_SMA1670  | CD5 | 936579  | 937838 +  | 30 | 30 | NIL | 296.22 | ON  | 344.18  | NIL | 297.81 | NIL | 323.64  | NIL | 336.63  |
| 4319 | ψSymA | 7_SMA1672     | CD5 | 938282  | 938896 +  | 30 | 30 | NIL | 262.5  | NIL | 302.86  | NIL | 339.84 | NIL | 310.4   | NIL | 306.77  |
| 4320 | ψSymA | 7_SMA1674     | CD5 | 938993  | 939953 +  | 30 | 30 | NIL | 270.62 | NIL | 276.53  | NIL | 254.97 | NIL | 269.29  | NIL | 286.35  |
| 4321 | ψSymA | 7_SMA1675     | CD5 | 939303  | 939934 +  | 30 | 30 | NIL | 292.65 | NIL | 302.87  | NIL | 317.66 | NIL | 294.15  | NIL | 334.53  |
| 4322 | ψSymA | 7_SMA1676     | CD5 | 940014  | 941114 -  | 30 | 30 | NIL | 270.62 | ON  | 306.18  | NIL | 317.66 | NIL | 266.08  | NIL | 274.06  |
| 4323 | ψSymA | 7_SMA1677     | CD5 | 941157  | 942599 -  | 30 | 30 | NIL | 348.89 | ON  | 321.66  | ON  | 380.93 | ON  | 368.6   | NIL | 340.89  |
| 4324 | ψSymA | 7_SMA1678     | CD5 | 942871  | 943152 -  | 30 | 30 | NIL | 298.21 | ON  | 331.95  | NIL | 334.38 | NIL | 319.2   | NIL | 327.89  |
| 4325 | ψSymA | 7_SMA1680     | CD5 | 943416  | 945809 -  | 30 | 30 | NIL | 314.08 | NIL | 315.95  | NIL | 326.09 | NIL | 329.72  | NIL | 307.95  |
| 4326 | ψSymA | 7_SMA1682     | CD5 | 945870  | 9465870   | 30 | 30 | NIL | 319.76 | ON  | 357.58  | ON  | 388.1  | ON  | 351.24  | NIL | 330.82  |
| 4327 | ψSymA | 7_SMA1683     | CD5 | 946866  | 948633 -  | 30 | 30 | NIL | 269.82 | NIL | 313.69  | NIL | 301.17 | NIL | 290.29  | NIL | 290.34  |
| 4328 | ψSymA | 7_SMA1684     | CD5 | 950846  | 950853 +  | 30 | 30 | NIL | 312.04 | NIL | 321.07  | NIL | 370.61 | NIL | 356.34  | NIL | 356.31  |
| 4329 | ψSymA | 7_SMA1686     | CD5 | 950846  | 951487 +  | 30 | 30 | NIL | 299.7  | NIL | 312.72  | NIL | 327.9  | NIL | 329.33  | NIL | 347.28  |
| 4330 | ψSymA | 7_SMA1688     | CD5 | 951569  | 951985 +  | 30 | 30 | NIL | 247.96 | NIL | 270.13  | NIL | 304.39 | NIL | 273.97  | NIL | 265.64  |
| 4331 | ψSymA | 7_SMA1691     | CD5 | 952528  | 953982 +  | 30 | 30 | NIL | 318.1  | ON  | 334.54  | NIL | 318.69 | NIL | 306.18  | NIL | 281.87  |
| 4332 | ψSymA | 7_SMA1693     | CD5 | 954329  | 954910 -  | 30 | 30 | NIL | 290.32 | NIL | 284.13  | NIL | 297.35 | NIL | 308.81  | NIL | 293.75  |
| 4333 | ψSymA | 7_SMA1694     | CD5 | 954873  | 955352 +  | 30 | 30 | NIL | 254.09 | NIL | 268.81  | NIL | 283.3  | NIL | 266.24  | ON  | 271.83  |
| 4334 | ψSymA | 7_SMA1696     | CD5 | 955590  | 956786 +  | 30 | 26 | ON  | 353.12 | ON  | 374.72  | NIL | 357.05 | ON  | 358.65  | ON  | 386.87  |
| 4335 | ψSymA | 7_SMA1697     | CD5 | 957068  | 957667 -  | 30 | 30 | ON  | 510.03 | ON  | 444.54  | ON  | 382.67 | ON  | 506.95  | ON  | 440.66  |
| 4336 | ψSymA | syfB_SMA1698  | CD5 | 957928  | 958383 -  | 30 | 27 | ON  | 727.69 | NIL | 1133.1  | ON  | 536.2  | ON  | 878.77  | ON  | 589.24  |
| 4337 | ψSymA | 7_SMA1699     | CD5 | 958586  | 958963 +  | 30 | 30 | NIL | 279.95 | NIL | 291.15  | NIL | 333.92 | NIL | 300.51  | NIL | 340.66  |
| 4338 | ψSymA | 7_SMA1700     | CD5 | 958960  | 959149 +  | 30 | 30 | NIL | 247.09 | NIL | 240.03  | NIL | 317.69 | NIL | 314.27  | NIL | 314.07  |
| 4339 | ψSymA | 7_SMA1702     | CD5 | 959316  | 959909 -  | 30 | 30 | ON  | 378.75 | ON  | 382.48  | ON  | 376.24 | ON  | 383.89  | NIL | 333.92  |
| 4340 | ψSymA | 7_SMA1704     | CD5 | 960493  | 961848 -  | 30 | 30 | NIL | 268.43 | NIL | 262.87  | NIL | 284.29 | NIL | 258.5   | NIL | 326.44  |
| 4341 | ψSymA | 7_SMA1705     | CD5 | 961799  | 962215 +  | 30 | 30 | NIL | 301.11 | ON  | 367.3   | NIL | 361.3  | NIL | 357.44  | NIL | 309.35  |
| 4342 | ψSymA | 7_SMA1706     | CD5 | 962821  | 963234 -  | 32 | 32 | NIL | 208.16 | ON  | 325.46  | NIL | 310.42 | NIL | 290.69  | NIL | 324.25  |
| 4343 | ψSymA | 7_SMA1709     | CD5 | 963225  | 963623 -  | 30 | 30 | NIL | 373.71 | NIL | 271.82  | NIL | 307.08 | NIL | 294.54  | NIL | 301.42  |
| 4344 | ψSymA | arg12_SMA1711 | CD5 | 963447  | 964540 +  | 30 | 30 | ON  | 314.99 | ON  | 333.98  | NIL | 359.01 | ON  | 351.17  | NIL | 330.35  |
| 4345 | ψSymA | adeC3_SMA1715 | CD5 | 965405  | 967192 -  | 30 | 30 | ON  | 323.61 | ON  | 332.32  | NIL | 342.92 | NIL | 332.17  | NIL | 344.45  |
| 4346 | ψSymA | 7_SMA1717     | CD5 | 967265  | 968692 -  | 30 | 30 | ON  | 313.66 | NIL | 316.52  | NIL | 336.44 | NIL | 301.15  | NIL | 332.65  |
| 4347 | ψSymA | adeC4_SMA1718 | CD5 | 968713  | 970515 -  | 30 | 30 | ON  | 344.25 | ON  | 356.05  | NIL | 359.77 | ON  | 357.41  | NIL | 338.07  |
| 4348 | ψSymA | 7_SMA1720     | CD5 | 970632  | 971576 +  | 30 | 30 | NIL | 324.6  | ON  | 331.97  | ON  | 393.96 | ON  | 346.92  | NIL | 346.47  |
| 4349 | ψSymA | 7_SMA1723     | CD5 | 971687  | 972025 -  | 30 | 30 | NIL | 306.9  | NIL | 283.6   | NIL | 352.91 | NIL | 328.22  | NIL | 343.52  |
| 4350 | ψSymA | 7_SMA1724     | CD5 | 972145  | 972927 -  | 30 | 30 | NIL | 285.96 | NIL | 322.21  | NIL | 308.04 | NIL | 317.61  | NIL | 317.08  |
| 4351 | ψSymA | 7_SMA1725     | CD5 | 973132  | 973770 +  | 30 | 30 | NIL | 284.14 | NIL | 275.93  | NIL | 287.28 | NIL | 305.54  | NIL | 304.62  |
| 4352 | ψSymA | 7_SMA1726     | CD5 | 973814  | 974570 -  | 30 | 30 | ON  | 326.41 | NIL | 313.34  | NIL | 329.52 | NIL | 316.14  | NIL | 300.75  |
| 4353 | ψSymA | 7_SMA1727     | CD5 | 974626  | 975516 +  | 30 | 30 | NIL | 344.61 | NIL | 339.02  | NIL | 356.15 | ON  | 347.33  | NIL | 314.14  |
| 4354 | ψSymA | 7_SMA1729     | CD5 | 975705  | 976706 -  | 30 | 30 | NIL | 293.83 | NIL | 339.02  | NIL | 374.64 | NIL | 347.33  | NIL | 316.63  |
| 4355 | ψSymA | betB2_SMA1731 | CD5 | 976900  | 978369 -  | 30 | 30 | NIL | 307.02 | NIL | 301.92  | NIL | 310.47 | NIL | 306.34  | NIL | 342.27  |
| 4356 | ψSymA | 7_SMA1732     | CD5 | 978389  | 978742 -  | 30 | 30 | NIL | 282.72 | NIL | 307.84  | ON  | 398.43 | NIL | 361.01  | NIL | 364.25  |
| 4357 | ψSymA | 7_SMA1734     | CD5 | 978754  | 979854 -  | 30 | 30 | NIL | 275.13 | NIL | 254.46  | NIL | 305.49 | NIL | 310.62  | NIL | 295.69  |
| 4358 | ψSymA | 7_SMA1735     | CD5 | 980276  | 981340 +  | 30 | 30 | NIL | 280.18 | NIL | 290.46  | NIL | 317.09 | NIL | 308.13  | NIL | 305.43  |
| 4359 | ψSymA | 7_SMA1736     | CD5 | 981384  | 982265 -  | 30 | 30 | NIL | 267.55 | NIL | 283.46  | NIL | 279.98 | NIL | 279.29  | NIL | 308.1   |
| 4360 | ψSymA | 7_SMA1737     | CD5 | 983270  | 983528 +  | 30 | 30 | NIL | 246.26 | NIL | 278.39  | NIL | 259.13 | NIL | 245.91  | NIL | 310.09  |
| 4361 | ψSymA | 7_SMA1740     | CD5 | 983996  | 985066 -  | 31 | 31 | ON  | 313.13 | ON  | 339.9   | NIL | 381.55 | NIL | 326.02  | NIL | 329.04  |
| 4362 | ψSymA | 7_SMA1741     | CD5 | 985063  | 985905 -  | 30 | 30 | ON  | 315.28 | ON  | 359.92  | NIL | 358.13 | NIL | 319.96  | NIL | 330.79  |
| 4363 | ψSymA | 7_SMA1742     | CD5 | 985905  | 986492 -  | 30 | 30 | NIL | 279.64 | NIL | 304.22  | NIL | 298.08 | NIL | 271.95  | NIL | 281.61  |
| 4364 | ψSymA | 7_SMA1745     | CD5 | 986493  | 988039 -  | 31 | 31 | NIL | 275.19 | NIL | 286.58  | NIL | 270.23 | NIL | 250.76  | NIL | 288.84  |
| 4365 | ψSymA | 7_SMA1746     | CD5 | 987982  | 989013 -  | 30 | 30 | NIL | 285.79 | ON  | 336.7   | ON  | 413.15 | NIL | 338.29  | NIL | 339.7   |
| 4366 | ψSymA | 7_SMA1747     | CD5 | 989276  | 991420 +  | 30 | 30 | NIL | 252.83 | NIL | 285.18  | NIL | 285.73 | NIL | 265.92  | NIL | 298.54  |
| 4367 | ψSymA | 7_SMA1749     | CD5 | 991460  | 992359 -  | 30 | 30 | NIL | 257.83 | NIL | 263.06  | NIL | 319.97 | NIL | 286.41  | NIL | 276.77  |
| 4368 | ψSymA | 7_SMA1750     | CD5 | 992825  | 994291 +  | 30 | 30 | ON  | 371.6  | ON  | 791.38  | ON  | 439.09 | NIL | 399.13  | NIL | 336.69  |
| 4369 | ψSymA | 7_SMA1751     | CD5 | 994674  | 995456 -  | 30 | 30 | ON  | 331.24 | ON  | 350.64  | NIL | 311.13 | NIL | 312.52  | NIL | 306.49  |
| 4370 | ψSymA | 7_SMA1753     | CD5 | 995460  | 996512 -  | 30 | 30 | ON  | 314.38 | ON  | 402.34  | NIL | 327.16 | ON  | 340.22  | NIL | 309.21  |
| 4371 | ψSymA | 7_SMA1754     | CD5 | 996635  | 997714 -  | 30 | 30 | ON  | 317.76 | ON  | 371.22  | NIL | 375.74 | ON  | 345.82  | NIL | 301.25  |
| 4372 | ψSymA | 7_SMA1755     | CD5 | 997813  | 998865 -  | 30 | 30 | ON  | 420.62 | ON  | 107.422 | ON  | 510.65 | ON  | 938.71  | NIL | 562.85  |
| 4373 | ψSymA | 7_SMA1757     | CD5 | 999071  | 999841 -  | 30 | 30 | ON  | 339.22 | ON  | 482     | ON  | 413.14 | ON  | 451.1   | NIL | 366.73  |
| 4374 | ψSymA | 7_SMA1759     | CD5 | 999887  | 1000567 - | 30 | 30 | ON  | 320.51 | ON  | 373.6   | NIL | 348.27 | ON  | 388.47  | NIL | 347.62  |
| 4375 | ψSymA | 7_SMA1760     | CD5 | 1000541 | 1001788 + | 30 | 30 | ON  | 435.92 | ON  | 774.79  | ON  | 529.72 | ON  | 681.17  | NIL | 613.5   |
| 4376 | ψSymA | 7_SMA1761     | CD5 | 100191  | 1003107 + | 30 | 30 | ON  | 407.49 | ON  | 790.93  | ON  | 550.57 | ON  | 657.8   | NIL | 625.09  |
| 4377 | ψSymA | 7_SMA1765     | CD5 | 1003486 | 1003971 - | 30 | 30 | ON  | 348.99 | ON  | 748.74  | ON  | 412.2  | ON  | 656.81  | ON  | 485.22  |
| 4378 | ψSymA | 7_SMA1766     | CD5 | 1003499 | 1004250 - | 30 | 30 | ON  | 748.43 | ON  | 2612.47 | ON  | 823.55 | ON  | 1339.87 | ON  | 1172.47 |
| 4379 | ψSymA | 7_SMA1767     | CD5 | 1005037 | 1005204 + | 30 | 30 | ON  | 333.51 | ON  | 435.17  | ON  | 443.93 | ON  | 358.77  | NIL | 369.49  |
| 4380 | ψSymA | 7_SMA1769     | CD5 | 1005521 | 1005829 + | 30 | 30 | ON  | 313.17 | ON  | 325.64  | NIL | 333.93 | ON  | 343.69  | NIL | 325.48  |
| 4381 | ψSymA | 7_SMA1770     | CD5 | 1005927 | 1006100 - | 31 | 25 | ON  | 356.22 | ON  | 365.02  | ON  | 539.9  | ON  | 480.75  | NIL | 423.01  |
| 4382 | ψSymA | 7_SMA1773     | CD5 | 1006360 | 1006545 + | 30 | 30 | ON  | 440.53 | ON  | 415.97  | ON  | 693.56 | ON  | 592.11  | ON  | 521.03  |

|      |       |                |     |         |           |    |    |     |        |     |        |     |        |     |        |     |        |
|------|-------|----------------|-----|---------|-----------|----|----|-----|--------|-----|--------|-----|--------|-----|--------|-----|--------|
| 4383 | psYma | ?_SMA1776      | CDs | 1006786 | 1008156 + | 30 | 30 | NIL | 311.01 | NIL | 298.01 | NIL | 330.7  | NIL | 294.83 | NIL | 270.1  |
| 4384 | psYma | ?_SMA1779      | CDs | 1008864 | 1009310 - | 30 | 30 | NIL | 319.88 | NIL | 293.23 | NIL | 371.41 | ON  | 353.14 | ON  | 400.78 |
| 4385 | psYma | ?_SMA1780      | CDs | 1009319 | 1009742 - | 30 | 30 | NIL | 274.88 | NIL | 259.01 | NIL | 253.21 | NIL | 253.1  | NIL | 294.38 |
| 4386 | psYma | ?_SMA1782      | CDs | 1009854 | 1010747 + | 30 | 30 | ON  | 335.55 | NIL | 317.55 | ON  | 400.76 | ON  | 351.01 | NIL | 337.38 |
| 4387 | psYma | ?_SMA1783      | CDs | 1010873 | 1011049 + | 30 | 30 | ON  | 378.89 | ON  | 498.03 | NIL | 301.03 | NIL | 315.33 | NIL | 338.04 |
| 4388 | psYma | ?_SMA1784      | CDs | 1011129 | 1011473 - | 30 | 30 | NIL | 262.41 | NIL | 302.8  | NIL | 372.53 | NIL | 307.56 | NIL | 325.52 |
| 4390 | psYma | ?_SMA1787      | CDs | 1011513 | 1011839 - | 30 | 30 | NIL | 240.46 | NIL | 271.52 | NIL | 232.51 | NIL | 240.59 | NIL | 286.44 |
| 4390 | psYma | ?_SMA1789      | CDs | 1012465 | 1015821 + | 30 | 30 | NIL | 309.7  | NIL | 286.44 | NIL | 334.48 | ON  | 345.88 | NIL | 340.58 |
| 4392 | psYma | ?_SMA1791      | CDs | 1016196 | 1016546 - | 30 | 30 | ON  | 266.42 | NIL | 312.11 | NIL | 335.59 | NIL | 306.43 | NIL | 277.33 |
| 4393 | psYma | ?_SMA1793      | CDs | 1016962 | 1017362 + | 30 | 30 | NIL | 309.73 | ON  | 440.68 | NIL | 372.38 | ON  | 431.92 | NIL | 352.06 |
| 4394 | psYma | ?_SMA1797      | CDs | 1018587 | 1018913 + | 30 | 30 | ON  | 331.46 | ON  | 326.45 | NIL | 341.44 | ON  | 398.32 | NIL | 353.46 |
| 4395 | psYma | kup2: SMA1798  | CDs | 1019529 | 1021430 + | 49 | 28 | ON  | 306.73 | NIL | 299.28 | ON  | 370.77 | ON  | 344.96 | NIL | 320.26 |
| 4396 | psYma | ?_SMA1801      | CDs | 1020270 | 1022543 - | 48 | 0  | ON  | 358.59 | ON  | 323.34 | NIL | 283.42 | ON  | 339.27 | NIL | 310.62 |
| 4397 | psYma | ?_SMA1803      | CDs | 1022639 | 1023898 - | 33 | 0  | ON  | 421.91 | ON  | 301.64 | ON  | 309.67 | ON  | 301.71 | ON  | 308.86 |
| 4398 | psYma | ?_SMA1806      | CDs | 1024493 | 1024900 - | 41 | 0  | NIL | 967.09 | NIL | 511.59 | ON  | 476.16 | ON  | 653.14 | ON  | 465.21 |
| 4399 | psYma | ?_SMA1808      | CDs | 1025491 | 1025400 + | 30 | 30 | NIL | 278.62 | NIL | 286.7  | NIL | 275.21 | NIL | 311.51 | NIL | 330.61 |
| 4400 | psYma | ?_SMA1809      | CDs | 1026068 | 1026050 - | 30 | 30 | ON  | 355.83 | ON  | 384.41 | NIL | 350.29 | ON  | 354.36 | ON  | 377.21 |
| 4401 | psYma | ?_SMA1811      | CDs | 1026068 | 1026775 - | 30 | 30 | ON  | 291.11 | NIL | 330.16 | NIL | 283.58 | NIL | 354.36 | ON  | 320.71 |
| 4402 | psYma | ?_SMA1814      | CDs | 1027980 | 1029758 - | 30 | 30 | ON  | 333.05 | ON  | 329.53 | NIL | 330    | NIL | 294.02 | NIL | 310.96 |
| 4403 | psYma | ?_SMA1817      | CDs | 1029569 | 1029672 - | 31 | 31 | ON  | 365.24 | ON  | 320.79 | NIL | 354.91 | NIL | 329.18 | NIL | 343.49 |
| 4404 | psYma | ?_SMA1820      | CDs | 1030041 | 1030027 - | 30 | 30 | NIL | 342.54 | ON  | 364.56 | NIL | 331.9  | NIL | 303.69 | NIL | 311.14 |
| 4405 | psYma | ?_SMA1821      | CDs | 1032026 | 1032026 - | 30 | 30 | ON  | 310.87 | NIL | 313.96 | NIL | 286.02 | NIL | 299.68 | NIL | 313.94 |
| 4406 | psYma | ?_SMA1822      | CDs | 1032402 | 1033112 - | 30 | 30 | ON  | 314.03 | NIL | 310.41 | NIL | 349.14 | NIL | 331.48 | ON  | 393.95 |
| 4407 | psYma | ?_SMA1825      | CDs | 1033278 | 1034372 - | 30 | 30 | NIL | 382.92 | NIL | 368.87 | NIL | 343.1  | ON  | 350.96 | NIL | 341.53 |
| 4408 | psYma | ?_SMA1828      | CDs | 1034405 | 1035313 - | 30 | 30 | NIL | 303.92 | NIL | 297.54 | NIL | 284.86 | NIL | 298.9  | NIL | 321.8  |
| 4409 | psYma | ?_SMA1825      | CDs | 1035458 | 1036366 - | 30 | 30 | NIL | 276.76 | NIL | 348.43 | NIL | 277.45 | NIL | 281.36 | NIL | 285.3  |
| 4410 | psYma | ?_SMA1828      | CDs | 1037514 | 1037514 - | 30 | 30 | NIL | 298.08 | ON  | 286.44 | NIL | 297.37 | NIL | 291.12 | NIL | 271.61 |
| 4411 | psYma | ?_SMA1831      | CDs | 1038347 | 1038949 + | 30 | 30 | NIL | 300.94 | NIL | 286.44 | NIL | 315.21 | NIL | 295.5  | NIL | 301.95 |
| 4412 | psYma | ?_SMA1832      | CDs | 1039013 | 1039465 - | 30 | 30 | NIL | 280.88 | NIL | 312.86 | NIL | 366.93 | NIL | 295.11 | NIL | 305.98 |
| 4413 | psYma | ?_SMA1833      | CDs | 1039508 | 1040893 + | 30 | 30 | ON  | 266.69 | NIL | 270.39 | NIL | 306.17 | NIL | 272.88 | NIL | 286.43 |
| 4414 | psYma | ?_SMA1835      | CDs | 1040893 | 1041928 - | 30 | 30 | ON  | 334.11 | ON  | 344.75 | ON  | 411.41 | NIL | 415.13 | NIL | 355.65 |
| 4415 | psYma | arge: SMA1836  | CDs | 1041083 | 1041302   | 31 | 31 | ON  | 299.4  | ON  | 335.9  | NIL | 336.65 | ON  | 312.05 | NIL | 324.89 |
| 4416 | psYma | ?_SMA1838      | CDs | 1043381 | 1044361 + | 30 | 30 | ON  | 370.8  | ON  | 362.06 | NIL | 369.73 | NIL | 312.05 | NIL | 363.79 |
| 4417 | psYma | ?_SMA1840      | CDs | 1044351 | 1044804 + | 30 | 30 | ON  | 359.24 | ON  | 346.39 | NIL | 349.31 | ON  | 364.94 | NIL | 318.26 |
| 4418 | psYma | ?_SMA1844      | CDs | 1044600 | 1046600 + | 30 | 30 | ON  | 288.96 | ON  | 331.7  | NIL | 333.2  | NIL | 306.58 | NIL | 307.05 |
| 4419 | psYma | ?_SMA1846      | CDs | 1045137 | 1047653 + | 30 | 30 | ON  | 371.95 | ON  | 408.54 | ON  | 406.37 | ON  | 406.74 | ON  | 412.71 |
| 4420 | psYma | gabdS: SMA1848 | CDs | 1046610 | 1049142 + | 30 | 30 | NIL | 381.32 | NIL | 363.58 | NIL | 358.13 | ON  | 374.69 | ON  | 406.19 |
| 4421 | psYma | ?_SMA1850      | CDs | 1047688 | 1049642 + | 30 | 30 | NIL | 301.56 | NIL | 282.69 | NIL | 342.86 | NIL | 302.84 | NIL | 277.8  |
| 4422 | psYma | ?_SMA1851      | CDs | 1050700 | 1050683 - | 30 | 30 | NIL | 282.69 | NIL | 288.03 | NIL | 365.13 | NIL | 316.63 | NIL | 353.13 |
| 4423 | psYma | ?_SMA1853      | CDs | 1051670 | 1051368 - | 30 | 30 | NIL | 272.79 | NIL | 282.07 | NIL | 325.21 | NIL | 294.96 | NIL | 316.94 |
| 4424 | psYma | ?_SMA1855      | CDs | 1052536 | 1053912 + | 30 | 30 | NIL | 275.9  | NIL | 269.19 | NIL | 243.79 | NIL | 266.16 | NIL | 289.41 |
| 4426 | psYma | ?_SMA1857      | CDs | 1054005 | 1054865 + | 30 | 30 | NIL | 310.91 | ON  | 366.53 | NIL | 335.6  | ON  | 364.6  | NIL | 360.5  |
| 4426 | psYma | ?_SMA1860      | CDs | 1054935 | 1056545 + | 30 | 30 | NIL | 296.35 | NIL | 291.2  | NIL | 346.12 | NIL | 319.67 | ON  | 319.33 |
| 4427 | psYma | ?_SMA1862      | CDs | 1056337 | 1057587 + | 30 | 30 | NIL | 294.45 | ON  | 346.42 | NIL | 338.13 | ON  | 312.36 | NIL | 391.66 |
| 4428 | psYma | ?_SMA1863      | CDs | 1057584 | 1058447 + | 30 | 30 | ON  | 289.97 | NIL | 292.07 | NIL | 330.34 | ON  | 334.06 | NIL | 348.71 |
| 4429 | psYma | ?_SMA1864      | CDs | 1058447 | 1060102 + | 30 | 30 | NIL | 406.81 | ON  | 391.69 | NIL | 304.14 | NIL | 340.99 | NIL | 311.76 |
| 4430 | psYma | ?_SMA1867      | CDs | 1060211 | 1062248 + | 30 | 30 | ON  | 314.59 | ON  | 325.35 | NIL | 337.31 | NIL | 339.77 | NIL | 309.86 |
| 4431 | psYma | ?_SMA1869      | CDs | 1060923 | 1062248 + | 30 | 30 | NIL | 290.26 | NIL | 303.12 | NIL | 360.3  | NIL | 324.91 | NIL | 336.72 |
| 4432 | psYma | ?_SMA1871      | CDs | 1062447 | 1063475 + | 30 | 30 | ON  | 331.71 | ON  | 333.76 | NIL | 347.13 | NIL | 335.62 | NIL | 286.5  |
| 4433 | psYma | ?_SMA1872      | CDs | 1064481 | 1064452 + | 30 | 30 | NIL | 233.17 | NIL | 250.9  | NIL | 276.43 | NIL | 251.14 | NIL | 323.92 |
| 4434 | psYma | ?_SMA1874      | CDs | 1064742 | 1065083 + | 30 | 30 | NIL | 303.17 | NIL | 299.4  | NIL | 354.96 | ON  | 347.54 | NIL | 321.92 |
| 4435 | psYma | ?_SMA1875      | CDs | 1065694 | 1067211 - | 30 | 30 | NIL | 259.16 | NIL | 247.16 | NIL | 320.21 | NIL | 301.5  | NIL | 338.51 |
| 4436 | psYma | ?_SMA1878      | CDs | 1068776 | 1068031 - | 30 | 28 | NIL | 285.01 | NIL | 255.77 | NIL | 319.61 | NIL | 299.19 | NIL | 364.27 |
| 4437 | psYma | ?_SMA1881      | CDs | 1068558 | 1069151 + | 30 | 30 | NIL | 300.69 | NIL | 297.47 | NIL | 357.71 | NIL | 298.51 | NIL | 310.81 |
| 4438 | psYma | ?_SMA1882      | CDs | 1069239 | 1069898 - | 30 | 30 | NIL | 259.53 | NIL | 277.89 | NIL | 355.81 | NIL | 310.42 | NIL | 369.49 |
| 4439 | psYma | ?_SMA1884      | CDs | 1069938 | 1072955 - | 30 | 30 | NIL | 311.87 | ON  | 364.74 | NIL | 332.41 | ON  | 338.33 | NIL | 328.78 |
| 4440 | psYma | ?_SMA1885      | CDs | 1071305 | 1074193 - | 30 | 30 | NIL | 305.91 | NIL | 321.41 | ON  | 336.45 | ON  | 352.33 | NIL | 331.13 |
| 4441 | psYma | ?_SMA1887      | CDs | 1074349 | 1074193 - | 30 | 30 | NIL | 316.02 | NIL | 295.74 | ON  | 417.72 | NIL | 334.75 | NIL | 345.96 |
| 4442 | psYma | ?_SMA1890      | CDs | 1074958 | 1075602 + | 40 | 40 | ON  | 274.34 | NIL | 291.86 | NIL | 329.34 | NIL | 334.75 | NIL | 345.96 |
| 4443 | psYma | ?_SMA1891      | CDs | 1075520 | 1075816 + | 30 | 30 | NIL | 275.66 | NIL | 291.86 | NIL | 365.93 | NIL | 282.73 | NIL | 298.59 |
| 4444 | psYma | ?_SMA1893      | CDs | 1075895 | 1076770 + | 30 | 30 | NIL | 277.01 | NIL | 291.38 | NIL | 313.1  | NIL | 282.73 | NIL | 293.87 |
| 4445 | psYma | ?_SMA1894      | CDs | 1076880 | 1077323 + | 30 | 30 | ON  | 315.13 | NIL | 325.58 | NIL | 348.57 | NIL | 312.11 | NIL | 328.53 |
| 4446 | psYma | ?_SMA1896      | CDs | 1077324 | 1077830 + | 30 | 30 | ON  | 365.31 | ON  | 420.53 | ON  | 395.05 | ON  | 374.54 | ON  | 380.58 |
| 4447 | psYma | ?_SMA1898      | CDs | 1079036 | 1079262 + | 30 | 30 | NIL | 323.1  | NIL | 322.51 | NIL | 359.22 | ON  | 345.77 | NIL | 316.19 |
| 4448 | psYma | ?_SMA1900      | CDs | 1079608 | 1080145 + | 30 | 30 | NIL | 273.24 | NIL | 315.71 | NIL | 326.45 | ON  | 338.6  | NIL | 341.79 |
| 4449 | psYma | ?_SMA1902      | CDs | 1080265 | 1080747 + | 30 | 30 | NIL | 291.06 | NIL | 307.19 | NIL | 298.16 | NIL | 303.1  | NIL | 273.3  |
| 4450 | psYma | ?_SMA1903      | CDs | 1080814 | 1081800 + | 30 | 30 | NIL | 344.31 | ON  | 358    | NIL | 362.83 | ON  | 351.69 | NIL | 330.4  |
| 4451 | psYma | mncB: SMA1905  | CDs | 1080814 | 1081800 + | 30 | 30 | NIL | 291.75 | NIL | 302.39 | NIL | 372.49 | ON  | 359.1  | NIL | 358.2  |
| 4452 | psYma | ?_SMA1907      | CDs | 1082806 | 1085190 - | 30 | 30 | NIL | 284.05 | NIL | 291.91 | NIL | 304.51 | NIL | 326.56 | NIL | 333.17 |
| 4453 | psYma | ?_SMA1910      | CDs | 1085810 | 1087539 - | 30 | 30 | NIL | 286.22 | NIL | 283.57 | NIL | 313.41 | NIL | 284.87 | NIL | 303.04 |
| 4454 | psYma | ?_SMA1913      | CDs | 1087240 | 1087570 + | 30 | 30 | NIL | 290.21 | NIL | 307.97 | NIL | 317.26 | ON  | 336.35 | NIL | 315.24 |
|      |       |                |     | 1087957 | 1089270 + | 30 | 30 | ON  | 327.45 | NIL | 315.39 | NIL | 314.32 | NIL | 304.72 | NIL | 274.81 |

|      |       |                 |     |         |           |    |    |     |        |     |        |     |        |     |        |     |        |
|------|-------|-----------------|-----|---------|-----------|----|----|-----|--------|-----|--------|-----|--------|-----|--------|-----|--------|
| 4455 | ψSymA | ψ_SMA1916       | CDS | 1089430 | 1091208 - | 30 | 30 | ON  | 325.7  | ON  | 352.95 | ON  | 378.4  | ON  | 345.31 | NIL | 351.51 |
| 4456 | ψSymA | ψ_SMA1917       | CDS | 1091545 | 1091971 - | 30 | 30 | NIL | 285.11 | NIL | 325.72 | ON  | 325.72 | ON  | 285.03 | NIL | 337.34 |
| 4457 | ψSymA | ψ_SMA1918       | CDS | 1092279 | 1092560 + | 31 | 31 | NIL | 243.2  | NIL | 255.13 | NIL | 200.81 | NIL | 242.58 | NIL | 246.24 |
| 4458 | ψSymA | ψ_SMA1919       | CDS | 1092557 | 1092790 + | 30 | 30 | NIL | 270.52 | NIL | 320.67 | NIL | 320.86 | NIL | 279.46 | NIL | 287.45 |
| 4459 | ψSymA | ψ_SMA1921       | CDS | 1093853 | 1093883 - | 30 | 30 | NIL | 300.03 | ON  | 426.63 | NIL | 281.33 | NIL | 320.86 | NIL | 267.95 |
| 4460 | ψSymA | ψ_SMA1924       | CDS | 1095016 | 1095690 - | 30 | 30 | ON  | 369.86 | ON  | 393.96 | NIL | 342.8  | ON  | 392.83 | NIL | 368.12 |
| 4461 | ψSymA | ψ_SMA1927       | CDS | 1096027 | 1097019 + | 30 | 28 | ON  | 408.93 | ON  | 437.27 | ON  | 479.34 | NIL | 479.34 | NIL | 388.82 |
| 4462 | ψSymA | ψ_SMA1929       | CDS | 1097612 | 1098121 - | 30 | 30 | ON  | 381.04 | ON  | 375.48 | NIL | 303.33 | NIL | 294.46 | NIL | 336.72 |
| 4463 | ψSymA | ψ_SMA1933       | CDS | 1098786 | 1099480 - | 30 | 30 | NIL | 257.89 | NIL | 313.68 | NIL | 295.9  | NIL | 290.84 | NIL | 331.77 |
| 4464 | ψSymA | withA3: SMA1935 | CDS | 1099582 | 1100220 + | 30 | 30 | ON  | 345.64 | ON  | 345.19 | ON  | 497.61 | ON  | 439.93 | ON  | 406.66 |
| 4465 | ψSymA | ψ_SMA1937       | CDS | 1100217 | 1101455 + | 30 | 30 | ON  | 353.12 | ON  | 375.53 | ON  | 396.51 | NIL | 328.87 | NIL | 326.64 |
| 4466 | ψSymA | ψ_SMA1939       | CDS | 1101631 | 1103166 - | 30 | 30 | NIL | 287.91 | NIL | 317.15 | NIL | 337.67 | NIL | 306.86 | NIL | 303.43 |
| 4467 | ψSymA | ψ_SMA1943       | CDS | 1103762 | 1104167 - | 30 | 30 | NIL | 357.84 | ON  | 372.67 | NIL | 337.54 | ON  | 350.91 | NIL | 326.44 |
| 4468 | ψSymA | ψ_SMA1945       | CDS | 1105040 | 1105040 + | 30 | 30 | NIL | 295.26 | NIL | 299.13 | NIL | 311.15 | NIL | 275.82 | NIL | 311.94 |
| 4469 | ψSymA | ψ_SMA1948       | CDS | 1105615 | 1105631 + | 30 | 30 | NIL | 270.6  | NIL | 267.45 | NIL | 283.45 | NIL | 315.25 | NIL | 315.25 |
| 4470 | ψSymA | ψ_SMA1951       | CDS | 1107529 | 1107562 - | 30 | 30 | NIL | 273.32 | NIL | 297.94 | NIL | 310.96 | NIL | 309.2  | NIL | 300.89 |
| 4471 | ψSymA | ψ_SMA1952       | CDS | 1107687 | 1108532 - | 30 | 30 | ON  | 380.91 | ON  | 327.05 | NIL | 311.76 | NIL | 336.76 | NIL | 297.58 |
| 4472 | ψSymA | ψ_SMA1953       | CDS | 1108753 | 1109757 - | 30 | 30 | ON  | 320.13 | NIL | 308.16 | NIL | 367.18 | ON  | 348.44 | NIL | 364.82 |
| 4473 | ψSymA | ψ_SMA1954       | CDS | 1109860 | 1110843 + | 30 | 30 | ON  | 320.94 | ON  | 323.74 | NIL | 340.73 | ON  | 337.07 | NIL | 322.06 |
| 4474 | ψSymA | ψ_SMA1956       | CDS | 1111325 | 1112257 - | 30 | 30 | ON  | 343.23 | ON  | 323.35 | ON  | 375.26 | ON  | 351.96 | NIL | 312.61 |
| 4475 | ψSymA | ψ_SMA1957       | CDS | 1112318 | 1113208 + | 30 | 30 | ON  | 321.34 | ON  | 323.04 | ON  | 449.18 | ON  | 383.39 | NIL | 379.47 |
| 4476 | ψSymA | ψ_SMA1959       | CDS | 1113513 | 1114922 - | 30 | 30 | NIL | 270.17 | NIL | 266.05 | NIL | 276.19 | NIL | 273.88 | NIL | 307.53 |
| 4477 | ψSymA | ψ_SMA1960       | CDS | 1114922 | 1115299 + | 30 | 30 | NIL | 323.2  | ON  | 344.49 | ON  | 409.47 | ON  | 364    | NIL | 365.51 |
| 4478 | ψSymA | ψ_SMA1961       | CDS | 1115365 | 1116492 - | 30 | 30 | NIL | 296.3  | ON  | 332.31 | NIL | 335.74 | NIL | 310.01 | NIL | 359.75 |
| 4479 | ψSymA | ψ_SMA1962       | CDS | 1116746 | 1117555 + | 30 | 30 | NIL | 294.31 | NIL | 296.4  | NIL | 307.14 | NIL | 306.75 | NIL | 304.66 |
| 4480 | ψSymA | ψ_SMA1963       | CDS | 1118170 | 1118170 - | 30 | 30 | NIL | 251.04 | NIL | 274.49 | NIL | 326.57 | NIL | 270.12 | NIL | 254.81 |
| 4481 | ψSymA | ψ_SMA1965       | CDS | 1117694 | 1118769 + | 30 | 30 | ON  | 330.72 | ON  | 343.08 | NIL | 343.06 | ON  | 336.84 | ON  | 391.67 |
| 4482 | ψSymA | ψ_SMA1966       | CDS | 1119821 | 1119927 - | 30 | 30 | ON  | 334.56 | ON  | 334.76 | ON  | 381.34 | ON  | 383.16 | NIL | 359.2  |
| 4483 | ψSymA | ψ_SMA1967       | CDS | 1119543 | 1119881 + | 30 | 30 | NIL | 284.14 | NIL | 305.09 | NIL | 299.23 | NIL | 326.33 | NIL | 326.33 |
| 4484 | ψSymA | ψ_SMA1968       | CDS | 1120040 | 1120768 + | 30 | 30 | NIL | 282.54 | NIL | 306.07 | NIL | 306.07 | NIL | 286.15 | NIL | 326.26 |
| 4485 | ψSymA | ψ_SMA1969       | CDS | 1120845 | 1121684 + | 30 | 30 | NIL | 292.54 | NIL | 329.63 | ON  | 416.18 | NIL | 379.36 | NIL | 300.12 |
| 4486 | ψSymA | ψ_SMA1971       | CDS | 1121814 | 1122110 + | 30 | 30 | ON  | 363.79 | ON  | 329.49 | ON  | 336.1  | NIL | 410    | NIL | 317.12 |
| 4487 | ψSymA | ψ_SMA1973       | CDS | 1122124 | 1122483 + | 30 | 30 | NIL | 305.26 | NIL | 314.42 | NIL | 336.1  | NIL | 328.09 | NIL | 302.26 |
| 4488 | ψSymA | ψ_SMA1974       | CDS | 1123199 | 1124483 + | 30 | 30 | NIL | 306.71 | NIL | 317.14 | ON  | 288.63 | NIL | 295.86 | NIL | 307.18 |
| 4489 | ψSymA | ψ_SMA1976       | CDS | 1124129 | 1124129 - | 30 | 30 | NIL | 306.71 | NIL | 298.11 | ON  | 381.33 | NIL | 323.06 | NIL | 305.2  |
| 4490 | ψSymA | ψ_SMA1978       | CDS | 1124198 | 1124938   | 30 | 30 | NIL | 297.72 | NIL | 280.64 | NIL | 368.98 | NIL | 328.6  | NIL | 307.52 |
| 4491 | ψSymA | ψ_SMA1979       | CDS | 1124993 | 1125865 + | 30 | 30 | NIL | 271.87 | NIL | 316.99 | NIL | 366.52 | NIL | 321.76 | NIL | 321.76 |
| 4492 | ψSymA | ψ_SMA1985       | CDS | 1126439 | 1127479 - | 30 | 30 | ON  | 319.43 | ON  | 329.67 | ON  | 387.9  | NIL | 324.36 | NIL | 359.26 |
| 4493 | ψSymA | ψ_SMA1987       | CDS | 1127616 | 1128455 + | 30 | 30 | NIL | 349.49 | ON  | 337.34 | NIL | 362.42 | NIL | 346.69 | NIL | 345.26 |
| 4494 | ψSymA | ψ_SMA1989       | CDS | 1128670 | 1128967 - | 30 | 30 | NIL | 224.64 | NIL | 255.03 | NIL | 198.53 | NIL | 219.73 | NIL | 263.1  |
| 4495 | ψSymA | ψ_SMA1990       | CDS | 1129048 | 1129048 + | 30 | 30 | ON  | 234.2  | NIL | 309.53 | NIL | 283.93 | NIL | 282.7  | NIL | 280.09 |
| 4496 | ψSymA | ψ_SMA1993       | CDS | 1129777 | 1130406 + | 30 | 30 | NIL | 331.94 | NIL | 327.53 | NIL | 345.92 | ON  | 338.27 | NIL | 326.87 |
| 4497 | ψSymA | ψ_SMA1995       | CDS | 1130463 | 1131413 - | 30 | 30 | ON  | 348.79 | ON  | 326.6  | NIL | 323.08 | ON  | 337.74 | NIL | 303.42 |
| 4498 | ψSymA | ψ_SMA1996       | CDS | 1131416 | 1132387 - | 30 | 30 | NIL | 316.24 | NIL | 299.39 | NIL | 290.69 | NIL | 271.83 | NIL | 313.65 |
| 4499 | ψSymA | ψ_SMA1998       | CDS | 1132404 | 1133897 - | 30 | 30 | NIL | 315.63 | ON  | 336.06 | NIL | 337    | NIL | 293.97 | NIL | 309.57 |
| 4500 | ψSymA | ψ_SMA2000       | CDS | 1133958 | 1135034 - | 30 | 30 | NIL | 307.75 | NIL | 258.51 | NIL | 374.46 | ON  | 430.72 | NIL | 313.12 |
| 4501 | ψSymA | ψ_SMA2002       | CDS | 1135285 | 1135947 + | 30 | 30 | ON  | 365.12 | ON  | 362.78 | NIL | 363.27 | ON  | 430.72 | NIL | 368.3  |
| 4502 | ψSymA | ψ_SMA2004       | CDS | 1136007 | 1137080 + | 30 | 30 | ON  | 346.72 | ON  | 364.12 | NIL | 363.27 | ON  | 359.91 | NIL | 347.27 |
| 4503 | ψSymA | ψ_SMA2008       | CDS | 1137545 | 1138150 - | 30 | 30 | ON  | 361.36 | ON  | 387.16 | ON  | 489.13 | NIL | 471.63 | NIL | 375.57 |
| 4504 | ψSymA | ψ_SMA2009       | CDS | 1138205 | 1138654 + | 31 | 31 | NIL | 288.62 | NIL | 301.02 | NIL | 362.46 | NIL | 299.4  | NIL | 309.06 |
| 4505 | ψSymA | ψ_SMA2011       | CDS | 1138651 | 1138977 + | 30 | 30 | NIL | 265.81 | NIL | 289.14 | NIL | 315.73 | NIL | 297.13 | NIL | 305.86 |
| 4506 | ψSymA | ψ_SMA2012       | CDS | 1139046 | 1140904 - | 30 | 30 | NIL | 244.71 | NIL | 284.43 | NIL | 261.4  | NIL | 240.57 | NIL | 280.56 |
| 4507 | ψSymA | ψ_SMA2014       | CDS | 1141504 | 1141941 - | 32 | 32 | NIL | 300.29 | NIL | 309.43 | NIL | 321.9  | NIL | 350.92 | NIL | 347.65 |
| 4508 | ψSymA | ψ_SMA2015       | CDS | 1141886 | 1142407 - | 31 | 30 | ON  | 326.73 | NIL | 284.64 | NIL | 336.52 | NIL | 327.14 | NIL | 372.78 |
| 4509 | ψSymA | ψ_SMA2019       | CDS | 1143193 | 1143603 + | 30 | 30 | NIL | 285.23 | NIL | 306.55 | ON  | 387.49 | NIL | 326.98 | NIL | 369.35 |
| 4510 | ψSymA | ψ_SMA2020       | CDS | 1143618 | 1144065 - | 30 | 30 | ON  | 352.83 | ON  | 412.58 | NIL | 296.64 | ON  | 341.15 | NIL | 345.02 |
| 4511 | ψSymA | ψ_SMA2023       | CDS | 1144290 | 1145021 + | 30 | 30 | ON  | 318.18 | NIL | 304.59 | NIL | 326.01 | NIL | 313.54 | NIL | 320.01 |
| 4512 | ψSymA | ψ_SMA2025       | CDS | 1145104 | 1146840 + | 30 | 30 | ON  | 334.28 | NIL | 334.06 | NIL | 371.38 | NIL | 350.5  | NIL | 334.04 |
| 4513 | ψSymA | ψ_SMA2027       | CDS | 1147165 | 1148058 - | 30 | 29 | NIL | 281.11 | NIL | 299.97 | NIL | 314.93 | NIL | 329.67 | NIL | 335.27 |
| 4514 | ψSymA | ψ_SMA2029       | CDS | 1148324 | 1148864 + | 30 | 30 | NIL | 286.41 | NIL | 317.52 | NIL | 369.31 | NIL | 353.45 | NIL | 297.35 |
| 4515 | ψSymA | ψ_SMA2031       | CDS | 1149245 | 1149245 + | 31 | 31 | ON  | 394.62 | ON  | 398.62 | ON  | 444.92 | ON  | 416.39 | ON  | 395.86 |
| 4516 | ψSymA | ψ_SMA2032       | CDS | 1149874 | 1149245 + | 35 | 35 | NIL | 291.07 | ON  | 323.96 | NIL | 344.82 | NIL | 298.25 | NIL | 380.83 |
| 4517 | ψSymA | ψ_SMA2033       | CDS | 1149915 | 1150712 + | 30 | 30 | ON  | 313.13 | NIL | 327.29 | ON  | 406.1  | ON  | 354.4  | ON  | 406.06 |
| 4518 | ψSymA | ψ_SMA2034       | CDS | 1151643 | 1151888 - | 30 | 30 | NIL | 291.79 | NIL | 293.97 | NIL | 365.24 | ON  | 360.38 | NIL | 378.84 |
| 4519 | ψSymA | ψ_SMA2037       | CDS | 1151898 | 1154330 - | 30 | 30 | NIL | 300.05 | ON  | 430.89 | ON  | 336.4  | ON  | 385.54 | NIL | 337.74 |
| 4520 | ψSymA | ψ_SMA2041       | CDS | 1154629 | 1155489 - | 30 | 30 | NIL | 387.43 | ON  | 449.88 | ON  | 396.04 | ON  | 494    | ON  | 480.25 |
| 4521 | ψSymA | ψ_SMA2043       | CDS | 1156413 | 1156547 + | 54 | 3  | ON  | 993.72 | ON  | 658.43 | ON  | 543.67 | ON  | 632.67 | ON  | 506.37 |
| 4522 | ψSymA | ψ_SMA2045       | CDS | 1156613 | 1157086 + | 53 | 0  | ON  | 371.95 | ON  | 325.94 | NIL | 295.13 | ON  | 362.8  | ON  | 320.16 |
| 4523 | ψSymA | ψ_SMA2047       | CDS | 1157277 | 1158278 + | 64 | 0  | ON  | 275.91 | NIL | 284.21 | NIL | 285.8  | NIL | 292.71 | NIL | 307.57 |
| 4524 | ψSymA | ψ_SMA2049       | CDS | 1158529 | 1159611 + | 30 | 30 | ON  | 355.04 | ON  | 343.63 | ON  | 435.12 | ON  | 362.02 | NIL | 364.58 |
| 4525 | ψSymA | ψ_SMA2051       | CDS | 1159791 | 1160825 + | 31 | 31 | NIL | 281.33 | NIL | 289.39 | NIL | 295.07 | NIL | 311.84 | NIL | 293.32 |
| 4526 | ψSymA | ψ_SMA2053       | CDS | 1160822 | 1161133 + | 30 | 30 | NIL | 258.43 | NIL | 277.46 | NIL | 308.15 | NIL | 286.9  | NIL | 284.77 |
| 4527 | ψSymA | ψ_SMA2055       | CDS | 1161208 | 1161459 + | 30 | 30 | NIL | 235.74 | NIL | 276.92 | NIL | 253.55 | NIL | 259.99 | NIL | 268.21 |

|      |       |                    |      |         |         |   |    |    |     |        |     |        |     |        |     |        |     |        |
|------|-------|--------------------|------|---------|---------|---|----|----|-----|--------|-----|--------|-----|--------|-----|--------|-----|--------|
| 4527 | PSYMA | ?_SMA2057          | CD5  | 1161474 | 1161689 | - | 30 | 9  | NIL | 280.58 | NIL | 277.43 | NIL | 383.89 | ON  | 333.04 | NIL | 363.29 |
| 4528 | PSYMA | ?_SMA2059          | CD5  | 1161899 | 1162589 | - | 30 | 30 | NIL | 233.37 | NIL | 248.76 | NIL | 264.68 | ON  | 254.54 | NIL | 268.06 |
| 4529 | PSYMA | ?_SMA2061          | CD5  | 1162596 | 1162901 | + | 30 | 30 | NIL | 256.69 | NIL | 289.14 | NIL | 268.41 | NIL | 260.05 | NIL | 268.4  |
| 4530 | PSYMA | ?_SMA2063          | CD5  | 1164048 | 1165091 | + | 30 | 30 | NIL | 279.31 | NIL | 262.79 | NIL | 293.82 | NIL | 311.08 | NIL | 305.84 |
| 4531 | PSYMA | ?_SMA2065          | CD5  | 1165103 | 1165492 | + | 30 | 30 | NIL | 290.67 | NIL | 284.96 | NIL | 335.97 | NIL | 311.83 | NIL | 300.73 |
| 4532 | PSYMA | ?_SMA2067          | CD5  | 1165852 | 1166899 | + | 30 | 30 | NIL | 346.53 | ON  | 372.99 | NIL | 364.61 | ON  | 371.56 | ON  | 355.58 |
| 4533 | PSYMA | ?_SMA2069          | CD5  | 1166777 | 1168002 | - | 30 | 30 | ON  | 337.53 | ON  | 381.42 | NIL | 349.06 | NIL | 320.16 | ON  | 385.34 |
| 4534 | PSYMA | ?_SMA2071          | CD5  | 1168555 | 1168845 | - | 30 | 30 | NIL | 249.06 | NIL | 317.15 | NIL | 347.74 | NIL | 306.94 | NIL | 335.91 |
| 4535 | PSYMA | ?_SMA2073          | CD5  | 1169453 | 1170676 | - | 30 | 30 | NIL | 304.14 | ON  | 282.17 | NIL | 353.45 | NIL | 302.81 | NIL | 344.28 |
| 4536 | PSYMA | ?_SMA2075          | CD5  | 1172395 | 1172395 | - | 30 | 30 | ON  | 313.34 | ON  | 335.83 | NIL | 304.15 | NIL | 303.77 | NIL | 311.93 |
| 4537 | PSYMA | ?_SMA2077          | CD5  | 1173082 | 1174143 | - | 30 | 30 | ON  | 312.16 | NIL | 326.72 | ON  | 320.64 | NIL | 357.42 | NIL | 299.38 |
| 4538 | PSYMA | ?_SMA2079          | CD5  | 1175158 | 1175102 | - | 31 | 31 | ON  | 315.7  | ON  | 356.67 | NIL | 369.37 | NIL | 366.1  | ON  | 368.93 |
| 4539 | PSYMA | ?_SMA2081          | CD5  | 1176080 | 1176078 | - | 30 | 30 | ON  | 326.47 | ON  | 355.67 | NIL | 360.42 | NIL | 322.02 | NIL | 353.25 |
| 4540 | PSYMA | ?_SMA2083          | CD5  | 1176081 | 1177079 | - | 30 | 30 | ON  | 348.36 | NIL | 323.43 | NIL | 301.07 | NIL | 322.73 | NIL | 288.54 |
| 4541 | PSYMA | ?_SMA2085          | CD5  | 1177079 | 1178065 | - | 30 | 30 | NIL | 318.12 | NIL | 311.45 | NIL | 313.05 | NIL | 322.15 | NIL | 291.59 |
| 4542 | PSYMA | ?_SMA2087          | CD5  | 1178462 | 1179402 | + | 30 | 30 | NIL | 285.24 | ON  | 348.08 | NIL | 289.83 | NIL | 289.17 | NIL | 292.7  |
| 4543 | PSYMA | ?_SMA2089          | CD5  | 1179416 | 1179749 | + | 30 | 30 | NIL | 260.03 | NIL | 276.29 | NIL | 309.41 | NIL | 254.9  | NIL | 312.34 |
| 4544 | PSYMA | ?_SMA2091          | CD5  | 1179760 | 1180647 | + | 30 | 30 | ON  | 343.26 | NIL | 322.69 | NIL | 341.79 | NIL | 327.03 | NIL | 298.19 |
| 4545 | PSYMA | ?_SMA2093          | CD5  | 1180657 | 1181691 | + | 30 | 30 | NIL | 297.54 | NIL | 298.07 | NIL | 295.76 | NIL | 304.12 | NIL | 308.73 |
| 4546 | PSYMA | ?_SMA2095          | CD5  | 1181688 | 1182566 | + | 30 | 30 | ON  | 322.6  | NIL | 317.83 | NIL | 325.27 | NIL | 311.13 | NIL | 299.67 |
| 4547 | PSYMA | ?_SMA2097          | CD5  | 1182923 | 1183813 | + | 30 | 30 | ON  | 348.71 | ON  | 344.38 | NIL | 318.93 | NIL | 349.69 | NIL | 333.67 |
| 4548 | PSYMA | ?_SMA2099          | CD5  | 1183910 | 1184482 | + | 30 | 30 | ON  | 318.08 | ON  | 349.97 | NIL | 301.6  | NIL | 304.74 | NIL | 315.98 |
| 4549 | PSYMA | ?_SMA2101          | CD5  | 1184498 | 1185799 | + | 30 | 30 | NIL | 299.64 | NIL | 280.12 | NIL | 299.79 | NIL | 307.76 | NIL | 299.69 |
| 4550 | PSYMA | ?_SMA2103          | CD5  | 1185925 | 1187331 | - | 30 | 30 | NIL | 323.72 | ON  | 359.88 | ON  | 427.73 | ON  | 396.02 | ON  | 425.38 |
| 4551 | PSYMA | ?_SMA2105          | CD5  | 1187704 | 1189924 | + | 30 | 30 | ON  | 322.7  | ON  | 346.27 | NIL | 318.55 | ON  | 378.09 | NIL | 435.66 |
| 4552 | PSYMA | ?_SMA2107          | CD5  | 1189053 | 1189958 | - | 30 | 30 | ON  | 485.33 | ON  | 485.75 | NIL | 356.83 | ON  | 402.56 | ON  | 435.03 |
| 4553 | PSYMA | ?_SMA2109          | CD5  | 1190029 | 1190955 | + | 30 | 30 | NIL | 264.04 | NIL | 307.32 | NIL | 328.56 | NIL | 326.38 | NIL | 320.47 |
| 4554 | PSYMA | ?_SMA2111          | CD5  | 1191694 | 1193313 | + | 30 | 30 | NIL | 285.71 | NIL | 284.65 | NIL | 331.96 | NIL | 299.21 | NIL | 316.64 |
| 4555 | PSYMA | 8dHCC2_SMA2113     | CD5  | 1193878 | 1195005 | - | 30 | 18 | ON  | 316.56 | NIL | 308.52 | NIL | 323.73 | NIL | 289.59 | NIL | 314.89 |
| 4556 | PSYMA | g8T13_SMA2115      | CD5  | 1195054 | 1195701 | - | 30 | 30 | NIL | 304.77 | NIL | 278.81 | NIL | 266.69 | NIL | 273.93 | NIL | 282.81 |
| 4557 | PSYMA | ?_SMA2117          | CD5  | 1195713 | 1197479 | - | 30 | 30 | NIL | 328.75 | NIL | 321.14 | NIL | 329.22 | ON  | 351.16 | NIL | 337.88 |
| 4558 | PSYMA | ?_SMA2119          | CD5  | 1197522 | 1198448 | - | 30 | 30 | ON  | 329.51 | ON  | 351.79 | NIL | 306.49 | NIL | 373.46 | ON  | 389.86 |
| 4559 | PSYMA | ?_SMA2121          | CD5  | 1198464 | 1199327 | - | 30 | 30 | NIL | 301.41 | ON  | 337.23 | NIL | 309.93 | NIL | 302.41 | ON  | 326.93 |
| 4560 | PSYMA | ?_SMA2123          | CD5  | 1199735 | 1200667 | - | 31 | 31 | ON  | 321.34 | NIL | 291.75 | NIL | 279.27 | NIL | 286.79 | ON  | 296.15 |
| 4561 | PSYMA | ?_SMA2125          | CD5  | 1200660 | 1201739 | - | 31 | 31 | NIL | 280.48 | NIL | 301.02 | NIL | 336.13 | NIL | 332.9  | ON  | 377.88 |
| 4562 | PSYMA | ?_SMA2127          | CD5  | 1201708 | 1203258 | - | 30 | 30 | NIL | 262.29 | NIL | 276.37 | NIL | 297.07 | NIL | 266.33 | NIL | 300.05 |
| 4563 | PSYMA | ?_SMA2129          | CD5  | 1204331 | 1204331 | - | 30 | 30 | NIL | 266.07 | NIL | 276.37 | NIL | 291.9  | NIL | 302.23 | NIL | 310.56 |
| 4564 | PSYMA | ?_SMA2131          | CD5  | 1204556 | 1205413 | - | 30 | 30 | NIL | 292.44 | NIL | 285.41 | NIL | 326.37 | NIL | 287.94 | NIL | 307.71 |
| 4565 | PSYMA | ?_SMA2133          | CD5  | 1205622 | 1206439 | - | 30 | 30 | NIL | 279.95 | NIL | 295.41 | NIL | 307.28 | NIL | 321.61 | NIL | 316.33 |
| 4566 | PSYMA | gHvA2_SMA2135      | CD5  | 1206555 | 1207823 | - | 30 | 30 | NIL | 289.77 | NIL | 299.52 | NIL | 339.91 | ON  | 352.79 | NIL | 328.26 |
| 4567 | PSYMA | ?_SMA2137          | CD5  | 1207895 | 1208869 | - | 30 | 30 | NIL | 341.27 | NIL | 309.52 | NIL | 359.5  | ON  | 391.89 | NIL | 384.64 |
| 4568 | PSYMA | sgRA_SMA2139       | CD5  | 1208866 | 1210071 | - | 30 | 30 | NIL | 278.97 | NIL | 283.46 | NIL | 319.53 | NIL | 309.94 | NIL | 304.61 |
| 4569 | PSYMA | ?_SMA2141          | CD5  | 1210165 | 1211025 | - | 36 | 36 | NIL | 264.94 | NIL | 270.26 | NIL | 281    | NIL | 271.26 | NIL | 274.66 |
| 4570 | PSYMA | ?_SMA2143          | CD5  | 1211022 | 1211975 | - | 30 | 30 | NIL | 276.99 | NIL | 270    | NIL | 316.66 | NIL | 287.01 | NIL | 331.02 |
| 4571 | PSYMA | ?_SMA2145          | CD5  | 1212031 | 1213287 | - | 30 | 30 | NIL | 268.41 | NIL | 279.91 | NIL | 277.82 | NIL | 304.78 | NIL | 336.2  |
| 4572 | PSYMA | ?_SMA2147          | CD5  | 1213698 | 1214588 | - | 61 | 13 | NIL | 272.59 | NIL | 292.56 | NIL | 271.47 | NIL | 304.78 | NIL | 295.81 |
| 4573 | PSYMA | ?_SMA2151          | CD5  | 1215193 | 1215624 | + | 30 | 30 | ON  | 460.86 | ON  | 378.78 | NIL | 288.39 | NIL | 318.17 | NIL | 326.35 |
| 4574 | PSYMA | ?_SMA2153          | CD5  | 1215675 | 1215908 | + | 30 | 30 | ON  | 380.46 | ON  | 374.96 | NIL | 274.96 | ON  | 344.99 | NIL | 329.56 |
| 4575 | PSYMA | ?_SMA2157          | CD5  | 1216795 | 1217778 | + | 32 | 32 | NIL | 279.5  | NIL | 290.63 | NIL | 312.39 | NIL | 291.03 | NIL | 302.88 |
| 4576 | PSYMA | ?_SMA2159          | CD5  | 1217748 | 1218461 | + | 31 | 31 | ON  | 315.4  | NIL | 307.08 | ON  | 402.5  | ON  | 370.75 | ON  | 386.63 |
| 4577 | PSYMA | ?_SMA2161          | CD5  | 1218536 | 1218754 | - | 30 | 30 | ON  | 343.16 | ON  | 442.62 | NIL | 299.8  | NIL | 302.53 | NIL | 330.83 |
| 4578 | PSYMA | ?_SMA2163          | CD5  | 1218761 | 1219489 | + | 30 | 30 | ON  | 328.52 | ON  | 345.6  | NIL | 361.43 | ON  | 363.59 | ON  | 391.62 |
| 4579 | PSYMA | ?_SMA2165          | CD5  | 1219615 | 1220355 | + | 30 | 30 | NIL | 283.94 | NIL | 283.18 | NIL | 307.12 | NIL | 312.12 | NIL | 348.86 |
| 4580 | PSYMA | ?_SMA2167          | CD5  | 1221480 | 1221947 | + | 30 | 30 | NIL | 245.84 | NIL | 250.8  | NIL | 274.63 | NIL | 288.4  | NIL | 286.58 |
| 4581 | PSYMA | IRNA-Mel-6_SMA2168 | IRNA | 1222024 | 1222096 | - | 30 | 24 | NIL | 219.85 | NIL | 244.2  | NIL | 214.47 | NIL | 211.52 | NIL | 294.57 |
| 4582 | PSYMA | ?_SMA2169          | CD5  | 1222135 | 1222612 | - | 30 | 30 | ON  | 348.07 | ON  | 390.82 | ON  | 381.22 | ON  | 364.46 | NIL | 362.5  |
| 4583 | PSYMA | ?_SMA2171          | CD5  | 1222966 | 1224603 | - | 87 | 1  | ON  | 327.99 | ON  | 312.53 | ON  | 323.72 | ON  | 310.27 | ON  | 344.47 |
| 4584 | PSYMA | ?_SMA2175          | CD5  | 1225061 | 1226050 | - | 30 | 0  | NIL | 265.24 | NIL | 289.85 | NIL | 262.8  | NIL | 285.99 | NIL | 277.28 |
| 4585 | PSYMA | ?_SMA2187          | CD5  | 1226047 | 1226961 | - | 30 | 0  | NIL | 318.32 | NIL | 299.85 | NIL | 308.08 | NIL | 320.3  | NIL | 303.66 |
| 4586 | PSYMA | ?_SMA2189          | CD5  | 1226955 | 1228184 | - | 30 | 0  | NIL | 318.32 | NIL | 299.48 | NIL | 310.43 | NIL | 291.21 | NIL | 288.19 |
| 4587 | PSYMA | ?_SMA2191          | CD5  | 1228777 | 1228777 | - | 43 | 0  | ON  | 313.42 | ON  | 302.47 | NIL | 336.97 | ON  | 323.62 | NIL | 310.37 |
| 4588 | PSYMA | ?_SMA2193          | CD5  | 1228832 | 1230145 | - | 30 | 30 | NIL | 291    | NIL | 302.47 | NIL | 303.4  | NIL | 323.64 | NIL | 288.38 |
| 4589 | PSYMA | ?_SMA2195          | CD5  | 1230910 | 1231826 | - | 30 | 30 | ON  | 331.49 | NIL | 300.45 | NIL | 328.11 | NIL | 311.35 | NIL | 358.45 |
| 4590 | PSYMA | ?_SMA2197          | CD5  | 1230912 | 1231826 | - | 30 | 30 | NIL | 304.78 | NIL | 285.93 | NIL | 241.73 | NIL | 314.69 | NIL | 293.64 |
| 4591 | PSYMA | ?_SMA2199          | CD5  | 1231890 | 1232780 | - | 30 | 30 | NIL | 263.03 | NIL | 286.52 | NIL | 303.63 | NIL | 316.65 | NIL | 289.63 |
| 4592 | PSYMA | ?_SMA2201          | CD5  | 1232923 | 1233272 | - | 30 | 30 | NIL | 297.46 | NIL | 302.97 | NIL | 298.7  | NIL | 303.08 | NIL | 290.85 |
| 4593 | PSYMA | ?_SMA2203          | CD5  | 1233563 | 1234157 | - | 31 | 31 | NIL | 302.42 | NIL | 305.9  | NIL | 278.76 | NIL | 280.52 | NIL | 295.97 |
| 4594 | PSYMA | ?_SMA2205          | CD5  | 1234154 | 1235023 | - | 31 | 31 | NIL | 308.33 | NIL | 296    | NIL | 239.64 | NIL | 315.04 | NIL | 304.22 |
| 4595 | PSYMA | ?_SMA2207          | CD5  | 1235016 | 1236101 | - | 30 | 30 | NIL | 301.98 | NIL | 295.91 | NIL | 312.94 | NIL | 318.85 | NIL | 367.23 |
| 4596 | PSYMA | ?_SMA2209          | CD5  | 1236212 | 1237354 | - | 30 | 30 | NIL | 297.99 | NIL | 269.61 | NIL | 317.26 | NIL | 338.98 | NIL | 328.78 |
| 4597 | PSYMA | IRb2-2_SMA2211     | CD5  | 1237356 | 1239056 | - | 30 | 30 | ON  | 351.33 | ON  | 335.1  | NIL | 350.71 | NIL | 361.23 | NIL | 330.22 |
| 4598 | PSYMA | ?_SMA2213          | CD5  | 1239073 | 1240557 | - | 30 | 30 | ON  | 308.96 | NIL | 311.69 | NIL | 277.49 | NIL | 293.14 | NIL | 308.05 |

|      |       |               |     |         |           |    |    |     |        |     |         |     |        |     |        |     |        |
|------|-------|---------------|-----|---------|-----------|----|----|-----|--------|-----|---------|-----|--------|-----|--------|-----|--------|
| 4599 | ψSYMA | ?_SMA2215     | CD5 | 1240820 | 1241587 + | 31 | 31 | ON  | 354.96 | ON  | 336.23  | NIL | 348.93 | NIL | 308.89 | NIL | 319.39 |
| 4600 | ψSYMA | ?_SMA2217     | CD5 | 1241529 | 1242935 + | 31 | 31 | ON  | 357.57 | ON  | 339.76  | NIL | 347.55 | NIL | 314.99 | NIL | 316.39 |
| 4601 | ψSYMA | ?_SMA2219     | CD5 | 1242938 | 1243531 + | 30 | 30 | ON  | 359.73 | NIL | 292.67  | NIL | 372.97 | NIL | 297.85 | NIL | 321.36 |
| 4602 | ψSYMA | ?_SMA2221     | CD5 | 1243528 | 1244241 + | 30 | 30 | NIL | 289.58 | NIL | 292.13  | NIL | 331.34 | NIL | 288.04 | NIL | 303.75 |
| 4603 | ψSYMA | ?_SMA2223     | CD5 | 1244238 | 1245344 + | 30 | 30 | NIL | 333.66 | NIL | 298.92  | NIL | 305.94 | ON  | 347.25 | NIL | 296.03 |
| 4604 | ψSYMA | ?_SMA2225     | CD5 | 1245645 | 1247021 + | 30 | 30 | ON  | 326.75 | ON  | 336.86  | NIL | 335.04 | NIL | 323.51 | NIL | 348.74 |
| 4605 | ψSYMA | ?_SMA2227     | CD5 | 1247113 | 1248060 - | 30 | 30 | ON  | 338.7  | ON  | 331.13  | NIL | 342.19 | NIL | 315.37 | NIL | 306.77 |
| 4606 | ψSYMA | ?_SMA2229     | CD5 | 1248077 | 1248604 - | 30 | 30 | NIL | 253.73 | NIL | 292.79  | NIL | 307.94 | NIL | 334.89 | NIL | 345.69 |
| 4607 | ψSYMA | ?_SMA2231     | CD5 | 1249316 | 1249699 - | 30 | 30 | ON  | 326.01 | ON  | 337.84  | NIL | 295.44 | NIL | 295.68 | NIL | 292.78 |
| 4608 | ψSYMA | ?_SMA2233     | CD5 | 1250151 | 1251050 - | 30 | 30 | NIL | 354.07 | NIL | 308.24  | NIL | 336.09 | NIL | 314.49 | NIL | 342.43 |
| 4609 | ψSYMA | ?_SMA2235     | CD5 | 1251186 | 1252820 + | 30 | 30 | NIL | 293.8  | NIL | 290.67  | NIL | 298.72 | NIL | 270.47 | NIL | 297.36 |
| 4610 | ψSYMA | ?_SMA2237     | CD5 | 1253110 | 1254114 - | 30 | 30 | NIL | 262.19 | NIL | 283.56  | NIL | 263.23 | NIL | 265.89 | ON  | 280.38 |
| 4611 | ψSYMA | ?_SMA2239     | CD5 | 1254259 | 1255038 + | 30 | 30 | ON  | 455.85 | ON  | 557.51  | ON  | 378.66 | ON  | 662.9  | ON  | 387.7  |
| 4612 | ψSYMA | ?_SMA2241     | CD5 | 1255074 | 1256321 + | 30 | 30 | ON  | 389.83 | ON  | 460.31  | NIL | 305.56 | ON  | 367.59 | NIL | 334.48 |
| 4613 | ψSYMA | ?_SMA2243     | CD5 | 1256339 | 1257265 - | 30 | 30 | ON  | 380.85 | ON  | 340.43  | NIL | 321.83 | NIL | 281.95 | NIL | 321.84 |
| 4614 | ψSYMA | ?_SMA2245     | CD5 | 1257344 | 1259881 - | 30 | 30 | ON  | 507.33 | ON  | 532.52  | NIL | 294.64 | ON  | 354.13 | NIL | 287.9  |
| 4615 | ψSYMA | ?_SMA2247     | CD5 | 1260073 | 1260228 + | 30 | 30 | NIL | 382.34 | ON  | 396.04  | NIL | 373.84 | ON  | 340.58 | NIL | 369.38 |
| 4616 | ψSYMA | ?_SMA2249     | CD5 | 1260671 | 1261777 + | 30 | 30 | ON  | 300.5  | NIL | 317.84  | NIL | 309.48 | NIL | 309.48 | NIL | 323.62 |
| 4617 | ψSYMA | ?_SMA2251     | CD5 | 1261774 | 1262337 + | 30 | 30 | NIL | 283.43 | NIL | 291.16  | NIL | 338.74 | NIL | 289.73 | NIL | 281.3  |
| 4618 | ψSYMA | ?_SMA2253     | CD5 | 1263795 | 1263672 + | 30 | 30 | NIL | 357.2  | ON  | 357.12  | NIL | 336.67 | ON  | 385.07 | NIL | 318.57 |
| 4619 | ψSYMA | ?_SMA2255     | CD5 | 1263675 | 1264013 + | 30 | 28 | ON  | 384.73 | ON  | 378.86  | NIL | 376.57 | ON  | 421.16 | ON  | 410.04 |
| 4620 | ψSYMA | ?_SMA2257     | CD5 | 1264010 | 1265167 + | 30 | 30 | ON  | 474.96 | ON  | 505.32  | ON  | 470.76 | ON  | 498.2  | ON  | 389.33 |
| 4621 | ψSYMA | ?_SMA2259     | CD5 | 1265174 | 1265599 - | 30 | 29 | NIL | 291.84 | NIL | 278.75  | NIL | 311.4  | NIL | 314.65 | NIL | 281.15 |
| 4622 | ψSYMA | ?_SMA2261     | CD5 | 1265599 | 1266466 - | 30 | 30 | NIL | 237.59 | NIL | 262.14  | NIL | 295.62 | NIL | 258.01 | NIL | 344.12 |
| 4623 | ψSYMA | ?_SMA2263     | CD5 | 1266850 | 1266860 + | 32 | 32 | NIL | 238.44 | NIL | 254.93  | NIL | 235.33 | NIL | 227.23 | NIL | 269.83 |
| 4624 | ψSYMA | ?_SMA2265     | CD5 | 1266850 | 1267101 + | 30 | 30 | NIL | 264.27 | NIL | 267     | NIL | 261.33 | NIL | 257.95 | NIL | 283.92 |
| 4625 | ψSYMA | ?_SMA2267     | CD5 | 1267177 | 1267737 - | 30 | 30 | NIL | 343.61 | ON  | 349.15  | NIL | 287.59 | NIL | 301.5  | NIL | 313.52 |
| 4626 | ψSYMA | ?_SMA2269     | CD5 | 1267896 | 1268162 + | 30 | 30 | NIL | 253.6  | NIL | 298.49  | NIL | 287.59 | NIL | 263.33 | NIL | 272    |
| 4627 | ψSYMA | ?_SMA2271     | CD5 | 1268192 | 1268434 + | 30 | 30 | NIL | 307.38 | ON  | 323.12  | ON  | 392.44 | ON  | 364.62 | ON  | 386.2  |
| 4628 | ψSYMA | ?_SMA2273     | CD5 | 1268471 | 1268821 - | 31 | 31 | NIL | 250.42 | NIL | 234.69  | NIL | 268.68 | NIL | 253.92 | NIL | 281.49 |
| 4629 | ψSYMA | ?_SMA2275     | CD5 | 1268802 | 1269077 - | 30 | 29 | NIL | 274.39 | NIL | 264.04  | ON  | 404.03 | NIL | 330    | NIL | 312.28 |
| 4630 | ψSYMA | ?_SMA2277     | CD5 | 1269373 | 1269753 + | 30 | 28 | NIL | 261.86 | NIL | 256.79  | NIL | 250.25 | NIL | 280.64 | NIL | 284.66 |
| 4631 | ψSYMA | ?_SMA2279     | CD5 | 1269911 | 1270393 - | 31 | 31 | NIL | 255.66 | NIL | 293.21  | NIL | 344.26 | NIL | 313.76 | NIL | 311.8  |
| 4632 | ψSYMA | ?_SMA2281     | CD5 | 1270390 | 1270722 - | 30 | 30 | NIL | 299.35 | NIL | 316.74  | ON  | 380.73 | ON  | 358.42 | ON  | 479.52 |
| 4633 | ψSYMA | ?_SMA2283     | CD5 | 1270951 | 1271364 - | 30 | 30 | NIL | 350.88 | ON  | 375.24  | ON  | 544.23 | ON  | 425.24 | ON  | 520.72 |
| 4634 | ψSYMA | ?_SMA2285     | CD5 | 1271330 | 1271806 + | 30 | 30 | ON  | 329.09 | ON  | 346.58  | ON  | 396.91 | ON  | 360.53 | NIL | 370.62 |
| 4635 | ψSYMA | ?_SMA2287     | CD5 | 1271938 | 1272885 - | 30 | 30 | ON  | 352.95 | ON  | 343.86  | ON  | 374.46 | ON  | 279.89 | ON  | 387.44 |
| 4636 | ψSYMA | ?_SMA2289     | CD5 | 1273011 | 1273403 + | 30 | 30 | NIL | 296.2  | NIL | 315.62  | NIL | 326.76 | NIL | 292.18 | NIL | 293.64 |
| 4637 | ψSYMA | ?_SMA2291     | CD5 | 1273405 | 1274517 + | 30 | 30 | NIL | 310.97 | NIL | 306.66  | NIL | 327.34 | NIL | 279.26 | NIL | 313.25 |
| 4638 | ψSYMA | ?_SMA2293     | CD5 | 1274593 | 1275477 + | 30 | 30 | NIL | 278.84 | NIL | 275.58  | NIL | 327.34 | NIL | 279.26 | NIL | 316.39 |
| 4639 | ψSYMA | mcA2.SMA2294  | CD5 | 1275788 | 1279774 + | 30 | 30 | NIL | 281.87 | ON  | 753.02  | ON  | 484.23 | ON  | 537.81 | NIL | 494.09 |
| 4640 | ψSYMA | ?_SMA2295     | CD5 | 1278152 | 1279483 + | 30 | 30 | NIL | 247.41 | NIL | 261.37  | NIL | 277.9  | NIL | 305.59 | NIL | 285.26 |
| 4641 | ψSYMA | ?_SMA2297     | CD5 | 1279649 | 1280700 + | 30 | 30 | ON  | 371.19 | ON  | 398.84  | ON  | 479.85 | ON  | 378.11 | ON  | 398.51 |
| 4642 | ψSYMA | ?_SMA2299     | CD5 | 1280762 | 1281688 - | 37 | 0  | ON  | 352.26 | ON  | 371.48  | NIL | 323.81 | ON  | 365.29 | NIL | 342.16 |
| 4643 | ψSYMA | ?_SMA2301     | CD5 | 1281993 | 1283339 - | 30 | 30 | ON  | 320.39 | ON  | 342.4   | NIL | 298.89 | NIL | 286.33 | NIL | 325.36 |
| 4644 | ψSYMA | ?_SMA2303     | CD5 | 1283423 | 1284649 - | 30 | 30 | ON  | 356.31 | ON  | 378.16  | NIL | 371.03 | ON  | 401.93 | NIL | 375.43 |
| 4645 | ψSYMA | ?_SMA2305     | CD5 | 1284716 | 1286095 + | 30 | 30 | NIL | 286.76 | NIL | 322.26  | NIL | 347.68 | NIL | 332.27 | NIL | 386.23 |
| 4646 | ψSYMA | ?_SMA2307     | CD5 | 1286173 | 1287096 + | 31 | 31 | NIL | 280.33 | NIL | 317.66  | NIL | 302.45 | NIL | 270.91 | ON  | 328.68 |
| 4647 | ψSYMA | ?_SMA2309     | CD5 | 1287072 | 1287893 + | 31 | 31 | ON  | 361.54 | ON  | 363.9   | NIL | 352.61 | NIL | 329.71 | NIL | 351.5  |
| 4648 | ψSYMA | ?_SMA2311     | CD5 | 1287890 | 1289116 + | 30 | 30 | ON  | 338.9  | ON  | 344.83  | NIL | 353.38 | ON  | 346.91 | NIL | 351.31 |
| 4649 | ψSYMA | ?_SMA2313     | CD5 | 1289113 | 1291146 + | 30 | 30 | NIL | 297.93 | NIL | 279.26  | NIL | 310    | NIL | 320.51 | ON  | 297.39 |
| 4650 | ψSYMA | ?_SMA2315     | CD5 | 1291278 | 1291817 + | 30 | 30 | NIL | 380.62 | ON  | 332.14  | NIL | 348.59 | ON  | 368.69 | ON  | 385.21 |
| 4651 | ψSYMA | ?_SMA2317     | CD5 | 1291827 | 1292054 + | 30 | 30 | NIL | 250.19 | NIL | 259.86  | NIL | 322.36 | NIL | 311.51 | NIL | 282.41 |
| 4652 | ψSYMA | gR14.SMA2319  | CD5 | 1292213 | 1292809 + | 30 | 30 | ON  | 343.49 | ON  | 377.64  | NIL | 321.83 | ON  | 372.5  | NIL | 344.76 |
| 4653 | ψSYMA | lvR2D.SMA2321 | CD5 | 1293347 | 1295416 + | 30 | 30 | ON  | 333.04 | ON  | 331.96  | NIL | 362.16 | ON  | 365.72 | NIL | 349.23 |
| 4654 | ψSYMA | ?_SMA2323     | CD5 | 1295347 | 1296166 + | 30 | 30 | NIL | 291.46 | NIL | 272.92  | NIL | 279    | NIL | 299.96 | NIL | 319.83 |
| 4655 | ψSYMA | ?_SMA2325     | CD5 | 1296590 | 1297082 - | 30 | 30 | NIL | 292.44 | NIL | 318.43  | NIL | 332.42 | ON  | 295.04 | NIL | 358.47 |
| 4656 | ψSYMA | ?_SMA2327     | CD5 | 1297079 | 1299769 - | 30 | 30 | ON  | 283.88 | NIL | 277.32  | NIL | 311.67 | NIL | 311.39 | NIL | 357.37 |
| 4657 | ψSYMA | kDpC.SMA2329  | CD5 | 1299388 | 1300357 - | 30 | 30 | NIL | 342.2  | ON  | 366.49  | NIL | 352.58 | ON  | 357.2  | NIL | 359.43 |
| 4658 | ψSYMA | kDpB.SMA2331  | CD5 | 1300360 | 1302402 - | 30 | 30 | ON  | 417.13 | ON  | 432.32  | ON  | 435.98 | ON  | 333.87 | ON  | 389.47 |
| 4659 | ψSYMA | kDpA.SMA2333  | CD5 | 1304123 | 1304123 - | 30 | 30 | ON  | 344.4  | ON  | 363.44  | NIL | 320.28 | ON  | 371.26 | NIL | 319.23 |
| 4660 | ψSYMA | ?_SMA2335     | CD5 | 1304349 | 1304552 - | 30 | 30 | NIL | 222.47 | NIL | 238.05  | NIL | 276.19 | NIL | 217.05 | NIL | 273.91 |
| 4661 | ψSYMA | ?_SMA2337     | CD5 | 1304619 | 1306191 + | 30 | 30 | NIL | 259.12 | ON  | 601.71  | NIL | 369.88 | NIL | 281.64 | NIL | 345.37 |
| 4662 | ψSYMA | rhBA.SMA2400  | CD5 | 1306179 | 1307591 + | 30 | 30 | NIL | 284.67 | ON  | 1659.83 | ON  | 690.26 | ON  | 385.19 | NIL | 365.34 |
| 4663 | ψSYMA | rhBB.SMA2402  | CD5 | 1307588 | 1309075 + | 30 | 30 | NIL | 346.67 | ON  | 1245.15 | ON  | 596.65 | ON  | 367.02 | ON  | 401.68 |
| 4664 | ψSYMA | rhBC.SMA2404  | CD5 | 1309062 | 1310819 + | 30 | 30 | NIL | 279.21 | ON  | 1707.8  | ON  | 799.86 | ON  | 421.54 | NIL | 454.28 |
| 4665 | ψSYMA | rhBD.SMA2406  | CD5 | 1310812 | 1311402 + | 30 | 30 | NIL | 269.27 | ON  | 2989.29 | ON  | 991.66 | ON  | 346.63 | NIL | 364.03 |
| 4666 | ψSYMA | rhDE.SMA2408  | CD5 | 1311399 | 1312762 + | 30 | 30 | NIL | 319.88 | ON  | 1467    | ON  | 670.72 | ON  | 387.11 | ON  | 391.41 |
| 4667 | ψSYMA | rhE.SMA2410   | CD5 | 1312753 | 1314558 + | 30 | 30 | NIL | 279.61 | ON  | 2079.27 | ON  | 779.42 | ON  | 410.94 | ON  | 411.83 |
| 4668 | ψSYMA | rhA.SMA2412   | CD5 | 1314632 | 1314576 - | 30 | 30 | NIL | 263.67 | NIL | 320.02  | NIL | 307.38 | NIL | 276.17 | NIL | 278.16 |
| 4669 | ψSYMA | rhA.SMA2414   | CD5 | 1315745 | 1317985 + | 30 | 30 | NIL | 285.38 | ON  | 1376.35 | ON  | 670.67 | ON  | 451.2  | NIL | 392.26 |
| 4670 | ψSYMA | ?_SMA2339     | CD5 | 1317985 | 1319097 + | 30 | 30 | ON  | 318.01 | ON  | 611.58  | ON  | 403.94 | ON  | 343.32 | NIL | 372.31 |

|            |                 |     |         |           |    |    |     |         |     |        |     |        |     |        |     |         |
|------------|-----------------|-----|---------|-----------|----|----|-----|---------|-----|--------|-----|--------|-----|--------|-----|---------|
| 4671 pSyMB | ?_SMA2341       | CD5 | 1319286 | 1320173 - | 30 | 30 | ON  | 329.16  | ON  | 327.9  | NIL | 368.51 | NIL | 337.11 | NIL | 314.96  |
| 4672 pSyMB | ?_SMA2343       | CD5 | 1320285 | 1321007 + | 30 | 30 | ON  | 346.79  | ON  | 395.34 | NIL | 412.61 | ON  | 363.99 | ON  | 382.8   |
| 4673 pSyMB | ?_SMA2345       | CD5 | 1321074 | 1321646 - | 30 | 30 | ON  | 331.24  | ON  | 358.89 | NIL | 296.01 | NIL | 323.65 | NIL | 314.51  |
| 4674 pSyMB | ?_SMA2347       | CD5 | 1322021 | 1322758 - | 30 | 30 | ON  | 332.09  | NIL | 324.88 | ON  | 387.13 | ON  | 357.03 | NIL | 300.8   |
| 4675 pSyMB | ?_SMA2349       | CD5 | 1323061 | 1323708 + | 30 | 30 | NIL | 264.87  | NIL | 310.94 | NIL | 326.49 | NIL | 314.88 | NIL | 302.29  |
| 4676 pSyMB | ?_SMA2351       | CD5 | 1323705 | 1324655 + | 30 | 30 | ON  | 340.11  | ON  | 329.09 | NIL | 358.34 | ON  | 359.99 | NIL | 355.5   |
| 4677 pSyMB | ?_SMA2353       | CD5 | 1324657 | 1326858 + | 30 | 30 | ON  | 341.73  | ON  | 342.17 | ON  | 389.59 | ON  | 385.37 | ON  | 396.96  |
| 4678 pSyMB | ?_SMA2355       | CD5 | 1327012 | 1328151 + | 30 | 30 | NIL | 307.14  | ON  | 334.21 | NIL | 335.78 | NIL | 325.08 | NIL | 317.99  |
| 4679 pSyMB | ?_SMA2357       | CD5 | 1329990 | 1330670 + | 30 | 30 | NIL | 302.84  | ON  | 336.9  | NIL | 375.07 | NIL | 333.81 | NIL | 317.63  |
| 4680 pSyMB | ?_SMA2359       | CD5 | 1330682 | 1331458 + | 30 | 30 | NIL | 303.26  | NIL | 317.02 | NIL | 282.51 | NIL | 276.72 | ON  | 285.07  |
| 4681 pSyMB | ?_SMA2361       | CD5 | 1331764 | 1332750 + | 30 | 30 | ON  | 494.01  | ON  | 499.41 | ON  | 509.73 | ON  | 578.16 | ON  | 444.6   |
| 4682 pSyMB | ?_SMA2363       | CD5 | 1332762 | 1334177 + | 30 | 30 | ON  | 445.77  | ON  | 499.41 | ON  | 399.97 | ON  | 436.08 | NIL | 365.39  |
| 4683 pSyMB | ?_SMA2365       | CD5 | 1334174 | 1335700 + | 30 | 30 | ON  | 334.83  | NIL | 317.62 | NIL | 361.2  | NIL | 357.51 | NIL | 353.9   |
| 4684 pSyMB | ?_SMA2367       | CD5 | 1335690 | 1336739 + | 30 | 30 | ON  | 348.43  | ON  | 332.07 | NIL | 343.34 | NIL | 306.87 | NIL | 306.87  |
| 4685 pSyMB | ?_SMA2369       | CD5 | 1336736 | 1337680 + | 30 | 30 | ON  | 366.91  | ON  | 387.71 | NIL | 349.37 | ON  | 409.75 | NIL | 332.01  |
| 4686 pSyMB | ?_SMA2371       | CD5 | 1337702 | 1339000 + | 30 | 30 | ON  | 362.56  | ON  | 381.43 | NIL | 333.27 | ON  | 354.44 | NIL | 336.34  |
| 4687 pSyMB | ?_SMA2373       | CD5 | 1339874 | 1340281 + | 53 | 0  | ON  | 1070.49 | ON  | 692.65 | ON  | 573.47 | ON  | 644.76 | ON  | 558.42  |
| 4688 pSyMB | ?_SMA2375       | CD5 | 1340347 | 1340820 + | 53 | 0  | ON  | 371.95  | ON  | 325.94 | NIL | 295.13 | ON  | 362.8  | ON  | 520.16  |
| 4689 pSyMB | ?_SMA2377       | CD5 | 1341022 | 1342191 + | 30 | 30 | NIL | 298.98  | NIL | 308.81 | NIL | 328.97 | NIL | 312.99 | ON  | 305.14  |
| 4690 pSyMB | ?_SMA2379       | CD5 | 1342882 | 1344465 - | 30 | 30 | NIL | 389.94  | ON  | 404    | ON  | 400.29 | ON  | 499.07 | ON  | 445.49  |
| 4691 pSyMB | ?_SMA2381       | CD5 | 1344998 | 1345471 + | 30 | 30 | NIL | 264.07  | NIL | 265.7  | NIL | 312.15 | NIL | 305.85 | NIL | 333     |
| 4692 pSyMB | ?_SMA2383       | CD5 | 1345525 | 1346493 + | 30 | 30 | ON  | 341.12  | NIL | 295.99 | NIL | 330.66 | NIL | 313.45 | NIL | 370.23  |
| 4693 pSyMB | ?_SMA2385       | CD5 | 1346715 | 1348304 - | 30 | 30 | ON  | 331.59  | NIL | 312.56 | NIL | 347.77 | NIL | 334.56 | NIL | 317.96  |
| 4694 pSyMB | ?_SMA2387       | CD5 | 1348415 | 1349071 + | 30 | 30 | ON  | 324.08  | ON  | 343.25 | NIL | 351.96 | NIL | 308.19 | NIL | 312.96  |
| 4695 pSyMB | ?_SMA2391       | CD5 | 1349280 | 1349813 - | 30 | 30 | NIL | 278.51  | NIL | 275.07 | NIL | 283.34 | NIL | 291.6  | NIL | 351.42  |
| 4696 pSyMB | repC2_SMA2391   | CD5 | 1350001 | 1351206 - | 30 | 30 | NIL | 367.39  | ON  | 331.27 | ON  | 398.07 | ON  | 349.67 | NIL | 330.29  |
| 4697 pSyMB | repB2_SMA2393   | CD5 | 1351362 | 1352375 - | 31 | 31 | ON  | 358.95  | NIL | 309.5  | NIL | 300.9  | NIL | 300.06 | ON  | 334.61  |
| 4698 pSyMB | repA2_SMA2395   | CD5 | 1352360 | 1353535 - | 30 | 30 | ON  | 399.23  | ON  | 405.5  | NIL | 322.64 | NIL | 305.3  | ON  | 396.55  |
| 4699 pSyMB | lncE_SMA21652   | CD5 | 1       | 1275 +    | 30 | 30 | ON  | 332.35  | ON  | 300.59 | NIL | 357.82 | ON  | 493.35 | NIL | 302.89  |
| 4700 pSyMB | lncG_SMA21653   | CD5 | 1369    | 2265 +    | 30 | 30 | NIL | 295.43  | NIL | 266.79 | NIL | 306.08 | NIL | 316.12 | NIL | 263.22  |
| 4701 pSyMB | lncG_SMA21654   | CD5 | 2262    | 3080 +    | 30 | 30 | NIL | 279.67  | NIL | 294.15 | NIL | 332.27 | NIL | 315.94 | NIL | 2299.84 |
| 4702 pSyMB | lncI1_SMA21655  | CD5 | 3086    | 5353 +    | 30 | 30 | ON  | 342.2   | ON  | 375.18 | NIL | 341.5  | ON  | 379.04 | NIL | 311.48  |
| 4703 pSyMB | lncI1_SMA21655  | CD5 | 5350    | 6426 +    | 30 | 30 | ON  | 341.46  | ON  | 355.08 | NIL | 344.97 | ON  | 344.63 | NIL | 305.02  |
| 4704 pSyMB | ?_SMA2003       | CD5 | 6485    | 7261 +    | 30 | 30 | ON  | 478.03  | ON  | 357.61 | NIL | 371.61 | ON  | 415.17 | NIL | 379.02  |
| 4705 pSyMB | gSTR_SMB20004   | CD5 | 7268    | 8173 +    | 30 | 30 | ON  | 290.06  | NIL | 289.52 | NIL | 335.19 | NIL | 327.6  | NIL | 330.41  |
| 4706 pSyMB | gSTR_SMB20005   | CD5 | 8289    | 8900 +    | 30 | 30 | NIL | 326.62  | NIL | 325.83 | NIL | 291.6  | NIL | 295.67 | NIL | 298.6   |
| 4707 pSyMB | catG_SMB20007   | CD5 | 9086    | 10039 +   | 30 | 30 | ON  | 329.92  | ON  | 348.86 | ON  | 385.02 | ON  | 356.7  | NIL | 316.31  |
| 4708 pSyMB | ?_SMA20006      | CD5 | 10154   | 12271 +   | 30 | 30 | ON  | 356.72  | NIL | 299.27 | NIL | 349.13 | NIL | 320.74 | NIL | 340.59  |
| 4709 pSyMB | ?_SMA20008      | CD5 | 12297   | 13351 +   | 31 | 31 | ON  | 383.15  | ON  | 455.35 | ON  | 385.17 | NIL | 386.51 | NIL | 311.31  |
| 4710 pSyMB | ?_SMA20010      | CD5 | 14375   | 15442 +   | 30 | 30 | ON  | 352.03  | ON  | 349.1  | ON  | 439.15 | ON  | 413.23 | ON  | 379.94  |
| 4711 pSyMB | ?_SMA20011      | CD5 | 15669   | 16448 +   | 30 | 30 | ON  | 413.16  | ON  | 375.81 | NIL | 378.69 | ON  | 345.2  | ON  | 390.86  |
| 4712 pSyMB | ?_SMA20012      | CD5 | 16480   | 19023 -   | 30 | 30 | ON  | 357.94  | ON  | 367.46 | NIL | 337.57 | ON  | 340.99 | ON  | 368.5   |
| 4713 pSyMB | ?_SMA20013      | CD5 | 19079   | 20323 -   | 30 | 30 | ON  | 479.45  | ON  | 387.46 | ON  | 480.49 | ON  | 479.55 | ON  | 400.48  |
| 4714 pSyMB | ?_SMA20014      | CD5 | 20377   | 21378 -   | 30 | 30 | ON  | 339.81  | NIL | 316.09 | NIL | 445.16 | ON  | 323.1  | NIL | 343.48  |
| 4715 pSyMB | ?_SMA20015      | CD5 | 21392   | 22348 -   | 30 | 30 | ON  | 411.11  | ON  | 389.54 | ON  | 445.16 | ON  | 373.63 | NIL | 367.13  |
| 4716 pSyMB | ?_SMA20016      | CD5 | 22345   | 22337 -   | 30 | 30 | ON  | 382.1   | NIL | 319.09 | NIL | 306.07 | NIL | 304.23 | NIL | 275.4   |
| 4717 pSyMB | ?_SMA20017      | CD5 | 22337   | 24842 -   | 30 | 30 | ON  | 321     | ON  | 387.63 | NIL | 356.72 | ON  | 369.92 | NIL | 346.85  |
| 4718 pSyMB | ?_SMA20018      | CD5 | 22345   | 26114 -   | 30 | 30 | ON  | 399.84  | ON  | 386.11 | NIL | 332.22 | ON  | 405.73 | NIL | 320.02  |
| 4719 pSyMB | subC-2_SMB20019 | CD5 | 25092   | 27342 -   | 30 | 30 | ON  | 410.41  | NIL | 298.71 | NIL | 373.56 | NIL | 322.6  | NIL | 357.78  |
| 4720 pSyMB | pdh_SMB20020    | CD5 | 26206   | 29423 -   | 30 | 30 | ON  | 560.14  | NIL | 298.98 | NIL | 366.64 | ON  | 382.68 | NIL | 354.76  |
| 4721 pSyMB | ?_SMA20021      | CD5 | 27345   | 30010 +   | 30 | 30 | NIL | 282.84  | NIL | 279.5  | NIL | 332.52 | NIL | 291.97 | NIL | 316.05  |
| 4722 pSyMB | ?_SMA20022      | CD5 | 30658   | 31224 +   | 30 | 30 | ON  | 391.82  | ON  | 411.27 | ON  | 464.32 | ON  | 419.76 | ON  | 426.16  |
| 4723 pSyMB | ?_SMA20023      | CD5 | 31301   | 34918 -   | 30 | 30 | ON  | 364.81  | ON  | 376.59 | ON  | 395.18 | ON  | 394.72 | ON  | 388.82  |
| 4724 pSyMB | ?_SMA20024      | CD5 | 34935   | 35897 +   | 30 | 30 | ON  | 331.39  | ON  | 325.96 | NIL | 333.08 | ON  | 355.59 | NIL | 351.26  |
| 4725 pSyMB | ?_SMA20025      | CD5 | 36147   | 37172 +   | 30 | 30 | ON  | 349.27  | ON  | 628.04 | ON  | 392.7  | ON  | 883.85 | NIL | 392.41  |
| 4726 pSyMB | ?_SMA20026      | CD5 | 37331   | 37792 +   | 30 | 30 | ON  | 341.19  | ON  | 422.83 | NIL | 355.4  | ON  | 422.67 | NIL | 319.72  |
| 4727 pSyMB | ?_SMA20027      | CD5 | 37805   | 39310 +   | 30 | 30 | ON  | 346.78  | ON  | 463.25 | NIL | 327.01 | ON  | 484.64 | NIL | 303.47  |
| 4728 pSyMB | ?_SMA20028      | CD5 | 39374   | 40510 -   | 30 | 30 | NIL | 380.28  | NIL | 320.94 | NIL | 295.85 | NIL | 316.4  | NIL | 331.44  |
| 4729 pSyMB | sig_SMB20030    | CD5 | 40950   | 41423 +   | 30 | 30 | NIL | 304.05  | ON  | 326.36 | NIL | 358.93 | NIL | 337.36 | ON  | 321.93  |
| 4730 pSyMB | ?_SMA20029      | CD5 | 41423   | 42280 +   | 30 | 30 | ON  | 376.27  | ON  | 375.92 | ON  | 404    | ON  | 371.39 | ON  | 391.6   |
| 4731 pSyMB | ?_SMA20031      | CD5 | 42306   | 42554 -   | 30 | 30 | NIL | 265.58  | NIL | 266.58 | NIL | 334.5  | ON  | 326.16 | ON  | 331.44  |
| 4732 pSyMB | ?_SMA20032      | CD5 | 42651   | 43385 -   | 30 | 30 | ON  | 352.97  | ON  | 367.28 | ON  | 299.3  | ON  | 427.32 | ON  | 399.9   |
| 4733 pSyMB | ?_SMA20033      | CD5 | 43775   | 44437 -   | 30 | 30 | NIL | 359.63  | ON  | 332.5  | NIL | 263.59 | NIL | 318.04 | NIL | 311.33  |
| 4734 pSyMB | ?_SMA20034      | CD5 | 44734   | 45297 +   | 30 | 30 | NIL | 257.09  | NIL | 367.3  | NIL | 293.71 | NIL | 271.52 | NIL | 303.21  |
| 4735 pSyMB | ?_SMA20035      | CD5 | 45308   | 46588 +   | 30 | 30 | NIL | 276.88  | NIL | 326.2  | NIL | 302.46 | NIL | 293.11 | NIL | 290.84  |
| 4736 pSyMB | ?_SMA20036      | CD5 | 46649   | 47665 +   | 30 | 30 | NIL | 277.38  | NIL | 270.34 | NIL | 296.91 | NIL | 284.89 | NIL | 294.74  |
| 4737 pSyMB | broE2_SMB20037  | CD5 | 47745   | 48603 +   | 30 | 30 | NIL | 348.54  | ON  | 343.15 | NIL | 360.01 | ON  | 389.84 | NIL | 366.29  |
| 4738 pSyMB | ?_SMA20038      | CD5 | 48822   | 49049 +   | 30 | 30 | ON  | 353.71  | ON  | 334.44 | ON  | 532.83 | ON  | 455.33 | ON  | 419.27  |
| 4739 pSyMB | ?_SMA20039      | CD5 | 49146   | 50570 -   | 30 | 30 | ON  | 311.36  | ON  | 341.76 | ON  | 377.68 | ON  | 386.92 | ON  | 374.55  |
| 4740 pSyMB | ?_SMA20040      | CD5 | 50652   | 51512 +   | 30 | 30 | ON  | 346.21  | ON  | 338.06 | NIL | 340.95 | ON  | 365.26 | NIL | 344.31  |
| 4741 pSyMB | ?_SMA20041      | CD5 | 51703   | 52233 +   | 30 | 30 | NIL | 290.01  | ON  | 348.96 | NIL | 356.83 | ON  | 335.75 | NIL | 349.78  |

|      |       |                  |     |       |         |    |    |     |         |     |        |     |        |     |        |     |        |     |
|------|-------|------------------|-----|-------|---------|----|----|-----|---------|-----|--------|-----|--------|-----|--------|-----|--------|-----|
| 4743 | psymb | 7: SMB20042      | CDS | 52256 | 53413 - | 30 | 30 | ON  | 394.87  | ON  | 361.9  | ON  | 386.16 | ON  | 389.81 | ON  | 381.12 | ON  |
| 4744 | psymb | 7: SMB20043      | CDS | 53787 | 54629 + | 30 | 30 | ON  | 416.39  | ON  | 363.41 | ON  | 382.13 | ON  | 398.06 | ON  | 406.2  | ON  |
| 4745 | psymb | repB1: SMB20044  | CDS | 55090 | 55400 - | 30 | 30 | NIL | 308.69  | NIL | 314.27 | NIL | 308.76 | NIL | 309.5  | NIL | 327.23 | NIL |
| 4746 | psymb | repB1: SMB20045  | CDS | 55656 | 57560 - | 30 | 30 | ON  | 351.54  | ON  | 388.87 | NIL | 338.87 | ON  | 339.13 | ON  | 341.5  | ON  |
| 4747 | psymb | repA1: SMB20046  | CDS | 57564 | 58760 - | 30 | 30 | ON  | 456.82  | ON  | 485.03 | ON  | 384.3  | ON  | 363.01 | NIL | 343.01 | ON  |
| 4748 | psymb | 7: SMB20047      | CDS | 59127 | 59315 + | 30 | 30 | ON  | 625.36  | ON  | 711.77 | ON  | 489.67 | ON  | 624.39 | ON  | 592.57 | ON  |
| 4749 | psymb | 7: SMB20048      | CDS | 59484 | 60191 + | 30 | 30 | ON  | 385.41  | ON  | 406.13 | ON  | 348.45 | ON  | 355.17 | NIL | 356.77 | ON  |
| 4750 | psymb | hsa22: SMB20049  | CDS | 60310 | 62271 + | 30 | 30 | ON  | 320.14  | ON  | 320.14 | NIL | 310.78 | NIL | 325.09 | NIL | 286.62 | ON  |
| 4751 | psymb | cpo: SMB20050    | CDS | 62415 | 62924 - | 30 | 30 | ON  | 328.59  | ON  | 354.52 | ON  | 300.82 | NIL | 321.92 | NIL | 355.36 | ON  |
| 4752 | psymb | cpo: SMB20054    | CDS | 63020 | 63847 - | 30 | 30 | NIL | 292.81  | ON  | 326.47 | ON  | 364.56 | NIL | 331.2  | NIL | 341.44 | ON  |
| 4753 | psymb | 7: SMB20055      | CDS | 63995 | 64984 + | 30 | 30 | ON  | 338.74  | ON  | 356.25 | NIL | 342.84 | ON  | 341.24 | NIL | 367.46 | ON  |
| 4754 | psymb | 7: SMB20056      | CDS | 66644 | 67711 + | 30 | 30 | ON  | 1798.28 | ON  | 362.05 | NIL | 362.05 | NIL | 341.84 | NIL | 338.22 | ON  |
| 4755 | psymb | 7: SMB20057      | CDS | 67708 | 68751 + | 30 | 30 | ON  | 916.9   | NIL | 301.7  | NIL | 297.52 | ON  | 329.52 | NIL | 296.38 | ON  |
| 4756 | psymb | 7: SMB20058      | CDS | 68748 | 69548 + | 30 | 30 | ON  | 782.12  | ON  | 337.68 | ON  | 429.9  | ON  | 370.28 | NIL | 312.42 | ON  |
| 4757 | psymb | 7: SMB20059      | CDS | 69552 | 70331 + | 30 | 30 | ON  | 702.25  | ON  | 702.25 | ON  | 452.48 | ON  | 402.99 | ON  | 418.12 | ON  |
| 4758 | psymb | Trms-6: SMB20060 | CDS | 72259 | 72414 + | 76 | 0  | NIL | 252.93  | NIL | 251.81 | ON  | 273.29 | ON  | 312.55 | ON  | 312.55 | ON  |
| 4759 | psymb | 7: SMB20061      | CDS | 72518 | 72756 + | 30 | 30 | NIL | 290.33  | NIL | 316.64 | NIL | 279.08 | NIL | 336.39 | NIL | 330.67 | ON  |
| 4760 | psymb | 7: SMB20062      | CDS | 72518 | 73052 - | 31 | 31 | NIL | 382.1   | NIL | 402.76 | ON  | 395.72 | ON  | 394.96 | NIL | 330.07 | ON  |
| 4761 | psymb | 7: SMB20063      | CDS | 72516 | 73052 - | 35 | 28 | NIL | 266.8   | ON  | 381.41 | NIL | 381.41 | NIL | 315.63 | ON  | 315.63 | ON  |
| 4762 | psymb | 7: SMB20064      | CDS | 72974 | 74320 + | 30 | 30 | ON  | 341.26  | ON  | 381.12 | ON  | 299.26 | ON  | 407.78 | ON  | 408.11 | ON  |
| 4763 | psymb | 7: SMB20065      | CDS | 73972 | 74722 + | 30 | 30 | ON  | 382.73  | ON  | 412.84 | ON  | 558.36 | ON  | 541.01 | ON  | 417.52 | ON  |
| 4764 | psymb | 7: SMB20066      | CDS | 74537 | 75247 - | 30 | 30 | ON  | 382.73  | ON  | 315.19 | ON  | 411.77 | ON  | 361.83 | ON  | 381.22 | ON  |
| 4765 | psymb | 7: SMB20067      | CDS | 74726 | 75671 + | 30 | 30 | NIL | 334     | NIL | 347.36 | NIL | 377.32 | ON  | 342.79 | NIL | 323.42 | ON  |
| 4766 | psymb | 7: SMB20068      | CDS | 75462 | 77608 + | 30 | 30 | ON  | 549.69  | ON  | 423.72 | NIL | 413.7  | ON  | 460.77 | ON  | 400.77 | ON  |
| 4767 | psymb | 7: SMB20069      | CDS | 76205 | 77608 + | 30 | 30 | ON  | 398.4   | ON  | 374.23 | NIL | 358.6  | ON  | 358.08 |     |        |     |

|            |                  |     |        |        |   |    |    |    |     |        |     |        |     |        |     |        |     |        |
|------------|------------------|-----|--------|--------|---|----|----|----|-----|--------|-----|--------|-----|--------|-----|--------|-----|--------|
| 4815 pSyMB | ?_SMB20117       | CD5 | 130586 | 131686 | - | 30 | 30 | 30 | ON  | 382.34 | ON  | 383.96 | NIL | 334.17 | NIL | 323.45 | NIL | 296.54 |
| 4816 pSyMB | ?_SMB20118       | CD5 | 132167 | 132586 | - | 30 | 30 | 30 | NIL | 282.6  | ON  | 314.61 | NIL | 302.35 | NIL | 307.8  | NIL | 300.96 |
| 4817 pSyMB | ?_SMB20119       | CD5 | 132609 | 132965 | - | 30 | 30 | 30 | NIL | 358.37 | ON  | 346.81 | NIL | 340.24 | ON  | 385.37 | ON  | 380.19 |
| 4818 pSyMB | ?_SMB20120       | CD5 | 132964 | 133272 | + | 30 | 30 | 30 | NIL | 301.67 | NIL | 312.03 | NIL | 321.11 | NIL | 315.06 | NIL | 284.22 |
| 4819 pSyMB | ?_SMB20121       | CD5 | 133283 | 133586 | - | 30 | 30 | 30 | ON  | 360.14 | ON  | 417.71 | NIL | 344.06 | ON  | 366.96 | NIL | 357.13 |
| 4820 pSyMB | ?_SMB20122       | CD5 | 133740 | 134075 | - | 30 | 30 | 30 | NIL | 241.88 | NIL | 276.53 | NIL | 219.66 | NIL | 237.79 | NIL | 281.11 |
| 4821 pSyMB | ?_SMB20123       | CD5 | 134261 | 135157 | - | 30 | 30 | 30 | NIL | 314.93 | NIL | 321.12 | NIL | 340.66 | NIL | 328.15 | NIL | 315.43 |
| 4822 pSyMB | ?_SMB20124       | CD5 | 135279 | 136805 | - | 30 | 30 | 30 | NIL | 283.56 | NIL | 285.56 | NIL | 342.02 | NIL | 335.66 | NIL | 327.49 |
| 4823 pSyMB | ?_SMB20125       | CD5 | 136815 | 137747 | - | 30 | 30 | 30 | NIL | 294.11 | ON  | 294.11 | ON  | 342.02 | NIL | 308.05 | NIL | 338.67 |
| 4824 pSyMB | ?_SMB20126       | CD5 | 137756 | 139853 | - | 30 | 30 | 30 | NIL | 294.79 | ON  | 332.57 | NIL | 329.77 | NIL | 301.07 | ON  | 311.12 |
| 4825 pSyMB | ?_SMB20127       | CD5 | 139906 | 139986 | - | 30 | 30 | 30 | NIL | 297.03 | ON  | 332.57 | NIL | 374.08 | NIL | 334.71 | ON  | 408.53 |
| 4826 pSyMB | ?_SMB20128       | CD5 | 140042 | 141355 | - | 30 | 30 | 30 | NIL | 412.2  | ON  | 407.11 | ON  | 424.15 | ON  | 376.89 | ON  | 380.33 |
| 4827 pSyMB | ?_SMB20129       | CD5 | 141805 | 142584 | + | 30 | 30 | 30 | ON  | 360.41 | ON  | 327.16 | ON  | 491.55 | ON  | 426.18 | NIL | 362.95 |
| 4828 pSyMB | ?_SMB20130       | CD5 | 142635 | 143498 | + | 30 | 30 | 30 | ON  | 388.82 | ON  | 357.48 | ON  | 406.99 | ON  | 455.32 | NIL | 334.66 |
| 4829 pSyMB | ?_SMB20131       | CD5 | 143495 | 143980 | + | 30 | 30 | 30 | ON  | 417.73 | ON  | 393.44 | ON  | 524.98 | ON  | 486.84 | ON  | 436.05 |
| 4830 pSyMB | ?_SMB20132       | CD5 | 143977 | 146295 | + | 30 | 30 | 30 | NIL | 305.11 | NIL | 315.4  | ON  | 385.55 | ON  | 375.91 | NIL | 372.89 |
| 4831 pSyMB | ?_SMB20133       | CD5 | 146295 | 147344 | + | 30 | 30 | 30 | NIL | 290.31 | NIL | 293.84 | NIL | 308.97 | NIL | 312.63 | NIL | 270.02 |
| 4832 pSyMB | ?_SMB20134       | CD5 | 147547 | 148938 | - | 30 | 30 | 30 | ON  | 307.38 | ON  | 347.32 | NIL | 354.6  | ON  | 353.31 | ON  | 389.16 |
| 4833 pSyMB | ?_SMB20135       | CD5 | 149017 | 149649 | - | 30 | 30 | 30 | ON  | 312.87 | ON  | 333.95 | NIL | 342.5  | NIL | 329.23 | NIL | 342.55 |
| 4834 pSyMB | ?_SMB20136       | CD5 | 149680 | 151053 | - | 30 | 30 | 30 | ON  | 323.17 | NIL | 333.99 | NIL | 324.44 | NIL | 319.64 | NIL | 323.98 |
| 4835 pSyMB | ?_SMB20137       | CD5 | 151195 | 152136 | - | 30 | 30 | 30 | NIL | 258.97 | NIL | 265.25 | NIL | 322.85 | NIL | 278.15 | NIL | 325.17 |
| 4836 pSyMB | ?_SMB20138       | CD5 | 153102 | 153102 | - | 30 | 30 | 30 | NIL | 314.29 | NIL | 317.54 | NIL | 308.42 | NIL | 310.17 | NIL | 329.17 |
| 4837 pSyMB | ?_SMB20139       | CD5 | 153414 | 153908 | + | 30 | 30 | 30 | NIL | 267.09 | NIL | 265.27 | NIL | 270.02 | NIL | 279.88 | NIL | 317.29 |
| 4838 pSyMB | dapa2.SMB20140   | CD5 | 153928 | 154809 | - | 30 | 30 | 30 | NIL | 317.29 | ON  | 382.04 | NIL | 322.97 | ON  | 377.67 | NIL | 330.97 |
| 4839 pSyMB | ?_SMB20141       | CD5 | 154809 | 156485 | - | 31 | 31 | 30 | ON  | 338.22 | ON  | 365.82 | NIL | 361.47 | ON  | 364.93 | ON  | 398.54 |
| 4840 pSyMB | ?_SMB20142       | CD5 | 156448 | 157371 | - | 30 | 30 | 30 | NIL | 316.87 | ON  | 344.81 | NIL | 289.04 | NIL | 317.41 | NIL | 298.73 |
| 4841 pSyMB | ?_SMB20143       | CD5 | 157386 | 158300 | - | 30 | 30 | 30 | NIL | 272.15 | NIL | 293    | NIL | 271.1  | NIL | 313.56 | NIL | 350.26 |
| 4842 pSyMB | ?_SMB20144       | CD5 | 158386 | 159891 | - | 30 | 30 | 30 | ON  | 325.53 | ON  | 378.21 | NIL | 356.86 | ON  | 466.73 | NIL | 419.62 |
| 4843 pSyMB | ?_SMB20145       | CD5 | 160206 | 161393 | + | 30 | 30 | 30 | ON  | 353.01 | ON  | 428.86 | ON  | 379.3  | ON  | 396.85 | ON  | 468.68 |
| 4844 pSyMB | pdxA2-2.SMB20146 | CD5 | 161393 | 162358 | + | 30 | 30 | 30 | ON  | 351.81 | ON  | 416.57 | ON  | 434.02 | ON  | 359.64 | NIL | 481.46 |
| 4845 pSyMB | ?_SMB20147       | CD5 | 162355 | 163461 | + | 30 | 30 | 30 | ON  | 356.46 | ON  | 411.39 | NIL | 458.66 | ON  | 400.9  | NIL | 370.88 |
| 4846 pSyMB | ?_SMB20148       | CD5 | 163866 | 164387 | - | 30 | 30 | 30 | ON  | 457.25 | ON  | 530.49 | ON  | 458.66 | ON  | 468.68 | NIL | 418.44 |
| 4847 pSyMB | ?_SMB20149       | CD5 | 164391 | 165422 | - | 30 | 30 | 30 | NIL | 374.28 | ON  | 381.11 | ON  | 474.2  | NIL | 448.68 | ON  | 402.16 |
| 4848 pSyMB | ?_SMB20150       | CD5 | 165740 | 166579 | + | 30 | 30 | 30 | NIL | 298.45 | NIL | 297.13 | NIL | 335.12 | NIL | 301.84 | NIL | 321.33 |
| 4849 pSyMB | ?_SMB20151       | CD5 | 166645 | 167262 | + | 30 | 30 | 30 | NIL | 326.9  | ON  | 322.83 | ON  | 373.38 | NIL | 352.1  | NIL | 328.47 |
| 4850 pSyMB | ?_SMB20152       | CD5 | 169568 | 169874 | + | 30 | 30 | 30 | ON  | 327.39 | ON  | 422.11 | NIL | 316.34 | NIL | 317.48 | NIL | 331.3  |
| 4851 pSyMB | ?_SMB20153       | CD5 | 170701 | 170701 | + | 30 | 30 | 30 | ON  | 341.07 | NIL | 304.4  | NIL | 317.48 | NIL | 322.55 | NIL | 333.82 |
| 4852 pSyMB | ?_SMB20154       | CD5 | 170752 | 171738 | - | 30 | 30 | 30 | ON  | 403.84 | ON  | 378.52 | NIL | 356.77 | NIL | 342.05 | NIL | 333.82 |
| 4853 pSyMB | ?_SMB20155       | CD5 | 172249 | 174099 | + | 30 | 30 | 30 | ON  | 319.66 | ON  | 366.91 | NIL | 291.05 | NIL | 334.89 | NIL | 303.02 |
| 4854 pSyMB | ?_SMB20156       | CD5 | 174099 | 175232 | + | 30 | 30 | 30 | NIL | 304.57 | ON  | 336.74 | ON  | 427.53 | NIL | 372.19 | NIL | 287.56 |
| 4855 pSyMB | ?_SMB20157       | CD5 | 175232 | 176398 | + | 30 | 30 | 30 | NIL | 306.71 | NIL | 314.05 | NIL | 359.56 | ON  | 322.93 | NIL | 381.04 |
| 4856 pSyMB | ?_SMB20158       | CD5 | 176427 | 177551 | + | 30 | 30 | 30 | NIL | 277.85 | NIL | 282.31 | NIL | 322.93 | NIL | 297.38 | NIL | 318.84 |
| 4857 pSyMB | ?_SMB20159       | CD5 | 177605 | 179489 | + | 30 | 30 | 30 | ON  | 347.46 | NIL | 312.68 | ON  | 392.25 | ON  | 364.87 | NIL | 344.16 |
| 4858 pSyMB | ?_SMB20160       | CD5 | 178551 | 179683 | + | 30 | 30 | 30 | NIL | 295.03 | NIL | 320.83 | NIL | 305.54 | ON  | 349.66 | NIL | 352.84 |
| 4859 pSyMB | ?_SMB20161       | CD5 | 179533 | 180766 | + | 30 | 30 | 30 | NIL | 237.79 | NIL | 244.93 | NIL | 290.08 | NIL | 278.14 | NIL | 268.97 |
| 4860 pSyMB | ?_SMB20162       | CD5 | 180077 | 181980 | + | 30 | 30 | 30 | NIL | 294.28 | NIL | 303.39 | NIL | 311.96 | NIL | 393.37 | NIL | 276.15 |
| 4861 pSyMB | ?_SMB20163       | CD5 | 180811 | 181977 | + | 30 | 30 | 30 | NIL | 345.35 | ON  | 354.64 | NIL | 322.2  | ON  | 380.29 | NIL | 346.81 |
| 4862 pSyMB | ?_SMB20164       | CD5 | 181977 | 184220 | + | 30 | 30 | 30 | NIL | 303.27 | NIL | 289.95 | NIL | 349.22 | ON  | 337.38 | NIL | 297.96 |
| 4863 pSyMB | ?_SMB20165       | CD5 | 184327 | 184998 | + | 30 | 30 | 30 | NIL | 354.52 | ON  | 347.16 | ON  | 379.86 | NIL | 334.38 | NIL | 345.96 |
| 4864 pSyMB | ?_SMB20166       | CD5 | 184995 | 185348 | + | 30 | 30 | 30 | NIL | 299.63 | ON  | 341.09 | ON  | 397.06 | ON  | 339.45 | NIL | 343.5  |
| 4865 pSyMB | ?_SMB20167       | CD5 | 185422 | 186234 | - | 30 | 30 | 30 | NIL | 369.9  | ON  | 463.29 | ON  | 393.64 | ON  | 417.65 | ON  | 385.46 |
| 4866 pSyMB | ?_SMB20168       | CD5 | 186369 | 187466 | + | 30 | 30 | 30 | ON  | 313.56 | ON  | 362.47 | NIL | 342.93 | NIL | 355.67 | NIL | 323.84 |
| 4867 pSyMB | ?_SMB20169       | CD5 | 187595 | 188236 | - | 30 | 30 | 30 | ON  | 347.8  | ON  | 339.23 | NIL | 326.28 | NIL | 333.54 | NIL | 319.97 |
| 4868 pSyMB | fnh.SMB20170     | CD5 | 188406 | 189533 | + | 37 | 5  | 30 | ON  | 882.68 | ON  | 600.62 | ON  | 540.49 | ON  | 617.07 | ON  | 410.99 |
| 4869 pSyMB | ?_SMB20171       | CD5 | 189542 | 190372 | + | 30 | 30 | 30 | ON  | 341.12 | NIL | 290.24 | NIL | 289.7  | NIL | 306.29 | NIL | 325.31 |
| 4870 pSyMB | ?_SMB20172       | CD5 | 190386 | 190796 | + | 30 | 30 | 30 | ON  | 405.55 | NIL | 322.33 | NIL | 312.14 | ON  | 370.98 | NIL | 313.71 |
| 4871 pSyMB | ?_SMB20173       | CD5 | 190974 | 192779 | + | 30 | 30 | 30 | ON  | 373    | NIL | 300.57 | NIL | 354.02 | ON  | 378.1  | NIL | 308.9  |
| 4872 pSyMB | ?_SMB20174       | CD5 | 192858 | 193388 | + | 30 | 30 | 30 | ON  | 353.13 | NIL | 317.71 | NIL | 313.7  | NIL | 336.28 | NIL | 306.78 |
| 4873 pSyMB | ?_SMB20175       | CD5 | 194211 | 194211 | + | 30 | 30 | 30 | ON  | 315.64 | ON  | 315.21 | ON  | 398.95 | NIL | 331.4  | NIL | 309.87 |
| 4874 pSyMB | ?_SMB20176       | CD5 | 194208 | 194753 | + | 30 | 30 | 30 | ON  | 340.4  | ON  | 327.24 | NIL | 375.76 | NIL | 350.37 | NIL | 332.17 |
| 4875 pSyMB | ?_SMB20177       | CD5 | 194927 | 195448 | - | 30 | 30 | 30 | ON  | 372.35 | NIL | 317.9  | ON  | 397.63 | NIL | 315.15 | NIL | 367.13 |
| 4876 pSyMB | ?_SMB20178       | CD5 | 195575 | 196762 | + | 30 | 30 | 30 | ON  | 326.6  | NIL | 310.77 | NIL | 299.27 | NIL | 320.61 | NIL | 337.32 |
| 4877 pSyMB | ?_SMB20179       | CD5 | 196764 | 197738 | + | 30 | 30 | 30 | NIL | 292.64 | NIL | 270.1  | NIL | 306.6  | NIL | 291.12 | NIL | 302.62 |
| 4878 pSyMB | ?_SMB20180       | CD5 | 197742 | 198221 | + | 30 | 30 | 30 | NIL | 252.67 | ON  | 278.63 | NIL | 279.26 | NIL | 288.75 | NIL | 315.12 |
| 4879 pSyMB | ?_SMB20181       | CD5 | 198276 | 199247 | + | 33 | 33 | 33 | NIL | 317.7  | ON  | 331.07 | NIL | 323.1  | NIL | 319.99 | NIL | 315.12 |
| 4880 pSyMB | ?_SMB20182       | CD5 | 199222 | 200001 | + | 31 | 31 | 31 | ON  | 313.25 | NIL | 295.78 | NIL | 320.13 | NIL | 330.85 | NIL | 328.27 |
| 4881 pSyMB | ?_SMB20183       | CD5 | 199998 | 200621 | + | 30 | 30 | 30 | ON  | 328.37 | ON  | 332.25 | NIL | 330.79 | NIL | 312.56 | NIL | 282.84 |
| 4882 pSyMB | ?_SMB20184       | CD5 | 200618 | 201346 | + | 30 | 30 | 30 | ON  | 380.54 | ON  | 345.37 | ON  | 406.72 | NIL | 381.53 | NIL | 320.86 |
| 4883 pSyMB | ?_SMB20185       | CD5 | 201343 | 202134 | + | 30 | 30 | 30 | NIL | 310.67 | NIL | 308.32 | NIL | 275.45 | NIL | 312.9  | NIL | 274.31 |
| 4884 pSyMB | ?_SMB20186       | CD5 | 202355 | 202824 | + | 30 | 30 | 30 | NIL | 307.16 | NIL | 308.32 | NIL | 339.3  | NIL | 377.17 | NIL | 363.52 |
| 4885 pSyMB | ?_SMB20187       | CD5 | 203172 | 203702 | - | 31 | 31 | 31 | ON  | 327.6  | ON  | 325.89 | NIL | 321.01 | NIL | 300.92 | NIL | 333.83 |
| 4886 pSyMB | ppe.SMB20195     | CD5 | 203706 | 204392 | - | 31 | 31 | 31 | ON  | 355.3  | ON  | 356.27 | NIL | 344.89 | ON  | 359.56 | NIL | 312.16 |

|            |                |     |        |   |        |   |    |    |     |        |        |     |        |     |        |     |        |
|------------|----------------|-----|--------|---|--------|---|----|----|-----|--------|--------|-----|--------|-----|--------|-----|--------|
| 4887 pSymb | cbhx: SMB20196 | CDS | 204389 | - | 205324 | - | 30 | 30 | ON  | 363.23 | 378.99 | ON  | 444.29 | ON  | 418.75 | ON  | 420.11 |
| 4888 pSymb | cbhx: SMB20197 | CDS | 205336 | - | 205725 | - | 30 | 30 | NIL | 287.63 | 301.46 | ON  | 390.63 | ON  | 396.63 | ON  | 326.62 |
| 4889 pSymb | cbhl: SMB20198 | CDS | 205760 | - | 207227 | - | 30 | 30 | ON  | 351.83 | 348.34 | ON  | 400.48 | ON  | 388.71 | ON  | 396.95 |
| 4890 pSymb | cbha: SMB20199 | CDS | 207260 | - | 208339 | - | 30 | 30 | ON  | 345.26 | 344.93 | NIL | 374.5  | NIL | 354.41 | NIL | 354.22 |
| 4891 pSymb | cbdt: SMB20200 | CDS | 208342 | - | 210426 | - | 30 | 30 | ON  | 379.96 | 421.2  | ON  | 439.76 | ON  | 453.5  | ON  | 451.85 |
| 4892 pSymb | cbdp: SMB20201 | CDS | 210437 | - | 213306 | - | 30 | 30 | NIL | 288.15 | 273.9  | NIL | 291.13 | NIL | 316.41 | NIL | 318.92 |
| 4893 pSymb | cbdf: SMB20202 | CDS | 213317 | - | 212366 | - | 30 | 30 | ON  | 326.03 | 326.41 | NIL | 376.94 | NIL | 325.38 | NIL | 331.66 |
| 4894 pSymb | cbhr: SMB20203 | CDS | 212468 | - | 213409 | - | 30 | 30 | ON  | 377.31 | 374.73 | NIL | 340.17 | ON  | 382.7  | NIL | 334.11 |
| 4895 pSymb | cbqa: SMB20204 | CDS | 213692 | - | 213787 | - | 30 | 30 | ON  | 462.11 | 948.32 | NIL | 278.26 | ON  | 767.22 | NIL | 347.01 |
| 4896 pSymb | cbqB: SMB20205 | CDS | 213829 | - | 214740 | - | 30 | 30 | NIL | 313.76 | 309.05 | NIL | 304.56 | NIL | 314.95 | NIL | 324.02 |
| 4897 pSymb | cbqC: SMB20206 | CDS | 214737 | - | 215507 | - | 30 | 30 | ON  | 330.5  | 342.62 | NIL | 347.43 | NIL | 300.62 | NIL | 347.57 |
| 4898 pSymb | cbqD: SMB20207 | CDS | 215504 | - | 215800 | - | 30 | 30 | ON  | 417.96 | 392.98 | ON  | 546.34 | ON  | 517.94 | ON  | 442.08 |
| 4899 pSymb | pbqE: SMB20208 | CDS | 215797 | - | 216924 | - | 30 | 30 | ON  | 349.6  | 390.24 | ON  | 422.2  | ON  | 414.16 | NIL | 362.55 |
| 4900 pSymb | psmb           | CDS | 216993 | - | 217232 | - | 30 | 30 | NIL | 284.58 | 307.18 | NIL | 315.67 | NIL | 315.84 | NIL | 295.08 |
| 4901 pSymb | psmb           | CDS | 217800 | - | 218000 | - | 30 | 30 | ON  | 337.46 | 328.42 | ON  | 387.91 | ON  | 369.96 | NIL | 367.83 |
| 4902 pSymb | psmb           | CDS | 218142 | - | 219074 | - | 30 | 30 | ON  | 323.29 | 344.41 | NIL | 370.4  | NIL | 330.72 | NIL | 323.32 |
| 4903 pSymb | psmb           | CDS | 219262 | - | 219942 | - | 30 | 30 | NIL | 305.49 | 347.19 | ON  | 412.91 | ON  | 363.29 | NIL | 377.66 |
| 4904 pSymb | psmb           | CDS | 219980 | - | 221863 | - | 30 | 30 | ON  | 375.26 | 350.05 | ON  | 435.1  | ON  | 344.73 | ON  | 385.78 |
| 4905 pSymb | psmb           | CDS | 222127 | - | 222930 | - | 30 | 30 | ON  | 317    | 348.69 | ON  | 378.14 | ON  | 396.06 | NIL | 372.69 |
| 4906 pSymb | psmb           | CDS | 222933 | - | 223973 | - | 30 | 30 | NIL | 293.84 | 294.68 | NIL | 329.51 | NIL | 331.58 | NIL | 334.31 |
| 4907 pSymb | psmb           | CDS | 225160 | - | 225160 | - | 30 | 30 | ON  | 340.82 | 338.51 | ON  | 381.74 | ON  | 356.58 | NIL | 351.15 |
| 4908 pSymb | psmb           | CDS | 225378 | - | 225378 | - | 30 | 30 | NIL | 306.24 | 287.88 | ON  | 412    | ON  | 335.51 | NIL | 352.11 |
| 4909 pSymb | psmb           | CDS | 226043 | - | 226043 | - | 30 | 30 | ON  | 355.78 | 390.89 | NIL | 346.39 | NIL | 328.13 | NIL | 332.27 |
| 4910 pSymb | psmb           | CDS | 226214 | - | 227578 | - | 30 | 30 | NIL | 304.04 | 339.02 | NIL | 288.87 | ON  | 294.62 | NIL | 300.21 |
| 4911 pSymb | psmb           | CDS | 227578 | - | 228315 | - | 30 | 30 | ON  | 320.43 | 307.97 | ON  | 393.63 | ON  | 381.61 | NIL | 362.44 |
| 4912 pSymb | psmb           | CDS | 228706 | - | 229740 | - | 30 | 30 | ON  | 318.94 | 364.49 | ON  | 430.9  | ON  | 372.09 | NIL | 332.03 |
| 4913 pSymb | psmb           | CDS | 229750 | - | 230160 | - | 30 | 30 | ON  | 462.47 | 378.65 | ON  | 507.4  | ON  | 558.22 | ON  | 443.52 |
| 4914 pSymb | psmb           | CDS | 230980 | - | 231105 | - | 30 | 30 | ON  | 313.12 | 331.07 | ON  | 402.9  | NIL | 320.59 | NIL | 334.96 |
| 4915 pSymb | psmb           | CDS | 231657 | - | 232343 | - | 30 | 30 | NIL | 249.99 | 250.68 | NIL | 271.37 | NIL | 246.76 | NIL | 297.89 |
| 4916 pSymb | psmb           | CDS | 232509 | - | 232682 | - | 30 | 30 | NIL | 304.07 | 323.37 | ON  | 422.34 | NIL | 357.27 | NIL | 367.33 |
| 4917 pSymb | psmb           | CDS | 232839 | - | 233417 | - | 30 | 30 | NIL | 297.51 | 346.66 | NIL | 285.88 | NIL | 289.5  | NIL | 328.62 |
| 4918 pSymb | psmb           | CDS | 233410 | - | 233829 | - | 30 | 30 | ON  | 341.27 | 345.22 | NIL | 362.09 | ON  | 380.18 | ON  | 389.95 |
| 4919 pSymb | psmb           | CDS | 233826 | - | 234800 | - | 30 | 30 | ON  | 369.04 | 333.84 | NIL | 357.05 | ON  | 357.86 | NIL | 368.98 |
| 4920 pSymb | psmb           | CDS | 235032 | - | 236036 | - | 30 | 30 | ON  | 319.83 | 315.23 | ON  | 325.23 | ON  | 421.15 | ON  | 325.57 |
| 4921 pSymb | psmb           | CDS | 237509 | - | 237451 | - | 30 | 30 | NIL | 296.61 | 282.71 | NIL | 287.16 | NIL | 278.36 | NIL | 309.7  |
| 4922 pSymb | psmb           | CDS | 238453 | - | 239291 | - | 30 | 30 | NIL | 337.59 | 300.56 | NIL | 269.11 | NIL | 269.11 | NIL | 288.68 |
| 4923 pSymb | psmb           | CDS | 239291 | - | 240520 | - | 30 | 30 | ON  | 330.99 | 317.04 | NIL | 266.55 | ON  | 335.23 | NIL | 345.41 |
| 4924 pSymb | psmb           | CDS | 239322 | - | 240520 | - | 30 | 30 | ON  | 316.11 | 311.35 | NIL | 296.63 | ON  | 352.47 | NIL | 356.21 |
| 4925 pSymb | psmb           | CDS | 241611 | - | 242075 | - | 30 | 30 | NIL | 294.52 | 274.28 | NIL | 345.93 | ON  | 336.51 | NIL | 325.47 |
| 4926 pSymb | psmb           | CDS | 241731 | - | 242307 | - | 30 | 30 | NIL | 346.08 | 350.1  | ON  | 445.94 | ON  | 411.8  | NIL | 415.66 |
| 4927 pSymb | psmb           | CDS | 242300 | - | 244240 | - | 30 | 30 | NIL | 292.77 | 301.87 | NIL | 329.6  | NIL | 307.08 | NIL | 319.58 |
| 4928 pSymb | psmb           | CDS | 244260 | - | 245378 | - | 30 | 30 | ON  | 333.61 | 331.89 | NIL | 351.37 | NIL | 311.99 | NIL | 338.57 |
| 4929 pSymb | psmb           | CDS | 245375 | - | 246460 | - | 30 | 30 | ON  | 346.07 | 307.22 | NIL | 347.73 | ON  | 345.69 | NIL | 363.65 |
| 4930 pSymb | psmb           | CDS | 246457 | - | 247587 | - | 30 | 30 | ON  | 390.71 | 346.47 | ON  | 395.46 | ON  | 419.73 | NIL | 367.4  |
| 4931 pSymb | psmb           | CDS | 247592 | - | 248743 | - | 31 | 31 | ON  | 363.87 | 349.56 | NIL | 335.89 | ON  | 397.55 | NIL | 352.79 |
| 4932 pSymb | psmb           | CDS | 247592 | - | 249861 | - | 30 | 30 | ON  | 335.2  | 336.83 | NIL | 302.63 | NIL | 292.44 | NIL | 315.89 |
| 4933 pSymb | psmb           | CDS | 249858 | - | 250964 | - | 30 | 30 | ON  | 341.67 | 314.29 | NIL | 313.96 | NIL | 324.1  | NIL | 348.61 |
| 4934 pSymb | psmb           | CDS | 251298 | - | 252290 | - | 30 | 30 | NIL | 322.32 | 345.29 | ON  | 395.11 | NIL | 277.46 | NIL | 372.27 |
| 4935 pSymb | psmb           | CDS | 252295 | - | 253308 | - | 30 | 30 | NIL | 273.76 | 322.75 | NIL | 277.46 | ON  | 247.05 | NIL | 289.72 |
| 4936 pSymb | psmb           | CDS | 253338 | - | 255086 | - | 30 | 30 | NIL | 334.76 | 322.75 | NIL | 362.41 | ON  | 346.9  | ON  | 380.11 |
| 4937 pSymb | psmb           | CDS | 255328 | - | 256341 | - | 33 | 33 | NIL | 289.18 | 335.02 | NIL | 268.98 | ON  | 286.2  | NIL | 294.22 |
| 4938 pSymb | psmb           | CDS | 256338 | - | 256937 | - | 30 | 30 | ON  | 328.18 | 360.27 | NIL | 354.01 | NIL | 336.78 | NIL | 359.37 |
| 4939 pSymb | psmb           | CDS | 257009 | - | 257971 | - | 31 | 31 | NIL | 283.42 | 295.53 | NIL | 353.73 | ON  | 347.58 | NIL | 333.5  |
| 4940 pSymb | psmb           | CDS | 257884 | - | 259248 | - | 30 | 30 | ON  | 332.63 | 319.66 | ON  | 466.44 | ON  | 385.87 | NIL | 352.44 |
| 4941 pSymb | psmb           | CDS | 259295 | - | 260200 | - | 30 | 30 | NIL | 313.57 | 340.73 | NIL | 306.2  | NIL | 317.63 | NIL | 305.75 |
| 4942 pSymb | psmb           | CDS | 260409 | - | 260684 | - | 30 | 30 | ON  | 331.88 | 312.49 | NIL | 322.57 | ON  | 333.53 | NIL | 357.94 |
| 4943 pSymb | psmb           | CDS | 260759 | - | 261310 | - | 30 | 30 | NIL | 302.18 | 320.4  | NIL | 331.78 | NIL | 324.64 | ON  | 383.14 |
| 4944 pSymb | psmb           | CDS | 261442 | - | 261891 | - | 30 | 30 | ON  | 348.3  | 358.64 | ON  | 431.7  | ON  | 412.5  | ON  | 373.34 |
| 4945 pSymb | psmb           | CDS | 262074 | - | 263132 | - | 30 | 30 | ON  | 402.33 | 371.13 | ON  | 390.29 | ON  | 406.2  | ON  | 374.94 |
| 4946 pSymb | psmb           | CDS | 263237 | - | 263937 | - | 30 | 30 | ON  | 344.41 | 326.21 | NIL | 322.67 | NIL | 332.67 | NIL | 339.2  |
| 4947 pSymb | psmb           | CDS | 264068 | - | 265030 | - | 30 | 30 | ON  | 497.28 | 534.92 | ON  | 459.84 | ON  | 390.24 | ON  | 484.72 |
| 4948 pSymb | psmb           | CDS | 265074 | - | 265470 | - | 30 | 30 | ON  | 337.31 | 354.77 | NIL | 347.44 | NIL | 334.17 | NIL | 345.01 |
| 4949 pSymb | psmb           | CDS | 265534 | - | 266571 | - | 30 | 30 | ON  | 346.17 | 341.69 | ON  | 379.44 | NIL | 351.41 | NIL | 370.81 |
| 4950 pSymb | psmb           | CDS | 266814 | - | 268331 | - | 30 | 30 | ON  | 656.69 | 532.5  | ON  | 464.56 | ON  | 486.15 | NIL | 381.48 |
| 4951 pSymb | psmb           | CDS | 268518 | - | 269324 | - | 30 | 30 | ON  | 890.17 | 363.48 | NIL | 342.89 | NIL | 307.43 | NIL | 303.48 |
| 4952 pSymb | psmb           | CDS | 269391 | - | 270056 | - | 30 | 30 | ON  | 536.1  | 287.7  | NIL | 240.74 | NIL | 233.19 | NIL | 251.96 |
| 4953 pSymb | psmb           | CDS | 270069 | - | 270722 | - | 30 | 30 | ON  | 525.73 | 346    | NIL | 336.29 | ON  | 366.04 | NIL | 311.86 |
| 4954 pSymb | psmb           | CDS | 270715 | - | 271437 | - | 30 | 30 | ON  | 472.55 | 300.95 | NIL | 351    | NIL | 325.27 | NIL | 324.52 |
| 4955 pSymb | psmb           | CDS | 271438 | - | 272679 | - | 30 | 30 | ON  | 516.26 | 334.91 | NIL | 334.41 | ON  | 364.46 | NIL | 389.72 |
| 4956 pSymb | psmb           | CDS | 272694 | - | 273694 | - | 30 | 30 | ON  | 429.05 | 357.68 | ON  | 403.73 | ON  | 349.29 | NIL | 357.35 |
| 4957 pSymb | psmb           | CDS | 273692 | - | 275382 | - | 30 | 30 | ON  | 558.53 | 449.94 | NIL | 430.46 | ON  | 343.44 | NIL | 335.97 |
| 4958 pSymb | psmb           | CDS | 275434 | - | 276462 | - | 30 | 30 | ON  |        |        | ON  |        | ON  | 412.08 | NIL | 367.14 |

|      |       |                    |     |        |        |   |    |    |     |        |     |        |     |        |     |         |     |        |
|------|-------|--------------------|-----|--------|--------|---|----|----|-----|--------|-----|--------|-----|--------|-----|---------|-----|--------|
| 4959 | ψSymB | ?_SMB20271         | CDS | 276546 | 276977 | + | 30 | 30 | ON  | 350.84 | NIL | 315.1  | ON  | 413.58 | ON  | 356.36  | NIL | 351.4  |
| 4960 | ψSymB | ?_SMB20272         | CDS | 277378 | 278586 | + | 30 | 30 | ON  | 363.88 | NIL | 365.5  | NIL | 333.34 | ON  | 344.88  | NIL | 350.89 |
| 4961 | ψSymB | ?_SMB20273         | CDS | 278844 | 279844 | - | 30 | 30 | ON  | 374.53 | NIL | 405.31 | NIL | 315.01 | ON  | 322.01  | NIL | 325.1  |
| 4962 | ψSymB | ?_SMB20274         | CDS | 279100 | 279265 | - | 30 | 30 | NIL | 224.04 | NIL | 227.16 | NIL | 222.08 | NIL | 220.5   | NIL | 268.33 |
| 4963 | ψSymB | ?_SMB20275         | CDS | 279463 | 280323 | - | 30 | 30 | ON  | 318.95 | NIL | 312.81 | NIL | 312.81 | NIL | 321.73  | NIL | 322.03 |
| 4964 | ψSymB | ?_SMB20276         | CDS | 280415 | 281305 | + | 30 | 30 | ON  | 402.27 | ON  | 403.39 | ON  | 443.87 | ON  | 337.07  | ON  | 336.32 |
| 4965 | ψSymB | ?_SMB20277         | CDS | 281302 | 282645 | + | 30 | 30 | NIL | 376.95 | ON  | 367.78 | NIL | 352.65 | NIL | 343.87  | ON  | 396.32 |
| 4966 | ψSymB | ?_SMB20278         | CDS | 282954 | 283532 | - | 30 | 30 | NIL | 307.43 | ON  | 336.29 | NIL | 352.37 | NIL | 317.22  | NIL | 301.2  |
| 4967 | ψSymB | ?_SMB20279         | CDS | 283534 | 284037 | - | 30 | 30 | NIL | 309.01 | ON  | 340.06 | NIL | 338.76 | NIL | 313.37  | ON  | 328.29 |
| 4968 | ψSymB | ?_SMB20280         | CDS | 284069 | 285535 | - | 30 | 30 | ON  | 393.88 | ON  | 406.47 | ON  | 390.26 | ON  | 376.31  | ON  | 410.76 |
| 4969 | ψSymB | ?_SMB20281         | CDS | 285617 | 286535 | - | 30 | 30 | ON  | 393.88 | ON  | 457.3  | NIL | 363.98 | ON  | 384.63  | ON  | 390.82 |
| 4970 | ψSymB | ?_SMB20282         | CDS | 286687 | 287482 | - | 30 | 30 | ON  | 409.33 | ON  | 297.99 | NIL | 319.1  | NIL | 308.59  | NIL | 303.62 |
| 4971 | ψSymB | ?_SMB20283         | CDS | 287493 | 288476 | - | 30 | 30 | ON  | 390.23 | ON  | 381.19 | NIL | 329.73 | ON  | 359.22  | ON  | 392.76 |
| 4972 | ψSymB | ?_SMB20284         | CDS | 288561 | 289661 | - | 30 | 30 | ON  | 428.31 | ON  | 504.68 | ON  | 386.36 | ON  | 430.43  | NIL | 336.44 |
| 4973 | ψSymB | ?_SMB20285         | CDS | 289741 | 290718 | - | 35 | 35 | ON  | 324.67 | ON  | 403.29 | NIL | 346.36 | ON  | 361.05  | NIL | 326.91 |
| 4974 | ψSymB | ?_SMB20286         | CDS | 290921 | 292000 | + | 30 | 30 | ON  | 426.49 | ON  | 392.94 | NIL | 344.75 | ON  | 373.02  | NIL | 323.02 |
| 4975 | ψSymB | ?_SMB20287         | CDS | 292019 | 292726 | - | 31 | 31 | ON  | 341.07 | ON  | 357.93 | NIL | 346.3  | NIL | 322.31  | ON  | 379.54 |
| 4976 | ψSymB | ?_SMB20288         | CDS | 292723 | 294123 | - | 30 | 30 | ON  | 335.93 | NIL | 301.39 | ON  | 394.26 | ON  | 394.01  | ON  | 398.04 |
| 4977 | ψSymB | ?_SMB20289         | CDS | 294233 | 295582 | - | 30 | 30 | NIL | 284.52 | NIL | 294.86 | NIL | 323.69 | ON  | 352.66  | NIL | 319.34 |
| 4978 | ψSymB | ?_SMB20290         | CDS | 295734 | 296737 | + | 30 | 30 | NIL | 304.27 | ON  | 351.9  | ON  | 389.58 | ON  | 381.81  | NIL | 333.86 |
| 4979 | ψSymB | ?_SMB20291         | CDS | 296737 | 299220 | - | 30 | 30 | ON  | 498.85 | ON  | 454.12 | NIL | 360    | ON  | 455.43  | ON  | 621.73 |
| 4980 | ψSymB | ?_SMB20292         | CDS | 299408 | 300391 | - | 30 | 30 | ON  | 932.74 | ON  | 763.66 | ON  | 619.95 | ON  | 1068.89 | ON  | 334.27 |
| 4981 | ψSymB | ?_SMB20293         | CDS | 300703 | 301062 | + | 31 | 29 | NIL | 304.5  | NIL | 292.74 | NIL | 314.62 | NIL | 296     | NIL | 337.85 |
| 4982 | ψSymB | ?_SMB20294         | CDS | 301194 | 301895 | + | 30 | 30 | NIL | 280.81 | NIL | 335.21 | NIL | 309.34 | NIL | 312.16  | NIL | 311.53 |
| 4983 | ψSymB | ?_SMB20295         | CDS | 302951 | 303469 | + | 30 | 30 | ON  | 342.85 | NIL | 315.58 | NIL | 451.05 | ON  | 443.86  | ON  | 380.34 |
| 4984 | ψSymB | ?_SMB20296         | CDS | 303469 | 304750 | + | 30 | 30 | ON  | 381.73 | NIL | 381.28 | ON  | 375.42 | ON  | 392.07  | NIL | 333.5  |
| 4985 | ψSymB | ?_SMB20297         | CDS | 303470 | 305682 | + | 30 | 30 | ON  | 344.91 | ON  | 337.72 | NIL | 325.32 | ON  | 370.33  | NIL | 366.56 |
| 4986 | ψSymB | ?_SMB20298         | CDS | 305696 | 306595 | + | 30 | 30 | ON  | 336.29 | ON  | 347.22 | NIL | 329.72 | NIL | 306.02  | NIL | 347.7  |
| 4987 | ψSymB | hmlA_SMB20299      | CDS | 306596 | 306845 | + | 30 | 30 | ON  | 337.33 | ON  | 346.91 | ON  | 436.3  | ON  | 416.7   | ON  | 339.12 |
| 4988 | ψSymB | GMF7_SMB20300      | CDS | 306932 | 308845 | - | 30 | 30 | ON  | 337.33 | ON  | 374.54 | ON  | 446.3  | ON  | 387.35  | ON  | 387.35 |
| 4989 | ψSymB | ?_SMB20301         | CDS | 308842 | 309972 | - | 30 | 30 | ON  | 392.54 | ON  | 376.91 | ON  | 441.27 | ON  | 382.47  | ON  | 394.44 |
| 4990 | ψSymB | ?_SMB20302         | CDS | 310120 | 310281 | - | 30 | 30 | ON  | 308.49 | NIL | 304.89 | NIL | 232.1  | NIL | 256.59  | NIL | 264.55 |
| 4991 | ψSymB | ?_SMB20303         | CDS | 310478 | 310705 | + | 30 | 30 | NIL | 283.71 | NIL | 315.67 | NIL | 235.67 | NIL | 319.25  | NIL | 286.25 |
| 4992 | ψSymB | Trm20112C_SMB20304 | CDS | 310762 | 311367 | - | 84 | 0  | NIL | 541.33 | ON  | 598.02 | ON  | 425.71 | ON  | 463.13  | ON  | 453.33 |
| 4993 | ψSymB | Trm20112_SMB20306  | CDS | 311062 | 311373 | + | 63 | 0  | ON  | 523.33 | ON  | 598.02 | ON  | 484.96 | ON  | 565.65  | ON  | 526.33 |
| 4994 | ψSymB | Trm20112N_SMB20305 | CDS | 311801 | 311708 | - | 41 | 0  | ON  | 967.09 | ON  | 111.59 | ON  | 476.16 | ON  | 633.14  | ON  | 465.21 |
| 4995 | ψSymB | ?_SMB20307         | CDS | 311801 | 312448 | - | 30 | 30 | ON  | 416.16 | ON  | 395.07 | ON  | 389.76 | ON  | 411.14  | ON  | 391.58 |
| 4996 | ψSymB | ?_SMB20312         | CDS | 312527 | 314614 | - | 30 | 30 | ON  | 350.28 | ON  | 407.26 | ON  | 431.52 | ON  | 291.91  | NIL | 394.57 |
| 4997 | ψSymB | ?_SMB20313         | CDS | 314728 | 315369 | - | 30 | 30 | ON  | 340.81 | NIL | 283.25 | NIL | 291.91 | NIL | 309.87  | NIL | 342.12 |
| 4998 | ψSymB | ?_SMB20314         | CDS | 315380 | 316372 | - | 30 | 30 | ON  | 348.39 | ON  | 333.38 | NIL | 323.79 | NIL | 323.79  | NIL | 302.34 |
| 4999 | ψSymB | ?_SMB20315         | CDS | 316619 | 317749 | + | 30 | 30 | ON  | 309.83 | ON  | 340.07 | ON  | 320.62 | ON  | 301.54  | NIL | 286.56 |
| 5000 | ψSymB | ?_SMB20316         | CDS | 317829 | 318830 | + | 30 | 30 | ON  | 347.65 | ON  | 362.74 | NIL | 353.21 | ON  | 360.44  | NIL | 364.36 |
| 5001 | ψSymB | ?_SMB20317         | CDS | 318948 | 320496 | + | 30 | 30 | ON  | 326.52 | ON  | 343.09 | NIL | 365.75 | ON  | 372.66  | NIL | 332.46 |
| 5002 | ψSymB | ?_SMB20318         | CDS | 320500 | 321531 | + | 30 | 30 | ON  | 317.65 | ON  | 341.26 | NIL | 307.12 | NIL | 293.33  | NIL | 318.53 |
| 5003 | ψSymB | ?_SMB20319         | CDS | 321582 | 322790 | - | 30 | 30 | ON  | 355.75 | ON  | 374.56 | NIL | 332.43 | NIL | 340.02  | NIL | 302.09 |
| 5004 | ψSymB | ?_SMB20320         | CDS | 322940 | 323935 | - | 30 | 30 | ON  | 365.1  | ON  | 407.17 | NIL | 345.64 | ON  | 345.51  | ON  | 386.57 |
| 5005 | ψSymB | ?_SMB20321         | CDS | 323964 | 325229 | - | 30 | 30 | ON  | 314.41 | ON  | 348.76 | NIL | 297.73 | NIL | 322.09  | NIL | 299.54 |
| 5006 | ψSymB | ?_SMB20322         | CDS | 325834 | 325824 | - | 30 | 30 | NIL | 292.71 | NIL | 259.5  | NIL | 320.41 | NIL | 295.92  | NIL | 318.71 |
| 5007 | ψSymB | ?_SMB20323         | CDS | 325922 | 326581 | + | 30 | 30 | ON  | 351.19 | ON  | 358.68 | NIL | 328.79 | ON  | 386.24  | NIL | 327.74 |
| 5008 | ψSymB | thur_SMB20324      | CDS | 326603 | 327619 | - | 30 | 30 | ON  | 341.39 | ON  | 332.35 | NIL | 306.18 | ON  | 353.35  | NIL | 327.63 |
| 5009 | ψSymB | thuf_SMB20325      | CDS | 328098 | 329043 | + | 30 | 30 | ON  | 463.92 | ON  | 417.28 | NIL | 343.39 | ON  | 400.72  | NIL | 341.61 |
| 5010 | ψSymB | thuf_SMB20326      | CDS | 329457 | 330443 | + | 30 | 30 | ON  | 371.4  | ON  | 388.72 | NIL | 305.85 | ON  | 361.63  | NIL | 297.96 |
| 5011 | ψSymB | thug_SMB20327      | CDS | 330443 | 331273 | + | 30 | 30 | ON  | 368.95 | ON  | 373.91 | NIL | 296.58 | NIL | 332.28  | NIL | 345.11 |
| 5012 | ψSymB | thuk_SMB20328      | CDS | 331283 | 332311 | + | 30 | 30 | ON  | 371.57 | ON  | 353.83 | NIL | 320.38 | NIL | 333.22  | NIL | 327.55 |
| 5013 | ψSymB | thua_SMB20329      | CDS | 332477 | 333289 | + | 30 | 30 | ON  | 522.98 | ON  | 429.83 | ON  | 456.01 | ON  | 441.81  | ON  | 388.08 |
| 5014 | ψSymB | thub_SMB20330      | CDS | 333286 | 334383 | + | 30 | 30 | ON  | 570.91 | ON  | 407.34 | ON  | 512.87 | ON  | 479.82  | ON  | 404.91 |
| 5015 | ψSymB | ?_SMB20331         | CDS | 334596 | 334952 | - | 30 | 30 | NIL | 281.87 | ON  | 331.26 | NIL | 282.22 | NIL | 295.79  | NIL | 301.66 |
| 5016 | ψSymB | ?_SMB20332         | CDS | 335644 | 336585 | + | 30 | 30 | NIL | 322.52 | ON  | 333.93 | NIL | 324.02 | NIL | 319.37  | NIL | 300.83 |
| 5017 | ψSymB | ?_SMB20333         | CDS | 336729 | 338594 | - | 30 | 30 | NIL | 302.37 | ON  | 340.78 | ON  | 450.12 | ON  | 358.05  | ON  | 377.63 |
| 5018 | ψSymB | ?_SMB20334         | CDS | 339465 | 340376 | + | 30 | 30 | NIL | 380.7  | ON  | 350.15 | ON  | 473.63 | ON  | 476.6   | ON  | 394.61 |
| 5019 | ψSymB | ?_SMB20335         | CDS | 340729 | 341877 | + | 30 | 30 | ON  | 330.1  | ON  | 423.24 | NIL | 320.86 | ON  | 383.65  | NIL | 332.61 |
| 5020 | ψSymB | ?_SMB20336         | CDS | 341927 | 342776 | - | 30 | 30 | ON  | 337.22 | ON  | 369.42 | ON  | 374.2  | ON  | 412.56  | NIL | 367.02 |
| 5021 | ψSymB | ?_SMB20337         | CDS | 342776 | 343387 | + | 30 | 30 | ON  | 386.23 | NIL | 401.12 | NIL | 386.65 | ON  | 386.39  | ON  | 389.84 |
| 5022 | ψSymB | ?_SMB20338         | CDS | 343485 | 344708 | + | 30 | 30 | NIL | 310.04 | NIL | 273.53 | NIL | 273.53 | NIL | 293.51  | NIL | 293.51 |
| 5023 | ψSymB | ?_SMB20339         | CDS | 344797 | 345579 | + | 30 | 30 | NIL | 283.32 | NIL | 277.02 | NIL | 290.95 | NIL | 279.43  | NIL | 306.21 |
| 5024 | ψSymB | ?_SMB20340         | CDS | 345349 | 345528 | + | 30 | 30 | NIL | 372.39 | NIL | 305.46 | NIL | 393.38 | ON  | 393.38  | ON  | 383.74 |
| 5025 | ψSymB | ?_SMB20341         | CDS | 345733 | 345918 | + | 30 | 30 | NIL | 305.68 | NIL | 300.64 | NIL | 281.66 | NIL | 263.14  | NIL | 292.64 |
| 5026 | ψSymB | ?_SMB20342         | CDS | 346305 | 346818 | - | 30 | 30 | ON  | 395.92 | ON  | 377.58 | NIL | 353.4  | ON  | 409.23  | ON  | 403.64 |
| 5027 | ψSymB | ?_SMB20343         | CDS | 348520 | 348978 | - | 30 | 30 | ON  | 356.6  | NIL | 318.5  | NIL | 299.62 | ON  | 352.76  | NIL | 340.51 |
| 5028 | ψSymB | ?_SMB20344         | CDS | 349255 | 350211 | - | 30 | 30 | ON  | 367.1  | NIL | 380.09 | ON  | 380.6  | ON  | 381.18  | NIL | 389.8  |
| 5029 | ψSymB | ?_SMB20345         | CDS | 350348 | 353497 | - | 30 | 30 | ON  | 379.84 | ON  | 371.43 | NIL | 288.11 | ON  | 339.87  | NIL | 299.45 |
| 5030 | ψSymB | ?_SMB20346         | CDS | 353526 | 354680 | - | 30 | 30 | ON  | 399.33 | ON  | 331.87 | NIL | 347.8  | ON  | 354.18  | NIL | 324.45 |

|      |       |               |     |         |          |    |    |     |        |     |        |     |        |     |        |     |        |
|------|-------|---------------|-----|---------|----------|----|----|-----|--------|-----|--------|-----|--------|-----|--------|-----|--------|
| 5031 | psymb | ?_SMB20347    | CDS | 3554773 | 355381 - | 30 | 30 | ON  | 349.63 | NIL | 292.26 | NIL | 305.09 | NIL | 326.59 | NIL | 331.36 |
| 5032 | psymb | ?_SMB20348    | CDS | 355568  | 356395 + | 30 | 30 | ON  | 374.51 | NIL | 533.72 | NIL | 427.19 | ON  | 589.86 | ON  | 512.3  |
| 5033 | psymb | ?_SMB20349    | CDS | 356464  | 357405 + | 30 | 30 | NIL | 281.45 | ON  | 335.89 | NIL | 298.81 | ON  | 451.34 | NIL | 319.26 |
| 5034 | psymb | ?_SMB20350    | CDS | 357571  | 358215 + | 30 | 30 | ON  | 309.35 | ON  | 343.18 | NIL | 366.96 | ON  | 411.57 | NIL | 359.96 |
| 5036 | psymb | ?_SMB20352    | CDS | 358212  | 359762 + | 30 | 30 | NIL | 276.68 | ON  | 369.83 | NIL | 332.88 | ON  | 350.11 | NIL | 280.46 |
| 5037 | psymb | ?_SMB20353    | CDS | 359762  | 360826 + | 30 | 30 | ON  | 346.44 | ON  | 355.91 | NIL | 308.93 | ON  | 381.63 | NIL | 348.61 |
| 5038 | psymb | ?_SMB20354    | CDS | 360832  | 361866 + | 30 | 30 | ON  | 327.26 | ON  | 327.33 | ON  | 405.74 | ON  | 388.28 | NIL | 348.43 |
| 5039 | psymb | ?_SMB20355    | CDS | 361863  | 363372 + | 30 | 30 | ON  | 327.33 | ON  | 370.92 | NIL | 400.5  | ON  | 434.44 | NIL | 348.26 |
| 5040 | psymb | ?_SMB20356    | CDS | 363905  | 364663 + | 30 | 30 | ON  | 328.11 | ON  | 330.22 | NIL | 423.6  | ON  | 306.76 | NIL | 347.72 |
| 5041 | psymb | ?_SMB20357    | CDS | 364660  | 367413 + | 40 | 40 | NIL | 308.28 | ON  | 324.5  | ON  | 505.36 | ON  | 434.16 | ON  | 405.38 |
| 5042 | psymb | ?_SMB20358    | CDS | 367812  | 367803 + | 30 | 30 | NIL | 314.58 | ON  | 369.58 | NIL | 423.6  | ON  | 357.98 | NIL | 346.72 |
| 5043 | psymb | ?_SMB20359    | CDS | 369491  | 369974 + | 30 | 30 | NIL | 280.41 | NIL | 287.62 | NIL | 305.9  | NIL | 307    | NIL | 326.57 |
| 5044 | psymb | ?_SMB20360    | CDS | 370827  | 370786 + | 30 | 30 | NIL | 291.98 | NIL | 311.17 | NIL | 319.13 | ON  | 322.92 | NIL | 336.74 |
| 5045 | psymb | ?_SMB20361    | CDS | 371644  | 371558 + | 30 | 30 | ON  | 354.04 | NIL | 328.31 | ON  | 409.93 | ON  | 334.18 | NIL | 333.75 |
| 5046 | psymb | ?_SMB20362    | CDS | 372532  | 373332 - | 30 | 30 | ON  | 364.87 | NIL | 297.4  | NIL | 277.16 | NIL | 302.03 | NIL | 305.48 |
| 5047 | psymb | ?_SMB20363    | CDS | 373363  | 373332 - | 31 | 31 | NIL | 405.92 | NIL | 357.92 | NIL | 376.71 | ON  | 345.46 | NIL | 325.17 |
| 5048 | psymb | ?_SMB20364    | CDS | 374421  | 374424 - | 31 | 31 | NIL | 285.45 | NIL | 292.56 | NIL | 294.1  | NIL | 292.98 | NIL | 329.67 |
| 5049 | psymb | ?_SMB20365    | CDS | 374421  | 376852 - | 30 | 30 | NIL | 304.59 | NIL | 302.58 | NIL | 347.18 | ON  | 343.73 | NIL | 304.63 |
| 5050 | psymb | ?_SMB20366    | CDS | 376824  | 377930 + | 30 | 30 | ON  | 317.68 | NIL | 326.77 | ON  | 425.21 | ON  | 426.26 | NIL | 359.14 |
| 5051 | psymb | ?_SMB20367    | CDS | 379530  | 380222 - | 30 | 30 | NIL | 323.39 | ON  | 333.2  | NIL | 343.51 | NIL | 307.07 | NIL | 306.02 |
| 5052 | psymb | ?_SMB20368    | CDS | 379530  | 380222 - | 30 | 30 | NIL | 266.15 | ON  | 321.51 | ON  | 398.07 | ON  | 363.53 | NIL | 377.12 |
| 5053 | psymb | ?_SMB20369    | CDS | 380366  | 381379 + | 30 | 30 | ON  | 405.96 | ON  | 435.99 | ON  | 477.28 | ON  | 433.85 | ON  | 399.03 |
| 5054 | psymb | ?_SMB20370    | CDS | 381385  | 382626 + | 30 | 30 | ON  | 336.43 | ON  | 341.74 | ON  | 393.34 | ON  | 388.23 | NIL | 321.36 |
| 5055 | psymb | ?_SMB20371    | CDS | 382423  | 383303 + | 30 | 30 | NIL | 291.95 | NIL | 331.63 | NIL | 337.6  | NIL | 312.85 | NIL | 358.28 |
| 5056 | psymb | ?_SMB20372    | CDS | 383348  | 383794 - | 30 | 30 | NIL | 321.09 | ON  | 315.4  | NIL | 336.1  | NIL | 303.56 | NIL | 308.54 |
| 5057 | psymb | ?_SMB20373    | CDS | 383818  | 385095 - | 30 | 30 | ON  | 371.05 | ON  | 383.89 | NIL | 356.28 | ON  | 383.99 | NIL | 338.94 |
| 5058 | psymb | ?_SMB20374    | CDS | 385107  | 385574 - | 30 | 30 | ON  | 329.79 | ON  | 326.95 | NIL | 312.87 | NIL | 266.57 | ON  | 304.18 |
| 5059 | psymb | ?_SMB20375    | CDS | 386667  | 387437 - | 30 | 30 | ON  | 457.57 | ON  | 412.56 | ON  | 392.05 | ON  | 446.93 | ON  | 406.06 |
| 5060 | psymb | ?_SMB20376    | CDS | 387641  | 388021 - | 30 | 30 | ON  | 358.66 | ON  | 363.56 | NIL | 374.83 | NIL | 327.07 | NIL | 343.71 |
| 5061 | psymb | ?_SMB20377    | CDS | 387641  | 388021 - | 30 | 30 | ON  | 339.91 | ON  | 333.96 | NIL | 321.32 | NIL | 334.41 | NIL | 303.45 |
| 5062 | psymb | ?_SMB20378    | CDS | 388065  | 388448 - | 30 | 30 | ON  | 321    | NIL | 290.09 | NIL | 338.09 | NIL | 301.66 | NIL | 311.03 |
| 5063 | psymb | ?_SMB20379    | CDS | 388945  | 389945 - | 30 | 30 | ON  | 350.18 | ON  | 329.2  | NIL | 354.26 | NIL | 320.97 | NIL | 333.41 |
| 5064 | psymb | ?_SMB20380    | CDS | 389955  | 391340 - | 30 | 30 | ON  | 349.27 | ON  | 333.19 | ON  | 390.87 | NIL | 385.15 | NIL | 433.97 |
| 5065 | psymb | ?_SMB20381    | CDS | 391371  | 392420 - | 30 | 30 | ON  | 357.44 | NIL | 305.35 | ON  | 403.23 | ON  | 398.36 | NIL | 357.08 |
| 5066 | psymb | ?_SMB20382    | CDS | 392366  | 393266 - | 30 | 30 | ON  | 341.73 | ON  | 335.17 | NIL | 262.23 | NIL | 298.76 | NIL | 301.34 |
| 5067 | psymb | ?_SMB20383    | CDS | 393263  | 394114 - | 30 | 30 | ON  | 323.79 | NIL | 343.88 | NIL | 315.55 | NIL | 327.23 | NIL | 308.18 |
| 5068 | psymb | ?_SMB20384    | CDS | 394240  | 395313 - | 30 | 30 | ON  | 332.35 | ON  | 330.73 | ON  | 330.73 | ON  | 355.19 | NIL | 303.79 |
| 5069 | psymb | ?_SMB20385    | CDS | 395419  | 396390 - | 30 | 30 | ON  | 366.97 | ON  | 361.97 | NIL | 346.59 | NIL | 332.87 | NIL | 352.12 |
| 5070 | psymb | ?_SMB20386    | CDS | 396404  | 397132 - | 31 | 31 | ON  | 353.8  | ON  | 339.33 | ON  | 400.1  | ON  | 332.43 | NIL | 352.71 |
| 5071 | psymb | ?_SMB20387    | CDS | 397129  | 398986 - | 30 | 30 | ON  | 361.15 | NIL | 319.55 | NIL | 303.36 | NIL | 289.75 | NIL | 304.35 |
| 5072 | psymb | ?_SMB20388    | CDS | 399980  | 400960 - | 30 | 30 | ON  | 323.86 | NIL | 319.35 | NIL | 329.1  | NIL | 352.93 | NIL | 357    |
| 5073 | psymb | ?_SMB20389    | CDS | 400975  | 402000 - | 30 | 30 | ON  | 338.09 | ON  | 332.11 | NIL | 307.29 | NIL | 299.16 | NIL | 337.33 |
| 5074 | psymb | ?_SMB20390    | CDS | 402936  | 403668 + | 30 | 30 | NIL | 306.06 | NIL | 322.17 | ON  | 431.25 | NIL | 353.62 | NIL | 335.2  |
| 5075 | psymb | ?_SMB20391    | CDS | 403650  | 405644 + | 30 | 30 | ON  | 308.37 | ON  | 351.27 | NIL | 295.79 | NIL | 309.4  | NIL | 312.5  |
| 5076 | psymb | ?_SMB20392    | CDS | 405680  | 406687 - | 30 | 30 | NIL | 301.35 | ON  | 360.2  | NIL | 296.76 | NIL | 312.94 | NIL | 305.73 |
| 5077 | psymb | ?_SMB20393    | CDS | 406532  | 407788 + | 30 | 30 | ON  | 311.21 | ON  | 375.09 | ON  | 401.43 | ON  | 371.85 | NIL | 363.3  |
| 5078 | psymb | ?_SMB20394    | CDS | 407812  | 409140 + | 30 | 30 | ON  | 325.65 | ON  | 392    | NIL | 364.84 | ON  | 426.65 | ON  | 404.06 |
| 5079 | psymb | ?_SMB20395    | CDS | 409180  | 411429 - | 30 | 30 | ON  | 372.39 | ON  | 386.58 | NIL | 336.27 | NIL | 341.26 | NIL | 357.93 |
| 5080 | psymb | ?_SMB20396    | CDS | 411473  | 412456 - | 31 | 31 | ON  | 350.46 | NIL | 322.79 | NIL | 359.16 | NIL | 314.53 | NIL | 335.7  |
| 5081 | psymb | ?_SMB20397    | CDS | 412453  | 413019 - | 30 | 30 | NIL | 304.59 | NIL | 291.28 | NIL | 308.86 | NIL | 316.77 | NIL | 306.92 |
| 5082 | psymb | ?_SMB20398    | CDS | 413186  | 413680 - | 30 | 30 | NIL | 281.28 | NIL | 297.27 | NIL | 326.06 | NIL | 305.3  | NIL | 289.25 |
| 5083 | psymb | ?_SMB20399    | CDS | 413764  | 414354 + | 30 | 30 | NIL | 333.99 | NIL | 338.21 | NIL | 337.68 | NIL | 324.71 | NIL | 369.54 |
| 5084 | psymb | ?_SMB20400    | CDS | 414364  | 414627 - | 30 | 30 | NIL | 268.76 | NIL | 279.66 | ON  | 397.1  | ON  | 344.08 | NIL | 363.72 |
| 5085 | psymb | ?_SMB20401    | CDS | 414654  | 414827 - | 30 | 30 | ON  | 369.75 | ON  | 417.67 | ON  | 448.47 | ON  | 457.09 | ON  | 453.87 |
| 5086 | psymb | ?_SMB20402    | CDS | 414971  | 416359 + | 30 | 30 | ON  | 332.54 | ON  | 442.76 | ON  | 401.44 | ON  | 383.15 | NIL | 366.97 |
| 5087 | psymb | ?_SMB20403    | CDS | 416362  | 419099 + | 30 | 30 | NIL | 293.33 | NIL | 293.63 | NIL | 323.14 | NIL | 298.04 | NIL | 283.46 |
| 5088 | psymb | ?_SMB20404    | CDS | 416859  | 419099 + | 30 | 30 | ON  | 320.94 | NIL | 284.86 | ON  | 336.79 | NIL | 371.25 | NIL | 339.59 |
| 5089 | psymb | ?_SMB20405    | CDS | 419112  | 419891 - | 30 | 30 | NIL | 287.57 | NIL | 309.57 | NIL | 342.12 | NIL | 327.25 | NIL | 314.9  |
| 5090 | psymb | hyuA_SMB20406 | CDS | 420019  | 422133 + | 30 | 30 | NIL | 273.89 | NIL | 279    | NIL | 336.79 | NIL | 304.17 | NIL | 331.74 |
| 5091 | psymb | hyuB_SMB20407 | CDS | 422142  | 424343 + | 30 | 30 | NIL | 320.18 | NIL | 344.31 | NIL | 360.09 | NIL | 332.44 | NIL | 333.98 |
| 5092 | psymb | ?_SMB20408    | CDS | 424841  | 424844 + | 30 | 30 | NIL | 273.68 | NIL | 296.62 | ON  | 300.63 | NIL | 300.36 | ON  | 300.74 |
| 5093 | psymb | ?_SMB20409    | CDS | 424841  | 425671 + | 30 | 30 | NIL | 358.21 | NIL | 349.22 | ON  | 381.3  | ON  | 380.44 | ON  | 392.84 |
| 5094 | psymb | ?_SMB20410    | CDS | 425470  | 426678 + | 30 | 30 | ON  | 333.68 | ON  | 312.9  | ON  | 402.2  | ON  | 374.53 | NIL | 344.69 |
| 5095 | psymb | ?_SMB20411    | CDS | 426694  | 426694 + | 30 | 28 | ON  | 347.07 | NIL | 327.9  | ON  | 317.02 | NIL | 317.37 | NIL | 441.97 |
| 5096 | psymb | ?_SMB20412    | CDS | 426973  | 427137 - | 30 | 30 | ON  | 336.7  | ON  | 370.99 | NIL | 358.72 | ON  | 358.72 | NIL | 335.53 |
| 5097 | psymb | ?_SMB20413    | CDS | 427134  | 427361 - | 30 | 30 | NIL | 378.83 | ON  | 392.82 | NIL | 358.63 | ON  | 421.84 | NIL | 287.15 |
| 5098 | psymb | ?_SMB20414    | CDS | 427342  | 428015 - | 30 | 30 | NIL | 266.74 | NIL | 265.18 | NIL | 256.71 | NIL | 421.84 | NIL | 287.15 |
| 5099 | psymb | ?_SMB20415    | CDS | 428015  | 429304 - | 30 | 30 | ON  | 374.16 | ON  | 333.85 | NIL | 331.46 | ON  | 367.82 | NIL | 331.38 |
| 5100 | psymb | ugpB_SMB20416 | CDS | 429673  | 430965 + | 30 | 30 | ON  | 357.82 | ON  | 410.09 | NIL | 360.18 | ON  | 555.7  | NIL | 310.22 |
| 5101 | psymb | ugpA_SMB20417 | CDS | 431083  | 431964 + | 30 | 30 | NIL | 286.26 | ON  | 332.56 | NIL | 299.48 | NIL | 332.02 | NIL | 264.72 |
| 5102 | psymb | ugpE_SMB20418 | CDS | 431973  | 432821 + | 30 | 30 | NIL | 289.1  | NIL | 311.31 | NIL | 268.04 | NIL | 324.47 | NIL | 304.45 |

|      |       |                  |     |        |          |    |    |     |        |     |        |     |        |     |        |     |        |
|------|-------|------------------|-----|--------|----------|----|----|-----|--------|-----|--------|-----|--------|-----|--------|-----|--------|
| 5103 | psymb | uqpc-SMB20419    | CDS | 432821 | 433678 + | 30 | 30 | ON  | 317.59 | ON  | 355.79 | NIL | 322.59 | ON  | 342.88 | NIL | 298.93 |
| 5104 | psymb | ?-SMB20420       | CDS | 433992 | 434618 + | 30 | 30 | ON  | 325.7  | NIL | 318.24 | NIL | 353.22 | ON  | 363.66 | NIL | 366.93 |
| 5105 | psymb | Trn21-3-SMB20421 | CDS | 434771 | 435847 + | 31 | 0  | ON  | 603.26 | ON  | 433.89 | ON  | 437.66 | ON  | 457.59 | ON  | 410.95 |
| 5106 | psymb | ?-SMB20422       | CDS | 436049 | 437128 - | 30 | 30 | ON  | 347.2  | ON  | 337.24 | ON  | 435.86 | ON  | 390.89 | NIL | 332.23 |
| 5107 | psymb | ?-SMB20423       | CDS | 437134 | 438510 - | 30 | 30 | ON  | 362.76 | ON  | 334.77 | NIL | 359.45 | ON  | 396.19 | NIL | 362.4  |
| 5108 | psymb | ?-SMB20424       | CDS | 438630 | 440126 - | 30 | 30 | NIL | 295.36 | NIL | 300.95 | NIL | 357.87 | NIL | 328.74 | NIL | 322.79 |
| 5109 | psymb | ?-SMB20425       | CDS | 440290 | 440784 - | 30 | 30 | NIL | 273.09 | NIL | 361.95 | ON  | 397.39 | ON  | 374.36 | NIL | 367.06 |
| 5110 | psymb | ?-SMB20426       | CDS | 440954 | 442270 + | 30 | 30 | NIL | 349.85 | ON  | 349.85 | ON  | 361.95 | ON  | 374.36 | NIL | 356.53 |
| 5111 | psymb | ?-SMB20427       | CDS | 442425 | 443230 + | 30 | 30 | NIL | 276.65 | NIL | 277.37 | NIL | 257.68 | NIL | 266.02 | NIL | 295.06 |
| 5112 | psymb | ?-SMB20428       | CDS | 443289 | 444140 + | 30 | 30 | NIL | 441.47 | ON  | 293.59 | NIL | 347.99 | NIL | 419.33 | ON  | 408.5  |
| 5113 | psymb | ?-SMB20429       | CDS | 444243 | 444902 + | 30 | 30 | NIL | 280.81 | NIL | 245.05 | NIL | 236.75 | NIL | 251.01 | NIL | 297.08 |
| 5114 | psymb | ?-SMB20430       | CDS | 444905 | 445657 + | 30 | 30 | NIL | 228.16 | NIL | 293.35 | NIL | 250    | NIL | 239.32 | NIL | 266.98 |
| 5115 | psymb | ?-SMB20431       | CDS | 445667 | 446352 + | 30 | 30 | NIL | 303.86 | NIL | 330.86 | NIL | 297.93 | NIL | 296.35 | NIL | 325.04 |
| 5116 | psymb | ?-SMB20432       | CDS | 446349 | 447353 + | 30 | 30 | ON  | 370.59 | ON  | 339.52 | ON  | 398.25 | ON  | 354.52 | ON  | 388.85 |
| 5117 | psymb | ?-SMB20433       | CDS | 447350 | 448339 + | 30 | 30 | ON  | 322.97 | ON  | 343.92 | NIL | 344.5  | ON  | 353.54 | NIL | 362.59 |
| 5118 | psymb | ?-SMB20434       | CDS | 448384 | 449638 + | 30 | 30 | ON  | 358.21 | ON  | 396.48 | NIL | 350.03 | ON  | 378.19 | NIL | 378.19 |
| 5119 | psymb | ?-SMB20435       | CDS | 449585 | 450580 + | 30 | 30 | ON  | 356.21 | ON  | 329.81 | ON  | 402.91 | NIL | 339.55 | ON  | 389.23 |
| 5120 | psymb | ?-SMB20436       | CDS | 450978 | 452252 + | 30 | 30 | ON  | 364.87 | NIL | 318.56 | NIL | 327.91 | NIL | 317.04 | NIL | 289.59 |
| 5121 | psymb | ?-SMB20441       | CDS | 452507 | 453247 + | 30 | 30 | NIL | 292.73 | NIL | 309.64 | NIL | 327.91 | NIL | 317.11 | NIL | 284.79 |
| 5122 | psymb | ?-SMB20442       | CDS | 453287 | 454261 + | 30 | 30 | NIL | 328.96 | NIL | 362.74 | NIL | 317.68 | ON  | 444.83 | NIL | 317.7  |
| 5123 | psymb | ?-SMB20443       | CDS | 454329 | 454901 + | 30 | 30 | NIL | 298.93 | NIL | 326.65 | NIL | 319.68 | NIL | 320.29 | NIL | 336.52 |
| 5124 | psymb | ?-SMB20444       | CDS | 454907 | 456313 + | 30 | 30 | NIL | 321.53 | ON  | 349.48 | NIL | 307.68 | ON  | 326.83 | NIL | 326.83 |
| 5125 | psymb | ?-SMB20445       | CDS | 456313 | 457371 + | 30 | 30 | ON  | 362.64 | ON  | 340.88 | NIL | 361.05 | ON  | 379.45 | NIL | 345.41 |
| 5126 | psymb | uxuA-SMB20446    | CDS | 456313 | 458589 + | 30 | 30 | ON  | 378.77 | ON  | 376.1  | ON  | 396.59 | ON  | 372.28 | ON  | 375.26 |
| 5127 | psymb | ?-SMB20447       | CDS | 457381 | 458589 + | 30 | 30 | ON  | 360.81 | ON  | 384.38 | NIL | 316.47 | ON  | 379.33 | NIL | 364.04 |
| 5128 | psymb | ?-SMB20448       | CDS | 458865 | 460559 + | 30 | 30 | ON  | 376.06 | ON  | 363.5  | NIL | 268.07 | ON  | 326.49 | NIL | 297.02 |
| 5129 | psymb | ?-SMB20449       | CDS | 460635 | 461153 + | 30 | 30 | ON  | 339.34 | ON  | 379.19 | NIL | 329.85 | ON  | 369.64 | NIL | 350.97 |
| 5130 | psymb | ?-SMB20450       | CDS | 461270 | 462328 + | 30 | 30 | ON  | 316.45 | ON  | 336.4  | NIL | 326.75 | ON  | 362.53 | NIL | 303.71 |
| 5131 | psymb | ?-SMB20451       | CDS | 464490 | 465253 + | 30 | 30 | ON  | 361.02 | ON  | 373.43 | NIL | 305.34 | ON  | 369.4  | NIL | 335.46 |
| 5132 | psymb | ?-SMB20452       | CDS | 465268 | 465604 + | 30 | 30 | ON  | 329.94 | ON  | 332.35 | NIL | 304.68 | NIL | 330.09 | NIL | 343.11 |
| 5133 | psymb | ?-SMB20453       | CDS | 465642 | 466553 - | 30 | 30 | ON  | 285.33 | NIL | 310.69 | NIL | 356.54 | NIL | 304.55 | NIL | 267.33 |
| 5134 | psymb | ?-SMB20454       | CDS | 466834 | 467253 - | 30 | 30 | ON  | 303.57 | NIL | 312.68 | NIL | 319.9  | NIL | 292.18 | NIL | 314.2  |
| 5135 | psymb | ?-SMB20455       | CDS | 467358 | 467972 - | 30 | 30 | NIL | 301.79 | NIL | 316.99 | NIL | 336.83 | NIL | 323.5  | NIL | 319.78 |
| 5136 | psymb | ?-SMB20456       | CDS | 468077 | 468823 + | 30 | 30 | ON  | 433.63 | ON  | 341.28 | ON  | 383.03 | ON  | 370.17 | NIL | 358.47 |
| 5137 | psymb | ?-SMB20457       | CDS | 468904 | 470052 - | 30 | 30 | NIL | 309.42 | ON  | 367.01 | NIL | 358.75 | ON  | 354.47 | NIL | 375.91 |
| 5138 | psymb | ?-SMB20458       | CDS | 470412 | 471458 + | 30 | 30 | ON  | 348.16 | ON  | 361.66 | NIL | 334.59 | ON  | 337.53 | NIL | 342.07 |
| 5139 | psymb | ?-SMB20459       | CDS | 471458 | 472444 + | 30 | 30 | NIL | 294.9  | NIL | 289.27 | NIL | 321.48 | NIL | 308.6  | NIL | 334.09 |
| 5140 | psymb | ?-SMB20460       | CDS | 472441 | 474306 + | 30 | 30 | NIL | 295.23 | NIL | 304.03 | NIL | 295.66 | ON  | 343.53 | ON  | 404.11 |
| 5141 | psymb | ?-SMB20461       | CDS | 474317 | 474925 + | 30 | 30 | ON  | 337.1  | ON  | 327.27 | ON  | 424.93 | ON  | 379.4  | ON  | 404.11 |
| 5142 | psymb | ?-SMB20462       | CDS | 474822 | 475899 + | 30 | 30 | ON  | 334.55 | ON  | 330.39 | NIL | 352.63 | ON  | 361.97 | NIL | 333.35 |
| 5143 | psymb | ?-SMB20463       | CDS | 475899 | 476408 + | 30 | 30 | ON  | 394.64 | ON  | 360.89 | NIL | 436.6  | ON  | 420.25 | NIL | 418.98 |
| 5144 | psymb | ?-SMB20464       | CDS | 476897 | 476899 - | 30 | 30 | ON  | 404.15 | ON  | 487.48 | NIL | 373.4  | ON  | 509.44 | NIL | 365.29 |
| 5145 | psymb | ?-SMB20465       | CDS | 477065 | 478135 - | 30 | 30 | ON  | 334.77 | NIL | 316.96 | NIL | 359.94 | NIL | 325.79 | NIL | 309.46 |
| 5146 | psymb | ?-SMB20466       | CDS | 479467 | 479467 + | 30 | 30 | NIL | 360.83 | NIL | 333.25 | NIL | 358.7  | ON  | 395.38 | NIL | 297.18 |
| 5147 | psymb | ?-SMB20467       | CDS | 479716 | 481539 + | 30 | 30 | NIL | 267.41 | NIL | 278.1  | NIL | 276.36 | NIL | 301.56 | NIL | 259.88 |
| 5148 | psymb | ?-SMB20468       | CDS | 481536 | 482180 + | 30 | 30 | NIL | 307.56 | NIL | 312.31 | NIL | 295.41 | ON  | 297.47 | NIL | 297.47 |
| 5149 | psymb | ?-SMB20469       | CDS | 482210 | 483286 - | 30 | 30 | NIL | 304.3  | ON  | 354.76 | NIL | 336.78 | ON  | 354.43 | NIL | 293.79 |
| 5150 | psymb | ?-SMB20470       | CDS | 483286 | 484386 + | 30 | 30 | NIL | 281.42 | ON  | 323.94 | NIL | 253.81 | NIL | 315.87 | NIL | 263.95 |
| 5151 | psymb | ?-SMB20471       | CDS | 484386 | 484566 + | 30 | 30 | NIL | 256.33 | NIL | 265.01 | NIL | 276    | NIL | 303.73 | NIL | 279.78 |
| 5152 | psymb | ?-SMB20472       | CDS | 484417 | 486412 + | 30 | 30 | NIL | 319.55 | ON  | 376.59 | NIL | 312.31 | NIL | 319.49 | NIL | 340.1  |
| 5153 | psymb | ?-SMB20473       | CDS | 486727 | 487224 - | 30 | 30 | NIL | 319.04 | NIL | 316.91 | NIL | 301.27 | NIL | 304.72 | NIL | 321.93 |
| 5154 | psymb | ?-SMB20474       | CDS | 487781 | 488002 - | 32 | 32 | NIL | 282.76 | NIL | 274.53 | NIL | 305.75 | NIL | 275.85 | NIL | 298.28 |
| 5155 | psymb | ?-SMB20475       | CDS | 487989 | 489483 - | 30 | 30 | ON  | 344.16 | NIL | 300.02 | NIL | 350.09 | NIL | 327.9  | NIL | 334.19 |
| 5156 | psymb | ?-SMB20476       | CDS | 488823 | 490388 + | 30 | 30 | ON  | 321.83 | NIL | 645.76 | ON  | 480.88 | ON  | 634.92 | ON  | 477.76 |
| 5157 | psymb | ?-SMB20477       | CDS | 490466 | 491413 + | 30 | 30 | NIL | 290.06 | NIL | 322.19 | NIL | 331.01 | ON  | 342.2  | ON  | 380.07 |
| 5158 | psymb | ?-SMB20478       | CDS | 491410 | 493212 + | 30 | 30 | ON  | 432.61 | ON  | 452.78 | ON  | 416.05 | ON  | 459.06 | ON  | 403.03 |
| 5159 | psymb | ?-SMB20479       | CDS | 493209 | 494006 + | 30 | 30 | ON  | 346.9  | ON  | 451.05 | ON  | 410.35 | ON  | 399.57 | ON  | 394.74 |
| 5160 | psymb | ?-SMB20480       | CDS | 494013 | 494795 + | 40 | 40 | ON  | 305.91 | ON  | 426.75 | ON  | 332.85 | ON  | 331.57 | ON  | 313.85 |
| 5161 | psymb | asno-SMB20481    | CDS | 494919 | 496694 + | 30 | 30 | ON  | 335.75 | ON  | 426.75 | ON  | 331.16 | ON  | 375.45 | ON  | 335.49 |
| 5162 | psymb | ?-SMB20482       | CDS | 496696 | 498483 + | 30 | 30 | ON  | 315.55 | ON  | 390.16 | NIL | 363.84 | ON  | 360.5  | ON  | 379.11 |
| 5163 | psymb | ?-SMB20483       | CDS | 498491 | 499561 - | 30 | 30 | ON  | 334.88 | ON  | 347.08 | ON  | 381.64 | NIL | 331.84 | NIL | 318.8  |
| 5164 | psymb | ?-SMB20484       | CDS | 499835 | 500827 + | 30 | 30 | ON  | 330.43 | ON  | 289.21 | ON  | 325.53 | ON  | 293.02 | NIL | 329.43 |
| 5165 | psymb | ?-SMB20485       | CDS | 500933 | 502462 + | 30 | 30 | ON  | 299.61 | ON  | 289.21 | ON  | 325.53 | ON  | 293.02 | NIL | 297.47 |
| 5166 | psymb | ?-SMB20486       | CDS | 502455 | 503456 + | 30 | 30 | NIL | 271.98 | NIL | 286.65 | NIL | 247.2  | ON  | 257.06 | NIL | 310.98 |
| 5167 | psymb | ?-SMB20487       | CDS | 503453 | 504451 + | 30 | 30 | NIL | 364.77 | ON  | 374.06 | NIL | 307.65 | ON  | 353.17 | NIL | 339.22 |
| 5168 | psymb | ?-SMB20488       | CDS | 504454 | 505302 + | 30 | 30 | NIL | 296.29 | NIL | 330.55 | NIL | 342.01 | NIL | 318.54 | NIL | 285.45 |
| 5169 | psymb | ?-SMB20489       | CDS | 505347 | 506819 + | 30 | 30 | NIL | 288.18 | NIL | 309.29 | NIL | 290.2  | NIL | 312.14 | NIL | 323.88 |
| 5170 | psymb | lucA?-SMB20490   | CDS | 506812 | 507510 + | 30 | 30 | ON  | 395.58 | ON  | 364.68 | NIL | 354.51 | NIL | 381.5  | NIL | 332.83 |
| 5171 | psymb | ?-SMB20491       | CDS | 509667 | 509245 - | 30 | 30 | NIL | 245.8  | NIL | 242.81 | NIL | 321.58 | NIL | 265.95 | NIL | 267.83 |
| 5172 | psymb | ?-SMB20492       | CDS | 509667 | 510469 - | 30 | 30 | ON  | 340.83 | ON  | 366.69 | NIL | 375.4  | ON  | 351.85 | NIL | 352.26 |
| 5173 | psymb | ?-SMB20493       | CDS | 510584 | 511318 - | 30 | 30 | ON  | 322.7  | NIL | 315.77 | ON  | 404.61 | ON  | 383.43 | NIL | 346.65 |
| 5174 | psymb | ?-SMB20494       | CDS | 511441 | 512337 + | 30 | 30 | ON  | 313.84 | ON  | 338.98 | NIL | 307.94 | NIL | 330.75 | NIL | 303.39 |

|            |               |     |          |          |    |    |     |        |     |        |     |        |     |        |     |        |
|------------|---------------|-----|----------|----------|----|----|-----|--------|-----|--------|-----|--------|-----|--------|-----|--------|
| 5175 pSyMB | 7. SMB20495   | CDS | 513218   | 514921 + | 30 | 30 | NIL | 314.68 | NIL | 313.76 | NIL | 326.67 | NIL | 339.15 | NIL | 382    |
| 5176 pSyMB | 7. SMB20496   | CDS | 515554   | 515964 - | 30 | 30 | NIL | 290.64 | NIL | 315.94 | NIL | 328.91 | NIL | 295.2  | NIL | 381    |
| 5177 pSyMB | lvx.SMB20497  | CDS | 516973   | 518902 - | 30 | 30 | NIL | 297.43 | NIL | 314.55 | NIL | 339.28 | ON  | 361.41 | NIL | 380    |
| 5178 pSyMB | 7. SMB20498   | CDS | 518533   | 519375 - | 30 | 30 | ON  | 315.36 | NIL | 313.03 | ON  | 377.21 | ON  | 349.22 | NIL | 351.38 |
| 5179 pSyMB | 7. SMB20499   | CDS | 519442   | 521175 - | 30 | 30 | ON  | 316.06 | ON  | 321.68 | NIL | 371.98 | ON  | 371.98 | NIL | 338.2  |
| 5180 pSyMB | 7. SMB20500   | CDS | 521187   | 522182 - | 30 | 30 | NIL | 310.38 | NIL | 324.47 | NIL | 335.76 | NIL | 318.54 | ON  | 319.88 |
| 5181 pSyMB | 7. SMB20501   | CDS | 522179   | 523159 - | 30 | 30 | NIL | 377.41 | ON  | 324.36 | NIL | 346.49 | ON  | 297.39 | NIL | 315.38 |
| 5182 pSyMB | 7. SMB20502   | CDS | 523185   | 524177 - | 30 | 30 | NIL | 266.54 | NIL | 261.31 | NIL | 309.77 | NIL | 288.12 | NIL | 325.67 |
| 5183 pSyMB | 7. SMB20503   | CDS | 524197   | 525135 - | 30 | 30 | NIL | 307.77 | ON  | 352.38 | NIL | 310.17 | NIL | 299.39 | NIL | 319.88 |
| 5184 pSyMB | 7. SMB20504   | CDS | 525801   | 526802   | 30 | 30 | NIL | 298.19 | NIL | 313.2  | NIL | 329.2  | NIL | 327.9  | ON  | 328.83 |
| 5185 pSyMB | fxG.SMB20505  | CDS | 527073   | 527861 + | 30 | 30 | NIL | 330.03 | ON  | 347.21 | NIL | 377.18 | NIL | 333.68 | ON  | 405.09 |
| 5186 pSyMB | 7. SMB20506   | CDS | 527905   | 528858 - | 30 | 30 | NIL | 280.45 | NIL | 281.11 | NIL | 305.04 | NIL | 309.07 | NIL | 323.28 |
| 5187 pSyMB | 7. SMB20507   | CDS | 530452   | 530387 - | 30 | 30 | ON  | 395.73 | NIL | 352.05 | NIL | 379.02 | ON  | 384.24 | NIL | 395.07 |
| 5188 pSyMB | 7. SMB20508   | CDS | 531624   | 531435 - | 30 | 30 | ON  | 349.64 | NIL | 339.8  | ON  | 399.47 | ON  | 353.36 | NIL | 371.3  |
| 5189 pSyMB | 7. SMB20509   | CDS | 532438   | 532391 + | 30 | 30 | ON  | 414.42 | ON  | 311.17 | ON  | 389.45 | ON  | 347.54 | ON  | 386.37 |
| 5190 pSyMB | dpqa.SMB20510 | CDS | 532438   | 533586 + | 30 | 30 | ON  | 414.42 | ON  | 299.65 | NIL | 383.95 | ON  | 347.54 | NIL | 364.73 |
| 5191 pSyMB | 7. SMB20511   | CDS | 533617   | 534396 + | 30 | 30 | ON  | 335.73 | NIL | 299.65 | NIL | 328.24 | NIL | 310.16 | NIL | 308.81 |
| 5192 pSyMB | 7. SMB20512   | CDS | 535094   | 536020 + | 30 | 30 | ON  | 288.09 | NIL | 292.18 | NIL | 320.62 | NIL | 280.24 | NIL | 313.05 |
| 5193 pSyMB | 7. SMB20513   | CDS | 536420   | 537637 - | 30 | 30 | NIL | 273.98 | NIL | 281.62 | NIL | 285.25 | NIL | 302.98 | NIL | 301.71 |
| 5194 pSyMB | 7. SMB20514   | CDS | 541212   | 541606 + | 30 | 30 | NIL | 309.75 | ON  | 327.72 | NIL | 284.06 | NIL | 361.7  | NIL | 327.61 |
| 5195 pSyMB | 7. SMB20515   | CDS | 541280   | 541606 + | 30 | 30 | ON  | 333.47 | ON  | 327.36 | NIL | 348.54 | NIL | 339.6  | NIL | 354.61 |
| 5196 pSyMB | 7. SMB20516   | CDS | 542357   | 542647 - | 30 | 26 | NIL | 313.32 | NIL | 316.59 | NIL | 324.79 | NIL | 308.53 | NIL | 322.67 |
| 5197 pSyMB | 7. SMB20517   | CDS | 542829   | 543548 + | 30 | 29 | ON  | 333.1  | ON  | 335.93 | NIL | 385.94 | NIL | 332.88 | NIL | 320.59 |
| 5198 pSyMB | 7. SMB20518   | CDS | 543981   | 544349 + | 30 | 30 | NIL | 331.64 | NIL | 322.24 | ON  | 370.1  | NIL | 357.9  | NIL | 341.07 |
| 5199 pSyMB | 7. SMB20519   | CDS | 546127   | 546977   | 30 | 30 | NIL | 278.69 | NIL | 280.89 | NIL | 332.54 | NIL | 296.45 | NIL | 319.98 |
| 5200 pSyMB | 7. SMB20520   | CDS | 546977   | 548086 + | 30 | 30 | ON  | 316.68 | NIL | 295.77 | NIL | 300.35 | NIL | 285.58 | NIL | 288.25 |
| 5201 pSyMB | 7. SMB20521   | CDS | 548378   | 548746 + | 30 | 30 | NIL | 297.17 | NIL | 291.52 | NIL | 321.01 | NIL | 303.96 | NIL | 298.15 |
| 5202 pSyMB | 7. SMB20522   | CDS | 549220   | 550428 - | 30 | 30 | NIL | 358.61 | NIL | 311.1  | ON  | 389.34 | ON  | 399.1  | NIL | 347.25 |
| 5203 pSyMB | 7. SMB20523   | CDS | 550946   | 551554 + | 30 | 30 | NIL | 305.67 | NIL | 320.42 | NIL | 293.26 | ON  | 339.78 | NIL | 309.58 |
| 5204 pSyMB | 7. SMB20524   | CDS | 552144   | 552578 - | 30 | 30 | NIL | 280.16 | NIL | 318.45 | NIL | 292.83 | NIL | 264.86 | NIL | 284.64 |
| 5205 pSyMB | 7. SMB20525   | CDS | 552458   | 552558 - | 30 | 30 | NIL | 314.97 | NIL | 318.45 | NIL | 332.18 | NIL | 350.4  | NIL | 312.76 |
| 5206 pSyMB | 7. SMB20526   | CDS | 553437   | 553458 - | 30 | 30 | NIL | 294.32 | ON  | 348.84 | NIL | 340.14 | ON  | 342.91 | NIL | 365.09 |
| 5207 pSyMB | 7. SMB20527   | CDS | 554374   | 554374 - | 30 | 30 | NIL | 298.37 | NIL | 278.77 | ON  | 389.52 | ON  | 363.88 | NIL | 314.99 |
| 5208 pSyMB | 7. SMB20528   | CDS | 554407   | 554745 - | 30 | 30 | NIL | 299.01 | NIL | 306.5  | NIL | 314.34 | NIL | 295.76 | NIL | 372.18 |
| 5209 pSyMB | 7. SMB20529   | CDS | 554980   | 555516 + | 30 | 30 | NIL | 309.64 | NIL | 324.02 | NIL | 392.87 | NIL | 323.47 | NIL | 324.68 |
| 5210 pSyMB | 7. SMB20530   | CDS | 555518   | 555615 + | 30 | 30 | NIL | 256.51 | NIL | 286.63 | NIL | 336.93 | NIL | 310.49 | NIL | 302.16 |
| 5211 pSyMB | 7. SMB20531   | CDS | 556745   | 556948   | 30 | 30 | NIL | 329.56 | ON  | 376.46 | NIL | 330.93 | NIL | 277.54 | NIL | 282.47 |
| 5212 pSyMB | 7. SMB20532   | CDS | 557553   | 558362 - | 30 | 31 | ON  | 370.52 | ON  | 351.5  | NIL | 351.93 | NIL | 395.77 | NIL | 332.22 |
| 5213 pSyMB | 7. SMB20533   | CDS | 558359   | 559629   | 30 | 30 | ON  | 349.63 | ON  | 391.88 | NIL | 308.19 | NIL | 325.64 | NIL | 329.98 |
| 5214 pSyMB | 7. SMB20534   | CDS | 559366   | 561219 - | 30 | 30 | ON  | 315.94 | NIL | 302.37 | NIL | 306.25 | NIL | 316.04 | NIL | 325.56 |
| 5215 pSyMB | 7. SMB20535   | CDS | 561216   | 562244 - | 30 | 30 | ON  | 377.85 | NIL | 375.51 | ON  | 397.22 | ON  | 399.87 | NIL | 409.18 |
| 5216 pSyMB | 7. SMB20536   | CDS | 562392   | 563678 + | 30 | 30 | NIL | 250.7  | NIL | 268.75 | NIL | 296.4  | NIL | 296.07 | NIL | 332.01 |
| 5217 pSyMB | qMf6.SMB20539 | CDS | 564786   | 566660 + | 30 | 30 | NIL | 354.53 | ON  | 345.6  | NIL | 315.27 | ON  | 337.82 | NIL | 297.5  |
| 5218 pSyMB | 7. SMB20540   | CDS | 567328   | 567749 + | 30 | 30 | ON  | 359.21 | ON  | 360.42 | ON  | 436.07 | ON  | 385.02 | ON  | 367.94 |
| 5219 pSyMB | 7. SMB20541   | CDS | 568337   | 569989 - | 43 | 30 | ON  | 353.29 | ON  | 321.41 | ON  | 399.93 | ON  | 404.56 | NIL | 379.75 |
| 5220 pSyMB | 7. SMB20542   | CDS | 570052   | 570405 - | 37 | 2  | ON  | 329.25 | ON  | 384.45 | NIL | 358.86 | ON  | 388.65 | NIL | 316.93 |
| 5221 pSyMB | 7. SMB20543   | CDS | 570289   | 570705 + | 32 | 0  | ON  | 303.36 | ON  | 345.55 | NIL | 375.39 | NIL | 333.88 | NIL | 327.99 |
| 5222 pSyMB | 7. SMB20544   | CDS | 570402   | 570845 - | 30 | 30 | NIL | 413.42 | ON  | 433.08 | NIL | 287.57 | NIL | 336.64 | NIL | 327.4  |
| 5223 pSyMB | 7. SMB20545   | CDS | 571438   | 571656 - | 30 | 30 | ON  | 311.21 | ON  | 344.85 | NIL | 297.72 | NIL | 278.3  | NIL | 266.41 |
| 5224 pSyMB | 7. SMB20546   | CDS | 572183   | 572261 - | 30 | 30 | NIL | 258.93 | NIL | 259.23 | NIL | 294.96 | NIL | 292.03 | NIL | 294.36 |
| 5225 pSyMB | 7. SMB20547   | CDS | 572518   | 572796 - | 30 | 30 | NIL | 319.42 | NIL | 287.83 | NIL | 348.88 | NIL | 292.03 | NIL | 312.04 |
| 5226 pSyMB | 7. SMB20548   | CDS | 573930   | 574424 + | 30 | 30 | NIL | 284.26 | NIL | 319.01 | NIL | 288.59 | NIL | 267.28 | NIL | 275.98 |
| 5227 pSyMB | 7. SMB20549   | CDS | 576365   | 576365 + | 30 | 30 | NIL | 300.97 | NIL | 314.82 | NIL | 328.96 | NIL | 328.9  | NIL | 324.31 |
| 5228 pSyMB | 7. SMB20550   | CDS | 576533   | 576778 - | 30 | 30 | NIL | 275.68 | NIL | 251.79 | NIL | 291.74 | NIL | 288.8  | NIL | 283.13 |
| 5229 pSyMB | 7. SMB20551   | CDS | 576952   | 577398 - | 30 | 30 | NIL | 266.11 | ON  | 343.26 | NIL | 265.11 | ON  | 362.31 | NIL | 298.38 |
| 5230 pSyMB | 7. SMB20552   | CDS | 578150   | 578881 + | 30 | 30 | NIL | 229.9  | NIL | 284.14 | NIL | 255.34 | NIL | 264.19 | NIL | 275.23 |
| 5231 pSyMB | 7. SMB20553   | CDS | 579002   | 579096 + | 30 | 30 | NIL | 314.12 | ON  | 284.14 | NIL | 329.32 | NIL | 328.28 | NIL | 330.31 |
| 5232 pSyMB | 7. SMB20554   | CDS | 579454   | 579963 - | 30 | 30 | NIL | 311.34 | NIL | 292.28 | NIL | 371.79 | NIL | 359.02 | NIL | 370.14 |
| 5233 pSyMB | 7. SMB20555   | CDS | 579647   | 580188 - | 30 | 30 | NIL | 498.62 | NIL | 251.65 | NIL | 230.87 | NIL | 323.1  | NIL | 285.84 |
| 5234 pSyMB | 7. SMB20556   | CDS | 581065   | 581325 + | 30 | 30 | NIL | 252.63 | NIL | 315.99 | NIL | 269.66 | NIL | 280.44 | NIL | 350.08 |
| 5235 pSyMB | 7. SMB20557   | CDS | 582370   | 582707 - | 30 | 30 | NIL | 271.41 | NIL | 278.82 | NIL | 313.19 | NIL | 270.2  | NIL | 324.02 |
| 5236 pSyMB | 7. SMB20558   | CDS | 583428   | 583769 - | 30 | 30 | NIL | 278.17 | NIL | 298.78 | NIL | 353.12 | ON  | 358.21 | NIL | 311.95 |
| 5237 pSyMB | 7. SMB20559   | CDS | 584145   | 584555 + | 30 | 30 | NIL | 286.68 | NIL | 290.09 | NIL | 323.53 | ON  | 342.59 | NIL | 375.66 |
| 5238 pSyMB | 7. SMB20560   | CDS | 584682   | 584903 + | 30 | 30 | NIL | 289.66 | NIL | 329.84 | NIL | 295.51 | NIL | 319.59 | NIL | 332.27 |
| 5239 pSyMB | 7. SMB20561   | CDS | 585597   | 586055 - | 30 | 30 | NIL | 281.8  | ON  | 290.84 | NIL | 291.57 | NIL | 334.21 | NIL | 329.3  |
| 5240 pSyMB | 7. SMB20562   | CDS | 586186   | 587100 - | 30 | 30 | NIL | 285.65 | NIL | 284.41 | NIL | 291.57 | NIL | 315.72 | NIL | 302.04 |
| 5241 pSyMB | 7. SMB20563   | CDS | 5897215  | 589129 - | 30 | 30 | NIL | 269.56 | NIL | 299.67 | NIL | 314.5  | NIL | 287.68 | NIL | 308.9  |
| 5242 pSyMB | Kd83.SMB20803 | CDS | 588360   | 589190 + | 30 | 30 | NIL | 269.56 | NIL | 289.1  | NIL | 291.69 | NIL | 323.57 | NIL | 287.17 |
| 5243 pSyMB | 7. SMB20804   | CDS | 589233   | 589964 + | 30 | 30 | NIL | 301.7  | NIL | 289.1  | NIL | 314.5  | NIL | 323.57 | NIL | 317.17 |
| 5244 pSyMB | 7. SMB20805   | CDS | 590027   | 590932 + | 30 | 30 | NIL | 296.7  | ON  | 334.83 | NIL | 336.45 | NIL | 298.65 | NIL | 317.17 |
| 5245 pSyMB | 7. SMB20806   | CDS | 591060   | 591742 + | 30 | 30 | ON  | 373.43 | ON  | 481.42 | ON  | 410.07 | ON  | 383.01 | NIL | 317.12 |
| 5246 pSyMB | 7. SMB20807   | CDS | 591882   | 593519 + | 30 | 30 | ON  | 331.37 | NIL | 311.33 | NIL | 281.92 | NIL | 291.32 | NIL | 286.82 |
| 5247 pSyMB | 7. SMB20808   | CDS | 594271 - | 594271 - | 30 | 30 | ON  | 349.6  | ON  | 400.5  | NIL | 299.73 | ON  | 383.67 | NIL | 323.27 |

|            |                    |     |          |          |    |    |     |        |     |        |     |        |     |        |     |        |
|------------|--------------------|-----|----------|----------|----|----|-----|--------|-----|--------|-----|--------|-----|--------|-----|--------|
| 5247 pSymB | KpF1: SMB20809     | CDS | 594508   | 595497 + | 30 | 30 | NIL | 274.55 | NIL | 308.52 | NIL | 326.87 | NIL | 328.79 | NIL | 278.62 |
| 5248 pSymB | ?_SMB20810         | CDS | 595610   | 595743 + | 30 | 30 | NIL | 336.9  | NIL | 303.53 | NIL | 297    | NIL | 328.04 | NIL | 272.28 |
| 5249 pSymB | ?_SMB20811         | CDS | 597789   | 598109 + | 30 | 30 | NIL | 271.51 | NIL | 418.19 | NIL | 272.04 | ON  | 352.25 | NIL | 275.58 |
| 5250 pSymB | ?_SMB20812         | CDS | 598175   | 599221 + | 30 | 30 | NIL | 250.83 | NIL | 304.79 | NIL | 263.54 | NIL | 372.84 | NIL | 277.86 |
| 5251 pSymB | msbA1: SMB20813    | CDS | 598634   | 601657 + | 30 | 30 | NIL | 314.06 | NIL | 325.87 | NIL | 296.45 | ON  | 327.82 | NIL | 321.32 |
| 5252 pSymB | ?_SMB20814         | CDS | 602735   | 602733 + | 30 | 30 | NIL | 270.43 | ON  | 347.48 | NIL | 338.88 | ON  | 354.04 | ON  | 336.58 |
| 5253 pSymB | ?_SMB20815         | CDS | 602786   | 604453 + | 30 | 30 | NIL | 316.66 | ON  | 412.16 | ON  | 402.65 | NIL | 326.45 | NIL | 422.46 |
| 5254 pSymB | ?_SMB20816         | CDS | 604519   | 605808 - | 30 | 30 | ON  | 357.19 | ON  | 405.33 | NIL | 349.03 | ON  | 344.99 | NIL | 335.66 |
| 5255 pSymB | ?_SMB20817         | CDS | 605893   | 606924 - | 30 | 30 | ON  | 335.87 | ON  | 399.42 | NIL | 315.55 | NIL | 298.25 | NIL | 323.83 |
| 5256 pSymB | moCD: SMB20818     | CDS | 607061   | 608221 + | 30 | 30 | NIL | 281.52 | NIL | 286.26 | NIL | 315.14 | NIL | 299.15 | NIL | 303.5  |
| 5257 pSymB | moEF: SMB20819     | CDS | 608264   | 608581 + | 30 | 30 | NIL | 335.99 | ON  | 300.48 | ON  | 377.46 | NIL | 333.51 | NIL | 315.72 |
| 5258 pSymB | moEF: SMB20820     | CDS | 608691   | 609920 + | 30 | 30 | NIL | 294.54 | ON  | 328.33 | ON  | 359.61 | NIL | 341.74 | NIL | 368.9  |
| 5259 pSymB | ?_SMB20821         | CDS | 610001   | 610801 + | 30 | 30 | NIL | 316.22 | ON  | 300.77 | ON  | 393.1  | ON  | 344.48 | NIL | 345.27 |
| 5260 pSymB | KpT2: SMB20822     | CDS | 611044   | 611870 + | 30 | 30 | ON  | 312.63 | NIL | 280.06 | NIL | 267.7  | NIL | 281.06 | NIL | 296.64 |
| 5261 pSymB | KpT2: SMB20823     | CDS | 611880   | 612911 + | 30 | 30 | ON  | 546.93 | NIL | 427.09 | NIL | 353.3  | ON  | 366.27 | NIL | 349.3  |
| 5262 pSymB | ?_SMB20824         | CDS | 613522   | 615859 - | 30 | 30 | ON  | 738.66 | ON  | 713.22 | ON  | 490.64 | ON  | 472.09 | ON  | 446.97 |
| 5263 pSymB | ?_SMB20825         | CDS | 616023   | 616793 + | 30 | 30 | ON  | 718.28 | ON  | 382.82 | NIL | 309.19 | ON  | 357.57 | NIL | 322.05 |
| 5264 pSymB | ?_SMB20826         | CDS | 616861   | 617394 + | 30 | 30 | ON  | 359.97 | ON  | 328.06 | ON  | 454.01 | ON  | 426.25 | ON  | 477.84 |
| 5265 pSymB | ?_SMB20827         | CDS | 617618   | 618205 + | 30 | 30 | NIL | 223.21 | NIL | 261.46 | NIL | 277.21 | NIL | 246.13 | NIL | 283.53 |
| 5266 pSymB | ?_SMB20828         | CDS | 617618   | 618205 + | 30 | 30 | ON  | 335.84 | ON  | 328.1  | ON  | 414.62 | ON  | 400.47 | NIL | 360.94 |
| 5267 pSymB | ?_SMB20828         | CDS | 618700   | 619704 + | 30 | 30 | ON  | 345.55 | ON  | 334.24 | ON  | 455.59 | ON  | 377.47 | ON  | 410.25 |
| 5268 pSymB | ?_SMB21663         | CDS | 619216   | 619485 + | 30 | 30 | NIL | 300.26 | ON  | 326.29 | NIL | 306.75 | NIL | 304.68 | NIL | 289.48 |
| 5269 pSymB | ?_SMB21665         | CDS | 619543   | 619899 + | 30 | 30 | NIL | 270.26 | NIL | 274.43 | NIL | 359.8  | NIL | 338.91 | NIL | 356.51 |
| 5270 pSymB | ?_SMB21665         | CDS | 619943   | 621625 - | 30 | 30 | NIL | 284.42 | NIL | 265.9  | NIL | 298.57 | NIL | 307.98 | NIL | 284.34 |
| 5271 pSymB | KpF2: SMB20830     | CDS | 621885   | 622898 + | 38 | 15 | NIL | 437.52 | ON  | 341.85 | NIL | 313.01 | NIL | 319.25 | NIL | 337.57 |
| 5272 pSymB | KpR/KpFE: SMB20831 | CDS | 622973   | 623926 - | 30 | 30 | ON  | 532.62 | ON  | 555.99 | NIL | 468.84 | ON  | 544.76 | ON  | 386.6  |
| 5273 pSymB | KpR: SMB20832      | CDS | 624306   | 624965 - | 30 | 30 | ON  | 377.5  | ON  | 342.78 | NIL | 315.14 | ON  | 404.35 | NIL | 343.93 |
| 5274 pSymB | KpT1: SMB20833     | CDS | 624962   | 625741 - | 30 | 31 | NIL | 311.15 | NIL | 316.56 | NIL | 246.22 | NIL | 277.8  | NIL | 283.36 |
| 5275 pSymB | KpT1: SMB20834     | CDS | 625738   | 627036 - | 30 | 30 | ON  | 430.14 | ON  | 482.48 | NIL | 377.23 | ON  | 358.38 | NIL | 326.3  |
| 5276 pSymB | ?_SMB20835         | CDS | 627125   | 628120 - | 33 | 33 | ON  | 400.01 | ON  | 456.36 | NIL | 309.21 | NIL | 328.4  | NIL | 346.24 |
| 5277 pSymB | ?_SMB20836         | CDS | 628101   | 628430 - | 30 | 30 | NIL | 239.33 | NIL | 262.2  | NIL | 264.62 | NIL | 257.11 | NIL | 267.18 |
| 5278 pSymB | ?_SMB20837         | CDS | 628971   | 629195 - | 30 | 23 | ON  | 334.31 | NIL | 303.87 | NIL | 339.93 | NIL | 316.65 | NIL | 360.95 |
| 5279 pSymB | ?_SMB20838         | CDS | 629245   | 630306 - | 39 | 0  | ON  | 333.24 | NIL | 308.98 | ON  | 441.36 | ON  | 388.49 | NIL | 318.15 |
| 5280 pSymB | ?_SMB20839         | CDS | 630969   | 631178 + | 30 | 29 | NIL | 320.27 | NIL | 291.19 | ON  | 451.77 | ON  | 368.66 | NIL | 361.82 |
| 5281 pSymB | ?_SMB20840         | CDS | 631205   | 631897 - | 31 | 6  | NIL | 292.54 | ON  | 404.93 | NIL | 284.98 | NIL | 298.27 | NIL | 307.36 |
| 5282 pSymB | ?_SMB20841         | CDS | 631879   | 633267 - | 39 | 7  | ON  | 372.74 | ON  | 391.66 | ON  | 390.96 | ON  | 431.94 | ON  | 406.06 |
| 5283 pSymB | ?_SMB20842         | CDS | 633438   | 634647 - | 37 | 6  | NIL | 305.37 | ON  | 351.24 | NIL | 303.93 | ON  | 324.59 | NIL | 304.1  |
| 5284 pSymB | ?_SMB20843         | CDS | 634671   | 636197 - | 40 | 5  | NIL | 242.31 | NIL | 274.96 | NIL | 243.1  | NIL | 272.88 | NIL | 330.07 |
| 5285 pSymB | aiq1: SMB20843     | CDS | 636623   | 637090 - | 33 | 0  | NIL | 345.96 | ON  | 420.39 | NIL | 361.83 | ON  | 389.87 | NIL | 348.65 |
| 5286 pSymB | ?_SMB21013         | CDS | 637296   | 637676 - | 30 | 30 | NIL | 261.4  | NIL | 289.48 | NIL | 289.56 | NIL | 278.53 | NIL | 286.53 |
| 5287 pSymB | ?_SMB21015         | CDS | 639299   | 639299 - | 36 | 29 | NIL | 300.28 | ON  | 320.01 | ON  | 400.07 | ON  | 374.72 | NIL | 385.16 |
| 5288 pSymB | ?_SMB21016         | CDS | 639364   | 640395 - | 30 | 30 | NIL | 301.59 | ON  | 354.35 | NIL | 278.7  | NIL | 316.16 | NIL | 307.65 |
| 5289 pSymB | ?_SMB21017         | CDS | 640398   | 640395 - | 30 | 30 | ON  | 348.67 | ON  | 418.61 | NIL | 304.66 | NIL | 320.44 | NIL | 300.07 |
| 5290 pSymB | ?_SMB21018         | CDS | 641408   | 641411 - | 30 | 30 | ON  | 333.08 | NIL | 419.42 | NIL | 302.19 | NIL | 294.81 | NIL | 274.05 |
| 5291 pSymB | ?_SMB21019         | CDS | 643949   | 643949 - | 30 | 30 | ON  | 318.71 | ON  | 315.31 | ON  | 358.16 | ON  | 310.68 | ON  | 327.38 |
| 5292 pSymB | ?_SMB21021         | CDS | 644175   | 645122 + | 30 | 30 | ON  | 334.64 | ON  | 340.48 | NIL | 348.61 | ON  | 338.27 | NIL | 303.13 |
| 5293 pSymB | ?_SMB21022         | CDS | 645127   | 646725 + | 30 | 30 | NIL | 322.1  | NIL | 314.12 | ON  | 394.48 | ON  | 366.26 | ON  | 387.68 |
| 5294 pSymB | ?_SMB21023         | CDS | 646729   | 647043 + | 30 | 30 | NIL | 296.06 | NIL | 264.56 | NIL | 355.6  | NIL | 329.47 | NIL | 369.27 |
| 5295 pSymB | ?_SMB21024         | CDS | 647379 + | 647379 + | 30 | 29 | ON  | 358.54 | NIL | 317.86 | NIL | 311.27 | NIL | 324.37 | NIL | 308.42 |
| 5296 pSymB | ?_SMB21026         | CDS | 647391   | 647810 - | 30 | 29 | NIL | 244.85 | NIL | 261.45 | NIL | 257.63 | NIL | 237.83 | NIL | 278.79 |
| 5297 pSymB | ?_SMB21026         | CDS | 647954   | 648091 - | 30 | 29 | NIL | 292.65 | NIL | 278.01 | NIL | 304.46 | NIL | 287.25 | NIL | 351.5  |
| 5298 pSymB | ?_SMB21027         | CDS | 648788   | 649504 - | 30 | 30 | NIL | 269.62 | NIL | 296.89 | NIL | 289.19 | NIL | 283.32 | NIL | 333.32 |
| 5299 pSymB | ?_SMB21028         | CDS | 649719   | 649890 - | 30 | 30 | NIL | 216.33 | NIL | 240.19 | NIL | 219.31 | NIL | 234.59 | NIL | 258.08 |
| 5300 pSymB | ?_SMB21029         | CDS | 649978   | 650502 + | 30 | 30 | ON  | 327.63 | ON  | 388.48 | NIL | 317.67 | NIL | 330.17 | NIL | 342    |
| 5301 pSymB | ?_SMB21030         | CDS | 650647   | 651096 - | 30 | 30 | NIL | 306.44 | ON  | 372.14 | NIL | 370.95 | ON  | 355.36 | ON  | 393.69 |
| 5302 pSymB | ?_SMB21031         | CDS | 651108   | 651683 - | 30 | 30 | ON  | 322.47 | NIL | 320.82 | NIL | 356.78 | ON  | 348.9  | NIL | 359.64 |
| 5303 pSymB | ?_SMB21032         | CDS | 651740   | 652156 + | 30 | 30 | ON  | 326.3  | NIL | 370.93 | NIL | 375.8  | ON  | 348.9  | NIL | 359.64 |
| 5304 pSymB | ?_SMB21034         | CDS | 652300   | 652914 + | 30 | 30 | NIL | 219.25 | NIL | 234.17 | NIL | 235.62 | NIL | 235.48 | NIL | 257.26 |
| 5305 pSymB | ?_SMB21035         | CDS | 653380   | 653798 - | 30 | 30 | NIL | 424.35 | ON  | 372.27 | ON  | 395.68 | NIL | 315.17 | NIL | 357.27 |
| 5306 pSymB | ?_SMB21036         | CDS | 653937   | 654485 + | 30 | 30 | NIL | 255.34 | NIL | 256.49 | NIL | 285.52 | NIL | 273.49 | NIL | 315.03 |
| 5307 pSymB | ?_SMB21037         | CDS | 654648   | 656243 + | 30 | 30 | ON  | 356.23 | ON  | 334.43 | NIL | 345.88 | NIL | 375.62 | NIL | 335.24 |
| 5308 pSymB | ?_SMB21038         | CDS | 656250   | 657227 + | 30 | 30 | ON  | 316.67 | NIL | 319.75 | NIL | 328.91 | NIL | 309.66 | NIL | 304.07 |
| 5309 pSymB | ?_SMB21039         | CDS | 657241   | 658176 + | 30 | 30 | NIL | 303.64 | NIL | 309.31 | NIL | 338.88 | NIL | 285.03 | NIL | 312.26 |
| 5310 pSymB | ?_SMB21040         | CDS | 658713   | 659786 + | 30 | 30 | ON  | 383.61 | ON  | 397.74 | ON  | 377.31 | ON  | 380.51 | NIL | 367.64 |
| 5311 pSymB | ?_SMB21041         | CDS | 659874   | 661109 + | 30 | 30 | ON  | 344.63 | ON  | 334.73 | NIL | 369.72 | ON  | 349.13 | NIL | 327.54 |
| 5312 pSymB | pprT: SMB21042     | CDS | 661226   | 662467 + | 30 | 30 | NIL | 296.37 | ON  | 332.41 | NIL | 324.64 | NIL | 318.56 | NIL | 352.94 |
| 5313 pSymB | ?_SMB21043         | CDS | 663077   | 663846 + | 30 | 29 | NIL | 290.51 | NIL | 279.55 | NIL | 340.45 | NIL | 318.43 | NIL | 325.63 |
| 5314 pSymB | ?_SMB21044         | CDS | 663822   | 665732 - | 30 | 30 | NIL | 280.14 | NIL | 318.61 | NIL | 316.29 | NIL | 329.32 | NIL | 332.14 |
| 5315 pSymB | ?_SMB21695         | CDS | 666454   | 666726 - | 30 | 25 | ON  | 336.44 | ON  | 396.95 | NIL | 283.19 | NIL | 324.41 | NIL | 296.64 |
| 5316 pSymB | ?_SMB21698         | CDS | 667137   | 667616 - | 30 | 30 | NIL | 261.24 | NIL | 268.08 | NIL | 289.11 | NIL | 283.69 | NIL | 284.75 |
| 5317 pSymB | exo12: SMB21662    | CDS | 669834   | -        | 30 | 30 | NIL | 287.4  | NIL | 285.21 | NIL | 303.54 | NIL | 284.1  | ON  | 384.25 |
| 5318 pSymB | ?_SMB21696         | CDS | 672636   | 673517 + | 31 | 31 | ON  | 332.58 | NIL | 309.74 | ON  | 477.06 | ON  | 419.96 | ON  | 384.69 |

|      |       |                     |     |        |          |    |    |     |        |     |        |     |        |     |        |     |        |
|------|-------|---------------------|-----|--------|----------|----|----|-----|--------|-----|--------|-----|--------|-----|--------|-----|--------|
| 5319 | ψSymB | τ-SMB21697          | CDS | 673504 | 674031 + | 30 | 30 | NIL | 296.3  | NIL | 308.65 | NIL | 330.52 | NIL | 323.4  | NIL | 305.91 |
| 5320 | ψSymB | Trn10-1a-SMB21661   | CDS | 674972 | 674972 + | 30 | 30 | NIL | 257.07 | NIL | 269.18 | NIL | 329.22 | NIL | 300.34 | NIL | 329.29 |
| 5321 | ψSymB | Trn10-1b-1-SMB21711 | CDS | 674978 | 675028 + | 30 | 30 | ON  | 337.58 | NIL | 306.36 | ON  | 416.6  | NIL | 336.37 | NIL | 375.28 |
| 5322 | ψSymB | τ-SMB21045          | CDS | 675873 | 676832 + | 34 | 1  | ON  | 399.22 | ON  | 304.52 | NIL | 303.31 | NIL | 298.53 | NIL | 308.01 |
| 5324 | ψSymB | Trn10-1b-2-SMB21046 | CDS | 676973 | 677401 + | 30 | 30 | ON  | 350.72 | ON  | 344.49 | NIL | 334.55 | ON  | 378.4  | NIL | 372.99 |
| 5326 | ψSymB | τ-SMB21047          | CDS | 679669 | 680235 + | 30 | 30 | ON  | 243.46 | NIL | 233.89 | NIL | 290.92 | NIL | 259.69 | NIL | 309.84 |
| 5325 | ψSymB | τ-SMB21048          | CDS | 680367 | 680807 - | 30 | 30 | ON  | 315.5  | NIL | 317.36 | NIL | 324.09 | NIL | 309.46 | NIL | 302.55 |
| 5327 | ψSymB | wz1-SMB21050        | CDS | 681853 | 682011 - | 30 | 30 | NIL | 204.57 | NIL | 244.28 | NIL | 199.45 | NIL | 264.04 | NIL | 293.17 |
| 5328 | ψSymB | τ-SMB21051          | CDS | 682224 | 683277 + | 30 | 30 | NIL | 298.14 | NIL | 312.76 | NIL | 250    | NIL | 204.78 | NIL | 234.77 |
| 5329 | ψSymB | τ-SMB21052          | CDS | 683928 | 685277 - | 30 | 30 | NIL | 251.68 | NIL | 282.04 | NIL | 316.94 | NIL | 272.49 | NIL | 282.42 |
| 5330 | ψSymB | τ-SMB21053          | CDS | 685581 | 688716 + | 30 | 30 | NIL | 273.79 | NIL | 307.6  | NIL | 351.23 | NIL | 305.31 | NIL | 340.49 |
| 5331 | ψSymB | τ-SMB21054          | CDS | 686566 | 688522 - | 30 | 30 | NIL | 280.43 | NIL | 295.42 | NIL | 332.39 | NIL | 308.67 | NIL | 317.68 |
| 5332 | ψSymB | τ-SMB21055          | CDS | 688755 | 689739 - | 30 | 30 | NIL | 287.24 | NIL | 287.07 | NIL | 375.8  | NIL | 315.98 | NIL | 340.93 |
| 5333 | ψSymB | τ-SMB21056          | CDS | 689474 | 691801 - | 32 | 32 | ON  | 326.65 | NIL | 300.09 | NIL | 339.05 | ON  | 341.96 | NIL | 319.03 |
| 5334 | ψSymB | τ-SMB21057          | CDS | 691767 | 692645 - | 30 | 30 | ON  | 259.34 | NIL | 289.63 | NIL | 310.49 | NIL | 276.77 | NIL | 305.44 |
| 5335 | ψSymB | τ-SMB21058          | CDS | 692698 | 692919 + | 30 | 30 | NIL | 230    | NIL | 247.44 | NIL | 264.99 | NIL | 232.95 | NIL | 281.16 |
| 5336 | ψSymB | τ-SMB21059          | CDS | 692943 | 693467 + | 30 | 30 | NIL | 273.55 | NIL | 295.95 | NIL | 324.73 | NIL | 252.95 | NIL | 283.95 |
| 5337 | ψSymB | τ-SMB21060          | CDS | 693472 | 694521 + | 30 | 30 | NIL | 268.53 | NIL | 300.04 | NIL | 283.87 | NIL | 268.5  | NIL | 295.86 |
| 5338 | ψSymB | τ-SMB21061          | CDS | 694544 | 695791 + | 30 | 30 | NIL | 260.58 | NIL | 289.49 | NIL | 279.69 | NIL | 291.23 | NIL | 300.12 |
| 5339 | ψSymB | τ-SMB21062          | CDS | 695813 | 697012 + | 30 | 30 | NIL | 271.5  | NIL | 273.47 | NIL | 275.27 | NIL | 284.98 | NIL | 308.4  |
| 5340 | ψSymB | τ-SMB21063          | CDS | 697071 | 699172 + | 30 | 30 | ON  | 385.99 | ON  | 368.06 | NIL | 310.33 | NIL | 320.99 | NIL | 322.62 |
| 5341 | ψSymB | τ-SMB21064          | CDS | 698639 | 700165 - | 31 | 31 | NIL | 249.45 | NIL | 290.9  | NIL | 306.66 | NIL | 276.4  | NIL | 269.53 |
| 5342 | ψSymB | τ-SMB21065          | CDS | 699188 | 701115 - | 30 | 30 | NIL | 279.54 | NIL | 259.44 | NIL | 291.56 | NIL | 258.9  | NIL | 283.26 |
| 5343 | ψSymB | τ-SMB21066          | CDS | 700162 | 702336 - | 30 | 30 | NIL | 252.37 | NIL | 255.83 | NIL | 282.85 | NIL | 277.12 | NIL | 277.12 |
| 5344 | ψSymB | τ-SMB21067          | CDS | 701131 | 703658 - | 30 | 30 | NIL | 253.41 | NIL | 267.81 | NIL | 300.72 | NIL | 273.86 | NIL | 262.38 |
| 5345 | ψSymB | τ-SMB21068          | CDS | 702645 | 705395 + | 30 | 30 | NIL | 250.53 | NIL | 325.8  | NIL | 345.28 | NIL | 315.15 | NIL | 322.04 |
| 5346 | ψSymB | τ-SMB21069          | CDS | 703729 | 707672 + | 30 | 30 | ON  | 279.67 | ON  | 344.16 | NIL | 332.94 | NIL | 329.55 | NIL | 351.89 |
| 5347 | ψSymB | εx0P2-SMB21070      | CDS | 705774 | 708736 + | 30 | 30 | NIL | 310.94 | ON  | 283.18 | NIL | 307.73 | NIL | 313.11 | NIL | 350.63 |
| 5348 | ψSymB | τ-SMB21071          | CDS | 708086 | 709035 + | 30 | 30 | NIL | 251.62 | NIL | 286.08 | NIL | 272.01 | NIL | 227.24 | NIL | 286.42 |
| 5349 | ψSymB | τ-SMB21072          | CDS | 708781 | 709030 - | 30 | 30 | NIL | 250.96 | NIL | 286.08 | NIL | 293.47 | NIL | 305.76 | NIL | 318.13 |
| 5350 | ψSymB | εx0F2-SMB21073      | CDS | 709463 | 710830 - | 30 | 30 | NIL | 264.46 | NIL | 248.45 | NIL | 248.45 | NIL | 262.98 | NIL | 295.9  |
| 5351 | ψSymB | τ-SMB21074          | CDS | 709463 | 711801 - | 30 | 30 | NIL | 276.23 | NIL | 258.55 | NIL | 293.47 | NIL | 265.96 | NIL | 255.83 |
| 5352 | ψSymB | τ-SMB21075          | CDS | 710902 | 713314 + | 31 | 31 | NIL | 259.92 | NIL | 253.96 | NIL | 278.87 | NIL | 288.79 | NIL | 275.01 |
| 5353 | ψSymB | τ-SMB21076          | CDS | 712082 | 714437 - | 30 | 30 | NIL | 269.65 | NIL | 263.93 | NIL | 269.8  | NIL | 253.7  | NIL | 283.28 |
| 5354 | ψSymB | τ-SMB21077          | CDS | 713304 | 714877 - | 30 | 30 | NIL | 257.4  | NIL | 261.14 | NIL | 295.08 | NIL | 273.27 | NIL | 294.1  |
| 5355 | ψSymB | τ-SMB21078          | CDS | 714876 | 716084 + | 30 | 30 | NIL | 259.32 | NIL | 254.53 | NIL | 283.29 | NIL | 273.27 | NIL | 280.36 |
| 5356 | ψSymB | τ-SMB21079          | CDS | 716513 | 717244 + | 30 | 30 | NIL | 318.82 | NIL | 296.11 | NIL | 308.93 | NIL | 294.96 | NIL | 302.92 |
| 5357 | ψSymB | τ-SMB21080          | CDS | 717545 | 718369 + | 30 | 30 | NIL | 253.6  | NIL | 299.11 | NIL | 370.94 | NIL | 320.79 | NIL | 315.51 |
| 5358 | ψSymB | marB-2-SMB21081     | CDS | 719653 | 722288 + | 30 | 30 | NIL | 229.11 | NIL | 288.45 | ON  | 330.49 | NIL | 352    | NIL | 333.96 |
| 5359 | ψSymB | marC-2-SMB21082     | CDS | 719885 | 722867 + | 30 | 2  | NIL | 278.27 | NIL | 348.96 | ON  | 375.39 | ON  | 375.39 | NIL | 302.49 |
| 5360 | ψSymB | τ-SMB21083          | CDS | 722424 | 723217 + | 32 | 9  | ON  | 305.77 | ON  | 318.77 | ON  | 419.89 | ON  | 353.88 | NIL | 335.19 |
| 5361 | ψSymB | τ-SMB21084          | CDS | 722864 | 724932 + | 43 | 8  | ON  | 346.72 | ON  | 318.77 | ON  | 479.89 | ON  | 404.56 | ON  | 374.83 |
| 5362 | ψSymB | τ-SMB21085          | CDS | 723280 | 725358   | 30 | 30 | NIL | 359.21 | ON  | 364.48 | ON  | 436.07 | ON  | 385.02 | ON  | 377.53 |
| 5363 | ψSymB | τ-SMB21086          | CDS | 725358 | 725979   | 30 | 30 | NIL | 307.25 | NIL | 313.29 | NIL | 271.83 | NIL | 287.67 | NIL | 314.56 |
| 5364 | ψSymB | tra1-2-SMB21087     | CDS | 725979 | 730598 + | 48 | 3  | ON  | 326.06 | ON  | 336.09 | ON  | 410.01 | ON  | 372.44 | NIL | 315.85 |
| 5365 | ψSymB | τ-SMB21088          | CDS | 730922 | 731137 - | 30 | 30 | NIL | 237.11 | NIL | 254.17 | NIL | 283.77 | NIL | 273.62 | NIL | 309.07 |
| 5366 | ψSymB | τ-SMB21089          | CDS | 731300 | 732370 + | 30 | 30 | ON  | 319.09 | ON  | 340.39 | NIL | 326.24 | NIL | 302.52 | NIL | 310.93 |
| 5367 | ψSymB | τ-SMB21090          | CDS | 732456 | 733592 + | 30 | 30 | ON  | 337.38 | ON  | 324.77 | ON  | 326.24 | ON  | 361.82 | NIL | 366.1  |
| 5368 | ψSymB | ψsM-SMB21091        | CDS | 733897 | 734907 + | 30 | 30 | ON  | 372.11 | ON  | 406.85 | NIL | 306.35 | ON  | 407.93 | NIL | 338.95 |
| 5369 | ψSymB | τ-SMB21092          | CDS | 734912 | 735388 + | 30 | 30 | ON  | 357.74 | ON  | 352.1  | NIL | 338.36 | ON  | 358.61 | NIL | 365.56 |
| 5370 | ψSymB | τ-SMB21093          | CDS | 735413 | 736315 - | 30 | 30 | ON  | 361.84 | ON  | 389.16 | NIL | 410.73 | ON  | 376.47 | NIL | 362.93 |
| 5371 | ψSymB | argH2-SMB21094      | CDS | 737973 | 737976 + | 30 | 30 | NIL | 356.43 | ON  | 378.19 | NIL | 322.82 | ON  | 342.5  | NIL | 303.32 |
| 5372 | ψSymB | τ-SMB21095          | CDS | 737973 | 738845 + | 30 | 30 | NIL | 289.19 | NIL | 317.42 | NIL | 300.05 | NIL | 309.13 | NIL | 314.8  |
| 5373 | ψSymB | τ-SMB21096          | CDS | 738842 | 739624 + | 30 | 30 | NIL | 266.97 | NIL | 296.33 | NIL | 340.23 | NIL | 328.7  | NIL | 323.86 |
| 5374 | ψSymB | τ-SMB21097          | CDS | 739674 | 740516 + | 30 | 30 | ON  | 327.15 | ON  | 312.38 | ON  | 337.4  | ON  | 356.93 | ON  | 320.8  |
| 5375 | ψSymB | τ-SMB21098          | CDS | 740599 | 741396 + | 30 | 30 | ON  | 366.12 | ON  | 398.78 | ON  | 403.49 | ON  | 428.12 | ON  | 381.47 |
| 5376 | ψSymB | τ-SMB21099          | CDS | 741567 | 741989 + | 30 | 30 | NIL | 298.84 | NIL | 317.41 | ON  | 383.41 | ON  | 359.77 | NIL | 377.97 |
| 5377 | ψSymB | τ-SMB21100          | CDS | 742000 | 742878 + | 30 | 30 | NIL | 357.88 | ON  | 338.8  | NIL | 357.06 | ON  | 381.44 | NIL | 327.26 |
| 5378 | ψSymB | τ-SMB21101          | CDS | 743136 | 743972 - | 30 | 30 | ON  | 419.69 | ON  | 347.99 | NIL | 369.27 | ON  | 406.76 | NIL | 351.67 |
| 5379 | ψSymB | τ-SMB21102          | CDS | 743972 | 744805 - | 30 | 30 | ON  | 477.94 | ON  | 406.94 | ON  | 400.33 | ON  | 454.15 | NIL | 382.68 |
| 5380 | ψSymB | τ-SMB21103          | CDS | 744023 | 746292 + | 30 | 30 | ON  | 343.34 | ON  | 326.71 | ON  | 434.96 | ON  | 401.02 | NIL | 360.81 |
| 5381 | ψSymB | τ-SMB21104          | CDS | 746299 | 747258 + | 30 | 30 | NIL | 298.72 | NIL | 283.3  | NIL | 253.2  | NIL | 271.38 | NIL | 283.32 |
| 5382 | ψSymB | τ-SMB21105          | CDS | 747258 | 748124 + | 30 | 30 | NIL | 312.31 | ON  | 339.13 | NIL | 260.69 | NIL | 379.16 | NIL | 298.4  |
| 5383 | ψSymB | τ-SMB21106          | CDS | 748131 | 749228 + | 30 | 30 | NIL | 346.37 | ON  | 330.62 | NIL | 380.38 | ON  | 379.16 | NIL | 367.73 |
| 5384 | ψSymB | marR-SMB21107       | CDS | 749230 | 750342 + | 30 | 30 | NIL | 315.94 | ON  | 336.05 | ON  | 449.82 | ON  | 392.87 | ON  | 393.3  |
| 5386 | ψSymB | τ-SMB21108          | CDS | 750355 | 750684 + | 30 | 30 | NIL | 292.5  | NIL | 287.39 | NIL | 347.93 | NIL | 287.21 | NIL | 331.62 |
| 5387 | ψSymB | τ-SMB21109          | CDS | 750677 | 751759 + | 30 | 30 | ON  | 328.27 | NIL | 300.03 | NIL | 361.31 | NIL | 295.53 | NIL | 308.69 |
| 5388 | ψSymB | τ-SMB21110          | CDS | 751761 | 752222 + | 30 | 30 | ON  | 352.51 | ON  | 337.14 | NIL | 344.66 | ON  | 372.08 | NIL | 368.75 |
| 5389 | ψSymB | τ-SMB21111          | CDS | 752219 | 752953 + | 30 | 30 | ON  | 549.78 | ON  | 502.92 | ON  | 506.56 | ON  | 436.04 | NIL | 420.15 |
| 5390 | ψSymB | hpaG-SMB21112       | CDS | 752976 | 753821 + | 30 | 30 | ON  | 587.66 | ON  | 487.29 | ON  | 451.38 | ON  | 431.62 | ON  | 404.74 |
| 5390 | ψSymB | τ-SMB21113          | CDS | 754020 | 755222 + | 30 | 30 | ON  | 503.84 | ON  | 375.79 | ON  | 409.59 | ON  | 351.9  | ON  | 379.92 |

|            |                   |     |        |          |    |    |     |         |     |        |     |        |     |        |     |        |
|------------|-------------------|-----|--------|----------|----|----|-----|---------|-----|--------|-----|--------|-----|--------|-----|--------|
| 5391 pSyMB | rTA-SMB21114      | CDS | 755267 | 756592 - | 30 | 30 | ON  | 337.92  | ON  | 345.57 | NIL | 360.32 | ON  | 375.62 | NIL | 346.94 |
| 5392 pSyMB | ?-SMB21115        | CDS | 756618 | 757106 - | 30 | 30 | NIL | 286.67  | NIL | 290.67 | NIL | 344.1  | NIL | 316.03 | NIL | 344.64 |
| 5393 pSyMB | ?-SMB21116        | CDS | 757320 | 758051 - | 30 | 30 | ON  | 341.94  | ON  | 356.29 | NIL | 366.82 | NIL | 324.27 | NIL | 317.64 |
| 5394 pSyMB | ?-SMB21117        | CDS | 758135 | 758593 - | 30 | 30 | ON  | 545.35  | ON  | 531.67 | ON  | 446.99 | ON  | 556.53 | ON  | 432.46 |
| 5395 pSyMB | ?-SMB21118        | CDS | 758647 | 758847 + | 30 | 30 | NIL | 243.87  | NIL | 240.7  | NIL | 266.03 | NIL | 266.69 | NIL | 280.49 |
| 5396 pSyMB | gnk1-SMB21119     | CDS | 758907 | 759380 + | 42 | 42 | NIL | 304.81  | ON  | 359.38 | NIL | 275.44 | NIL | 268.69 | NIL | 288.33 |
| 5397 pSyMB | ?-SMB21120        | CDS | 759568 | 759576 + | 30 | 30 | NIL | 251.94  | NIL | 253.93 | NIL | 249.1  | NIL | 259.3  | NIL | 268.75 |
| 5398 pSyMB | lwdH-SMB21121     | CDS | 759569 | 760732 + | 30 | 30 | ON  | 382.66  | NIL | 324.87 | NIL | 361.63 | ON  | 375.67 | NIL | 339.93 |
| 5399 pSyMB | mcdA-SMB21122     | CDS | 760760 | 762367 + | 30 | 30 | ON  | 327.93  | NIL | 302.13 | NIL | 304.23 | NIL | 327.54 | NIL | 337.54 |
| 5400 pSyMB | ?-SMB21123        | CDS | 762382 | 762765 + | 30 | 30 | ON  | 344.68  | NIL | 289.1  | NIL | 365.34 | ON  | 373.66 | ON  | 373.19 |
| 5401 pSyMB | mcrB-SMB21124     | CDS | 762882 | 764770 + | 30 | 30 | ON  | 378.41  | ON  | 343.7  | ON  | 439.96 | ON  | 390.23 | ON  | 390.23 |
| 5402 pSyMB | ?-SMB21125        | CDS | 764782 | 765636 + | 30 | 30 | ON  | 316.95  | ON  | 332.97 | NIL | 361.27 | NIL | 361.27 | NIL | 334.62 |
| 5403 pSyMB | hmgL-SMB21126     | CDS | 765433 | 766418 + | 30 | 30 | ON  | 352.85  | NIL | 310.01 | NIL | 375.25 | ON  | 357.53 | ON  | 411.28 |
| 5404 pSyMB | ?-SMB21127        | CDS | 766495 | 766866 + | 30 | 30 | ON  | 366.01  | ON  | 380.21 | NIL | 332.29 | ON  | 357.87 | NIL | 304.11 |
| 5405 pSyMB | ?-SMB21128        | CDS | 766687 | 767827 + | 30 | 30 | ON  | 336.72  | ON  | 336.91 | NIL | 332.92 | NIL | 330.72 | NIL | 323.91 |
| 5406 pSyMB | ?-SMB21129        | CDS | 767663 | 768891 - | 30 | 30 | ON  | 357.13  | ON  | 388.59 | NIL | 358.08 | ON  | 383.96 | NIL | 354.82 |
| 5407 pSyMB | ?-SMB21130        | CDS | 769044 | 770147 - | 30 | 30 | ON  | 410.09  | ON  | 482.54 | ON  | 423.85 | ON  | 420.45 | NIL | 389.12 |
| 5408 pSyMB | ?-SMB21131        | CDS | 770163 | 771044 - | 31 | 31 | ON  | 374.09  | ON  | 460.86 | ON  | 373.09 | ON  | 416.99 | NIL | 366.07 |
| 5409 pSyMB | ?-SMB21132        | CDS | 771894 | 771894 - | 30 | 30 | ON  | 381.73  | ON  | 505.96 | NIL | 326.11 | ON  | 357.12 | NIL | 348.8  |
| 5410 pSyMB | ?-SMB21133        | CDS | 771891 | 772916 - | 30 | 30 | ON  | 363.97  | ON  | 505.96 | NIL | 431.77 | ON  | 417.89 | NIL | 435.8  |
| 5411 pSyMB | ?-SMB21134        | CDS | 773181 | 774239 - | 30 | 30 | ON  | 336.34  | ON  | 407.14 | ON  | 448.56 | ON  | 417.89 | NIL | 435.8  |
| 5412 pSyMB | ?-SMB21135        | CDS | 774396 | 775238 + | 30 | 30 | NIL | 276.37  | NIL | 308.36 | NIL | 273.51 | NIL | 317.26 | NIL | 279.3  |
| 5413 pSyMB | ?-SMB21136        | CDS | 775278 | 775928 + | 30 | 30 | NIL | 307.64  | NIL | 300.69 | NIL | 295.17 | NIL | 287.93 | NIL | 319.96 |
| 5414 pSyMB | ?-SMB21137        | CDS | 775970 | 776629 + | 30 | 30 | NIL | 306.13  | NIL | 319.62 | NIL | 266.33 | NIL | 287.93 | NIL | 246.27 |
| 5415 pSyMB | ?-SMB21138        | CDS | 776643 | 777410 + | 30 | 30 | NIL | 340.12  | NIL | 320.97 | NIL | 373.11 | ON  | 356.53 | ON  | 387.18 |
| 5416 pSyMB | ?-SMB21139        | CDS | 777447 | 777830 + | 30 | 30 | NIL | 299.43  | NIL | 297.23 | NIL | 465.55 | ON  | 361.15 | ON  | 427.57 |
| 5417 pSyMB | ?-SMB21140        | CDS | 777827 | 778687 + | 30 | 30 | ON  | 373.51  | ON  | 357.09 | NIL | 348.69 | ON  | 345.49 | ON  | 436.14 |
| 5418 pSyMB | ?-SMB21216        | CDS | 778729 | 778911 - | 31 | 31 | ON  | 328.79  | NIL | 300.93 | ON  | 476.44 | ON  | 403.5  | ON  | 430.81 |
| 5419 pSyMB | ?-SMB21217        | CDS | 779808 | 780743 - | 30 | 30 | ON  | 393.04  | ON  | 373.08 | ON  | 414.55 | ON  | 399.01 | ON  | 413.8  |
| 5420 pSyMB | ?-SMB21218        | CDS | 781765 | 781765 - | 30 | 30 | ON  | 344.33  | ON  | 318.53 | NIL | 318.53 | ON  | 368.2  | NIL | 364.53 |
| 5421 pSyMB | ?-SMB21219        | CDS | 781768 | 782613 - | 30 | 30 | ON  | 339.22  | ON  | 342.63 | NIL | 291.34 | NIL | 335.61 | NIL | 293.49 |
| 5422 pSyMB | ?-SMB21220        | CDS | 782613 | 783539 - | 30 | 30 | ON  | 340.48  | ON  | 350.6  | ON  | 330.56 | ON  | 311.58 | NIL | 286.78 |
| 5423 pSyMB | ?-SMB21221        | CDS | 783537 | 784975 - | 30 | 30 | ON  | 362.93  | NIL | 287.85 | NIL | 328.79 | ON  | 341.81 | NIL | 309.62 |
| 5424 pSyMB | ?-SMB21222        | CDS | 785200 | 786429 + | 30 | 30 | ON  | 317.28  | ON  | 338.53 | ON  | 403.73 | ON  | 342.05 | NIL | 342.05 |
| 5425 pSyMB | nodP2-SMB21223    | CDS | 786637 | 787536 + | 30 | 0  | NIL | 310.66  | NIL | 391.61 | NIL | 334.76 | ON  | 360.75 | NIL | 339.41 |
| 5426 pSyMB | nodQ2-SMB21224    | CDS | 787536 | 789437 + | 31 | 2  | NIL | 323.96  | ON  | 458.87 | ON  | 433.42 | ON  | 486.75 | NIL | 355.46 |
| 5427 pSyMB | ?-SMB21225        | CDS | 789434 | 790273 + | 30 | 30 | ON  | 425.51  | ON  | 458.87 | ON  | 433.42 | ON  | 486.75 | NIL | 355.46 |
| 5428 pSyMB | ?-SMB21226        | CDS | 790320 | 791060 + | 30 | 30 | ON  | 316.41  | ON  | 330.33 | NIL | 360.48 | ON  | 364.42 | ON  | 376.85 |
| 5429 pSyMB | ?-SMB21227        | CDS | 791057 | 792049 + | 30 | 30 | ON  | 333.66  | ON  | 330.71 | NIL | 369.88 | ON  | 359.99 | NIL | 356.57 |
| 5430 pSyMB | ?-SMB21228        | CDS | 792055 | 792990 + | 30 | 30 | ON  | 421.51  | ON  | 387.27 | ON  | 429.74 | ON  | 419.25 | NIL | 368.96 |
| 5431 pSyMB | ?-SMB21229        | CDS | 793076 | 794239 - | 30 | 30 | NIL | 301.02  | NIL | 320.1  | NIL | 319.93 | NIL | 314.83 | NIL | 339.48 |
| 5432 pSyMB | ?-SMB21230        | CDS | 794503 | 795585 - | 30 | 30 | ON  | 328.2   | NIL | 314.53 | ON  | 381.13 | ON  | 343.34 | NIL | 356.71 |
| 5433 pSyMB | ?-SMB21231        | CDS | 795654 | 796808 - | 30 | 30 | NIL | 291.43  | NIL | 293.13 | NIL | 308.53 | NIL | 295.15 | NIL | 310.06 |
| 5434 pSyMB | ?-SMB21232        | CDS | 797065 | 799167 - | 30 | 30 | ON  | 346.99  | ON  | 320.29 | NIL | 364.97 | NIL | 333.89 | NIL | 331.13 |
| 5435 pSyMB | Trm1-b-5-SMB21233 | CDS | 799170 | 800000 - | 74 | 0  | ON  | 539.44  | ON  | 419.21 | ON  | 422.74 | ON  | 358.27 | NIL | 305.8  |
| 5436 pSyMB | Trm1-a-5-SMB21234 | CDS | 799977 | 800413 - | 61 | 0  | ON  | 1043.07 | ON  | 867.1  | ON  | 422.74 | ON  | 657.58 | NIL | 489.87 |
| 5437 pSyMB | ?-SMB21235        | CDS | 800870 | 801808 - | 30 | 30 | ON  | 370.47  | ON  | 377.33 | ON  | 392.63 | ON  | 364.7  | NIL | 343.19 |
| 5438 pSyMB | ?-SMB21236        | CDS | 802253 | 803104 + | 30 | 30 | ON  | 347.29  | ON  | 356.29 | NIL | 342.53 | ON  | 373.45 | NIL | 329.9  |
| 5439 pSyMB | ?-SMB21237        | CDS | 803187 | 804110 + | 30 | 30 | NIL | 273.31  | NIL | 288.19 | NIL | 320.35 | NIL | 310.76 | NIL | 305.05 |
| 5440 pSyMB | ?-SMB21238        | CDS | 804151 | 804381 + | 30 | 30 | NIL | 293.69  | NIL | 311.8  | NIL | 386.56 | ON  | 352.39 | NIL | 357.88 |
| 5441 pSyMB | ?-SMB21239        | CDS | 804362 | 805600 + | 30 | 30 | ON  | 370.26  | ON  | 402.21 | ON  | 454.63 | ON  | 441.21 | ON  | 389.38 |
| 5442 pSyMB | ?-SMB21240        | CDS | 805755 | 807743 - | 30 | 30 | ON  | 340.83  | ON  | 356.8  | NIL | 340.07 | ON  | 374.99 | NIL | 315.03 |
| 5443 pSyMB | ?-SMB21241        | CDS | 808057 | 809349 - | 30 | 30 | NIL | 245.06  | NIL | 313.82 | NIL | 319.04 | NIL | 301.36 | NIL | 317.55 |
| 5444 pSyMB | ?-SMB21242        | CDS | 809385 | 810509 - | 30 | 30 | ON  | 344.52  | ON  | 371.74 | NIL | 381.87 | NIL | 334.47 | NIL | 341.98 |
| 5445 pSyMB | ?-SMB21243        | CDS | 810685 | 811611 - | 30 | 30 | ON  | 312.81  | ON  | 340.68 | ON  | 383.97 | NIL | 366.32 | NIL | 349.22 |
| 5446 pSyMB | ?-SMB21244        | CDS | 811842 | 813131 - | 30 | 30 | NIL | 309.35  | ON  | 323.81 | NIL | 288.87 | NIL | 300.99 | NIL | 325.76 |
| 5447 pSyMB | exoF3-SMB21245    | CDS | 813621 | 814871 + | 30 | 30 | ON  | 337.97  | ON  | 383.45 | ON  | 382.63 | ON  | 421.27 | ON  | 409.15 |
| 5448 pSyMB | ?-SMB21246        | CDS | 815060 | 815626 + | 30 | 30 | NIL | 293.83  | NIL | 302.66 | NIL | 338.97 | NIL | 278.3  | NIL | 316.87 |
| 5449 pSyMB | ?-SMB21247        | CDS | 815667 | 816553 + | 30 | 30 | NIL | 272.44  | ON  | 338.88 | NIL | 384.48 | NIL | 315.89 | NIL | 340.87 |
| 5450 pSyMB | ?-SMB21248        | CDS | 816422 | 817612 + | 30 | 30 | NIL | 305.77  | ON  | 331.69 | NIL | 372.05 | ON  | 347.68 | NIL | 348.87 |
| 5451 pSyMB | ?-SMB21249        | CDS | 817644 | 818486 + | 30 | 30 | NIL | 300.97  | ON  | 329.05 | ON  | 389.68 | ON  | 340.86 | NIL | 386.81 |
| 5452 pSyMB | ?-SMB21250        | CDS | 818897 | 820180 + | 30 | 30 | NIL | 316.76  | ON  | 391.01 | NIL | 371.59 | ON  | 342.42 | NIL | 359.19 |
| 5453 pSyMB | ?-SMB21251        | CDS | 820286 | 822502 + | 32 | 20 | NIL | 305.22  | NIL | 298.36 | NIL | 297.42 | ON  | 332.24 | NIL | 347.13 |
| 5454 pSyMB | ?-SMB21252        | CDS | 822580 | 823677 + | 30 | 30 | NIL | 397.9   | ON  | 342.42 | ON  | 440.36 | ON  | 356.07 | NIL | 332.85 |
| 5455 pSyMB | ?-SMB21253        | CDS | 823674 | 824444 + | 31 | 31 | NIL | 311.02  | NIL | 320.25 | NIL | 327.26 | NIL | 314.7  | NIL | 288.48 |
| 5456 pSyMB | ?-SMB21254        | CDS | 824431 | 825261 + | 30 | 30 | ON  | 402.22  | ON  | 507.32 | ON  | 394.29 | ON  | 457.21 | NIL | 350.6  |
| 5457 pSyMB | ?-SMB21255        | CDS | 825490 | 826892 + | 30 | 30 | ON  | 325.96  | ON  | 321.66 | ON  | 388.8  | NIL | 316.38 | NIL | 324.55 |
| 5458 pSyMB | ?-SMB21256        | CDS | 826882 | 828115 - | 30 | 30 | ON  | 501.38  | ON  | 411.1  | NIL | 341.67 | NIL | 355.61 | NIL | 351.82 |
| 5459 pSyMB | ?-SMB21257        | CDS | 828467 | 829486 + | 32 | 32 | ON  | 375.04  | NIL | 291.04 | NIL | 342.88 | NIL | 341.96 | NIL | 371.5  |
| 5460 pSyMB | ?-SMB21258        | CDS | 829453 | 829815 + | 30 | 30 | ON  | 423.22  | ON  | 392.54 | ON  | 393.78 | ON  | 362.7  | NIL | 403.92 |
| 5461 pSyMB | ?-SMB21259        | CDS | 829812 | 830792 + | 30 | 30 | ON  | 534.45  | ON  | 512.46 | NIL | 380.38 | ON  | 485.93 | NIL | 386.91 |
| 5462 pSyMB | ?-SMB21260        | CDS | 831102 | 832994 + | 30 | 30 | ON  | 393.81  | ON  | 437.23 | NIL | 361.92 | ON  | 408.75 | NIL | 381.95 |

|      |       |                |     |          |          |    |    |     |        |     |        |     |        |     |        |     |        |
|------|-------|----------------|-----|----------|----------|----|----|-----|--------|-----|--------|-----|--------|-----|--------|-----|--------|
| 5463 | ψSymB | ?_SMB21261     | CDS | 832991   | 834892 + | 30 | 30 | ON  | 361.11 | ON  | 338.77 | ON  | 488.31 | ON  | 413.02 | ON  | 386.17 |
| 5464 | ψSymB | ?_SMB21262     | CDS | 834894   | 835892 + | 30 | 30 | ON  | 384.98 | ON  | 458.01 | NIL | 329.43 | NIL | 386.3  | NIL | 316.15 |
| 5465 | ψSymB | ?_SMB21263     | CDS | 835973   | 837064 + | 30 | 30 | ON  | 339.8  | ON  | 421.07 | NIL | 316.18 | NIL | 331.41 | NIL | 327.41 |
| 5466 | ψSymB | redA_SMB21264  | CDS | 837144   | 838358 + | 30 | 30 | ON  | 401.11 | ON  | 332.52 | NIL | 301.61 | NIL | 331.92 | NIL | 320.67 |
| 5467 | ψSymB | redB_SMB21265  | CDS | 838365   | 839612 + | 30 | 30 | ON  | 368.61 | ON  | 411.3  | NIL | 332.67 | NIL | 370.85 | NIL | 383.56 |
| 5468 | ψSymB | ?_SMB21266     | CDS | 839609   | 840796 + | 30 | 30 | ON  | 380.67 | ON  | 350.48 | NIL | 346.38 | ON  | 348.86 | ON  | 390.09 |
| 5469 | ψSymB | ?_SMB21267     | CDS | 840855   | 841532 + | 30 | 30 | NIL | 282.35 | NIL | 259.12 | NIL | 326.43 | NIL | 282.8  | NIL | 308    |
| 5470 | ψSymB | ?_SMB21268     | CDS | 842397 + | 841684   | 30 | 30 | NIL | 340.91 | ON  | 335.34 | NIL | 313.13 | NIL | 321.72 | NIL | 299.13 |
| 5471 | ψSymB | ?_SMB21269     | CDS | 842345   | 844936 + | 32 | 32 | ON  | 342.11 | ON  | 335.34 | NIL | 335.94 | ON  | 359.52 | NIL | 333.01 |
| 5472 | ψSymB | ?_SMB21270     | CDS | 844532   | 844996 + | 30 | 30 | ON  | 341.17 | ON  | 337.77 | NIL | 332.78 | ON  | 349.42 | NIL | 328.21 |
| 5473 | ψSymB | ?_SMB21271     | CDS | 845080   | 845829 + | 30 | 30 | ON  | 331.11 | ON  | 329.35 | NIL | 332.92 | ON  | 340.28 | NIL | 362.46 |
| 5474 | ψSymB | ?_SMB21272     | CDS | 845977   | 847047 + | 30 | 30 | ON  | 347.4  | ON  | 339.35 | ON  | 424    | ON  | 408.74 | ON  | 384.29 |
| 5475 | ψSymB | potD_SMB21273  | CDS | 847044   | 848066 + | 30 | 30 | NIL | 330.7  | ON  | 403.86 | NIL | 373.8  | ON  | 470.91 | NIL | 352.83 |
| 5476 | ψSymB | potB_SMB21274  | CDS | 848083   | 848982 + | 30 | 30 | NIL | 296.13 | ON  | 355.25 | NIL | 269.69 | NIL | 287.69 | NIL | 319.25 |
| 5477 | ψSymB | potC_SMB21275  | CDS | 848979   | 849758 + | 30 | 30 | NIL | 307.35 | ON  | 348.41 | NIL | 261.78 | NIL | 288.63 | NIL | 308.18 |
| 5478 | ψSymB | potA_SMB21276  | CDS | 849751   | 850779 + | 30 | 30 | NIL | 371.73 | ON  | 392.66 | NIL | 372.85 | ON  | 360.26 | NIL | 370.81 |
| 5479 | ψSymB | ?_SMB21277     | CDS | 850786   | 851709 + | 30 | 30 | ON  | 428.89 | ON  | 375.81 | ON  | 394.05 | ON  | 421.24 | ON  | 455.88 |
| 5480 | ψSymB | rdcC2_SMB21278 | CDS | 851706   | 853487 + | 30 | 30 | ON  | 351.29 | ON  | 331.42 | ON  | 380.9  | ON  | 363.6  | NIL | 455.88 |
| 5481 | ψSymB | ?_SMB21279     | CDS | 853494   | 854623 + | 30 | 30 | ON  | 391.1  | ON  | 366.59 | NIL | 371.66 | ON  | 354.81 | ON  | 383.01 |
| 5482 | ψSymB | ?_SMB21280     | CDS | 854815   | 855525 + | 30 | 30 | ON  | 400.45 | ON  | 376.2  | ON  | 380.21 | ON  | 404.89 | NIL | 331.61 |
| 5483 | ψSymB | ?_SMB21281     | CDS | 855725   | 857098 + | 30 | 30 | ON  | 322.62 | NIL | 297.89 | ON  | 400.06 | ON  | 374.16 | NIL | 325.38 |
| 5484 | ψSymB | ?_SMB21282     | CDS | 857326   | 857850 + | 30 | 30 | NIL | 298.94 | NIL | 306.13 | NIL | 285.23 | NIL | 286.7  | NIL | 292.43 |
| 5485 | ψSymB | ?_SMB21283     | CDS | 857872   | 858894 - | 30 | 30 | NIL | 316.51 | NIL | 307.6  | NIL | 319.96 | NIL | 322    | NIL | 341.13 |
| 5486 | ψSymB | ?_SMB21284     | CDS | 858904   | 860319 - | 30 | 30 | ON  | 467.74 | ON  | 471.91 | NIL | 329.98 | NIL | 386.59 | ON  | 364.55 |
| 5487 | ψSymB | ?_SMB21285     | CDS | 860487   | 860858 + | 30 | 30 | ON  | 362.56 | ON  | 336.98 | NIL | 320.37 | NIL | 382.93 | ON  | 382.57 |
| 5488 | ψSymB | xdhA1_SMB21286 | CDS | 860864   | 862345 + | 31 | 30 | ON  | 366.44 | NIL | 369.24 | NIL | 382.68 | ON  | 387.68 | ON  | 348.5  |
| 5489 | ψSymB | xdhB1_SMB21287 | CDS | 862359   | 864692 + | 30 | 30 | ON  | 401.14 | ON  | 364.79 | ON  | 392.29 | ON  | 391.94 | ON  | 381.05 |
| 5490 | ψSymB | xdhC_SMB21288  | CDS | 864719   | 865585 + | 31 | 31 | ON  | 344.24 | NIL | 303.37 | ON  | 392.37 | ON  | 371.87 | NIL | 371.87 |
| 5491 | ψSymB | ?_SMB21289     | CDS | 865575   | 866078 - | 30 | 30 | NIL | 259.74 | NIL | 271.91 | NIL | 286.28 | NIL | 274.73 | NIL | 283.47 |
| 5492 | ψSymB | ?_SMB21290     | CDS | 866068   | 867048 + | 30 | 30 | ON  | 344.26 | ON  | 325.52 | ON  | 410.65 | ON  | 383.26 | NIL | 349.49 |
| 5493 | ψSymB | ?_SMB21291     | CDS | 867060   | 868007 - | 30 | 30 | ON  | 400.81 | ON  | 423.81 | ON  | 400.01 | ON  | 440.2  | NIL | 374.89 |
| 5494 | ψSymB | ?_SMB21292     | CDS | 868157   | 869396 + | 30 | 30 | ON  | 387.5  | ON  | 376.4  | NIL | 368.62 | ON  | 342.5  | NIL | 342.14 |
| 5495 | ψSymB | guaD1_SMB21293 | CDS | 869392   | 870735 + | 30 | 30 | ON  | 313.91 | NIL | 308.99 | NIL | 335.27 | NIL | 332.49 | NIL | 316.17 |
| 5496 | ψSymB | ?_SMB21294     | CDS | 870949   | 871455 - | 30 | 30 | ON  | 312.44 | ON  | 340.97 | ON  | 280.86 | NIL | 353.68 | NIL | 386.96 |
| 5497 | ψSymB | ?_SMB21295     | CDS | 871579   | 872163 - | 30 | 30 | NIL | 304.77 | NIL | 291.17 | NIL | 380.77 | NIL | 295.07 | NIL | 305.45 |
| 5498 | ψSymB | ?_SMB21296     | CDS | 872434   | 872739 + | 30 | 30 | ON  | 364.37 | ON  | 369.97 | NIL | 302.29 | NIL | 309.11 | NIL | 331.02 |
| 5499 | ψSymB | pbpC_SMB21297  | CDS | 872777   | 874927 + | 30 | 30 | ON  | 376.5  | ON  | 402.54 | NIL | 360.64 | NIL | 338.34 | NIL | 365.54 |
| 5500 | ψSymB | ?_SMB21298     | CDS | 874927   | 880374 - | 30 | 30 | ON  | 329.7  | ON  | 392.44 | NIL | 363.53 | ON  | 380.84 | ON  | 384.46 |
| 5501 | ψSymB | decR_SMB21299  | CDS | 880615   | 881406 + | 30 | 30 | ON  | 351.98 | ON  | 330.21 | NIL | 367.44 | ON  | 379.29 | NIL | 329.95 |
| 5502 | ψSymB | decC_SMB21300  | CDS | 881501   | 882505 + | 30 | 30 | ON  | 378.51 | NIL | 315.78 | NIL | 388.83 | ON  | 414.98 | NIL | 361.87 |
| 5503 | ψSymB | ?_SMB21301     | CDS | 882510   | 884894 + | 30 | 30 | ON  | 365.83 | NIL | 301.74 | NIL | 380.59 | ON  | 395.56 | NIL | 399.18 |
| 5504 | ψSymB | ?_SMB21302     | CDS | 885019   | 885874 + | 30 | 30 | ON  | 341.01 | NIL | 310.03 | NIL | 234.19 | NIL | 314.47 | NIL | 272.26 |
| 5505 | ψSymB | ?_SMB21303     | CDS | 885495   | 885923 + | 30 | 30 | ON  | 403.3  | ON  | 450.62 | NIL | 287.68 | ON  | 377.85 | NIL | 329.03 |
| 5506 | ψSymB | ?_SMB21304     | CDS | 885957   | 886751 + | 30 | 30 | ON  | 440.25 | ON  | 359.38 | ON  | 345.66 | ON  | 359.38 | NIL | 395.48 |
| 5507 | ψSymB | meiA2_SMB21143 | CDS | 888947   | 888368 - | 30 | 30 | ON  | 353.64 | ON  | 359.11 | ON  | 378.7  | ON  | 370.47 | NIL | 353.65 |
| 5508 | ψSymB | ?_SMB21144     | CDS | 888559   | 889476 + | 30 | 30 | ON  | 380.17 | ON  | 374.4  | ON  | 453.27 | ON  | 531.89 | ON  | 421.43 |
| 5509 | ψSymB | ?_SMB21145     | CDS | 889554   | 890753 + | 30 | 30 | ON  | 362.73 | ON  | 378.51 | ON  | 336.1  | ON  | 335.01 | NIL | 344.44 |
| 5510 | ψSymB | ?_SMB21146     | CDS | 890750   | 891688 + | 30 | 30 | ON  | 341.35 | ON  | 350.95 | ON  | 410.88 | NIL | 408.16 | ON  | 391.85 |
| 5511 | ψSymB | ?_SMB21147     | CDS | 891688   | 892425 + | 30 | 30 | ON  | 340.78 | ON  | 337.05 | NIL | 291.74 | NIL | 297.64 | NIL | 329.66 |
| 5512 | ψSymB | ?_SMB21148     | CDS | 892425   | 893774 + | 30 | 30 | ON  | 313    | ON  | 335.38 | NIL | 294.66 | NIL | 336.29 | NIL | 274.72 |
| 5513 | ψSymB | ?_SMB21149     | CDS | 893787   | 894671 + | 30 | 30 | ON  | 322.99 | NIL | 317.43 | NIL | 229.66 | NIL | 322.99 | NIL | 328.16 |
| 5514 | ψSymB | ?_SMB21150     | CDS | 894668   | 895525 + | 30 | 30 | ON  | 311.78 | ON  | 329.49 | NIL | 286.36 | NIL | 316.6  | NIL | 280.19 |
| 5515 | ψSymB | ?_SMB21151     | CDS | 895555   | 896784 + | 30 | 30 | NIL | 302.18 | ON  | 353.88 | NIL | 319.83 | ON  | 364.15 | NIL | 267.11 |
| 5516 | ψSymB | ?_SMB21152     | CDS | 896873   | 898004 + | 30 | 30 | NIL | 285.71 | NIL | 307.4  | NIL | 343.08 | NIL | 354.39 | NIL | 298.21 |
| 5517 | ψSymB | ?_SMB21153     | CDS | 898009   | 898509 + | 30 | 30 | NIL | 262.49 | NIL | 269.57 | NIL | 364.57 | NIL | 304.58 | NIL | 298.21 |
| 5518 | ψSymB | ?_SMB21154     | CDS | 898660   | 899043 + | 30 | 30 | NIL | 258.16 | NIL | 276.06 | NIL | 262.94 | NIL | 276.12 | NIL | 284.46 |
| 5519 | ψSymB | ?_SMB21155     | CDS | 899124   | 900617 - | 30 | 30 | NIL | 315.07 | NIL | 304.17 | ON  | 440.36 | ON  | 396.34 | NIL | 424.67 |
| 5520 | ψSymB | ?_SMB21156     | CDS | 900619   | 901185 - | 30 | 30 | ON  | 345.6  | ON  | 344.66 | ON  | 377.96 | ON  | 360.74 | NIL | 336.14 |
| 5521 | ψSymB | ?_SMB21157     | CDS | 901228   | 901617 + | 30 | 30 | NIL | 258.47 | NIL | 291.14 | NIL | 248.04 | NIL | 274.7  | NIL | 303.41 |
| 5522 | ψSymB | ?_SMB21158     | CDS | 901638   | 902501 + | 30 | 30 | NIL | 276.8  | NIL | 316.2  | NIL | 303.03 | NIL | 316.24 | NIL | 352.27 |
| 5523 | ψSymB | ?_SMB21159     | CDS | 902521   | 903297 + | 30 | 30 | NIL | 314.22 | NIL | 319.5  | NIL | 306.75 | NIL | 299.71 | NIL | 352.17 |
| 5524 | ψSymB | hexA_SMB21160  | CDS | 903222   | 905241 + | 30 | 30 | ON  | 348    | ON  | 366.2  | NIL | 362.19 | ON  | 338.18 | NIL | 308.46 |
| 5525 | ψSymB | ?_SMB21161     | CDS | 905250   | 906683 + | 30 | 30 | ON  | 369.34 | ON  | 360.86 | NIL | 362.19 | ON  | 341.84 | NIL | 330.87 |
| 5526 | ψSymB | huu_SMB21163   | CDS | 906757   | 907971 + | 30 | 30 | NIL | 314.85 | ON  | 326.84 | NIL | 294.87 | NIL | 303.47 | NIL | 307.72 |
| 5527 | ψSymB | huu_SMB21164   | CDS | 908169   | 909842 - | 30 | 30 | NIL | 364.66 | ON  | 372.49 | NIL | 361.74 | ON  | 374.11 | NIL | 376.37 |
| 5528 | ψSymB | huuG_SMB21165  | CDS | 909845   | 910640 - | 30 | 30 | ON  | 332.89 | ON  | 324.65 | NIL | 314.27 | NIL | 328.37 | NIL | 323.97 |
| 5529 | ψSymB | huuH_SMB21166  | CDS | 910662   | 912197 - | 31 | 31 | ON  | 355.27 | ON  | 327.23 | NIL | 332.24 | NIL | 308.67 | NIL | 347.64 |
| 5530 | ψSymB | ?_SMB21167     | CDS | 912194   | 913609 - | 31 | 30 | NIL | 353.83 | ON  | 390.17 | NIL | 317.6  | NIL | 325.47 | NIL | 325.69 |
| 5531 | ψSymB | ?_SMB21168     | CDS | 913644   | 915005 - | 41 | 9  | NIL | 303.13 | ON  | 365.41 | ON  | 385.09 | ON  | 390.33 | NIL | 360.95 |
| 5532 | ψSymB | ?_SMB21169     | CDS | 916366   | 916822 + | 30 | 30 | NIL | 348.63 | ON  | 356.57 | NIL | 327.32 | NIL | 332.87 | NIL | 357.93 |
| 5533 | ψSymB | ?_SMB21170     | CDS | 916402   | 916847   | 30 | 30 | NIL | 285.39 | NIL | 302.8  | NIL | 262.49 | NIL | 314.38 | NIL | 308.81 |
| 5534 | ψSymB | ?_SMB21170     | CDS | 916847   | 917434 - | 30 | 30 | ON  | 378.16 | ON  | 338.11 | ON  | 392.74 | ON  | 378.1  | ON  | 409.99 |

|      |       |                 |     |        |           |    |    |     |     |        |     |        |     |        |     |        |     |        |
|------|-------|-----------------|-----|--------|-----------|----|----|-----|-----|--------|-----|--------|-----|--------|-----|--------|-----|--------|
| 5535 | psymb | phm:SMb21171    | CDS | 917431 | 918570 -  | 30 | 30 | ON  | NIL | 376.01 | ON  | 378.25 | NIL | 359.74 | ON  | 334.42 | NIL | 335.95 |
| 5536 | psymb | ?_SMb21172      | CDS | 918536 | 918945 -  | 30 | 30 | NIL | NIL | 319.98 | NIL | 287.86 | NIL | 316.41 | NIL | 310.93 | NIL | 307.57 |
| 5537 | psymb | ?_SMb21173      | CDS | 919425 | 919616 +  | 31 | 31 | NIL | NIL | 184.11 | NIL | 213.3  | NIL | 180.72 | NIL | 186.3  | NIL | 244.31 |
| 5538 | psymb | phoT:SMb21174   | CDS | 919613 | 921130 -  | 30 | 30 | ON  | NIL | 323.39 | NIL | 268.51 | NIL | 331.94 | NIL | 293.64 | NIL | 297.75 |
| 5539 | psymb | phoE:SMb21175   | CDS | 921140 | 922102 -  | 30 | 30 | NIL | NIL | 298.1  | NIL | 335.12 | NIL | 293.4  | NIL | 292.23 | NIL | 304.45 |
| 5540 | psymb | phoD:SMb21176   | CDS | 922274 | 923179 -  | 30 | 30 | NIL | NIL | 309.33 | NIL | 303.26 | NIL | 327.01 | NIL | 325.63 | NIL | 337.74 |
| 5541 | psymb | phoC:SMb21177   | CDS | 923271 | 924110 -  | 30 | 30 | NIL | NIL | 305.31 | NIL | 289.1  | NIL | 311.26 | NIL | 315.63 | NIL | 330.72 |
| 5542 | psymb | ?_SMb21178      | CDS | 923277 | 925530 -  | 30 | 30 | ON  | ON  | 385.71 | ON  | 388.3  | ON  | 375.96 | ON  | 359.81 | NIL | 376.89 |
| 5543 | psymb | ?_SMb21179      | CDS | 925633 | 926808 -  | 30 | 30 | NIL | NIL | 407.42 | ON  | 333.56 | NIL | 367.54 | ON  | 373    | NIL | 343.4  |
| 5544 | psymb | ?_SMb21180      | CDS | 926839 | 927792 -  | 30 | 30 | NIL | NIL | 272.3  | NIL | 337.33 | ON  | 314.57 | NIL | 314.57 | ON  | 270.3  |
| 5545 | psymb | ?_SMb21181      | CDS | 927980 | 929167 +  | 30 | 30 | ON  | ON  | 465.21 | ON  | 477.33 | ON  | 475.53 | ON  | 554.77 | ON  | 388.57 |
| 5546 | psymb | ?_SMb21182      | CDS | 929179 | 930363 +  | 30 | 30 | ON  | ON  | 427.05 | ON  | 411.21 | NIL | 355.67 | ON  | 385.91 | ON  | 360.28 |
| 5547 | psymb | hnpG:SMb21183   | CDS | 930553 | 932442 -  | 30 | 30 | ON  | ON  | 460.63 | ON  | 333.94 | ON  | 377.99 | ON  | 388.68 | ON  | 387.58 |
| 5548 | psymb | ackA2:SMb21184  | CDS | 932547 | 933725 +  | 30 | 30 | NIL | NIL | 306.95 | NIL | 313.27 | NIL | 340.47 | NIL | 321.4  | NIL | 307.9  |
| 5549 | psymb | gndD:SMb21185   | CDS | 933762 | 935237 +  | 30 | 30 | ON  | NIL | 357.55 | ON  | 358.82 | ON  | 352.86 | ON  | 422.24 | ON  | 375.52 |
| 5550 | psymb | gndT:SMb21186   | CDS | 935353 | 936621 -  | 30 | 30 | ON  | ON  | 348.03 | ON  | 354.57 | NIL | 370.09 | ON  | 410.13 | NIL | 339.37 |
| 5551 | psymb | ?_SMb21187      | CDS | 936834 | 937664 +  | 30 | 30 | ON  | ON  | 398.13 | ON  | 364.55 | ON  | 416.11 | ON  | 460.56 | NIL | 362.76 |
| 5552 | psymb | ?_SMb21188      | CDS | 938008 | 939141 +  | 30 | 30 | NIL | NIL | 340.97 | ON  | 363.37 | NIL | 315.83 | ON  | 386.25 | NIL | 326.57 |
| 5553 | psymb | ?_SMb21189      | CDS | 939159 | 940262 +  | 30 | 30 | NIL | NIL | 277.13 | NIL | 316.6  | NIL | 326.73 | NIL | 297.57 | NIL | 325.32 |
| 5554 | psymb | ?_SMb21190      | CDS | 940264 | 941301 +  | 30 | 30 | NIL | NIL | 333.03 | ON  | 403.71 | ON  | 503.05 | ON  | 406.08 | NIL | 323.87 |
| 5555 | psymb | mbaA2:SMb21191  | CDS | 941311 | 943104 +  | 30 | 30 | NIL | NIL | 305.83 | NIL | 309.91 | NIL | 321.91 | ON  | 322.45 | NIL | 322.45 |
| 5556 | psymb | cbba2:SMb21192  | CDS | 943310 | 944373 -  | 30 | 30 | NIL | NIL | 583.2  | ON  | 755.88 | ON  | 504.27 | ON  | 537.26 | ON  | 689.82 |
| 5557 | psymb | ?_SMb21193      | CDS | 944373 | 944732 +  | 30 | 30 | NIL | NIL | 222.8  | NIL | 309.91 | NIL | 238.8  | NIL | 248.34 | NIL | 268.13 |
| 5558 | psymb | ?_SMb21195      | CDS | 944748 | 945030 +  | 30 | 30 | ON  | NIL | 246.05 | ON  | 248.48 | NIL | 242.27 | ON  | 242.27 | NIL | 282.91 |
| 5559 | psymb | oppA:SMb21196   | CDS | 945018 | 946016 +  | 30 | 30 | ON  | ON  | 831.44 | ON  | 638.76 | ON  | 405.96 | ON  | 648.67 | NIL | 377.54 |
| 5560 | psymb | oppB:SMb21197   | CDS | 946668 | 947591 +  | 30 | 30 | ON  | ON  | 442.53 | NIL | 298.42 | NIL | 311.95 | NIL | 321.39 | NIL | 290.43 |
| 5561 | psymb | oppC:SMb21198   | CDS | 947584 | 948714 +  | 30 | 30 | ON  | ON  | 492.23 | ON  | 355.59 | ON  | 385.67 | ON  | 339.89 | NIL | 342.93 |
| 5562 | psymb | oppD:SMb21199   | CDS | 948716 | 950317 +  | 30 | 30 | ON  | ON  | 398.57 | ON  | 347.84 | ON  | 377.04 | ON  | 364.57 | NIL | 353.14 |
| 5563 | psymb | ?_SMb21200      | CDS | 950520 | 951863 -  | 30 | 30 | ON  | ON  | 398.57 | ON  | 372    | ON  | 403.91 | ON  | 416.06 | NIL | 345.07 |
| 5564 | psymb | ?_SMb21201      | CDS | 951860 | 953680 -  | 30 | 30 | ON  | NIL | 315.97 | ON  | 327.04 | NIL | 350.33 | NIL | 327.31 | NIL | 334.26 |
| 5565 | psymb | ?_SMb21202      | CDS | 953953 | 954885 +  | 30 | 30 | NIL | NIL | 296.53 | NIL | 313.99 | NIL | 309.57 | NIL | 314.52 | NIL | 313.54 |
| 5566 | psymb | ?_SMb21203      | CDS | 954986 | 955588 +  | 30 | 30 | NIL | NIL | 311.91 | NIL | 314.07 | NIL | 312.35 | ON  | 309.95 | NIL | 307.56 |
| 5567 | psymb | ?_SMb21204      | CDS | 955649 | 955867 -  | 30 | 30 | NIL | NIL | 364.89 | ON  | 381.3  | NIL | 272.37 | NIL | 265.15 | NIL | 322.67 |
| 5568 | psymb | ?_SMb21205      | CDS | 955955 | 957067 -  | 30 | 30 | NIL | NIL | 303.14 | NIL | 290.06 | NIL | 289.66 | ON  | 342.55 | NIL | 315.46 |
| 5569 | psymb | ?_SMb21206      | CDS | 958223 | 958223 -  | 30 | 30 | ON  | ON  | 323.02 | ON  | 335.88 | NIL | 295.37 | ON  | 357.86 | NIL | 326.81 |
| 5570 | psymb | ?_SMb21207      | CDS | 959968 | 959968 -  | 30 | 30 | ON  | ON  | 378.74 | ON  | 362.44 | ON  | 312.66 | ON  | 373.73 | NIL | 324.11 |
| 5571 | psymb | ?_SMb21208      | CDS | 959972 | 960972 -  | 30 | 30 | ON  | ON  | 343.72 | NIL | 312.66 | NIL | 307.98 | ON  | 338.78 | NIL | 335.71 |
| 5572 | psymb | ?_SMb21209      | CDS | 960969 | 961646 -  | 30 | 30 | NIL | NIL | 325.64 | NIL | 292.23 | NIL | 316.7  | NIL | 326.01 | NIL | 342.86 |
| 5573 | psymb | ?_SMb21210      | CDS | 961787 | 963139 -  | 30 | 30 | NIL | NIL | 298.28 | NIL | 289.41 | NIL | 349.02 | NIL | 321.7  | NIL | 350.06 |
| 5574 | psymb | ?_SMb21211      | CDS | 963136 | 964807 -  | 30 | 30 | ON  | ON  | 326.42 | NIL | 396.38 | ON  | 429.77 | ON  | 515.41 | NIL | 418.21 |
| 5575 | psymb | ?_SMb21212      | CDS | 965894 | 966274 +  | 30 | 30 | ON  | ON  | 318.18 | NIL | 311.55 | NIL | 330.71 | NIL | 331.71 | NIL | 315.04 |
| 5576 | psymb | ?_SMb21213      | CDS | 966345 | 966524 +  | 31 | 31 | NIL | NIL | 282.18 | ON  | 272.58 | NIL | 261.4  | NIL | 260.92 | NIL | 285.16 |
| 5577 | psymb | pphA:SMb21213   | CDS | 966517 | 967176 +  | 30 | 30 | ON  | ON  | 374.06 | ON  | 342.03 | NIL | 317.67 | NIL | 331.48 | NIL | 354.55 |
| 5578 | psymb | orf24:SMb21214  | CDS | 967305 | 968027 +  | 30 | 30 | ON  | ON  | 481.92 | ON  | 393    | ON  | 379.53 | ON  | 379.94 | NIL | 373.94 |
| 5579 | psymb | orf23:SMb21215  | CDS | 968095 | 969702 -  | 30 | 30 | ON  | ON  | 321.63 | NIL | 311.11 | NIL | 340.58 | NIL | 326.01 | NIL | 329.31 |
| 5581 | psymb | expE8:SMb21307  | CDS | 970797 | 970797 -  | 30 | 30 | ON  | ON  | 355.53 | ON  | 372.04 | NIL | 373.28 | ON  | 393.16 | NIL | 314.44 |
| 5582 | psymb | expE7:SMb21308  | CDS | 970842 | 972164 -  | 30 | 31 | ON  | ON  | 335.08 | ON  | 379.08 | NIL | 328.1  | NIL | 307.53 | NIL | 305.62 |
| 5583 | psymb | expE5:SMb21309  | CDS | 972161 | 974377 -  | 30 | 30 | ON  | ON  | 336.09 | ON  | 329.09 | ON  | 410.18 | ON  | 399.7  | NIL | 353.99 |
| 5584 | psymb | expE4:SMb21310  | CDS | 974386 | 975090 -  | 30 | 30 | ON  | ON  | 349.21 | ON  | 329.47 | NIL | 392.62 | ON  | 361.14 | ON  | 385.57 |
| 5585 | psymb | expE3:SMb21311  | CDS | 975102 | 976364 -  | 30 | 30 | ON  | ON  | 322.17 | ON  | 349.09 | NIL | 392.62 | ON  | 359.84 | NIL | 378.56 |
| 5586 | psymb | expE2:SMb21312  | CDS | 976361 | 977206 -  | 30 | 30 | NIL | NIL | 283.98 | ON  | 329.43 | NIL | 293.47 | NIL | 303.11 | NIL | 268.2  |
| 5587 | psymb | expE1:SMb21314  | CDS | 977203 | 979452 -  | 30 | 30 | NIL | NIL | 300.31 | ON  | 331.98 | NIL | 331.79 | NIL | 294.05 | NIL | 335.87 |
| 5588 | psymb | expD1:SMb21315  | CDS | 979583 | 980242 -  | 30 | 30 | ON  | ON  | 350.04 | ON  | 454.87 | ON  | 443.9  | ON  | 389.02 | ON  | 419.53 |
| 5589 | psymb | expD2:SMb21316  | CDS | 980317 | 981938 -  | 31 | 31 | ON  | ON  | 347.17 | ON  | 341.44 | NIL | 313.51 | ON  | 352.35 | NIL | 347.27 |
| 5590 | psymb | expD3:SMb21317  | CDS | 981935 | 983704 -  | 30 | 30 | ON  | ON  | 315.94 | NIL | 316.83 | NIL | 335.09 | NIL | 331.37 | NIL | 329.42 |
| 5591 | psymb | expC:SMb21318   | CDS | 983901 | 985876 +  | 30 | 30 | ON  | ON  | 358.22 | ON  | 394.43 | NIL | 374.6  | ON  | 353.04 | ON  | 372.12 |
| 5592 | psymb | expC1:SMb21319  | CDS | 984623 | 985876 +  | 30 | 30 | ON  | ON  | 366.23 | ON  | 343.98 | NIL | 348.21 | ON  | 360.38 | NIL | 345.69 |
| 5593 | psymb | expA1:SMb21320  | CDS | 986060 | 987532 +  | 30 | 30 | ON  | ON  | 322.98 | ON  | 357.83 | NIL | 348.37 | ON  | 349.98 | NIL | 365.37 |
| 5594 | psymb | expA2:SMb21321  | CDS | 987519 | 990200 -  | 30 | 30 | ON  | ON  | 388.15 | ON  | 366.48 | NIL | 336.52 | ON  | 362.83 | NIL | 302.33 |
| 5595 | psymb | expA3:SMb21322  | CDS | 990235 | 991413 +  | 30 | 30 | NIL | NIL | 299.07 | NIL | 331.96 | NIL | 329.92 | NIL | 331.85 | NIL | 333.09 |
| 5596 | psymb | expA5:SMb21323  | CDS | 991456 | 992628 +  | 30 | 30 | ON  | ON  | 321.25 | ON  | 319.75 | NIL | 346.63 | NIL | 360.32 | NIL | 332.72 |
| 5597 | psymb | expA6:SMb21324  | CDS | 992615 | 993787 +  | 30 | 30 | ON  | ON  | 350.74 | ON  | 287.44 | NIL | 349.64 | NIL | 306.51 | NIL | 336.76 |
| 5598 | psymb | expA7:SMb21325  | CDS | 993810 | 994691 +  | 30 | 30 | NIL | NIL | 281.56 | NIL | 292.44 | NIL | 294.59 | NIL | 291.99 | NIL | 313.06 |
| 5599 | psymb | expA8:SMb21326  | CDS | 995259 | 996529 +  | 30 | 30 | NIL | NIL | 293.16 | NIL | 306.57 | NIL | 290.32 | NIL | 313.42 | NIL | 317.56 |
| 5600 | psymb | expA9:SMb21327  | CDS | 996526 | 997282 +  | 30 | 30 | ON  | ON  | 342.3  | ON  | 316.67 | ON  | 449.59 | ON  | 412.25 | NIL | 356.61 |
| 5601 | psymb | expA10:SMb21328 | CDS | 997274 | 998092 -  | 30 | 30 | ON  | ON  | 324.75 | NIL | 308.64 | NIL | 448.98 | ON  | 348.03 | NIL | 348.03 |
| 5603 | psymb | ?_SMb21329      | CDS | 998151 | 998321 -  | 30 | 30 | ON  | NIL | 334.02 | ON  | 344.09 | NIL | 272.06 | ON  | 313.92 | NIL | 313.92 |
| 5604 | psymb | ?_SMb21330      | CDS | 998495 | 998746 +  | 30 | 30 | NIL | NIL | 285.98 | NIL | 315.66 | ON  | 379.93 | ON  | 373.13 | NIL | 348.14 |
| 5605 | psymb | ?_SMb21331      | CDS | 998978 | 999298 -  | 30 | 30 | ON  | ON  | 318.5  | ON  | 350.02 | NIL | 354.1  | ON  | 382.49 | NIL | 415.27 |
| 5606 | psymb | ?_SMb21332      | CDS | 999572 | 1000069 + | 30 | 30 | NIL | NIL | 306.24 | NIL | 308.79 | NIL | 367.46 | ON  | 367.15 | NIL | 363.4  |

|      |       |              |     |         |         |   |    |    |     |        |     |        |     |        |     |        |     |        |     |
|------|-------|--------------|-----|---------|---------|---|----|----|-----|--------|-----|--------|-----|--------|-----|--------|-----|--------|-----|
| 5607 | psymb | 7. S.MB21333 | CDS | 1000124 | 1000483 | + | 30 | 30 | ON  | 313.49 | NIL | 312.26 | ON  | 456.77 | ON  | 375.12 | NIL | 371.02 | ON  |
| 5608 | psymb | 7. S.MB21334 | CDS | 1000632 | 1001393 | + | 30 | 30 | ON  | 343.95 | NIL | 323.26 | ON  | 430.88 | ON  | 403.3  | NIL | 336.02 | ON  |
| 5609 | psymb | 7. S.MB21335 | CDS | 1001488 | 1002567 | + | 30 | 30 | ON  | 327.02 | ON  | 331.51 | NIL | 347.17 | NIL | 321.48 | NIL | 337.54 | NIL |
| 5610 | psymb | 7. S.MB21336 | CDS | 1002815 | 1003759 | + | 30 | 30 | NIL | 285.54 | ON  | 326.94 | NIL | 315.33 | ON  | 299.84 | NIL | 369.34 | NIL |
| 5611 | psymb | 7. S.MB21337 | CDS | 1003866 | 1004548 | + | 30 | 30 | NIL | 297.94 | NIL | 344    | NIL | 372.87 | ON  | 362.53 | NIL | 365.03 | ON  |
| 5612 | psymb | 7. S.MB21338 | CDS | 1004552 | 1005457 | + | 30 | 30 | NIL | 314.82 | NIL | 302    | NIL | 369.76 | NIL | 326.37 | ON  | 379.47 | ON  |
| 5613 | psymb | 7. S.MB21339 | CDS | 1004549 | 1005791 | + | 31 | 31 | NIL | 257.32 | NIL | 276.25 | NIL | 314.24 | NIL | 342.79 | NIL | 322.79 | NIL |
| 5614 | psymb | 7. S.MB21340 | CDS | 1005764 | 1006681 | + | 31 | 31 | NIL | 319.37 | ON  | 332.86 | ON  | 370.77 | ON  | 352.08 | NIL | 318.62 | ON  |
| 5615 | psymb | 7. S.MB21341 | CDS | 1006861 | 1007709 | + | 30 | 30 | ON  | 356.5  | ON  | 334.31 | ON  | 412.81 | ON  | 382.29 | NIL | 359.6  | ON  |
| 5616 | psymb | 7. S.MB21342 | CDS | 1007763 | 1008761 | + | 30 | 30 | NIL | 283.79 | NIL | 319.13 | NIL | 374.79 | NIL | 323.18 | NIL | 323.62 | ON  |
| 5617 | psymb | 7. S.MB21343 | CDS | 1008768 | 1009772 | - | 30 | 30 | NIL | 292.55 | NIL | 325.97 | ON  | 361.28 | ON  | 350.7  | NIL | 297.09 | ON  |
| 5618 | psymb | 7. S.MB21344 | CDS | 1009774 | 1011267 | + | 30 | 30 | NIL | 270.65 | NIL | 276.95 | NIL | 351.54 | ON  | 325.46 | ON  | 325.46 | ON  |
| 5619 | psymb | 7. S.MB21345 | CDS | 1011367 | 1012350 | - | 30 | 30 | NIL | 284.18 | NIL | 284.18 | NIL | 361.54 | ON  | 301.97 | NIL | 322.48 | ON  |
| 5620 | psymb | 7. S.MB21346 | CDS | 1012574 | 1013626 | + | 30 | 30 | ON  | 351.37 | ON  | 354.95 | ON  | 406.49 | ON  | 352.75 | ON  | 362.75 | ON  |
| 5621 | psymb | 7. S.MB21347 | CDS | 1013699 | 1014037 | + | 30 | 30 | ON  | 430.46 | ON  | 484.45 | ON  | 398.47 | ON  | 459.7  | NIL | 359.7  | NIL |
| 5622 | psymb | 7. S.MB21348 | CDS | 1014047 | 1014811 | - | 30 | 30 | ON  | 362.63 | ON  | 345.21 | NIL | 328.16 | ON  | 328.16 | ON  | 375.14 | ON  |
| 5623 | psymb | 7. S.MB21349 | CDS | 1014808 | 1015656 | - | 30 | 30 | NIL | 310.54 | ON  | 345.52 | ON  | 356.15 | ON  | 358.57 | NIL | 345.84 | NIL |
| 5624 | psymb | 7. S.MB21350 | CDS | 1015789 | 1016538 | - | 30 | 30 | ON  | 354.66 | ON  | 394.18 | ON  | 340.85 | ON  | 343.77 | ON  | 340.46 | NIL |
| 5625 | psymb | 7. S.MB21351 | CDS | 1016547 | 1017830 | - | 30 | 30 | ON  | 311.07 | ON  | 332.71 | NIL | 309.92 | ON  | 357.11 | ON  | 299.18 | ON  |
| 5626 | psymb | 7. S.MB21352 | CDS | 1017835 | 1018353 | - | 30 | 30 | NIL | 315.93 | ON  | 441.19 | NIL | 315.83 | ON  | 315.83 | ON  | 333.6  | ON  |
| 5627 | psymb | 7. S.MB21353 | CDS | 1018487 | 1019464 | - | 30 | 30 | NIL | 283.25 | ON  | 442.99 | NIL | 442.99 | ON  | 431.44 | NIL | 431.44 | NIL |
| 5628 | psymb | 7. S.MB21354 | CDS | 1019465 | 1020096 | + | 30 | 30 | ON  | 323.6  | ON  | 388.5  | ON  | 392.13 | ON  | 423    | NIL | 352.91 | ON  |
| 5629 | psymb | 7. S.MB21355 | CDS | 1021043 | 1022082 | + | 30 | 30 | ON  | 334.38 | ON  | 396.12 | ON  | 341.38 | ON  | 363.37 | NIL | 362.02 | ON  |
| 5630 | psymb | 7. S.MB21356 | CDS | 1023169 | 1023169 | + | 30 | 30 | NIL |        |     |        |     |        |     |        |     |        |     |

[illegible]

|             |                 |     |         |           |    |    |     |        |     |        |     |        |     |        |     |        |
|-------------|-----------------|-----|---------|-----------|----|----|-----|--------|-----|--------|-----|--------|-----|--------|-----|--------|
| 5752. pSymB | 2. SMB20930     | CDS | 1153920 | 1154660 - | 30 | 30 | NIL | 277.56 | ON  | 333.62 | NIL | 304.35 | ON  | 348.36 | NIL | 315.7  |
| 5752. pSymB | 2. SMB20931     | CDS | 1154670 | 1156050 + | 30 | 30 | NIL | 321.95 | ON  | 384.81 | NIL | 356.48 | ON  | 440.04 | NIL | 323.5  |
| 5753. pSymB | exsH. SMB20932  | CDS | 1156120 | 1157517 - | 30 | 30 | ON  | 334.78 | ON  | 379.97 | NIL | 351.61 | NIL | 304.23 | NIL | 354.52 |
| 5754. pSymB | exsG. SMB20933  | CDS | 1157697 | 1160420 + | 30 | 30 | ON  | 303.59 | NIL | 330.59 | ON  | 396.03 | ON  | 342.68 | NIL | 323.18 |
| 5755. pSymB | exsF. SMB20934  | CDS | 1160417 | 1160953 + | 31 | 31 | NIL | 267.5  | NIL | 296.62 | NIL | 311.67 | NIL | 271.79 | NIL | 334.62 |
| 5757. pSymB | exsI. SMB20935  | CDS | 1160933 | 1161143 + | 30 | 30 | ON  | 826.01 | ON  | 579.91 | NIL | 302.64 | ON  | 404.01 | NIL | 343.55 |
| 5757. pSymB | 2. SMB20936     | CDS | 1161365 | 1161952 + | 30 | 30 | ON  | 332.96 | ON  | 350.14 | NIL | 320.25 | ON  | 352.99 | NIL | 316.85 |
| 5758. pSymB | exsE. SMB20937  | CDS | 1163811 | 1163811 + | 30 | 30 | ON  | 376.98 | ON  | 450.66 | ON  | 500.26 | ON  | 440.42 | ON  | 408.43 |
| 5759. pSymB | exsD. SMB20938  | CDS | 1163858 | 1164595 - | 30 | 30 | ON  | 365.92 | ON  | 351.37 | NIL | 369.4  | ON  | 392.25 | NIL | 352.98 |
| 5760. pSymB | exsC. SMB20939  | CDS | 1164592 | 1164951 - | 31 | 31 | ON  | 322.71 | NIL | 294.33 | NIL | 319.29 | NIL | 290.64 | NIL | 295.64 |
| 5761. pSymB | exsA. SMB20940  | CDS | 1164948 | 1165658 - | 30 | 30 | ON  | 339.77 | ON  | 350.89 | NIL | 329.49 | NIL | 291.07 | NIL | 313.36 |
| 5762. pSymB | exsA. SMB20941  | CDS | 1165803 | 1167617 - | 30 | 30 | ON  | 316.39 | NIL | 324.76 | NIL | 342.92 | NIL | 313.36 | ON  | 282    |
| 5763. pSymB | exsB. SMB20942  | CDS | 1168150 | 1169136 + | 30 | 30 | ON  | 454.66 | ON  | 389.27 | ON  | 442.99 | NIL | 488.45 | ON  | 424.16 |
| 5764. pSymB | exsZ. SMB20943  | CDS | 1169222 | 1170175 - | 30 | 30 | ON  | 332.19 | ON  | 393.5  | NIL | 335.17 | NIL | 337.95 | ON  | 351.44 |
| 5765. pSymB | exsQ. SMB20944  | CDS | 1170226 | 1171533 - | 30 | 30 | ON  | 354.8  | ON  | 346.5  | NIL | 362.01 | ON  | 375.68 | ON  | 380.2  |
| 5766. pSymB | exsQ. SMB20945  | CDS | 1171541 | 1172806 - | 30 | 30 | ON  | 417.16 | ON  | 437.33 | ON  | 432.01 | ON  | 439.72 | ON  | 454.36 |
| 5767. pSymB | exsT. SMB20946  | CDS | 1172859 | 1173839 - | 30 | 30 | ON  | 419.17 | ON  | 705.3  | ON  | 534.02 | ON  | 531.93 | ON  | 484.63 |
| 5768. pSymB | exsT. SMB20947  | CDS | 1174312 | 1174608 + | 30 | 30 | ON  | 313.13 | ON  | 377.72 | NIL | 308.83 | ON  | 359.01 | NIL | 350.93 |
| 5769. pSymB | exsU. SMB20948  | CDS | 1174743 | 1175711 + | 30 | 30 | NIL | 286.06 | NIL | 297.31 | NIL | 310.63 | NIL | 299.41 | NIL | 301.08 |
| 5770. pSymB | exsV. SMB20949  | CDS | 1175762 | 1176712 - | 30 | 30 | ON  | 328.04 | ON  | 324.99 | ON  | 336.69 | ON  | 343.32 | NIL | 354.53 |
| 5771. pSymB | exsW. SMB20950  | CDS | 1176826 | 1177785 - | 30 | 30 | ON  | 346.73 | ON  | 350.2  | NIL | 337.28 | NIL | 324.59 | NIL | 339.07 |
| 5772. pSymB | exsT. SMB20951  | CDS | 1177910 | 1179394 + | 30 | 30 | NIL | 321.05 | ON  | 357.41 | NIL | 290.72 | NIL | 322.75 | NIL | 342.87 |
| 5773. pSymB | 2. SMB21673     | CDS | 1179423 | 1179659 + | 30 | 30 | NIL | 303.14 | ON  | 350.51 | NIL | 299.51 | NIL | 257.77 | NIL | 359.8  |
| 5774. pSymB | exsI. SMB20951  | CDS | 1179773 | 1180348 + | 30 | 30 | NIL | 363.86 | ON  | 343.47 | ON  | 389.6  | ON  | 354.57 | NIL | 367.7  |
| 5775. pSymB | 2. SMB20952     | CDS | 1180368 | 1180625 + | 30 | 30 | NIL | 284.83 | NIL | 286.38 | NIL | 298.55 | NIL | 284.8  | NIL | 314.23 |
| 5776. pSymB | exsH. SMB20954  | CDS | 1180716 | 1181099 + | 30 | 30 | ON  | 331.91 | ON  | 389.59 | NIL | 299.69 | NIL | 327.97 | NIL | 298.4  |
| 5777. pSymB | exsK. SMB20955  | CDS | 1181238 | 1182356 + | 30 | 30 | ON  | 346    | ON  | 380.31 | NIL | 331.77 | ON  | 364.5  | NIL | 335.1  |
| 5778. pSymB | exsL. SMB20956  | CDS | 1182356 | 1183165 + | 30 | 30 | ON  | 388.83 | ON  | 426.7  | ON  | 388.22 | ON  | 380.12 | ON  | 424.33 |
| 5779. pSymB | exsL. SMB20956  | CDS | 1183261 | 1184472 + | 30 | 30 | ON  | 427.5  | ON  | 413.48 | NIL | 342.89 | ON  | 387.81 | ON  | 384.86 |
| 5780. pSymB | exsM. SMB20957  | CDS | 1185461 | 1185461 + | 30 | 30 | ON  | 362.65 | ON  | 410.06 | NIL | 365.94 | ON  | 359.84 | NIL | 366.34 |
| 5781. pSymB | exsM. SMB20958  | CDS | 1185461 | 1186390 + | 30 | 30 | ON  | 348.45 | ON  | 389.39 | NIL | 355.62 | ON  | 409.55 | NIL | 376.09 |
| 5782. pSymB | exsN. SMB20959  | CDS | 1186387 | 1187433 + | 30 | 30 | ON  | 347.36 | NIL | 347.92 | NIL | 356.45 | ON  | 359.29 | NIL | 426.36 |
| 5783. pSymB | exsN. SMB20960  | CDS | 1187438 | 1188343 + | 30 | 30 | ON  | 505.59 | ON  | 516.28 | ON  | 398.59 | ON  | 478.06 | ON  | 426.61 |
| 5784. pSymB | exsP. SMB20961  | CDS | 1188398 | 1190758 + | 30 | 30 | ON  | 363.09 | ON  | 412.71 | ON  | 378.48 | ON  | 386.73 | ON  | 394.85 |
| 5785. pSymB | thnD. SMB20962  | CDS | 1191117 | 1191917 - | 30 | 30 | ON  | 363.34 | ON  | 426.62 | ON  | 417.8  | ON  | 390.37 | ON  | 382.49 |
| 5786. pSymB | 2. SMB20963     | CDS | 1191952 | 1192257 + | 30 | 30 | NIL | 235.9  | NIL | 254.37 | NIL | 278.14 | NIL | 256.57 | NIL | 275.79 |
| 5787. pSymB | 2. SMB20964     | CDS | 1192362 | 1193021 + | 30 | 30 | ON  | 405.6  | ON  | 614.58 | ON  | 469.15 | ON  | 482.08 | NIL | 365.62 |
| 5788. pSymB | 2. SMB20965     | CDS | 1194139 | 1196186 - | 30 | 30 | ON  | 364.66 | ON  | 354.51 | ON  | 424.12 | ON  | 367.67 | NIL | 342.19 |
| 5789. pSymB | hsc22. SMB20966 | CDS | 1194246 | 1197410 - | 30 | 30 | NIL | 357.3  | ON  | 372.2  | NIL | 332.25 | ON  | 367.02 | ON  | 393.76 |
| 5790. pSymB | 2. SMB20967     | CDS | 1196376 | 1197418   | 30 | 30 | NIL | 310.6  | ON  | 326.06 | NIL | 307.06 | NIL | 404.83 | NIL | 321.92 |
| 5791. pSymB | 2. SMB20968     | CDS | 1197418 | 1199130 - | 30 | 30 | ON  | 417.45 | ON  | 392.35 | ON  | 402.14 | ON  | 404.59 | ON  | 376.15 |
| 5792. pSymB | 2. SMB20969     | CDS | 1199134 | 1199946 - | 31 | 31 | NIL | 295.66 | NIL | 313.13 | NIL | 300.52 | NIL | 289.97 | NIL | 312.91 |
| 5793. pSymB | 2. SMB20970     | CDS | 1199939 | 1200896 - | 30 | 30 | NIL | 306.42 | ON  | 294.9  | NIL | 246.63 | NIL | 275.04 | NIL | 309.29 |
| 5794. pSymB | 2. SMB20971     | CDS | 1200911 | 1202143 - | 31 | 31 | NIL | 346.64 | ON  | 332.36 | ON  | 424.35 | ON  | 420.93 | NIL | 367.68 |
| 5795. pSymB | 2. SMB20972     | CDS | 1202136 | 1203311 - | 30 | 30 | NIL | 295.66 | NIL | 309.77 | NIL | 360.67 | ON  | 373.47 | NIL | 366.84 |
| 5796. pSymB | 2. SMB20973     | CDS | 1203418 | 1206444 - | 30 | 30 | ON  | 337.99 | NIL | 316.31 | NIL | 320.65 | ON  | 396.93 | NIL | 337.38 |
| 5797. pSymB | 2. SMB20974     | CDS | 1206458 | 1207126 - | 30 | 30 | ON  | 369.8  | NIL | 311.03 | ON  | 412.34 | ON  | 392.85 | NIL | 338.03 |
| 5798. pSymB | 2. SMB20975     | CDS | 1207152 | 1208801 - | 30 | 30 | NIL | 345.12 | ON  | 380.87 | NIL | 304.04 | ON  | 353.99 | NIL | 337.59 |
| 5799. pSymB | 2. SMB20976     | CDS | 1208875 | 1209621 - | 30 | 30 | NIL | 303.73 | ON  | 284.91 | NIL | 325.79 | NIL | 303.1  | NIL | 312.53 |
| 5800. pSymB | 2. SMB20977     | CDS | 1209652 | 1210719 - | 30 | 30 | NIL | 371.36 | ON  | 406.16 | ON  | 404.41 | ON  | 329.82 | NIL | 329.82 |
| 5801. pSymB | 2. SMB20978     | CDS | 1210954 | 1211505 - | 30 | 30 | NIL | 326.92 | NIL | 251.13 | NIL | 273.47 | NIL | 236.32 | NIL | 274.93 |
| 5802. pSymB | 2. SMB20979     | CDS | 1211593 | 1212906 - | 31 | 31 | NIL | 356.92 | NIL | 323.39 | NIL | 333.84 | ON  | 333.84 | NIL | 321.79 |
| 5803. pSymB | 2. SMB20980     | CDS | 1212903 | 1213415 - | 30 | 30 | NIL | 287.38 | NIL | 307.32 | NIL | 334.63 | NIL | 320.99 | NIL | 301.32 |
| 5804. pSymB | 2. SMB20981     | CDS | 1213597 | 1214574 - | 30 | 30 | ON  | 329.13 | NIL | 321.16 | ON  | 449.51 | ON  | 375.96 | NIL | 334.33 |
| 5805. pSymB | 2. SMB20982     | CDS | 1214652 | 1214912 - | 30 | 30 | ON  | 330.62 | NIL | 289.01 | NIL | 386.79 | ON  | 313.75 | NIL | 331.99 |
| 5806. pSymB | 2. SMB20983     | CDS | 1214958 | 1215320   | 30 | 30 | NIL | 252.12 | NIL | 285.22 | NIL | 292.5  | NIL | 259.07 | NIL | 296.18 |
| 5807. pSymB | nriB. SMB20984  | CDS | 1215305 | 1217767 + | 30 | 30 | NIL | 306.91 | NIL | 285.01 | NIL | 388.51 | ON  | 373.95 | NIL | 346.4  |
| 5808. pSymB | nriD. SMB20985  | CDS | 1215305 | 1217771   | 30 | 30 | NIL | 226.11 | NIL | 255.25 | NIL | 257.21 | NIL | 270.32 | NIL | 285.59 |
| 5809. pSymB | narB. SMB20986  | CDS | 1217771 | 1220769 + | 30 | 30 | NIL | 309.9  | ON  | 332.18 | NIL | 359.4  | ON  | 358.9  | NIL | 351.1  |
| 5810. pSymB | 2. SMB20987     | CDS | 1220792 | 1221812   | 30 | 30 | NIL | 305.06 | ON  | 276.01 | ON  | 388.91 | ON  | 367.25 | NIL | 360.31 |
| 5811. pSymB | 2. SMB20988     | CDS | 1221899 | 1222444 + | 30 | 30 | NIL | 294.7  | NIL | 272.57 | NIL | 310.85 | ON  | 292.04 | NIL | 303.51 |
| 5812. pSymB | 2. SMB20989     | CDS | 1222968 | 1223686 - | 31 | 31 | NIL | 283.97 | NIL | 267.39 | NIL | 372.3  | NIL | 316.45 | NIL | 381.76 |
| 5813. pSymB | 2. SMB20990     | CDS | 1223683 | 1225119 - | 30 | 30 | ON  | 362.61 | ON  | 348.54 | ON  | 459.33 | ON  | 401.52 | ON  | 389.64 |
| 5814. pSymB | 2. SMB20991     | CDS | 1225248 | 1226711 - | 30 | 30 | ON  | 324.1  | ON  | 380.48 | ON  | 384.51 | ON  | 382.91 | NIL | 322.76 |
| 5815. pSymB | 2. SMB20992     | CDS | 1226455 | 1228248 - | 30 | 30 | ON  | 329.72 | NIL | 320.33 | NIL | 352.01 | ON  | 366.41 | ON  | 360.52 |
| 5816. pSymB | 2. SMB20993     | CDS | 1228528 | 1228528 + | 30 | 30 | NIL | 305.19 | ON  | 357.88 | NIL | 273.48 | NIL | 294.25 | NIL | 291.76 |
| 5817. pSymB | 2. SMB20994     | CDS | 1228814 | 1230025 + | 30 | 30 | NIL | 312.64 | ON  | 351.22 | NIL | 331.1  | NIL | 333.4  | NIL | 308.19 |
| 5818. pSymB | 2. SMB20995     | CDS | 1230297 | 1230830   | 30 | 30 | NIL | 404.65 | ON  | 501.01 | NIL | 333.36 | ON  | 395.73 | NIL | 356.62 |
| 5819. pSymB | engA. SMB20996  | CDS | 1231075 | 1232505 - | 30 | 30 | ON  | 465.31 | ON  | 393.05 | NIL | 326.97 | ON  | 369.91 | NIL | 337.64 |
| 5820. pSymB | 2. SMB20997     | CDS | 1232629 | 1233267 - | 30 | 30 | ON  | 457.27 | ON  | 393.05 | ON  | 408.14 | ON  | 372.52 | NIL | 356.74 |
| 5821. pSymB | 2. SMB20997     | CDS | 1233383 | 1233967 - | 30 | 30 | ON  | 554.97 | ON  | 469.3  | NIL | 346.61 | ON  | 384.3  | NIL | 429.19 |
| 5822. pSymB | 2. SMB20998     | CDS | 1234127 | 1235131 + | 30 | 30 | ON  | 316.18 | ON  | 335.14 | NIL | 278.2  | NIL | 282.57 | NIL | 289.93 |

|            |                |     |           |           |    |    |     |        |     |        |     |        |     |        |
|------------|----------------|-----|-----------|-----------|----|----|-----|--------|-----|--------|-----|--------|-----|--------|
| 5823 p5yMB | baCa.SMB20999  | CDS | 1235141   | 1236403 - | 30 | 30 | ON  | 372.5  | ON  | 343.55 | ON  | 340.76 | ON  | 348.37 |
| 5824 p5yMB | ?_SMB21000     | CDS | 1236556   | 1237689 - | 30 | 30 | NIL | 348.09 | NIL | 361.04 | ON  | 382.63 | NIL | 366.66 |
| 5825 p5yMB | ?_SMB21001     | CDS | 1237676   | 1239050 + | 31 | 30 | NIL | 288.68 | NIL | 278.97 | NIL | 299.96 | NIL | 278.03 |
| 5826 p5yMB | maP2.SMB21002  | CDS | 1238128   | 1238877 - | 30 | 30 | ON  | 377.1  | NIL | 357.41 | ON  | 429.97 | ON  | 397.26 |
| 5827 p5yMB | ?_SMB21003     | CDS | 1238942   | 1239985 - | 30 | 30 | ON  | 348.73 | NIL | 346.73 | NIL | 323.47 | NIL | 334.57 |
| 5828 p5yMB | ?_SMB21004     | CDS | 1240094   | 1240390 - | 30 | 30 | ON  | 326.82 | NIL | 350    | NIL | 355.42 | NIL | 330.01 |
| 5829 p5yMB | ?_SMB21005     | CDS | 1240562   | 1241029 - | 30 | 30 | ON  | 393.73 | ON  | 285.04 | NIL | 319.31 | NIL | 330.85 |
| 5830 p5yMB | ?_SMB21006     | CDS | 1241039   | 1241281 - | 30 | 30 | ON  | 356.2  | NIL | 273.71 | NIL | 273.83 | ON  | 291.61 |
| 5831 p5yMB | ?_SMB21007     | CDS | 1241319   | 1241738 - | 30 | 32 | ON  | 426.93 | ON  | 399.64 | NIL | 408.3  | ON  | 383.94 |
| 5832 p5yMB | gIPK.SMB21009  | CDS | 1241735   | 1242027 - | 30 | 30 | ON  | 457.8  | ON  | 379.25 | ON  | 364.57 | NIL | 292.57 |
| 5833 p5yMB | gIPK.SMB21009  | CDS | 1242315   | 1243808 - | 30 | 30 | ON  | 605.12 | ON  | 423.91 | ON  | 429.92 | NIL | 338.91 |
| 5834 p5yMB | bdA.SMB21010   | CDS | 1244108   | 1244884 + | 30 | 30 | ON  | 515.89 | ON  | 553.96 | ON  | 501.24 | ON  | 485.71 |
| 5835 p5yMB | bdA.SMB21011   | CDS | 1244928   | 1246415 + | 30 | 29 | ON  | 373.02 | ON  | 344.51 | ON  | 376.11 | NIL | 325.41 |
| 5836 p5yMB | xbB2.SMB20846  | CDS | 1246926   | 1248959 + | 30 | 30 | NIL | 299.87 | NIL | 305.07 | NIL | 351.06 | NIL | 317.96 |
| 5837 p5yMB | ?_SMB21676     | CDS | 1249726   | 1249619 - | 30 | 30 | NIL | 271.88 | NIL | 264.7  | NIL | 270.79 | NIL | 290.23 |
| 5838 p5yMB | ?_SMB20847     | CDS | 1249538   | 1250431 + | 30 | 30 | NIL | 310.72 | ON  | 327.39 | NIL | 337.53 | NIL | 317.53 |
| 5839 p5yMB | ?_SMB20848     | CDS | 1250520   | 1251752 + | 30 | 30 | ON  | 336.66 | ON  | 428.57 | NIL | 303.43 | ON  | 315.7  |
| 5840 p5yMB | gnaD2.SMB20849 | CDS | 1251749   | 1253065 + | 30 | 30 | NIL | 306.03 | ON  | 295.92 | NIL | 325.42 | ON  | 348.58 |
| 5841 p5yMB | lID3.SMB20850  | CDS | 1253180   | 1254316 + | 43 | 26 | NIL | 410.73 | ON  | 295.92 | NIL | 336.85 | NIL | 303.47 |
| 5842 p5yMB | ?_SMB20851     | CDS | 1254564   | 1255544 - | 31 | 31 | NIL | 282.37 | ON  | 312.6  | NIL | 476.56 | ON  | 410.33 |
| 5843 p5yMB | ?_SMB20852     | CDS | 1255541   | 1257070 - | 30 | 30 | ON  | 328.62 | ON  | 333.22 | NIL | 337.4  | ON  | 320.89 |
| 5844 p5yMB | ?_SMB20853     | CDS | 1258133 - | 1258133 - | 30 | 30 | ON  | 302.05 | ON  | 298.39 | ON  | 328.11 | NIL | 291.68 |
| 5845 p5yMB | ?_SMB20854     | CDS | 1258311   | 1259306 - | 31 | 31 | ON  | 316.9  | NIL | 299.42 | ON  | 323.08 | ON  | 300.51 |
| 5846 p5yMB | ?_SMB20855     | CDS | 1259303   | 1260817 - | 30 | 30 | NIL | 281.25 | NIL | 288.26 | NIL | 341.1  | ON  | 342.07 |
| 5847 p5yMB | ?_SMB20856     | CDS | 1260905   | 1261873 - | 30 | 30 | NIL | 375.44 | ON  | 428.32 | NIL | 342.06 | ON  | 311.78 |
| 5848 p5yMB | ?_SMB20857     | CDS | 1262117   | 1262719 + | 30 | 30 | NIL | 295.99 | NIL | 317.89 | NIL | 359.76 | ON  | 349.49 |
| 5849 p5yMB | ?_SMB20858     | CDS | 1262876   | 1263361 + | 30 | 13 | NIL | 351.96 | ON  | 344.86 | ON  | 493.82 | ON  | 482.66 |
| 5850 p5yMB | ?_SMB20859     | CDS | 1263877   | 1264827 + | 30 | 30 | NIL | 289.33 | NIL | 279.88 | NIL | 327.28 | NIL | 314.85 |
| 5851 p5yMB | ?_SMB21677     | CDS | 1264909   | 1265277 - | 30 | 30 | NIL | 250.58 | NIL | 240.84 | NIL | 336.01 | NIL | 328.06 |
| 5852 p5yMB | ?_SMB20860     | CDS | 1265267   | 1266097 + | 30 | 30 | NIL | 274.36 | NIL | 269.05 | NIL | 288.63 | NIL | 341.26 |
| 5853 p5yMB | ?_SMB20861     | CDS | 1266196   | 1267401 + | 30 | 30 | ON  | 334.53 | ON  | 338.22 | NIL | 331.56 | NIL | 302.21 |
| 5854 p5yMB | ?_SMB20862     | CDS | 1267541   | 1267981 + | 31 | 29 | NIL | 281.18 | NIL | 263.09 | NIL | 306.91 | NIL | 302.91 |
| 5855 p5yMB | ?_SMB20863     | CDS | 1268306   | 1269337 - | 30 | 30 | NIL | 307.47 | NIL | 306.26 | NIL | 347.71 | NIL | 343.45 |
| 5856 p5yMB | ?_SMB20864     | CDS | 1269410   | 1269835 - | 30 | 30 | NIL | 298.61 | ON  | 335.82 | NIL | 329.17 | NIL | 341.44 |
| 5857 p5yMB | ?_SMB20865     | CDS | 1269899   | 1270651 - | 30 | 30 | NIL | 309.21 | NIL | 335.82 | NIL | 339.75 | NIL | 342.57 |
| 5858 p5yMB | ?_SMB20866     | CDS | 1270798   | 1271715 - | 30 | 30 | NIL | 356.4  | NIL | 311.76 | NIL | 332.97 | NIL | 297.11 |
| 5859 p5yMB | ?_SMB20867     | CDS | 1271771   | 1272121 - | 30 | 30 | NIL | 224.37 | NIL | 366.71 | ON  | 281.46 | ON  | 370.16 |
| 5860 p5yMB | ?_SMB20868     | CDS | 1272317   | 1276006 + | 30 | 30 | NIL | 315.02 | NIL | 302.08 | NIL | 353.1  | NIL | 296.09 |
| 5861 p5yMB | ?_SMB20869     | CDS | 1276480   | 1277181 + | 30 | 30 | NIL | 283.12 | NIL | 313.12 | NIL | 326.33 | NIL | 304.32 |
| 5862 p5yMB | ?_SMB20870     | CDS | 1277200   | 1278096 - | 30 | 30 | ON  | 362.55 | ON  | 396.51 | NIL | 355.06 | NIL | 375.5  |
| 5863 p5yMB | ?_SMB20871     | CDS | 1278191   | 1278940 + | 30 | 30 | ON  | 345.06 | ON  | 376.14 | NIL | 343.26 | ON  | 361.82 |
| 5864 p5yMB | ?_SMB20872     | CDS | 1279079   | 1279468 - | 30 | 30 | ON  | 362.01 | ON  | 421.08 | ON  | 405.8  | ON  | 382.44 |
| 5865 p5yMB | hIA.SMB20873   | CDS | 1280236   | 1280748 - | 30 | 30 | ON  | 525.83 | ON  | 422.71 | ON  | 401.25 | ON  | 389.89 |
| 5866 p5yMB | ?_SMB20874     | CDS | 1280845   | 1281348 - | 31 | 31 | ON  | 375.6  | ON  | 442.05 | NIL | 359.16 | NIL | 330.95 |
| 5867 p5yMB | ?_SMB20875     | CDS | 1281348   | 1282277 - | 30 | 30 | ON  | 406.03 | ON  | 446.09 | ON  | 445.09 | ON  | 369.16 |
| 5868 p5yMB | ?_SMB20876     | CDS | 1282355   | 1283152 - | 30 | 30 | ON  | 366.18 | ON  | 338.45 | ON  | 335.99 | NIL | 330.53 |
| 5869 p5yMB | ?_SMB20877     | CDS | 1283304   | 1284434 - | 30 | 30 | ON  | 326.5  | NIL | 318.45 | NIL | 414.07 | ON  | 398.59 |
| 5870 p5yMB | ?_SMB20878     | CDS | 1284474   | 1285190 + | 30 | 30 | ON  | 326.79 | ON  | 325.33 | NIL | 334.76 | NIL | 334.63 |
| 5871 p5yMB | ?_SMB20879     | CDS | 1285211   | 1285663 - | 30 | 30 | ON  | 340.16 | ON  | 458.71 | ON  | 469.83 | ON  | 388.17 |
| 5872 p5yMB | hIE2.SMB20880  | CDS | 1285642   | 1287773 + | 30 | 30 | ON  | 536.48 | ON  | 372.57 | NIL | 433.72 | ON  | 385.73 |
| 5873 p5yMB | ?_SMB20881     | CDS | 1288031   | 1288492 - | 30 | 30 | NIL | 256.16 | NIL | 251.41 | NIL | 417.93 | NIL | 343.28 |
| 5874 p5yMB | ?_SMB20882     | CDS | 1288541   | 1288990 - | 30 | 30 | NIL | 290.79 | NIL | 291.48 | NIL | 331.35 | NIL | 358.11 |
| 5875 p5yMB | ?_SMB20883     | CDS | 1289174   | 1289641 - | 30 | 30 | ON  | 321.21 | NIL | 316.41 | ON  | 417.04 | ON  | 422.99 |
| 5876 p5yMB | ?_SMB20884     | CDS | 1289684   | 1290178 - | 30 | 30 | ON  | 384.2  | ON  | 400.24 | ON  | 392.04 | ON  | 370.02 |
| 5877 p5yMB | ?_SMB20885     | CDS | 1290167   | 1291087 - | 30 | 30 | ON  | 382.59 | ON  | 340.38 | ON  | 371.82 | ON  | 328.18 |
| 5878 p5yMB | ?_SMB20886     | CDS | 1291462   | 1292871 + | 30 | 30 | NIL | 329.21 | NIL | 314    | NIL | 332.74 | NIL | 335.24 |
| 5879 p5yMB | ?_SMB20887     | CDS | 1292871   | 1294652 + | 30 | 30 | NIL | 280.49 | NIL | 310.46 | NIL | 308.49 | NIL | 294.8  |
| 5880 p5yMB | ?_SMB20888     | CDS | 1293834   | 1294652 + | 30 | 30 | ON  | 365.55 | ON  | 333.93 | NIL | 374.25 | ON  | 374.25 |
| 5881 p5yMB | hIV5.SMB20890  | CDS | 1294748   | 1295435 - | 30 | 30 | ON  | 388.22 | ON  | 375.14 | ON  | 384.85 | ON  | 385.62 |
| 5882 p5yMB | ?_SMB20891     | CDS | 1295635   | 1297374 - | 30 | 30 | ON  | 450.14 | ON  | 398.67 | ON  | 407.91 | ON  | 414.16 |
| 5883 p5yMB | gquC.SMB20892  | CDS | 1297433   | 1298866 - | 30 | 30 | ON  | 416.94 | ON  | 370.97 | ON  | 376.98 | ON  | 356.07 |
| 5884 p5yMB | gquB.SMB20893  | CDS | 1298943   | 1299386 - | 30 | 30 | ON  | 524.58 | ON  | 502.86 | ON  | 411.24 | ON  | 455.47 |
| 5885 p5yMB | gquB.SMB20893  | CDS | 1300085   | 1301299 - | 30 | 30 | ON  | 391.69 | ON  | 383.25 | NIL | 332.97 | ON  | 320.26 |
| 5886 p5yMB | gquA.SMB20894  | CDS | 1301299   | 1302819 - | 30 | 30 | ON  | 441.88 | ON  | 428.2  | ON  | 350.78 | ON  | 389.9  |
| 5887 p5yMB | chVE.SMB20895  | CDS | 1303027   | 1304094 - | 30 | 30 | ON  | 531.23 | ON  | 441.57 | NIL | 526.39 | ON  | 387.17 |
| 5888 p5yMB | gPhR.SMB20896  | CDS | 1304441   | 1305349 + | 30 | 30 | NIL | 304.77 | NIL | 315.06 | NIL | 326.23 | NIL | 314.67 |
| 5889 p5yMB | ?_SMB20897     | CDS | 1305614   | 1306866 + | 30 | 30 | NIL | 287.69 | NIL | 257.69 | ON  | 332.14 | ON  | 319.3  |
| 5890 p5yMB | ?_SMB20898     | CDS | 1306870   | 1306800 - | 30 | 30 | NIL | 295.28 | NIL | 290.6  | NIL | 232.31 | NIL | 274.41 |
| 5891 p5yMB | ?_SMB21678     | CDS | 1306533   | 1306524 + | 30 | 30 | NIL | 291.06 | NIL | 273    | NIL | 274.77 | NIL | 297.25 |
| 5892 p5yMB | hIA.SMB20899   | CDS | 1306775   | 1307767 + | 30 | 30 | NIL | 651.84 | NIL | 310.3  | NIL | 320.82 | NIL | 342.99 |
| 5893 p5yMB | ?_SMB20900     | CDS | 1307831   | 1309765 - | 30 | 30 | ON  | 378.25 | ON  | 358.23 | ON  | 441.93 | ON  | 371.41 |
| 5894 p5yMB | ?_SMB21679     | CDS | 1309775   | 1309963 + | 30 | 30 | NIL | 261.98 | NIL | 272.74 | NIL | 379.51 | NIL | 299.69 |

|      |       |                     |      |         |         |   |    |    |     |        |     |         |     |        |     |        |     |        |
|------|-------|---------------------|------|---------|---------|---|----|----|-----|--------|-----|---------|-----|--------|-----|--------|-----|--------|
| 5895 | ψSymB | ψ_SMB20901          | CDS  | 1310089 | 1313300 | - | 30 | 30 | ON  | 322.17 | ON  | 357.33  | NIL | 290.45 | NIL | 313.17 | NIL | 321.3  |
| 5896 | ψSymB | ψ_SMB20902          | CDS  | 1311686 | 1312723 | - | 30 | 30 | ON  | 807.03 | ON  | 1681.16 | NIL | 363.99 | ON  | 459.74 | ON  | 392.22 |
| 5897 | ψSymB | ψ_SMB20903          | CDS  | 1312839 | 1314200 | + | 30 | 30 | ON  | 758.6  | ON  | 1650.03 | NIL | 364.18 | ON  | 358.37 | ON  | 374.15 |
| 5898 | ψSymB | ψ_SMB20904          | CDS  | 1314215 | 1315000 | + | 30 | 30 | ON  | 696.3  | ON  | 663.42  | NIL | 311.32 | ON  | 354.83 | NIL | 348.31 |
| 5899 | ψSymB | IRNAUNK-1: SMB21712 | IRNA | 1315182 | 1315238 | + | 30 | 30 | ON  | 622.64 | ON  | 568.62  | NIL | 263.3  | ON  | 392.9  | NIL | 279.59 |
| 5900 | ψSymB | ψ_SMB20905          | CDS  | 1315297 | 1316469 | + | 30 | 30 | NIL | 303.4  | ON  | 286.08  | NIL | 342.35 | NIL | 323.87 | NIL | 314.66 |
| 5901 | ψSymB | ψ_SMB20906          | CDS  | 1315960 | 1317265 | + | 31 | 31 | NIL | 241.89 | NIL | 265.07  | NIL | 276.01 | NIL | 282.5  | NIL | 303.7  |
| 5902 | ψSymB | ψ_SMB20907          | CDS  | 1317258 | 1317563 | + | 30 | 30 | NIL | 247.83 | NIL | 252.24  | NIL | 281.55 | NIL | 258.82 | NIL | 281.23 |
| 5903 | ψSymB | ψ_SMB20908          | CDS  | 1317788 | 1318126 | - | 30 | 30 | NIL | 240.39 | NIL | 231.18  | NIL | 257.16 | NIL | 245.07 | NIL | 280.19 |
| 5904 | ψSymB | ψ_SMB21680          | CDS  | 1318157 | 1318312 | - | 30 | 30 | NIL | 229.56 | NIL | 229.27  | NIL | 238.4  | NIL | 270.24 | NIL | 292.82 |
| 5905 | ψSymB | ψ_SMB21681          | CDS  | 1318407 | 1318583 | + | 30 | 30 | NIL | 279.27 | NIL | 290.03  | ON  | 380.23 | NIL | 330.23 | NIL | 349.33 |
| 5906 | ψSymB | ψ_SMB20909          | CDS  | 1318695 | 1318988 | - | 30 | 30 | NIL | 263.25 | ON  | 343.3   | NIL | 229.43 | NIL | 229.43 | NIL | 279.72 |
| 5907 | ψSymB | ψ_SMB20910          | CDS  | 1319047 | 1319355 | - | 30 | 30 | NIL | 254.43 | ON  | 330.36  | NIL | 274.19 | ON  | 381.36 | NIL | 333.29 |
| 5908 | ψSymB | ψ_SMB20911          | CDS  | 1319580 | 1319786 | - | 30 | 30 | NIL | 414.19 | ON  | 710.45  | NIL | 281.43 | ON  | 490.99 | ON  | 405.3  |
| 5909 | ψSymB | ψ_SMB20912          | CDS  | 1319810 | 1320904 | - | 30 | 30 | ON  | 341.7  | ON  | 325.81  | NIL | 347.14 | ON  | 440.99 | NIL | 294.13 |
| 5910 | ψSymB | ψ_SMB20913          | CDS  | 1320886 | 1321488 | + | 34 | 33 | ON  | 339.43 | ON  | 369.31  | ON  | 388.08 | ON  | 385.6  | ON  | 381.48 |
| 5911 | ψSymB | ψ_SMB21682          | CDS  | 1321481 | 1321664 | + | 30 | 30 | NIL | 300.13 | NIL | 279.88  | NIL | 347.63 | ON  | 339.91 | NIL | 372.82 |
| 5912 | ψSymB | ψ_SMB20914          | CDS  | 1321684 | 1322604 | + | 30 | 30 | NIL | 295.9  | NIL | 316.07  | NIL | 308.5  | NIL | 293.93 | NIL | 372.82 |
| 5913 | ψSymB | 8sM11: SMB20915     | CDS  | 1322896 | 1324509 | + | 30 | 30 | NIL | 349.41 | ON  | 663.17  | ON  | 419.46 | ON  | 467.76 | ON  | 402.17 |
| 5914 | ψSymB | ψ_SMB20916          | CDS  | 1324615 | 1324875 | - | 30 | 30 | NIL | 258.96 | NIL | 296.99  | NIL | 265.86 | NIL | 260.52 | ON  | 420.17 |
| 5915 | ψSymB | Trm1-a-6: SMB20918  | CDS  | 1325890 | 1326282 | + | 48 | 0  | NIL | 558.03 | ON  | 449.52  | ON  | 385.05 | ON  | 545.86 | ON  | 478.71 |
| 5916 | ψSymB | Trm1-b-6: SMB20919  | CDS  | 1326279 | 1327109 | + | 30 | 0  | ON  | 539.44 | ON  | 419.21  | ON  | 309.11 | ON  | 358.27 | NIL | 305.8  |
| 5917 | ψSymB | ψ_SMB20920          | CDS  | 1327059 | 1327481 | - | 74 | 28 | ON  | 223.62 | NIL | 239.96  | NIL | 230.53 | NIL | 232.06 | NIL | 266.16 |
| 5918 | ψSymB | ψ_SMB20921          | CDS  | 1327536 | 1327778 | - | 31 | 9  | ON  | 477.22 | ON  | 339.62  | ON  | 547.71 | ON  | 574.53 | ON  | 456.5  |
| 5919 | ψSymB | ψ_SMB20922          | CDS  | 1327653 | 1328715 | - | 41 | 23 | NIL | 394.72 | ON  | 399.62  | ON  | 385.24 | NIL | 365.02 | ON  | 368.76 |
| 5920 | ψSymB | ψ_SMB21395          | CDS  | 1328742 | 1329278 | + | 33 | 29 | NIL | 251.58 | NIL | 256.4   | NIL | 284.19 | NIL | 276.64 | NIL | 285.65 |
| 5921 | ψSymB | ψ_SMB21396          | CDS  | 1329334 | 1329780 | + | 30 | 30 | NIL | 294.67 | NIL | 309.76  | NIL | 363.58 | ON  | 337.31 | NIL | 334.89 |
| 5922 | ψSymB | ψ_SMB21397          | CDS  | 1330046 | 1330282 | + | 30 | 30 | NIL | 268.26 | NIL | 252.19  | NIL | 251.71 | NIL | 291.17 | NIL | 297.68 |
| 5923 | ψSymB | ψ_SMB21398          | CDS  | 1330313 | 1330531 | + | 30 | 29 | ON  | 351.03 | ON  | 333.22  | NIL | 374.38 | ON  | 364.39 | NIL | 332.46 |
| 5924 | ψSymB | ψ_SMB21399          | CDS  | 1330868 | 1331272 | - | 30 | 30 | NIL | 308.84 | ON  | 369.3   | NIL | 280    | NIL | 279.01 | NIL | 258.63 |
| 5925 | ψSymB | ψ_SMB21683          | CDS  | 1331308 | 1331499 | - | 30 | 30 | NIL | 364.52 | ON  | 453.87  | NIL | 264.77 | NIL | 388.49 | NIL | 314.81 |
| 5926 | ψSymB | ψ_SMB21400          | CDS  | 1331585 | 1331821 | + | 30 | 30 | NIL | 227.2  | NIL | 248.38  | NIL | 300.34 | NIL | 251.89 | NIL | 302.84 |
| 5927 | ψSymB | ψ_SMB21401          | CDS  | 1331870 | 1332220 | + | 30 | 30 | NIL | 239.68 | NIL | 235.16  | NIL | 257.58 | NIL | 255.02 | NIL | 289.32 |
| 5928 | ψSymB | ψ_SMB21402          | CDS  | 1332769 | 1333932 | + | 30 | 29 | ON  | 444.97 | ON  | 419.28  | ON  | 431.61 | ON  | 435.47 | ON  | 388.47 |
| 5929 | ψSymB | ψ_SMB21403          | CDS  | 1335358 | 1335813 | + | 30 | 30 | NIL | 249.14 | NIL | 254.25  | NIL | 311.98 | NIL | 285.39 | NIL | 287.74 |
| 5930 | ψSymB | ψ_SMB21404          | CDS  | 1335895 | 1336335 | + | 31 | 30 | NIL | 329.13 | ON  | 376.84  | NIL | 273.16 | NIL | 364.2  | ON  | 341.44 |
| 5931 | ψSymB | ψ_SMB21405          | CDS  | 1336523 | 1336976 | + | 30 | 30 | NIL | 256.8  | NIL | 303.92  | NIL | 300.44 | NIL | 325.57 | NIL | 283.72 |
| 5932 | ψSymB | ψ_SMB21406          | CDS  | 1337146 | 1338030 | + | 30 | 30 | NIL | 303.84 | NIL | 283.64  | NIL | 329.29 | NIL | 335.31 | NIL | 348.06 |
| 5933 | ψSymB | ψ_SMB21407          | CDS  | 1338042 | 1338860 | + | 30 | 30 | NIL | 263.23 | NIL | 283.9   | NIL | 288.67 | NIL | 285.83 | NIL | 288.29 |
| 5934 | ψSymB | ψ_SMB21408          | CDS  | 1339553 | 1339925 | + | 30 | 30 | NIL | 298.81 | NIL | 317.14  | NIL | 370.9  | NIL | 327.93 | NIL | 322.65 |
| 5935 | ψSymB | ψ_SMB21409          | CDS  | 1339553 | 1340117 | - | 30 | 30 | NIL | 277.52 | NIL | 308.97  | NIL | 299.84 | NIL | 315.44 | NIL | 276.69 |
| 5936 | ψSymB | ψ_SMB21410          | CDS  | 1340162 | 1341031 | + | 30 | 30 | NIL | 279.81 | NIL | 306.97  | NIL | 299.84 | NIL | 315.44 | NIL | 276.69 |
| 5937 | ψSymB | ψ_SMB21411          | CDS  | 1341243 | 1341656 | + | 30 | 30 | NIL | 279.81 | NIL | 306.97  | NIL | 299.84 | NIL | 315.44 | NIL | 276.69 |
| 5938 | ψSymB | ψ_SMB21412          | CDS  | 1341717 | 1342142 | - | 30 | 30 | NIL | 270.07 | NIL | 303.28  | NIL | 311.27 | NIL | 320.6  | NIL | 324.71 |
| 5939 | ψSymB | ψ_SMB21413          | CDS  | 1342162 | 1342728 | - | 30 | 30 | NIL | 272.09 | NIL | 303.28  | ON  | 379.33 | NIL | 322.44 | NIL | 323.55 |
| 5940 | ψSymB | ψ_SMB21414          | CDS  | 1342802 | 1344223 | - | 30 | 30 | NIL | 377.05 | ON  | 388.35  | ON  | 458.94 | ON  | 409.09 | NIL | 409.73 |
| 5941 | ψSymB | ψ_SMB21415          | CDS  | 1345266 | 1345705 | - | 30 | 30 | ON  | 314.26 | ON  | 335.04  | NIL | 330.3  | ON  | 351.19 | NIL | 307.44 |
| 5942 | ψSymB | ddhA: SMB21416      | CDS  | 1345948 | 1346715 | + | 30 | 30 | ON  | 415.11 | ON  | 327.44  | NIL | 312.79 | NIL | 332.79 | NIL | 336.88 |
| 5943 | ψSymB | ddhB: SMB21417      | CDS  | 1346712 | 1347782 | + | 30 | 30 | ON  | 389.61 | NIL | 319.92  | ON  | 443.72 | ON  | 335.31 | NIL | 371.52 |
| 5944 | ψSymB | ψ_SMB21418          | CDS  | 1347789 | 1349931 | + | 30 | 30 | ON  | 428.21 | ON  | 359.93  | NIL | 360.63 | ON  | 367.41 | ON  | 389.66 |
| 5945 | ψSymB | ψ_SMB21419          | CDS  | 1349044 | 1349931 | + | 30 | 30 | NIL | 281.01 | ON  | 317.79  | NIL | 292.96 | NIL | 302.6  | NIL | 326.04 |
| 5946 | ψSymB | ψ_SMB21684          | CDS  | 1349553 | 1350180 | + | 30 | 30 | NIL | 245.58 | NIL | 280.15  | NIL | 302.44 | NIL | 270.39 | NIL | 317.59 |
| 5947 | ψSymB | ψ_SMB21420          | CDS  | 1350177 | 1351604 | + | 30 | 30 | NIL | 312.97 | NIL | 325.47  | NIL | 396.99 | NIL | 330.19 | NIL | 326.65 |
| 5948 | ψSymB | ψ_SMB21421          | CDS  | 1351678 | 1352739 | + | 30 | 30 | ON  | 279.55 | ON  | 287.68  | ON  | 353.67 | ON  | 326.08 | ON  | 306.37 |
| 5949 | ψSymB | ψ_SMB21422          | CDS  | 1352736 | 1354232 | + | 30 | 30 | NIL | 303.03 | NIL | 312.68  | NIL | 340.1  | NIL | 323.78 | NIL | 334.31 |
| 5950 | ψSymB | ψ_SMB21423          | CDS  | 1354225 | 1355220 | + | 30 | 30 | NIL | 278.2  | NIL | 315.82  | NIL | 306.08 | NIL | 323.78 | NIL | 334.31 |
| 5951 | ψSymB | ψ_SMB21424          | CDS  | 1355223 | 1356259 | + | 30 | 30 | NIL | 346.06 | ON  | 341.39  | ON  | 416.24 | ON  | 358.28 | NIL | 350.6  |
| 5952 | ψSymB | ψ_SMB21425          | CDS  | 1357006 | 1357782 | - | 30 | 30 | ON  | 464.87 | ON  | 339.59  | NIL | 327.93 | ON  | 353.54 | NIL | 327.02 |
| 5953 | ψSymB | ψ_SMB21426          | CDS  | 1357784 | 1358626 | - | 30 | 30 | ON  | 364.41 | ON  | 324.56  | NIL | 306.96 | NIL | 322.39 | NIL | 308.25 |
| 5954 | ψSymB | ψ_SMB21427          | CDS  | 1358626 | 1359114 | - | 30 | 30 | ON  | 417.61 | NIL | 318.99  | NIL | 312.19 | ON  | 369.14 | NIL | 326.66 |
| 5955 | ψSymB | rm1C: SMB21428      | CDS  | 1359826 | 1359833 | + | 30 | 30 | ON  | 357.89 | NIL | 354.55  | NIL | 350.37 | ON  | 368.74 | NIL | 322.72 |
| 5956 | ψSymB | ψ_SMB21429          | CDS  | 1359858 | 1360619 | - | 31 | 31 | ON  | 380.96 | ON  | 400.51  | ON  | 446.13 | ON  | 380.7  | NIL | 357.31 |
| 5957 | ψSymB | ψ_SMB21430          | CDS  | 1360613 | 1361683 | - | 30 | 30 | ON  | 360.17 | ON  | 400.8   | ON  | 446.13 | ON  | 380.7  | NIL | 357.31 |
| 5958 | ψSymB | ψ_SMB21431          | CDS  | 1361810 | 1362232 | - | 30 | 30 | ON  | 355.69 | ON  | 400.8   | ON  | 382.38 | ON  | 392.17 | NIL | 344.57 |
| 5959 | ψSymB | ψ_SMB21432          | CDS  | 1362735 | 1362942 | - | 30 | 30 | ON  | 637.22 | ON  | 741.57  | ON  | 740.82 | ON  | 557.13 | NIL | 490.33 |
| 5960 | ψSymB | ψ_SMB21433          | CDS  | 1363048 | 1363857 | + | 30 | 30 | ON  | 355.89 | ON  | 390.03  | NIL | 397.66 | ON  | 372.86 | NIL | 352.63 |
| 5961 | ψSymB | ψ_SMB21685          | CDS  | 1363965 | 1364120 | + | 30 | 30 | NIL | 312.98 | NIL | 286.8   | ON  | 397.66 | ON  | 372.86 | NIL | 352.63 |
| 5962 | ψSymB | ψ_SMB21434          | CDS  | 1364130 | 1365050 | + | 30 | 30 | NIL | 289.28 | NIL | 301.88  | NIL | 335.57 | NIL | 375.87 | NIL | 320.71 |
| 5963 | ψSymB | ψ_SMB21435          | CDS  | 1365106 | 1366350 | - | 30 | 30 | ON  | 341.82 | ON  | 329.59  | ON  | 388.27 | ON  | 353.62 | NIL | 342.83 |
| 5964 | ψSymB | ψ_SMB21436          | CDS  | 1365387 | 1367667 | - | 30 | 30 | ON  | 391.25 | ON  | 358.75  | NIL | 342.95 | ON  | 376.04 | NIL | 351.31 |
| 5965 | ψSymB | ψ_SMB21437          | CDS  | 1367664 | 1368224 | - | 30 | 30 | ON  | 336.05 | NIL | 318.89  | NIL | 314.43 | NIL | 307.48 | NIL | 320.43 |
| 5966 | ψSymB | ψ_SMB21438          | CDS  | 1368224 | 1369222 | - | 30 | 30 | ON  | 317.9  | NIL | 311.15  | ON  | 376.75 | NIL | 325.91 | NIL | 325.4  |

|            |                  |     |         |           |    |    |     |        |     |        |     |        |     |        |     |        |
|------------|------------------|-----|---------|-----------|----|----|-----|--------|-----|--------|-----|--------|-----|--------|-----|--------|
| 5967 pSyMB | ?_SMB21439       | CDS | 1369358 | 1369750 - | 30 | 30 | ON  | 335.33 | ON  | 353.39 | NIL | 309.86 | NIL | 333.74 | NIL | 304.68 |
| 5968 pSyMB | ?_SMB21440       | CDS | 1370059 | 1370493 + | 30 | 30 | ON  | 428.61 | ON  | 520.98 | NIL | 475.84 | ON  | 493.79 | ON  | 401.47 |
| 5969 pSyMB | ?_SMB21441       | CDS | 1371045 | 1371407 + | 30 | 30 | NIL | 295.21 | ON  | 324.46 | NIL | 339.73 | NIL | 326.55 | NIL | 314.02 |
| 5970 pSyMB | ?_SMB21442       | CDS | 1371498 | 1371947 - | 30 | 28 | ON  | 361.31 | ON  | 536.48 | ON  | 422.34 | ON  | 488.85 | ON  | 385.48 |
| 5971 pSyMB | ?_SMB21443       | CDS | 1372313 | 1372313 - | 30 | 30 | ON  | 387.05 | ON  | 457.08 | ON  | 543    | ON  | 388.14 | ON  | 419.43 |
| 5972 pSyMB | ?_SMB21444       | CDS | 1373031 | 1373074 + | 30 | 30 | ON  | 325.33 | ON  | 345.58 | ON  | 416.03 | ON  | 384.15 | ON  | 392.6  |
| 5973 pSyMB | ?_SMB21445       | CDS | 1373479 | 1374534 - | 30 | 30 | ON  | 326.13 | ON  | 341.56 | ON  | 419.51 | ON  | 400.71 | NIL | 379.84 |
| 5974 pSyMB | gigB2_SMB21446   | CDS | 1374614 | 1376710 - | 30 | 30 | ON  | 323.42 | ON  | 329.67 | ON  | 406.59 | NIL | 304.29 | NIL | 353.66 |
| 5975 pSyMB | gigB2_SMB21447   | CDS | 1374614 | 1376853   | 30 | 30 | ON  | 336.8  | ON  | 330.03 | ON  | 382.75 | NIL | 373.6  | NIL | 347.82 |
| 5976 pSyMB | gigB2_SMB21448   | CDS | 1378745 | 1379386 + | 30 | 30 | NIL | 305.84 | ON  | 326.93 | NIL | 408.64 | NIL | 334.92 | ON  | 339.21 |
| 5977 pSyMB | gsl12.2_SMB21449 | CDS | 1378931 | 1380713 - | 30 | 30 | NIL | 322.92 | ON  | 322.33 | NIL | 333.52 | ON  | 309.26 | ON  | 409.07 |
| 5978 pSyMB | ?_SMB21450       | CDS | 1380308 | 1380847 + | 30 | 30 | NIL | 287.94 | ON  | 327.13 | NIL | 374.86 | ON  | 368.55 | NIL | 333.45 |
| 5979 pSyMB | ?_SMB21452       | CDS | 1381032 | 1381556 + | 30 | 30 | NIL | 267.15 | ON  | 358.03 | ON  | 462.71 | ON  | 472.12 | ON  | 312.99 |
| 5980 pSyMB | ?_SMB21454       | CDS | 1381823 | 1382137 - | 30 | 30 | NIL | 346.88 | ON  | 322.49 | NIL | 315.87 | ON  | 315.87 | ON  | 312.99 |
| 5981 pSyMB | ?_SMB21455       | CDS | 1382140 | 1383507 - | 30 | 30 | NIL | 389.23 | ON  | 474.37 | NIL | 367.94 | ON  | 384.38 | ON  | 379.38 |
| 5982 pSyMB | ?_SMB21456       | CDS | 1383791 | 1384228 - | 30 | 30 | NIL | 279.76 | ON  | 395.84 | NIL | 350.97 | ON  | 290.77 | NIL | 331.71 |
| 5983 pSyMB | ?_SMB21458       | CDS | 1384373 | 1385248 - | 30 | 30 | NIL | 306    | NIL | 289.38 | NIL | 262.42 | NIL | 290.77 | NIL | 269.45 |
| 5984 pSyMB | ?_SMB21459       | CDS | 1385260 | 1386153 - | 30 | 31 | NIL | 315.07 | ON  | 299.38 | NIL | 350.47 | NIL | 319.78 | NIL | 312.98 |
| 5985 pSyMB | ?_SMB21460       | CDS | 1387650 | 1387262 - | 30 | 30 | NIL | 303.77 | ON  | 321.78 | NIL | 314.67 | NIL | 320.84 | NIL | 355.1  |
| 5986 pSyMB | ?_SMB21461       | CDS | 1387351 | 1388613 - | 30 | 30 | NIL | 338.67 | ON  | 321.86 | ON  | 394.4  | ON  | 361.03 | NIL | 343.29 |
| 5987 pSyMB | ?_SMB21462       | CDS | 1388649 | 1389584 - | 31 | 31 | ON  | 402.9  | ON  | 378.91 | ON  | 393.18 | ON  | 396.84 | ON  | 353.11 |
| 5988 pSyMB | ?_SMB21463       | CDS | 1389575 | 1390960 - | 30 | 30 | ON  | 385.41 | ON  | 353.67 | ON  | 426.11 | ON  | 365.52 | ON  | 441.01 |
| 5989 pSyMB | ?_SMB21464       | CDS | 1391174 | 1391947 + | 30 | 30 | ON  | 355.39 | ON  | 351.6  | NIL | 356.29 | ON  | 347.05 | ON  | 316.63 |
| 5990 pSyMB | prse_SMB21465    | CDS | 1392048 | 1393367 - | 30 | 30 | ON  | 403.57 | ON  | 446.87 | ON  | 451.32 | ON  | 436.64 | ON  | 462.99 |
| 5991 pSyMB | prse_SMB21466    | CDS | 1393364 | 1395132 - | 30 | 30 | ON  | 355.69 | ON  | 340.88 | NIL | 310.97 | NIL | 319.01 | NIL | 321.79 |
| 5992 pSyMB | ?_SMB21467       | CDS | 1395370 | 1395714 - | 30 | 30 | NIL | 288.39 | NIL | 307.13 | NIL | 315.98 | NIL | 321.94 | NIL | 297.46 |
| 5993 pSyMB | ?_SMB21468       | CDS | 1395922 | 1397019 - | 30 | 30 | NIL | 313.04 | NIL | 288.42 | NIL | 272.36 | NIL | 287.83 | NIL | 286.41 |
| 5994 pSyMB | ?_SMB21469       | CDS | 1397116 | 1397625 + | 30 | 30 | NIL | 309.42 | ON  | 371.9  | NIL | 356.04 | NIL | 333.42 | NIL | 371.96 |
| 5995 pSyMB | ?_SMB21470       | CDS | 1397735 | 1398016 + | 36 | 36 | ON  | 312.86 | ON  | 317.36 | NIL | 322.67 | NIL | 293.03 | NIL | 310.14 |
| 5996 pSyMB | ?_SMB21471       | CDS | 1397994 | 1398242 + | 30 | 30 | NIL | 311.95 | ON  | 340.91 | ON  | 379.8  | NIL | 327.77 | NIL | 321.24 |
| 5997 pSyMB | ?_SMB21472       | CDS | 1398286 | 1398825 + | 30 | 30 | NIL | 235.32 | NIL | 273.52 | NIL | 308.93 | NIL | 280.57 | NIL | 284.41 |
| 5998 pSyMB | ?_SMB21473       | CDS | 1398866 | 1399300 + | 30 | 30 | NIL | 265.6  | NIL | 312.04 | NIL | 324.5  | NIL | 318.97 | NIL | 314.76 |
| 5999 pSyMB | ?_SMB21474       | CDS | 1399297 | 1400079 + | 30 | 30 | ON  | 389.77 | ON  | 516.73 | ON  | 430.11 | ON  | 436.53 | ON  | 381.47 |
| 6000 pSyMB | ?_SMB21475       | CDS | 1400596 | 1400599 + | 30 | 30 | NIL | 267.79 | NIL | 292.16 | NIL | 338.49 | NIL | 276    | NIL | 336.83 |
| 6001 pSyMB | ?_SMB21476       | CDS | 1400599 | 1400599 + | 30 | 27 | NIL | 266.8  | NIL | 266.8  | NIL | 253.58 | NIL | 248.54 | NIL | 341.7  |
| 6002 pSyMB | ?_SMB21477       | CDS | 1400599 | 1400946 + | 35 | 35 | NIL | 286.79 | NIL | 347.41 | NIL | 380.66 | NIL | 342.51 | NIL | 339.64 |
| 6003 pSyMB | ?_SMB21478       | CDS | 1400899 | 1402077 + | 38 | 10 | ON  | 302.68 | ON  | 362.41 | NIL | 329.49 | NIL | 302.8  | NIL | 328.06 |
| 6004 pSyMB | ?_SMB21479       | CDS | 1402093 | 1403329 + | 30 | 22 | ON  | 361.19 | ON  | 491.07 | NIL | 424.12 | ON  | 486.09 | ON  | 447.29 |
| 6005 pSyMB | ?_SMB21480       | CDS | 1403327 | 1403634 - | 31 | 31 | NIL | 291.04 | NIL | 297.1  | NIL | 461.92 | NIL | 305.64 | ON  | 330.59 |
| 6006 pSyMB | ?_SMB21481       | CDS | 1403628 | 1404104 - | 30 | 30 | ON  | 359.93 | NIL | 303.65 | ON  | 403.48 | NIL | 330.81 | NIL | 401.26 |
| 6007 pSyMB | ?_SMB21482       | CDS | 1404401 | 1404703 - | 30 | 30 | ON  | 328.27 | NIL | 314.22 | NIL | 301.85 | NIL | 282.57 | NIL | 310.79 |
| 6008 pSyMB | ?_SMB21483       | CDS | 1404796 | 1405077 - | 30 | 30 | NIL | 244.63 | NIL | 315.95 | NIL | 271.5  | NIL | 283.41 | NIL | 283.6  |
| 6009 pSyMB | ?_SMB21484       | CDS | 1405094 | 1405279 - | 30 | 30 | NIL | 278.85 | NIL | 283.68 | NIL | 299.97 | NIL | 285.38 | NIL | 292.12 |
| 6010 pSyMB | fpes_SMB21484    | CDS | 1405318 | 1405839 + | 30 | 30 | NIL | 305.74 | ON  | 342.8  | NIL | 334.76 | NIL | 308.37 | NIL | 294.73 |
| 6011 pSyMB | ?_SMB21485       | CDS | 1405905 | 1406099 + | 30 | 30 | NIL | 238.52 | NIL | 291.68 | NIL | 234.96 | NIL | 221.68 | NIL | 265.76 |
| 6012 pSyMB | ?_SMB21486       | CDS | 1406242 | 1406682 + | 31 | 31 | NIL | 260.76 | NIL | 312.02 | NIL | 259.57 | NIL | 246.63 | NIL | 262.27 |
| 6013 pSyMB | ?_SMB21487       | CDS | 1406651 | 1407946 - | 30 | 30 | ON  | 353.62 | ON  | 430.13 | ON  | 381.47 | ON  | 489.73 | ON  | 390.37 |
| 6014 pSyMB | cpa_SMB21487     | CDS | 1408291 | 1409451 + | 30 | 30 | ON  | 646.48 | ON  | 353.37 | NIL | 379.33 | ON  | 379.82 | NIL | 342.97 |
| 6015 pSyMB | cpa_SMB21488     | CDS | 1409489 | 1411498 + | 30 | 30 | ON  | 608.03 | NIL | 305.1  | NIL | 269.93 | NIL | 283.94 | NIL | 364.26 |
| 6016 pSyMB | cpa_SMB21489     | CDS | 1411495 | 1412127 + | 30 | 30 | ON  | 504.51 | NIL | 308.35 | ON  | 308.35 | ON  | 337.29 | NIL | 320.14 |
| 6017 pSyMB | cpa_SMB21489     | CDS | 1412468 | 1412662 - | 30 | 30 | NIL | 262.03 | NIL | 254.76 | NIL | 293.77 | NIL | 251.44 | NIL | 303.59 |
| 6018 pSyMB | ?_SMB21490       | CDS | 1412661 | 1413416 + | 30 | 30 | NIL | 497.99 | ON  | 398.41 | NIL | 322.9  | ON  | 346.78 | NIL | 359.72 |
| 6019 pSyMB | ?_SMB21491       | CDS | 1413949 | 1413949 - | 30 | 30 | ON  | 377.25 | ON  | 389.08 | ON  | 410.78 | ON  | 394.95 | ON  | 359.72 |
| 6020 pSyMB | ?_SMB21492       | CDS | 1414210 | 1414872 - | 30 | 30 | ON  | 401.92 | ON  | 335.06 | NIL | 363.31 | ON  | 393.79 | ON  | 397.72 |
| 6021 pSyMB | ?_SMB21493       | CDS | 1414906 | 1415367 - | 30 | 30 | ON  | 352.97 | ON  | 372.37 | NIL | 311.88 | NIL | 330.38 | NIL | 323.5  |
| 6022 pSyMB | ocd_SMB21494     | CDS | 1415494 | 1416561 + | 30 | 30 | ON  | 392.06 | ON  | 319.75 | NIL | 361.74 | ON  | 344.33 | NIL | 355.73 |
| 6023 pSyMB | ?_SMB21495       | CDS | 1416596 | 1416778 - | 30 | 30 | ON  | 324.2  | ON  | 332.53 | ON  | 441.58 | ON  | 380.33 | NIL | 357.62 |
| 6024 pSyMB | ?_SMB21496       | CDS | 1417062 | 1417565 + | 30 | 30 | NIL | 270.31 | NIL | 309.08 | NIL | 284.04 | NIL | 298.12 | NIL | 299.73 |
| 6025 pSyMB | ?_SMB21497       | CDS | 1417562 | 1418203 + | 30 | 30 | NIL | 364.1  | ON  | 346.43 | ON  | 470.83 | ON  | 378.86 | ON  | 426.68 |
| 6026 pSyMB | acrf_SMB21497    | CDS | 1418498 | 1419619 + | 30 | 30 | ON  | 339.96 | ON  | 431.02 | ON  | 400.77 | ON  | 415.26 | ON  | 427.74 |
| 6027 pSyMB | acrf_SMB21498    | CDS | 1419623 | 1422856 + | 30 | 30 | ON  | 317.1  | ON  | 409.8  | NIL | 300.24 | NIL | 328.37 | NIL | 354.34 |
| 6028 pSyMB | ?_SMB21499       | CDS | 1422859 | 1425018 - | 31 | 31 | ON  | 324.07 | ON  | 338.17 | NIL | 325.42 | ON  | 320.49 | NIL | 331.76 |
| 6029 pSyMB | ?_SMB21500       | CDS | 1425015 | 1426058 - | 30 | 30 | ON  | 392.36 | ON  | 355.95 | NIL | 334.42 | ON  | 374.73 | NIL | 433.71 |
| 6030 pSyMB | ?_SMB21501       | CDS | 1426474 | 1426476 - | 30 | 30 | ON  | 355.8  | ON  | 353.45 | NIL | 451.14 | ON  | 459.36 | ON  | 433.71 |
| 6031 pSyMB | ?_SMB21502       | CDS | 1426474 | 1427642 - | 30 | 30 | ON  | 365.29 | ON  | 346.75 | NIL | 358.53 | ON  | 439.46 | NIL | 303.38 |
| 6032 pSyMB | ?_SMB21503       | CDS | 1427874 | 1429217 - | 30 | 30 | ON  | 440.03 | ON  | 407.72 | ON  | 379.06 | ON  | 457.6  | NIL | 403.34 |
| 6033 pSyMB | ?_SMB21504       | CDS | 1429228 | 1429983 - | 31 | 31 | ON  | 403.02 | ON  | 440.31 | ON  | 299.11 | ON  | 449.9  | ON  | 387.53 |
| 6034 pSyMB | wzy_SMB21505     | CDS | 1431307 | 1431307 - | 30 | 30 | ON  | 329.44 | ON  | 329.03 | NIL | 293.11 | NIL | 312.94 | NIL | 275.66 |
| 6035 pSyMB | ?_SMB21506       | CDS | 1432936 | 1432936 - | 30 | 30 | ON  | 420.21 | ON  | 410.36 | ON  | 429.57 | ON  | 533.67 | ON  | 429.57 |
| 6036 pSyMB | ?_SMB21507       | CDS | 1433139 | 1433796 + | 30 | 30 | NIL | 294.28 | NIL | 299.42 | NIL | 299.16 | NIL | 288.35 | NIL | 303.76 |
| 6037 pSyMB | dapa3_SMB21508   | CDS | 1433836 | 1434750 - | 30 | 30 | NIL | 313.14 | NIL | 309.56 | NIL | 290.56 | NIL | 280.35 | NIL | 329.45 |
| 6038 pSyMB | ?_SMB21509       | CDS | 1434924 | 1435436 + | 63 | 63 | NIL | 259.84 | NIL | 250.18 | NIL | 303.13 | NIL | 267.62 | NIL | 301.67 |

|      |       |                 |     |           |            |    |    |     |         |     |         |     |        |     |        |     |        |
|------|-------|-----------------|-----|-----------|------------|----|----|-----|---------|-----|---------|-----|--------|-----|--------|-----|--------|
| 6039 | psymb | ?_SMB21510      | CDS | 1435168   | 1435293 +  | 34 | 34 | NIL | 258.24  | NIL | 235.87  | NIL | 340.7  | NIL | 268.31 | NIL | 301.29 |
| 6040 | psymb | ?_SMB21511      | CDS | 1435537   | 1435529 +  | 30 | 30 | NIL | 304.31  | NIL | 323.52  | NIL | 307.87 | NIL | 301.22 | NIL | 325.78 |
| 6041 | psymb | ?_SMB21512      | CDS | 1436512   | 1436740 -  | 30 | 30 | NIL | 310.4   | NIL | 337.51  | NIL | 370.1  | NIL | 354.39 | NIL | 344.85 |
| 6042 | psymb | wz22_SMB21513   | CDS | 1436757   | 1438067 -  | 30 | 30 | NIL | 319.04  | NIL | 335.68  | NIL | 332.7  | NIL | 353.68 | NIL | 352.57 |
| 6043 | psymb | henrk2_SMB21514 | CDS | 1438191   | 1439018 +  | 30 | 30 | ON  | 440.28  | ON  | 468.44  | ON  | 437.25 | ON  | 460.2  | ON  | 359.86 |
| 6044 | psymb | ?_SMB21515      | CDS | 1439015   | 1440136 +  | 30 | 30 | ON  | 376.84  | ON  | 351.86  | NIL | 365.48 | ON  | 342.63 | NIL | 339.51 |
| 6045 | psymb | ?_SMB21516      | CDS | 1440390   | 1441121 -  | 30 | 30 | ON  | 399.7   | ON  | 349.44  | NIL | 355.03 | ON  | 351.17 | NIL | 366.87 |
| 6046 | psymb | ?_SMB21517      | CDS | 1441331   | 1442146 -  | 30 | 30 | NIL | 304.09  | NIL | 298.09  | NIL | 308.35 | ON  | 354.78 | NIL | 313.2  |
| 6047 | psymb | ?_SMB21518      | CDS | 1441331   | 1442146 -  | 30 | 30 | ON  | 322.62  | ON  | 330.1   | NIL | 356.39 | NIL | 337.28 | NIL | 309.9  |
| 6048 | psymb | ?_SMB21519      | CDS | 1442923   | 1444611 +  | 30 | 30 | ON  | 402.2   | ON  | 366.05  | ON  | 394.94 | ON  | 332.41 | NIL | 348.15 |
| 6049 | psymb | ?_SMB21520      | CDS | 1443139   | 1445267 +  | 31 | 31 | ON  | 330.93  | ON  | 349.85  | NIL | 337.94 | NIL | 332.59 | NIL | 307.43 |
| 6050 | psymb | ?_SMB21521      | CDS | 1446108   | 1445257    | 30 | 30 | ON  | 486.56  | ON  | 428.35  | NIL | 308.78 | ON  | 346.77 | NIL | 334.68 |
| 6051 | psymb | nmE_SMB21522    | CDS | 1446108   | 1445715 -  | 31 | 31 | ON  | 913.91  | ON  | 783.89  | ON  | 638.36 | ON  | 699    | ON  | 524.21 |
| 6052 | psymb | nmC_SMB21523    | CDS | 1446281   | 1447183 -  | 30 | 30 | ON  | 1056.15 | ON  | 578.06  | ON  | 664.75 | ON  | 500.93 | ON  | 492.03 |
| 6053 | psymb | nmC_SMB21524    | CDS | 1447381   | 1448030 -  | 30 | 30 | NIL | 733.01  | ON  | 1508.12 | ON  | 499.96 | ON  | 556.66 | ON  | 455.29 |
| 6054 | psymb | ?_SMB20647      | CDS | 1448927   | 1448578 -  | 30 | 30 | NIL | 233.27  | NIL | 288.12  | NIL | 348.96 | NIL | 277.52 | NIL | 268.77 |
| 6055 | psymb | ?_SMB20648      | CDS | 1490018   | 1450055 -  | 30 | 30 | ON  | 339.5   | NIL | 303.77  | NIL | 328.73 | ON  | 336.72 | NIL | 333.68 |
| 6056 | psymb | radet1_SMB20649 | CDS | 1450582   | 1451586 -  | 31 | 31 | ON  | 425.45  | ON  | 497.6   | ON  | 418.84 | ON  | 596.62 | ON  | 470.89 |
| 6057 | psymb | ?_SMB20650      | CDS | 1450582   | 1451586 -  | 30 | 30 | ON  | 496.51  | ON  | 541.28  | ON  | 458.66 | ON  | 543.74 | ON  | 450.86 |
| 6058 | psymb | ?_SMB20651      | CDS | 1451583   | 1453130 -  | 30 | 30 | ON  | 646.41  | ON  | 744.88  | ON  | 493.66 | ON  | 896.29 | ON  | 512.12 |
| 6059 | psymb | asnb_SMB20652   | CDS | 1453158   | 1453424 -  | 30 | 30 | ON  | 451.59  | ON  | 619.47  | ON  | 413.5  | ON  | 676.03 | ON  | 434.73 |
| 6060 | psymb | ?_SMB20654      | CDS | 1453451   | 1455388 -  | 30 | 30 | ON  | 320.98  | ON  | 357.32  | NIL | 334.97 | ON  | 340.74 | NIL | 352.81 |
| 6061 | psymb | ?_SMB20654      | CDS | 1455985   | 1456380 +  | 30 | 30 | ON  | 334.53  | NIL | 308.94  | ON  | 380.02 | NIL | 358.72 | NIL | 340.23 |
| 6062 | psymb | ?_SMB20655      | CDS | 1456721   | 1457050 +  | 30 | 30 | ON  | 310.92  | NIL | 308.94  | ON  | 349.17 | NIL | 335.95 | NIL | 318.5  |
| 6063 | psymb | ?_SMB20657      | CDS | 1458229   | 1458885 +  | 30 | 30 | NIL | 301.36  | NIL | 293.55  | NIL | 281.56 | NIL | 298.21 | NIL | 323.02 |
| 6064 | psymb | ?_SMB20658      | CDS | 1458893   | 1459792 -  | 30 | 30 | NIL | 277.26  | NIL | 306.32  | NIL | 300.15 | NIL | 304.29 | NIL | 306.65 |
| 6065 | psymb | ?_SMB20659      | CDS | 1459807   | 1460739 -  | 30 | 30 | NIL | 303.86  | ON  | 320.03  | NIL | 288.94 | NIL | 293.13 | NIL | 312.51 |
| 6066 | psymb | ?_SMB20660      | CDS | 1460932   | 1462236 -  | 30 | 30 | ON  | 340.39  | ON  | 415.37  | ON  | 399.46 | ON  | 469.14 | NIL | 341.52 |
| 6067 | psymb | ?_SMB20661      | CDS | 1462371   | 1463438 -  | 30 | 30 | NIL | 307.45  | NIL | 300.65  | NIL | 368.42 | ON  | 350.96 | NIL | 349.76 |
| 6068 | psymb | ?_SMB20662      | CDS | 1463523   | 1464299 -  | 30 | 30 | NIL | 283.62  | NIL | 282.67  | NIL | 289.84 | NIL | 285.59 | NIL | 276.15 |
| 6069 | psymb | ?_SMB20663      | CDS | 1464301   | 1465284 -  | 30 | 30 | ON  | 349.24  | ON  | 391.21  | ON  | 441.39 | NIL | 408.36 | ON  | 371.35 |
| 6070 | psymb | ?_SMB20664      | CDS | 1465403   | 1466092 -  | 30 | 30 | NIL | 287.07  | NIL | 298.03  | NIL | 317.22 | NIL | 298.03 | NIL | 312.22 |
| 6071 | psymb | ?_SMB20665      | CDS | 1466169   | 1466822 -  | 40 | 10 | NIL | 361.85  | ON  | 388.02  | ON  | 349.07 | NIL | 345.48 | NIL | 331.5  |
| 6072 | psymb | ?_SMB20666      | CDS | 1467106   | 1467783 -  | 30 | 30 | ON  | 332.23  | ON  | 406.95  | NIL | 289.05 | ON  | 341.78 | NIL | 325.87 |
| 6073 | psymb | ?_SMB20667      | CDS | 1467800   | 1468804 -  | 30 | 30 | ON  | 329.86  | NIL | 331.32  | NIL | 353.72 | NIL | 315.74 | NIL | 329.53 |
| 6074 | psymb | ?_SMB20668      | CDS | 1469832 + | 1469832 +  | 30 | 30 | ON  | 379.04  | ON  | 337.21  | NIL | 359.07 | NIL | 374.02 | ON  | 315.48 |
| 6075 | psymb | ?_SMB20669      | CDS | 1469844   | 1470649 +  | 30 | 30 | ON  | 344.35  | ON  | 335.99  | NIL | 336.92 | NIL | 329.53 | NIL | 316.75 |
| 6076 | psymb | ?_SMB20670      | CDS | 1470644   | 1471921 +  | 30 | 30 | ON  | 407.74  | ON  | 343.81  | ON  | 381.7  | ON  | 360.79 | NIL | 317.61 |
| 6077 | psymb | ?_SMB20671      | CDS | 1472038   | 1473006 -  | 30 | 30 | ON  | 320.01  | ON  | 334.18  | ON  | 438.09 | ON  | 341.14 | NIL | 348.47 |
| 6078 | psymb | ?_SMB20672      | CDS | 1473003   | 14743025 - | 30 | 30 | NIL | 299.16  | NIL | 300.62  | NIL | 283.92 | NIL | 292.88 | NIL | 328.19 |
| 6079 | psymb | ?_SMB20673      | CDS | 1474322   | 1475902 -  | 30 | 30 | ON  | 311.19  | NIL | 328.8   | NIL | 361.07 | ON  | 349.26 | NIL | 360.57 |
| 6080 | psymb | ?_SMB20674      | CDS | 1476114   | 1477133 +  | 30 | 30 | ON  | 351.97  | ON  | 334.53  | NIL | 354.1  | ON  | 365.48 | ON  | 405.55 |
| 6081 | psymb | ?_SMB20675      | CDS | 1477166   | 1477741 -  | 30 | 30 | ON  | 353.74  | ON  | 366.69  | NIL | 352.86 | ON  | 342.37 | NIL | 348    |
| 6082 | psymb | ?_SMB20676      | CDS | 1477667   | 1478687 -  | 30 | 30 | NIL | 299.75  | ON  | 325.83  | NIL | 334.91 | NIL | 315.53 | NIL | 342.69 |
| 6083 | psymb | ?_SMB20677      | CDS | 1478186   | 1479277 -  | 30 | 30 | NIL | 284.01  | NIL | 319.61  | NIL | 290.37 | NIL | 266.92 | NIL | 301.88 |
| 6084 | psymb | tuD2_SMB20678   | CDS | 1479325   | 1480593 -  | 30 | 28 | ON  | 324.75  | ON  | 328.67  | ON  | 413.19 | ON  | 368.76 | NIL | 348.22 |
| 6085 | psymb | glxR_SMB20679   | CDS | 1480708   | 1481592 -  | 30 | 30 | ON  | 312.89  | NIL | 307.84  | NIL | 345.03 | ON  | 349.51 | NIL | 322.91 |
| 6086 | psymb | hyI_SMB20680    | CDS | 1481598   | 1482413 -  | 30 | 30 | ON  | 314.35  | ON  | 342.73  | NIL | 362.45 | ON  | 346.23 | NIL | 344.37 |
| 6087 | psymb | gcl_SMB20681    | CDS | 1482468   | 1484252 -  | 30 | 30 | ON  | 306.17  | ON  | 327.25  | NIL | 375.34 | ON  | 310.48 | NIL | 323.97 |
| 6088 | psymb | icR_SMB20682    | CDS | 1484422   | 1485243 +  | 30 | 30 | ON  | 417.32  | ON  | 349.89  | NIL | 375.34 | ON  | 384.96 | ON  | 393.24 |
| 6089 | psymb | ?_SMB20683      | CDS | 1485370   | 1486269 +  | 30 | 30 | ON  | 384.82  | ON  | 344.55  | ON  | 407.32 | ON  | 379.81 | ON  | 372.74 |
| 6090 | psymb | ?_SMB20684      | CDS | 1486404   | 1487240 +  | 30 | 30 | ON  | 374.71  | ON  | 364.94  | ON  | 397.32 | NIL | 328.47 | NIL | 363.03 |
| 6091 | psymb | ?_SMB20685      | CDS | 1487278   | 1489734 +  | 30 | 30 | ON  | 362.8   | ON  | 382.48  | ON  | 374.29 | ON  | 425.44 | ON  | 434.47 |
| 6092 | psymb | ?_SMB20686      | CDS | 1489827   | 1490711 +  | 30 | 30 | ON  | 401.39  | ON  | 532.41  | ON  | 416.86 | ON  | 543.21 | ON  | 377.03 |
| 6093 | psymb | ?_SMB20687      | CDS | 1490711   | 1491796 +  | 30 | 30 | ON  | 331.84  | NIL | 306.39  | NIL | 332.95 | ON  | 364.85 | NIL | 308.16 |
| 6094 | psymb | ?_SMB20688      | CDS | 1491798   | 1492439 +  | 30 | 30 | ON  | 341.97  | ON  | 384.89  | NIL | 344.77 | ON  | 362.6  | NIL | 376.7  |
| 6095 | psymb | xH44_SMB20689   | CDS | 1492447   | 1493220 +  | 31 | 31 | ON  | 364.61  | ON  | 329.08  | NIL | 348.33 | NIL | 327.91 | NIL | 338.04 |
| 6096 | psymb | ?_SMB20690      | CDS | 1493217   | 1493543 -  | 30 | 30 | ON  | 326.11  | NIL | 292.09  | NIL | 309.87 | NIL | 325.68 | NIL | 375.3  |
| 6097 | psymb | ?_SMB20691      | CDS | 1493595   | 1494932 -  | 30 | 30 | NIL | 223.88  | NIL | 240.38  | NIL | 232.65 | NIL | 238.79 | NIL | 265.51 |
| 6098 | psymb | knO1_1_SMB20692 | CDS | 1494126   | 1494932 -  | 30 | 30 | NIL | 337.66  | NIL | 317.86  | NIL | 349.16 | ON  | 351.32 | NIL | 364.53 |
| 6099 | psymb | ?_SMB20693      | CDS | 1495065   | 1495361 -  | 30 | 30 | NIL | 311.96  | NIL | 324.23  | ON  | 337.33 | ON  | 343.52 | NIL | 337.91 |
| 6100 | psymb | ?_SMB20694      | CDS | 1495684   | 1495684 +  | 30 | 30 | ON  | 353.89  | ON  | 363.52  | NIL | 370.59 | ON  | 354.62 | NIL | 363.45 |
| 6101 | psymb | ?_SMB20695      | CDS | 1495765   | 1496271 -  | 30 | 30 | ON  | 371.27  | ON  | 429.14  | ON  | 382.06 | ON  | 398.22 | NIL | 363.67 |
| 6102 | psymb | ?_SMB20696      | CDS | 1496268   | 1496753 -  | 30 | 30 | ON  | 546.22  | ON  | 744.73  | ON  | 449.23 | ON  | 556.66 | ON  | 460.01 |
| 6103 | psymb | ?_SMB20697      | CDS | 1496855   | 149849 -   | 30 | 30 | ON  | 343.08  | ON  | 403.9   | NIL | 375.67 | ON  | 344.02 | NIL | 374    |
| 6104 | psymb | ?_SMB20698      | CDS | 1498701   | 1500353 -  | 31 | 31 | ON  | 418.14  | ON  | 402.9   | NIL | 362.5  | ON  | 439.16 | NIL | 369.29 |
| 6105 | psymb | ?_SMB20699      | CDS | 1500350   | 1501447 -  | 30 | 30 | NIL | 335.88  | NIL | 321.92  | ON  | 410.69 | ON  | 386.37 | ON  | 421.77 |
| 6106 | psymb | ?_SMB20700      | CDS | 1501534   | 1501947 -  | 30 | 30 | NIL | 286.94  | NIL | 280.13  | NIL | 327.33 | NIL | 317.16 | ON  | 346.8  |
| 6107 | psymb | ?_SMB20701      | CDS | 1502024   | 1502776 -  | 30 | 30 | NIL | 302.2   | ON  | 346.33  | ON  | 650.82 | ON  | 485.81 | ON  | 505.34 |
| 6108 | psymb | ?_SMB20702      | CDS | 1502959   | 1504623 +  | 30 | 30 | NIL | 355.52  | ON  | 336.6   | NIL | 373.36 | ON  | 337.84 | NIL | 327.38 |
| 6109 | psymb | ?_SMB20703      | CDS | 1504675   | 1505184 -  | 30 | 30 | NIL | 304.84  | ON  | 325.97  | ON  | 395.94 | NIL | 330.01 | NIL | 318.2  |
| 6110 | psymb | giga2_SMB20704  | CDS | 1505461   | 1506921 +  | 30 | 30 | NIL | 302.88  | NIL | 282.18  | NIL | 309.32 | NIL | 293    | NIL | 317.82 |

|            |                     |     |          |           |    |    |     |         |     |         |     |        |     |         |     |        |
|------------|---------------------|-----|----------|-----------|----|----|-----|---------|-----|---------|-----|--------|-----|---------|-----|--------|
| 6111 pSymB | ?_SMB20705          | CDS | 1507236  | 1508147 + | 30 | 30 | ON  | 523.8   | ON  | 411.9   | ON  | 418.72 | ON  | 460.36  | ON  | 438.51 |
| 6112 pSymB | ?_SMB20706          | CDS | 1508281  | 1509057 + | 30 | 30 | ON  | 350.22  | ON  | 345.4   | NIL | 315.66 | ON  | 402.56  | NIL | 305.74 |
| 6113 pSymB | chrG2_SMB20707      | CDS | 1509109  | 1510371 - | 30 | 30 | NIL | 309.95  | ON  | 351.25  | NIL | 339.97 | NIL | 304.01  | NIL | 334    |
| 6114 pSymB | ?_SMB20708          | CDS | 1510373  | 1510924 - | 30 | 30 | ON  | 374.84  | ON  | 417.64  | ON  | 422.55 | ON  | 429.59  | NIL | 357.8  |
| 6115 pSymB | ?_SMB20709          | CDS | 1511135  | 1511692 + | 30 | 30 | ON  | 365.29  | ON  | 363.16  | ON  | 466.46 | ON  | 362.88  | NIL | 365    |
| 6116 pSymB | ?_SMB20710          | CDS | 1512188  | 1513075 + | 30 | 30 | ON  | 390.29  | ON  | 353.27  | ON  | 379.51 | ON  | 447.27  | NIL | 382.83 |
| 6117 pSymB | ?_SMB20711          | CDS | 1513278  | 1514090 + | 30 | 30 | ON  | 314.15  | NIL | 296.28  | NIL | 320.68 | NIL | 296.52  | NIL | 328.36 |
| 6118 pSymB | moB_SMB20712        | CDS | 1514330  | 1515259 + | 30 | 30 | ON  | 561.12  | ON  | 316.98  | NIL | 319.12 | NIL | 290.98  | NIL | 299.02 |
| 6119 pSymB | ?_SMB20713          | CDS | 1515467  | 1516987 + | 30 | 30 | ON  | 409.15  | NIL | 314.64  | NIL | 354.37 | NIL | 290.98  | NIL | 319.43 |
| 6120 pSymB | ?_SMB20714          | CDS | 1517084  | 1518109 + | 30 | 30 | ON  | 352.33  | NIL | 309.32  | NIL | 302.04 | NIL | 279.62  | NIL | 306.37 |
| 6121 pSymB | ?_SMB20715          | CDS | 1518496  | 1519401 - | 30 | 30 | NIL | 306.04  | NIL | 297.83  | NIL | 312.69 | NIL | 299.04  | NIL | 327.47 |
| 6122 pSymB | ?_SMB20716          | CDS | 1519556  | 1520452 + | 30 | 30 | NIL | 305     | NIL | 326.46  | NIL | 345.86 | NIL | 381.59  | NIL | 314.27 |
| 6123 pSymB | ?_SMB20717          | CDS | 1520541  | 1521566 - | 30 | 30 | ON  | 320.24  | NIL | 297.04  | ON  | 325.02 | NIL | 316.14  | NIL | 323.01 |
| 6124 pSymB | ?_SMB20718          | CDS | 1521833  | 1523359 + | 30 | 30 | NIL | 319.09  | ON  | 440.57  | NIL | 247.78 | NIL | 325.02  | NIL | 297.57 |
| 6125 pSymB | ?_SMB20719          | CDS | 1523477  | 1524437 + | 30 | 30 | NIL | 263.94  | ON  | 825.84  | NIL | 320.25 | ON  | 406.95  | NIL | 289    |
| 6126 pSymB | ?_SMB20720          | CDS | 1525473  | 1525463 + | 30 | 30 | ON  | 335.17  | ON  | 345.05  | NIL | 339.7  | NIL | 326.49  | NIL | 345.82 |
| 6127 pSymB | ?_SMB20721          | CDS | 1525774  | 1527171 - | 30 | 30 | ON  | 338.8   | ON  | 317.08  | NIL | 315.75 | NIL | 380.67  | NIL | 305.81 |
| 6128 pSymB | ?_SMB20722          | CDS | 1527168  | 1527845 - | 30 | 30 | NIL | 300.39  | NIL | 357.98  | ON  | 438.27 | ON  | 380.67  | NIL | 333.04 |
| 6129 pSymB | ?_SMB20723          | CDS | 1527923  | 1528990 + | 30 | 30 | ON  | 337.78  | ON  | 358.66  | ON  | 520.93 | ON  | 1656.4  | NIL | 526.03 |
| 6130 pSymB | ?_SMB20724          | CDS | 1529225  | 1530169 + | 30 | 30 | ON  | 371.98  | ON  | 804.23  | ON  | 281.57 | ON  | 631.51  | NIL | 354.84 |
| 6131 pSymB | ?_SMB20725          | CDS | 1530657  | 1530657 + | 30 | 30 | ON  | 335.53  | ON  | 436.22  | NIL | 360.48 | ON  | 423.12  | ON  | 391.26 |
| 6132 pSymB | ?_SMB20726          | CDS | 1530777  | 1532294 + | 30 | 30 | ON  | 337.78  | ON  | 390.79  | ON  | 380.18 | ON  | 616.65  | ON  | 599.93 |
| 6133 pSymB | ?_SMB20727          | CDS | 1532369  | 1532602 + | 30 | 30 | ON  | 547.19  | ON  | 1680.44 | ON  | 625.67 | ON  | 495.08  | ON  | 497.58 |
| 6134 pSymB | ?_SMB20728          | CDS | 1532685  | 1532894 - | 30 | 30 | NIL | 341.09  | ON  | 369.32  | ON  | 625.67 | ON  | 495.08  | NIL | 539.12 |
| 6135 pSymB | ?_SMB20729          | CDS | 1533003  | 1533416 - | 30 | 30 | NIL | 297.6   | ON  | 325.16  | ON  | 384.64 | ON  | 450.08  | ON  | 501.15 |
| 6136 pSymB | glnI1_SMB20745      | CDS | 15334910 | 1534910 - | 30 | 30 | NIL | 499.28  | ON  | 429.9   | ON  | 301.27 | ON  | 338.59  | NIL | 342.87 |
| 6137 pSymB | ?_SMB20746          | CDS | 1535474  | 1535659 + | 30 | 30 | NIL | 305.96  | NIL | 333.93  | NIL | 380.66 | ON  | 356.16  | NIL | 368    |
| 6138 pSymB | ?_SMB20747          | CDS | 1535679  | 1536453 - | 30 | 30 | NIL | 305.45  | NIL | 317.56  | ON  | 492.52 | ON  | 415.96  | NIL | 360.44 |
| 6139 pSymB | psf_SMB20748        | CDS | 1536505  | 1537569 - | 30 | 30 | ON  | 369.05  | ON  | 409.62  | ON  | 410.7  | ON  | 423.96  | NIL | 352.22 |
| 6140 pSymB | uxbB_SMB20749       | CDS | 1538076  | 1539393 + | 30 | 30 | NIL | 443.78  | ON  | 312.18  | NIL | 426.75 | ON  | 445.59  | ON  | 402.84 |
| 6141 pSymB | ?_SMB20750          | CDS | 1539559  | 1540308 + | 30 | 30 | NIL | 279.6   | NIL | 407.12  | ON  | 343.74 | ON  | 445.59  | ON  | 353.59 |
| 6142 pSymB | ?_SMB20751          | CDS | 1540339  | 1541235 - | 30 | 30 | ON  | 407.12  | ON  | 411.31  | NIL | 342.68 | ON  | 403.05  | NIL | 338.95 |
| 6143 pSymB | ?_SMB20752          | CDS | 1541282  | 1542352 - | 30 | 30 | ON  | 433     | ON  | 352.89  | NIL | 332.67 | ON  | 328.95  | NIL | 336.69 |
| 6144 pSymB | ?_SMB20753          | CDS | 1542365  | 1543507 - | 30 | 30 | ON  | 331.93  | NIL | 312.51  | NIL | 357.63 | NIL | 322.34  | NIL | 332.94 |
| 6145 pSymB | ?_SMB20754          | CDS | 1543624  | 1545099 - | 30 | 30 | ON  | 341.29  | NIL | 309.19  | NIL | 340.83 | ON  | 354.16  | NIL | 333.21 |
| 6146 pSymB | pccB_SMB20755       | CDS | 1545196  | 1546728 + | 30 | 30 | ON  | 393.86  | ON  | 368.45  | NIL | 351.08 | ON  | 380.97  | NIL | 322.78 |
| 6147 pSymB | pccA_SMB20756       | CDS | 1546741  | 1548753 + | 30 | 30 | ON  | 327.77  | ON  | 363.17  | NIL | 312.24 | ON  | 350.34  | NIL | 304.51 |
| 6148 pSymB | bhA_SMB20757        | CDS | 1548979  | 1551117 + | 30 | 30 | NIL | 309.19  | NIL | 313.13  | NIL | 336.13 | NIL | 322.89  | NIL | 300.53 |
| 6149 pSymB | ?_SMB20758          | CDS | 1551129  | 1551860 - | 30 | 30 | NIL | 305.92  | NIL | 305.45  | NIL | 352.2  | ON  | 376.61  | NIL | 328.96 |
| 6150 pSymB | pHnG_SMB20759       | CDS | 1551986  | 1552056 + | 30 | 30 | NIL | 305.92  | NIL | 367.54  | NIL | 352.2  | ON  | 376.61  | NIL | 328.96 |
| 6151 pSymB | pHnH_SMB20760       | CDS | 1552056  | 1552059 + | 30 | 30 | ON  | 336.59  | ON  | 337.77  | NIL | 319.74 | ON  | 382.99  | NIL | 357.86 |
| 6152 pSymB | pHnI_SMB20761       | CDS | 1553063  | 1554169 + | 30 | 30 | ON  | 344.02  | ON  | 337.77  | NIL | 319.74 | ON  | 382.99  | NIL | 357.86 |
| 6153 pSymB | pHnJ_SMB20762       | CDS | 1554166  | 1555059 + | 30 | 30 | ON  | 335.88  | ON  | 336.13  | NIL | 335.92 | ON  | 345.8   | NIL | 352.4  |
| 6154 pSymB | pHnK_SMB20763       | CDS | 1555056  | 1555832 + | 30 | 30 | ON  | 332.97  | ON  | 332.97  | NIL | 276.81 | NIL | 292.9   | NIL | 317.74 |
| 6155 pSymB | pHnL_SMB20764       | CDS | 1555866  | 1556573 + | 30 | 30 | NIL | 280.12  | NIL | 255.13  | NIL | 304.64 | NIL | 306.49  | NIL | 298.12 |
| 6156 pSymB | ?_SMB20765          | CDS | 1556570  | 1557184 + | 30 | 30 | ON  | 343.1   | ON  | 377.21  | NIL | 350.36 | NIL | 324.4   | NIL | 366.64 |
| 6157 pSymB | Trm22-9_SMB20766    | CDS | 1557312  | 1558475 - | 43 | 1  | ON  | 459.79  | ON  | 423.01  | ON  | 441.11 | ON  | 384.75  | ON  | 332.06 |
| 6158 pSymB | dak_SMB20767        | CDS | 1558643  | 1560361 - | 30 | 30 | NIL | 410.6   | ON  | 369.47  | ON  | 404.21 | ON  | 384.75  | ON  | 393.63 |
| 6159 pSymB | ?_SMB20768          | CDS | 1560378  | 1561319 - | 30 | 30 | NIL | 310.9   | NIL | 305.88  | NIL | 326.95 | NIL | 395.97  | NIL | 303.08 |
| 6160 pSymB | ?_SMB20769          | CDS | 1561373  | 1562911 - | 30 | 30 | ON  | 350.39  | ON  | 391.17  | NIL | 368.6  | ON  | 349.75  | ON  | 357.64 |
| 6161 pSymB | ?_SMB20770          | CDS | 1562946  | 1564346 - | 30 | 30 | ON  | 357.99  | ON  | 353.55  | ON  | 394.49 | ON  | 349.75  | ON  | 425.11 |
| 6162 pSymB | ?_SMB20771          | CDS | 1563552  | 1564538 - | 30 | 30 | ON  | 340.73  | ON  | 337.41  | NIL | 339.52 | ON  | 356.96  | NIL | 338.02 |
| 6163 pSymB | pHvA2-1_SMB20772    | CDS | 1565614  | 1565640 - | 30 | 30 | ON  | 319.29  | NIL | 301.66  | NIL | 338.7  | NIL | 310.56  | NIL | 435.01 |
| 6164 pSymB | ?_SMB20773          | CDS | 1565858  | 1566544 + | 30 | 30 | ON  | 370.04  | ON  | 361.5   | ON  | 423.14 | ON  | 392.75  | ON  | 485.83 |
| 6165 pSymB | ?_SMB20774          | CDS | 1566609  | 1567154 - | 30 | 30 | NIL | 285.3   | ON  | 383.84  | NIL | 267.26 | NIL | 281.03  | ON  | 416.8  |
| 6166 pSymB | ?_SMB20775          | CDS | 1567285  | 1567887 + | 30 | 30 | ON  | 420.31  | ON  | 360.05  | NIL | 372.25 | ON  | 351.72  | NIL | 362.25 |
| 6167 pSymB | cyA_SMB20776        | CDS | 1567887  | 1572836 + | 30 | 30 | ON  | 366.99  | ON  | 397.82  | NIL | 362.84 | ON  | 391.53  | NIL | 361.59 |
| 6168 pSymB | Trm191-2_SMB20777   | CDS | 1570366  | 1574031 + | 70 | 0  | ON  | 378.6   | ON  | 316.94  | NIL | 290.55 | ON  | 341.38  | NIL | 299.92 |
| 6169 pSymB | Trm20112b2_SMB20778 | CDS | 1574031  | 1574614 - | 51 | 0  | ON  | 368.9   | ON  | 325.47  | NIL | 339.51 | ON  | 349.37  | ON  | 317.16 |
| 6170 pSymB | ?_SMB20779          | CDS | 1574366  | 1574617 + | 30 | 0  | ON  | 407.3   | ON  | 424.31  | NIL | 309.18 | ON  | 507.99  | ON  | 377.13 |
| 6171 pSymB | ?_SMB20780          | CDS | 1574695  | 1575954 - | 33 | 0  | ON  | 421.91  | ON  | 301.64  | NIL | 340.67 | ON  | 301.71  | NIL | 308.86 |
| 6172 pSymB | ?_SMB20781          | CDS | 1576499  | 1576615 - | 34 | 0  | ON  | 1500.06 | ON  | 839.72  | ON  | 655.23 | ON  | 671.51  | ON  | 669.2  |
| 6173 pSymB | Trm20112b1_SMB21702 | CDS | 1576502  | 1576621 + | 41 | 0  | ON  | 753.07  | ON  | 857.94  | ON  | 600.19 | ON  | 642.81  | ON  | 599.7  |
| 6174 pSymB | ?_SMB21701          | CDS | 1576954  | 1577845 - | 32 | 32 | NIL | 967.09  | ON  | 511.59  | ON  | 476.16 | ON  | 653.14  | ON  | 465.21 |
| 6175 pSymB | Trm20112a_SMB20783  | CDS | 1577129  | 1577845 - | 30 | 30 | NIL | 298.95  | NIL | 312.39  | NIL | 321.55 | NIL | 346.66  | NIL | 321.55 |
| 6176 pSymB | ?_SMB20784          | CDS | 1577826  | 1577890 - | 30 | 30 | NIL | 311.19  | NIL | 285.86  | NIL | 304.07 | ON  | 341.17  | NIL | 303.76 |
| 6177 pSymB | ?_SMB20785          | CDS | 1578587  | 1579588 - | 30 | 30 | NIL | 310.68  | ON  | 322.62  | NIL | 295.1  | ON  | 542.06  | NIL | 344.57 |
| 6178 pSymB | ?_SMB20786          | CDS | 1579595  | 1580458 - | 30 | 30 | ON  | 336.48  | ON  | 336.58  | NIL | 329.97 | ON  | 547.83  | ON  | 379.4  |
| 6179 pSymB | ?_SMB20787          | CDS | 1580458  | 1581771 - | 30 | 30 | ON  | 356.31  | ON  | 379.37  | ON  | 388.53 | ON  | 1208.97 | ON  | 524.05 |
| 6180 pSymB | ?_SMB20568          | CDS | 1581911  | 1582681 - | 30 | 30 | NIL | 350.47  | NIL | 299.37  | NIL | 351.55 | NIL | 298.67  | NIL | 303.15 |
| 6181 pSymB | ?_SMB20570          | CDS | 1582692  | 1583626 - | 30 | 30 | ON  | 356.11  | ON  | 358.31  | ON  | 403.24 | ON  | 365.62  | ON  | 405.42 |
| 6182 pSymB | ?_SMB20571          | CDS | 1583781  | 1584626 - | 30 | 30 | ON  | 440.3   | ON  | 483.87  | ON  | 372.53 | ON  | 407.65  | NIL | 342.62 |

|            |                   |     |          |         |   |    |    |     |        |     |         |     |         |     |        |     |        |
|------------|-------------------|-----|----------|---------|---|----|----|-----|--------|-----|---------|-----|---------|-----|--------|-----|--------|
| 6183 pSyMB | 2. SMB21691       | CDS | 1584643  | 1585992 | - | 30 | 30 | NIL | 277.09 | NIL | 313.94  | NIL | 305.71  | NIL | 299.87 | NIL | 323.49 |
| 6184 pSyMB | 2. SMB20573       | CDS | 1586081  | 1586982 | - | 30 | 30 | NIL | 333.95 | NIL | 335.47  | NIL | 358.68  | ON  | 351.47 | NIL | 355.72 |
| 6185 pSyMB | 2. SMB20574       | CDS | 1586419  | 1589446 | + | 30 | 30 | ON  | 332.02 | ON  | 326.43  | NIL | 357.73  | ON  | 373.16 | NIL | 332.93 |
| 6186 pSyMB | pcab: SMB20575    | CDS | 1589460  | 1590515 | - | 30 | 30 | ON  | 361.41 | ON  | 378.94  | ON  | 401.43  | ON  | 417.82 | NIL | 361.96 |
| 6188 pSyMB | pcag: SMB20576    | CDS | 1590398  | 1591212 | - | 30 | 30 | ON  | 330.04 | ON  | 369.23  | NIL | 352.25  | ON  | 576.15 | ON  | 405.55 |
| 6189 pSyMB | pcag: SMB20578    | CDS | 1591984  | 1591984 | - | 30 | 30 | ON  | 310.28 | ON  | 334.67  | ON  | 449.74  | ON  | 649.76 | ON  | 482.67 |
| 6190 pSyMB | pcad: SMB20580    | CDS | 1592001  | 1592408 | - | 31 | 31 | ON  | 327.16 | ON  | 356.43  | NIL | 341.82  | ON  | 434.84 | ON  | 413.38 |
| 6191 pSyMB | pcad: SMB20580    | CDS | 1592405  | 1593211 | + | 30 | 30 | ON  | 315.9  | ON  | 323.18  | ON  | 332     | ON  | 544.11 | ON  | 449.01 |
| 6192 pSyMB | 2. SMB20581       | CDS | 1593247  | 1593247 | - | 30 | 30 | ON  | 330.35 | ON  | 305.87  | ON  | 325.28  | ON  | 319.46 | ON  | 325.8  |
| 6193 pSyMB | 2. SMB20582       | CDS | 1594321  | 1594321 | - | 30 | 30 | ON  | 348.16 | ON  | 375.53  | NIL | 361.37  | NIL | 348.41 | NIL | 350.47 |
| 6194 pSyMB | pcba: SMB20583    | CDS | 1596355  | 1596355 | - | 30 | 30 | ON  | 335.3  | ON  | 381.65  | NIL | 345.74  | NIL | 316.07 | NIL | 326.35 |
| 6195 pSyMB | 2. SMB20584       | CDS | 1597367  | 1597367 | - | 30 | 30 | ON  | 352.47 | ON  | 354.34  | ON  | 317.03  | ON  | 333.37 | ON  | 292.72 |
| 6196 pSyMB | 2. SMB20584       | CDS | 1598655  | 1598655 | - | 30 | 30 | ON  | 330.51 | ON  | 324.94  | ON  | 359.61  | ON  | 356.13 | NIL | 363.08 |
| 6197 pSyMB | gpt: SMB20586     | CDS | 1599884  | 1599884 | + | 30 | 30 | ON  | 331.82 | ON  | 347     | NIL | 351.21  | ON  | 407.79 | NIL | 365.28 |
| 6198 pSyMB | 2. SMB20586       | CDS | 1601452  | 1602207 | - | 30 | 30 | ON  | 279.19 | ON  | 297.17  | ON  | 355.59  | ON  | 337.81 | NIL | 333.33 |
| 6199 pSyMB | 2. SMB20587       | CDS | 1602338  | 1603189 | + | 30 | 30 | ON  | 330.89 | ON  | 322.47  | ON  | 443.87  | ON  | 832.12 | ON  | 526.55 |
| 6200 pSyMB | pcaf: SMB20589    | CDS | 1603212  | 1603997 | + | 30 | 30 | NIL | 312.86 | NIL | 313.61  | NIL | 308.82  | ON  | 906.81 | ON  | 609.22 |
| 6201 pSyMB | 2. SMB20590       | CDS | 1603997  | 1605199 | + | 30 | 30 | ON  | 366.13 | ON  | 359.71  | ON  | 463.17  | ON  | 663.59 | ON  | 462.46 |
| 6202 pSyMB | 2. SMB20590       | CDS | 1605382  | 1605705 | - | 30 | 30 | NIL | 338.8  | ON  | 355.49  | ON  | 477.47  | ON  | 515.49 | ON  | 460.4  |
| 6203 pSyMB | 2. SMB20592       | CDS | 1605767  | 1606063 | - | 30 | 30 | NIL | 196.9  | NIL | 216.08  | NIL | 213.34  | NIL | 199.38 | NIL | 262.48 |
| 6204 pSyMB | pcp: SMB20592     | CDS | 1606089  | 1606712 | + | 30 | 30 | ON  | 303.17 | ON  | 298.61  | ON  | 312.25  | ON  | 313.51 | ON  | 301.71 |
| 6205 pSyMB | 2. SMB20593       | CDS | 1606851  | 1607375 | + | 30 | 30 | ON  | 316.82 | NIL | 303.46  | ON  | 377.3   | ON  | 351.42 | NIL | 312.84 |
| 6206 pSyMB | ameY: SMB20594    | CDS | 1607384  | 1607701 | + | 30 | 30 | NIL | 283.81 | NIL | 273.7   | NIL | 303.64  | NIL | 299.09 | ON  | 363.36 |
| 6207 pSyMB | fsk2: SMB20595    | CDS | 1607754  | 1609589 | - | 31 | 28 | NIL | 665.79 | ON  | 477.99  | ON  | 492.77  | ON  | 546.36 | ON  | 434.18 |
| 6208 pSyMB | 2. SMB20596       | CDS | 1609604  | 1610593 | - | 30 | 30 | ON  | 538.55 | ON  | 434.08  | NIL | 278.35  | ON  | 466.5  | ON  | 378.27 |
| 6209 pSyMB | 2. SMB20597       | CDS | 1610921  | 161340  | + | 30 | 30 | ON  | 317.43 | ON  | 375.58  | NIL | 278.35  | NIL | 310.44 | NIL | 344.64 |
| 6210 pSyMB | repA3: SMB20598   | CDS | 1611496  | 1612752 | + | 30 | 30 | ON  | 396.72 | ON  | 344.28  | ON  | 382.39  | ON  | 371.06 | NIL | 334.23 |
| 6211 pSyMB | 2. SMB20600       | CDS | 1612880  | 1613817 | + | 30 | 30 | ON  | 491.74 | ON  | 724.91  | ON  | 409.61  | ON  | 514.89 | NIL | 348.36 |
| 6212 pSyMB | 2. SMB21707       | CDS | 1614675  | 1614503 | - | 30 | 30 | NIL | 294.42 | NIL | 305.56  | NIL | 288.81  | NIL | 310.91 | NIL | 357.6  |
| 6213 pSyMB | 2. SMB20602       | CDS | 1614675  | 1615370 | - | 30 | 30 | NIL | 314.72 | NIL | 305.56  | NIL | 306.58  | NIL | 297.39 | NIL | 318.09 |
| 6214 pSyMB | 2. SMB20603       | CDS | 1616141  | 1616141 | - | 30 | 30 | ON  | 303.2  | NIL | 310.92  | NIL | 306.58  | NIL | 297.39 | NIL | 337.69 |
| 6215 pSyMB | 2. SMB20604       | CDS | 1616147  | 1617322 | - | 30 | 30 | ON  | 316.5  | NIL | 310.92  | NIL | 306.58  | NIL | 295.4  | NIL | 299.53 |
| 6216 pSyMB | 2. SMB20605       | CDS | 16179075 | 1618932 | - | 30 | 30 | ON  | 373.4  | ON  | 370.37  | ON  | 398.08  | ON  | 431.15 | NIL | 350.9  |
| 6217 pSyMB | 2. SMB20606       | CDS | 1620367  | 1620367 | - | 30 | 30 | ON  | 382.21 | ON  | 371.48  | NIL | 347.18  | ON  | 343.01 | ON  | 309.08 |
| 6218 pSyMB | 2. SMB20607       | CDS | 1620580  | 1621029 | - | 30 | 30 | ON  | 334.32 | ON  | 370.7   | NIL | 322.83  | ON  | 370.58 | NIL | 317.55 |
| 6219 pSyMB | 2. SMB20608       | CDS | 1621026  | 1621490 | - | 30 | 30 | ON  | 348.86 | NIL | 321.04  | ON  | 411.72  | ON  | 472.54 | NIL | 412.13 |
| 6220 pSyMB | 2. SMB20609       | CDS | 1621861  | 1621861 | - | 30 | 30 | ON  | 398.79 | ON  | 334.51  | NIL | 366.47  | ON  | 377.86 | NIL | 358.47 |
| 6221 pSyMB | 2. SMB20610       | CDS | 1622168  | 1625548 | + | 31 | 31 | ON  | 318.96 | ON  | 330.93  | NIL | 342.36  | ON  | 369.76 | NIL | 323.72 |
| 6222 pSyMB | dcia: SMB20611    | CDS | 1625535  | 1625464 | + | 30 | 30 | ON  | 337.76 | ON  | 332.15  | NIL | 526.83  | ON  | 334.18 | NIL | 368.29 |
| 6223 pSyMB | dcia: SMB20612    | CDS | 1625792  | 1627902 | - | 30 | 30 | ON  | 443.11 | ON  | 361.47  | ON  | 343.47  | ON  | 366.11 | NIL | 343.23 |
| 6224 pSyMB | dcid: SMB20613    | CDS | 1628134  | 1629999 | + | 30 | 30 | ON  | 319.54 | NIL | 341.55  | NIL | 384.84  | ON  | 375.74 | NIL | 323.9  |
| 6225 pSyMB | 2. SMB20614       | CDS | 1630003  | 1631385 | + | 30 | 30 | ON  | 319.54 | NIL | 323.35  | NIL | 343.05  | ON  | 357.88 | NIL | 372.47 |
| 6226 pSyMB | 2. SMB20615       | CDS | 1631510  | 1633567 | - | 30 | 30 | ON  | 436.67 | NIL | 303.76  | NIL | 347.32  | NIL | 309.84 | ON  | 341.38 |
| 6227 pSyMB | thc: SMB20616     | CDS | 1633944  | 1635719 | + | 30 | 30 | ON  | 352.67 | NIL | 226.31  | NIL | 1309.9  | ON  | 495.25 | NIL | 433.09 |
| 6228 pSyMB | thc: SMB20617     | CDS | 1635781  | 1636758 | + | 30 | 30 | ON  | 363.83 | ON  | 2817.46 | ON  | 1405.67 | ON  | 633.76 | ON  | 605.2  |
| 6229 pSyMB | thc: SMB20618     | CDS | 1636955  | 1637728 | + | 30 | 30 | ON  | 315.26 | ON  | 1186.4  | ON  | 654.29  | ON  | 414.49 | ON  | 450.06 |
| 6230 pSyMB | 2. SMB20619       | CDS | 1637725  | 1639389 | + | 30 | 30 | NIL | 296.29 | ON  | 1027.55 | ON  | 391.43  | ON  | 395.68 | NIL | 368.37 |
| 6231 pSyMB | 2. SMB20620       | CDS | 1638400  | 1639432 | - | 30 | 30 | NIL | 368.84 | ON  | 497.92  | ON  | 379.43  | ON  | 362.87 | NIL | 312.57 |
| 6232 pSyMB | 2. SMB20621       | CDS | 1640522  | 1640475 | - | 30 | 30 | NIL | 314.56 | NIL | 327.49  | NIL | 301.97  | NIL | 360    | NIL | 263.88 |
| 6233 pSyMB | 2. SMB20622       | CDS | 1640522  | 1641478 | - | 30 | 30 | NIL | 262.2  | NIL | 291.6   | NIL | 245.29  | ON  | 335.4  | NIL | 267.76 |
| 6234 pSyMB | 2. SMB20623       | CDS | 1641558  | 1643081 | - | 30 | 30 | NIL | 332.34 | NIL | 316.35  | NIL | 348.49  | ON  | 335.4  | NIL | 345.33 |
| 6235 pSyMB | 2. SMB20624       | CDS | 1643117  | 1644488 | + | 30 | 30 | NIL | 295.59 | NIL | 288.02  | NIL | 309.44  | NIL | 332.27 | NIL | 314.3  |
| 6236 pSyMB | 2. SMB20625       | CDS | 1644485  | 1645579 | + | 30 | 30 | ON  | 358.52 | ON  | 323.64  | NIL | 401.02  | ON  | 381.3  | NIL | 370.53 |
| 6237 pSyMB | 2. SMB20626       | CDS | 1645604  | 1646809 | - | 30 | 30 | ON  | 328.13 | ON  | 380.24  | NIL | 328.75  | NIL | 341.48 | NIL | 336.08 |
| 6238 pSyMB | 2. SMB20627       | CDS | 1646885  | 1647871 | + | 30 | 30 | NIL | 289.94 | NIL | 288.7   | NIL | 317.04  | NIL | 305.63 | NIL | 320.32 |
| 6239 pSyMB | 2. SMB20628       | CDS | 1647906  | 1648211 | - | 31 | 31 | ON  | 484.3  | ON  | 540.3   | ON  | 399.77  | ON  | 496.86 | NIL | 368.1  |
| 6240 pSyMB | 2. SMB20629       | CDS | 1648566  | 1648480 | - | 30 | 30 | NIL | 376    | ON  | 411.12  | NIL | 300.08  | ON  | 496.86 | NIL | 339.85 |
| 6241 pSyMB | 2. SMB20630       | CDS | 1648844  | 1648844 | - | 30 | 30 | NIL | 310.17 | ON  | 340.25  | NIL | 353.34  | ON  | 496.86 | NIL | 339.85 |
| 6242 pSyMB | 2. SMB20631       | CDS | 1648919  | 1650004 | - | 30 | 30 | NIL | 300.04 | NIL | 290.29  | ON  | 373.91  | NIL | 338.41 | NIL | 325.67 |
| 6243 pSyMB | 2. SMB20632       | CDS | 1650017  | 1651939 | - | 30 | 30 | NIL | 320.31 | ON  | 334.2   | NIL | 337.91  | NIL | 330.82 | NIL | 335.43 |
| 6244 pSyMB | 2. SMB20633       | CDS | 1652822  | 1652822 | - | 30 | 30 | NIL | 287.81 | NIL | 272.6   | NIL | 257.23  | NIL | 283.44 | NIL | 311.63 |
| 6245 pSyMB | 2. SMB20634       | CDS | 1652927  | 1653736 | - | 30 | 30 | NIL | 290.77 | NIL | 288.38  | NIL | 271.19  | NIL | 302.24 | NIL | 254.13 |
| 6246 pSyMB | 2. SMB21706       | CDS | 1653927  | 1655162 | - | 30 | 30 | NIL | 330.55 | ON  | 327.02  | NIL | 312.12  | NIL | 326.48 | NIL | 346.54 |
| 6247 pSyMB | TRn19-2: SMB20636 | CDS | 1655715  | 1656018 | - | 30 | 30 | NIL | 294.52 | NIL | 303.96  | NIL | 386.06  | NIL | 309.34 | NIL | 328.13 |
| 6248 pSyMB | 2. SMB21630       | CDS | 1657750  | 1657750 | - | 55 | 0  | ON  | 414.29 | NIL | 321.44  | NIL | 315.89  | ON  | 357.07 | NIL | 328.13 |
| 6249 pSyMB | rsqc: SMB21631    | CDS | 1659035  | 1660132 | - | 30 | 30 | ON  | 847.67 | ON  | 299.89  | NIL | 458.09  | ON  | 442.23 | NIL | 402.36 |
| 6250 pSyMB | 2. SMB21632       | CDS | 1660552  | 1661568 | - | 30 | 30 | ON  | 555.14 | NIL | 286.09  | NIL | 318.57  | NIL | 314.18 | NIL | 311.96 |
| 6251 pSyMB | paag: SMB21633    | CDS | 1661661  | 1662452 | + | 30 | 30 | ON  | 341.76 | NIL | 310.06  | NIL | 371.59  | ON  | 312.01 | NIL | 352.75 |
| 6252 pSyMB | 2. SMB21634       | CDS | 1662486  | 1662989 | - | 31 | 31 | NIL | 228.16 | NIL | 329.66  | NIL | 230.88  | ON  | 264.55 | NIL | 295.78 |
| 6253 pSyMB | paaz: SMB21635    | CDS | 1662986  | 1664995 | - | 30 | 30 | NIL | 343.71 | ON  | 357.56  | NIL | 324     | NIL | 344.75 | NIL | 333.85 |
| 6254 pSyMB | paaf: SMB21636    | CDS | 1665103  | 1666179 | - | 30 | 30 | ON  | 416.5  | ON  | 403.36  | ON  | 406.06  | ON  | 402.58 | ON  | 424.01 |

[illegible]
